# Supplementary material
Source: PubMed Central journal article supplement (PMC4758866)
Supplement: NIHMS739707-supplement-001249_-_Supplemental_Material.pdf [file NIHMS739707-supplement-001249_-_Supplemental_Material.pdf]

## SUPPLEMENTAL MATERIALS

### SUPPLEMENTAL METHODS

**Experimental Design.** The workflow of the study: 1) equal number of male and female mice were used in each genotype group for glycopeptide isolation (n=8/group); 2) peptides were analyzed by LC-MS/MS and quantified by label-free quantification method using peak area; and 3) protein targets were validated by immunoblotting and cleavage assays.

**Tissue samples and protein extraction.** The LV infarct (LVI) region was collected at 0, 1, 3, 5, and 7 days post-MI as described previously, and the LV tissue was homogenized sequentially in phosphate buffered saline (PBS; 16  $\mu$ L per mg LV wet weight) with 1x protease inhibitors (Roche, Basel, Switzerland) to remove the soluble proteins and then in Reagent 4 (16  $\mu$ L per mg LV wet weight; Sigma, St. Louis, MO) with 1x protease inhibitors for the insoluble proteins.<sup>1, 2</sup> Because the insoluble fraction is enriched for ECM, we used that fraction for the glycoproteomic analysis.

Immunoblotting also used the insoluble fraction for confirmation of glycoproteomic findings.

**Trypsin digestion.** Total protein from the insoluble fraction (1 mg) was denatured and reduced by adding 8 M urea and 12 mM Tris (2-carboxyethyl) phosphine hydrochloride (TCEP) in 1 M ammonium bicarbonate and incubating at 37°C for 1 h. The samples were alkylated with 16 mM iodoacetamide at room temperature in the dark for 30 min. The samples were diluted 5-fold with water prior to the addition of trypsin (Promega, Madison, WI), which was added at a ratio of 1:50 (w/w, enzyme:protein). The samples were digested at 37°C overnight with gentle shaking. The samples were centrifuged to

remove precipitate. Peptides were cleaned by Sep-Pak Vac C18 cartridge (Waters, Milford, MA). Peptide concentration was determined by BCA assay (Thermo Fisher Scientific, Rochford, IL).

***N*-Linked glycopeptide capture.** *N*-linked glycopeptides were isolated from the tryptic peptides using the solid phase extraction of glycopeptides (SPEG) method. Briefly, 0.8 mg of peptides was oxidized by 10 mM sodium periodate (Bio-Rad, Hercules, CA) at room temperature for 1 h. Glycopeptides were covalently conjugated to a solid support via hydrazide chemistry (Bio-Rad, Hercules, CA), with incubation at room temperature overnight. The hydrazide beads were washed with 1.5 M NaCl, and water prior to release of formerly *N*-linked glycopeptides from solid support by PNGase F (New England Biolabs, Ipswich, MA) at 37°C overnight. The eluent was purified by Sep-Pak Vac C18 cartridge (Waters, Milford, MA) and resuspended in 20  $\mu$ L of 0.4% acetic acid.

**Mass spectrometry analysis.** For the RefSeq database search, the precursor mass tolerance and fragment mass tolerance were set at 15 ppm and 0.05 Da, respectively. Trypsin was specified as the protease. The fixed modification was set as carbamidomethylation (C), and other modifications were set as flexible modification as follows: deamidation (N) and oxidation (M). Full-tryptic end and two missed cleavage sites were allowed. A decoy version of the RefSeq mouse database was used to estimate peptide and protein false discovery rate. The average specificity of the glycopeptide isolation was ~92%, indicating that ~8% of the total identified peptides were non-glycopeptides. The non-glycosylated peptides were removed from the list. To assess the reproducibility of the quantification, one sample was analyzed twice as a technical replicate. **Supplemental Figure S1B** shows that the technical replicate had

good reproducibility ( $R^2=0.991$ ,  $p<0.0001$ ). We confirmed glycosylation for fibronectin,  $\gamma$ -sarcoglycan, and periostin (**Supplemental Figure S2**). A total of 243 proteins (45%) were identified as having two or more glycopeptides, whereas 298 (55%) were identified as having one unique glycopeptide. The majority (92%, 278 of 298 single glycopeptide identifications) were identified at least twice (the peptide spectra matched  $\geq 2$ ). For the 20 single glycopeptides identified only once, the annotated MS/MS spectra are provided in **Supplemental Figure S3**. A total of 35% of the *N*-linked glycoproteome fell in the extracellular region gene ontology (GO) category, while 33% in the plasma membrane and 10% in the cell surface GO categories (**Supplemental Figure S1C** and **Supplemental Table S4**). Taking into account nonexclusive localization in GO, 78% of the *N*-glycoproteome was located outside the plasma membrane, indicating the glycopeptide isolation strategy was successfully enriched for extracellular proteins.

**LC-MS quantification.** Peptides were quantified by label-free relative quantification based on integrated peptide peak intensities using the SIEVE software, version 2.1 (Thermo Fisher Scientific, San Jose, CA). Frame parameters were set as an RT width of 2.5 min and an MZ width of 6 ppm, with intensity threshold of  $10^6$ . The peak intensity was normalized to Total Ion Current (TIC) by SIEVE. A frame abundance ratio was calculated as the ratio of the average integrated intensity of the eight null samples to the average integrated intensity of the eight WT samples. The significance of the difference between 8 WT and 8 null for each frame was calculated using the Student's t-test. When Bonferroni multiple testing correction was applied, the  $\alpha$  was set at  $4.1 \times 10^{-4}$ . Frames were identified by importing Proteome Discoverer searched files. The false discovery rate was calculated as the ratio of changed proteins in 8000 permutation of

the genotype groups against that in the right genotype groups. Unsupervised clustering was performed using normalized peak areas of the identified glycopeptides.

**Immunoblot analysis.** Total protein (10 µg) was separated on 4-12% Criterion™ XT Bis-Tris gels (Bio-Rad), transferred to a nitrocellulose membrane (Bio-Rad), and stained with MemCode™ Reversible Protein Stain Kit (Thermo Scientific) to verify protein concentration and loading accuracy. After blocking with 5% nonfat milk (Bio-Rad), the membrane was probed with primary antibodies: rabbit anti-CD36 polyclonal antibody (Novus Biologicals NB400-144) at 1:1000, goat anti-CILP antibody (Aviva Systems Biology, OAEB01146) at 1:1000, or rabbit anti-caspase-3 (Cell Signaling, 9662) at 1:1000 followed by secondary antibody (Santa Cruz, SC2020, 1:5000), and detected with ECL Prime Western Blotting Detection Substrate (Amersham).

**RT-PCR analysis.** RNA extraction was performed on the LVI tissue using PureLink RNA Mini Kit (Invitrogen, 12183-018A). RNA levels were quantified using the NanoDrop ND-1000 Spectrophotometer (Thermo Scientific). Reverse transcription of equal RNA content (30 ng) was performed using the High Capacity RNA-to-cDNA Kit (Life Technologies 4837406). CILP, CD36, *Ltbp2*, *Col6a6*, *Col6a1*, *Lama5*, and *Fbln1* gene expression levels were assessed using specific primers (CILP, Mm00557687\_m1; CD36, Mm01135198\_m1; *Ltbp2*, Mm01307379\_m1; *Col6a6*, Mm00556810\_m1; *Col6a1*, Mm00487160\_m1; *Lama5*, Mm01222029\_m1; and *Fbln1*, Mm00515705\_m1). All values were normalized to hypoxanthine guanine phosphoribosyl transferase 1 (*Hprt1*, Mm01545399\_m1) housekeeping gene. The experiments were performed according to the MIQE guidelines with one exception. *Hprt1*, was the only reference

gene showing no change in expression (Gusb, Hsp90ab1, Actb and Gapdh are all significantly changed post-MI).<sup>3</sup>

***In vitro* cleavage assay.** Mouse CD36 recombinant protein (R&D Systems, Minneapolis, MN) was incubated with active MMP-2 (R&D, Minneapolis, MN), MMP-9 (Calbiochem/Millipore, Darmstadt, Germany), or MMP-12 (Enzo Life Science, Framingdale, NY) recombinant protein at a ratio of 2:1 in 1X zymogram developing buffer (Bio-Rad, Hercules, CA). The recombinant protein/MMP mixtures were incubated at 37 °C for 24 h. Two negative controls, MMP alone or recombinant protein alone, were included and went through the same procedure. Samples were run on an SDS-PAGE, followed by silver staining (GEHealthcare, 17-115-001).

**Immunofluorescence or immunohistochemistry.** For histological analysis, the middle section (mid-papillary region) from day 7 post-MI LVs were embedded in paraffin and sectioned at 5 µm. Immunofluorescence or immunohistochemistry was performed using anti-rabbit CD36 antibody (Novus Biological NV400-144; 1:100), anti-mouse Mac3 Antibody (Cedarlane CL8943AP; 1:100), anti-mouse neutrophils (Cedarlane; CL8993AP; 1:100) and terminal deoxynucleotidyl transferase dUTP nick end labeling (TUNEL; Roche Diagnostics; 11684809910). Blocking was performed in goat serum (Vector Laboratories, PK-6101) and secondary antibodies used were Alexa Fluor 488 conjugate (Invitrogen, S32354) and Alexa Fluor 546 conjugate (Invitrogen, S11225). For CD36 and Mac-3 staining, slides were first blocked for 20 min. After blocking, slides were incubated overnight in anti-rabbit CD36 followed by 30 min incubation in streptavidin and Alexa Fluor 488. Slides were then incubated overnight in anti-mouse Mac3 to stain for macrophages. Afterwards streptavidin and Alexa Fluor 546 were

applied and slides were incubated for 30 min. For TUNEL and neutrophil dual immunofluorescence, TUNEL reaction mixture was added and slides were incubated for 60 min at 37 °C. After TUNEL incubation period, neutrophil antibody was added and slides were incubated overnight. Alexa Fluor 546 was added to slides and incubated for 1 h. For neutrophil detection, HistoMark Black (KPL 54-75-00) was used to visualize positive staining, with eosin as a counterstain. Negative controls were incubated with no primary antibody. To quantify staining, five random images were captured 40x magnification. Quantification was measured by Image-Pro Plus version 6.2. Representative images are shown at 60x magnification.

**Phagocytosis Assay.** LVI tissue was dissociated into single-cell suspension using 600 U/mL collagenase type II (Worthington Biochemicals, CLS-2) and 60 U/mL DNase1 (AppliChem, A3778.0500). Cells were washed and resuspended in cold PBS supplemented with 0.5% bovine serum albumin (BSA) and 2 mM Ethylenediamine-tetraacetic acid (EDTA). Cells were sequentially incubated with Ly-6G microbeads (Miltenyi Biotec, 130-092-332) to remove neutrophils, and with CD11b microbeads (Miltenyi Biotec, 130-049-601) to isolate macrophages. Positive cells were isolated using magnetic MS columns (Miltenyi Biotec, 130-042-201), and cell number was adjusted to  $10^6$ /mL using Dulbecco's Modified Eagle's medium (DMEM) + 10% fetal bovine serum (FBS). Cell suspensions (100 uL per well) were cultured overnight. Cells were incubated with 1 ng/uL of active MMP-9 (Calbiochem/Millipore, Darmstadt, Germany), CD36 blocking peptide (CD36i; Calbiochem/Millipore, Darmstadt, Germany), or a 1:1 mixture of MMP-9 and CD36i for 3 hours. Cells incubated with fresh media were used as the unstimulated negative controls. The cells were incubated with

fluorescent BioParticle suspension (100  $\mu$ L) for 2 h, then incubated in Trypan Blue for 1 min. Quantification was measured by SpectraMax M3 Plate Reader (excitation: 480 nm; emission: 520 nm). Representative images are shown at 40X.

**Blood neutrophil isolation and stimulation.** Briefly, blood was collected in heparinized tubes from the common carotid arteries of 5 mice and pooled, and neutrophils were separated by density gradient centrifugation at 250  $\times$ g for 35 min using lympholyte poly cell separating media (Cedarlane, CL5070) followed by hypotonic lysis of erythrocytes using red cell lysis buffer (Miltenyi biotec). A single cell suspension was achieved with pre-separation filters (Miltenyi Biotec 130-041-407, 30  $\mu$ m) and the cellular pellet resuspended in PEB buffer (PBS containing 0.5% BSA and 2 mM EDTA). The cell suspension was serially incubated with anti-Ly-6G MicroBead Kit mouse (10 min, Miltenyi Biotec, 130-092-332) and CD11b MicroBeads mouse/human (Miltenyi Biotec, 130-049-601) and isolated using a MiniMACS magnetic separator column. Ly-6G+ neutrophils was resuspended in 1 mL of RPMI 1640 media and plated in a 6-well plate ( $1.5 \times 10^5$  cells/well). The neutrophils were treated with 0.5 ng/uL of active MMP-9 (Calbiochem/Millipore, Darmstadt, Germany) or CD36 blocking peptide (CD36i; Calbiochem/Millipore, Darmstadt, Germany), and incubated at 37°C for 3 h. Cells incubated with fresh media were used as the unstimulated negative controls. Cells were harvested for RNA isolation and RT-PCR was performed. Casp3, Casp9, Bax, and Xiap gene expression levels were assessed using specific primers (Caspase 3, Mm01195085\_m1; Caspase 9, Mm00516563\_m1; Bax, Mm00432051\_m1; and Xiap, Mm01311594\_mH). The gene levels were normalized to Hprt1 and expressed as  $2^{-\Delta Ct}$  values  $\pm$  SEM.

## SUPPLEMENTAL REFERENCES

1. Zamilpa R, Zhang J, Chiao YA, de Castro Bras LE, Halade GV, Ma Y, et al. Cardiac wound healing post-myocardial infarction: A novel method to target extracellular matrix remodeling in the left ventricle. *Methods Mol Biol.* 2013;1037:313-324.
2. de Castro Bras LE, Ramirez TA, DeLeon-Pennell KY, Chiao YA, Ma Y, Dai Q, et al. Texas 3-step decellularization protocol: Looking at the cardiac extracellular matrix. *J Proteomics.* 2013;86:43-52.
3. Lindsey ML, Iyer RP, Zamilpa R, Yabluchanskiy A, DeLeon-Pennell KY, Hall ME, et al. A novel collagen matricryptin reduces left ventricular dilation post-myocardial infarction by promoting scar formation and angiogenesis. *J Am Coll Cardiol.* 2015;66:1364-1374.



SUPPLEMENTAL TABLES

**Supplemental Table S1.** Animal numbers used for study.

|                                          | <b>WT</b> |      |      |      |    | <b>MMP-9 null</b> |      |      |      |    |
|------------------------------------------|-----------|------|------|------|----|-------------------|------|------|------|----|
|                                          | D0        | D1   | D3   | D5   | D7 | D0                | D1   | D3   | D5   | D7 |
| Proteomics                               | 8         | ---- | ---- | ---- | 8  | 8                 | ---- | ---- | ---- | 8  |
| Immunoblotting &<br>immunohistochemistry | 8         | 8    | 8    | 8    | 8  | 8                 | 8    | 8    | 8    | 8  |
| Phagocytosis & apoptosis                 | 5         | ---- | ---- | ---- | 5  | 5                 | ---- | ---- | ---- | 5  |

**Supplemental Table S2.** A total of 1161 unique N-linked glycopeptides were quantified by LC-MS, with a 1% false discovery rate, and these sites represented 541 unique glycoproteins.

| Accession # | Protein                                                                      | # of Pep | PEPTIDE                               | Modification                                         | XCorr | Charge | m/z [Da] |
|-------------|------------------------------------------------------------------------------|----------|---------------------------------------|------------------------------------------------------|-------|--------|----------|
| 34328417    | Sarcalumenin                                                                 | 2        | VYGALFWSLAPLINVTEPPR                  | Deamidated(14)                                       | 4.18  | 3      | 748.7    |
| 27734196    | Cartilage intermediate layer protein                                         | 2        | EQRPGQNCNSNYTVR                       | Carbamidomethyl(8)Deamidated(7)                      | 3.17  | 3      | 570.6    |
| 568916058   | Sialoadhesin                                                                 | 2        | MNPAGPVLENETVTLICSTPK                 | Carbamidomethyl(17)Deamidated(10)                    | 4.82  | 2      | 1144.6   |
| 568933000   | Platelet glycoprotein 4                                                      | 5        | QFWIFDVQNPDDVAKNSSK                   | Oxidation(1)                                         | 5.94  | 3      | 747.0    |
| 568933000   | Platelet glycoprotein 4                                                      | 5        | RPYIVPILWLNETGTIGDEK                  | Deamidated(11)                                       | 5.81  | 3      | 772.4    |
| 568986620   | Clusterin                                                                    | 3        | SGSGLVGQQLLEEFLNQSSPFYFWMNGDR         | Deamidated(15)Deamidated(25)Oxidation(24)            | 3.81  | 3      | 1070.8   |
| 158341636   | latent-transforming growth factor beta-binding protein 2                     | 1        | DSSPQAAHVNHLSPPWGLNLTEK               | Deamidated(19)                                       | 5.03  | 4      | 625.6    |
| 6753138     | Sodium/potassium-transporting ATPase subunit                                 | 4        | LDWLGNCGLNDDSYGYR                     | Carbamidomethyl(7)Deamidated(6)                      | 4.13  | 2      | 1053.4   |
| 156616286   | Collagen alpha-6(VI) chain                                                   | 11       | LNANLLSSLWDTFQNK                      | Deamidated(15)                                       | 4.82  | 2      | 933.0    |
| 161016843   | Desmoglein-2                                                                 | 4        | NTGELNITSILDR                         | Deamidated(6)                                        | 2.73  | 2      | 723.9    |
| 568924429   | Ceramide synthase 2                                                          | 1        | LWLVPVNLTWADLEDKDGR                   | Deamidated(6)                                        | 4.79  | 3      | 714.7    |
| 6753484     | Collagen alpha-1(VI) chain                                                   | 5        | RNFTAADWGHRS                          | Deamidated(2)                                        | 3.99  | 3      | 473.6    |
| 568920137   | Laminin subunit alpha-5                                                      | 15       | EQLQGINASSAAWAR                       | Deamidated(7)                                        | 3.39  | 2      | 801.9    |
| 160333372   | Lumican                                                                      | 5        | AFENVTDLQWLILDHNLLENSK                | Deamidated(4)                                        | 5.41  | 3      | 871.8    |
| 61651673    | Dolichyl-diphosphooligosaccharide--protein glycosyltransferase subunit STT3B | 1        | TTLVDNNTWNNSHIALVGK                   | Deamidated(10)                                       | 3.72  | 3      | 700.0    |
| 568947434   | Aminopeptidase N                                                             | 9        | SGQEDHYWLDVEKNQSAK                    | Deamidated(14)                                       | 3.59  | 3      | 712.3    |
| 594542525   | Angiopoietin-1 receptor                                                      | 1        | VLPEPLHAPNVIDTGHNFAIINISSEPYFGDGPIK   | Deamidated(22)                                       | 4.98  | 4      | 944.0    |
| 27370240    | Leucyl-cystinyl aminopeptidase                                               | 8        | VNSNMTGYYIVHYAHDDWTALINQLK            | Deamidated(4)Oxidation(5)                            | 6.88  | 4      | 771.6    |
| 170784829   | Procollagen galactosyltransferase 1                                          | 2        | TALWVATDHNTDNTSAILR                   | Deamidated(13)                                       | 5.4   | 3      | 700.7    |
| 238637279   | 4F2 cell-surface antigen heavy chain                                         | 1        | APLMPWNESSIFHIPRPVSLNMTVK             | Deamidated(7)Deamidated(21)Oxidation(4)Oxidation(22) | 3.66  | 4      | 725.4    |
| 755498697   | Fibrillin-1                                                                  | 5        | AWGTPCELCPVNTSEYK                     | Carbamidomethyl(6)Carbamidomethyl(9)Deamidated(13)   | 3.25  | 2      | 1050.5   |
| 568911077   | Nicastrin                                                                    | 4        | ANNSWFQSILK                           | Deamidated(2)                                        | 3.44  | 2      | 654.8    |
| 6680840     | Calumenin                                                                    | 2        | GHDLNEDGLVSWEEYKNATYGYVLLDDPDPDDGFNYK | Deamidated(17)                                       | 5.36  | 4      | 1038.7   |
| 172072617   | Peptidyl-prolyl cis-trans isomerase FKBP9                                    | 3        | YHYNASLLDGTLLDSTWNLGK                 | Deamidated(4)                                        | 5.16  | 3      | 794.7    |
| 755537649   | Platelet endothelial cell adhesion molecule                                  | 8        | EKEDRPFHQAVVNDTQAFWHNK                | Deamidated(13)                                       | 6.74  | 5      | 540.3    |

| MH+ [Da] | RT [min] | PSM | WT-1     | WT-2     | WT-3     | WT-4     | WT-5     | WT-5-2   | WT-6     | WT-7     | WT-8     | Null-1   | Null-2   |
|----------|----------|-----|----------|----------|----------|----------|----------|----------|----------|----------|----------|----------|----------|
| 2244.2   | 74.7     | 20  | 6.58E+02 | 4.88E+03 | 5.81E+02 | 0.00E+00 | 3.22E+03 | 4.60E+03 | 2.18E+02 | 8.71E+03 | 5.62E+02 | 1.67E+02 | 0.00E+00 |
| 1709.8   | 19.9     | 5   | 1.05E+04 | 9.00E+02 | 2.33E+04 | 0.00E+00 | 2.93E+04 | 0.00E+00 | 1.21E+04 | 1.16E+04 | 1.78E+03 | 6.98E+04 | 1.30E+05 |
| 2288.1   | 52.1     | 22  | 2.39E+04 | 5.69E+03 | 5.39E+04 | 1.16E+04 | 3.74E+04 | 3.34E+04 | 3.46E+03 | 2.58E+04 | 8.53E+04 | 5.52E+04 | 1.66E+06 |
| 2239.1   | 52.3     | 11  | 3.46E+04 | 5.50E+04 | 0.00E+00 | 2.85E+05 | 0.00E+00 | 0.00E+00 | 2.45E+04 | 1.76E+04 | 1.91E+05 | 8.73E+05 | 2.67E+05 |
| 2315.2   | 57.9     | 2   | 1.89E+04 | 3.55E+03 | 1.30E+04 | 1.04E+05 | 8.39E+04 | 4.48E+04 | 7.65E+03 | 4.79E+03 | 1.62E+05 | 1.21E+05 | 8.94E+04 |
| 3210.4   | 73.7     | 25  | 1.14E+04 | 1.33E+05 | 0.00E+00 | 1.22E+05 | 0.00E+00 | 7.54E+03 | 5.83E+03 | 2.61E+04 | 5.54E+04 | 9.41E+04 | 2.04E+04 |
| 2499.2   | 42.2     | 10  | 2.08E+04 | 6.90E+03 | 0.00E+00 | 1.09E+05 | 6.75E+03 | 0.00E+00 | 0.00E+00 | 4.15E+03 | 5.43E+04 | 1.55E+05 | 1.93E+04 |
| 2105.9   | 50.7     | 6   | 4.21E+03 | 0.00E+00 | 5.92E+03 | 2.92E+04 | 1.35E+04 | 1.40E+04 | 0.00E+00 | 0.00E+00 | 4.09E+04 | 7.01E+04 | 2.77E+04 |
| 1864.9   | 67.3     | 14  | 9.98E+03 | 2.29E+04 | 7.57E+03 | 5.97E+04 | 4.87E+03 | 0.00E+00 | 1.39E+04 | 2.39E+04 | 4.81E+04 | 8.32E+04 | 6.76E+04 |
| 1446.7   | 53.3     | 17  | 1.18E+05 | 1.53E+05 | 2.83E+05 | 1.03E+05 | 4.84E+05 | 4.70E+05 | 1.19E+05 | 2.55E+05 | 3.86E+05 | 2.85E+05 | 7.21E+06 |
| 2142.1   | 63.0     | 6   | 4.95E+03 | 3.35E+04 | 0.00E+00 | 6.16E+04 | 0.00E+00 | 1.13E+03 | 2.69E+03 | 1.53E+04 | 2.00E+04 | 4.87E+04 | 4.07E+04 |
| 1418.7   | 25.5     | 10  | 6.88E+04 | 1.99E+04 | 2.75E+04 | 8.47E+03 | 1.03E+05 | 8.14E+04 | 2.80E+04 | 3.96E+04 | 1.42E+05 | 2.16E+05 | 2.95E+04 |
| 1602.8   | 38.4     | 2   | 1.91E+03 | 5.30E+03 | 5.27E+03 | 2.08E+04 | 2.02E+04 | 2.83E+04 | 1.46E+04 | 5.31E+03 | 2.12E+04 | 5.91E+04 | 4.26E+03 |
| 2613.3   | 64.8     | 12  | 1.25E+04 | 4.15E+04 | 2.94E+04 | 1.19E+05 | 7.01E+04 | 6.32E+04 | 1.06E+04 | 4.39E+04 | 2.13E+04 | 2.13E+05 | 5.10E+04 |
| 2098.1   | 41.3     | 7   | 1.94E+04 | 8.99E+03 | 2.47E+03 | 9.82E+04 | 3.02E+03 | 8.98E+03 | 3.71E+03 | 4.24E+03 | 8.39E+04 | 1.05E+05 | 9.22E+03 |
| 2135.0   | 31.0     | 3   | 1.20E+04 | 6.95E+03 | 0.00E+00 | 5.08E+04 | 1.25E+04 | 2.96E+03 | 5.05E+03 | 0.00E+00 | 4.52E+04 | 4.10E+04 | 9.52E+03 |
| 3772.9   | 57.4     | 3   | 3.03E+04 | 1.88E+04 | 3.93E+04 | 2.49E+04 | 2.43E+04 | 3.35E+04 | 1.26E+03 | 4.64E+04 | 3.95E+04 | 1.75E+04 | 4.03E+05 |
| 3083.5   | 57.7     | 3   | 6.65E+03 | 4.03E+04 | 2.55E+03 | 2.96E+04 | 5.98E+03 | 5.69E+03 | 1.61E+03 | 2.57E+04 | 3.28E+04 | 3.30E+04 | 1.96E+04 |
| 2100.0   | 42.0     | 7   | 3.27E+04 | 8.99E+03 | 9.01E+03 | 1.44E+05 | 1.56E+04 | 3.20E+04 | 7.55E+03 | 1.13E+04 | 9.41E+04 | 1.48E+05 | 3.07E+04 |
| 2898.5   | 52.0     | 2   | 2.33E+04 | 2.35E+04 | 4.89E+03 | 4.63E+04 | 1.75E+04 | 0.00E+00 | 3.90E+03 | 6.04E+03 | 6.02E+04 | 3.23E+04 | 1.07E+05 |
| 2099.9   | 41.8     | 9   | 2.48E+04 | 5.86E+03 | 2.16E+04 | 1.67E+05 | 7.76E+04 | 7.61E+04 | 1.19E+04 | 7.88E+03 | 9.91E+04 | 1.65E+05 | 3.88E+04 |
| 1308.7   | 53.0     | 1   | 6.25E+03 | 1.62E+04 | 1.50E+03 | 4.07E+04 | 8.54E+03 | 8.34E+03 | 8.07E+03 | 1.50E+04 | 3.44E+04 | 5.29E+04 | 3.34E+04 |
| 4151.8   | 54.4     | 5   | 0.00E+00 | 8.29E+04 | 0.00E+00 | 6.85E+04 | 2.05E+04 | 2.02E+04 | 2.93E+03 | 3.90E+04 | 3.16E+04 | 5.86E+04 | 7.79E+04 |
| 2382.2   | 58.6     | 3   | 8.70E+03 | 2.50E+04 | 2.34E+03 | 6.88E+04 | 5.91E+03 | 4.84E+03 | 4.28E+03 | 2.67E+03 | 3.92E+04 | 1.94E+04 | 1.68E+04 |
| 2697.3   | 33.7     | 3   | 2.40E+04 | 5.66E+03 | 3.90E+03 | 4.12E+04 | 1.30E+04 | 1.12E+04 | 1.26E+04 | 9.51E+03 | 6.68E+04 | 6.30E+04 | 4.79E+04 |

| Null-3   | Null-4   | Null-5   | Null-6   | Null-7   | Null-8   | Ratio<br>Null/WT | SD       | p value  | N Ratio | N SD     | N p value | Avg_WT   | Avg_Null |
|----------|----------|----------|----------|----------|----------|------------------|----------|----------|---------|----------|-----------|----------|----------|
| 3.48E+02 | 1.49E+02 | 0.00E+00 | 3.96E+05 | 8.63E+04 | 6.02E+03 | 23.50            | 8.02E+01 | 2.71E-01 | 24.80   | 8.92E+01 | 2.75E-01  | 1.63E+03 | 4.03E+04 |
| 5.67E+04 | 1.09E+05 | 7.54E+04 | 9.58E+04 | 1.21E+05 | 1.04E+05 | 9.60             | 1.29E+01 | 1.10E-05 | 13.13   | 1.51E+01 | 9.90E-07  | 5.39E+03 | 7.07E+04 |
| 5.56E+04 | 5.01E+04 | 1.34E+05 | 7.91E+04 | 1.15E+05 | 3.74E+04 | 8.79             | 2.54E+01 | 2.62E-01 | 9.42    | 3.04E+01 | 2.52E-01  | 2.11E+04 | 1.99E+05 |
| 7.47E+05 | 2.54E+05 | 3.37E+05 | 1.70E+06 | 2.27E+05 | 0.00E+00 | 8.15             | 2.03E+01 | 4.11E-02 | 9.35    | 2.30E+01 | 2.93E-02  | 4.59E+04 | 4.29E+05 |
| 3.12E+05 | 3.85E+05 | 3.38E+05 | 1.38E+06 | 2.42E+05 | 1.14E+04 | 7.31             | 1.71E+01 | 8.24E-02 | 7.93    | 2.08E+01 | 5.66E-02  | 3.34E+04 | 2.65E+05 |
| 2.64E+05 | 1.06E+05 | 7.72E+04 | 1.36E+06 | 2.33E+05 | 4.68E+04 | 6.86             | 2.01E+01 | 1.81E-01 | 7.62    | 2.09E+01 | 1.47E-01  | 2.57E+04 | 1.96E+05 |
| 1.34E+05 | 2.15E+05 | 9.76E+04 | 3.45E+05 | 1.02E+05 | 0.00E+00 | 5.95             | 1.47E+01 | 2.52E-02 | 7.12    | 1.66E+01 | 1.55E-02  | 1.45E+04 | 1.03E+05 |
| 4.32E+04 | 9.34E+04 | 9.56E+04 | 1.77E+05 | 7.34E+04 | 0.00E+00 | 6.06             | 1.18E+01 | 1.49E-02 | 6.74    | 1.53E+01 | 8.58E-03  | 8.20E+03 | 5.53E+04 |
| 1.19E+05 | 8.97E+04 | 7.39E+04 | 4.43E+05 | 9.30E+04 | 2.06E+04 | 5.83             | 1.18E+01 | 6.46E-02 | 6.37    | 1.30E+01 | 4.00E-02  | 1.44E+04 | 9.16E+04 |
| 3.05E+05 | 2.55E+05 | 4.38E+05 | 3.99E+05 | 3.80E+05 | 3.21E+05 | 4.55             | 1.19E+01 | 3.13E-01 | 5.42    | 1.44E+01 | 2.85E-01  | 1.61E+05 | 8.72E+05 |
| 7.79E+04 | 3.61E+04 | 3.28E+04 | 2.82E+05 | 3.70E+04 | 3.40E+03 | 4.51             | 1.17E+01 | 1.29E-01 | 5.30    | 1.22E+01 | 8.31E-02  | 9.77E+03 | 5.17E+04 |
| 1.89E+05 | 2.87E+05 | 2.66E+05 | 8.78E+05 | 2.51E+05 | 1.93E+04 | 4.63             | 8.21E+00 | 6.30E-02 | 5.25    | 1.04E+01 | 3.71E-02  | 3.81E+04 | 2.00E+05 |
| 4.92E+04 | 6.83E+04 | 4.34E+04 | 1.84E+05 | 2.63E+04 | 0.00E+00 | 3.98             | 7.00E+00 | 8.86E-02 | 5.09    | 8.84E+00 | 4.82E-02  | 8.16E+03 | 4.16E+04 |
| 1.31E+05 | 9.74E+04 | 4.29E+04 | 6.74E+05 | 7.04E+04 | 4.02E+04 | 3.61             | 7.39E+00 | 1.61E-01 | 4.83    | 8.73E+00 | 9.72E-02  | 2.56E+04 | 1.23E+05 |
| 8.62E+04 | 1.80E+05 | 9.95E+04 | 3.12E+05 | 1.18E+05 | 0.00E+00 | 4.40             | 1.02E+01 | 4.31E-02 | 4.81    | 1.16E+01 | 2.68E-02  | 1.80E+04 | 8.63E+04 |
| 3.52E+04 | 1.08E+05 | 6.61E+04 | 2.09E+05 | 4.91E+04 | 7.51E+02 | 4.31             | 9.98E+00 | 7.71E-02 | 4.79    | 1.17E+01 | 5.10E-02  | 1.01E+04 | 4.86E+04 |
| 3.03E+04 | 9.99E+04 | 1.23E+05 | 1.14E+05 | 1.18E+05 | 3.92E+04 | 4.12             | 6.21E+00 | 7.87E-02 | 4.73    | 7.95E+00 | 6.50E-02  | 1.82E+04 | 8.61E+04 |
| 4.38E+04 | 4.51E+04 | 5.11E+04 | 2.68E+05 | 1.15E+05 | 1.10E+04 | 4.37             | 9.00E+00 | 1.03E-01 | 4.57    | 9.51E+00 | 7.32E-02  | 1.15E+04 | 5.25E+04 |
| 1.25E+05 | 1.77E+05 | 1.31E+05 | 4.10E+05 | 1.31E+05 | 1.45E+04 | 3.69             | 7.53E+00 | 4.49E-02 | 4.34    | 8.90E+00 | 2.28E-02  | 2.56E+04 | 1.11E+05 |
| 4.35E+04 | 8.38E+04 | 7.70E+04 | 2.35E+05 | 7.76E+04 | 1.57E+04 | 4.08             | 7.39E+00 | 3.46E-02 | 4.33    | 8.83E+00 | 1.99E-02  | 1.42E+04 | 6.15E+04 |
| 1.02E+05 | 3.61E+05 | 1.65E+05 | 4.77E+05 | 1.72E+05 | 0.00E+00 | 3.39             | 6.32E+00 | 5.80E-02 | 4.29    | 8.10E+00 | 3.23E-02  | 3.28E+04 | 1.41E+05 |
| 7.30E+04 | 4.39E+04 | 3.84E+04 | 1.68E+05 | 3.55E+04 | 1.40E+03 | 3.61             | 6.33E+00 | 5.64E-02 | 4.14    | 7.65E+00 | 3.18E-02  | 1.03E+04 | 4.26E+04 |
| 7.59E+04 | 1.03E+05 | 9.53E+04 | 3.59E+05 | 5.58E+04 | 0.00E+00 | 3.50             | 7.18E+00 | 9.94E-02 | 4.13    | 7.94E+00 | 5.48E-02  | 1.86E+04 | 7.68E+04 |
| 5.85E+04 | 7.35E+04 | 3.94E+04 | 2.86E+05 | 2.32E+04 | 5.40E+03 | 3.63             | 9.74E+00 | 1.96E-01 | 4.13    | 1.06E+01 | 1.41E-01  | 1.16E+04 | 4.79E+04 |
| 5.93E+04 | 8.87E+04 | 8.84E+04 | 2.01E+05 | 8.37E+04 | 3.56E+03 | 3.81             | 6.48E+00 | 2.27E-02 | 4.10    | 8.28E+00 | 1.20E-02  | 1.46E+04 | 5.99E+04 |

| Accession # | Protein                                                                                 | # of Pep | PEPTIDE                                 | Modification                                                                       | XCorr | Charge | m/z [Da] |
|-------------|-----------------------------------------------------------------------------------------|----------|-----------------------------------------|------------------------------------------------------------------------------------|-------|--------|----------|
| 568939471   | Serum<br>paraoxonase/arylesterase 1                                                     | 2        | HANWTLTPLK                              | Deamidated(3)                                                                      | 3.13  | 2      | 591.3    |
| 568926396   | Tenascin                                                                                | 12       | ASTEEVPSLENLTVTEAGWDGLR                 | Deamidated(11)                                                                     | 4.18  | 3      | 825.7    |
| 31982236    | Integrin alpha 6                                                                        | 3        | LWNSTFLEEYSK                            | Deamidated(3)                                                                      | 3.06  | 2      | 759.4    |
| 568991244   | Collagen alpha-1(XIV) chain                                                             | 4        | SFMVNWWTQSPGK                           | Deamidated(5)Oxidation(3)                                                          | 3.33  | 2      | 699.8    |
| 6678085     | Alpha-1-antitrypsin 1-4                                                                 | 2        | ELVHQSNTSNIFFSPVSIATAFAMLS<br>LGSK      | Deamidated(10)Oxidation(24)                                                        | 6.48  | 3      | 1071.9   |
| 568986620   | Clusterin                                                                               | 3        | MLNTSSLLEQLNDQFNWVSQLANL<br>TQGEDIK     | Deamidated(3)Deamidated(12)Dea<br>midated(23)Oxidation(1)                          | 3.93  | 3      | 1152.5   |
| 171846253   | Transmembrane glycoprotein<br>NMB                                                       | 6        | NLSDEIFLR                               | Deamidated(1)                                                                      | 2.42  | 2      | 554.3    |
| 46849812    | Fibronectin                                                                             | 10       | WTPLNSSTIIGYR                           | Deamidated(5)                                                                      | 3.14  | 2      | 754.9    |
| 124494256   | Prolow-density lipoprotein<br>receptor-related protein 1                                | 22       | WTGHNVTVVQR                             | Deamidated(5)                                                                      | 3.57  | 3      | 433.2    |
| 148747128   | dolichyl-<br>diphosphooligosaccharide--<br>protein glycosyltransferase<br>subunit STT3A | 1        | TILVDNNTWNNTHISR                        | Deamidated(10)                                                                     | 5.28  | 3      | 633.7    |
| 6755863     | Endoplasmic                                                                             | 3        | HNNDTQHIWESDSNEFSVIADPR                 | Deamidated(3)                                                                      | 5.79  | 4      | 678.8    |
| 121674797   | Palmitoyl-protein thioesterase<br>1                                                     | 2        | FFNDSIVDPVDSEWFGFYR                     | Deamidated(3)                                                                      | 3.17  | 2      | 1171.0   |
| 225007542   | Solute carrier family 15<br>member 3                                                    | 1        | LQYIAANQTVPQLIGK                        | Deamidated(7)                                                                      | 3.33  | 2      | 879.5    |
| 225543173   | Cartilage-associated protein                                                            | 2        | DKWGLSDEHFQPRPEAVQFFNVTT<br>LQK         | Deamidated(21)                                                                     | 6.17  | 4      | 805.4    |
| 569003077   | Cadherin-2                                                                              | 6        | RNWTINR                                 | Deamidated(2)                                                                      | 2.41  | 2      | 480.8    |
| 124486702   | Alpha-1B-glycoprotein                                                                   | 3        | FSLGAITSNNSGIYR                         | Deamidated(9)                                                                      | 2.77  | 2      | 800.9    |
| 755537859   | Solute carrier family 2,<br>facilitated glucose transporter<br>member 4                 | 1        | VIEQSYNATWLGR                           | Deamidated(7)                                                                      | 3.87  | 2      | 769.4    |
| 31542891    | Gamma-glutamyltransferase                                                               | 2        | LWDPSSHPGIQNISR                         | Deamidated(12)                                                                     | 3.41  | 3      | 570.0    |
| 7304875     | Alpha-2-HS-glycoprotein                                                                 | 2        | CPLLTPFNNTNVVHTVNTALAAFNT<br>QNGTYFK    | Carbamidomethyl(1)Deamidated(11)<br>Deamidated(17)Deamidated(27)Dea<br>midated(28) | 6.66  | 4      | 921.9    |
| 124486702   | Alpha-1B-glycoprotein                                                                   | 3        | GTAGFLIYKPGNYSCSYLTHAAGEP<br>SEPSDIVTIK | Carbamidomethyl(15)Deamidated(12<br>)                                              | 5.79  | 4      | 937.0    |
| 121583481   | Inhibitor of nuclear factor<br>kappa-B kinase-interacting<br>protein, isoform 1         | 1        | FQNITDFWK                               | Deamidated(3)                                                                      | 2.86  | 2      | 600.3    |
| 171846253   | Transmembrane glycoprotein<br>NMB                                                       | 6        | DLPIVFDVLIHDPHFNLNSAISYK                | Deamidated(18)                                                                     | 3.2   | 3      | 952.8    |
| 569003077   | Cadherin-2                                                                              | 6        | VDVIVANLTVTDKDPHTPAWNAAY<br>R           | Deamidated(22)                                                                     | 5.97  | 4      | 724.6    |

14 Supplemental Table S2

| MH+ [Da] | RT [min] | PSM | WT-1     | WT-2     | WT-3     | WT-4     | WT-5     | WT-5-2   | WT-6     | WT-7     | WT-8     | Null-1   | Null-2   |
|----------|----------|-----|----------|----------|----------|----------|----------|----------|----------|----------|----------|----------|----------|
| 1181.6   | 35.5     | 1   | 2.33E+04 | 2.09E+04 | 4.07E+04 | 9.01E+04 | 1.90E+04 | 5.18E+04 | 2.26E+04 | 2.04E+03 | 2.59E+05 | 1.88E+05 | 2.50E+04 |
| 2475.2   | 59.3     | 15  | 8.20E+03 | 0.00E+00 | 4.08E+03 | 2.38E+05 | 1.27E+04 | 4.46E+03 | 2.48E+03 | 9.92E+03 | 7.88E+04 | 1.19E+05 | 3.05E+04 |
| 1517.7   | 52.0     | 2   | 8.72E+04 | 7.04E+04 | 0.00E+00 | 1.05E+05 | 2.54E+04 | 0.00E+00 | 1.90E+04 | 3.18E+03 | 9.49E+04 | 1.32E+05 | 1.08E+05 |
| 1398.6   | 38.9     | 8   | 1.56E+04 | 1.44E+04 | 2.23E+03 | 2.27E+05 | 3.04E+04 | 2.72E+04 | 9.07E+03 | 1.00E+04 | 1.44E+05 | 1.62E+05 | 1.86E+04 |
| 3213.6   | 75.5     | 114 | 3.53E+05 | 3.77E+04 | 2.07E+03 | 1.75E+05 | 1.53E+04 | 4.30E+05 | 2.81E+03 | 4.18E+05 | 2.21E+04 | 4.90E+04 | 7.43E+05 |
| 3455.6   | 78.6     | 44  | 8.06E+03 | 1.84E+05 | 1.82E+03 | 1.54E+05 | 3.70E+04 | 1.92E+02 | 2.83E+03 | 1.72E+03 | 3.65E+04 | 2.02E+04 | 3.63E+04 |
| 1107.6   | 52.1     | 1   | 5.15E+04 | 1.02E+05 | 5.07E+04 | 2.91E+04 | 5.08E+04 | 5.95E+04 | 8.80E+04 | 8.48E+04 | 3.68E+04 | 6.03E+04 | 1.09E+05 |
| 1508.8   | 51.0     | 13  | 1.26E+05 | 1.95E+05 | 5.70E+04 | 1.01E+06 | 1.28E+05 | 9.95E+04 | 5.38E+04 | 7.21E+04 | 4.13E+05 | 8.35E+05 | 9.62E+04 |
| 1297.7   | 25.7     | 3   | 1.87E+04 | 1.38E+04 | 5.38E+03 | 1.42E+04 | 1.14E+04 | 1.37E+04 | 2.11E+04 | 9.69E+03 | 4.61E+04 | 4.43E+04 | 2.79E+04 |
| 1898.9   | 36.3     | 16  | 1.12E+05 | 4.35E+04 | 2.86E+04 | 3.23E+05 | 1.47E+05 | 9.33E+04 | 2.55E+04 | 4.20E+04 | 2.57E+05 | 3.25E+05 | 6.61E+04 |
| 2712.2   | 42.5     | 39  | 1.88E+05 | 1.71E+05 | 5.13E+04 | 8.47E+05 | 1.29E+05 | 7.51E+04 | 7.10E+04 | 7.16E+04 | 7.38E+05 | 4.26E+05 | 2.17E+05 |
| 2341.0   | 71.7     | 12  | 1.24E+04 | 5.71E+04 | 2.75E+04 | 3.52E+04 | 1.89E+04 | 1.46E+04 | 2.61E+03 | 2.66E+04 | 2.62E+04 | 5.18E+04 | 5.43E+04 |
| 1758.0   | 46.7     | 8   | 5.72E+05 | 3.78E+05 | 7.77E+05 | 2.17E+05 | 7.06E+05 | 1.44E+06 | 7.77E+05 | 5.65E+05 | 3.54E+05 | 3.63E+05 | 2.57E+06 |
| 3218.6   | 48.8     | 2   | 6.56E+03 | 2.13E+04 | 2.20E+04 | 7.66E+04 | 9.40E+03 | 6.68E+03 | 0.00E+00 | 1.53E+04 | 4.78E+04 | 2.81E+04 | 3.70E+04 |
| 960.5    | 25.3     | 2   | 5.00E+04 | 2.96E+04 | 3.49E+04 | 4.73E+03 | 7.33E+04 | 6.74E+04 | 3.56E+04 | 3.21E+04 | 7.12E+04 | 1.02E+05 | 4.01E+04 |
| 1600.8   | 45.8     | 10  | 2.38E+03 | 5.19E+03 | 0.00E+00 | 5.11E+03 | 9.39E+05 | 1.00E+06 | 8.32E+04 | 1.43E+05 | 3.11E+05 | 2.22E+03 | 7.19E+03 |
| 1537.8   | 41.6     | 8   | 6.39E+04 | 6.55E+04 | 1.37E+05 | 1.11E+05 | 1.04E+05 | 1.19E+05 | 4.78E+04 | 5.24E+04 | 1.85E+05 | 1.69E+05 | 1.52E+05 |
| 1707.8   | 36.9     | 10  | 1.02E+05 | 2.93E+04 | 7.09E+03 | 9.02E+04 | 1.81E+04 | 9.58E+03 | 3.12E+04 | 2.54E+04 | 1.05E+05 | 6.37E+04 | 6.95E+04 |
| 3684.8   | 67.6     | 127 | 5.44E+05 | 7.91E+04 | 1.77E+04 | 4.47E+05 | 5.48E+04 | 1.53E+05 | 3.00E+02 | 5.33E+04 | 6.20E+05 | 2.49E+05 | 8.56E+05 |
| 3744.8   | 48.0     | 4   | 1.54E+03 | 0.00E+00 | 0.00E+00 | 0.00E+00 | 8.20E+04 | 9.13E+04 | 4.38E+03 | 9.41E+03 | 2.24E+04 | 0.00E+00 | 0.00E+00 |
| 1199.6   | 51.9     | 7   | 1.88E+04 | 4.52E+04 | 5.12E+04 | 1.34E+05 | 7.07E+04 | 1.09E+05 | 2.61E+04 | 5.68E+04 | 6.65E+04 | 1.32E+05 | 5.48E+04 |
| 2856.5   | 68.5     | 286 | 1.75E+04 | 2.10E+06 | 4.43E+06 | 2.56E+03 | 2.04E+06 | 0.00E+00 | 1.27E+03 | 1.30E+04 | 0.00E+00 | 1.53E+03 | 8.23E+03 |
| 2895.5   | 44.7     | 6   | 2.29E+04 | 1.09E+04 | 1.40E+04 | 6.05E+04 | 3.02E+03 | 7.58E+03 | 7.66E+03 | 2.45E+04 | 1.09E+05 | 4.75E+04 | 3.53E+04 |

14 Supplemental Table S2

| Null-3   | Null-4   | Null-5   | Null-6   | Null-7   | Null-8   | Ratio<br>Null/WT | SD       | p value  | N Ratio | N SD     | N p value | Avg_WT   | Avg_Null |
|----------|----------|----------|----------|----------|----------|------------------|----------|----------|---------|----------|-----------|----------|----------|
| 1.99E+05 | 2.82E+05 | 3.15E+05 | 6.80E+05 | 1.87E+05 | 1.63E+04 | 4.02             | 8.96E+00 | 5.03E-02 | 4.05    | 1.07E+01 | 3.78E-02  | 4.44E+04 | 1.80E+05 |
| 1.61E+05 | 2.31E+05 | 8.42E+04 | 2.43E+05 | 1.09E+05 | 0.00E+00 | 3.07             | 8.21E+00 | 5.97E-02 | 3.89    | 9.60E+00 | 2.55E-02  | 2.45E+04 | 9.54E+04 |
| 1.59E+05 | 1.59E+05 | 1.42E+05 | 3.03E+05 | 1.40E+05 | 5.53E+03 | 3.19             | 4.92E+00 | 1.15E-02 | 3.76    | 6.15E+00 | 4.97E-03  | 2.93E+04 | 1.10E+05 |
| 1.08E+05 | 2.94E+05 | 1.66E+05 | 4.52E+05 | 1.75E+05 | 4.88E+03 | 3.24             | 7.49E+00 | 6.47E-02 | 3.75    | 8.66E+00 | 3.73E-02  | 3.50E+04 | 1.31E+05 |
| 1.46E+05 | 9.87E+04 | 1.50E+05 | 1.11E+06 | 2.59E+04 | 1.91E+06 | 3.27             | 8.01E+00 | 1.78E-01 | 3.74    | 9.00E+00 | 1.33E-01  | 9.64E+04 | 3.61E+05 |
| 2.76E+05 | 9.00E+04 | 7.05E+04 | 5.87E+05 | 4.15E+03 | 8.21E+03 | 2.89             | 8.60E+00 | 2.68E-01 | 3.66    | 1.04E+01 | 1.87E-01  | 2.80E+04 | 1.03E+05 |
| 1.02E+05 | 1.84E+05 | 1.14E+05 | 5.21E+05 | 3.63E+05 | 6.38E+04 | 3.09             | 3.94E+00 | 6.56E-02 | 3.66    | 4.55E+00 | 3.19E-02  | 3.70E+04 | 1.35E+05 |
| 1.20E+06 | 1.21E+06 | 2.91E+05 | 1.32E+06 | 4.21E+05 | 2.90E+04 | 2.83             | 5.86E+00 | 6.60E-02 | 3.65    | 7.39E+00 | 4.12E-02  | 1.47E+05 | 5.38E+05 |
| 6.08E+04 | 7.60E+04 | 3.44E+04 | 1.52E+05 | 4.27E+04 | 9.86E+03 | 3.27             | 4.81E+00 | 4.10E-02 | 3.62    | 6.61E+00 | 2.40E-02  | 1.17E+04 | 4.25E+04 |
| 3.27E+05 | 4.85E+05 | 3.32E+05 | 8.65E+05 | 3.67E+05 | 2.03E+04 | 2.93             | 4.80E+00 | 4.48E-02 | 3.52    | 6.20E+00 | 2.15E-02  | 7.55E+04 | 2.66E+05 |
| 5.06E+05 | 1.02E+06 | 9.69E+05 | 2.15E+06 | 9.81E+05 | 1.04E+05 | 3.06             | 6.12E+00 | 6.04E-02 | 3.36    | 7.13E+00 | 3.65E-02  | 1.76E+05 | 5.92E+05 |
| 7.64E+04 | 5.44E+04 | 3.90E+04 | 2.08E+05 | 3.17E+04 | 1.74E+04 | 2.71             | 4.16E+00 | 9.02E-02 | 3.29    | 4.94E+00 | 4.37E-02  | 1.53E+04 | 5.02E+04 |
| 4.71E+05 | 3.85E+06 | 1.40E+06 | 1.58E+06 | 1.10E+06 | 8.78E+05 | 2.38             | 3.14E+00 | 7.34E-02 | 3.13    | 3.97E+00 | 5.07E-02  | 3.66E+05 | 1.15E+06 |
| 7.51E+04 | 6.27E+04 | 6.38E+04 | 1.54E+05 | 5.46E+04 | 1.47E+03 | 2.61             | 4.77E+00 | 6.50E-02 | 3.05    | 5.54E+00 | 3.21E-02  | 1.48E+04 | 4.51E+04 |
| 9.17E+04 | 1.34E+05 | 1.36E+05 | 2.34E+05 | 1.02E+05 | 3.00E+04 | 2.45             | 2.71E+00 | 2.49E-02 | 3.03    | 3.73E+00 | 1.01E-02  | 2.75E+04 | 8.31E+04 |
| 3.09E+04 | 5.18E+03 | 7.44E+05 | 2.65E+06 | 8.38E+05 | 7.47E+05 | 2.27             | 6.58E+00 | 3.35E-01 | 2.77    | 7.51E+00 | 2.55E-01  | 1.54E+05 | 4.26E+05 |
| 1.77E+05 | 2.20E+05 | 3.12E+05 | 4.41E+05 | 2.74E+05 | 3.77E+04 | 2.26             | 2.28E+00 | 2.34E-02 | 2.71    | 3.44E+00 | 8.68E-03  | 6.21E+04 | 1.68E+05 |
| 9.77E+04 | 1.14E+05 | 1.30E+05 | 2.53E+05 | 1.32E+05 | 1.24E+04 | 2.34             | 3.57E+00 | 5.02E-02 | 2.65    | 4.36E+00 | 2.46E-02  | 3.09E+04 | 8.18E+04 |
| 6.15E+05 | 8.42E+05 | 5.34E+05 | 1.22E+05 | 6.92E+04 | 6.64E+05 | 2.26             | 3.96E+00 | 6.56E-02 | 2.56    | 5.11E+00 | 5.06E-02  | 1.50E+05 | 3.83E+05 |
| 5.32E+03 | 0.00E+00 | 4.63E+04 | 2.24E+05 | 7.04E+04 | 3.60E+04 | 2.03             | 6.41E+00 | 4.30E-01 | 2.54    | 7.49E+00 | 3.25E-01  | 1.27E+04 | 3.23E+04 |
| 1.32E+05 | 1.29E+05 | 8.81E+04 | 3.47E+05 | 8.72E+04 | 2.91E+04 | 1.94             | 2.64E+00 | 1.32E-01 | 2.52    | 3.16E+00 | 4.72E-02  | 3.78E+04 | 9.53E+04 |
| 1.61E+04 | 7.21E+03 | 1.54E+04 | 8.84E+06 | 4.26E+06 | 2.23E+06 | 2.01             | 6.67E+00 | 4.57E-01 | 2.49    | 8.31E+00 | 3.73E-01  | 5.03E+05 | 1.25E+06 |
| 7.59E+04 | 5.35E+04 | 1.11E+05 | 1.49E+05 | 8.13E+04 | 0.00E+00 | 2.40             | 4.47E+00 | 6.51E-02 | 2.46    | 5.41E+00 | 7.30E-02  | 2.15E+04 | 5.28E+04 |

14 Supplemental Table S2

| Accession # | Protein                                                   | # of Pep | PEPTIDE                          | Modification                                         | XCorr | Charge | m/z [Da] |
|-------------|-----------------------------------------------------------|----------|----------------------------------|------------------------------------------------------|-------|--------|----------|
| 14916479    | Cation-dependent mannose-6-phosphate receptor             | 2        | INETHIFNGSNWIMLIYK               | Deamidated(2)Deamidated(8)Oxidation(14)              | 4.68  | 3      | 737.7    |
| 568999476   | Receptor-type tyrosine-protein phosphatase S              | 1        | GFPQILGAAGNVSAGSVLLR             | Deamidated(11)                                       | 4.18  | 3      | 643.4    |
| 8850219     | Haptoglobin                                               | 2        | VVLHPNHSVVDIGLIK                 | Deamidated(6)                                        | 4.94  | 3      | 581.0    |
| 755495403   | Antithrombin-III                                          | 3        | LGACNDTLKQLMEVFKFDTISEK          | Carbamidomethyl(4)Deamidated(5)Oxidation(12)         | 3.18  | 4      | 676.8    |
| 568933000   | Platelet glycoprotein 4                                   | 5        | RPYIVPILWLNETGTIGDEKAEMFK        | Deamidated(11)Oxidation(23)                          | 5.43  | 4      | 735.1    |
| 568991244   | Collagen alpha-1(XIV) chain                               | 4        | VVDKGNKSKPTSPEEVK                | Deamidated(6)                                        | 4.8   | 2      | 886.5    |
| 568972029   | C-type mannose receptor 2                                 | 6        | ASNASKPGTLER                     | Deamidated(3)                                        | 3.09  | 2      | 616.3    |
| 568962784   | Laminin subunit beta-2                                    | 4        | AQAALDKANASR                     | Deamidated(9)                                        | 3.51  | 2      | 608.8    |
| 124486702   | Alpha-1B-glycoprotein                                     | 3        | LLFVGPPQHAGNYSCR                 | Carbamidomethyl(14)Deamidated(11)                    | 4.1   | 3      | 573.9    |
| 7305599     | Transthyretin                                             | 1        | TLGISPFHEFADVFTANDSGHR           | Deamidated(18)                                       | 3.31  | 4      | 630.3    |
| 147904569   | Carboxypeptidase N subunit 2                              | 3        | LQDLEITGSPVSNLSAHIFSNLSSLEK      | Deamidated(13)                                       | 6.55  | 3      | 967.5    |
| 31982712    | Carboxypeptidase B2                                       | 3        | IPFNVLMMNNVEDLIEQQTFNDTVSPR      | Deamidated(20)Oxidation(7)                           | 5.11  | 3      | 1017.8   |
| 226958497   | Serum amyloid P-component                                 | 1        | LIPHLEKPLQNFTLCFR                | Carbamidomethyl(15)Deamidated(11)                    | 4.29  | 3      | 709.7    |
| 147904569   | Carboxypeptidase N subunit 2                              | 3        | LSLDSNNLTALHPALFHNLRSR           | Deamidated(6)                                        | 5.84  | 4      | 584.6    |
| 219521935   | Histocompatibility 2, Q region locus 4                    | 2        | TLLSYYNQSAGGSHTIQVISGCEVGS DGR   | Carbamidomethyl(22)Deamidated(7)                     | 5.82  | 3      | 1019.8   |
| 133778978   | Cation-independent mannose-6-phosphate receptor           | 12       | SLSPHAGTEPCPPEAAVCLLNGSKPVNLGK   | Carbamidomethyl(11)Carbamidomethyl(18)Deamidated(21) | 5.47  | 4      | 776.1    |
| 31981720    | Protein Z-dependent protease inhibitor                    | 4        | ASQQLSNETSSFGFNLLR               | Deamidated(7)                                        | 5.88  | 2      | 1000.5   |
| 568956041   | Cadherin-13                                               | 6        | NLSVVILGASDK                     | Deamidated(1)                                        | 2.96  | 2      | 608.8    |
| 21389311    | Intercellular adhesion molecule 1                         | 2        | VVLLSGVEPRPPTPQVQFTLNASSE DHR    | Deamidated(21)                                       | 7.06  | 4      | 801.4    |
| 227499988   | Choline transporter-like protein 1                        | 1        | FAEINGSALCSYNIKPSEYTLTSK         | Carbamidomethyl(10)Deamidated(5)                     | 6.08  | 3      | 898.8    |
| 568994656   | Leukocyte surface antigen CD47                            | 3        | NSTTTDQNFSAK                     | Deamidated(1)Deamidated(8)                           | 2.68  | 2      | 708.8    |
| 31982171    | Murinoglobulin-1                                          | 4        | SLGNVNFVSVAEAQSSSEPCGSEVATVPETGR | Carbamidomethyl(20)Deamidated(6)                     | 6.72  | 3      | 1099.2   |
| 31982712    | Carboxypeptidase B2                                       | 3        | EVHFFVNASDVDSVK                  | Deamidated(7)                                        | 3.19  | 3      | 564.9    |
| 568990229   | Leukemia inhibitory factor receptor                       | 3        | KVPSNSTETVIESDQFQPGVR            | Deamidated(5)                                        | 5.73  | 3      | 773.7    |
| 568913156   | Prostaglandin-H2 D-Protein Z-dependent protease inhibitor | 1        | TVVAPSTEGGLNLTSTFLR              | Deamidated(12)                                       | 3.98  | 2      | 982.5    |
| 31981720    | Protein Z-dependent protease inhibitor                    | 4        | LPYQGNATMLVVLMEK                 | Deamidated(6)Oxidation(9)Oxidation(14)               | 5.04  | 2      | 920.5    |



| MH+ [Da] | RT [min] | PSM | WT-1     | WT-2     | WT-3     | WT-4     | WT-5     | WT-5-2   | WT-6     | WT-7     | WT-8     | Null-1   | Null-2   |
|----------|----------|-----|----------|----------|----------|----------|----------|----------|----------|----------|----------|----------|----------|
| 2211.1   | 62.6     | 18  | 2.81E+04 | 2.06E+05 | 2.93E+04 | 1.39E+05 | 5.86E+04 | 6.00E+04 | 3.98E+04 | 1.88E+05 | 7.34E+04 | 8.93E+04 | 2.24E+05 |
| 1928.1   | 58.9     | 1   | 1.11E+04 | 1.83E+04 | 3.63E+04 | 1.49E+04 | 4.54E+04 | 3.27E+04 | 3.98E+03 | 1.96E+04 | 8.49E+03 | 5.49E+03 | 1.84E+05 |
| 1741.0   | 39.6     | 31  | 3.34E+05 | 6.89E+05 | 5.41E+05 | 2.35E+05 | 4.06E+05 | 3.63E+05 | 2.00E+05 | 2.98E+05 | 4.03E+05 | 9.36E+05 | 1.15E+06 |
| 2704.3   | 56.1     | 26  | 2.16E+05 | 2.21E+05 | 6.05E+05 | 2.54E+05 | 2.94E+05 | 2.45E+05 | 1.18E+05 | 2.14E+05 | 5.50E+05 | 3.18E+05 | 1.19E+06 |
| 2937.5   | 54.5     | 5   | 4.27E+04 | 5.38E+04 | 1.19E+05 | 1.04E+05 | 1.56E+05 | 1.79E+05 | 2.65E+04 | 1.37E+05 | 9.57E+04 | 9.17E+04 | 1.31E+05 |
| 1771.9   | 18.5     | 19  | 2.34E+04 | 1.65E+05 | 3.99E+05 | 0.00E+00 | 8.81E+04 | 5.91E+04 | 4.38E+04 | 3.18E+05 | 8.18E+04 | 7.02E+04 | 2.96E+05 |
| 1231.6   | 18.3     | 33  | 1.13E+03 | 2.41E+05 | 2.67E+05 | 5.43E+02 | 2.99E+01 | 3.40E+01 | 3.56E+03 | 1.89E+05 | 8.04E+04 | 5.28E+04 | 1.83E+05 |
| 1216.6   | 18.6     | 38  | 3.31E+02 | 2.33E+05 | 4.77E+05 | 0.00E+00 | 1.50E+03 | 3.02E+01 | 3.84E+05 | 2.37E+05 | 9.96E+04 | 1.34E+05 | 3.37E+05 |
| 1719.8   | 34.5     | 9   | 1.85E+03 | 1.16E+04 | 7.39E+03 | 2.09E+03 | 3.57E+05 | 3.84E+05 | 4.55E+04 | 5.02E+04 | 8.29E+04 | 2.01E+03 | 5.09E+03 |
| 2518.2   | 53.7     | 15  | 1.09E+05 | 2.02E+05 | 2.24E+05 | 5.59E+04 | 2.53E+05 | 3.07E+05 | 1.55E+04 | 8.61E+04 | 3.71E+04 | 5.13E+04 | 3.60E+05 |
| 2900.5   | 64.0     | 29  | 7.45E+04 | 1.05E+05 | 1.95E+05 | 8.45E+04 | 1.59E+05 | 1.52E+05 | 7.31E+03 | 4.33E+04 | 5.62E+04 | 2.35E+04 | 1.76E+05 |
| 3051.5   | 66.4     | 49  | 9.82E+04 | 1.68E+05 | 1.65E+05 | 1.04E+05 | 1.54E+05 | 1.08E+05 | 7.76E+03 | 5.81E+04 | 1.19E+05 | 9.34E+04 | 2.50E+05 |
| 2127.1   | 48.5     | 18  | 8.44E+04 | 1.64E+05 | 3.82E+05 | 1.03E+05 | 3.90E+05 | 3.89E+05 | 9.72E+04 | 1.79E+05 | 4.46E+05 | 1.70E+05 | 5.63E+05 |
| 2335.2   | 49.5     | 36  | 1.34E+05 | 2.35E+05 | 3.09E+05 | 1.26E+05 | 3.91E+05 | 4.07E+05 | 4.28E+04 | 8.25E+04 | 2.42E+05 | 1.82E+05 | 4.83E+05 |
| 3057.4   | 44.8     | 12  | 1.00E+05 | 1.71E+05 | 2.04E+05 | 6.07E+04 | 2.71E+05 | 2.57E+05 | 7.04E+04 | 9.97E+04 | 1.09E+05 | 1.02E+05 | 3.25E+05 |
| 3101.5   | 42.9     | 9   | 3.44E+05 | 3.75E+05 | 5.93E+05 | 2.54E+05 | 5.00E+05 | 4.32E+05 | 6.08E+05 | 9.00E+05 | 8.98E+05 | 4.08E+05 | 1.08E+06 |
| 2000.0   | 53.4     | 53  | 5.46E+05 | 1.16E+06 | 1.62E+06 | 6.82E+05 | 1.71E+06 | 1.36E+06 | 4.98E+05 | 4.17E+05 | 1.06E+06 | 9.78E+05 | 2.22E+06 |
| 1216.7   | 50.2     | 7   | 7.20E+04 | 9.59E+04 | 1.59E+05 | 4.36E+04 | 2.73E+05 | 2.31E+05 | 7.71E+04 | 1.80E+05 | 1.10E+05 | 9.08E+04 | 4.35E+05 |
| 3202.7   | 43.5     | 24  | 4.90E+05 | 3.54E+05 | 7.40E+05 | 3.33E+05 | 1.16E+06 | 9.65E+05 | 2.28E+05 | 5.79E+05 | 9.15E+05 | 7.60E+05 | 1.18E+06 |
| 2694.3   | 45.8     | 15  | 1.66E+05 | 1.64E+05 | 4.18E+05 | 9.45E+04 | 3.59E+05 | 2.80E+05 | 8.07E+04 | 1.52E+05 | 2.96E+05 | 1.80E+05 | 3.48E+05 |
| 1416.6   | 22.4     | 11  | 1.34E+05 | 5.78E+04 | 1.57E+05 | 0.00E+00 | 2.45E+05 | 1.31E+05 | 7.19E+04 | 9.79E+04 | 1.48E+05 | 1.25E+05 | 2.11E+05 |
| 3295.5   | 44.7     | 10  | 7.73E+04 | 2.20E+05 | 3.26E+05 | 8.59E+04 | 1.50E+05 | 2.56E+05 | 2.41E+04 | 5.07E+04 | 1.07E+05 | 9.94E+04 | 4.76E+05 |
| 1692.8   | 42.4     | 10  | 1.81E+05 | 2.72E+05 | 2.93E+05 | 1.94E+05 | 3.23E+05 | 3.10E+05 | 6.94E+04 | 1.43E+05 | 2.07E+05 | 1.87E+05 | 4.32E+05 |
| 2319.2   | 34.5     | 9   | 9.90E+04 | 1.16E+05 | 9.17E+04 | 4.60E+04 | 2.19E+05 | 1.90E+05 | 2.60E+04 | 2.18E+04 | 4.14E+04 | 1.10E+05 | 1.43E+05 |
| 1964.0   | 54.1     | 6   | 5.35E+04 | 9.70E+04 | 1.02E+05 | 1.34E+04 | 1.38E+05 | 1.46E+05 | 3.92E+04 | 3.49E+04 | 6.75E+04 | 8.75E+04 | 8.48E+04 |
| 1839.9   | 45.8     | 42  | 5.11E+05 | 1.08E+06 | 1.28E+06 | 6.32E+05 | 1.23E+06 | 1.17E+06 | 6.64E+05 | 3.93E+05 | 8.91E+05 | 8.33E+05 | 1.61E+06 |

14 Supplemental Table S2

| Null-3   | Null-4   | Null-5   | Null-6   | Null-7   | Null-8   | Ratio<br>Null/WT | SD       | p value  | N Ratio | N SD     | N p value | Avg_WT   | Avg_Null |
|----------|----------|----------|----------|----------|----------|------------------|----------|----------|---------|----------|-----------|----------|----------|
| 1.74E+05 | 1.38E+05 | 1.23E+05 | 5.57E+05 | 1.61E+05 | 3.97E+04 | 2.06             | 3.29E+00 | 1.44E-01 | 2.40    | 3.81E+00 | 7.11E-02  | 5.78E+04 | 1.39E+05 |
| 8.62E+03 | 1.03E+04 | 2.03E+04 | 2.68E+04 | 3.36E+04 | 2.11E+04 | 1.83             | 4.01E+00 | 4.39E-01 | 2.37    | 4.86E+00 | 3.24E-01  | 1.17E+04 | 2.78E+04 |
| 8.12E+05 | 7.66E+05 | 3.61E+05 | 4.60E+05 | 3.19E+05 | 8.90E+05 | 1.85             | 1.51E+00 | 1.93E-02 | 2.36    | 2.27E+00 | 1.01E-02  | 2.34E+05 | 5.52E+05 |
| 1.00E+06 | 1.87E+05 | 2.70E+05 | 4.51E+05 | 7.29E+05 | 3.49E+05 | 1.87             | 2.24E+00 | 9.82E-02 | 2.22    | 3.28E+00 | 6.92E-02  | 1.92E+05 | 4.25E+05 |
| 1.40E+05 | 1.40E+05 | 1.36E+05 | 5.31E+05 | 1.83E+05 | 1.02E+05 | 1.79             | 2.34E+00 | 1.69E-01 | 2.21    | 2.70E+00 | 6.29E-02  | 6.01E+04 | 1.33E+05 |
| 6.98E+04 | 1.67E+05 | 2.34E+05 | 4.47E+05 | 3.17E+05 | 4.12E+05 | 1.93             | 3.13E+00 | 9.84E-02 | 2.18    | 3.36E+00 | 3.55E-02  | 8.16E+04 | 1.78E+05 |
| 7.26E+04 | 1.32E+05 | 1.72E+05 | 3.07E+05 | 2.03E+05 | 2.65E+05 | 1.99             | 3.62E+00 | 9.80E-02 | 2.18    | 3.55E+00 | 3.82E-02  | 5.70E+04 | 1.24E+05 |
| 2.16E+05 | 1.93E+05 | 2.70E+05 | 5.54E+05 | 2.55E+05 | 3.18E+05 | 1.79             | 2.85E+00 | 1.20E-01 | 2.14    | 2.98E+00 | 2.06E-02  | 9.74E+04 | 2.09E+05 |
| 1.03E+03 | 2.16E+03 | 2.11E+05 | 6.22E+05 | 2.70E+05 | 2.79E+05 | 1.66             | 4.53E+00 | 4.71E-01 | 2.09    | 5.28E+00 | 3.10E-01  | 5.64E+04 | 1.18E+05 |
| 1.57E+05 | 2.15E+05 | 1.77E+05 | 2.73E+05 | 1.57E+05 | 4.05E+05 | 1.57             | 1.96E+00 | 1.55E-01 | 2.08    | 2.25E+00 | 1.67E-02  | 7.84E+04 | 1.63E+05 |
| 9.99E+04 | 6.63E+04 | 1.60E+05 | 2.51E+05 | 1.26E+05 | 3.68E+05 | 1.63             | 2.14E+00 | 1.89E-01 | 2.08    | 2.31E+00 | 4.76E-02  | 5.44E+04 | 1.13E+05 |
| 1.80E+05 | 1.09E+05 | 1.13E+05 | 1.77E+05 | 1.25E+05 | 4.32E+05 | 1.70             | 1.84E+00 | 1.12E-01 | 2.07    | 2.14E+00 | 2.47E-02  | 6.50E+04 | 1.35E+05 |
| 5.77E+05 | 1.49E+05 | 2.87E+05 | 5.05E+05 | 2.47E+05 | 9.23E+05 | 1.72             | 2.10E+00 | 1.19E-01 | 2.02    | 2.76E+00 | 5.47E-02  | 1.55E+05 | 3.14E+05 |
| 3.48E+05 | 2.04E+05 | 3.39E+05 | 4.11E+05 | 2.99E+05 | 5.17E+05 | 1.59             | 1.51E+00 | 5.22E-02 | 2.02    | 1.76E+00 | 2.55E-03  | 1.27E+05 | 2.58E+05 |
| 2.45E+05 | 1.68E+05 | 1.95E+05 | 2.27E+05 | 2.14E+05 | 3.98E+05 | 1.57             | 1.45E+00 | 6.19E-02 | 2.02    | 1.52E+00 | 2.72E-03  | 8.54E+04 | 1.73E+05 |
| 4.22E+05 | 1.75E+06 | 1.65E+06 | 4.87E+05 | 9.94E+05 | 7.52E+05 | 1.73             | 1.71E+00 | 8.03E-02 | 2.01    | 2.69E+00 | 6.63E-02  | 3.55E+05 | 7.16E+05 |
| 1.78E+06 | 1.02E+06 | 1.22E+06 | 1.54E+06 | 1.19E+06 | 2.64E+06 | 1.56             | 1.36E+00 | 5.37E-02 | 2.00    | 1.63E+00 | 3.79E-03  | 5.86E+05 | 1.17E+06 |
| 1.13E+05 | 1.86E+05 | 2.10E+05 | 2.60E+05 | 3.02E+05 | 1.56E+05 | 1.59             | 1.71E+00 | 1.13E-01 | 1.98    | 1.92E+00 | 2.02E-02  | 8.08E+04 | 1.60E+05 |
| 1.09E+06 | 7.23E+05 | 1.18E+06 | 1.74E+06 | 9.88E+05 | 4.60E+05 | 1.59             | 1.41E+00 | 4.90E-02 | 1.98    | 1.93E+00 | 9.31E-03  | 3.90E+05 | 7.70E+05 |
| 1.49E+05 | 2.34E+05 | 6.98E+05 | 7.17E+05 | 2.40E+05 | 2.39E+05 | 1.57             | 1.86E+00 | 1.85E-01 | 1.94    | 2.42E+00 | 8.05E-02  | 1.35E+05 | 2.62E+05 |
| 2.08E+05 | 1.14E+05 | 2.18E+05 | 2.80E+05 | 1.59E+05 | 1.03E+05 | 1.53             | 1.46E+00 | 7.40E-02 | 1.94    | 1.88E+00 | 1.05E-02  | 6.95E+04 | 1.35E+05 |
| 2.27E+05 | 1.68E+05 | 1.32E+05 | 1.78E+05 | 1.06E+05 | 3.14E+05 | 1.48             | 1.93E+00 | 2.46E-01 | 1.92    | 2.32E+00 | 5.87E-02  | 8.26E+04 | 1.58E+05 |
| 3.17E+05 | 2.27E+05 | 2.61E+05 | 3.00E+05 | 2.53E+05 | 7.14E+05 | 1.52             | 1.35E+00 | 1.12E-01 | 1.91    | 1.49E+00 | 1.24E-02  | 1.30E+05 | 2.47E+05 |
| 6.76E+04 | 1.00E+05 | 1.10E+05 | 1.41E+05 | 1.32E+05 | 2.56E+05 | 1.40             | 1.64E+00 | 2.37E-01 | 1.89    | 1.75E+00 | 7.79E-03  | 5.13E+04 | 9.70E+04 |
| 1.19E+05 | 9.09E+04 | 1.13E+05 | 1.51E+05 | 9.55E+04 | 1.46E+05 | 1.44             | 1.22E+00 | 8.26E-02 | 1.89    | 1.40E+00 | 1.45E-03  | 4.43E+04 | 8.36E+04 |
| 1.57E+06 | 7.84E+05 | 9.72E+05 | 1.16E+06 | 1.02E+06 | 2.13E+06 | 1.45             | 1.09E+00 | 7.37E-02 | 1.84    | 1.38E+00 | 6.66E-03  | 5.12E+05 | 9.42E+05 |

14 Supplemental Table S2

| Accession # | Protein                                      | # of Pep | PEPTIDE                                 | Modification                                           | XCorr | Charge | m/z [Da] |
|-------------|----------------------------------------------|----------|-----------------------------------------|--------------------------------------------------------|-------|--------|----------|
| 568971816   | Intercellular adhesion molecule 2            | 6        | ETLKNQTFGGAETVPQEATATFNST<br>ALKK       | Deamidated(5)Deamidated(23)                            | 5.2   | 4      | 771.9    |
| 569006892   | Very low-density lipoprotein receptor        | 1        | DINTTDILR                               | Deamidated(3)                                          | 2.66  | 2      | 531.3    |
| 147904569   | Carboxypeptidase N subunit 2                 | 3        | LQLLNLSR                                | Deamidated(5)                                          | 2.43  | 2      | 479.3    |
| 31981720    | Protein Z-dependent protease inhibitor       | 4        | EGNFTSTFDK                              | Deamidated(3)                                          | 2.78  | 2      | 573.8    |
| 755495403   | Antithrombin-III                             | 3        | SLTFNESYQDVSEVVYGA                      | Deamidated(5)                                          | 4.74  | 3      | 713.0    |
| 568915555   | Integrin alpha V                             | 4        | IKTPEKNDTAAAGQGER                       | Deamidated(7)                                          | 4.72  | 3      | 596.3    |
| 568939471   | Serum paraoxonase/arylesterase 1             | 2        | ITVVYAENGTVLQGTTVASVYK                  | Deamidated(8)                                          | 4.91  | 2      | 1157.6   |
| 226874935   | Inter-alpha trypsin inhibitor, heavy chain 2 | 1        | GAFISNFTMTVNGMTFTSSIK                   | Deamidated(6)Deamidated(12)Oxidation(9)Oxidation(14)   | 3.61  | 2      | 1144.5   |
| 755528177   | Macrophage metalloelastase                   | 1        | LQEMQQFFGLEATGQLDNSTLAIM<br>HIPR        | Deamidated(18)Oxidation(4)Oxidation(24)                | 8.47  | 3      | 1074.5   |
| 158635948   | N-acetylmuramoyl-L-alanine amidase           | 1        | LEPEHLQLQNISQEQLAQVATLTK                | Deamidated(10)                                         | 7.68  | 3      | 935.2    |
| 244791354   | Phosphatidylcholine-sterol acyltransferase   | 2        | AELSNHTRPVILVPGCLGNR                    | Carbamidomethyl(16)Deamidated(5)                       | 4.65  | 4      | 551.8    |
| 148747546   | Serine protease inhibitor A3K                | 4        | NLINDYVSNQTQGMK                         | Deamidated(4)Deamidated(9)Oxidation(14)                | 3.71  | 2      | 928.4    |
| 6678085     | Alpha-1-antitrypsin 1-4                      | 2        | GDTHTQILEGLQFNLTQTSEADIHK               | Deamidated(14)                                         | 7.78  | 4      | 700.1    |
| 568915857   | Phospholipid transfer protein                | 4        | FQIYSNQSALSLALIPLQAPLK                  | Deamidated(6)                                          | 6.48  | 3      | 849.1    |
| 160358825   | Beta-2-glycoprotein 1                        | 3        | DYRPSAGNNSLYQDTVVFK                     | Deamidated(8)                                          | 5.66  | 3      | 725.7    |
| 755509347   | Mannan-binding lectin serine protease 2      | 2        | GDSGGALVFLDNETQR                        | Deamidated(12)                                         | 3.89  | 2      | 840.4    |
| 755470204   | H-2 class I histocompatibility antigen       | 1        | EQNYTCHVYHEGLPEPLTLR                    | Carbamidomethyl(6)Deamidated(3)                        | 5.83  | 3      | 819.7    |
| 244791354   | Phosphatidylcholine-sterol acyltransferase   | 2        | QSQPVHLLPMNETDHLNMVFSNK                 | Deamidated(11)Deamidated(22)Oxidation(10)Oxidation(18) | 4.18  | 4      | 679.1    |
| 31982171    | Murinoglobulin-1                             | 4        | YLNQQLTQK                               | Deamidated(3)                                          | 3.09  | 2      | 683.8    |
| 31982171    | Murinoglobulin-1                             | 4        | NYEVQLFHVNATVTEEGTGLEFSR                | Deamidated(10)                                         | 4.09  | 3      | 914.4    |
| 156616286   | Collagen alpha-6(VI) chain                   | 11       | EANQTQLR                                | Deamidated(3)                                          | 2.47  | 2      | 480.7    |
| 75677587    | Growth differentiation factor 3              | 1        | VLYFNLSAIK                              | Deamidated(5)                                          | 2.49  | 2      | 584.8    |
| 19527214    | Apolipoprotein N                             | 1        | TQNGSLPAVTR                             | Deamidated(3)                                          | 2.91  | 2      | 572.8    |
| 109627652   | Complement factor H                          | 2        | LTEFTHNSTMDYK                           | Deamidated(7)Oxidation(10)                             | 4.45  | 2      | 802.4    |
| 113865991   | LPS-binding protein                          | 1        | VYHQAGYLNFSITDDMLPHDSGIR                | Deamidated(9)Oxidation(16)                             | 4.68  | 3      | 922.8    |
| 568956041   | Cadherin-13                                  | 6        | NLSVVILGASDKDLHPNTDPFK                  | Deamidated(1)                                          | 6.03  | 3      | 794.4    |
| 19527130    | EMILIN-1                                     | 7        | ESNSTSLTQAALLEK                         | Deamidated(3)                                          | 4.35  | 2      | 796.9    |
| 21687214    | Sphingosine 1-phosphate receptor 1           | 1        | HNYTGK                                  | Deamidated(3)                                          | 2.69  | 2      | 442.2    |
| 13507644    | Carboxypeptidase N catalytic chain           | 2        | GMVLDENSNLGTGAVISVTGINHDV<br>TSGEHGDYFR | Deamidated(10)Oxidation(2)                             | 8.49  | 4      | 934.7    |

14 Supplemental Table S2

| MH+ [Da] | RT [min] | PSM | WT-1     | WT-2     | WT-3     | WT-4     | WT-5     | WT-5-2   | WT-6     | WT-7     | WT-8     | Null-1   | Null-2   |
|----------|----------|-----|----------|----------|----------|----------|----------|----------|----------|----------|----------|----------|----------|
| 3084.5   | 41.5     | 13  | 4.53E+05 | 4.92E+05 | 6.12E+05 | 3.50E+05 | 8.78E+05 | 8.17E+05 | 4.95E+05 | 8.10E+05 | 7.56E+05 | 4.86E+05 | 9.35E+05 |
| 1061.6   | 41.0     | 6   | 4.88E+04 | 3.95E+04 | 1.20E+05 | 2.39E+04 | 1.33E+05 | 1.15E+05 | 4.33E+04 | 7.81E+04 | 5.61E+04 | 6.18E+04 | 1.33E+05 |
| 957.6    | 44.7     | 1   | 1.06E+05 | 1.48E+05 | 1.75E+05 | 5.27E+04 | 2.77E+05 | 2.91E+05 | 8.09E+04 | 5.08E+04 | 1.61E+05 | 1.07E+05 | 2.35E+05 |
| 1146.5   | 32.5     | 11  | 2.58E+05 | 4.83E+05 | 6.52E+05 | 2.87E+05 | 5.92E+05 | 6.06E+05 | 4.54E+05 | 1.46E+05 | 4.63E+05 | 3.62E+05 | 7.57E+05 |
| 2137.0   | 53.8     | 85  | 3.58E+05 | 1.53E+06 | 1.30E+06 | 3.74E+05 | 1.81E+06 | 1.68E+06 | 1.19E+05 | 2.17E+05 | 3.40E+05 | 3.33E+05 | 7.62E+05 |
| 1786.9   | 17.7     | 31  | 0.00E+00 | 5.85E+05 | 6.08E+05 | 0.00E+00 | 4.48E+03 | 0.00E+00 | 2.28E+02 | 3.98E+05 | 1.40E+05 | 9.84E+04 | 2.50E+05 |
| 2314.2   | 48.8     | 20  | 9.53E+04 | 1.09E+05 | 1.96E+05 | 1.05E+05 | 3.62E+05 | 3.03E+05 | 1.97E+04 | 7.60E+04 | 1.75E+05 | 5.69E+04 | 2.59E+05 |
| 2288.1   | 53.8     | 51  | 1.04E+06 | 1.64E+05 | 1.28E+06 | 7.39E+05 | 3.03E+06 | 2.85E+06 | 2.28E+05 | 1.29E+06 | 1.32E+06 | 2.06E+06 | 2.34E+06 |
| 3221.6   | 53.6     | 10  | 6.43E+04 | 1.40E+05 | 2.28E+05 | 4.66E+04 | 2.70E+05 | 2.08E+05 | 4.60E+03 | 2.91E+04 | 6.66E+04 | 4.83E+04 | 1.61E+05 |
| 2803.5   | 53.6     | 6   | 9.40E+04 | 2.59E+05 | 2.03E+05 | 7.20E+04 | 1.43E+05 | 1.46E+05 | 3.65E+04 | 4.16E+04 | 9.81E+04 | 5.73E+04 | 2.15E+05 |
| 2204.2   | 36.8     | 14  | 5.64E+04 | 1.94E+05 | 1.52E+05 | 4.40E+04 | 3.77E+05 | 3.39E+05 | 6.60E+04 | 3.21E+04 | 1.88E+05 | 1.23E+05 | 2.86E+05 |
| 1855.9   | 38.1     | 90  | 3.37E+05 | 8.75E+05 | 6.25E+05 | 3.43E+05 | 8.27E+05 | 8.26E+05 | 1.88E+05 | 1.93E+05 | 6.04E+05 | 2.64E+05 | 9.17E+05 |
| 2797.4   | 47.8     | 755 | 4.39E+04 | 1.19E+05 | 1.33E+05 | 8.11E+04 | 1.11E+05 | 1.63E+05 | 1.97E+04 | 5.29E+04 | 9.30E+04 | 4.14E+04 | 2.52E+05 |
| 2545.4   | 69.9     | 48  | 4.06E+05 | 5.46E+05 | 1.25E+06 | 2.64E+05 | 1.23E+06 | 9.75E+05 | 8.58E+04 | 4.95E+05 | 3.38E+05 | 1.30E+05 | 1.22E+06 |
| 2175.0   | 42.2     | 85  | 3.75E+06 | 3.72E+06 | 4.58E+06 | 1.89E+06 | 6.71E+06 | 5.92E+06 | 2.66E+06 | 2.05E+06 | 3.04E+06 | 3.02E+06 | 5.08E+06 |
| 1679.8   | 47.1     | 19  | 2.41E+05 | 5.07E+05 | 5.22E+05 | 3.05E+05 | 5.56E+05 | 6.08E+05 | 3.08E+05 | 2.54E+05 | 4.32E+05 | 3.04E+05 | 7.13E+05 |
| 2457.1   | 38.5     | 12  | 3.04E+05 | 5.44E+05 | 7.32E+05 | 2.40E+05 | 6.93E+05 | 6.87E+05 | 1.20E+05 | 1.22E+05 | 3.00E+05 | 2.73E+05 | 9.13E+05 |
| 2713.3   | 40.5     | 3   | 3.27E+04 | 6.35E+04 | 8.01E+04 | 2.71E+04 | 1.88E+05 | 1.71E+05 | 1.71E+04 | 1.26E+04 | 1.03E+05 | 7.02E+04 | 1.27E+05 |
| 1366.7   | 28.7     | 18  | 1.33E+06 | 2.62E+06 | 2.62E+06 | 1.28E+06 | 2.55E+06 | 2.38E+06 | 1.28E+06 | 5.75E+05 | 1.48E+06 | 1.58E+06 | 2.78E+06 |
| 2741.3   | 52.6     | 21  | 1.68E+05 | 4.97E+05 | 6.60E+05 | 2.60E+05 | 3.74E+05 | 3.17E+05 | 4.89E+04 | 1.14E+05 | 2.00E+05 | 1.01E+05 | 4.37E+05 |
| 960.5    | 17.2     | 1   | 5.22E+05 | 1.24E+05 | 6.14E+05 | 0.00E+00 | 9.21E+05 | 0.00E+00 | 3.12E+05 | 5.86E+05 | 2.99E+05 | 2.77E+05 | 7.45E+05 |
| 1168.7   | 52.9     | 1   | 8.11E+03 | 2.41E+04 | 1.83E+04 | 4.30E+03 | 1.23E+05 | 7.88E+04 | 9.68E+03 | 2.67E+04 | 1.10E+04 | 8.61E+02 | 3.45E+04 |
| 1144.6   | 27.1     | 11  | 1.01E+05 | 1.31E+05 | 1.71E+05 | 1.76E+04 | 2.20E+05 | 1.67E+05 | 7.74E+04 | 5.17E+04 | 9.85E+04 | 1.02E+05 | 1.82E+05 |
| 1603.7   | 25.2     | 39  | 1.37E+06 | 1.25E+06 | 1.96E+06 | 9.41E+03 | 3.28E+06 | 2.71E+06 | 1.43E+06 | 7.82E+05 | 1.89E+06 | 1.16E+06 | 2.07E+06 |
| 2766.3   | 44.0     | 27  | 2.75E+05 | 5.75E+05 | 6.70E+05 | 1.71E+05 | 5.30E+05 | 5.58E+05 | 1.37E+05 | 1.88E+05 | 5.49E+05 | 2.60E+05 | 5.63E+05 |
| 2381.2   | 49.4     | 22  | 2.97E+05 | 3.29E+05 | 6.96E+05 | 2.03E+05 | 8.73E+05 | 6.36E+05 | 1.23E+05 | 5.49E+05 | 3.46E+05 | 2.94E+05 | 7.91E+05 |
| 1592.8   | 39.1     | 65  | 2.72E+05 | 3.08E+05 | 4.54E+05 | 1.93E+05 | 7.80E+05 | 6.80E+05 | 2.54E+05 | 2.87E+05 | 4.50E+05 | 4.30E+05 | 5.53E+05 |
| 883.4    | 17.2     | 6   | 3.00E+04 | 5.39E+04 | 9.49E+04 | 1.01E+02 | 1.65E+05 | 1.66E+02 | 1.99E+04 | 8.04E+04 | 4.13E+04 | 2.96E+04 | 8.20E+04 |
| 3735.7   | 50.3     | 21  | 1.79E+05 | 3.27E+05 | 3.35E+05 | 1.69E+05 | 5.25E+05 | 4.77E+05 | 6.05E+04 | 1.75E+05 | 1.77E+05 | 1.46E+05 | 5.04E+05 |

14 Supplemental Table S2

| Null-3   | Null-4   | Null-5   | Null-6   | Null-7   | Null-8   | Ratio<br>Null/WT | SD       | p value  | N Ratio | N SD     | N p value | Avg_WT   | Avg_Null |
|----------|----------|----------|----------|----------|----------|------------------|----------|----------|---------|----------|-----------|----------|----------|
| 5.51E+05 | 1.11E+06 | 1.27E+06 | 9.26E+05 | 1.80E+06 | 5.89E+05 | 1.52             | 1.16E+00 | 8.11E-02 | 1.83    | 1.60E+00 | 1.71E-02  | 3.86E+05 | 7.08E+05 |
| 1.03E+05 | 6.86E+04 | 1.20E+05 | 1.13E+05 | 1.12E+05 | 1.07E+05 | 1.40             | 1.10E+00 | 8.92E-02 | 1.81    | 1.25E+00 | 1.56E-03  | 4.22E+04 | 7.65E+04 |
| 1.74E+05 | 1.39E+05 | 2.43E+05 | 2.86E+05 | 1.65E+05 | 3.46E+05 | 1.42             | 1.38E+00 | 1.46E-01 | 1.81    | 1.55E+00 | 8.59E-03  | 8.65E+04 | 1.56E+05 |
| 6.24E+05 | 4.50E+05 | 4.93E+05 | 5.64E+05 | 5.86E+05 | 1.13E+06 | 1.42             | 1.10E+00 | 9.68E-02 | 1.79    | 1.30E+00 | 4.84E-03  | 2.56E+05 | 4.58E+05 |
| 7.07E+05 | 1.34E+06 | 1.58E+06 | 1.49E+06 | 5.72E+05 | 2.31E+06 | 1.33             | 1.85E+00 | 4.11E-01 | 1.79    | 2.24E+00 | 7.68E-02  | 4.68E+05 | 8.36E+05 |
| 1.60E+05 | 2.48E+05 | 2.85E+05 | 5.20E+05 | 4.23E+05 | 4.97E+05 | 1.61             | 3.00E+00 | 2.77E-01 | 1.78    | 2.96E+00 | 1.35E-01  | 1.24E+05 | 2.22E+05 |
| 1.20E+05 | 1.13E+05 | 2.21E+05 | 3.86E+05 | 2.27E+05 | 4.58E+05 | 1.44             | 1.86E+00 | 2.72E-01 | 1.78    | 2.00E+00 | 6.08E-02  | 9.20E+04 | 1.64E+05 |
| 1.23E+06 | 1.31E+06 | 2.16E+06 | 2.64E+06 | 2.13E+06 | 3.03E+05 | 1.34             | 1.60E+00 | 3.17E-01 | 1.77    | 1.95E+00 | 4.29E-02  | 7.64E+05 | 1.35E+06 |
| 7.23E+04 | 9.95E+04 | 9.97E+04 | 2.57E+05 | 2.52E+05 | 3.03E+05 | 1.38             | 1.96E+00 | 3.63E-01 | 1.77    | 2.08E+00 | 6.25E-02  | 6.42E+04 | 1.14E+05 |
| 1.48E+05 | 1.23E+05 | 1.80E+05 | 2.33E+05 | 1.48E+05 | 2.66E+05 | 1.41             | 1.41E+00 | 1.64E-01 | 1.77    | 1.67E+00 | 1.77E-02  | 7.11E+04 | 1.26E+05 |
| 1.18E+05 | 1.36E+05 | 2.13E+05 | 2.28E+05 | 1.90E+05 | 5.11E+05 | 1.40             | 1.91E+00 | 3.16E-01 | 1.76    | 2.10E+00 | 6.27E-02  | 9.28E+04 | 1.63E+05 |
| 5.32E+05 | 7.78E+05 | 5.84E+05 | 9.56E+05 | 7.11E+05 | 1.38E+06 | 1.43             | 1.36E+00 | 1.47E-01 | 1.75    | 1.59E+00 | 1.78E-02  | 3.17E+05 | 5.56E+05 |
| 1.29E+05 | 1.05E+05 | 9.00E+04 | 1.40E+05 | 4.75E+04 | 2.07E+05 | 1.39             | 1.52E+00 | 2.59E-01 | 1.75    | 1.82E+00 | 6.80E-02  | 5.35E+04 | 9.36E+04 |
| 3.67E+05 | 4.89E+05 | 7.09E+05 | 1.24E+06 | 1.10E+06 | 1.64E+06 | 1.39             | 1.79E+00 | 3.17E-01 | 1.74    | 1.86E+00 | 6.61E-02  | 3.48E+05 | 6.07E+05 |
| 5.80E+06 | 3.45E+06 | 5.12E+06 | 6.65E+06 | 4.42E+06 | 6.81E+06 | 1.32             | 9.39E-01 | 1.16E-01 | 1.73    | 1.01E+00 | 1.74E-03  | 2.18E+06 | 3.77E+06 |
| 5.32E+05 | 5.59E+05 | 5.86E+05 | 6.26E+05 | 5.49E+05 | 6.49E+05 | 1.36             | 7.52E-01 | 3.20E-02 | 1.72    | 9.82E-01 | 7.59E-04  | 2.46E+05 | 4.22E+05 |
| 6.25E+05 | 5.56E+05 | 3.52E+05 | 2.93E+05 | 3.62E+05 | 9.35E+05 | 1.30             | 1.42E+00 | 3.46E-01 | 1.72    | 1.68E+00 | 4.88E-02  | 2.35E+05 | 4.03E+05 |
| 9.26E+04 | 4.60E+04 | 1.22E+05 | 9.38E+04 | 8.42E+04 | 1.90E+05 | 1.34             | 1.70E+00 | 3.47E-01 | 1.71    | 2.01E+00 | 5.91E-02  | 4.48E+04 | 7.66E+04 |
| 2.76E+06 | 2.04E+06 | 2.13E+06 | 2.54E+06 | 1.33E+06 | 3.46E+06 | 1.30             | 9.40E-01 | 1.49E-01 | 1.70    | 1.17E+00 | 5.95E-03  | 1.03E+06 | 1.76E+06 |
| 4.33E+05 | 3.15E+05 | 3.48E+05 | 5.10E+05 | 2.95E+05 | 6.66E+05 | 1.32             | 1.44E+00 | 2.95E-01 | 1.70    | 1.69E+00 | 3.71E-02  | 1.68E+05 | 2.85E+05 |
| 3.74E+05 | 3.55E+05 | 5.96E+05 | 7.90E+05 | 3.70E+05 | 5.67E+05 | 1.36             | 1.64E+00 | 3.00E-01 | 1.70    | 1.83E+00 | 4.49E-02  | 2.23E+05 | 3.78E+05 |
| 1.41E+04 | 1.38E+04 | 5.23E+04 | 8.92E+04 | 5.89E+04 | 7.84E+04 | 1.27             | 2.46E+00 | 6.17E-01 | 1.66    | 2.81E+00 | 2.27E-01  | 1.79E+04 | 2.98E+04 |
| 1.73E+05 | 1.05E+05 | 1.38E+05 | 1.24E+05 | 1.04E+05 | 2.41E+05 | 1.27             | 1.13E+00 | 2.75E-01 | 1.66    | 1.30E+00 | 1.48E-02  | 6.61E+04 | 1.10E+05 |
| 2.10E+06 | 1.50E+06 | 2.29E+06 | 2.79E+06 | 1.54E+06 | 3.73E+06 | 1.32             | 1.29E+00 | 2.54E-01 | 1.66    | 1.47E+00 | 2.32E-02  | 9.57E+05 | 1.59E+06 |
| 6.14E+05 | 3.23E+05 | 4.86E+05 | 8.66E+05 | 5.32E+05 | 8.00E+05 | 1.37             | 1.22E+00 | 1.61E-01 | 1.66    | 1.56E+00 | 3.11E-02  | 2.47E+05 | 4.09E+05 |
| 4.53E+05 | 5.87E+05 | 5.00E+05 | 7.75E+05 | 9.09E+05 | 4.02E+05 | 1.31             | 1.21E+00 | 2.39E-01 | 1.65    | 1.28E+00 | 1.28E-02  | 2.62E+05 | 4.34E+05 |
| 5.11E+05 | 4.00E+05 | 6.03E+05 | 8.83E+05 | 5.65E+05 | 2.56E+05 | 1.28             | 1.08E+00 | 2.33E-01 | 1.65    | 1.32E+00 | 1.83E-02  | 2.40E+05 | 3.97E+05 |
| 4.66E+04 | 5.37E+04 | 9.46E+04 | 9.96E+04 | 8.96E+04 | 7.43E+04 | 1.32             | 1.76E+00 | 4.00E-01 | 1.65    | 1.87E+00 | 6.86E-02  | 3.17E+04 | 5.23E+04 |
| 2.99E+05 | 2.77E+05 | 3.29E+05 | 4.00E+05 | 3.22E+05 | 4.51E+05 | 1.27             | 1.15E+00 | 2.91E-01 | 1.65    | 1.19E+00 | 8.97E-03  | 1.52E+05 | 2.52E+05 |

14 Supplemental Table S2

| Accession #         | Protein                                           | # of Pep | PEPTIDE                                                | Modification                                         | XCorr | Charge | m/z [Da] |
|---------------------|---------------------------------------------------|----------|--------------------------------------------------------|------------------------------------------------------|-------|--------|----------|
| 568921717           | Complement factor I                               | 1        | FNVSLIYGR                                              | Deamidated(2)                                        | 2.6   | 2      | 535.3    |
| 755532856           | Laminin, alpha 2                                  | 17       | VFQAESHAQLNDSSAVLDGILDEAK                              | Deamidated(12)                                       | 6.82  | 3      | 910.4    |
| 160333710;755542383 | Serine protease inhibitor A3M                     | 1        | FNLTETSEADIHQGFGHLLQR                                  | Deamidated(2)                                        | 6.66  | 3      | 805.4    |
| 225007625           | Interleukin-6 receptor subunit beta               | 3        | VKPTPPYNLSVTNSEELSSILK                                 | Deamidated(8)                                        | 6.42  | 3      | 806.4    |
| 148747546           | Serine protease inhibitor A3K                     | 4        | FNLTETPEADIHQGFGNLLQSLSQPEDQDQINIGNAMFIEK              | Deamidated(2)Deamidated(17)Oxidation(37)             | 5.74  | 4      | 1155.6   |
| 568956041           | Cadherin-13                                       | 6        | ANYNLPIMVTDSGKPPMTNITDLRIVLDPSGSMNIYLVLDGSDSIGSSNFTGAK | Deamidated(19)Oxidation(8)Oxidation(17)              | 3.17  | 3      | 898.4    |
| 569017755           | Complement factor B                               | 1        | IVLDPSGSMNIYLVLDGSDSIGSSNFTGAK                         | Deamidated(25)Oxidation(9)                           | 4.81  | 3      | 1025.8   |
| 58037159            | Complement component C8 gamma chain               | 1        | EANLTEDQILFFPK                                         | Deamidated(3)                                        | 4.18  | 2      | 833.4    |
| 226371752           | Beta-type platelet-derived growth factor receptor | 1        | AINISVIENGYVR                                          | Deamidated(3)Deamidated(9)                           | 3.19  | 2      | 725.4    |
| 160333901           | Cell surface glycoprotein MUC18                   | 1        | ASGNFSQVDWFLIHK                                        | Deamidated(4)                                        | 4.65  | 3      | 584.0    |
| 11096336            | Carbohydrate sulfotransferase 7                   | 1        | APDSANLTTAMLFRR                                        | Deamidated(6)Oxidation(11)                           | 3.89  | 2      | 762.9    |
| 247269929           | Liver carboxylesterase N                          | 1        | FHSELNISESMIPAVIEQYLR                                  | Deamidated(6)Oxidation(11)                           | 4.95  | 3      | 831.7    |
| 51092293            | Keratin, type II cytoskeletal 1b                  | 1        | WELLQQVNTSTR                                           | Deamidated(8)                                        | 3.65  | 2      | 738.4    |
| 568953122           | Insulin receptor                                  | 4        | ELGLYNLMNITR                                           | Deamidated(9)Oxidation(8)                            | 3.33  | 2      | 727.4    |
| 568956041           | Cadherin-13                                       | 6        | INNTHALVSLQLNLNK                                       | Deamidated(2)                                        | 7.07  | 3      | 598.3    |
| 6753138             | Sodium/potassium-transporting ATPase subunit      | 4        | VLGFKPKPPKNESLETYPLMMK                                 | Carbamyl(10)Deamidated(11)Oxidation(20)Oxidation(21) | 3.4   | 4      | 645.6    |
| 45504394            | Integrin beta-1                                   | 7        | NGVNGTGENGRRK                                          | Deamidated(1)Deamidated(4)Deamidated(9)              | 2.97  | 2      | 602.8    |
| 156616286           | Collagen alpha-6(VI) chain                        | 11       | GVPQVLIVITDGESHDAEKLNTTAK                              | Deamidated(21)                                       | 5.68  | 4      | 659.9    |
| 6753138             | Sodium/potassium-transporting ATPase subunit      | 4        | FKLDWLGNCGLNDDSYGYR                                    | Carbamidomethyl(9)Deamidated(8)                      | 4.87  | 3      | 794.4    |
| 31981720            | Protein Z-dependent protease inhibitor            | 4        | EGNFTSTFDKK                                            | Deamidated(3)                                        | 2.57  | 2      | 637.8    |
| 6753484             | Collagen alpha-1(VI) chain                        | 5        | AALQFLQNYTVLASSVDSMDFINDATDVNDALSIVTR                  | Deamidated(23)Oxidation(19)                          | 5.74  | 3      | 1362.6   |
| 568915857           | Phospholipid transfer protein                     | 4        | RFQIYSNQSALESALIPLQAPLK                                | Deamidated(7)                                        | 5.63  | 3      | 901.2    |
| 7242138             | Sodium/potassium-transporting ATPase subunit      | 3        | FLEPYNDSIQAQK                                          | Deamidated(6)                                        | 3.71  | 2      | 777.4    |
| 568990229           | Leukemia inhibitory factor receptor               | 3        | IEGLTNETYR                                             | Deamidated(6)                                        | 2.67  | 2      | 598.8    |
| 225735655           | prosaposin                                        | 7        | KLVLYLEHNLEKNSTK                                       | Deamidated(13)                                       | 5.13  | 3      | 644.0    |

| MH+ [Da] | RT [min] | PSM | WT-1     | WT-2     | WT-3     | WT-4     | WT-5     | WT-5-2   | WT-6     | WT-7     | WT-8     | Null-1   | Null-2   |
|----------|----------|-----|----------|----------|----------|----------|----------|----------|----------|----------|----------|----------|----------|
| 1069.6   | 47.8     | 1   | 9.81E+04 | 1.30E+05 | 1.49E+05 | 5.95E+04 | 2.63E+05 | 2.06E+05 | 4.90E+04 | 9.43E+04 | 6.87E+04 | 8.24E+04 | 2.07E+05 |
| 2729.3   | 45.4     | 55  | 1.51E+06 | 3.05E+06 | 4.10E+06 | 1.25E+06 | 4.00E+06 | 4.01E+06 | 1.02E+06 | 2.26E+06 | 1.84E+06 | 1.54E+06 | 5.28E+06 |
| 2414.2   | 46.6     | 40  | 3.66E+05 | 1.12E+06 | 1.47E+06 | 6.48E+05 | 1.59E+06 | 1.63E+06 | 3.83E+05 | 8.18E+05 | 1.92E+06 | 3.48E+05 | 2.63E+06 |
| 2417.3   | 49.3     | 17  | 5.31E+05 | 6.68E+05 | 7.63E+05 | 4.94E+05 | 8.49E+05 | 7.59E+05 | 3.14E+05 | 8.23E+05 | 7.07E+05 | 3.32E+05 | 1.10E+06 |
| 4619.2   | 65.9     | 28  | 2.65E+05 | 6.50E+05 | 6.53E+05 | 4.01E+05 | 5.58E+05 | 4.97E+05 | 2.45E+04 | 1.82E+05 | 3.70E+05 | 1.06E+05 | 8.15E+05 |
| 2693.3   | 43.8     | 95  | 4.64E+06 | 3.05E+06 | 7.07E+06 | 2.03E+06 | 9.80E+06 | 1.05E+07 | 2.42E+06 | 5.50E+06 | 4.00E+06 | 5.01E+06 | 8.52E+06 |
| 3075.5   | 61.7     | 26  | 1.21E+05 | 2.29E+05 | 3.53E+05 | 2.07E+05 | 4.14E+05 | 3.54E+05 | 3.93E+04 | 1.04E+05 | 1.43E+05 | 3.61E+04 | 3.95E+05 |
| 1665.8   | 56.6     | 18  | 1.53E+05 | 4.48E+05 | 4.44E+05 | 1.99E+05 | 4.12E+05 | 3.39E+05 | 7.82E+04 | 1.28E+05 | 2.56E+05 | 2.23E+05 | 4.94E+05 |
| 1449.8   | 47.4     | 16  | 2.58E+05 | 5.30E+05 | 5.87E+05 | 2.68E+05 | 4.42E+05 | 3.81E+05 | 2.08E+05 | 4.17E+05 | 3.41E+05 | 1.74E+05 | 6.48E+05 |
| 1749.9   | 51.0     | 13  | 4.27E+05 | 4.79E+05 | 4.42E+05 | 5.74E+05 | 5.68E+05 | 5.21E+05 | 1.96E+05 | 3.61E+05 | 3.73E+05 | 3.83E+05 | 3.68E+05 |
| 1524.7   | 44.1     | 10  | 0.00E+00 | 5.44E+04 | 3.46E+04 | 2.50E+04 | 6.40E+04 | 1.05E+05 | 3.86E+03 | 3.08E+04 | 2.50E+04 | 3.94E+04 | 1.96E+04 |
| 2493.2   | 61.6     | 16  | 1.21E+05 | 1.75E+05 | 1.33E+05 | 4.94E+04 | 2.62E+05 | 2.53E+05 | 5.34E+03 | 1.18E+05 | 1.46E+05 | 2.69E+04 | 1.37E+05 |
| 1475.8   | 44.8     | 1   | 1.49E+04 | 5.67E+04 | 1.52E+04 | 3.94E+04 | 1.06E+04 | 2.22E+03 | 9.06E+03 | 3.75E+05 | 7.91E+04 | 1.38E+05 | 2.74E+05 |
| 1453.7   | 49.5     | 13  | 1.42E+05 | 9.27E+04 | 3.02E+05 | 1.13E+05 | 3.60E+05 | 3.81E+05 | 1.01E+05 | 2.06E+05 | 1.99E+05 | 1.45E+05 | 2.53E+05 |
| 1793.0   | 52.9     | 160 | 3.73E+06 | 2.80E+06 | 7.31E+06 | 2.30E+06 | 1.03E+07 | 1.01E+07 | 1.51E+06 | 5.71E+06 | 3.59E+06 | 4.01E+06 | 9.08E+06 |
| 2579.4   | 33.2     | 107 | 2.54E+05 | 1.01E+05 | 3.68E+05 | 1.50E+05 | 6.29E+05 | 4.64E+05 | 1.04E+05 | 2.42E+05 | 2.46E+05 | 3.02E+05 | 3.47E+05 |
| 1204.6   | 15.9     | 2   | 3.10E+05 | 3.91E+05 | 9.11E+04 | 2.16E+03 | 7.72E+05 | 8.05E+01 | 2.22E+05 | 9.99E+04 | 5.50E+04 | 8.96E+04 | 3.28E+05 |
| 2636.4   | 46.2     | 46  | 7.73E+05 | 7.70E+05 | 1.69E+06 | 6.45E+05 | 2.19E+06 | 2.18E+06 | 3.59E+05 | 1.46E+06 | 6.29E+05 | 7.41E+05 | 2.36E+06 |
| 2381.0   | 51.2     | 7   | 1.21E+05 | 1.84E+05 | 2.15E+05 | 1.52E+05 | 2.16E+05 | 2.22E+05 | 5.15E+04 | 1.39E+05 | 1.23E+05 | 1.43E+05 | 2.14E+05 |
| 1274.6   | 27.4     | 20  | 1.67E+05 | 2.87E+05 | 2.88E+05 | 2.49E+03 | 3.01E+05 | 2.61E+05 | 1.94E+05 | 6.95E+04 | 1.57E+05 | 1.56E+05 | 2.45E+05 |
| 4085.9   | 74.8     | 252 | 1.14E+06 | 4.30E+03 | 2.23E+04 | 9.09E+05 | 2.16E+04 | 9.68E+04 | 4.85E+02 | 1.09E+05 | 2.32E+05 | 4.58E+04 | 2.90E+05 |
| 2701.5   | 62.3     | 11  | 5.19E+04 | 3.59E+04 | 1.42E+05 | 6.64E+03 | 4.67E+04 | 5.46E+04 | 9.72E+02 | 3.60E+04 | 5.60E+03 | 1.03E+04 | 2.50E+05 |
| 1553.7   | 37.8     | 17  | 4.05E+05 | 3.77E+05 | 6.14E+05 | 2.26E+05 | 7.99E+05 | 7.16E+05 | 3.28E+05 | 2.77E+05 | 3.32E+05 | 3.54E+05 | 4.69E+05 |
| 1196.6   | 31.1     | 13  | 9.26E+04 | 9.17E+04 | 7.52E+04 | 5.66E+04 | 1.40E+05 | 1.24E+05 | 2.92E+04 | 3.06E+04 | 5.07E+04 | 8.03E+04 | 1.04E+05 |
| 1930.1   | 30.4     | 5   | 8.02E+04 | 7.69E+04 | 1.21E+05 | 3.78E+03 | 2.11E+05 | 1.73E+05 | 3.90E+04 | 9.04E+04 | 3.07E+04 | 3.59E+04 | 1.12E+05 |

14 Supplemental Table S2

| Null-3   | Null-4   | Null-5   | Null-6   | Null-7   | Null-8   | Ratio<br>Null/WT | SD       | p value  | N Ratio | N SD     | N p value | Avg_WT   | Avg_Null |
|----------|----------|----------|----------|----------|----------|------------------|----------|----------|---------|----------|-----------|----------|----------|
| 1.51E+05 | 1.33E+05 | 1.31E+05 | 2.18E+05 | 1.11E+05 | 1.97E+05 | 1.24             | 1.11E+00 | 3.28E-01 | 1.64    | 1.13E+00 | 7.46E-03  | 6.97E+04 | 1.14E+05 |
| 2.63E+06 | 3.23E+06 | 2.37E+06 | 4.32E+06 | 3.73E+06 | 3.29E+06 | 1.29             | 1.09E+00 | 2.27E-01 | 1.64    | 1.16E+00 | 1.07E-02  | 1.48E+06 | 2.43E+06 |
| 1.64E+06 | 8.61E+05 | 1.21E+06 | 1.70E+06 | 1.02E+06 | 3.02E+06 | 1.41             | 1.55E+00 | 2.51E-01 | 1.63    | 2.07E+00 | 1.26E-01  | 6.93E+05 | 1.13E+06 |
| 5.08E+05 | 1.05E+06 | 1.16E+06 | 8.41E+05 | 1.38E+06 | 6.62E+05 | 1.34             | 9.02E-01 | 1.42E-01 | 1.62    | 1.29E+00 | 3.06E-02  | 4.00E+05 | 6.49E+05 |
| 4.21E+05 | 5.19E+05 | 3.10E+05 | 6.51E+05 | 4.63E+05 | 9.01E+05 | 1.31             | 1.36E+00 | 3.09E-01 | 1.62    | 1.57E+00 | 6.26E-02  | 2.34E+05 | 3.79E+05 |
| 5.56E+06 | 5.77E+06 | 7.45E+06 | 8.48E+06 | 8.18E+06 | 5.03E+06 | 1.24             | 9.91E-01 | 2.88E-01 | 1.62    | 1.07E+00 | 6.08E-03  | 3.13E+06 | 5.06E+06 |
| 1.82E+05 | 1.75E+05 | 2.19E+05 | 3.90E+05 | 2.57E+05 | 5.58E+05 | 1.27             | 1.50E+00 | 4.33E-01 | 1.62    | 1.58E+00 | 8.72E-02  | 1.22E+05 | 1.97E+05 |
| 4.04E+05 | 2.95E+05 | 2.91E+05 | 3.31E+05 | 2.36E+05 | 4.54E+05 | 1.25             | 1.02E+00 | 2.69E-01 | 1.61    | 1.30E+00 | 2.18E-02  | 1.60E+05 | 2.57E+05 |
| 3.15E+05 | 5.65E+05 | 4.39E+05 | 9.44E+05 | 4.77E+05 | 4.68E+05 | 1.32             | 1.04E+00 | 2.09E-01 | 1.61    | 1.28E+00 | 3.74E-02  | 2.29E+05 | 3.69E+05 |
| 6.23E+05 | 7.76E+05 | 5.72E+05 | 9.09E+05 | 5.08E+05 | 1.61E+05 | 1.23             | 8.78E-01 | 3.10E-01 | 1.61    | 1.16E+00 | 5.20E-02  | 2.57E+05 | 4.13E+05 |
| 5.99E+04 | 3.35E+04 | 2.30E+04 | 8.41E+04 | 7.59E+04 | 3.84E+04 | 1.23             | 1.68E+00 | 5.41E-01 | 1.61    | 1.94E+00 | 1.16E-01  | 2.17E+04 | 3.48E+04 |
| 8.57E+04 | 1.59E+05 | 1.54E+05 | 3.47E+05 | 2.07E+05 | 3.90E+05 | 1.34             | 1.69E+00 | 3.72E-01 | 1.60    | 1.80E+00 | 1.32E-01  | 8.32E+04 | 1.33E+05 |
| 1.89E+04 | 1.04E+05 | 5.84E+04 | 6.05E+04 | 1.69E+05 | 8.34E+03 | 1.55             | 4.06E+00 | 4.74E-01 | 1.59    | 4.23E+00 | 4.54E-01  | 4.92E+04 | 7.82E+04 |
| 2.12E+05 | 2.45E+05 | 2.66E+05 | 4.72E+05 | 3.90E+05 | 1.31E+05 | 1.25             | 1.21E+00 | 3.51E-01 | 1.59    | 1.34E+00 | 3.76E-02  | 1.23E+05 | 1.95E+05 |
| 5.10E+06 | 5.45E+06 | 6.49E+06 | 7.81E+06 | 7.81E+06 | 5.11E+06 | 1.21             | 1.09E+00 | 3.98E-01 | 1.58    | 1.16E+00 | 1.60E-02  | 3.00E+06 | 4.73E+06 |
| 2.95E+05 | 2.02E+05 | 4.14E+05 | 5.37E+05 | 4.34E+05 | 1.82E+05 | 1.19             | 1.16E+00 | 4.58E-01 | 1.57    | 1.31E+00 | 3.51E-02  | 1.63E+05 | 2.55E+05 |
| 1.14E+05 | 2.78E+05 | 2.99E+05 | 3.28E+05 | 3.31E+05 | 2.51E+05 | 1.17             | 1.80E+00 | 6.94E-01 | 1.57    | 2.08E+00 | 1.57E-01  | 1.17E+05 | 1.84E+05 |
| 1.21E+06 | 1.38E+06 | 1.24E+06 | 1.66E+06 | 1.35E+06 | 1.44E+06 | 1.20             | 1.10E+00 | 4.27E-01 | 1.57    | 1.22E+00 | 2.55E-02  | 6.76E+05 | 1.06E+06 |
| 1.65E+05 | 1.79E+05 | 1.69E+05 | 2.30E+05 | 2.96E+05 | 1.57E+05 | 1.23             | 7.58E-01 | 1.90E-01 | 1.56    | 7.69E-01 | 1.28E-03  | 9.24E+04 | 1.44E+05 |
| 2.82E+05 | 1.45E+05 | 1.87E+05 | 2.29E+05 | 1.88E+05 | 4.28E+05 | 1.21             | 1.14E+00 | 4.06E-01 | 1.56    | 1.31E+00 | 4.09E-02  | 1.11E+05 | 1.73E+05 |
| 4.19E+05 | 3.80E+05 | 9.31E+05 | 6.84E+04 | 8.86E+04 | 3.88E+05 | 1.16             | 2.80E+00 | 8.01E-01 | 1.56    | 3.67E+00 | 4.40E-01  | 1.64E+05 | 2.55E+05 |
| 1.63E+04 | 1.86E+04 | 3.85E+03 | 4.36E+03 | 8.49E+04 | 1.85E+04 | 1.20             | 3.22E+00 | 8.00E-01 | 1.56    | 4.05E+00 | 5.79E-01  | 2.32E+04 | 3.62E+04 |
| 5.98E+05 | 4.19E+05 | 5.54E+05 | 9.45E+05 | 5.42E+05 | 3.57E+05 | 1.17             | 9.51E-01 | 4.33E-01 | 1.55    | 1.03E+00 | 2.38E-02  | 2.58E+05 | 3.99E+05 |
| 4.85E+04 | 8.82E+04 | 6.53E+04 | 8.37E+04 | 1.12E+05 | 1.46E+05 | 1.18             | 9.92E-01 | 4.13E-01 | 1.55    | 9.82E-01 | 9.48E-03  | 4.33E+04 | 6.70E+04 |
| 6.47E+04 | 1.04E+05 | 7.22E+04 | 2.21E+05 | 1.25E+05 | 1.35E+05 | 1.19             | 1.48E+00 | 5.78E-01 | 1.55    | 1.57E+00 | 9.34E-02  | 5.07E+04 | 7.83E+04 |

14 Supplemental Table S2



| Accession # | Protein                                                         | # of Pep | PEPTIDE                                | Modification                                          | XCorr | Charge | m/z [Da] |
|-------------|-----------------------------------------------------------------|----------|----------------------------------------|-------------------------------------------------------|-------|--------|----------|
| 755493733   | Complement component 4 binding protein                          | 2        | LACLNGTVLR                             | Carbamidomethyl(3)Deamidated(5)                       | 3.07  | 2      | 559.3    |
| 569008736   | Sodium/hydrogen exchanger                                       | 1        | AFSTLLVNVSGK                           | Deamidated(8)                                         | 3.07  | 2      | 618.8    |
| 6753138     | Sodium/potassium-transporting ATPase subunit                    | 4        | YLQPLLAVQFTNLTVDTEIR                   | Deamidated(12)                                        | 5.11  | 3      | 779.1    |
| 575771903   | Inter alpha-trypsin inhibitor, heavy chain 4                    | 5        | AFITNFSMIIDGVTPGVVK                    | Deamidated(5)Oxidation(8)                             | 3.75  | 2      | 1095.1   |
| 568926396   | Tenascin                                                        | 12       | EEFWLGLDNLSK                           | Deamidated(9)                                         | 3.14  | 2      | 726.4    |
| 27734196    | Cartilage intermediate layer protein                            | 2        | LPHDCFQNASNSFYVDVGR                    | Carbamidomethyl(5)Deamidated(8)                       | 6.96  | 3      | 764.3    |
| 116014342   | Basigin                                                         | 4        | SQLTISNLDVNVDPGTYVCNATNAQGTTR          | Carbamidomethyl(19)Deamidated(20)                     | 7.03  | 3      | 1037.5   |
| 6754186     | Beta-hexosaminidase subunit beta                                | 1        | TQVFGPVDPTVNTTYAFFNTFFK                | Deamidated(12)                                        | 3.51  | 3      | 881.4    |
| 31982171    | Murinoglobulin-1                                                | 4        | EVNSQLDNNGCSTQEVNITELQSK               | Carbamidomethyl(11)Deamidated(8)Deamidated(17)        | 5.33  | 3      | 903.7    |
| 13507644    | Carboxypeptidase N catalytic chain                              | 2        | IHILPSMNPDGVEVAAAQGNMSGYLVGR           | Deamidated(21)Oxidation(7)Oxidation(22)               | 7.3   | 3      | 1030.8   |
| 568954529   | Protocadherin Fat 1                                             | 6        | GISYQLIGNHSK                           | Deamidated(9)                                         | 2.84  | 2      | 659.3    |
| 568991301   | Plexin B2                                                       | 10       | VTVEGMEYVFYNDTK                        | Deamidated(12)Oxidation(6)                            | 2.76  | 2      | 906.4    |
| 6753798     | Prothrombin                                                     | 2        | YPHKPEINSTTHPGADLK                     | Deamidated(8)                                         | 4.19  | 4      | 502.3    |
| 111378397   | phosphatidylinositol-glycan-specific phospholipase D            | 3        | VNGTLTQVLLVGAPTHDDVSK                  | Deamidated(2)                                         | 6.91  | 3      | 722.4    |
| 45504394    | Integrin beta-1                                                 | 7        | NGVNGTGENGR                            | Deamidated(1)Deamidated(4)Deamidated(9)               | 2.73  | 2      | 538.7    |
| 31791059    | CD166 antigen                                                   | 3        | TVNSLNVSAISIEPHDEADDISDENR             | Deamidated(6)                                         | 6.89  | 3      | 947.8    |
| 6754950     | Alpha-1-acid glycoprotein 2                                     | 1        | EYHTIDDHCVYNSTHLGIQR                   | Carbamidomethyl(9)Deamidated(12)                      | 3.92  | 4      | 615.5    |
| 22122339    | Pituitary tumor-transforming gene 1 protein-interacting protein | 1        | VGCSEYTNR                              | Carbamidomethyl(3)Deamidated(8)                       | 2.75  | 2      | 543.7    |
| 568915857   | Phospholipid transfer protein                                   | 4        | VSNVSCEASVSK                           | Carbamidomethyl(6)Deamidated(3)                       | 3.98  | 2      | 634.3    |
| 31982278    | Lipase, hepatic                                                 | 1        | IPITLGEIGTSNK                          | Deamidated(12)                                        | 3.05  | 2      | 672.4    |
| 19526900    | cell cycle control protein 50A                                  | 2        | RDDLHPTLPAGQYFLNITYNYPVHSFDGR          | Deamidated(16)                                        | 7.42  | 4      | 852.7    |
| 575771903   | Inter alpha-trypsin inhibitor, heavy chain 4                    | 5        | HLQMDIYIFEPQGISILETESTFMTPELANALTTSQNK | Deamidated(30)Deamidated(37)Oxidation(4)Oxidation(24) | 6.95  | 3      | 1448.7   |
| 755493733   | Complement component 4 binding protein                          | 2        | LVGSPFIGCTVVNK                         | Carbamidomethyl(9)Deamidated(13)                      | 2.81  | 2      | 746.4    |

| MH+ [Da] | RT [min] | PSM | WT-1     | WT-2     | WT-3     | WT-4     | WT-5     | WT-5-2   | WT-6     | WT-7     | WT-8     | Null-1   | Null-2   |
|----------|----------|-----|----------|----------|----------|----------|----------|----------|----------|----------|----------|----------|----------|
| 1117.6   | 36.9     | 14  | 9.53E+05 | 1.22E+06 | 1.44E+06 | 4.99E+05 | 1.77E+06 | 1.83E+06 | 4.81E+05 | 3.42E+05 | 6.08E+05 | 6.85E+05 | 1.60E+06 |
| 1236.7   | 47.3     | 16  | 1.11E+05 | 1.15E+05 | 2.10E+05 | 8.16E+04 | 3.28E+05 | 2.92E+05 | 7.63E+04 | 2.59E+05 | 1.08E+05 | 1.23E+05 | 3.35E+05 |
| 2335.3   | 66.7     | 84  | 4.02E+05 | 3.05E+05 | 1.27E+06 | 3.83E+05 | 8.18E+05 | 6.75E+05 | 1.63E+05 | 8.56E+05 | 2.30E+05 | 1.18E+05 | 5.12E+05 |
| 2189.1   | 62.1     | 191 | 2.63E+06 | 7.75E+06 | 7.49E+06 | 3.09E+06 | 1.07E+07 | 1.00E+07 | 2.14E+06 | 5.03E+06 | 8.97E+06 | 3.29E+06 | 8.83E+06 |
| 1451.7   | 58.7     | 5   | 9.97E+04 | 1.04E+05 | 2.77E+05 | 1.42E+05 | 3.93E+05 | 3.25E+05 | 2.86E+04 | 2.63E+05 | 1.12E+05 | 8.92E+04 | 3.22E+05 |
| 2291.0   | 40.8     | 5   | 2.41E+05 | 2.72E+05 | 4.26E+05 | 1.46E+05 | 6.41E+05 | 5.46E+05 | 2.40E+05 | 2.82E+05 | 1.57E+05 | 2.41E+05 | 5.32E+05 |
| 3110.5   | 52.7     | 71  | 7.28E+05 | 5.91E+05 | 1.63E+06 | 4.02E+05 | 2.21E+06 | 1.93E+06 | 2.78E+05 | 1.03E+06 | 7.29E+05 | 5.94E+05 | 2.36E+06 |
| 2642.3   | 75.0     | 35  | 1.52E+03 | 1.19E+05 | 5.53E+03 | 1.75E+03 | 2.18E+03 | 2.21E+05 | 1.67E+03 | 1.36E+05 | 4.12E+02 | 2.51E+02 | 1.13E+03 |
| 2709.2   | 39.9     | 23  | 1.46E+05 | 3.55E+05 | 4.46E+05 | 1.56E+05 | 3.49E+05 | 3.26E+05 | 1.61E+05 | 7.25E+04 | 2.18E+05 | 1.86E+05 | 3.69E+05 |
| 3090.5   | 44.1     | 6   | 4.20E+04 | 6.16E+04 | 1.04E+05 | 3.60E+04 | 1.00E+05 | 1.32E+05 | 1.07E+04 | 1.30E+04 | 4.24E+04 | 5.02E+04 | 1.22E+05 |
| 1317.7   | 30.8     | 3   | 1.12E+05 | 1.78E+05 | 2.05E+05 | 8.12E+04 | 1.98E+05 | 2.14E+05 | 9.20E+04 | 1.44E+05 | 9.58E+04 | 8.06E+04 | 1.84E+05 |
| 1811.8   | 42.0     | 16  | 5.02E+05 | 7.51E+05 | 6.98E+05 | 3.39E+05 | 7.77E+05 | 7.83E+05 | 3.67E+05 | 5.61E+05 | 4.92E+05 | 4.33E+05 | 7.96E+05 |
| 2006.0   | 22.0     | 16  | 4.71E+05 | 7.23E+05 | 7.07E+05 | 7.87E+04 | 1.27E+06 | 1.14E+06 | 6.90E+05 | 2.95E+05 | 6.91E+05 | 4.05E+05 | 8.49E+05 |
| 2165.1   | 47.0     | 37  | 1.51E+06 | 1.81E+06 | 2.87E+06 | 1.23E+06 | 3.23E+06 | 3.42E+06 | 1.34E+06 | 1.30E+06 | 2.62E+06 | 9.13E+05 | 3.04E+06 |
| 1076.5   | 16.1     | 46  | 1.56E+05 | 2.97E+04 | 4.60E+04 | 1.99E+02 | 7.37E+05 | 1.57E+06 | 3.83E+05 | 5.04E+04 | 3.62E+04 | 3.46E+04 | 1.31E+05 |
| 2841.3   | 43.8     | 11  | 7.41E+04 | 1.34E+05 | 1.14E+05 | 5.34E+04 | 1.33E+05 | 1.26E+05 | 6.82E+04 | 1.02E+05 | 7.22E+04 | 4.08E+04 | 1.13E+05 |
| 2459.1   | 30.5     | 7   | 3.59E+04 | 5.46E+04 | 5.77E+04 | 2.06E+05 | 1.25E+05 | 9.58E+04 | 7.04E+04 | 7.93E+04 | 8.44E+04 | 6.59E+04 | 1.25E+05 |
| 1086.5   | 17.7     | 7   | 1.02E+05 | 1.42E+05 | 1.88E+05 | 6.32E+03 | 2.17E+05 | 2.88E+04 | 1.59E+05 | 1.63E+05 | 6.89E+04 | 6.34E+04 | 1.75E+05 |
| 1267.6   | 20.5     | 20  | 4.18E+05 | 3.23E+05 | 6.60E+05 | 0.00E+00 | 1.12E+06 | 1.01E+06 | 5.30E+05 | 3.23E+05 | 2.25E+05 | 1.67E+05 | 7.91E+05 |
| 1343.7   | 41.8     | 8   | 6.24E+04 | 1.80E+05 | 1.86E+05 | 6.19E+04 | 3.03E+05 | 3.43E+05 | 6.93E+04 | 6.56E+04 | 8.37E+04 | 6.68E+04 | 1.62E+05 |
| 3407.6   | 53.4     | 26  | 1.30E+05 | 1.48E+05 | 2.31E+05 | 7.53E+04 | 1.95E+05 | 1.58E+05 | 1.57E+03 | 1.40E+05 | 1.07E+05 | 6.32E+04 | 1.61E+05 |
| 4344.1   | 65.5     | 49  | 1.77E+05 | 5.12E+05 | 8.79E+05 | 2.65E+05 | 8.39E+05 | 6.35E+05 | 8.07E+04 | 3.75E+05 | 2.54E+05 | 6.76E+04 | 3.16E+05 |
| 1491.8   | 44.1     | 17  | 3.60E+05 | 5.96E+05 | 8.92E+05 | 2.50E+05 | 8.53E+05 | 8.25E+05 | 2.54E+05 | 1.71E+05 | 3.02E+05 | 3.68E+05 | 7.11E+05 |

14 Supplemental Table S2

| Null-3   | Null-4   | Null-5   | Null-6   | Null-7   | Null-8   | Ratio<br>Null/WT | SD       | p value  | N Ratio | N SD     | N p value | Avg_WT   | Avg_Null |
|----------|----------|----------|----------|----------|----------|------------------|----------|----------|---------|----------|-----------|----------|----------|
| 1.23E+06 | 1.12E+06 | 1.14E+06 | 8.84E+05 | 7.49E+05 | 1.84E+06 | 1.14             | 1.04E+00 | 5.65E-01 | 1.53    | 1.18E+00 | 3.37E-02  | 5.68E+05 | 8.70E+05 |
| 1.03E+05 | 1.70E+05 | 2.48E+05 | 2.85E+05 | 2.54E+05 | 1.74E+05 | 1.20             | 1.13E+00 | 4.20E-01 | 1.53    | 1.30E+00 | 4.96E-02  | 1.02E+05 | 1.56E+05 |
| 4.14E+05 | 2.51E+05 | 1.12E+06 | 1.14E+06 | 1.16E+06 | 8.15E+05 | 1.22             | 1.53E+00 | 5.26E-01 | 1.53    | 1.83E+00 | 1.80E-01  | 3.25E+05 | 4.97E+05 |
| 9.01E+06 | 4.67E+06 | 7.61E+06 | 1.23E+07 | 7.62E+06 | 1.19E+07 | 1.27             | 1.14E+00 | 2.88E-01 | 1.53    | 1.44E+00 | 7.14E-02  | 3.93E+06 | 6.00E+06 |
| 1.52E+05 | 1.91E+05 | 1.47E+05 | 3.77E+05 | 2.89E+05 | 2.99E+05 | 1.20             | 1.29E+00 | 4.83E-01 | 1.52    | 1.36E+00 | 6.27E-02  | 1.11E+05 | 1.68E+05 |
| 2.45E+05 | 3.90E+05 | 3.31E+05 | 4.04E+05 | 4.71E+05 | 3.66E+05 | 1.14             | 9.07E-01 | 5.20E-01 | 1.51    | 8.64E-01 | 7.57E-03  | 1.83E+05 | 2.76E+05 |
| 9.76E+05 | 8.87E+05 | 1.24E+06 | 1.22E+06 | 1.35E+06 | 1.09E+06 | 1.15             | 1.25E+00 | 6.07E-01 | 1.50    | 1.38E+00 | 8.76E-02  | 6.01E+05 | 9.00E+05 |
| 0.00E+00 | 2.07E+03 | 3.00E+03 | 2.94E+05 | 1.54E+05 | 1.44E+05 | 1.38             | 4.14E+00 | 6.76E-01 | 1.50    | 4.45E+00 | 6.05E-01  | 3.25E+04 | 4.86E+04 |
| 3.65E+05 | 2.84E+05 | 2.17E+05 | 2.22E+05 | 1.89E+05 | 4.24E+05 | 1.14             | 9.48E-01 | 5.27E-01 | 1.49    | 1.22E+00 | 5.70E-02  | 1.43E+05 | 2.14E+05 |
| 6.36E+04 | 2.51E+04 | 6.14E+04 | 7.61E+04 | 7.80E+04 | 5.92E+04 | 1.11             | 1.25E+00 | 7.07E-01 | 1.49    | 1.47E+00 | 1.08E-01  | 3.36E+04 | 4.99E+04 |
| 1.09E+05 | 1.14E+05 | 1.53E+05 | 3.10E+05 | 3.21E+05 | 1.28E+05 | 1.19             | 1.06E+00 | 4.65E-01 | 1.48    | 1.07E+00 | 7.07E-02  | 8.53E+04 | 1.26E+05 |
| 4.37E+05 | 7.44E+05 | 7.75E+05 | 6.79E+05 | 1.19E+06 | 4.84E+05 | 1.18             | 7.78E-01 | 3.35E-01 | 1.48    | 8.99E-01 | 2.18E-02  | 3.47E+05 | 5.13E+05 |
| 8.19E+05 | 6.12E+05 | 7.10E+05 | 8.83E+05 | 6.22E+05 | 1.34E+06 | 1.16             | 1.05E+00 | 5.13E-01 | 1.47    | 1.17E+00 | 5.24E-02  | 3.93E+05 | 5.78E+05 |
| 2.35E+06 | 1.25E+06 | 3.14E+06 | 3.66E+06 | 2.36E+06 | 3.76E+06 | 1.19             | 9.80E-01 | 4.00E-01 | 1.47    | 1.24E+00 | 7.79E-02  | 1.28E+06 | 1.88E+06 |
| 4.44E+04 | 6.10E+04 | 7.71E+05 | 9.31E+05 | 1.03E+05 | 7.00E+05 | 1.04             | 2.76E+00 | 9.55E-01 | 1.47    | 3.81E+00 | 5.47E-01  | 1.68E+05 | 2.47E+05 |
| 5.47E+04 | 1.30E+05 | 8.92E+04 | 1.63E+05 | 1.80E+05 | 1.65E+05 | 1.20             | 9.16E-01 | 3.77E-01 | 1.46    | 9.82E-01 | 4.73E-02  | 5.75E+04 | 8.39E+04 |
| 6.40E+04 | 3.17E+04 | 4.82E+04 | 6.72E+04 | 5.95E+04 | 4.00E+05 | 1.20             | 2.02E+00 | 7.10E-01 | 1.45    | 2.17E+00 | 4.15E-01  | 5.24E+04 | 7.62E+04 |
| 9.45E+04 | 1.23E+05 | 1.59E+05 | 2.09E+05 | 1.43E+05 | 1.41E+05 | 1.16             | 1.08E+00 | 5.28E-01 | 1.45    | 1.20E+00 | 7.19E-02  | 7.04E+04 | 1.02E+05 |
| 2.74E+05 | 3.38E+05 | 6.68E+05 | 6.31E+05 | 5.57E+05 | 1.09E+06 | 1.10             | 1.38E+00 | 7.49E-01 | 1.45    | 1.45E+00 | 1.53E-01  | 2.81E+05 | 4.07E+05 |
| 1.18E+05 | 1.15E+05 | 1.94E+05 | 1.72E+05 | 1.79E+05 | 3.13E+05 | 1.09             | 1.28E+00 | 7.55E-01 | 1.44    | 1.36E+00 | 1.16E-01  | 8.32E+04 | 1.20E+05 |
| 9.03E+04 | 1.45E+05 | 1.36E+05 | 2.49E+05 | 2.35E+05 | 1.45E+05 | 1.16             | 1.07E+00 | 5.15E-01 | 1.43    | 1.13E+00 | 7.65E-02  | 7.79E+04 | 1.11E+05 |
| 4.17E+05 | 1.94E+05 | 5.92E+05 | 9.86E+05 | 6.68E+05 | 7.82E+05 | 1.13             | 1.42E+00 | 7.04E-01 | 1.42    | 1.55E+00 | 2.22E-01  | 2.52E+05 | 3.59E+05 |
| 4.56E+05 | 5.52E+05 | 3.88E+05 | 4.63E+05 | 4.61E+05 | 8.75E+05 | 1.07             | 9.73E-01 | 7.71E-01 | 1.42    | 1.04E+00 | 5.49E-02  | 2.79E+05 | 3.98E+05 |

| Accession # | Protein                                                                                                                    | # of Pep | PEPTIDE                 | Modification                            | XCorr | Charge | m/z [Da] |
|-------------|----------------------------------------------------------------------------------------------------------------------------|----------|-------------------------|-----------------------------------------|-------|--------|----------|
| 133778931   | Sarcoplasmic reticulum histidine-rich calcium-binding proteinsarcoplasmic reticulum histidine-rich calcium-binding protein | 1        | EVGEEENVSEEVFR          | Deamidated(6)                           | 3.55  | 2      | 762.3    |
| 117320545   | CD180 antigen                                                                                                              | 2        | LINLTFDLTR              | Deamidated(3)                           | 3.37  | 2      | 660.4    |
| 6755987     | Vitronectin                                                                                                                | 3        | NISEGFSGIPDNVDAAFALPAHR | Deamidated(1)                           | 6.01  | 3      | 800.4    |
| 568930638   | Basement membrane-specific heparan sulfate proteoglycan core protein                                                       | 8        | TDEANCSVK               | Carbamidomethyl(6)Deamidated(5)         | 3.07  | 2      | 512.7    |
| 148747546   | Serine protease inhibitor A3K                                                                                              | 4        | YTGNASALLILPDQGR        | Deamidated(4)                           | 4.98  | 2      | 845.4    |
| 568915167   | Plasma protease C1 inhibitor                                                                                               | 1        | DTYVNASQSLYGSSPR        | Deamidated(5)                           | 4.54  | 2      | 873.4    |
| 755504188   | Exostosin-like 2                                                                                                           | 1        | SALDSFTLIMQTYNR         | Deamidated(14)Oxidation(10)             | 3.08  | 2      | 888.9    |
| 568991301   | Plexin B2                                                                                                                  | 10       | IKQDLALSGNLSSLYAMTQDK   | Deamidated(10)Oxidation(17)             | 5.28  | 3      | 771.7    |
| 340745359   | Hemolytic complement-like                                                                                                  | 2        | LEIVPIIYDNDLSLFVQTDK    | Deamidated(10)                          | 3.76  | 2      | 1112.1   |
| 31560699    | Follistatin-related protein 1                                                                                              | 2        | FVEQNETAINITTYADQENNK   | Deamidated(5)Deamidated(10)             | 3.3   | 3      | 815.4    |
| 6754698     | Multiple inositol polyphosphate phosphatase 1                                                                              | 1        | FLTDVERNETALYHVEAFK     | Deamidated(8)                           | 3.25  | 4      | 571.5    |
| 6679182     | Alpha-1-acid glycoprotein 1                                                                                                | 1        | ESQTIGDQCQVYNSTHLGFQR   | Carbamidomethyl(9)Deamidated(12)        | 6.34  | 3      | 781.0    |
| 755534805   | N-acetylglucosamine-1-phosphotransferase                                                                                   | 4        | NPSTNVSVVFDTTK          | Deamidated(5)                           | 3.1   | 2      | 804.9    |
| 225735655   | prosaposin                                                                                                                 | 7        | TNSSFIQGFVDHVK          | Deamidated(2)                           | 3.92  | 2      | 790.4    |
| 568987201   | Zinc transporter ZIP14                                                                                                     | 2        | SLLDHLHVGVRDQNVSPK      | Deamidated(14)                          | 4.74  | 3      | 691.4    |
| 148232950   | carboxypeptidase Q                                                                                                         | 1        | EVMNLLQPLNVTK           | Deamidated(10)Oxidation(3)              | 3.61  | 2      | 758.4    |
| 568922892   | UDP-GalNAc:beta-1,3-N-acetylgalactosaminyltransferase 1                                                                    | 1        | QDFLDTYNNLTLK           | Deamidated(8)                           | 2.44  | 2      | 793.4    |
| 160333710   | Serine protease inhibitor A3M                                                                                              | 2        | YTGNASALFILPDQGR        | Deamidated(4)                           | 4.44  | 2      | 862.4    |
| 225735655   | prosaposin                                                                                                                 | 7        | FSELIVNNATEELLVK        | Deamidated(7)Deamidated(8)              | 3.57  | 2      | 910.0    |
| 29244210    | Inositol monophosphatase 3                                                                                                 | 1        | QVALQTFGNQTSIIPAGGAGYK  | Deamidated(9)                           | 3.8   | 2      | 1111.6   |
| 568956156   | G-protein coupled receptor 56                                                                                              | 1        | VTNLSDPVVLTFQHQPQPK     | Deamidated(3)                           | 4.93  | 3      | 717.0    |
| 568982433   | Semaphorin-4D                                                                                                              | 1        | AANYTSSLNLPDK           | Deamidated(3)                           | 2.83  | 2      | 697.8    |
| 116014342   | Basigin                                                                                                                    | 4        | TSDTGEEEEAITNSTEANGK    | Deamidated(12)                          | 3.84  | 2      | 977.9    |
| 568996556   | HEG homolog 1                                                                                                              | 1        | TTFALASNVTLFLDLADR      | Deamidated(8)                           | 4.99  | 2      | 928.5    |
| 15375312    | Complement component C9                                                                                                    | 1        | GAGEVSPAETHSSKPTNISAK   | Deamidated(16)                          | 4.9   | 4      | 492.7    |
| 171846253   | Transmembrane glycoprotein NMB                                                                                             | 6        | VSINTVNLTAGPQVMEVTVFR   | Deamidated(4)Deamidated(7)Oxidation(15) | 3.28  | 2      | 1146.1   |
| 113205065   | Tissue inhibitor of metalloproteinase 1                                                                                    | 1        | FMGSPEINETTLYQR         | Deamidated(8)Oxidation(2)               | 4.41  | 2      | 901.9    |
| 226054321   | Receptor-type tyrosine-protein phosphatase mu                                                                              | 1        | FIASFNVVNTTK            | Deamidated(9)                           | 3.06  | 2      | 671.4    |
| 112293269   | Integrin alpha 7                                                                                                           | 3        | LWNSTFLEEYMAVK          | Deamidated(3)Oxidation(11)              | 3.95  | 2      | 874.4    |

14 Supplemental Table S2

| MH+ [Da] | RT [min] | PSM | WT-1     | WT-2     | WT-3     | WT-4     | WT-5     | WT-5-2   | WT-6     | WT-7     | WT-8     | Null-1   | Null-2   |
|----------|----------|-----|----------|----------|----------|----------|----------|----------|----------|----------|----------|----------|----------|
| 1523.7   | 38.7     | 17  | 3.94E+05 | 2.15E+05 | 5.26E+05 | 1.58E+05 | 9.58E+05 | 8.55E+05 | 1.73E+05 | 3.80E+05 | 2.84E+05 | 4.21E+05 | 5.96E+05 |
| 1319.8   | 63.7     | 27  | 7.61E+05 | 1.14E+06 | 1.33E+06 | 4.26E+05 | 9.05E+05 | 7.85E+05 | 2.99E+05 | 7.47E+05 | 3.12E+05 | 1.89E+05 | 1.20E+06 |
| 2399.2   | 55.9     | 111 | 5.09E+06 | 1.08E+07 | 1.45E+07 | 4.94E+06 | 1.53E+07 | 1.32E+07 | 3.54E+06 | 4.90E+06 | 6.03E+06 | 5.45E+06 | 8.25E+06 |
| 1024.4   | 15.9     | 1   | 1.19E+05 | 2.21E+05 | 1.72E+05 | 0.00E+00 | 3.87E+05 | 1.07E+02 | 2.97E+05 | 1.12E+05 | 8.59E+04 | 4.21E+04 | 2.69E+05 |
| 1689.9   | 49.9     | 82  | 2.53E+06 | 5.60E+06 | 4.82E+06 | 4.40E+06 | 5.15E+06 | 4.09E+06 | 2.06E+06 | 1.26E+06 | 5.24E+06 | 3.29E+06 | 7.14E+06 |
| 1745.8   | 36.5     | 57  | 1.02E+06 | 1.23E+06 | 1.58E+06 | 8.50E+05 | 2.58E+06 | 2.24E+06 | 1.03E+06 | 8.68E+05 | 1.20E+06 | 9.18E+05 | 1.99E+06 |
| 1776.9   | 53.8     | 16  | 2.11E+05 | 1.78E+05 | 1.65E+05 | 2.30E+05 | 3.24E+05 | 3.37E+05 | 7.74E+04 | 1.96E+05 | 1.98E+05 | 1.88E+05 | 2.09E+05 |
| 2313.2   | 45.7     | 7   | 6.81E+05 | 9.60E+05 | 1.17E+06 | 4.42E+05 | 9.60E+05 | 9.66E+05 | 3.44E+05 | 7.28E+05 | 5.34E+05 | 4.00E+05 | 1.47E+06 |
| 2223.1   | 64.7     | 20  | 4.15E+04 | 1.14E+05 | 1.53E+05 | 5.87E+04 | 1.12E+05 | 1.01E+05 | 1.08E+04 | 3.29E+04 | 3.98E+04 | 1.77E+04 | 1.58E+05 |
| 2444.1   | 44.0     | 2   | 5.12E+05 | 3.92E+05 | 7.07E+05 | 2.09E+05 | 8.67E+05 | 8.89E+05 | 1.18E+05 | 4.76E+05 | 3.80E+05 | 3.18E+05 | 9.04E+05 |
| 2283.1   | 45.2     | 5   | 4.23E+04 | 5.95E+04 | 6.61E+04 | 1.36E+04 | 8.85E+04 | 1.06E+05 | 1.33E+04 | 4.30E+04 | 1.74E+04 | 2.33E+04 | 3.47E+04 |
| 2341.1   | 37.5     | 16  | 2.41E+05 | 3.59E+05 | 4.44E+05 | 1.81E+05 | 6.77E+05 | 6.68E+05 | 2.40E+05 | 2.96E+05 | 2.45E+05 | 3.33E+05 | 5.47E+05 |
| 1608.8   | 44.1     | 7   | 6.82E+04 | 9.58E+04 | 1.09E+05 | 4.66E+04 | 9.52E+04 | 1.16E+05 | 4.74E+04 | 6.38E+04 | 5.26E+04 | 5.12E+04 | 1.92E+05 |
| 1579.8   | 45.8     | 30  | 1.71E+06 | 2.26E+06 | 3.04E+06 | 6.69E+05 | 4.16E+06 | 3.85E+06 | 1.65E+06 | 2.09E+06 | 1.21E+06 | 1.14E+06 | 2.79E+06 |
| 2072.1   | 35.2     | 2   | 1.42E+05 | 6.72E+04 | 1.15E+05 | 5.71E+04 | 1.38E+05 | 1.67E+05 | 3.73E+04 | 7.03E+04 | 4.73E+04 | 7.41E+04 | 2.80E+05 |
| 1515.8   | 47.2     | 17  | 2.79E+05 | 2.18E+05 | 3.17E+05 | 1.27E+05 | 4.63E+05 | 5.00E+05 | 1.30E+05 | 1.71E+05 | 1.45E+05 | 2.17E+05 | 3.08E+05 |
| 1585.8   | 51.7     | 1   | 1.96E+05 | 6.40E+04 | 2.01E+05 | 2.10E+05 | 2.37E+05 | 2.54E+05 | 2.71E+04 | 2.37E+05 | 1.44E+05 | 1.76E+05 | 2.18E+05 |
| 1723.9   | 52.2     | 33  | 3.12E+05 | 7.59E+05 | 1.02E+06 | 5.08E+05 | 1.34E+06 | 1.06E+06 | 4.92E+05 | 6.21E+05 | 1.30E+06 | 4.64E+05 | 8.50E+05 |
| 1819.0   | 54.1     | 363 | 5.13E+06 | 9.22E+06 | 1.43E+07 | 3.64E+06 | 1.39E+07 | 1.20E+07 | 2.99E+06 | 6.48E+06 | 4.52E+06 | 2.36E+06 | 1.10E+07 |
| 2222.1   | 47.8     | 6   | 8.64E+04 | 1.56E+04 | 1.07E+05 | 6.24E+04 | 2.14E+05 | 2.67E+05 | 4.10E+04 | 1.15E+05 | 1.06E+05 | 8.94E+04 | 1.80E+05 |
| 2149.1   | 41.5     | 6   | 6.97E+04 | 7.02E+04 | 1.06E+05 | 4.37E+04 | 1.65E+05 | 1.49E+05 | 5.17E+04 | 6.41E+04 | 5.18E+04 | 8.13E+04 | 9.35E+04 |
| 1394.7   | 35.5     | 2   | 2.83E+05 | 1.47E+05 | 2.85E+05 | 1.85E+05 | 4.29E+05 | 4.00E+05 | 1.12E+05 | 2.90E+05 | 2.51E+05 | 2.17E+05 | 3.04E+05 |
| 1954.8   | 25.5     | 198 | 1.63E+05 | 4.05E+04 | 5.65E+04 | 2.19E+04 | 3.58E+05 | 3.25E+05 | 4.02E+04 | 1.43E+05 | 8.53E+04 | 1.01E+05 | 1.81E+05 |
| 1855.9   | 63.1     | 3   | 1.26E+05 | 2.17E+05 | 3.53E+05 | 8.15E+04 | 2.08E+05 | 2.94E+05 | 3.08E+04 | 2.42E+05 | 8.81E+04 | 4.55E+04 | 1.37E+05 |
| 1968.0   | 19.9     | 26  | 4.72E+05 | 6.88E+05 | 6.05E+05 | 0.00E+00 | 4.73E+05 | 9.95E+04 | 1.80E+05 | 1.26E+05 | 1.60E+05 | 1.61E+05 | 5.00E+05 |
| 2291.2   | 51.8     | 297 | 1.42E+07 | 2.56E+07 | 2.46E+07 | 6.28E+06 | 3.07E+07 | 2.77E+07 | 8.94E+06 | 1.89E+07 | 6.76E+06 | 7.86E+06 | 1.95E+07 |
| 1802.8   | 38.9     | 22  | 3.30E+05 | 6.16E+05 | 6.82E+05 | 3.36E+05 | 1.02E+06 | 9.99E+05 | 2.95E+05 | 3.01E+05 | 4.51E+05 | 3.74E+05 | 5.77E+05 |
| 1341.7   | 44.3     | 7   | 5.73E+04 | 7.06E+04 | 1.88E+05 | 6.30E+04 | 2.30E+05 | 1.84E+05 | 3.49E+04 | 1.23E+05 | 6.49E+04 | 6.72E+04 | 1.51E+05 |
| 1747.8   | 54.7     | 9   | 4.83E+05 | 7.14E+05 | 4.68E+05 | 5.69E+05 | 1.28E+06 | 1.26E+06 | 3.53E+05 | 7.09E+05 | 4.76E+05 | 4.30E+05 | 8.32E+05 |

14 Supplemental Table S2

| Null-3   | Null-4   | Null-5   | Null-6   | Null-7   | Null-8   | Ratio<br>Null/WT | SD       | p value  | N Ratio | N SD     | N p value | Avg_WT   | Avg_Null |
|----------|----------|----------|----------|----------|----------|------------------|----------|----------|---------|----------|-----------|----------|----------|
| 4.16E+05 | 3.13E+05 | 5.08E+05 | 5.02E+05 | 4.90E+05 | 4.56E+05 | 1.06             | 8.93E-01 | 8.12E-01 | 1.42    | 9.96E-01 | 5.45E-02  | 2.46E+05 | 3.49E+05 |
| 5.37E+05 | 6.77E+05 | 5.91E+05 | 1.30E+06 | 1.04E+06 | 1.24E+06 | 1.14             | 1.09E+00 | 5.90E-01 | 1.41    | 1.19E+00 | 1.14E-01  | 4.29E+05 | 6.07E+05 |
| 1.20E+07 | 6.63E+06 | 6.32E+06 | 1.52E+07 | 1.40E+07 | 7.39E+06 | 1.08             | 1.02E+00 | 7.34E-01 | 1.41    | 1.13E+00 | 9.44E-02  | 4.94E+06 | 6.99E+06 |
| 8.21E+04 | 1.74E+05 | 1.74E+05 | 2.64E+05 | 1.54E+05 | 2.09E+05 | 1.10             | 1.44E+00 | 7.60E-01 | 1.41    | 1.57E+00 | 2.11E-01  | 8.83E+04 | 1.24E+05 |
| 5.11E+06 | 5.64E+06 | 2.37E+06 | 3.96E+06 | 2.41E+06 | 4.84E+06 | 1.11             | 8.70E-01 | 5.85E-01 | 1.41    | 1.35E+00 | 1.58E-01  | 2.36E+06 | 3.31E+06 |
| 1.42E+06 | 1.10E+06 | 1.34E+06 | 1.71E+06 | 1.39E+06 | 2.33E+06 | 1.09             | 8.15E-01 | 6.36E-01 | 1.41    | 8.09E-01 | 2.37E-02  | 8.04E+05 | 1.13E+06 |
| 2.15E+05 | 1.75E+05 | 2.48E+05 | 4.03E+05 | 3.36E+05 | 9.59E+04 | 1.10             | 8.61E-01 | 6.39E-01 | 1.40    | 9.97E-01 | 8.05E-02  | 1.25E+05 | 1.75E+05 |
| 5.82E+05 | 7.41E+05 | 6.95E+05 | 1.10E+06 | 8.11E+05 | 8.99E+05 | 1.11             | 8.48E-01 | 5.85E-01 | 1.39    | 9.48E-01 | 7.06E-02  | 4.42E+05 | 6.16E+05 |
| 7.11E+04 | 5.88E+04 | 5.33E+04 | 8.23E+04 | 5.51E+04 | 1.39E+05 | 1.08             | 1.33E+00 | 8.10E-01 | 1.39    | 1.54E+00 | 2.46E-01  | 4.15E+04 | 5.78E+04 |
| 3.58E+05 | 4.25E+05 | 5.44E+05 | 8.21E+05 | 6.13E+05 | 4.25E+05 | 1.09             | 1.01E+00 | 7.06E-01 | 1.39    | 1.08E+00 | 9.27E-02  | 2.92E+05 | 4.07E+05 |
| 4.29E+04 | 5.15E+04 | 4.98E+04 | 1.11E+05 | 5.43E+04 | 5.45E+04 | 1.06             | 1.22E+00 | 8.49E-01 | 1.39    | 1.34E+00 | 1.71E-01  | 2.78E+04 | 3.87E+04 |
| 3.37E+05 | 3.56E+05 | 2.40E+05 | 4.12E+05 | 2.47E+05 | 6.89E+05 | 1.06             | 9.44E-01 | 7.88E-01 | 1.39    | 9.64E-01 | 7.14E-02  | 2.12E+05 | 2.95E+05 |
| 4.94E+04 | 7.02E+04 | 6.42E+04 | 8.19E+04 | 8.25E+04 | 8.37E+04 | 1.09             | 9.73E-01 | 7.04E-01 | 1.39    | 1.10E+00 | 1.69E-01  | 4.48E+04 | 6.23E+04 |
| 1.99E+06 | 2.44E+06 | 1.92E+06 | 3.49E+06 | 2.77E+06 | 3.05E+06 | 1.07             | 8.72E-01 | 7.48E-01 | 1.38    | 8.25E-01 | 3.47E-02  | 1.30E+06 | 1.80E+06 |
| 5.35E+04 | 3.33E+04 | 1.07E+05 | 9.81E+04 | 7.79E+04 | 5.66E+04 | 1.04             | 1.36E+00 | 9.00E-01 | 1.38    | 1.60E+00 | 3.57E-01  | 5.27E+04 | 7.28E+04 |
| 2.20E+05 | 2.75E+05 | 2.35E+05 | 3.48E+05 | 2.21E+05 | 3.33E+05 | 1.03             | 7.67E-01 | 8.70E-01 | 1.38    | 7.56E-01 | 2.65E-02  | 1.46E+05 | 2.02E+05 |
| 1.55E+05 | 1.31E+05 | 1.73E+05 | 3.76E+05 | 1.70E+05 | 1.06E+05 | 1.08             | 9.71E-01 | 7.34E-01 | 1.38    | 1.19E+00 | 1.50E-01  | 1.03E+05 | 1.41E+05 |
| 9.68E+05 | 6.69E+05 | 8.03E+05 | 1.62E+06 | 1.14E+06 | 1.10E+06 | 1.16             | 9.46E-01 | 4.75E-01 | 1.37    | 1.29E+00 | 1.69E-01  | 5.09E+05 | 6.99E+05 |
| 1.04E+07 | 5.89E+06 | 6.28E+06 | 1.36E+07 | 9.74E+06 | 8.55E+06 | 1.06             | 1.02E+00 | 8.17E-01 | 1.37    | 1.14E+00 | 1.44E-01  | 4.55E+06 | 6.24E+06 |
| 1.12E+05 | 7.72E+04 | 2.07E+05 | 1.42E+05 | 9.33E+04 | 2.38E+04 | 1.03             | 1.26E+00 | 9.32E-01 | 1.37    | 1.60E+00 | 2.86E-01  | 6.52E+04 | 8.92E+04 |
| 8.65E+04 | 5.79E+04 | 8.04E+04 | 1.23E+05 | 8.89E+04 | 8.97E+04 | 1.02             | 7.40E-01 | 9.04E-01 | 1.37    | 7.62E-01 | 3.05E-02  | 4.82E+04 | 6.60E+04 |
| 2.13E+05 | 1.98E+05 | 3.75E+05 | 4.45E+05 | 3.74E+05 | 1.58E+05 | 1.08             | 8.26E-01 | 6.91E-01 | 1.37    | 9.98E-01 | 9.75E-02  | 1.56E+05 | 2.14E+05 |
| 1.03E+05 | 7.68E+04 | 1.96E+05 | 1.78E+05 | 1.74E+05 | 1.14E+05 | 1.02             | 1.28E+00 | 9.42E-01 | 1.36    | 1.45E+00 | 2.36E-01  | 7.69E+04 | 1.05E+05 |
| 6.45E+04 | 2.51E+05 | 2.21E+05 | 2.39E+05 | 4.05E+05 | 2.54E+05 | 1.11             | 1.29E+00 | 7.23E-01 | 1.36    | 1.45E+00 | 2.56E-01  | 1.06E+05 | 1.44E+05 |
| 3.41E+05 | 4.73E+05 | 1.68E+05 | 2.80E+05 | 2.32E+05 | 4.57E+05 | 1.05             | 1.28E+00 | 8.79E-01 | 1.36    | 1.60E+00 | 2.82E-01  | 1.80E+05 | 2.45E+05 |
| 1.33E+07 | 1.81E+07 | 1.49E+07 | 3.57E+07 | 2.32E+07 | 2.19E+07 | 1.06             | 1.01E+00 | 7.95E-01 | 1.36    | 1.06E+00 | 1.20E-01  | 1.03E+07 | 1.40E+07 |
| 4.69E+05 | 4.48E+05 | 4.99E+05 | 8.55E+05 | 7.38E+05 | 7.50E+05 | 1.05             | 8.55E-01 | 7.94E-01 | 1.36    | 7.96E-01 | 4.68E-02  | 3.19E+05 | 4.33E+05 |
| 8.56E+04 | 1.35E+05 | 8.49E+04 | 1.51E+05 | 1.39E+05 | 1.22E+05 | 1.04             | 9.45E-01 | 8.75E-01 | 1.36    | 9.77E-01 | 9.59E-02  | 6.38E+04 | 8.65E+04 |
| 6.10E+05 | 5.50E+05 | 7.02E+05 | 1.36E+06 | 9.61E+05 | 4.71E+05 | 1.05             | 9.53E-01 | 8.12E-01 | 1.35    | 9.80E-01 | 1.07E-01  | 4.03E+05 | 5.46E+05 |

14 Supplemental Table S2

| Accession # | Protein                                                  | # of Pep | PEPTIDE                              | Modification                                  | XCorr | Charge | m/z [Da] |
|-------------|----------------------------------------------------------|----------|--------------------------------------|-----------------------------------------------|-------|--------|----------|
| 6754164     | Complement C5                                            | 1        | SITHDTDGVAVFVLNLPSNVTVLK             | Deamidated(19)                                | 6.85  | 3      | 847.5    |
| 161086902   | Voltage-dependent calcium channel subunit alpha-2/delta- | 6        | SLDNDNYVFTAPYFNK                     | Deamidated(15)                                | 4.31  | 2      | 954.9    |
| 568915857   | Phospholipid transfer protein                            | 4        | GHFYINISDVR                          | Deamidated(6)                                 | 3.79  | 2      | 686.3    |
| 156616286   | Collagen alpha-6(VI) chain                               | 11       | TEFNLTYSYSSK                         | Deamidated(4)                                 | 3.91  | 2      | 639.3    |
| 568995969   | Fetuin-B                                                 | 1        | VLYLPAYNCTLRPVSK                     | Carbamidomethyl(9)Deamidated(8)               | 4.35  | 3      | 632.3    |
| 340745359   | Hemolytic complement-like                                | 2        | VGAPENVTVQAHGHTAEFDTTVSVK            | Deamidated(6)                                 | 5.54  | 4      | 649.6    |
| 755495403   | Antithrombin-III                                         | 3        | LGACNDTLK                            | Carbamidomethyl(4)Deamidated(5)               | 2.54  | 2      | 496.7    |
| 122937370   | Multimerin-2                                             | 4        | FNTTSINVGSSYFPEHGYFR                 | Deamidated(2)                                 | 6.28  | 3      | 775.4    |
| 113195678   | Lysosomal-associated membrane protein 1                  | 7        | ALELQFGMNASSSLFFLQGVK                | Deamidated(9)Oxidation(8)                     | 4.76  | 3      | 778.1    |
| 568935054   | Alpha-type platelet-derived growth factor receptor       | 1        | IVQLNSSFSLR                          | Deamidated(5)                                 | 3.16  | 2      | 632.8    |
| 161016843   | Desmoglein-2                                             | 4        | NTGELNITSILDREETPYFLLTGYALDSR        | Deamidated(1)Deamidated(6)                    | 5.74  | 3      | 1101.6   |
| 31543108    | Lysosome-associated membrane glycoprotein 2              | 4        | EASHYSIHDIVLSYNTSDSTVFPGAVAK         | Deamidated(15)                                | 8.48  | 4      | 753.1    |
| 506326690   | Prion-like protein doppel                                | 1        | EMLVTSCVNATQAANQAEFSR                | Carbamidomethyl(7)Deamidated(9)Oxidation(2)   | 5.77  | 3      | 782.0    |
| 27370240    | Leucyl-cystinyl aminopeptidase                           | 8        | LPTAIPLCYELSLHPNLTSMTFR              | Carbamidomethyl(9)Deamidated(17)Oxidation(21) | 5.76  | 3      | 935.5    |
| 568920137   | Laminin subunit alpha-5                                  | 15       | GDTVAPGSEGLLNLPDDFVFYVGGYPSNFTPPEPLR | Deamidated(29)                                | 6.01  | 3      | 1326.0   |
| 11230798    | Programmed cell death 1 ligand 1                         | 1        | TEGMLLNVTSSLR                        | Deamidated(7)Oxidation(4)                     | 3.81  | 2      | 719.4    |
| 113195678   | Lysosomal-associated membrane protein 1                  | 7        | YSVQHMYFTYNLSDTEHFPNAISK             | Deamidated(11)Deamidated(20)Oxidation(6)      | 4.64  | 4      | 727.8    |
| 170295823   | Vascular cell adhesion protein 1                         | 1        | QLNNGELQPLSENTTLTFMSTK               | Deamidated(4)Deamidated(13)Oxidation(19)      | 3.57  | 2      | 1242.6   |
| 6755987     | Vitronectin                                              | 3        | NGSLFAFR                             | Deamidated(1)                                 | 2.51  | 2      | 456.7    |
| 30520239    | Neutral cholesterol ester hydrolase 1                    | 1        | GNYDFVEAMIVNNHTSLDVER                | Deamidated(12)Deamidated(13)Oxidation(9)      | 7.93  | 3      | 814.0    |
| 225735655   | prosaposin                                               | 7        | LVLYLEHNLEKNSTK                      | Deamidated(12)                                | 4.89  | 3      | 601.3    |
| 41282022    | Calumenin isoform 2                                      | 1        | NVTYGTYLDDPDPDDGFNYK                 | Deamidated(1)                                 | 4.9   | 2      | 1155.5   |
| 117168301   | Laminin subunit alpha-1                                  | 1        | AFMTVDGQESPSVTVVGNATTLDV ER          | Deamidated(18)Oxidation(3)                    | 4.67  | 3      | 914.1    |
| 9055172     | ATPase, H+ transporting, lysosomal accessory protein     | 2        | LNASLPALLIR                          | Deamidated(2)                                 | 3.84  | 2      | 647.9    |
| 156616286   | Collagen alpha-6(VI) chain                               | 11       | LGNFSELATHNQTFK                      | Deamidated(3)Deamidated(11)                   | 6.14  | 3      | 608.0    |

| MH+ [Da] | RT [min] | PSM | WT-1     | WT-2     | WT-3     | WT-4     | WT-5     | WT-5-2   | WT-6     | WT-7     | WT-8     | Null-1   | Null-2   |
|----------|----------|-----|----------|----------|----------|----------|----------|----------|----------|----------|----------|----------|----------|
| 2540.4   | 62.1     | 28  | 3.69E+05 | 6.08E+05 | 7.81E+05 | 3.34E+05 | 6.28E+05 | 5.12E+05 | 6.24E+04 | 1.65E+05 | 2.82E+05 | 1.67E+05 | 6.64E+05 |
| 1908.9   | 51.5     | 28  | 3.13E+05 | 2.43E+05 | 4.62E+05 | 1.78E+05 | 7.41E+05 | 7.51E+05 | 1.71E+05 | 4.94E+05 | 3.10E+05 | 3.22E+05 | 7.13E+05 |
| 1371.6   | 35.3     | 33  | 5.50E+05 | 6.47E+05 | 9.30E+05 | 3.04E+05 | 1.48E+06 | 1.31E+06 | 5.23E+05 | 4.86E+05 | 4.56E+05 | 3.41E+05 | 9.56E+05 |
| 1277.6   | 37.1     | 24  | 8.66E+05 | 7.31E+05 | 1.49E+06 | 6.69E+05 | 1.97E+06 | 1.90E+06 | 7.61E+05 | 1.04E+06 | 6.34E+05 | 8.45E+05 | 1.45E+06 |
| 1895.0   | 42.6     | 19  | 2.27E+05 | 4.74E+05 | 5.15E+05 | 1.60E+05 | 9.53E+05 | 8.10E+05 | 2.33E+05 | 2.36E+05 | 2.46E+05 | 2.20E+05 | 5.65E+05 |
| 2595.3   | 32.0     | 2   | 3.89E+04 | 8.74E+04 | 1.08E+05 | 5.48E+04 | 8.19E+04 | 8.68E+04 | 1.11E+04 | 4.68E+04 | 4.49E+04 | 3.12E+04 | 9.20E+04 |
| 992.5    | 24.1     | 15  | 3.92E+05 | 9.33E+05 | 1.00E+06 | 5.40E+03 | 1.97E+06 | 1.92E+06 | 3.37E+05 | 1.82E+05 | 2.11E+05 | 2.11E+05 | 3.94E+05 |
| 2324.1   | 47.3     | 17  | 3.09E+05 | 2.84E+05 | 5.11E+05 | 2.29E+05 | 8.49E+05 | 8.06E+05 | 1.82E+05 | 3.94E+05 | 2.27E+05 | 2.66E+05 | 4.76E+05 |
| 2332.2   | 65.2     | 57  | 2.00E+05 | 3.13E+05 | 6.00E+05 | 1.67E+05 | 2.69E+05 | 1.66E+05 | 4.57E+04 | 2.72E+05 | 6.86E+04 | 3.85E+04 | 1.55E+05 |
| 1264.7   | 43.8     | 4   | 4.49E+04 | 5.52E+04 | 9.21E+04 | 4.41E+04 | 4.52E+04 | 6.67E+04 | 4.50E+03 | 1.02E+05 | 3.26E+04 | 0.00E+00 | 1.11E+05 |
| 3302.6   | 69.4     | 12  | 4.72E+04 | 2.81E+04 | 1.68E+05 | 2.87E+04 | 1.65E+05 | 1.59E+05 | 4.87E+03 | 9.34E+04 | 3.30E+04 | 1.82E+04 | 6.54E+04 |
| 3009.5   | 48.0     | 69  | 4.44E+06 | 3.88E+06 | 5.05E+06 | 2.30E+06 | 5.69E+06 | 4.80E+06 | 9.23E+05 | 3.14E+06 | 1.96E+06 | 2.09E+06 | 4.48E+06 |
| 2344.1   | 38.1     | 21  | 2.08E+05 | 2.29E+05 | 2.96E+05 | 1.48E+05 | 4.00E+05 | 3.80E+05 | 1.77E+05 | 2.10E+05 | 1.13E+05 | 1.59E+05 | 3.34E+05 |
| 2804.4   | 59.8     | 15  | 3.10E+05 | 3.25E+05 | 8.05E+05 | 1.45E+05 | 6.04E+05 | 5.34E+05 | 4.65E+04 | 3.99E+05 | 1.91E+05 | 8.32E+04 | 5.33E+05 |
| 3975.9   | 67.2     | 17  | 9.82E+04 | 1.08E+05 | 2.72E+05 | 4.85E+04 | 2.38E+05 | 1.72E+05 | 3.16E+03 | 1.35E+05 | 6.91E+04 | 5.35E+04 | 1.63E+05 |
| 1437.7   | 43.5     | 10  | 1.18E+05 | 1.03E+05 | 2.07E+05 | 6.51E+04 | 1.89E+05 | 1.33E+05 | 8.30E+04 | 1.01E+05 | 7.45E+04 | 9.00E+04 | 2.36E+05 |
| 2908.3   | 41.8     | 175 | 1.18E+07 | 1.26E+07 | 1.83E+07 | 6.60E+06 | 1.80E+07 | 1.62E+07 | 4.62E+06 | 1.07E+07 | 7.45E+06 | 6.74E+06 | 1.36E+07 |
| 2484.2   | 49.6     | 2   | 6.81E+04 | 1.13E+05 | 1.62E+05 | 5.97E+04 | 1.05E+05 | 1.22E+05 | 4.30E+04 | 8.94E+04 | 6.39E+04 | 5.41E+04 | 9.02E+04 |
| 912.5    | 50.8     | 13  | 4.42E+05 | 6.80E+05 | 7.75E+05 | 4.55E+05 | 9.63E+05 | 9.16E+05 | 3.44E+05 | 2.93E+05 | 5.31E+05 | 4.97E+05 | 5.31E+05 |
| 2440.1   | 45.4     | 110 | 2.72E+06 | 1.84E+06 | 3.68E+06 | 1.23E+06 | 4.79E+06 | 4.31E+06 | 7.04E+05 | 2.61E+06 | 1.62E+06 | 1.53E+06 | 4.08E+06 |
| 1802.0   | 34.3     | 48  | 7.61E+05 | 9.19E+05 | 9.62E+05 | 4.09E+05 | 1.70E+06 | 1.58E+06 | 4.15E+05 | 7.18E+05 | 2.97E+05 | 4.36E+05 | 9.87E+05 |
| 2310.0   | 50.3     | 8   | 2.04E+05 | 4.21E+05 | 3.08E+05 | 1.20E+05 | 5.55E+05 | 4.46E+05 | 1.92E+05 | 2.03E+05 | 1.31E+05 | 1.12E+05 | 2.50E+05 |
| 2740.3   | 47.6     | 6   | 1.26E+05 | 2.53E+05 | 2.40E+05 | 1.15E+05 | 1.65E+05 | 1.86E+05 | 3.24E+04 | 5.51E+04 | 2.75E+04 | 8.51E+04 | 1.34E+05 |
| 1294.8   | 62.9     | 17  | 2.09E+05 | 2.87E+05 | 4.32E+05 | 1.43E+05 | 4.48E+05 | 4.76E+05 | 8.20E+04 | 2.75E+05 | 2.01E+05 | 1.57E+05 | 3.74E+05 |
| 1821.9   | 44.5     | 32  | 1.01E+06 | 1.24E+06 | 2.52E+06 | 7.41E+05 | 3.20E+06 | 3.02E+06 | 8.86E+05 | 1.98E+06 | 9.24E+05 | 1.14E+06 | 2.44E+06 |

14 Supplemental Table S2



| Null-3   | Null-4   | Null-5   | Null-6   | Null-7   | Null-8   | Ratio<br>Null/WT | SD       | p value  | N Ratio | N SD     | N p value | Avg_WT   | Avg_Null |
|----------|----------|----------|----------|----------|----------|------------------|----------|----------|---------|----------|-----------|----------|----------|
| 4.30E+05 | 3.60E+05 | 2.92E+05 | 5.23E+05 | 3.34E+05 | 7.09E+05 | 1.05             | 1.04E+00 | 8.53E-01 | 1.35    | 1.16E+00 | 1.64E-01  | 2.36E+05 | 3.19E+05 |
| 2.97E+05 | 3.14E+05 | 4.39E+05 | 4.96E+05 | 5.21E+05 | 3.10E+05 | 1.05             | 9.31E-01 | 8.33E-01 | 1.34    | 1.04E+00 | 1.26E-01  | 2.37E+05 | 3.18E+05 |
| 4.53E+05 | 5.22E+05 | 8.57E+05 | 8.90E+05 | 9.48E+05 | 1.21E+06 | 1.04             | 9.75E-01 | 8.70E-01 | 1.34    | 9.22E-01 | 9.09E-02  | 4.17E+05 | 5.61E+05 |
| 8.39E+05 | 1.14E+06 | 1.04E+06 | 1.57E+06 | 1.06E+06 | 1.13E+06 | 1.02             | 7.16E-01 | 9.31E-01 | 1.34    | 6.97E-01 | 2.94E-02  | 6.32E+05 | 8.49E+05 |
| 3.69E+05 | 3.72E+05 | 4.12E+05 | 6.96E+05 | 2.57E+05 | 5.48E+05 | 1.00             | 1.05E+00 | 9.89E-01 | 1.34    | 1.10E+00 | 1.51E-01  | 2.38E+05 | 3.19E+05 |
| 5.52E+04 | 4.39E+04 | 5.64E+04 | 8.54E+04 | 4.66E+04 | 1.16E+05 | 1.06             | 9.83E-01 | 8.05E-01 | 1.34    | 1.05E+00 | 1.46E-01  | 3.61E+04 | 4.83E+04 |
| 4.19E+05 | 9.06E+05 | 1.02E+06 | 8.56E+05 | 4.35E+05 | 1.74E+06 | 0.97             | 1.57E+00 | 9.36E-01 | 1.34    | 1.90E+00 | 4.04E-01  | 4.09E+05 | 5.47E+05 |
| 4.07E+05 | 3.42E+05 | 4.72E+05 | 5.93E+05 | 4.67E+05 | 3.45E+05 | 1.00             | 8.38E-01 | 9.97E-01 | 1.33    | 8.85E-01 | 8.60E-02  | 2.36E+05 | 3.15E+05 |
| 1.49E+05 | 1.30E+05 | 1.74E+05 | 5.15E+05 | 4.84E+05 | 3.79E+05 | 1.08             | 1.53E+00 | 8.18E-01 | 1.33    | 1.68E+00 | 3.80E-01  | 1.33E+05 | 1.77E+05 |
| 3.16E+04 | 5.63E+04 | 3.24E+04 | 1.22E+05 | 4.08E+04 | 9.41E+04 | 1.13             | 1.42E+00 | 7.14E-01 | 1.33    | 1.71E+00 | 4.02E-01  | 3.27E+04 | 4.33E+04 |
| 5.72E+04 | 2.98E+04 | 9.49E+04 | 1.66E+05 | 1.61E+05 | 7.43E+04 | 1.03             | 1.53E+00 | 9.34E-01 | 1.32    | 1.71E+00 | 3.80E-01  | 4.48E+04 | 5.94E+04 |
| 3.14E+06 | 3.06E+06 | 2.84E+06 | 6.20E+06 | 3.84E+06 | 3.63E+06 | 1.02             | 8.07E-01 | 9.03E-01 | 1.32    | 8.13E-01 | 7.49E-02  | 2.04E+06 | 2.70E+06 |
| 2.24E+05 | 2.27E+05 | 1.52E+05 | 2.82E+05 | 1.91E+05 | 3.55E+05 | 1.00             | 7.33E-01 | 9.90E-01 | 1.32    | 7.02E-01 | 4.93E-02  | 1.35E+05 | 1.79E+05 |
| 1.84E+05 | 3.29E+05 | 3.70E+05 | 5.53E+05 | 6.56E+05 | 4.28E+05 | 1.05             | 1.19E+00 | 8.62E-01 | 1.32    | 1.27E+00 | 2.47E-01  | 2.13E+05 | 2.80E+05 |
| 7.85E+04 | 1.16E+05 | 1.06E+05 | 2.13E+05 | 1.61E+05 | 1.54E+05 | 1.03             | 1.12E+00 | 9.20E-01 | 1.31    | 1.16E+00 | 2.14E-01  | 7.23E+04 | 9.48E+04 |
| 7.15E+04 | 8.55E+04 | 1.10E+05 | 1.46E+05 | 1.26E+05 | 9.73E+04 | 1.01             | 8.61E-01 | 9.64E-01 | 1.31    | 9.23E-01 | 1.65E-01  | 6.82E+04 | 8.93E+04 |
| 9.88E+06 | 1.08E+07 | 1.01E+07 | 1.95E+07 | 1.36E+07 | 1.22E+07 | 1.02             | 7.50E-01 | 9.06E-01 | 1.31    | 7.37E-01 | 6.21E-02  | 6.79E+06 | 8.89E+06 |
| 6.82E+04 | 8.09E+04 | 6.46E+04 | 2.10E+05 | 1.51E+05 | 5.27E+04 | 1.05             | 1.03E+00 | 8.44E-01 | 1.31    | 1.11E+00 | 2.44E-01  | 5.37E+04 | 7.03E+04 |
| 1.03E+06 | 4.70E+05 | 5.03E+05 | 6.79E+05 | 4.61E+05 | 5.07E+05 | 0.97             | 7.15E-01 | 8.85E-01 | 1.31    | 1.05E+00 | 2.18E-01  | 3.46E+05 | 4.52E+05 |
| 2.16E+06 | 1.91E+06 | 2.54E+06 | 3.56E+06 | 3.07E+06 | 2.16E+06 | 1.01             | 8.76E-01 | 9.80E-01 | 1.31    | 9.18E-01 | 1.29E-01  | 1.49E+06 | 1.95E+06 |
| 5.28E+05 | 8.83E+05 | 6.95E+05 | 1.53E+06 | 8.23E+05 | 9.15E+05 | 0.99             | 9.59E-01 | 9.54E-01 | 1.31    | 9.82E-01 | 1.56E-01  | 4.77E+05 | 6.24E+05 |
| 1.94E+05 | 2.96E+05 | 2.32E+05 | 5.97E+05 | 3.25E+05 | 3.07E+05 | 1.01             | 1.04E+00 | 9.73E-01 | 1.31    | 1.08E+00 | 2.13E-01  | 1.61E+05 | 2.10E+05 |
| 2.42E+05 | 7.23E+04 | 7.37E+04 | 1.11E+05 | 1.03E+05 | 1.87E+05 | 0.94             | 1.05E+00 | 8.35E-01 | 1.30    | 1.53E+00 | 3.67E-01  | 7.36E+04 | 9.60E+04 |
| 2.64E+05 | 2.04E+05 | 2.55E+05 | 3.95E+05 | 3.55E+05 | 3.19E+05 | 1.02             | 8.07E-01 | 9.07E-01 | 1.30    | 8.13E-01 | 9.35E-02  | 1.64E+05 | 2.14E+05 |
| 1.24E+06 | 1.71E+06 | 1.61E+06 | 2.14E+06 | 1.69E+06 | 1.73E+06 | 0.99             | 8.08E-01 | 9.74E-01 | 1.30    | 8.54E-01 | 1.14E-01  | 9.80E+05 | 1.28E+06 |

14 Supplemental Table S2

| Accession # | Protein                                                     | # of Pep | PEPTIDE                               | Modification                             | XCorr | Charge | m/z [Da] |
|-------------|-------------------------------------------------------------|----------|---------------------------------------|------------------------------------------|-------|--------|----------|
| 568953122   | Insulin receptor                                            | 4        | SDIIVQTDATNPSVPLDPISVSNSS<br>SQILK    | Deamidated(24)                           | 4.52  | 3      | 1134.9   |
| 568906655   | Transmembrane protein 182                                   | 1        | GEHNSTSYDSAIYR                        | Deamidated(4)                            | 4.09  | 3      | 571.9    |
| 755532856   | Laminin, alpha 2                                            | 17       | NESGIILLGSGGTLTPPR                    | Deamidated(1)                            | 4.94  | 2      | 892.0    |
| 114326497   | Laminin subunit beta-1                                      | 6        | QADEDIQGTQNLLTSIESETAASEET<br>LTNASQR | Deamidated(11)Deamidated(29)             | 7.95  | 3      | 1184.6   |
| 9790019     | Acid ceramidase                                             | 2        | NLSFATIYDVLSTKPVLNK                   | Deamidated(1)                            | 5.04  | 3      | 708.7    |
| 755504148   | Lysosomal protein NCU-G1                                    | 2        | LLEFDSTNASEGAQPPGKPYPPYSL<br>AK       | Deamidated(8)                            | 5.71  | 3      | 960.1    |
| 219521935   | Histocompatibility 2, Q region<br>locus 4                   | 2        | EQNYTCHVHHEGLPEPLTLR                  | Carbamidomethyl(6)Deamidated(3)          | 4.26  | 3      | 811.1    |
| 568922760   | Immunoglobulin superfamily<br>member 10                     | 6        | ITVHQNGTLEIR                          | Deamidated(6)                            | 3.09  | 3      | 461.3    |
| 568956041   | Cadherin-13                                                 | 6        | NLSVVILGASDKDLHPNTDPFKFEIH<br>K       | Deamidated(1)                            | 4.7   | 4      | 759.7    |
| 6755775     | Transforming growth factor<br>beta-1                        | 2        | DISHSIYMFNTSDIR                       | Deamidated(11)Oxidation(8)               | 4.52  | 3      | 655.0    |
| 22203747    | Collagen alpha-2(VI) chain                                  | 6        | MALLQYGSQNNQQVAFPLTYNVTTI<br>HEALER   | Deamidated(10)Deamidated(21)Oxidation(1) | 5.71  | 4      | 895.7    |
| 568971816   | Intercellular adhesion<br>molecule 2                        | 6        | ETLKNQTFGGAETVPQEATATFNST<br>ALK      | Deamidated(5)Deamidated(23)              | 4.44  | 3      | 986.2    |
| 568983003   | Cathepsin L                                                 | 1        | AEFAVANDTGFVDIPQKEK                   | Deamidated(7)                            | 4.74  | 3      | 694.0    |
| 6753556     | Cathepsin D                                                 | 1        | NGTSFDIHYGSGSLSGYLSQDTVSV<br>PCK      | Carbamidomethyl(27)Deamidated(1)         | 4.22  | 3      | 993.1    |
| 755509347   | Mannan-binding lectin serine<br>protease 2                  | 2        | VLATLCGQESTDTEQAPGNDFYSL<br>GPSLK     | Carbamidomethyl(6)Deamidated(19)         | 5.84  | 3      | 1067.5   |
| 148747408   | Laminin subunit alpha-4                                     | 7        | NLTEVVPQLLDQLR                        | Deamidated(1)                            | 4.49  | 2      | 820.0    |
| 160333710   | Serine protease inhibitor A3M                               | 2        | LLNDYVSNQTQGMK                        | Deamidated(8)Oxidation(13)               | 4.23  | 2      | 870.9    |
| 113195678   | Lysosomal-associated<br>membrane protein 1                  | 7        | GYLLTLNFTK                            | Deamidated(7)                            | 2.82  | 2      | 585.8    |
| 161086902   | Voltage-dependent calcium<br>channel subunit alpha-2/delta- | 6        | EYCNDLKPSDNNTFLNFNEFIDR               | Carbamidomethyl(3)Deamidated(11)         | 3.46  | 3      | 1036.8   |
| 110347469   | Alpha-2-macroglobulin                                       | 5        | VNLSFPSAQSLPASDTHLK                   | Deamidated(2)                            | 5.26  | 3      | 671.7    |
| 237757322   | Complement factor H-related<br>protein                      | 1        | EFQHNMSTMYK                           | Deamidated(5)Oxidation(8)                | 2.77  | 2      | 732.8    |
| 568911077   | Nicastrin                                                   | 4        | ALYELAGGTNFSSSIQADPQTVTR              | Deamidated(10)                           | 5.92  | 3      | 843.1    |
| 19526900    | cell cycle control protein 50A                              | 2        | DDLHPTLPAGQYFLNITYNYPVHSF<br>DGR      | Deamidated(15)Deamidated(19)             | 7.98  | 4      | 813.6    |
| 568954797   | Teneurin-3                                                  | 2        | LGGFTHENNTIDSGELDGR                   | Deamidated(9)                            | 3.83  | 3      | 716.0    |
| 568991301   | Plexin B2                                                   | 10       | LSHDGNETLPLHLYVK                      | Deamidated(6)                            | 4.09  | 3      | 613.0    |
| 344217723   | Agrin                                                       | 1        | NELMLNSSLMR                           | Deamidated(6)Oxidation(4)Oxidation(10)   | 3.12  | 2      | 670.8    |

| MH+ [Da] | RT [min] | PSM | WT-1     | WT-2     | WT-3     | WT-4     | WT-5     | WT-5-2   | WT-6     | WT-7     | WT-8     | Null-1   | Null-2   |
|----------|----------|-----|----------|----------|----------|----------|----------|----------|----------|----------|----------|----------|----------|
| 3402.8   | 60.8     | 14  | 5.68E+04 | 4.91E+04 | 1.83E+05 | 3.77E+04 | 2.21E+05 | 2.00E+05 | 1.17E+04 | 1.31E+05 | 6.73E+04 | 3.30E+04 | 1.88E+05 |
| 1713.8   | 31.0     | 16  | 9.29E+04 | 7.41E+04 | 2.57E+05 | 6.31E+04 | 3.19E+05 | 2.62E+05 | 1.05E+05 | 1.52E+05 | 1.34E+05 | 1.07E+05 | 2.11E+05 |
| 1783.0   | 54.2     | 24  | 3.33E+05 | 4.74E+05 | 7.31E+05 | 1.80E+05 | 7.82E+05 | 6.78E+05 | 3.06E+05 | 3.96E+05 | 2.72E+05 | 3.00E+05 | 5.31E+05 |
| 3551.7   | 63.7     | 117 | 6.93E+05 | 8.48E+05 | 1.64E+06 | 5.30E+05 | 1.73E+06 | 1.58E+06 | 2.39E+05 | 7.64E+05 | 5.86E+05 | 5.26E+05 | 1.28E+06 |
| 2124.2   | 63.9     | 18  | 2.02E+05 | 3.27E+05 | 3.59E+05 | 7.92E+04 | 4.05E+05 | 3.89E+05 | 5.86E+04 | 3.05E+05 | 1.06E+05 | 9.16E+04 | 2.53E+05 |
| 2878.4   | 43.9     | 30  | 5.57E+05 | 5.62E+05 | 7.03E+05 | 2.86E+05 | 9.02E+05 | 7.99E+05 | 2.68E+05 | 4.25E+05 | 3.44E+05 | 3.88E+05 | 6.10E+05 |
| 2431.1   | 33.0     | 6   | 9.07E+04 | 1.36E+05 | 3.00E+05 | 4.30E+04 | 3.52E+05 | 3.44E+05 | 1.15E+05 | 8.04E+04 | 6.78E+04 | 7.80E+04 | 2.46E+05 |
| 1381.7   | 30.1     | 13  | 4.04E+05 | 7.46E+04 | 3.42E+05 | 2.57E+05 | 9.69E+05 | 1.07E+06 | 9.40E+04 | 3.42E+05 | 2.84E+05 | 4.44E+05 | 4.77E+05 |
| 3035.6   | 48.6     | 9   | 8.17E+04 | 6.23E+04 | 2.08E+05 | 6.58E+04 | 2.62E+05 | 2.36E+05 | 9.14E+03 | 1.65E+05 | 5.31E+04 | 7.33E+04 | 1.96E+05 |
| 1962.9   | 57.8     | 31  | 3.70E+05 | 6.64E+05 | 8.12E+05 | 2.98E+05 | 8.30E+05 | 7.36E+05 | 1.15E+05 | 4.84E+05 | 2.98E+05 | 3.51E+05 | 5.66E+05 |
| 3579.8   | 56.7     | 301 | 9.85E+06 | 9.58E+06 | 1.94E+07 | 9.07E+06 | 2.73E+07 | 2.45E+07 | 1.41E+06 | 1.87E+07 | 7.16E+06 | 5.24E+06 | 1.98E+07 |
| 2956.5   | 45.8     | 16  | 1.55E+05 | 1.63E+05 | 3.10E+05 | 9.24E+04 | 7.09E+05 | 6.08E+05 | 1.44E+05 | 4.64E+05 | 1.62E+05 | 1.81E+05 | 5.53E+05 |
| 2080.0   | 47.8     | 56  | 6.21E+05 | 7.45E+05 | 8.92E+05 | 3.48E+05 | 1.23E+06 | 1.04E+06 | 5.04E+05 | 4.61E+05 | 4.19E+05 | 4.01E+05 | 8.38E+05 |
| 2977.4   | 50.2     | 20  | 1.48E+05 | 1.83E+05 | 2.91E+05 | 7.95E+04 | 3.93E+05 | 3.82E+05 | 2.58E+04 | 1.80E+05 | 8.46E+04 | 4.89E+04 | 2.25E+05 |
| 3200.5   | 52.1     | 8   | 5.34E+04 | 1.25E+05 | 1.79E+05 | 5.95E+04 | 1.46E+05 | 1.75E+05 | 2.70E+04 | 5.01E+04 | 7.45E+04 | 5.83E+04 | 1.40E+05 |
| 1638.9   | 69.5     | 55  | 2.66E+05 | 4.70E+05 | 7.22E+05 | 1.82E+05 | 8.68E+05 | 7.21E+05 | 1.52E+05 | 4.77E+05 | 2.26E+05 | 1.56E+05 | 7.32E+05 |
| 1740.8   | 34.5     | 34  | 1.67E+05 | 3.27E+05 | 3.65E+05 | 2.17E+05 | 5.20E+05 | 4.80E+05 | 3.22E+05 | 1.86E+05 | 4.87E+05 | 2.11E+05 | 3.63E+05 |
| 1170.6   | 53.0     | 81  | 7.26E+06 | 9.27E+06 | 1.27E+07 | 4.35E+06 | 1.21E+07 | 1.24E+07 | 2.84E+06 | 9.60E+06 | 4.20E+06 | 3.26E+06 | 1.23E+07 |
| 3108.4   | 60.6     | 13  | 4.89E+04 | 5.36E+04 | 1.19E+05 | 1.97E+04 | 1.79E+05 | 1.63E+05 | 8.60E+03 | 9.49E+04 | 3.76E+04 | 1.98E+04 | 1.42E+05 |
| 2013.0   | 42.6     | 36  | 1.95E+06 | 3.00E+06 | 3.50E+06 | 2.27E+06 | 4.40E+06 | 3.58E+06 | 1.77E+06 | 2.63E+06 | 3.24E+06 | 1.60E+06 | 3.36E+06 |
| 1464.6   | 22.4     | 15  | 3.11E+05 | 3.09E+05 | 4.75E+05 | 1.71E+03 | 6.89E+05 | 6.35E+05 | 2.91E+05 | 1.65E+05 | 1.81E+05 | 1.91E+05 | 3.22E+05 |
| 2527.2   | 49.0     | 11  | 1.93E+05 | 2.45E+05 | 1.75E+05 | 1.74E+04 | 4.52E+05 | 2.82E+05 | 3.60E+04 | 2.84E+05 | 2.01E+05 | 8.64E+04 | 2.90E+05 |
| 3251.5   | 59.0     | 16  | 2.74E+05 | 3.67E+05 | 6.18E+05 | 1.46E+05 | 4.43E+05 | 3.90E+05 | 2.68E+04 | 3.08E+05 | 2.41E+05 | 1.24E+05 | 4.18E+05 |
| 2146.0   | 39.8     | 2   | 2.96E+05 | 2.33E+05 | 2.87E+05 | 3.41E+05 | 3.52E+05 | 4.17E+05 | 1.51E+05 | 3.17E+05 | 2.45E+05 | 2.08E+05 | 2.58E+05 |
| 1836.9   | 38.0     | 21  | 3.94E+05 | 5.11E+05 | 5.69E+05 | 1.56E+05 | 5.96E+05 | 5.04E+05 | 2.68E+05 | 3.74E+05 | 2.64E+05 | 2.09E+05 | 5.35E+05 |
| 1340.6   | 35.1     | 20  | 1.28E+06 | 9.95E+05 | 1.57E+06 | 7.98E+05 | 2.41E+06 | 2.37E+06 | 8.85E+05 | 1.21E+06 | 7.51E+05 | 9.67E+05 | 1.70E+06 |

14 Supplemental Table S2

| Null-3   | Null-4   | Null-5   | Null-6   | Null-7   | Null-8   | Ratio<br>Null/WT | SD       | p value  | N Ratio | N SD     | N p value | Avg_WT   | Avg_Null |
|----------|----------|----------|----------|----------|----------|------------------|----------|----------|---------|----------|-----------|----------|----------|
| 7.05E+04 | 7.48E+04 | 1.09E+05 | 1.56E+05 | 1.32E+05 | 1.05E+05 | 1.02             | 1.22E+00 | 9.51E-01 | 1.30    | 1.35E+00 | 3.00E-01  | 6.06E+04 | 7.89E+04 |
| 1.23E+05 | 1.54E+05 | 2.04E+05 | 1.96E+05 | 1.89E+05 | 1.06E+05 | 0.99             | 8.49E-01 | 9.79E-01 | 1.30    | 9.61E-01 | 1.56E-01  | 9.32E+04 | 1.21E+05 |
| 2.97E+05 | 3.57E+05 | 3.50E+05 | 8.73E+05 | 6.75E+05 | 3.60E+05 | 1.01             | 9.33E-01 | 9.52E-01 | 1.30    | 9.12E-01 | 1.52E-01  | 2.63E+05 | 3.42E+05 |
| 8.20E+05 | 8.39E+05 | 7.59E+05 | 1.43E+06 | 9.93E+05 | 9.42E+05 | 0.99             | 8.71E-01 | 9.69E-01 | 1.30    | 8.82E-01 | 1.28E-01  | 5.41E+05 | 7.02E+05 |
| 1.42E+05 | 2.35E+05 | 1.47E+05 | 5.58E+05 | 4.02E+05 | 2.35E+05 | 1.04             | 1.20E+00 | 8.90E-01 | 1.30    | 1.30E+00 | 3.13E-01  | 1.42E+05 | 1.85E+05 |
| 4.65E+05 | 5.70E+05 | 3.75E+05 | 7.55E+05 | 5.46E+05 | 5.66E+05 | 0.99             | 6.52E-01 | 9.63E-01 | 1.29    | 6.29E-01 | 4.16E-02  | 3.08E+05 | 3.99E+05 |
| 1.12E+05 | 1.11E+05 | 1.42E+05 | 1.24E+05 | 1.58E+05 | 3.40E+05 | 0.96             | 1.22E+00 | 9.07E-01 | 1.29    | 1.31E+00 | 3.06E-01  | 9.22E+04 | 1.19E+05 |
| 3.42E+05 | 2.39E+05 | 5.12E+05 | 6.99E+05 | 3.82E+05 | 9.26E+04 | 0.94             | 1.21E+00 | 8.43E-01 | 1.29    | 1.46E+00 | 3.59E-01  | 2.36E+05 | 3.05E+05 |
| 6.67E+04 | 8.18E+04 | 9.37E+04 | 2.32E+05 | 2.09E+05 | 5.66E+04 | 0.99             | 1.29E+00 | 9.84E-01 | 1.29    | 1.43E+00 | 3.57E-01  | 7.12E+04 | 9.16E+04 |
| 5.33E+05 | 4.51E+05 | 4.48E+05 | 7.63E+05 | 5.35E+05 | 3.81E+05 | 0.98             | 7.49E-01 | 9.32E-01 | 1.29    | 8.44E-01 | 1.26E-01  | 2.94E+05 | 3.78E+05 |
| 8.08E+06 | 1.03E+07 | 1.13E+07 | 2.33E+07 | 1.91E+07 | 1.75E+07 | 1.02             | 1.08E+00 | 9.48E-01 | 1.29    | 1.14E+00 | 2.50E-01  | 8.02E+06 | 1.03E+07 |
| 1.87E+05 | 2.76E+05 | 3.57E+05 | 2.89E+05 | 3.60E+05 | 2.29E+05 | 0.97             | 1.10E+00 | 9.29E-01 | 1.27    | 1.29E+00 | 3.27E-01  | 1.78E+05 | 2.26E+05 |
| 6.25E+05 | 5.76E+05 | 4.91E+05 | 1.11E+06 | 5.82E+05 | 7.63E+05 | 0.97             | 7.46E-01 | 8.64E-01 | 1.27    | 7.15E-01 | 1.05E-01  | 3.94E+05 | 4.99E+05 |
| 1.02E+05 | 1.70E+05 | 1.16E+05 | 3.53E+05 | 3.02E+05 | 2.34E+05 | 0.99             | 1.20E+00 | 9.70E-01 | 1.26    | 1.24E+00 | 3.40E-01  | 1.09E+05 | 1.38E+05 |
| 9.63E+04 | 9.60E+04 | 8.85E+04 | 8.56E+04 | 7.52E+04 | 1.14E+05 | 0.95             | 8.10E-01 | 8.37E-01 | 1.26    | 9.54E-01 | 2.24E-01  | 5.64E+04 | 7.10E+04 |
| 3.28E+05 | 3.47E+05 | 2.71E+05 | 7.02E+05 | 5.41E+05 | 4.96E+05 | 0.98             | 1.03E+00 | 9.51E-01 | 1.26    | 1.08E+00 | 2.87E-01  | 2.57E+05 | 3.23E+05 |
| 3.46E+05 | 2.35E+05 | 3.06E+05 | 5.46E+05 | 2.68E+05 | 5.27E+05 | 1.03             | 7.72E-01 | 8.86E-01 | 1.25    | 1.05E+00 | 2.79E-01  | 2.07E+05 | 2.59E+05 |
| 6.27E+06 | 6.97E+06 | 6.55E+06 | 1.17E+07 | 9.45E+06 | 9.01E+06 | 0.99             | 8.17E-01 | 9.46E-01 | 1.25    | 8.72E-01 | 1.97E-01  | 4.79E+06 | 5.99E+06 |
| 3.24E+04 | 6.25E+04 | 6.55E+04 | 1.10E+05 | 1.13E+05 | 8.47E+04 | 0.98             | 1.27E+00 | 9.47E-01 | 1.25    | 1.39E+00 | 4.13E-01  | 4.51E+04 | 5.64E+04 |
| 2.87E+06 | 2.64E+06 | 2.70E+06 | 3.84E+06 | 2.37E+06 | 4.19E+06 | 1.01             | 5.77E-01 | 9.63E-01 | 1.25    | 7.55E-01 | 1.46E-01  | 1.76E+06 | 2.19E+06 |
| 3.78E+05 | 2.69E+05 | 3.23E+05 | 4.03E+05 | 2.72E+05 | 3.31E+05 | 0.92             | 8.01E-01 | 7.23E-01 | 1.25    | 9.26E-01 | 2.36E-01  | 1.88E+05 | 2.35E+05 |
| 1.16E+05 | 2.15E+05 | 1.08E+05 | 3.81E+05 | 2.64E+05 | 2.87E+05 | 1.04             | 1.16E+00 | 8.78E-01 | 1.25    | 1.24E+00 | 3.67E-01  | 1.26E+05 | 1.57E+05 |
| 2.09E+05 | 2.62E+05 | 2.76E+05 | 4.54E+05 | 4.38E+05 | 3.35E+05 | 1.01             | 9.30E-01 | 9.79E-01 | 1.25    | 9.69E-01 | 2.54E-01  | 1.84E+05 | 2.29E+05 |
| 2.37E+05 | 2.98E+05 | 2.44E+05 | 5.34E+05 | 3.40E+05 | 1.95E+05 | 0.99             | 6.34E-01 | 9.31E-01 | 1.25    | 7.49E-01 | 1.65E-01  | 1.73E+05 | 2.16E+05 |
| 2.52E+05 | 3.37E+05 | 3.46E+05 | 5.96E+05 | 4.97E+05 | 4.27E+05 | 0.99             | 7.15E-01 | 9.56E-01 | 1.24    | 7.07E-01 | 1.28E-01  | 2.35E+05 | 2.93E+05 |
| 9.93E+05 | 1.16E+06 | 1.09E+06 | 1.76E+06 | 1.30E+06 | 1.32E+06 | 0.94             | 6.59E-01 | 7.46E-01 | 1.24    | 6.10E-01 | 8.49E-02  | 7.70E+05 | 9.58E+05 |

14 Supplemental Table S2

| Accession # | Protein                                                              | # of Pep | PEPTIDE                         | Modification                                                    | XCorr | Charge | m/z [Da] |
|-------------|----------------------------------------------------------------------|----------|---------------------------------|-----------------------------------------------------------------|-------|--------|----------|
| 568908552   | Carboxypeptidase PM20D1                                              | 2        | GAIQIPTVSFSHEESNTTALAEFGYIR     | Deamidated(16)                                                  | 5.04  | 3      | 1023.5   |
| 19527130    | EMILIN-1                                                             | 7        | LGALNNSLLLLLEDR                 | Deamidated(5)                                                   | 2.79  | 2      | 770.9    |
| 7242138     | Sodium/potassium-transporting ATPase subunit                         | 3        | DEDAENLGHFVMFPANGSIDLMYFPYYGK   | Deamidated(16)Oxidation(12)Oxidation(22)                        | 4.36  | 3      | 1125.2   |
| 568995055   | Transferrin receptor protein 1                                       | 2        | NITAFNETLFR                     | Deamidated(6)                                                   | 2.84  | 2      | 663.8    |
| 254910995   | alpha-N-                                                             | 1        | LLLTAAPNLTTSPAFR                | Deamidated(8)                                                   | 3.14  | 2      | 844.0    |
| 150378501   | Carboxypeptidase D                                                   | 4        | GILNATLSVAEINHPVTTYK            | Deamidated(4)                                                   | 5.35  | 3      | 714.7    |
| 71040107    | Cell adhesion molecule 1                                             | 1        | VSLTNVSISDEGR                   | Deamidated(5)                                                   | 3.97  | 2      | 689.3    |
| 111378397   | phosphatidylinositol-glycan-specific phospholipase D                 | 3        | LSSSPNVTISCK                    | Carbamidomethyl(11)Deamidated(6)                                | 3.49  | 2      | 647.3    |
| 114326497   | Laminin subunit beta-1                                               | 6        | LTDTASQSNSTAGELGALQAEAESLDK     | Deamidated(9)                                                   | 8.56  | 3      | 903.4    |
| 568962784   | Laminin subunit beta-2                                               | 4        | DGLALNLTLR                      | Deamidated(6)                                                   | 3.1   | 2      | 543.8    |
| 6754354     | Inhibin beta C chain                                                 | 1        | FMFFVQFPHNATQTMNIR              | Deamidated(16)Oxidation(2)Oxidation(15)                         | 3.64  | 3      | 754.7    |
| 755556472   | Bis(5'-adenosyl)-triphosphatase enpp4                                | 2        | SNYSVIDLTPVAAILPK               | Deamidated(2)                                                   | 4.44  | 2      | 901.5    |
| 575771903   | Inter alpha-trypsin inhibitor, heavy chain 4                         | 5        | KAFITNFSMIDGVTYPGVVK            | Deamidated(6)Oxidation(9)                                       | 5.14  | 3      | 773.1    |
| 225903442   | Integrin alpha-5                                                     | 6        | NALNLTFHAQNLGEGGAYEELR          | Deamidated(1)Deamidated(4)                                      | 6.83  | 3      | 830.4    |
| 160358825   | Beta-2-glycoprotein 1                                                | 3        | NISFACNPGFFLNGTSSSK             | Carbamidomethyl(6)Deamidated(1)Deamidated(13)                   | 3.94  | 2      | 1025.5   |
| 84370361    | Nidogen-2                                                            | 1        | TNIEGQVPFIPANFTAHTPYK           | Deamidated(13)                                                  | 5.65  | 3      | 820.4    |
| 161086902   | Voltage-dependent calcium channel subunit alpha-2/delta-             | 6        | DDLDPERNESEPGSQR                | Deamidated(8)                                                   | 3.74  | 3      | 615.6    |
| 111378397   | phosphatidylinositol-glycan-specific phospholipase D                 | 3        | LTSFMLENGTSDCNLPENPLFISCDGR     | Carbamidomethyl(13)Carbamidomethyl(24)Deamidated(8)Oxidation(5) | 4.01  | 3      | 1035.5   |
| 755553838   | Type 2 lactosamine alpha-2,3-sialyltransferase                       | 1        | LFYPESVFSDSSHYDPNTTAVLVVFKPQDLR | Deamidated(17)                                                  | 4.88  | 4      | 893.9    |
| 31982712    | Carboxypeptidase B2                                                  | 3        | AYISMHSYSQQILFPYSYNR            | Deamidated(19)Oxidation(5)                                      | 5.55  | 3      | 829.1    |
| 755541228   | Synaptophysin-like protein                                           | 2        | NQTVTATFGYPFR                   | Deamidated(1)                                                   | 3.74  | 2      | 751.9    |
| 12963613    | Junctional adhesion molecule C                                       | 1        | FQNSSFHVNSETGTLVFNAVHK          | Deamidated(3)                                                   | 4.96  | 4      | 616.8    |
| 568930638   | Basement membrane-specific heparan sulfate proteoglycan core protein | 8        | ALVNFTR                         | Deamidated(4):Carbamyl                                          | 2.49  | 2      | 432.7    |
| 113195678   | Lysosomal-associated membrane protein 1                              | 7        | ENVSDPSLTITFGR                  | Deamidated(2)                                                   | 3.26  | 2      | 768.9    |
| 755542383   | Serine protease inhibitor A3N                                        | 1        | YTGNASAMFILPDQ GK               | Deamidated(4)Oxidation(8)                                       | 3.93  | 2      | 865.4    |
| 568986620   | Clusterin                                                            | 3        | RNSTGCLK                        | Carbamidomethyl(6)Deamidated(2)                                 | 2.68  | 2      | 468.7    |

14 Supplemental Table S2

| MH+ [Da] | RT [min] | PSM | WT-1     | WT-2     | WT-3     | WT-4     | WT-5     | WT-5-2   | WT-6     | WT-7     | WT-8     | Null-1   | Null-2   |
|----------|----------|-----|----------|----------|----------|----------|----------|----------|----------|----------|----------|----------|----------|
| 3068.5   | 58.1     | 8   | 5.98E+04 | 4.33E+04 | 1.81E+05 | 4.60E+04 | 1.88E+05 | 1.53E+05 | 6.86E+03 | 9.25E+04 | 5.92E+04 | 2.92E+04 | 1.71E+05 |
| 1540.9   | 55.2     | 193 | 1.35E+05 | 2.11E+05 | 2.78E+05 | 1.50E+05 | 4.53E+05 | 3.39E+05 | 6.07E+04 | 2.21E+05 | 1.02E+05 | 1.54E+05 | 3.09E+05 |
| 3373.5   | 63.9     | 13  | 5.74E+04 | 8.11E+04 | 1.49E+05 | 3.78E+04 | 1.53E+05 | 1.50E+05 | 8.61E+03 | 8.40E+04 | 5.45E+04 | 3.62E+04 | 1.13E+05 |
| 1326.7   | 50.2     | 5   | 1.96E+05 | 1.15E+05 | 3.58E+05 | 1.05E+05 | 5.23E+05 | 4.99E+05 | 1.19E+05 | 3.23E+05 | 1.49E+05 | 1.76E+05 | 3.07E+05 |
| 1686.9   | 52.2     | 18  | 2.04E+05 | 2.19E+05 | 2.84E+05 | 7.09E+04 | 3.20E+05 | 3.22E+05 | 9.43E+04 | 1.72E+05 | 1.09E+05 | 1.43E+05 | 1.66E+05 |
| 2142.1   | 50.1     | 12  | 1.26E+05 | 1.26E+05 | 1.94E+05 | 7.03E+04 | 1.88E+05 | 1.57E+05 | 5.13E+04 | 1.09E+05 | 6.71E+04 | 6.39E+04 | 1.73E+05 |
| 1377.7   | 38.0     | 16  | 9.23E+04 | 1.20E+05 | 1.33E+05 | 4.04E+04 | 1.79E+05 | 1.49E+05 | 8.25E+04 | 9.87E+04 | 5.33E+04 | 7.24E+04 | 8.79E+04 |
| 1293.6   | 28.3     | 14  | 2.04E+05 | 2.26E+05 | 3.37E+05 | 8.83E+04 | 4.82E+05 | 4.35E+05 | 2.91E+05 | 1.51E+05 | 2.31E+05 | 1.18E+05 | 3.10E+05 |
| 2708.3   | 52.4     | 88  | 1.61E+05 | 1.43E+05 | 2.93E+05 | 1.07E+05 | 3.51E+05 | 3.00E+05 | 1.02E+05 | 1.42E+05 | 1.04E+05 | 1.51E+05 | 2.17E+05 |
| 1086.6   | 52.9     | 70  | 1.32E+06 | 1.88E+06 | 3.34E+06 | 1.36E+06 | 3.99E+06 | 4.19E+06 | 7.36E+05 | 2.57E+06 | 7.98E+05 | 5.46E+05 | 3.42E+06 |
| 2262.0   | 48.7     | 1   | 2.24E+05 | 3.19E+05 | 3.13E+05 | 1.93E+05 | 3.16E+05 | 2.57E+05 | 1.44E+05 | 1.89E+05 | 1.38E+05 | 1.25E+05 | 2.78E+05 |
| 1802.0   | 66.2     | 20  | 1.65E+05 | 2.03E+05 | 4.24E+05 | 1.06E+05 | 3.58E+05 | 3.67E+05 | 7.54E+04 | 2.16E+05 | 1.49E+05 | 1.21E+05 | 3.53E+05 |
| 2317.2   | 58.4     | 75  | 1.79E+06 | 4.13E+06 | 7.11E+06 | 2.07E+06 | 7.43E+06 | 6.78E+06 | 1.31E+06 | 2.59E+06 | 4.26E+06 | 2.09E+06 | 2.88E+06 |
| 2489.2   | 46.6     | 29  | 3.20E+04 | 9.81E+04 | 1.07E+05 | 4.16E+03 | 7.07E+04 | 9.07E+04 | 1.95E+04 | 5.98E+04 | 3.18E+04 | 1.52E+04 | 9.33E+04 |
| 2049.9   | 58.2     | 15  | 1.31E+05 | 2.08E+05 | 3.00E+05 | 5.13E+04 | 4.53E+05 | 3.84E+05 | 9.56E+04 | 1.34E+05 | 9.69E+04 | 9.79E+04 | 2.60E+05 |
| 2459.3   | 53.7     | 38  | 1.78E+06 | 2.12E+06 | 4.44E+06 | 1.49E+06 | 5.54E+06 | 5.25E+06 | 9.02E+05 | 2.80E+06 | 1.49E+06 | 1.53E+06 | 3.59E+06 |
| 1844.8   | 22.8     | 16  | 4.41E+05 | 2.54E+05 | 5.12E+05 | 0.00E+00 | 9.48E+05 | 9.02E+05 | 3.12E+05 | 6.34E+05 | 2.45E+05 | 2.52E+05 | 7.11E+05 |
| 3104.4   | 58.2     | 9   | 6.06E+04 | 8.06E+04 | 1.51E+05 | 2.21E+04 | 1.86E+05 | 1.60E+05 | 4.40E+04 | 4.66E+04 | 8.67E+04 | 2.45E+04 | 1.21E+05 |
| 3572.8   | 59.3     | 4   | 5.79E+04 | 9.95E+04 | 1.60E+05 | 5.62E+04 | 1.42E+05 | 1.48E+05 | 2.79E+03 | 1.38E+05 | 6.22E+04 | 2.17E+04 | 1.18E+05 |
| 2485.2   | 44.1     | 15  | 2.00E+05 | 3.43E+05 | 3.38E+05 | 5.46E+05 | 2.25E+05 | 2.24E+05 | 6.87E+04 | 2.25E+05 | 2.14E+05 | 2.11E+05 | 2.40E+05 |
| 1502.7   | 49.8     | 17  | 6.97E+05 | 8.19E+05 | 1.12E+06 | 4.06E+05 | 1.34E+06 | 1.25E+06 | 5.47E+05 | 9.87E+05 | 6.45E+05 | 4.37E+05 | 1.21E+06 |
| 2464.2   | 40.7     | 13  | 2.18E+05 | 1.86E+05 | 3.81E+05 | 1.45E+05 | 4.34E+05 | 3.71E+05 | 1.24E+05 | 2.70E+05 | 1.49E+05 | 1.47E+05 | 3.13E+05 |
| 864.5    | 51.3     | 8   | 4.48E+05 | 3.69E+05 | 2.11E+05 | 3.26E+05 | 9.33E+05 | 7.92E+05 | 2.24E+05 | 4.15E+05 | 3.03E+05 | 4.38E+05 | 3.93E+05 |
| 1536.7   | 46.5     | 8   | 5.38E+05 | 7.44E+05 | 6.80E+05 | 3.17E+05 | 8.52E+05 | 9.03E+05 | 4.30E+05 | 5.75E+05 | 2.79E+05 | 2.04E+05 | 7.29E+05 |
| 1729.8   | 41.5     | 39  | 7.98E+05 | 2.05E+06 | 1.82E+06 | 1.10E+06 | 2.49E+06 | 2.17E+06 | 1.42E+06 | 9.70E+05 | 3.50E+06 | 1.32E+06 | 1.94E+06 |
| 936.5    | 15.9     | 1   | 1.22E+06 | 1.82E+06 | 2.68E+06 | 0.00E+00 | 4.92E+06 | 9.99E+01 | 1.76E+06 | 5.22E+05 | 1.98E+05 | 5.78E+05 | 1.54E+06 |

14 Supplemental Table S2

| Null-3   | Null-4   | Null-5   | Null-6   | Null-7   | Null-8   | Ratio<br>Null/WT | SD       | p value  | N Ratio | N SD     | N p value | Avg_WT   | Avg_Null |
|----------|----------|----------|----------|----------|----------|------------------|----------|----------|---------|----------|-----------|----------|----------|
| 5.72E+04 | 6.15E+04 | 7.45E+04 | 1.17E+05 | 1.27E+05 | 7.66E+04 | 0.97             | 1.19E+00 | 9.16E-01 | 1.24    | 1.30E+00 | 4.00E-01  | 5.21E+04 | 6.48E+04 |
| 1.89E+05 | 1.81E+05 | 1.63E+05 | 1.95E+05 | 1.86E+05 | 2.33E+05 | 0.93             | 7.60E-01 | 7.40E-01 | 1.24    | 8.21E-01 | 1.91E-01  | 1.22E+05 | 1.51E+05 |
| 6.47E+04 | 7.12E+04 | 7.62E+04 | 1.28E+05 | 1.03E+05 | 7.34E+04 | 0.97             | 9.41E-01 | 8.88E-01 | 1.24    | 9.82E-01 | 2.71E-01  | 4.93E+04 | 6.12E+04 |
| 1.77E+05 | 1.99E+05 | 2.44E+05 | 3.49E+05 | 3.35E+05 | 2.30E+05 | 0.95             | 8.60E-01 | 8.36E-01 | 1.24    | 8.74E-01 | 2.37E-01  | 1.50E+05 | 1.87E+05 |
| 1.67E+05 | 1.61E+05 | 1.51E+05 | 3.20E+05 | 1.84E+05 | 2.26E+05 | 0.95             | 7.51E-01 | 8.03E-01 | 1.24    | 7.49E-01 | 1.56E-01  | 1.14E+05 | 1.41E+05 |
| 8.39E+04 | 9.99E+04 | 9.32E+04 | 1.45E+05 | 1.68E+05 | 1.08E+05 | 0.97             | 7.49E-01 | 8.56E-01 | 1.24    | 7.27E-01 | 1.47E-01  | 6.93E+04 | 8.58E+04 |
| 5.58E+04 | 1.21E+05 | 7.69E+04 | 1.27E+05 | 1.45E+05 | 1.25E+05 | 0.96             | 7.11E-01 | 8.28E-01 | 1.24    | 6.69E-01 | 1.17E-01  | 6.01E+04 | 7.45E+04 |
| 1.90E+05 | 1.54E+05 | 2.95E+05 | 3.71E+05 | 2.77E+05 | 4.03E+05 | 0.97             | 8.37E-01 | 9.04E-01 | 1.24    | 8.44E-01 | 2.11E-01  | 1.56E+05 | 1.93E+05 |
| 1.45E+05 | 1.41E+05 | 1.52E+05 | 2.16E+05 | 1.64E+05 | 2.16E+05 | 0.93             | 6.60E-01 | 6.98E-01 | 1.24    | 6.21E-01 | 1.09E-01  | 1.06E+05 | 1.31E+05 |
| 1.51E+06 | 1.52E+06 | 1.99E+06 | 3.21E+06 | 2.52E+06 | 2.39E+06 | 0.95             | 9.92E-01 | 8.55E-01 | 1.24    | 1.09E+00 | 3.30E-01  | 1.25E+06 | 1.55E+06 |
| 1.96E+05 | 2.03E+05 | 1.58E+05 | 3.38E+05 | 2.50E+05 | 2.51E+05 | 0.97             | 5.96E-01 | 8.27E-01 | 1.24    | 5.85E-01 | 8.30E-02  | 1.34E+05 | 1.66E+05 |
| 1.84E+05 | 1.73E+05 | 1.85E+05 | 2.74E+05 | 2.53E+05 | 2.14E+05 | 0.96             | 8.35E-01 | 8.50E-01 | 1.24    | 8.79E-01 | 2.31E-01  | 1.31E+05 | 1.62E+05 |
| 5.01E+06 | 2.38E+06 | 3.62E+06 | 7.73E+06 | 4.47E+06 | 4.18E+06 | 0.97             | 9.98E-01 | 9.07E-01 | 1.23    | 1.16E+00 | 3.67E-01  | 2.43E+06 | 3.00E+06 |
| 4.79E+04 | 4.26E+04 | 3.79E+04 | 8.45E+04 | 6.15E+04 | 6.91E+04 | 0.99             | 1.09E+00 | 9.72E-01 | 1.23    | 1.22E+00 | 3.95E-01  | 3.33E+04 | 4.10E+04 |
| 1.95E+05 | 1.50E+05 | 1.30E+05 | 2.69E+05 | 2.02E+05 | 2.00E+05 | 0.91             | 9.18E-01 | 7.37E-01 | 1.22    | 9.67E-01 | 3.05E-01  | 1.14E+05 | 1.39E+05 |
| 2.07E+06 | 2.28E+06 | 2.16E+06 | 3.99E+06 | 3.05E+06 | 2.62E+06 | 0.93             | 8.57E-01 | 7.57E-01 | 1.22    | 8.59E-01 | 2.66E-01  | 1.61E+06 | 1.96E+06 |
| 2.26E+05 | 3.39E+05 | 5.29E+05 | 6.06E+05 | 4.90E+05 | 4.03E+05 | 0.94             | 9.88E-01 | 8.24E-01 | 1.21    | 1.10E+00 | 3.84E-01  | 2.70E+05 | 3.28E+05 |
| 6.60E+04 | 5.11E+04 | 9.48E+04 | 9.61E+04 | 9.81E+04 | 1.65E+05 | 0.96             | 1.07E+00 | 8.89E-01 | 1.21    | 1.13E+00 | 4.05E-01  | 5.34E+04 | 6.47E+04 |
| 5.07E+04 | 9.22E+04 | 8.93E+04 | 1.17E+05 | 1.57E+05 | 1.18E+05 | 0.99             | 1.00E+00 | 9.67E-01 | 1.21    | 1.09E+00 | 3.91E-01  | 5.66E+04 | 6.86E+04 |
| 2.87E+05 | 2.13E+05 | 1.71E+05 | 2.71E+05 | 2.96E+05 | 3.09E+05 | 0.94             | 6.56E-01 | 7.58E-01 | 1.20    | 7.73E-01 | 2.62E-01  | 1.56E+05 | 1.88E+05 |
| 5.53E+05 | 7.50E+05 | 7.99E+05 | 1.13E+06 | 1.12E+06 | 6.43E+05 | 0.96             | 6.92E-01 | 8.02E-01 | 1.20    | 7.41E-01 | 2.34E-01  | 5.08E+05 | 6.11E+05 |
| 1.80E+05 | 1.86E+05 | 2.12E+05 | 2.87E+05 | 2.82E+05 | 2.78E+05 | 0.93             | 6.71E-01 | 6.98E-01 | 1.20    | 6.24E-01 | 1.73E-01  | 1.45E+05 | 1.74E+05 |
| 3.91E+05 | 3.20E+05 | 3.34E+05 | 6.02E+05 | 4.32E+05 | 3.14E+05 | 0.90             | 7.16E-01 | 6.37E-01 | 1.20    | 8.13E-01 | 2.82E-01  | 2.55E+05 | 3.06E+05 |
| 3.55E+05 | 5.32E+05 | 4.80E+05 | 7.53E+05 | 5.63E+05 | 8.43E+05 | 0.94             | 7.19E-01 | 7.55E-01 | 1.20    | 7.18E-01 | 2.35E-01  | 3.38E+05 | 4.05E+05 |
| 2.61E+06 | 9.36E+05 | 1.38E+06 | 2.02E+06 | 1.25E+06 | 3.29E+06 | 1.02             | 9.18E-01 | 9.42E-01 | 1.20    | 1.45E+00 | 5.42E-01  | 1.15E+06 | 1.38E+06 |
| 1.42E+06 | 1.57E+06 | 2.97E+05 | 9.25E+05 | 1.21E+06 | 2.48E+06 | 0.86             | 1.40E+00 | 7.30E-01 | 1.20    | 1.72E+00 | 6.08E-01  | 7.69E+05 | 9.22E+05 |

14 Supplemental Table S2

| Accession # | Protein                                                | # of Pep | PEPTIDE                                  | Modification                                                    | XCorr | Charge | m/z [Da] |
|-------------|--------------------------------------------------------|----------|------------------------------------------|-----------------------------------------------------------------|-------|--------|----------|
| 755532856   | Laminin, alpha 2                                       | 17       | CNINGSFSEICHTR                           | Carbamidomethyl(1)Carbamidomethyl(11)Deamidated(2)Deamidated(4) | 3.9   | 3      | 566.2    |
| 568958751   | Hypoxia up-regulated protein 1                         | 7        | LGNTISSLFGGGTSSDAKENGTDV<br>QEEEESPAEGSK | Deamidated(20)                                                  | 5.89  | 3      | 1233.9   |
| 568953122   | Insulin receptor                                       | 4        | GLSPGNYSVR                               | Deamidated(6)                                                   | 2.63  | 2      | 525.8    |
| 22203747    | Collagen alpha-2(VI) chain                             | 6        | HAELSFVFLTDGVTGNDLSLEESVHS<br>MR         | Deamidated(16)Oxidation(26)                                     | 3.36  | 3      | 998.5    |
| 568920137   | Laminin subunit alpha-5                                | 15       | QLLANSSALEETILGHQGR                      | Deamidated(5)                                                   | 6.41  | 3      | 680.0    |
| 568922760   | Immunoglobulin superfamily member 10                   | 6        | YTLFHNGTLYFNK                            | Deamidated(6)                                                   | 4.74  | 3      | 540.3    |
| 109627652   | Complement factor H                                    | 2        | DNSCVDPPHPNATIVTR                        | Carbamidomethyl(4)Deamidated(12)                                | 4.09  | 3      | 665.0    |
| 755532856   | Laminin, alpha 2                                       | 17       | LSAITNDTAAK                              | Deamidated(6)                                                   | 3.02  | 2      | 553.3    |
| 148747546   | Serine protease inhibitor A3K                          | 4        | EMDIVFHEHQDNGTQDDSLTLASV<br>NTDFAFSLYK   | Deamidated(12)Oxidation(2)                                      | 6.59  | 4      | 976.9    |
| 569003157   | Desmocollin-2                                          | 2        | NGIYNITVLALDADGR                         | Deamidated(1)Deamidated(5)                                      | 3.09  | 2      | 853.9    |
| 150378501   | Carboxypeptidase D                                     | 4        | GLVMNYPHITNLTTLGQSVEYR                   | Deamidated(11)Oxidation(4)                                      | 6.46  | 3      | 841.8    |
| 116014342   | Basigin                                                | 4        | TSDTGEEEEAITNSTEANGKYVVVST<br>PEK        | Deamidated(12)Deamidated(17)                                    | 5.37  | 3      | 986.8    |
| 568956041   | Cadherin-13                                            | 6        | QENISVGSVLLTVNATDPDSLQHQ<br>TIR          | Deamidated(3)Deamidated(14)                                     | 5.18  | 3      | 979.8    |
| 568991301   | Plexin B2                                              | 10       | TEAGVFEYVADPTFENFTGGVK                   | Deamidated(16)                                                  | 5.59  | 3      | 793.7    |
| 569003077   | Cadherin-2                                             | 6        | SNISILR                                  | Deamidated(2)                                                   | 2.59  | 2      | 402.2    |
| 171846253   | Transmembrane glycoprotein NMB                         | 6        | NDRNLSDEIFLR                             | Deamidated(1)Deamidated(4)                                      | 3.77  | 3      | 498.3    |
| 568962784   | Laminin subunit beta-2                                 | 4        | RANASTFAVPSVNSADTR                       | Deamidated(3)                                                   | 5.42  | 3      | 683.7    |
| 148747408   | Laminin subunit alpha-4                                | 7        | LSNLSNLSHDLVQEATDHAYNLQ<br>QEADLSR       | Deamidated(3)                                                   | 7.74  | 4      | 878.7    |
| 6679653     | Glutamyl aminopeptidase                                | 1        | IALNLTMYLK                               | Deamidated(4)Oxidation(7)                                       | 2.89  | 2      | 598.8    |
| 161702988   | Apolipoprotein B-100                                   | 2        | LTYESGFLNYSK                             | Deamidated(9)                                                   | 3.21  | 2      | 711.8    |
| 310616735   | H-2 class I histocompatibility antigen, Q7 alpha chain | 1        | EQNYTCHVNHEGLPEPLTLR                     | Carbamidomethyl(6)Deamidated(3)                                 | 3.35  | 4      | 602.8    |
| 6680856     | Corticosteroid-binding globulin                        | 2        | VPMMVQSGNISYFR                           | Deamidated(9)Oxidation(3)Oxidation(4)                           | 3.6   | 2      | 831.4    |
| 23346525    | CD109 antigen                                          | 3        | QLNGSVIAK                                | Deamidated(3)                                                   | 2.61  | 2      | 465.8    |
| 6755987     | Vitronectin                                            | 3        | FEDGVLDPGYPRNISEGFSGIPDNV<br>DAAFALPAHR  | Deamidated(13)                                                  | 5.43  | 4      | 937.0    |
| 755532856   | Laminin, alpha 2                                       | 17       | QANISIVDIDSNQEENVATSSSGN<br>NFGLDLK      | Deamidated(3)                                                   | 8.11  | 3      | 1094.2   |
| 6681143     | Decorin                                                | 3        | ISDTNITAIPQGLPTSLTEVHLDG<br>NKITK        | Deamidated(5)Deamidated(25)                                     | 4.63  | 4      | 770.4    |
| 569003157   | Desmocollin-2                                          | 2        | EAETVRNGIYNITVLALDADGR                   | Deamidated(7)Deamidated(11)                                     | 5.25  | 3      | 798.1    |



| MH+ [Da] | RT [min] | PSM | WT-1     | WT-2     | WT-3     | WT-4     | WT-5     | WT-5-2   | WT-6     | WT-7     | WT-8     | Null-1   | Null-2   |
|----------|----------|-----|----------|----------|----------|----------|----------|----------|----------|----------|----------|----------|----------|
| 1696.7   | 33.9     | 6   | 3.84E+04 | 3.62E+04 | 1.06E+05 | 1.76E+04 | 1.28E+05 | 1.22E+05 | 3.47E+04 | 3.22E+04 | 3.05E+04 | 3.32E+04 | 8.86E+04 |
| 3699.7   | 43.4     | 3   | 1.22E+05 | 1.15E+05 | 9.66E+04 | 5.96E+04 | 1.48E+05 | 1.00E+05 | 8.70E+04 | 9.64E+04 | 5.27E+04 | 5.11E+04 | 1.40E+05 |
| 1050.5   | 28.4     | 7   | 2.01E+05 | 1.17E+05 | 2.62E+05 | 9.40E+04 | 3.74E+05 | 3.60E+05 | 1.56E+05 | 1.89E+05 | 2.00E+05 | 1.36E+05 | 2.40E+05 |
| 2993.4   | 49.7     | 256 | 6.99E+06 | 7.24E+06 | 1.66E+07 | 5.66E+06 | 1.96E+07 | 2.04E+07 | 1.58E+06 | 1.39E+07 | 3.80E+06 | 2.10E+06 | 1.41E+07 |
| 2038.1   | 48.9     | 61  | 1.15E+06 | 1.17E+06 | 2.60E+06 | 1.27E+06 | 3.18E+06 | 2.91E+06 | 6.11E+05 | 1.64E+06 | 9.01E+05 | 1.07E+06 | 2.23E+06 |
| 1618.8   | 42.6     | 4   | 8.86E+04 | 1.06E+05 | 1.62E+05 | 8.56E+04 | 2.70E+05 | 2.26E+05 | 4.88E+04 | 1.19E+05 | 5.85E+04 | 8.25E+04 | 1.59E+05 |
| 1992.9   | 36.3     | 12  | 3.76E+05 | 5.90E+05 | 8.65E+05 | 2.25E+05 | 1.29E+06 | 1.23E+06 | 4.86E+05 | 2.45E+05 | 5.75E+05 | 3.88E+05 | 6.91E+05 |
| 1105.6   | 25.4     | 68  | 4.47E+06 | 4.48E+06 | 7.05E+06 | 1.83E+03 | 1.09E+07 | 8.62E+06 | 6.12E+06 | 4.44E+06 | 3.16E+06 | 2.65E+06 | 6.45E+06 |
| 3904.8   | 56.6     | 4   | 1.17E+05 | 3.31E+05 | 2.78E+05 | 1.78E+05 | 1.97E+05 | 1.86E+05 | 5.96E+03 | 7.45E+04 | 1.04E+05 | 5.11E+04 | 1.32E+05 |
| 1706.9   | 66.0     | 81  | 1.69E+05 | 1.72E+05 | 5.49E+05 | 1.19E+05 | 6.73E+05 | 6.09E+05 | 3.60E+04 | 3.03E+05 | 1.87E+05 | 1.57E+05 | 4.29E+05 |
| 2523.3   | 49.6     | 14  | 1.94E+05 | 3.10E+05 | 2.34E+05 | 9.14E+04 | 2.11E+05 | 3.75E+05 | 8.41E+04 | 2.06E+05 | 1.25E+05 | 9.96E+04 | 2.35E+05 |
| 2958.4   | 36.1     | 13  | 4.59E+05 | 1.90E+05 | 6.13E+05 | 1.87E+05 | 1.11E+06 | 1.14E+06 | 1.83E+05 | 3.70E+05 | 3.24E+05 | 3.99E+05 | 3.49E+05 |
| 2937.5   | 54.0     | 25  | 4.97E+05 | 3.42E+05 | 9.61E+05 | 2.85E+05 | 1.35E+06 | 1.47E+06 | 1.78E+05 | 9.58E+05 | 4.35E+05 | 3.76E+05 | 1.20E+06 |
| 2379.1   | 60.5     | 37  | 4.04E+05 | 7.34E+05 | 7.90E+05 | 2.09E+05 | 6.79E+05 | 6.74E+05 | 1.15E+05 | 4.68E+05 | 2.10E+05 | 2.00E+05 | 5.39E+05 |
| 803.5    | 33.8     | 16  | 9.97E+05 | 5.37E+05 | 1.77E+06 | 5.16E+05 | 2.60E+06 | 2.88E+06 | 8.78E+05 | 1.25E+06 | 8.39E+05 | 1.03E+06 | 1.79E+06 |
| 1492.7   | 37.2     | 117 | 1.02E+06 | 1.03E+06 | 1.38E+06 | 2.70E+05 | 1.09E+06 | 1.04E+06 | 8.14E+05 | 7.45E+05 | 2.43E+05 | 3.87E+05 | 6.62E+05 |
| 2049.0   | 34.0     | 74  | 3.15E+06 | 2.64E+06 | 4.16E+06 | 1.94E+06 | 6.23E+06 | 6.22E+06 | 2.31E+06 | 2.68E+06 | 1.88E+06 | 2.69E+06 | 3.27E+06 |
| 3511.7   | 58.2     | 78  | 1.82E+06 | 2.25E+06 | 3.76E+06 | 1.66E+06 | 5.64E+06 | 4.67E+06 | 1.45E+05 | 2.32E+06 | 1.49E+06 | 8.71E+05 | 2.23E+06 |
| 1196.7   | 54.0     | 21  | 3.16E+05 | 3.13E+05 | 6.07E+05 | 2.47E+05 | 5.46E+05 | 6.15E+05 | 1.09E+05 | 4.32E+05 | 1.87E+05 | 1.10E+05 | 6.35E+05 |
| 1422.7   | 42.4     | 13  | 8.57E+04 | 1.73E+05 | 2.04E+05 | 1.05E+05 | 1.98E+05 | 1.73E+05 | 1.23E+05 | 1.16E+05 | 1.94E+05 | 7.26E+04 | 1.43E+05 |
| 2408.1   | 35.2     | 1   | 1.25E+05 | 6.99E+04 | 9.92E+04 | 5.50E+04 | 1.59E+05 | 1.46E+05 | 6.20E+04 | 7.62E+04 | 7.01E+04 | 5.46E+04 | 1.40E+05 |
| 1661.8   | 36.5     | 1   | 1.27E+05 | 7.76E+04 | 1.83E+05 | 1.41E+05 | 1.98E+05 | 3.23E+05 | 1.15E+05 | 1.38E+05 | 9.39E+04 | 8.49E+04 | 1.43E+05 |
| 930.5    | 26.8     | 10  | 4.34E+05 | 3.26E+05 | 3.44E+05 | 3.94E+04 | 4.37E+05 | 3.63E+05 | 4.65E+05 | 4.00E+05 | 2.94E+05 | 2.25E+05 | 3.81E+05 |
| 3744.8   | 57.4     | 5   | 1.24E+05 | 6.91E+04 | 1.14E+05 | 1.57E+05 | 6.24E+05 | 5.03E+05 | 1.48E+04 | 1.18E+05 | 1.53E+05 | 8.89E+04 | 5.73E+04 |
| 3280.5   | 54.9     | 129 | 1.08E+06 | 1.19E+06 | 2.04E+06 | 8.28E+05 | 2.62E+06 | 2.38E+06 | 2.59E+05 | 1.29E+06 | 7.83E+05 | 5.37E+05 | 2.07E+06 |
| 3078.6   | 51.4     | 1   | 1.81E+05 | 5.67E+05 | 3.68E+05 | 1.17E+05 | 5.22E+05 | 3.63E+05 | 1.46E+05 | 2.59E+05 | 9.75E+04 | 1.11E+05 | 2.73E+05 |
| 2392.2   | 57.4     | 17  | 1.85E+05 | 1.40E+05 | 3.18E+05 | 1.33E+05 | 5.46E+05 | 6.62E+05 | 7.23E+04 | 2.41E+05 | 1.67E+05 | 1.40E+05 | 3.69E+05 |

14 Supplemental Table S2

| Null-3   | Null-4   | Null-5   | Null-6   | Null-7   | Null-8   | Ratio<br>Null/WT | SD       | p value  | N Ratio | N SD     | N p value | Avg_WT   | Avg_Null |
|----------|----------|----------|----------|----------|----------|------------------|----------|----------|---------|----------|-----------|----------|----------|
| 4.08E+04 | 5.98E+04 | 4.24E+04 | 5.81E+04 | 4.24E+04 | 5.93E+04 | 0.88             | 9.29E-01 | 6.49E-01 | 1.20    | 1.04E+00 | 4.04E-01  | 3.31E+04 | 3.96E+04 |
| 4.58E+04 | 4.53E+04 | 8.33E+04 | 1.51E+05 | 9.81E+04 | 1.31E+05 | 0.96             | 7.39E-01 | 8.16E-01 | 1.20    | 7.52E-01 | 3.01E-01  | 5.64E+04 | 6.74E+04 |
| 1.37E+05 | 1.58E+05 | 2.34E+05 | 3.04E+05 | 2.50E+05 | 1.72E+05 | 0.94             | 7.10E-01 | 7.45E-01 | 1.20    | 7.61E-01 | 2.60E-01  | 1.26E+05 | 1.51E+05 |
| 4.49E+06 | 6.17E+06 | 8.26E+06 | 1.61E+07 | 1.45E+07 | 1.49E+07 | 0.95             | 1.14E+00 | 8.53E-01 | 1.19    | 1.24E+00 | 4.88E-01  | 5.97E+06 | 7.13E+06 |
| 1.19E+06 | 1.45E+06 | 1.35E+06 | 2.17E+06 | 1.50E+06 | 1.35E+06 | 0.90             | 7.43E-01 | 6.26E-01 | 1.19    | 7.68E-01 | 2.72E-01  | 9.63E+05 | 1.15E+06 |
| 9.12E+04 | 1.22E+05 | 8.07E+04 | 1.30E+05 | 1.29E+05 | 1.30E+05 | 0.89             | 7.38E-01 | 6.21E-01 | 1.19    | 7.24E-01 | 2.58E-01  | 7.20E+04 | 8.59E+04 |
| 4.99E+05 | 4.86E+05 | 4.89E+05 | 6.73E+05 | 4.94E+05 | 1.08E+06 | 0.92             | 8.89E-01 | 7.31E-01 | 1.19    | 9.13E-01 | 3.56E-01  | 3.71E+05 | 4.43E+05 |
| 3.89E+06 | 5.02E+06 | 4.63E+06 | 6.96E+06 | 4.93E+06 | 5.31E+06 | 0.91             | 7.76E-01 | 6.78E-01 | 1.19    | 7.67E-01 | 2.78E-01  | 3.10E+06 | 3.69E+06 |
| 1.60E+05 | 1.69E+05 | 8.39E+04 | 1.99E+05 | 1.69E+05 | 2.64E+05 | 0.94             | 9.84E-01 | 8.09E-01 | 1.19    | 1.15E+00 | 4.61E-01  | 9.41E+04 | 1.12E+05 |
| 2.29E+05 | 1.88E+05 | 2.66E+05 | 3.99E+05 | 3.60E+05 | 2.35E+05 | 0.90             | 1.00E+00 | 7.34E-01 | 1.19    | 1.07E+00 | 4.43E-01  | 1.76E+05 | 2.09E+05 |
| 1.70E+05 | 1.36E+05 | 2.19E+05 | 2.83E+05 | 2.57E+05 | 1.27E+05 | 0.94             | 7.75E-01 | 7.57E-01 | 1.19    | 8.77E-01 | 3.46E-01  | 1.19E+05 | 1.42E+05 |
| 4.18E+05 | 2.61E+05 | 4.62E+05 | 7.13E+05 | 7.07E+05 | 2.76E+05 | 0.88             | 9.99E-01 | 6.77E-01 | 1.19    | 1.09E+00 | 4.53E-01  | 2.82E+05 | 3.35E+05 |
| 5.78E+05 | 5.03E+05 | 6.22E+05 | 7.31E+05 | 6.89E+05 | 5.42E+05 | 0.91             | 9.49E-01 | 7.29E-01 | 1.19    | 1.09E+00 | 4.55E-01  | 4.12E+05 | 4.89E+05 |
| 3.03E+05 | 4.26E+05 | 3.70E+05 | 6.17E+05 | 5.75E+05 | 5.11E+05 | 0.93             | 8.03E-01 | 7.42E-01 | 1.18    | 8.38E-01 | 3.41E-01  | 2.73E+05 | 3.23E+05 |
| 8.96E+05 | 9.98E+05 | 1.36E+06 | 1.37E+06 | 1.36E+06 | 8.33E+05 | 0.88             | 8.00E-01 | 6.22E-01 | 1.18    | 8.97E-01 | 3.71E-01  | 7.66E+05 | 9.07E+05 |
| 5.96E+05 | 7.57E+05 | 5.89E+05 | 1.44E+06 | 9.65E+05 | 7.90E+05 | 0.91             | 7.83E-01 | 6.64E-01 | 1.18    | 8.30E-01 | 3.34E-01  | 4.78E+05 | 5.66E+05 |
| 2.68E+06 | 2.76E+06 | 2.56E+06 | 4.87E+06 | 3.20E+06 | 2.48E+06 | 0.88             | 6.61E-01 | 5.35E-01 | 1.18    | 6.56E-01 | 2.27E-01  | 1.95E+06 | 2.30E+06 |
| 1.61E+06 | 2.36E+06 | 1.90E+06 | 4.34E+06 | 3.29E+06 | 2.74E+06 | 0.92             | 1.00E+00 | 7.51E-01 | 1.18    | 1.01E+00 | 4.25E-01  | 1.48E+06 | 1.75E+06 |
| 2.12E+05 | 2.64E+05 | 2.77E+05 | 4.56E+05 | 4.58E+05 | 3.87E+05 | 0.93             | 9.07E-01 | 7.76E-01 | 1.18    | 9.80E-01 | 4.24E-01  | 2.14E+05 | 2.53E+05 |
| 1.68E+05 | 8.97E+04 | 1.70E+05 | 2.21E+05 | 1.35E+05 | 1.76E+05 | 0.96             | 6.01E-01 | 8.14E-01 | 1.18    | 9.13E-01 | 3.83E-01  | 9.27E+04 | 1.09E+05 |
| 5.31E+04 | 9.26E+04 | 8.16E+04 | 1.04E+05 | 6.83E+04 | 1.06E+05 | 0.91             | 6.75E-01 | 6.23E-01 | 1.18    | 7.03E-01 | 2.74E-01  | 5.51E+04 | 6.50E+04 |
| 5.61E+04 | 1.30E+05 | 1.38E+05 | 1.74E+05 | 1.73E+05 | 2.46E+05 | 0.92             | 8.11E-01 | 7.11E-01 | 1.18    | 7.78E-01 | 3.16E-01  | 8.80E+04 | 1.04E+05 |
| 2.96E+05 | 3.32E+05 | 3.31E+05 | 3.19E+05 | 2.48E+05 | 4.63E+05 | 0.94             | 5.66E-01 | 6.92E-01 | 1.18    | 7.03E-01 | 2.76E-01  | 2.07E+05 | 2.44E+05 |
| 1.34E+05 | 6.99E+04 | 1.25E+05 | 6.75E+05 | 2.90E+05 | 6.07E+04 | 0.90             | 1.91E+00 | 8.40E-01 | 1.18    | 2.16E+00 | 7.31E-01  | 1.14E+05 | 1.34E+05 |
| 1.07E+06 | 1.12E+06 | 8.97E+05 | 1.81E+06 | 1.29E+06 | 1.21E+06 | 0.90             | 8.70E-01 | 6.76E-01 | 1.18    | 9.19E-01 | 4.03E-01  | 7.84E+05 | 9.21E+05 |
| 1.84E+05 | 2.20E+05 | 2.27E+05 | 5.17E+05 | 3.32E+05 | 2.70E+05 | 0.92             | 9.61E-01 | 7.39E-01 | 1.17    | 1.07E+00 | 4.73E-01  | 1.65E+05 | 1.94E+05 |
| 2.21E+05 | 1.65E+05 | 2.61E+05 | 3.25E+05 | 2.74E+05 | 1.76E+05 | 0.88             | 9.44E-01 | 6.66E-01 | 1.17    | 1.04E+00 | 4.68E-01  | 1.53E+05 | 1.80E+05 |

14 Supplemental Table S2

| Accession # | Protein                                                   | # of Pep | PEPTIDE                         | Modification                                                     | XCorr | Charge | m/z [Da] |
|-------------|-----------------------------------------------------------|----------|---------------------------------|------------------------------------------------------------------|-------|--------|----------|
| 268370173   | Peroxidasin homolog                                       | 4        | VYCNLSAAYTFEDLK                 | Carbamidomethyl(3)Deamidated(4)                                  | 3.51  | 2      | 897.9    |
| 114326497   | Laminin subunit beta-1                                    | 6        | MEMPSTPQQLQNLTEDIR              | Deamidated(12)Oxidation(1)Oxidation(3)                           | 3.28  | 3      | 721.7    |
| 755537649   | Platelet endothelial cell adhesion molecule               | 8        | LDQGELLDLSCSVSGTPVANFTIQK       | Carbamidomethyl(11)Deamidated(20)                                | 6.76  | 3      | 898.5    |
| 31560090    | Putative phospholipase B-like 2                           | 1        | SDLNPANGSYPFQALHQR              | Deamidated(7)                                                    | 3.37  | 3      | 672.7    |
| 50355939    | Anthrax toxin receptor 2                                  | 1        | AVTSISHDGSVLCTFTANSTYTK         | Carbamidomethyl(13)Deamidated(18)                                | 6.42  | 3      | 821.1    |
| 161086902   | Voltage-dependent calcium channel subunit alpha-2/delta-  | 6        | DAVNNITAK                       | Deamidated(5)                                                    | 2.51  | 2      | 473.7    |
| 164565411   | Collagen alpha-1(V)                                       | 3        | NVTLLDCK                        | Carbamidomethyl(8)Deamidated(1)                                  | 2.49  | 2      | 538.8    |
| 110347469   | Alpha-2-macroglobulin                                     | 5        | INVSYTGERPSSNMVIVDVK            | Deamidated(2)Oxidation(14)                                       | 4.86  | 3      | 742.4    |
| 171846253   | Transmembrane glycoprotein NMB                            | 6        | VSINTVNLTAGPQVMEVTVFRR          | Deamidated(7)Oxidation(15)                                       | 3.69  | 3      | 816.8    |
| 31560378    | Tetraspanin-6                                             | 1        | EYNSTGDYR                       | Deamidated(3)                                                    | 2.7   | 2      | 553.2    |
| 364502993   | Voltage-dependent L-type calcium channel subunit alpha-1C | 1        | IALNDTTEINR                     | Deamidated(4)                                                    | 2.58  | 2      | 630.8    |
| 113195678   | Lysosomal-associated membrane protein 1                   | 7        | LNMTLPDALVPTFSISNHSK            | Deamidated(17)Oxidation(3)                                       | 5.74  | 3      | 772.7    |
| 7304875     | Alpha-2-HS-glycoprotein                                   | 2        | RPFGVVYEMVDTLETTCHALDPTPLANCSVR | Carbamidomethyl(18)Carbamidomethyl(29)Deamidated(28)Oxidation(9) | 7.05  | 4      | 924.4    |
| 61656186    | Lman2l protein                                            | 1        | VFPYISAMVNNGLSLYDHER            | Deamidated(11)Oxidation(8)                                       | 5.52  | 3      | 772.7    |
| 755537649   | Platelet endothelial cell adhesion molecule               | 8        | VLFYKDDAMVYNVTSR                | Deamidated(12)Oxidation(9)                                       | 4.37  | 3      | 646.6    |
| 755532856   | Laminin, alpha 2                                          | 17       | LEQMTMNINLTGPLPAPYK             | Deamidated(7)Deamidated(9)Oxidation(4)Oxidation(6)               | 4.21  | 2      | 1082.5   |
| 7242138     | Sodium/potassium-transporting ATPase subunit              | 3        | FHVNYTQPLVAVK                   | Deamidated(4)                                                    | 4.1   | 2      | 758.9    |
| 755532856   | Laminin, alpha 2                                          | 17       | NSGLLGALNDTMDK                  | Deamidated(1)Deamidated(9)Oxidation(12)                          | 3.08  | 2      | 732.9    |
| 6753484     | Collagen alpha-1(VI) chain                                | 5        | NITAQICIDK                      | Carbamidomethyl(7)Deamidated(1)                                  | 2.62  | 2      | 588.8    |
| 568950268   | Protocadherin-16                                          | 1        | ETTPALLLVEATDRPANASR            | Deamidated(18)                                                   | 3.34  | 3      | 747.1    |
| 156616286   | Collagen alpha-6(VI) chain                                | 11       | VISLSTGNNKTEVLQR                | Deamidated(10)                                                   | 3.65  | 2      | 924.0    |
| 236465805   | Plasma kallikrein                                         | 1        | LQTPLNYTEFQKPICLPSK             | Carbamidomethyl(15)Deamidated(6)                                 | 4.87  | 3      | 760.1    |
| 568939507   | CAS1 domain-containing protein 1                          | 1        | MNITSIAPLLEK                    | Deamidated(2)Oxidation(1)                                        | 2.85  | 2      | 673.9    |

14 Supplemental Table S2

| MH+ [Da] | RT [min] | PSM | WT-1     | WT-2     | WT-3     | WT-4     | WT-5     | WT-5-2   | WT-6     | WT-7     | WT-8     | Null-1   | Null-2   |
|----------|----------|-----|----------|----------|----------|----------|----------|----------|----------|----------|----------|----------|----------|
| 1794.8   | 48.8     | 3   | 7.16E+04 | 1.03E+05 | 2.22E+05 | 1.29E+05 | 3.01E+05 | 1.49E+05 | 6.04E+04 | 1.01E+05 | 1.35E+05 | 1.09E+05 | 1.65E+05 |
| 2163.0   | 44.9     | 68  | 3.03E+06 | 3.16E+06 | 5.62E+06 | 2.17E+06 | 7.68E+06 | 7.23E+06 | 2.37E+06 | 3.33E+06 | 2.61E+06 | 2.21E+06 | 4.24E+06 |
| 2693.3   | 60.8     | 30  | 2.34E+05 | 2.88E+05 | 4.47E+05 | 1.39E+05 | 6.31E+05 | 5.48E+05 | 6.07E+04 | 3.91E+05 | 1.92E+05 | 8.46E+04 | 5.22E+05 |
| 2016.0   | 40.1     | 12  | 1.12E+05 | 7.22E+04 | 1.04E+05 | 3.92E+04 | 1.68E+05 | 1.61E+05 | 5.19E+04 | 7.90E+04 | 4.26E+04 | 5.04E+04 | 8.07E+04 |
| 2461.2   | 41.1     | 11  | 1.03E+05 | 1.04E+05 | 1.87E+05 | 6.50E+04 | 2.09E+05 | 1.94E+05 | 9.14E+04 | 1.28E+05 | 7.78E+04 | 6.92E+04 | 1.78E+05 |
| 946.5    | 25.2     | 2   | 2.51E+05 | 1.34E+05 | 2.85E+05 | 4.45E+03 | 5.22E+05 | 5.03E+05 | 1.51E+05 | 2.55E+05 | 1.23E+05 | 1.31E+05 | 3.38E+05 |
| 1076.6   | 43.7     | 1   | 8.30E+04 | 7.26E+04 | 1.63E+05 | 2.75E+04 | 2.69E+05 | 2.56E+05 | 6.00E+04 | 1.02E+05 | 4.85E+04 | 6.43E+04 | 1.61E+05 |
| 2225.1   | 36.4     | 24  | 8.87E+05 | 1.06E+06 | 1.46E+06 | 1.02E+06 | 1.64E+06 | 1.50E+06 | 3.56E+05 | 9.39E+05 | 8.99E+05 | 5.29E+05 | 1.17E+06 |
| 2448.3   | 46.3     | 2   | 3.87E+05 | 3.88E+05 | 5.59E+05 | 1.71E+05 | 5.58E+05 | 5.45E+05 | 1.17E+05 | 3.28E+05 | 1.20E+05 | 1.59E+05 | 2.34E+05 |
| 1105.4   | 19.5     | 2   | 1.85E+05 | 4.56E+04 | 3.87E+04 | 1.20E+03 | 2.26E+05 | 2.28E+05 | 1.66E+05 | 1.09E+05 | 5.37E+04 | 2.45E+03 | 1.37E+05 |
| 1260.6   | 32.9     | 5   | 7.07E+04 | 3.06E+04 | 1.21E+05 | 2.66E+04 | 2.14E+05 | 2.03E+05 | 3.00E+04 | 8.94E+04 | 5.97E+04 | 5.90E+04 | 1.35E+05 |
| 2316.2   | 54.2     | 168 | 2.91E+05 | 3.38E+05 | 6.04E+05 | 1.59E+05 | 7.17E+05 | 6.58E+05 | 1.75E+05 | 3.56E+05 | 2.00E+05 | 1.78E+05 | 4.71E+05 |
| 3694.7   | 50.7     | 55  | 1.64E+06 | 3.49E+06 | 4.07E+06 | 7.04E+05 | 4.82E+06 | 5.50E+06 | 4.91E+05 | 1.05E+06 | 1.46E+06 | 6.41E+05 | 3.31E+06 |
| 2316.1   | 43.1     | 17  | 2.09E+05 | 1.70E+05 | 2.64E+05 | 1.07E+05 | 3.82E+05 | 3.35E+05 | 4.40E+04 | 1.81E+05 | 9.68E+04 | 1.21E+05 | 1.85E+05 |
| 1937.9   | 39.0     | 19  | 5.08E+05 | 3.85E+05 | 6.48E+05 | 2.69E+05 | 9.81E+05 | 9.15E+05 | 2.45E+05 | 3.86E+05 | 2.87E+05 | 3.76E+05 | 4.12E+05 |
| 2164.1   | 46.1     | 95  | 2.99E+06 | 4.15E+06 | 6.92E+06 | 2.33E+06 | 8.09E+06 | 7.21E+06 | 3.60E+06 | 3.61E+06 | 2.81E+06 | 3.02E+06 | 5.11E+06 |
| 1516.8   | 39.9     | 26  | 2.52E+05 | 2.24E+05 | 4.23E+05 | 2.29E+05 | 5.62E+05 | 6.60E+05 | 1.84E+05 | 3.86E+05 | 1.95E+05 | 1.95E+05 | 3.61E+05 |
| 1464.7   | 41.0     | 68  | 7.55E+05 | 1.30E+06 | 2.29E+06 | 6.73E+05 | 2.57E+06 | 2.20E+06 | 1.36E+06 | 1.20E+06 | 8.23E+05 | 7.45E+05 | 1.77E+06 |
| 1176.6   | 38.4     | 10  | 5.57E+04 | 9.65E+04 | 1.98E+05 | 4.20E+04 | 2.60E+05 | 2.91E+05 | 4.55E+04 | 1.69E+05 | 5.45E+04 | 3.53E+04 | 2.13E+05 |
| 2239.2   | 56.6     | 13  | 5.80E+04 | 5.21E+04 | 9.88E+04 | 3.25E+04 | 2.05E+05 | 1.55E+05 | 2.56E+04 | 1.01E+05 | 3.66E+04 | 2.77E+04 | 1.14E+05 |
| 1847.0   | 29.8     | 30  | 3.71E+05 | 2.57E+05 | 4.51E+05 | 1.89E+05 | 7.24E+05 | 6.29E+05 | 2.21E+05 | 4.03E+05 | 2.52E+05 | 3.09E+05 | 3.81E+05 |
| 2278.2   | 47.2     | 7   | 6.01E+04 | 1.15E+05 | 2.06E+05 | 6.25E+04 | 2.85E+05 | 2.49E+05 | 4.64E+04 | 1.09E+05 | 1.26E+05 | 4.86E+04 | 2.42E+05 |
| 1346.7   | 49.7     | 18  | 2.41E+05 | 2.87E+05 | 4.41E+05 | 1.64E+05 | 4.64E+05 | 4.67E+05 | 1.76E+05 | 3.17E+05 | 2.10E+05 | 2.17E+05 | 3.17E+05 |

14 Supplemental Table S2

| Null-3   | Null-4   | Null-5   | Null-6   | Null-7   | Null-8   | Ratio<br>Null/WT | SD       | p value  | N Ratio | N SD     | N p value | Avg_WT   | Avg_Null |
|----------|----------|----------|----------|----------|----------|------------------|----------|----------|---------|----------|-----------|----------|----------|
| 7.24E+04 | 1.15E+05 | 1.10E+05 | 1.54E+05 | 1.60E+05 | 1.49E+05 | 0.92             | 7.27E-01 | 6.79E-01 | 1.17    | 7.31E-01 | 3.23E-01  | 8.15E+04 | 9.57E+04 |
| 2.83E+06 | 3.46E+06 | 3.48E+06 | 5.61E+06 | 4.01E+06 | 3.81E+06 | 0.90             | 7.07E-01 | 6.01E-01 | 1.17    | 6.62E-01 | 2.62E-01  | 2.34E+06 | 2.74E+06 |
| 2.14E+05 | 2.55E+05 | 2.78E+05 | 3.61E+05 | 3.92E+05 | 2.92E+05 | 0.92             | 9.40E-01 | 7.47E-01 | 1.17    | 1.02E+00 | 4.66E-01  | 1.87E+05 | 2.19E+05 |
| 7.17E+04 | 9.59E+04 | 7.06E+04 | 1.11E+05 | 8.25E+04 | 8.52E+04 | 0.88             | 6.52E-01 | 5.27E-01 | 1.17    | 6.61E-01 | 2.75E-01  | 5.17E+04 | 6.05E+04 |
| 9.07E+04 | 9.57E+04 | 1.02E+05 | 1.40E+05 | 1.48E+05 | 1.08E+05 | 0.91             | 6.59E-01 | 5.89E-01 | 1.17    | 6.45E-01 | 2.57E-01  | 7.37E+04 | 8.62E+04 |
| 1.26E+05 | 1.76E+05 | 2.46E+05 | 2.75E+05 | 2.75E+05 | 1.93E+05 | 0.89             | 9.26E-01 | 6.73E-01 | 1.17    | 9.84E-01 | 4.57E-01  | 1.39E+05 | 1.62E+05 |
| 8.71E+04 | 1.09E+05 | 5.20E+04 | 8.83E+04 | 1.45E+05 | 1.30E+05 | 0.87             | 9.68E-01 | 6.44E-01 | 1.17    | 1.03E+00 | 4.78E-01  | 6.59E+04 | 7.70E+04 |
| 1.07E+06 | 8.76E+05 | 8.19E+05 | 1.35E+06 | 7.80E+05 | 1.32E+06 | 0.91             | 5.97E-01 | 5.77E-01 | 1.17    | 6.65E-01 | 2.77E-01  | 6.32E+05 | 7.37E+05 |
| 2.90E+05 | 2.63E+05 | 2.37E+05 | 7.33E+05 | 4.00E+05 | 1.97E+05 | 0.89             | 9.83E-01 | 6.72E-01 | 1.17    | 1.08E+00 | 5.16E-01  | 1.98E+05 | 2.31E+05 |
| 6.57E+04 | 1.20E+05 | 9.41E+04 | 1.34E+05 | 1.42E+05 | 1.58E+05 | 0.91             | 1.11E+00 | 7.68E-01 | 1.17    | 1.23E+00 | 5.55E-01  | 6.56E+04 | 7.65E+04 |
| 3.83E+04 | 5.70E+04 | 8.26E+04 | 1.09E+05 | 1.11E+05 | 7.50E+04 | 0.89             | 1.03E+00 | 7.03E-01 | 1.17    | 1.10E+00 | 5.14E-01  | 5.25E+04 | 6.12E+04 |
| 3.11E+05 | 2.97E+05 | 3.09E+05 | 4.98E+05 | 3.90E+05 | 3.01E+05 | 0.89             | 7.59E-01 | 5.91E-01 | 1.16    | 7.76E-01 | 3.59E-01  | 2.19E+05 | 2.55E+05 |
| 1.41E+06 | 1.91E+06 | 1.57E+06 | 2.36E+06 | 2.19E+06 | 5.28E+06 | 0.91             | 1.22E+00 | 7.67E-01 | 1.16    | 1.31E+00 | 5.84E-01  | 1.44E+06 | 1.67E+06 |
| 1.37E+05 | 1.51E+05 | 1.54E+05 | 2.64E+05 | 2.51E+05 | 1.39E+05 | 0.88             | 7.70E-01 | 5.90E-01 | 1.16    | 7.46E-01 | 3.51E-01  | 1.12E+05 | 1.30E+05 |
| 3.78E+05 | 3.20E+05 | 3.87E+05 | 7.40E+05 | 6.34E+05 | 3.60E+05 | 0.88             | 7.67E-01 | 5.65E-01 | 1.16    | 7.44E-01 | 3.42E-01  | 2.88E+05 | 3.35E+05 |
| 3.67E+06 | 4.12E+06 | 3.10E+06 | 5.67E+06 | 4.36E+06 | 3.56E+06 | 0.88             | 6.14E-01 | 4.96E-01 | 1.16    | 6.02E-01 | 2.49E-01  | 2.62E+06 | 3.05E+06 |
| 2.28E+05 | 2.31E+05 | 2.75E+05 | 4.65E+05 | 4.16E+05 | 3.21E+05 | 0.90             | 7.30E-01 | 6.17E-01 | 1.16    | 6.97E-01 | 3.23E-01  | 1.97E+05 | 2.29E+05 |
| 1.04E+06 | 1.33E+06 | 1.19E+06 | 1.73E+06 | 1.21E+06 | 1.30E+06 | 0.88             | 6.63E-01 | 5.26E-01 | 1.16    | 6.61E-01 | 2.94E-01  | 8.26E+05 | 9.60E+05 |
| 4.58E+04 | 8.98E+04 | 7.73E+04 | 1.64E+05 | 2.19E+05 | 1.44E+05 | 0.92             | 1.20E+00 | 7.92E-01 | 1.16    | 1.30E+00 | 5.94E-01  | 7.56E+04 | 8.75E+04 |
| 4.66E+04 | 5.97E+04 | 8.76E+04 | 8.00E+04 | 1.02E+05 | 8.17E+04 | 0.88             | 9.77E-01 | 6.72E-01 | 1.16    | 1.05E+00 | 5.16E-01  | 4.74E+04 | 5.49E+04 |
| 2.75E+05 | 2.83E+05 | 3.07E+05 | 5.28E+05 | 3.77E+05 | 2.82E+05 | 0.88             | 6.43E-01 | 5.20E-01 | 1.15    | 6.63E-01 | 3.19E-01  | 2.23E+05 | 2.57E+05 |
| 7.49E+04 | 1.32E+05 | 8.71E+04 | 1.36E+05 | 1.27E+05 | 1.74E+05 | 0.91             | 1.00E+00 | 7.39E-01 | 1.15    | 1.09E+00 | 5.40E-01  | 8.06E+04 | 9.30E+04 |
| 2.13E+05 | 2.86E+05 | 2.61E+05 | 3.27E+05 | 3.20E+05 | 2.48E+05 | 0.89             | 5.04E-01 | 4.61E-01 | 1.15    | 5.21E-01 | 2.40E-01  | 1.78E+05 | 2.05E+05 |

14 Supplemental Table S2

| Accession # | Protein                                                                                     | # of Pep | PEPTIDE                         | Modification                                   | XCorr | Charge | m/z [Da] |
|-------------|---------------------------------------------------------------------------------------------|----------|---------------------------------|------------------------------------------------|-------|--------|----------|
| 575771903   | Inter alpha-trypsin inhibitor, heavy chain 4                                                | 5        | GLMLLLNDTQHFSSNNVK              | Deamidated(7)Deamidated(14)Oxidation(3)        | 5.19  | 3      | 654.3    |
| 755532856   | Laminin, alpha 2                                                                            | 17       | NMTILETK                        | Deamidated(1)Oxidation(2)                      | 2.46  | 2      | 483.7    |
| 165377045   | integrin alpha 9                                                                            | 2        | VLNLTDNITYFK                    | Deamidated(3)                                  | 3.27  | 2      | 664.8    |
| 110347564   | Truncated ceruloplasmin                                                                     | 2        | ELHHLQEQNVSNVFLDKKEFFIGSK       | Deamidated(9)                                  | 5.47  | 3      | 996.8    |
| 116014342   | Basigin                                                                                     | 4        | TQLTCSLNSSGVDIVGHR              | Carbamidomethyl(5)Deamidated(8)                | 5.17  | 3      | 649.0    |
| 225007625   | Interleukin-6 receptor subunit beta                                                         | 3        | ETYLETNYTLK                     | Deamidated(7)                                  | 2.94  | 2      | 688.3    |
| 755537649   | Platelet endothelial cell adhesion molecule                                                 | 8        | ASSIMVNITELFPKPK                | Deamidated(7)Oxidation(5)                      | 4.47  | 3      | 598.0    |
| 568966579   | Collagen alpha-1(XVIII) chain                                                               | 1        | DGQQNISLLYTEPGASQTQTGASFR       | Deamidated(5)                                  | 5.73  | 3      | 890.8    |
| 755522060   | Tripeptidyl-peptidase 1                                                                     | 2        | DVGSGTTNNSQACAQFLEQYFHNSDLTEFMR | Carbamidomethyl(13)Deamidated(23)Oxidation(30) | 7.41  | 4      | 896.9    |
| 122937370   | Multimerin-2                                                                                | 4        | NFNDSLHLSLQAIR                  | Deamidated(3)                                  | 3.44  | 3      | 534.9    |
| 226693367   | Lysosomal alpha-glucosidase                                                                 | 2        | LENLSSTESGYTATLTR               | Deamidated(3)                                  | 4.9   | 2      | 922.5    |
| 6678680     | Beta-1,3-N-acetylglucosaminyltransferase lunatic fringe                                     | 1        | LTGNVVLTCSSAHSR                 | Carbamidomethyl(10)Deamidated(9)               | 4.14  | 3      | 572.9    |
| 568920137   | Laminin subunit alpha-5                                                                     | 15       | LNVTSPDLFR                      | Deamidated(2)                                  | 3.12  | 2      | 581.8    |
| 6753798     | Prothrombin                                                                                 | 2        | SRYPHKPEINSTTHPGADLK            | Deamidated(10)                                 | 5.36  | 4      | 563.0    |
| 568971832   | Integrin alpha-3                                                                            | 2        | SLDAYPVLNQAQAMENHTEVHFQK        | Deamidated(16)Oxidation(14)                    | 5.76  | 4      | 697.6    |
| 89242146    | Niemann Pick type C1                                                                        | 6        | NPNLTSFTAER                     | Deamidated(3)                                  | 4.37  | 2      | 682.3    |
| 21389311    | Intercellular adhesion molecule 1                                                           | 2        | TELDLRPQGLALFSNVSEAR            | Deamidated(15)                                 | 6.68  | 3      | 739.7    |
| 755532856   | Laminin, alpha 2                                                                            | 17       | HMQNLTEEQPIEVK                  | Deamidated(4)Oxidation(2)                      | 5.81  | 3      | 571.6    |
| 755556472   | Bis(5'-adenosyl)-triphosphatase enpp4                                                       | 2        | INVTEVYDK                       | Deamidated(2)                                  | 2.95  | 2      | 541.3    |
| 113195678   | Lysosomal-associated membrane protein 1                                                     | 7        | DATIQAYLSSGNFSK                 | Deamidated(12)                                 | 4.36  | 2      | 801.9    |
| 13386130    | Mono(ADP-ribosyl)transferase                                                                | 1        | SAGNMSTYNCQLLK                  | Carbamidomethyl(10)Deamidated(4)Oxidation(5)   | 3.89  | 2      | 802.4    |
| 148747408   | Laminin subunit alpha-4                                                                     | 7        | DAVRNLTEVVPQLLDQLR              | Deamidated(5)                                  | 4.26  | 3      | 694.1    |
| 6857783     | low affinity immunoglobulin gamma Fc region receptor II-Protein-tyrosine sulfotransferase 2 | 3        | ATVNDSGEYR                      | Deamidated(4)                                  | 2.6   | 2      | 556.7    |
| 755512334   | Protein-tyrosine sulfotransferase 2                                                         | 1        | LGYPYANPPNYGNPDPVIVNNTHR        | Deamidated(21)                                 | 5.04  | 3      | 938.1    |
| 31791059    | CD166 antigen                                                                               | 3        | LSENYTLSIANAK                   | Deamidated(6)                                  | 4.31  | 2      | 812.9    |
| 302370951   | N-acetylgalactosamine-6-sulfatase, isoform 2                                                | 1        | TGEANLTQLYTQEALDFIQTQHAR        | Deamidated(5)                                  | 5.58  | 3      | 917.1    |

| MH+ [Da] | RT [min] | PSM | WT-1     | WT-2     | WT-3     | WT-4     | WT-5     | WT-5-2   | WT-6     | WT-7     | WT-8     | Null-1   | Null-2   |
|----------|----------|-----|----------|----------|----------|----------|----------|----------|----------|----------|----------|----------|----------|
| 1961.0   | 44.1     | 351 | 1.09E+06 | 2.50E+06 | 4.23E+06 | 1.67E+06 | 3.50E+06 | 3.74E+06 | 1.05E+06 | 2.21E+06 | 2.78E+06 | 1.14E+06 | 2.82E+06 |
| 966.5    | 26.5     | 6   | 1.46E+06 | 1.28E+06 | 2.25E+06 | 6.60E+05 | 2.92E+06 | 2.33E+06 | 1.50E+06 | 1.10E+06 | 8.01E+05 | 8.49E+05 | 1.47E+06 |
| 1328.7   | 45.6     | 16  | 3.79E+05 | 3.47E+05 | 6.22E+05 | 1.96E+05 | 5.96E+05 | 5.94E+05 | 2.23E+05 | 3.66E+05 | 2.15E+05 | 1.87E+05 | 4.80E+05 |
| 2988.5   | 45.9     | 34  | 3.86E+05 | 6.13E+05 | 9.61E+05 | 3.95E+05 | 1.06E+06 | 1.03E+06 | 1.30E+05 | 5.21E+05 | 4.60E+05 | 3.27E+05 | 9.49E+05 |
| 1944.9   | 37.3     | 60  | 4.00E+06 | 3.00E+06 | 8.61E+06 | 1.55E+06 | 1.15E+07 | 1.08E+07 | 3.02E+06 | 5.79E+06 | 3.75E+06 | 3.66E+06 | 7.29E+06 |
| 1375.7   | 38.5     | 14  | 2.26E+05 | 3.06E+05 | 3.26E+05 | 1.54E+05 | 3.92E+05 | 3.78E+05 | 2.06E+05 | 3.03E+05 | 1.59E+05 | 1.61E+05 | 2.94E+05 |
| 1792.0   | 52.0     | 44  | 7.70E+05 | 6.82E+05 | 1.35E+06 | 5.18E+05 | 1.81E+06 | 1.74E+06 | 2.51E+05 | 1.08E+06 | 5.27E+05 | 3.42E+05 | 1.52E+06 |
| 2670.3   | 48.9     | 26  | 7.38E+05 | 9.70E+05 | 8.55E+05 | 5.54E+05 | 1.17E+06 | 1.05E+06 | 3.26E+05 | 7.37E+05 | 5.74E+05 | 9.51E+05 | 6.55E+05 |
| 3584.5   | 57.5     | 58  | 3.37E+06 | 4.06E+06 | 7.72E+06 | 3.42E+06 | 9.89E+06 | 9.26E+06 | 6.54E+05 | 6.73E+06 | 2.52E+06 | 1.81E+06 | 7.62E+06 |
| 1602.8   | 43.3     | 17  | 6.77E+05 | 5.41E+05 | 9.01E+05 | 3.17E+05 | 1.77E+06 | 1.52E+06 | 2.99E+05 | 7.97E+05 | 4.02E+05 | 4.62E+05 | 7.94E+05 |
| 1843.9   | 38.9     | 9   | 1.73E+05 | 1.31E+05 | 1.33E+05 | 6.85E+04 | 2.54E+05 | 2.09E+05 | 7.69E+04 | 1.47E+05 | 1.04E+05 | 1.15E+05 | 1.30E+05 |
| 1716.8   | 26.9     | 10  | 4.19E+05 | 3.43E+05 | 6.48E+05 | 4.44E+04 | 7.15E+05 | 6.31E+05 | 3.37E+05 | 4.44E+05 | 2.34E+05 | 2.51E+05 | 4.14E+05 |
| 1162.6   | 45.6     | 37  | 1.84E+06 | 1.77E+06 | 3.44E+06 | 1.18E+06 | 4.34E+06 | 4.17E+06 | 1.56E+06 | 2.03E+06 | 1.23E+06 | 1.65E+06 | 2.79E+06 |
| 2249.1   | 22.3     | 28  | 1.15E+05 | 1.84E+05 | 2.29E+05 | 0.00E+00 | 4.07E+05 | 3.59E+05 | 1.38E+05 | 7.37E+04 | 8.32E+04 | 1.02E+05 | 1.72E+05 |
| 2787.3   | 37.7     | 15  | 1.08E+05 | 1.17E+05 | 1.75E+05 | 5.10E+04 | 2.34E+05 | 2.26E+05 | 8.89E+04 | 1.64E+05 | 1.17E+05 | 6.11E+04 | 1.37E+05 |
| 1363.7   | 42.3     | 9   | 1.82E+05 | 3.12E+05 | 4.06E+05 | 1.06E+05 | 3.43E+05 | 2.93E+05 | 8.30E+04 | 2.60E+05 | 1.78E+05 | 5.25E+04 | 4.07E+05 |
| 2217.2   | 53.0     | 19  | 9.77E+05 | 1.60E+06 | 1.76E+06 | 5.83E+05 | 1.69E+06 | 1.58E+06 | 3.86E+05 | 1.04E+06 | 6.08E+05 | 4.47E+05 | 1.39E+06 |
| 1712.8   | 28.3     | 84  | 2.15E+06 | 1.82E+06 | 3.65E+06 | 1.06E+06 | 4.58E+06 | 3.66E+06 | 2.20E+06 | 1.78E+06 | 1.44E+06 | 1.40E+06 | 2.72E+06 |
| 1081.5   | 33.7     | 14  | 2.45E+05 | 1.90E+05 | 3.75E+05 | 1.46E+05 | 3.98E+05 | 3.44E+05 | 1.81E+05 | 2.14E+05 | 1.84E+05 | 1.46E+05 | 3.03E+05 |
| 1602.8   | 48.2     | 91  | 4.84E+06 | 6.67E+06 | 7.39E+06 | 3.01E+06 | 9.79E+06 | 8.77E+06 | 3.40E+06 | 5.93E+06 | 3.49E+06 | 2.40E+06 | 8.03E+06 |
| 1603.7   | 31.5     | 11  | 4.49E+05 | 1.95E+05 | 6.67E+05 | 1.98E+05 | 9.94E+05 | 8.63E+05 | 4.15E+05 | 5.53E+05 | 3.12E+05 | 2.29E+05 | 6.36E+05 |
| 2080.1   | 67.6     | 26  | 3.91E+05 | 3.41E+05 | 8.38E+05 | 2.70E+05 | 8.50E+05 | 8.11E+05 | 5.95E+04 | 3.56E+05 | 1.27E+05 | 9.28E+04 | 1.56E+05 |
| 1112.5   | 18.4     | 10  | 1.31E+06 | 1.20E+06 | 1.29E+06 | 8.03E+02 | 1.35E+06 | 2.28E+02 | 1.34E+06 | 1.26E+06 | 6.12E+05 | 3.58E+05 | 8.68E+05 |
| 2812.3   | 44.0     | 8   | 1.12E+05 | 1.12E+05 | 1.94E+05 | 9.02E+04 | 2.39E+05 | 2.40E+05 | 5.38E+04 | 9.30E+04 | 7.37E+04 | 4.97E+04 | 1.15E+05 |
| 1624.8   | 45.3     | 1   | 7.76E+04 | 1.73E+05 | 1.75E+05 | 8.72E+04 | 2.16E+05 | 2.27E+05 | 6.69E+04 | 1.38E+05 | 6.32E+04 | 3.69E+04 | 1.41E+05 |
| 2749.3   | 59.8     | 8   | 8.77E+04 | 9.36E+04 | 1.13E+05 | 2.72E+04 | 1.53E+05 | 1.47E+05 | 2.04E+04 | 9.34E+04 | 6.71E+04 | 4.37E+04 | 1.05E+05 |

14 Supplemental Table S2

| Null-3   | Null-4   | Null-5   | Null-6   | Null-7   | Null-8   | Ratio<br>Null/WT | SD       | p value  | N Ratio | N SD     | N p value | Avg_WT   | Avg_Null |
|----------|----------|----------|----------|----------|----------|------------------|----------|----------|---------|----------|-----------|----------|----------|
| 2.63E+06 | 1.68E+06 | 2.19E+06 | 2.75E+06 | 1.86E+06 | 3.68E+06 | 0.93             | 7.33E-01 | 6.99E-01 | 1.15    | 8.97E-01 | 4.64E-01  | 1.51E+06 | 1.74E+06 |
| 9.79E+05 | 1.30E+06 | 1.14E+06 | 2.39E+06 | 1.66E+06 | 1.31E+06 | 0.87             | 7.19E-01 | 5.18E-01 | 1.15    | 6.55E-01 | 3.24E-01  | 8.88E+05 | 1.02E+06 |
| 2.11E+05 | 2.91E+05 | 3.50E+05 | 5.37E+05 | 3.85E+05 | 3.66E+05 | 0.89             | 6.98E-01 | 5.64E-01 | 1.15    | 6.86E-01 | 3.48E-01  | 2.24E+05 | 2.58E+05 |
| 5.68E+05 | 3.92E+05 | 4.08E+05 | 6.64E+05 | 5.00E+05 | 5.60E+05 | 0.89             | 7.87E-01 | 5.93E-01 | 1.15    | 8.77E-01 | 4.65E-01  | 3.55E+05 | 4.07E+05 |
| 4.01E+06 | 3.94E+06 | 5.25E+06 | 5.10E+06 | 6.03E+06 | 5.05E+06 | 0.87             | 7.60E-01 | 5.81E-01 | 1.15    | 7.96E-01 | 4.44E-01  | 3.28E+06 | 3.76E+06 |
| 1.88E+05 | 1.98E+05 | 2.55E+05 | 3.37E+05 | 3.09E+05 | 2.09E+05 | 0.90             | 5.29E-01 | 4.62E-01 | 1.15    | 5.40E-01 | 2.44E-01  | 1.58E+05 | 1.81E+05 |
| 6.57E+05 | 6.39E+05 | 7.13E+05 | 1.31E+06 | 9.59E+05 | 7.61E+05 | 0.89             | 9.08E-01 | 6.47E-01 | 1.15    | 9.77E-01 | 5.14E-01  | 5.50E+05 | 6.31E+05 |
| 4.56E+05 | 6.13E+05 | 6.08E+05 | 7.48E+05 | 7.88E+05 | 6.36E+05 | 0.88             | 4.94E-01 | 3.84E-01 | 1.15    | 7.08E-01 | 3.79E-01  | 4.53E+05 | 5.20E+05 |
| 2.76E+06 | 3.49E+06 | 3.26E+06 | 7.55E+06 | 6.06E+06 | 5.67E+06 | 0.90             | 9.72E-01 | 7.05E-01 | 1.15    | 1.04E+00 | 5.39E-01  | 3.00E+06 | 3.44E+06 |
| 6.62E+05 | 6.32E+05 | 6.56E+05 | 9.18E+05 | 7.01E+05 | 6.63E+05 | 0.86             | 7.21E-01 | 5.36E-01 | 1.15    | 7.51E-01 | 4.35E-01  | 4.49E+05 | 5.14E+05 |
| 7.89E+04 | 1.19E+05 | 1.11E+05 | 1.87E+05 | 1.34E+05 | 1.61E+05 | 0.90             | 6.03E-01 | 5.35E-01 | 1.15    | 5.98E-01 | 3.04E-01  | 8.38E+04 | 9.60E+04 |
| 2.56E+05 | 3.86E+05 | 2.69E+05 | 4.78E+05 | 4.27E+05 | 5.41E+05 | 0.89             | 7.10E-01 | 5.81E-01 | 1.14    | 6.66E-01 | 3.68E-01  | 2.43E+05 | 2.78E+05 |
| 1.53E+06 | 1.88E+06 | 1.90E+06 | 2.72E+06 | 2.17E+06 | 1.78E+06 | 0.86             | 6.41E-01 | 4.57E-01 | 1.14    | 6.35E-01 | 3.43E-01  | 1.34E+06 | 1.54E+06 |
| 1.48E+05 | 1.25E+05 | 1.13E+05 | 1.24E+05 | 9.57E+04 | 3.07E+05 | 0.84             | 1.03E+00 | 5.90E-01 | 1.14    | 1.12E+00 | 5.80E-01  | 9.66E+04 | 1.10E+05 |
| 1.11E+05 | 1.14E+05 | 1.18E+05 | 2.08E+05 | 1.35E+05 | 1.58E+05 | 0.91             | 6.91E-01 | 6.32E-01 | 1.14    | 7.31E-01 | 4.04E-01  | 8.38E+04 | 9.57E+04 |
| 1.51E+05 | 1.88E+05 | 1.33E+05 | 2.96E+05 | 2.54E+05 | 3.16E+05 | 0.93             | 9.04E-01 | 7.77E-01 | 1.14    | 1.00E+00 | 5.51E-01  | 1.42E+05 | 1.62E+05 |
| 7.90E+05 | 8.07E+05 | 7.93E+05 | 1.34E+06 | 1.31E+06 | 1.30E+06 | 0.90             | 7.36E-01 | 6.09E-01 | 1.14    | 7.39E-01 | 4.13E-01  | 6.53E+05 | 7.45E+05 |
| 1.61E+06 | 1.93E+06 | 1.80E+06 | 3.18E+06 | 2.48E+06 | 2.08E+06 | 0.87             | 6.58E-01 | 4.76E-01 | 1.14    | 5.90E-01 | 3.13E-01  | 1.40E+06 | 1.59E+06 |
| 1.67E+05 | 1.91E+05 | 2.57E+05 | 2.85E+05 | 2.50E+05 | 1.80E+05 | 0.88             | 5.60E-01 | 4.30E-01 | 1.14    | 5.78E-01 | 3.03E-01  | 1.46E+05 | 1.66E+05 |
| 3.73E+06 | 4.90E+06 | 4.08E+06 | 7.41E+06 | 6.02E+06 | 5.76E+06 | 0.89             | 6.89E-01 | 5.60E-01 | 1.14    | 6.90E-01 | 3.92E-01  | 3.41E+06 | 3.88E+06 |
| 2.74E+05 | 2.80E+05 | 6.15E+05 | 4.20E+05 | 6.36E+05 | 5.40E+05 | 0.88             | 8.19E-01 | 5.88E-01 | 1.14    | 8.73E-01 | 4.97E-01  | 2.93E+05 | 3.33E+05 |
| 2.66E+05 | 2.09E+05 | 3.23E+05 | 9.41E+05 | 6.63E+05 | 5.03E+05 | 0.88             | 1.24E+00 | 7.08E-01 | 1.14    | 1.36E+00 | 6.72E-01  | 2.45E+05 | 2.79E+05 |
| 4.92E+05 | 7.49E+05 | 8.25E+05 | 1.58E+06 | 9.60E+05 | 1.18E+06 | 0.94             | 9.95E-01 | 8.25E-01 | 1.14    | 1.06E+00 | 5.78E-01  | 5.59E+05 | 6.35E+05 |
| 1.00E+05 | 1.13E+05 | 1.05E+05 | 1.64E+05 | 1.66E+05 | 1.14E+05 | 0.86             | 7.34E-01 | 5.12E-01 | 1.14    | 6.99E-01 | 4.08E-01  | 7.50E+04 | 8.52E+04 |
| 6.19E+04 | 1.07E+05 | 8.99E+04 | 2.05E+05 | 1.65E+05 | 1.76E+05 | 0.90             | 8.60E-01 | 6.64E-01 | 1.13    | 8.72E-01 | 5.12E-01  | 7.74E+04 | 8.78E+04 |
| 5.58E+04 | 6.38E+04 | 5.75E+04 | 1.36E+05 | 1.11E+05 | 7.48E+04 | 0.91             | 8.35E-01 | 6.74E-01 | 1.13    | 8.48E-01 | 4.97E-01  | 5.21E+04 | 5.90E+04 |

14 Supplemental Table S2



| Accession # | Protein                                                   | # of Pep | PEPTIDE                           | Modification                                          | XCorr | Charge | m/z [Da] |
|-------------|-----------------------------------------------------------|----------|-----------------------------------|-------------------------------------------------------|-------|--------|----------|
| 153791270   | Laminin subunit gamma-1                                   | 12       | MAAANVSITQPESTGEPNNMTLLAE<br>EAR  | Deamidated(18)Deamidated(19)Oxidation(1)Oxidation(20) | 7.7   | 3      | 993.8    |
| 156616286   | Collagen alpha-6(VI) chain                                | 11       | QMGGNTNTGAALNFTLK                 | Deamidated(13)Oxidation(2)                            | 4.91  | 2      | 877.9    |
| 156616286   | Collagen alpha-6(VI) chain                                | 11       | VGLVTVSNETR                       | Deamidated(8)                                         | 3.68  | 2      | 620.3    |
| 568962784   | Laminin subunit beta-2                                    | 4        | ANASTFAVPSVNSADTR                 | Deamidated(2)                                         | 4.8   | 2      | 947.0    |
| 153791270   | Laminin subunit gamma-1                                   | 12       | FLGNQVLSYGQNLFSFR                 | Deamidated(12)                                        | 5.96  | 2      | 1039.5   |
| 148747408   | Laminin subunit alpha-4                                   | 7        | HVTDMNSTIHLR                      | Deamidated(6)Oxidation(5)                             | 4.76  | 3      | 518.6    |
| 19527130    | EMILIN-1                                                  | 7        | LNLTAQLSQLEGLLQAR                 | Deamidated(2)                                         | 6.38  | 2      | 970.5    |
| 6755775     | Transforming growth factor beta-1                         | 2        | LASPPSQGEVPPGPLPEAVLALYNSTR       | Deamidated(24)                                        | 5.56  | 3      | 921.2    |
| 755517036   | complement component C1SA                                 | 1        | GVDSCHGDSGGAFQVPNVTPK             | Carbamidomethyl(5)Deamidated(19)                      | 3.79  | 3      | 816.4    |
| 568973925   | Delta-sarcoglycan                                         | 1        | NVTVNILNDQTK                      | Deamidated(1)                                         | 3.89  | 2      | 680.4    |
| 45429999    | Toll-like receptor 13                                     | 3        | IQSVNNSFEGLSSLK                   | Deamidated(6)                                         | 3.36  | 2      | 812.4    |
| 85719301    | carcinoembryonic antigen-related cell adhesion molecule 1 | 4        | EIIYSNGSLLFQMITMK                 | Deamidated(6)Oxidation(13)Oxidation(16)               | 4.06  | 3      | 674.3    |
| 153791389   | Integrin alpha-1                                          | 13       | HFFNVSDELALVTIVK                  | Deamidated(4)                                         | 4.46  | 3      | 611.7    |
| 755500860   | GPI transamidase component PIG-T                          | 2        | TYAVYDLFDTAMINNSR                 | Deamidated(14)Oxidation(12)                           | 3.99  | 2      | 1006.0   |
| 568920137   | Laminin subunit alpha-5                                   | 15       | LEVDTQSNHTTGR                     | Deamidated(8)                                         | 3.47  | 2      | 729.8    |
| 568956867   | CD97 antigen                                              | 2        | DFNPATVNYTIQK                     | Deamidated(8)                                         | 3.73  | 2      | 756.4    |
| 89242146    | Niemann Pick type C1                                      | 6        | TEQLIIQAPNTSVHIYEPYPAGADVPGPPLNK  | Deamidated(10)                                        | 4.75  | 4      | 895.2    |
| 27370240    | Leucyl-cystinyl aminopeptidase                            | 8        | DIILHSTGHNISR                     | Deamidated(10)                                        | 3.47  | 2      | 732.4    |
| 19527008    | Group XV phospholipase A2                                 | 2        | VSLQELPGSEHIEMLANATTLAYLK         | Deamidated(17)Oxidation(14)                           | 4.69  | 3      | 915.8    |
| 22203747    | Collagen alpha-2(VI) chain                                | 6        | NMTLFSDLVAEK                      | Deamidated(1)Oxidation(2)                             | 3.81  | 2      | 692.8    |
| 568913811   | Protein GPR107                                            | 1        | DGYMVVNVSSLSVNEPEGATDKDAEIGFSLDR  | Deamidated(7)Oxidation(4)                             | 7.99  | 3      | 1144.5   |
| 156616286   | Collagen alpha-6(VI) chain                                | 11       | DLSVFAPNMTEIHK                    | Deamidated(8)Oxidation(9)                             | 3.13  | 2      | 797.9    |
| 122937370   | Multimerin-2                                              | 4        | AQELPGANGSLVMASAAAAARPEPESLQAR    | Deamidated(8)Oxidation(13)                            | 4.4   | 3      | 994.2    |
| 29789239    | N-acetylglucosamine-6-sulfatase                           | 1        | YYNYTSLINGK                       | Deamidated(3)Deamidated(9)                            | 2.63  | 2      | 669.3    |
| 153791270   | Laminin subunit gamma-1                                   | 12       | LLNNLTSIK                         | Deamidated(4)                                         | 2.59  | 2      | 508.8    |
| 133778978   | Cation-independent mannose-6-phosphate receptor           | 12       | HGNLYDLKPLGLNDTIVSVGEYTYLRLR      | Deamidated(13)                                        | 6.57  | 4      | 779.4    |
| 161086902   | Voltage-dependent calcium channel subunit alpha-2/delta-  | 6        | EDFASNEVVYNAKDDLDPERNES<br>EPGSQR | Deamidated(22)                                        | 4.88  | 4      | 869.4    |
| 568909422   | hemocentin 1                                              | 2        | YDLSVHAPPSIIGNHGVPEVSVVEK         | Deamidated(20)                                        | 4     | 4      | 690.4    |

| MH+ [Da] | RT [min] | PSM | WT-1     | WT-2     | WT-3     | WT-4     | WT-5     | WT-5-2   | WT-6     | WT-7     | WT-8     | Null-1   | Null-2   |
|----------|----------|-----|----------|----------|----------|----------|----------|----------|----------|----------|----------|----------|----------|
| 2979.4   | 42.3     | 76  | 2.16E+06 | 2.50E+06 | 4.09E+06 | 1.71E+06 | 7.68E+06 | 6.75E+06 | 1.84E+06 | 3.95E+06 | 1.77E+06 | 2.06E+06 | 4.44E+06 |
| 1754.8   | 40.9     | 18  | 2.02E+05 | 1.91E+05 | 4.24E+05 | 1.66E+05 | 4.83E+05 | 4.58E+05 | 1.06E+05 | 2.83E+05 | 1.41E+05 | 1.63E+05 | 3.59E+05 |
| 1239.6   | 31.7     | 25  | 1.34E+06 | 1.28E+06 | 2.13E+06 | 9.13E+05 | 3.03E+06 | 2.70E+06 | 1.17E+06 | 1.61E+06 | 9.75E+05 | 1.08E+06 | 1.71E+06 |
| 1892.9   | 39.3     | 77  | 9.14E+05 | 1.10E+06 | 1.61E+06 | 8.07E+05 | 2.24E+06 | 2.07E+06 | 1.01E+06 | 8.03E+05 | 6.22E+05 | 8.16E+05 | 1.37E+06 |
| 2078.0   | 59.7     | 115 | 9.21E+05 | 1.06E+06 | 2.48E+06 | 7.06E+05 | 1.66E+06 | 1.38E+06 | 1.94E+05 | 1.34E+06 | 5.12E+05 | 2.67E+05 | 9.93E+05 |
| 1553.8   | 28.8     | 45  | 3.60E+06 | 3.51E+06 | 6.14E+06 | 4.24E+05 | 7.94E+06 | 6.75E+06 | 3.71E+06 | 3.13E+06 | 2.63E+06 | 2.45E+06 | 3.91E+06 |
| 1940.1   | 64.0     | 153 | 6.60E+04 | 9.67E+04 | 1.59E+05 | 6.16E+04 | 1.78E+05 | 1.71E+05 | 3.20E+03 | 1.13E+05 | 3.54E+04 | 4.85E+04 | 1.55E+05 |
| 2761.4   | 64.7     | 41  | 2.96E+05 | 7.42E+05 | 8.40E+05 | 2.55E+05 | 8.87E+05 | 7.98E+05 | 9.31E+04 | 5.00E+05 | 2.49E+05 | 2.22E+05 | 5.10E+05 |
| 2447.1   | 47.6     | 3   | 3.80E+04 | 8.89E+04 | 1.49E+05 | 4.51E+04 | 1.26E+05 | 1.37E+05 | 2.43E+04 | 3.89E+04 | 3.08E+04 | 3.41E+04 | 1.05E+05 |
| 1359.7   | 40.4     | 25  | 7.30E+05 | 5.09E+05 | 9.36E+05 | 6.00E+05 | 1.35E+06 | 1.26E+06 | 4.97E+05 | 7.74E+05 | 4.83E+05 | 5.02E+05 | 8.90E+05 |
| 1623.8   | 43.8     | 12  | 1.70E+05 | 1.26E+05 | 1.34E+05 | 4.87E+04 | 1.44E+05 | 1.13E+05 | 1.12E+05 | 9.92E+04 | 6.87E+04 | 4.34E+04 | 1.18E+05 |
| 2021.0   | 56.9     | 61  | 4.69E+05 | 4.67E+05 | 9.46E+05 | 3.43E+05 | 1.14E+06 | 9.08E+05 | 1.78E+05 | 6.42E+05 | 4.89E+05 | 3.32E+05 | 7.32E+05 |
| 1833.0   | 60.9     | 1   | 1.24E+05 | 2.31E+05 | 3.54E+05 | 9.72E+04 | 2.08E+05 | 1.38E+05 | 3.80E+04 | 1.62E+05 | 6.55E+04 | 1.72E+04 | 1.27E+05 |
| 2010.9   | 55.9     | 36  | 1.85E+05 | 2.62E+05 | 2.60E+05 | 1.32E+05 | 3.98E+05 | 3.09E+05 | 1.09E+05 | 2.15E+05 | 1.36E+05 | 1.29E+05 | 2.49E+05 |
| 1458.7   | 19.8     | 13  | 1.27E+05 | 1.13E+05 | 1.75E+05 | 1.56E+01 | 2.29E+05 | 2.21E+05 | 8.68E+04 | 1.12E+05 | 7.63E+04 | 6.71E+04 | 1.35E+05 |
| 1511.7   | 42.4     | 14  | 3.96E+05 | 4.67E+05 | 6.78E+05 | 3.09E+05 | 8.47E+05 | 6.91E+05 | 3.66E+05 | 3.57E+05 | 2.78E+05 | 2.41E+05 | 5.18E+05 |
| 3577.8   | 56.3     | 9   | 2.41E+05 | 3.52E+05 | 4.91E+05 | 1.56E+05 | 4.51E+05 | 3.79E+05 | 3.00E+04 | 2.87E+05 | 1.21E+05 | 7.85E+04 | 3.50E+05 |
| 1463.8   | 26.4     | 39  | 1.72E+06 | 1.33E+06 | 2.26E+06 | 9.59E+02 | 2.38E+06 | 1.79E+06 | 1.14E+06 | 1.12E+06 | 8.82E+05 | 6.84E+05 | 1.33E+06 |
| 2745.4   | 57.7     | 14  | 2.04E+05 | 2.37E+05 | 2.70E+05 | 9.30E+04 | 3.68E+05 | 3.24E+05 | 3.71E+04 | 2.15E+05 | 1.27E+05 | 6.91E+04 | 2.04E+05 |
| 1384.7   | 52.8     | 101 | 1.42E+07 | 1.18E+07 | 2.65E+07 | 1.13E+07 | 4.22E+07 | 4.13E+07 | 1.15E+07 | 2.32E+07 | 1.04E+07 | 1.14E+07 | 1.91E+07 |
| 3431.6   | 54.0     | 15  | 2.15E+05 | 3.37E+05 | 5.74E+05 | 1.57E+05 | 3.68E+05 | 3.23E+05 | 3.87E+04 | 2.61E+05 | 1.07E+05 | 4.52E+04 | 3.99E+05 |
| 1594.8   | 52.7     | 23  | 8.14E+05 | 9.11E+05 | 1.79E+06 | 9.06E+05 | 2.10E+06 | 2.02E+06 | 6.79E+05 | 1.60E+06 | 7.39E+05 | 7.85E+05 | 1.64E+06 |
| 2980.5   | 40.8     | 16  | 3.09E+05 | 2.10E+05 | 3.86E+05 | 1.55E+05 | 7.42E+05 | 5.85E+05 | 1.44E+05 | 2.68E+05 | 1.49E+05 | 1.80E+05 | 3.70E+05 |
| 1337.6   | 40.7     | 1   | 1.37E+05 | 1.04E+05 | 1.90E+05 | 7.86E+04 | 2.32E+05 | 1.90E+05 | 4.51E+04 | 8.97E+04 | 6.57E+04 | 8.27E+04 | 1.69E+05 |
| 1016.6   | 39.1     | 62  | 2.00E+05 | 2.47E+05 | 3.24E+05 | 1.34E+05 | 5.40E+05 | 4.74E+05 | 2.22E+05 | 2.40E+05 | 1.81E+05 | 1.95E+05 | 2.85E+05 |
| 3114.6   | 58.4     | 21  | 2.88E+05 | 3.88E+05 | 4.64E+05 | 1.89E+05 | 3.99E+05 | 3.25E+05 | 2.37E+04 | 2.94E+05 | 1.64E+05 | 9.63E+04 | 2.04E+05 |
| 3474.5   | 37.8     | 8   | 9.54E+04 | 3.71E+04 | 1.43E+05 | 3.29E+04 | 1.80E+05 | 1.98E+05 | 1.98E+04 | 4.51E+04 | 5.16E+04 | 8.04E+04 | 7.87E+04 |
| 2758.4   | 42.8     | 3   | 3.98E+05 | 7.36E+05 | 5.88E+05 | 1.19E+05 | 6.35E+05 | 5.39E+05 | 3.65E+05 | 2.93E+05 | 1.02E+05 | 1.67E+05 | 3.74E+05 |

14 Supplemental Table S2

| Null-3   | Null-4   | Null-5   | Null-6   | Null-7   | Null-8   | Ratio<br>Null/WT | SD       | p value  | N Ratio | N SD     | N p value | Avg_WT   | Avg_Null |
|----------|----------|----------|----------|----------|----------|------------------|----------|----------|---------|----------|-----------|----------|----------|
| 2.07E+06 | 2.78E+06 | 2.77E+06 | 4.37E+06 | 3.39E+06 | 2.90E+06 | 0.86             | 7.88E-01 | 5.44E-01 | 1.13    | 8.03E-01 | 4.89E-01  | 2.02E+06 | 2.29E+06 |
| 1.73E+05 | 2.44E+05 | 1.54E+05 | 3.02E+05 | 2.28E+05 | 2.55E+05 | 0.86             | 7.23E-01 | 5.04E-01 | 1.13    | 7.55E-01 | 4.53E-01  | 1.54E+05 | 1.74E+05 |
| 1.16E+06 | 1.43E+06 | 1.28E+06 | 1.81E+06 | 1.66E+06 | 1.45E+06 | 0.86             | 5.49E-01 | 4.08E-01 | 1.13    | 4.88E-01 | 2.92E-01  | 9.56E+05 | 1.08E+06 |
| 9.13E+05 | 9.11E+05 | 7.58E+05 | 1.52E+06 | 1.09E+06 | 1.00E+06 | 0.84             | 6.14E-01 | 3.91E-01 | 1.13    | 5.67E-01 | 3.25E-01  | 6.91E+05 | 7.81E+05 |
| 6.83E+05 | 7.01E+05 | 7.47E+05 | 2.09E+06 | 1.56E+06 | 1.20E+06 | 0.91             | 1.05E+00 | 7.28E-01 | 1.13    | 1.12E+00 | 6.14E-01  | 6.50E+05 | 7.35E+05 |
| 2.80E+06 | 3.60E+06 | 2.98E+06 | 5.34E+06 | 4.08E+06 | 3.94E+06 | 0.86             | 6.95E-01 | 5.12E-01 | 1.13    | 6.42E-01 | 4.09E-01  | 2.38E+06 | 2.69E+06 |
| 5.87E+04 | 6.51E+04 | 5.27E+04 | 7.94E+04 | 1.15E+05 | 1.06E+05 | 0.87             | 9.27E-01 | 6.00E-01 | 1.13    | 1.02E+00 | 5.90E-01  | 5.50E+04 | 6.20E+04 |
| 4.69E+05 | 3.78E+05 | 3.70E+05 | 6.89E+05 | 5.04E+05 | 4.42E+05 | 0.87             | 7.69E-01 | 5.46E-01 | 1.13    | 8.46E-01 | 5.30E-01  | 2.95E+05 | 3.32E+05 |
| 7.99E+04 | 5.34E+04 | 3.26E+04 | 4.72E+04 | 7.55E+04 | 7.18E+04 | 0.83             | 8.84E-01 | 5.09E-01 | 1.12    | 1.06E+00 | 6.13E-01  | 4.14E+04 | 4.66E+04 |
| 4.50E+05 | 5.02E+05 | 6.84E+05 | 1.00E+06 | 9.49E+05 | 5.03E+05 | 0.86             | 6.45E-01 | 4.43E-01 | 1.12    | 6.16E-01 | 3.92E-01  | 4.51E+05 | 5.07E+05 |
| 1.07E+05 | 7.47E+04 | 9.51E+04 | 1.78E+05 | 9.95E+04 | 7.87E+04 | 0.88             | 6.39E-01 | 4.80E-01 | 1.12    | 7.23E-01 | 4.79E-01  | 6.56E+04 | 7.38E+04 |
| 6.26E+05 | 4.39E+05 | 4.93E+05 | 6.97E+05 | 5.64E+05 | 4.03E+05 | 0.86             | 6.70E-01 | 4.84E-01 | 1.12    | 7.85E-01 | 5.07E-01  | 3.60E+05 | 4.03E+05 |
| 8.11E+04 | 1.10E+05 | 1.03E+05 | 2.66E+05 | 2.47E+05 | 1.98E+05 | 0.91             | 1.10E+00 | 7.59E-01 | 1.12    | 1.19E+00 | 6.63E-01  | 9.04E+04 | 1.01E+05 |
| 1.50E+05 | 1.67E+05 | 1.62E+05 | 2.56E+05 | 2.53E+05 | 1.83E+05 | 0.87             | 5.98E-01 | 4.40E-01 | 1.12    | 5.53E-01 | 3.66E-01  | 1.28E+05 | 1.43E+05 |
| 1.02E+05 | 8.70E+04 | 1.06E+05 | 1.41E+05 | 1.03E+05 | 1.25E+05 | 0.86             | 6.87E-01 | 4.94E-01 | 1.12    | 6.97E-01 | 4.90E-01  | 7.22E+04 | 8.08E+04 |
| 3.56E+05 | 3.32E+05 | 3.97E+05 | 5.48E+05 | 4.34E+05 | 5.00E+05 | 0.85             | 5.66E-01 | 3.66E-01 | 1.12    | 4.84E-01 | 3.04E-01  | 2.76E+05 | 3.08E+05 |
| 1.49E+05 | 1.95E+05 | 1.52E+05 | 3.90E+05 | 3.37E+05 | 3.26E+05 | 0.89             | 9.13E-01 | 6.43E-01 | 1.12    | 9.56E-01 | 5.96E-01  | 1.58E+05 | 1.77E+05 |
| 9.04E+05 | 1.00E+06 | 1.27E+06 | 1.65E+06 | 1.52E+06 | 1.40E+06 | 0.87             | 6.90E-01 | 5.12E-01 | 1.12    | 6.51E-01 | 4.68E-01  | 8.05E+05 | 8.98E+05 |
| 1.47E+05 | 1.86E+05 | 1.27E+05 | 2.82E+05 | 2.22E+05 | 2.34E+05 | 0.88             | 7.80E-01 | 5.78E-01 | 1.12    | 7.90E-01 | 5.32E-01  | 1.20E+05 | 1.34E+05 |
| 1.01E+07 | 1.36E+07 | 1.56E+07 | 3.05E+07 | 2.74E+07 | 1.92E+07 | 0.86             | 8.62E-01 | 5.61E-01 | 1.12    | 8.44E-01 | 5.61E-01  | 1.20E+07 | 1.34E+07 |
| 1.36E+05 | 1.93E+05 | 2.10E+05 | 3.14E+05 | 2.81E+05 | 2.81E+05 | 0.88             | 9.49E-01 | 6.34E-01 | 1.11    | 1.06E+00 | 6.44E-01  | 1.50E+05 | 1.68E+05 |
| 8.66E+05 | 1.17E+06 | 8.85E+05 | 1.25E+06 | 1.08E+06 | 1.13E+06 | 0.86             | 6.01E-01 | 4.12E-01 | 1.11    | 6.67E-01 | 4.73E-01  | 7.38E+05 | 8.22E+05 |
| 1.93E+05 | 2.31E+05 | 2.42E+05 | 3.75E+05 | 3.70E+05 | 2.20E+05 | 0.83             | 7.92E-01 | 4.87E-01 | 1.11    | 7.71E-01 | 5.39E-01  | 1.81E+05 | 2.01E+05 |
| 7.58E+04 | 9.97E+04 | 8.28E+04 | 1.24E+05 | 1.09E+05 | 9.61E+04 | 0.83             | 6.70E-01 | 4.04E-01 | 1.11    | 6.85E-01 | 4.83E-01  | 7.03E+04 | 7.82E+04 |
| 2.10E+05 | 2.30E+05 | 2.20E+05 | 2.88E+05 | 2.15E+05 | 2.73E+05 | 0.84             | 5.34E-01 | 3.64E-01 | 1.11    | 5.17E-01 | 3.87E-01  | 1.62E+05 | 1.80E+05 |
| 1.47E+05 | 2.60E+05 | 1.69E+05 | 4.76E+05 | 4.12E+05 | 2.60E+05 | 0.90             | 9.02E-01 | 6.67E-01 | 1.11    | 9.55E-01 | 6.17E-01  | 1.64E+05 | 1.82E+05 |
| 5.03E+04 | 3.47E+04 | 5.43E+04 | 1.40E+05 | 1.08E+05 | 3.94E+04 | 0.82             | 1.04E+00 | 5.54E-01 | 1.11    | 1.17E+00 | 6.86E-01  | 4.90E+04 | 5.45E+04 |
| 2.38E+05 | 3.07E+05 | 2.62E+05 | 6.05E+05 | 4.56E+05 | 4.65E+05 | 0.86             | 8.00E-01 | 5.17E-01 | 1.11    | 8.63E-01 | 5.88E-01  | 2.35E+05 | 2.61E+05 |

14 Supplemental Table S2

| Accession # | Protein                                                                                                  | # of Pep | PEPTIDE                         | Modification                             | XCorr | Charge | m/z [Da] |
|-------------|----------------------------------------------------------------------------------------------------------|----------|---------------------------------|------------------------------------------|-------|--------|----------|
| 170650603   | EGF, latrophilin seven transmembrane domain-containing protein 1                                         | 2        | NSQFDMNSTDLALK                  | Deamidated(7)Oxidation(6)                | 3.77  | 2      | 800.9    |
| 165377045   | integrin alpha 9                                                                                         | 2        | NVPGEIGLNLYNLTAQK               | Deamidated(11)                           | 4.05  | 2      | 1009.0   |
| 75532856    | Laminin, alpha 2                                                                                         | 17       | NLSLNIHGK                       | Deamidated(1)                            | 2.54  | 2      | 498.8    |
| 150378501   | Carboxypeptidase D                                                                                       | 4        | DSVTGSGLENATISVAGINHNITTGR      | Deamidated(10)Deamidated(21)             | 7.42  | 3      | 862.8    |
| 34328417    | Sarcalumenin                                                                                             | 2        | TNVSKFDLPNR                     | Deamidated(2)                            | 3.02  | 2      | 646.3    |
| 161702988   | Apolipoprotein B-100                                                                                     | 2        | LSTSPFALNLTMLPK                 | Deamidated(9)Oxidation(12)               | 3.34  | 2      | 825.4    |
| 156231021   | Kininogen-1                                                                                              | 2        | HSIEHFNNNTDHSFLFTR              | Deamidated(7)Deamidated(8)               | 5.68  | 4      | 580.8    |
| 112293269   | Integrin alpha 7                                                                                         | 3        | NVTLDCAQGTAK                    | Carbamidomethyl(6)Deamidated(1)          | 3.09  | 2      | 639.8    |
| 568998451   | Protein ITFG3                                                                                            | 1        | KPILGHYKPDTLAVVIENGTSIDR        | Deamidated(18)                           | 4.8   | 4      | 660.1    |
| 358030288   | Extracellular matrix protein 1                                                                           | 2        | NVALVAGDTGNATGLGEQGPTR          | Deamidated(1)Deamidated(11)              | 5.88  | 2      | 1050.0   |
| 153791270   | Laminin subunit gamma-1                                                                                  | 12       | VNDNKTAEEALR                    | Deamidated(4)                            | 4.02  | 3      | 477.9    |
| 568972029   | C-type mannose receptor 2                                                                                | 6        | KPNATVEPIQPDR                   | Deamidated(3)                            | 4.55  | 3      | 489.3    |
| 34328278    | Vesicular integral-membrane protein VIP36                                                                | 1        | VFPYISVMVNNGLSYDHSK             | Deamidated(10)Deamidated(11)Oxidation(8) | 3.59  | 2      | 1137.5   |
| 23346525    | CD109 antigen                                                                                            | 3        | DQEMDYIQTVNYTIPQNGIHK           | Deamidated(11)Deamidated(17)Oxidation(4) | 5.45  | 3      | 834.4    |
| 569003077   | Cadherin-2                                                                                               | 6        | VDVIVANLTVTDK                   | Deamidated(7)                            | 3.91  | 2      | 694.4    |
| 568920137   | Laminin subunit alpha-5                                                                                  | 15       | GVHNASLALSANIGR                 | Deamidated(4)                            | 4.45  | 3      | 494.3    |
| 568916058   | Sialoadhesin                                                                                             | 2        | ANTSLELLLEGVR                   | Deamidated(2)                            | 4.32  | 2      | 708.4    |
| 569000449   | Latent-transforming growth factor beta-binding protein 1                                                 | 2        | YGQEQGTAPFQVSNHTGR              | Deamidated(14)                           | 3.51  | 2      | 989.5    |
| 6755466     | Semaphorin-7A                                                                                            | 1        | EDNPDKNPEAPLNVSRL               | Deamidated(13)                           | 4.35  | 3      | 599.3    |
| 339895744   | Collagen alpha 3 chain type                                                                              | 5        | QLINALQINNTAVGHALVLPAR          | Deamidated(9)                            | 8.42  | 3      | 776.4    |
| 254588077   | Multimerin-1                                                                                             | 3        | DTEENLHVLNQLTSEVIFPMDIK         | Deamidated(10)Oxidation(20)              | 4.12  | 3      | 901.4    |
| 568922746   | Ring finger protein 13                                                                                   | 1        | DNSSGTFIVLIR                    | Deamidated(2)                            | 2.9   | 2      | 661.8    |
| 31542814    | Fibroleukin                                                                                              | 3        | LDGSTNFTTR                      | Deamidated(6)                            | 3.22  | 2      | 506.2    |
| 133778955   | H-2 class I histocompatibility antigen, alpha chain (Fragment) MHC class Ia H2-K antigen (Fragment) mRNA | 1        | NGNATLLR                        | Deamidated(1)Deamidated(3)               | 2.95  | 2      | 430.2    |
| 27369644    | Inter-alpha-trypsin inhibitor heavy chain H5                                                             | 2        | TLFPNYFNGSEIVIAGK               | Deamidated(8)                            | 3.86  | 2      | 936.0    |
| 49457857    | Myelin protein zero-like protein 1                                                                       | 2        | EIFVVNGTQGK                     | Deamidated(6)                            | 2.61  | 2      | 596.8    |
| 568971816   | Intercellular adhesion molecule 2                                                                        | 6        | DGLNFSCQAELDLRPHGGYIIR          | Carbamidomethyl(7)Deamidated(4)          | 4.27  | 4      | 633.8    |
| 568971816   | Intercellular adhesion molecule 2                                                                        | 6        | GRETLLKNQTFGGAETVPQEATATFNSTALK | Deamidated(7)Deamidated(25)              | 3.96  | 4      | 793.1    |
| 569018167   | Tenascin-X                                                                                               | 2        | GPFDSEFVVQYQDTENETQALLVDGQDK    | Deamidated(15)                           | 4.75  | 3      | 1053.8   |

14 Supplemental Table S2

| MH+ [Da] | RT [min] | PSM | WT-1     | WT-2     | WT-3     | WT-4     | WT-5     | WT-5-2   | WT-6     | WT-7     | WT-8     | Null-1   | Null-2   |
|----------|----------|-----|----------|----------|----------|----------|----------|----------|----------|----------|----------|----------|----------|
| 1600.7   | 36.0     | 16  | 1.19E+05 | 7.75E+04 | 1.43E+05 | 6.33E+04 | 2.03E+05 | 1.84E+05 | 8.02E+04 | 8.27E+04 | 6.56E+04 | 5.59E+04 | 1.05E+05 |
| 2017.0   | 48.5     | 26  | 7.00E+04 | 1.02E+05 | 1.77E+05 | 6.40E+04 | 1.85E+05 | 1.51E+05 | 1.65E+04 | 1.27E+05 | 5.80E+04 | 4.19E+04 | 1.59E+05 |
| 996.5    | 28.9     | 4   | 1.48E+05 | 1.74E+05 | 2.66E+05 | 7.42E+04 | 2.96E+05 | 2.26E+05 | 1.03E+05 | 1.26E+05 | 7.53E+04 | 8.30E+04 | 1.63E+05 |
| 2586.3   | 47.9     | 16  | 2.73E+05 | 3.40E+05 | 3.49E+05 | 1.54E+05 | 4.24E+05 | 3.99E+05 | 1.15E+05 | 2.35E+05 | 1.50E+05 | 1.22E+05 | 2.48E+05 |
| 1291.7   | 30.4     | 10  | 2.53E+05 | 8.85E+04 | 2.81E+05 | 7.28E+04 | 6.85E+05 | 5.56E+05 | 1.25E+05 | 2.07E+05 | 2.13E+05 | 1.74E+05 | 1.36E+05 |
| 1649.9   | 56.2     | 18  | 6.81E+04 | 1.47E+05 | 2.01E+05 | 1.07E+05 | 2.07E+05 | 1.62E+05 | 7.02E+04 | 1.00E+05 | 1.96E+05 | 7.35E+04 | 1.17E+05 |
| 2320.1   | 30.2     | 47  | 1.02E+05 | 9.84E+04 | 1.85E+05 | 6.10E+04 | 2.57E+05 | 1.88E+05 | 3.75E+04 | 7.89E+04 | 8.65E+04 | 7.77E+04 | 6.56E+04 |
| 1278.6   | 25.9     | 14  | 9.20E+04 | 5.79E+04 | 1.58E+05 | 8.02E+02 | 1.87E+05 | 1.61E+05 | 8.02E+04 | 7.34E+04 | 5.13E+04 | 4.48E+04 | 1.02E+05 |
| 2637.4   | 41.9     | 4   | 6.17E+04 | 6.69E+04 | 1.34E+05 | 2.76E+04 | 1.36E+05 | 1.37E+05 | 1.53E+04 | 6.92E+04 | 4.02E+04 | 3.39E+04 | 7.71E+04 |
| 2099.0   | 38.1     | 31  | 5.10E+05 | 3.99E+05 | 9.36E+05 | 3.79E+05 | 1.42E+06 | 1.24E+06 | 3.19E+05 | 8.41E+05 | 5.33E+05 | 5.94E+05 | 7.60E+05 |
| 1431.7   | 23.1     | 22  | 3.49E+05 | 1.22E+05 | 2.27E+05 | 5.48E+04 | 5.76E+05 | 5.03E+05 | 1.24E+05 | 1.42E+05 | 1.07E+05 | 1.84E+05 | 1.12E+05 |
| 1465.8   | 24.4     | 23  | 6.52E+05 | 4.96E+05 | 8.15E+05 | 1.08E+05 | 9.41E+05 | 7.61E+05 | 4.31E+05 | 4.81E+05 | 3.25E+05 | 2.57E+05 | 5.22E+05 |
| 2274.1   | 46.6     | 55  | 1.50E+05 | 1.76E+05 | 3.51E+05 | 1.15E+05 | 2.93E+05 | 2.54E+05 | 3.91E+04 | 1.90E+05 | 8.93E+04 | 6.55E+04 | 2.06E+05 |
| 2501.2   | 55.2     | 18  | 1.33E+05 | 1.98E+05 | 2.59E+05 | 1.13E+05 | 2.89E+05 | 2.58E+05 | 6.29E+04 | 1.20E+05 | 9.34E+04 | 6.93E+04 | 1.45E+05 |
| 1387.8   | 47.4     | 12  | 5.66E+04 | 6.65E+04 | 1.78E+05 | 7.61E+04 | 2.30E+05 | 2.29E+05 | 4.26E+04 | 2.89E+05 | 1.67E+05 | 3.82E+04 | 3.61E+05 |
| 1480.8   | 33.8     | 12  | 4.04E+05 | 4.05E+05 | 6.87E+05 | 2.49E+05 | 1.04E+06 | 1.09E+06 | 1.69E+05 | 5.42E+05 | 2.83E+05 | 2.33E+05 | 7.99E+05 |
| 1415.8   | 57.0     | 18  | 3.83E+05 | 2.77E+05 | 3.09E+05 | 1.06E+05 | 4.74E+05 | 3.55E+05 | 9.14E+04 | 2.69E+05 | 9.62E+04 | 8.12E+04 | 2.98E+05 |
| 1977.9   | 28.4     | 21  | 3.81E+05 | 3.06E+05 | 6.11E+05 | 2.95E+05 | 8.57E+05 | 7.18E+05 | 3.01E+05 | 3.92E+05 | 1.79E+05 | 2.66E+05 | 4.30E+05 |
| 1795.8   | 27.2     | 12  | 2.29E+05 | 1.07E+05 | 2.67E+05 | 1.48E+05 | 4.90E+05 | 3.53E+05 | 1.43E+05 | 2.03E+05 | 1.89E+05 | 1.76E+05 | 3.17E+05 |
| 2327.3   | 51.6     | 246 | 1.83E+05 | 1.93E+05 | 3.57E+05 | 1.70E+05 | 7.25E+05 | 7.26E+05 | 5.32E+04 | 4.13E+05 | 1.08E+05 | 9.13E+04 | 4.34E+05 |
| 2702.3   | 66.4     | 18  | 1.83E+05 | 4.30E+05 | 5.91E+05 | 2.80E+05 | 4.78E+05 | 4.69E+05 | 4.41E+04 | 4.19E+05 | 1.39E+05 | 6.67E+04 | 1.61E+05 |
| 1322.7   | 55.7     | 7   | 1.15E+05 | 1.32E+05 | 1.56E+05 | 8.03E+04 | 1.94E+05 | 1.70E+05 | 7.91E+04 | 1.14E+05 | 1.20E+05 | 4.70E+04 | 1.60E+05 |
| 1011.5   | 25.9     | 16  | 3.37E+05 | 2.38E+05 | 5.02E+05 | 1.67E+04 | 8.30E+05 | 7.15E+05 | 4.21E+05 | 4.03E+05 | 2.53E+05 | 2.07E+05 | 4.63E+05 |
| 859.5    | 26.4     | 33  | 2.72E+06 | 1.99E+06 | 2.93E+06 | 1.28E+06 | 3.57E+06 | 3.40E+06 | 1.68E+06 | 2.05E+06 | 1.01E+06 | 1.27E+06 | 2.78E+06 |
| 1871.0   | 57.7     | 11  | 1.39E+05 | 1.14E+05 | 1.81E+05 | 1.09E+05 | 2.84E+05 | 2.12E+05 | 3.24E+04 | 1.84E+05 | 8.61E+04 | 1.01E+05 | 1.50E+05 |
| 1192.6   | 35.3     | 1   | 1.81E+05 | 2.47E+05 | 3.12E+05 | 1.28E+05 | 3.22E+05 | 2.78E+05 | 1.87E+05 | 2.02E+05 | 1.52E+05 | 1.17E+05 | 1.92E+05 |
| 2532.2   | 46.8     | 6   | 8.53E+04 | 6.03E+04 | 2.09E+05 | 4.24E+04 | 2.19E+05 | 2.20E+05 | 1.76E+04 | 9.84E+04 | 3.90E+04 | 1.86E+04 | 1.71E+05 |
| 3169.6   | 41.1     | 8   | 7.76E+04 | 8.54E+04 | 1.34E+05 | 3.93E+04 | 3.06E+05 | 3.31E+05 | 5.93E+04 | 1.81E+05 | 4.94E+04 | 9.29E+04 | 1.63E+05 |
| 3159.4   | 65.7     | 22  | 1.00E+05 | 6.65E+04 | 1.74E+05 | 6.96E+04 | 2.19E+05 | 2.90E+05 | 2.42E+04 | 1.71E+05 | 7.37E+04 | 8.20E+04 | 1.75E+05 |

14 Supplemental Table S2

| Null-3   | Null-4   | Null-5   | Null-6   | Null-7   | Null-8   | Ratio<br>Null/WT | SD       | p value  | N Ratio | N SD     | N p value | Avg_WT   | Avg_Null |
|----------|----------|----------|----------|----------|----------|------------------|----------|----------|---------|----------|-----------|----------|----------|
| 8.64E+04 | 7.02E+04 | 9.07E+04 | 1.27E+05 | 1.25E+05 | 1.04E+05 | 0.84             | 6.12E-01 | 3.84E-01 | 1.11    | 5.29E-01 | 3.96E-01  | 6.37E+04 | 7.06E+04 |
| 5.96E+04 | 7.65E+04 | 9.02E+04 | 1.40E+05 | 7.63E+04 | 8.42E+04 | 0.86             | 8.49E-01 | 5.51E-01 | 1.11    | 9.51E-01 | 6.30E-01  | 6.06E+04 | 6.71E+04 |
| 1.02E+05 | 1.16E+05 | 8.07E+04 | 2.67E+05 | 2.00E+05 | 1.14E+05 | 0.85             | 8.14E-01 | 5.01E-01 | 1.11    | 7.98E-01 | 5.71E-01  | 9.27E+04 | 1.03E+05 |
| 1.68E+05 | 1.82E+05 | 2.55E+05 | 3.14E+05 | 3.12E+05 | 2.69E+05 | 0.86             | 6.22E-01 | 4.29E-01 | 1.11    | 5.89E-01 | 4.44E-01  | 1.55E+05 | 1.72E+05 |
| 2.12E+05 | 1.36E+05 | 1.91E+05 | 3.52E+05 | 5.50E+05 | 1.19E+05 | 0.85             | 1.18E+00 | 6.40E-01 | 1.11    | 1.24E+00 | 7.14E-01  | 1.55E+05 | 1.71E+05 |
| 1.60E+05 | 8.48E+04 | 1.22E+05 | 1.86E+05 | 1.08E+05 | 1.56E+05 | 0.90             | 6.34E-01 | 5.54E-01 | 1.11    | 9.45E-01 | 6.38E-01  | 8.54E+04 | 9.44E+04 |
| 1.09E+05 | 8.51E+04 | 7.73E+04 | 2.16E+05 | 9.45E+04 | 8.41E+04 | 0.83             | 8.89E-01 | 5.01E-01 | 1.10    | 9.62E-01 | 6.45E-01  | 6.86E+04 | 7.58E+04 |
| 4.38E+04 | 6.83E+04 | 6.17E+04 | 1.26E+05 | 1.39E+05 | 6.68E+04 | 0.85             | 9.22E-01 | 5.66E-01 | 1.10    | 9.08E-01 | 6.25E-01  | 5.36E+04 | 5.92E+04 |
| 4.85E+04 | 4.18E+04 | 5.08E+04 | 9.84E+04 | 1.20E+05 | 5.34E+04 | 0.86             | 9.33E-01 | 5.81E-01 | 1.10    | 9.33E-01 | 6.37E-01  | 4.31E+04 | 4.75E+04 |
| 4.20E+05 | 4.33E+05 | 6.85E+05 | 8.02E+05 | 8.00E+05 | 4.62E+05 | 0.85             | 6.89E-01 | 4.60E-01 | 1.10    | 7.67E-01 | 5.75E-01  | 4.21E+05 | 4.65E+05 |
| 1.56E+05 | 1.33E+05 | 1.60E+05 | 4.29E+05 | 2.79E+05 | 1.36E+05 | 0.81             | 1.06E+00 | 5.38E-01 | 1.10    | 1.17E+00 | 7.06E-01  | 1.34E+05 | 1.47E+05 |
| 3.43E+05 | 4.23E+05 | 4.95E+05 | 6.57E+05 | 5.89E+05 | 5.23E+05 | 0.86             | 6.35E-01 | 4.29E-01 | 1.10    | 5.89E-01 | 4.70E-01  | 3.18E+05 | 3.51E+05 |
| 9.47E+04 | 1.45E+05 | 1.42E+05 | 2.01E+05 | 2.36E+05 | 1.81E+05 | 0.86             | 7.86E-01 | 5.29E-01 | 1.10    | 7.90E-01 | 5.87E-01  | 1.05E+05 | 1.15E+05 |
| 1.28E+05 | 1.30E+05 | 1.45E+05 | 2.07E+05 | 1.62E+05 | 1.52E+05 | 0.84             | 6.37E-01 | 3.94E-01 | 1.10    | 6.28E-01 | 5.06E-01  | 9.58E+04 | 1.05E+05 |
| 1.05E+05 | 6.76E+04 | 1.44E+05 | 9.70E+04 | 1.65E+05 | 1.23E+05 | 0.93             | 1.23E+00 | 8.20E-01 | 1.10    | 1.55E+00 | 7.87E-01  | 9.17E+04 | 1.01E+05 |
| 2.89E+05 | 4.16E+05 | 3.15E+05 | 6.47E+05 | 5.05E+05 | 4.50E+05 | 0.85             | 8.76E-01 | 5.32E-01 | 1.10    | 9.22E-01 | 6.47E-01  | 3.04E+05 | 3.35E+05 |
| 1.12E+05 | 1.64E+05 | 1.66E+05 | 3.36E+05 | 3.52E+05 | 3.18E+05 | 0.87             | 8.71E-01 | 5.78E-01 | 1.10    | 8.81E-01 | 6.33E-01  | 1.48E+05 | 1.63E+05 |
| 2.83E+05 | 3.14E+05 | 3.32E+05 | 5.03E+05 | 4.42E+05 | 3.75E+05 | 0.82             | 6.02E-01 | 3.43E-01 | 1.10    | 5.24E-01 | 4.59E-01  | 2.49E+05 | 2.73E+05 |
| 1.44E+05 | 1.44E+05 | 1.99E+05 | 2.38E+05 | 1.84E+05 | 1.77E+05 | 0.84             | 6.66E-01 | 4.05E-01 | 1.10    | 7.28E-01 | 5.68E-01  | 1.35E+05 | 1.49E+05 |
| 1.80E+05 | 1.64E+05 | 2.14E+05 | 3.95E+05 | 3.63E+05 | 3.56E+05 | 0.84             | 1.05E+00 | 6.05E-01 | 1.10    | 1.14E+00 | 7.19E-01  | 1.80E+05 | 1.98E+05 |
| 2.22E+05 | 1.35E+05 | 3.29E+05 | 5.75E+05 | 5.38E+05 | 3.48E+05 | 0.88             | 1.03E+00 | 6.60E-01 | 1.10    | 1.15E+00 | 7.24E-01  | 1.93E+05 | 2.12E+05 |
| 6.81E+04 | 1.07E+05 | 8.79E+04 | 1.35E+05 | 1.18E+05 | 1.99E+05 | 0.89             | 6.52E-01 | 5.41E-01 | 1.10    | 7.09E-01 | 5.69E-01  | 7.63E+04 | 8.36E+04 |
| 1.97E+05 | 2.73E+05 | 4.01E+05 | 4.79E+05 | 3.82E+05 | 3.90E+05 | 0.85             | 7.74E-01 | 4.98E-01 | 1.10    | 7.83E-01 | 6.08E-01  | 2.34E+05 | 2.57E+05 |
| 8.53E+05 | 1.65E+06 | 1.74E+06 | 2.25E+06 | 2.25E+06 | 2.73E+06 | 0.85             | 6.35E-01 | 3.80E-01 | 1.10    | 5.90E-01 | 4.95E-01  | 1.29E+06 | 1.42E+06 |
| 5.55E+04 | 1.10E+05 | 1.08E+05 | 1.43E+05 | 2.26E+05 | 1.31E+05 | 0.86             | 7.65E-01 | 5.05E-01 | 1.10    | 7.67E-01 | 6.00E-01  | 8.55E+04 | 9.37E+04 |
| 1.22E+05 | 1.76E+05 | 1.75E+05 | 2.94E+05 | 2.87E+05 | 1.83E+05 | 0.87             | 5.66E-01 | 3.76E-01 | 1.09    | 5.24E-01 | 4.54E-01  | 1.30E+05 | 1.42E+05 |
| 6.71E+04 | 6.97E+04 | 8.49E+04 | 9.54E+04 | 1.37E+05 | 8.38E+04 | 0.83             | 1.04E+00 | 5.60E-01 | 1.09    | 1.18E+00 | 7.38E-01  | 6.04E+04 | 6.60E+04 |
| 7.81E+04 | 1.11E+05 | 1.23E+05 | 1.22E+05 | 1.33E+05 | 8.49E+04 | 0.81             | 8.36E-01 | 4.99E-01 | 1.09    | 9.81E-01 | 7.08E-01  | 7.81E+04 | 8.54E+04 |
| 7.54E+04 | 8.12E+04 | 7.94E+04 | 1.52E+05 | 1.30E+05 | 1.19E+05 | 0.85             | 8.45E-01 | 5.39E-01 | 1.09    | 9.11E-01 | 6.78E-01  | 7.54E+04 | 8.24E+04 |

14 Supplemental Table S2

| Accession # | Protein                                                              | # of Pep | PEPTIDE                               | Modification                                                           | XCorr | Charge | m/z [Da] |
|-------------|----------------------------------------------------------------------|----------|---------------------------------------|------------------------------------------------------------------------|-------|--------|----------|
| 568918452   | Adipocyte plasma membrane-associated protein                         | 1        | AGPNGTLFVVDAYK                        | Deamidated(4)                                                          | 3.49  | 2      | 726.9    |
| 32484983    | Ephrin type-A receptor 2                                             | 1        | TSVTVSDLEPHMNYTFAVEAR                 | Deamidated(13)Oxidation(12)                                            | 4.89  | 3      | 795.4    |
| 153791389   | Integrin alpha-1                                                     | 13       | VVYVAVNQTR                            | Deamidated(7)                                                          | 2.82  | 2      | 607.3    |
| 755537649   | Platelet endothelial cell adhesion molecule                          | 8        | EETVLSQYQNFSK                         | Deamidated(10)                                                         | 4.15  | 2      | 787.4    |
| 6680502     | Integral membrane protein 2B                                         | 1        | CYVIPLNTSIVMPPK                       | Carbamidomethyl(1)Deamidated(7)Oxidation(12)                           | 2.79  | 2      | 875.0    |
| 568930638   | Basement membrane-specific heparan sulfate proteoglycan core protein | 8        | SLTQGSILVGNLAPVNGTSQ GK               | Deamidated(16)                                                         | 4.63  | 3      | 715.1    |
| 117320545   | CD180 antigen                                                        | 2        | VLNLSHSLDISSEQLFDGLPALQHLNLQGNHFPK    | Deamidated(3)                                                          | 4.3   | 4      | 974.8    |
| 755532856   | Laminin, alpha 2                                                     | 17       | KADILDVVGILYVGGLPINYTTR               | Deamidated(19)                                                         | 6.31  | 3      | 831.1    |
| 568915917   | Tyrosine-protein phosphatase non-receptor type substrate 1           | 5        | GIANLSNFIR                            | Deamidated(4)                                                          | 2.71  | 2      | 553.3    |
| 20137008    | Biglycan                                                             | 2        | LLQVVYLHSHNNITK                       | Deamidated(11)                                                         | 3.71  | 3      | 548.3    |
| 67514549    | Beta-N-acetylhexosaminidase                                          | 1        | SAEGTFFINK                            | Deamidated(9)                                                          | 2.67  | 2      | 557.8    |
| 569003077   | Cadherin-2                                                           | 6        | FLEAGIYEVPIITDSGNPPKSNISILR           | Deamidated(23)                                                         | 6.58  | 3      | 1019.9   |
| 755529709   | Sodium/potassium-transporting ATPase subunit                         | 2        | LVEDLESFLKPYSVEEQKNLTSCPDGAPFIQHGPDYR | Carbamidomethyl(23)Deamidated(19)                                      | 8.12  | 4      | 1070.8   |
| 153791389   | Integrin alpha-1                                                     | 13       | LDLPVNTSIPNVTEIK                      | Deamidated(6)                                                          | 3.57  | 2      | 877.5    |
| 254281189   | Tetraspanin 3                                                        | 1        | TYNGTNSDAASR                          | Deamidated(3)                                                          | 2.69  | 2      | 629.3    |
| 9845246     | Cathepsin F                                                          | 1        | VYINDSVLSR                            | Deamidated(4)                                                          | 3.1   | 2      | 648.3    |
| 20330802    | Serotransferrin                                                      | 2        | FDEFFSQGCAPGYEKNSTLCDLCIGPLK          | Carbamidomethyl(9)Carbamidomethyl(20)Carbamidomethyl(23)Deamidated(16) | 3.87  | 3      | 1085.5   |
| 568922760   | Immunoglobulin superfamily member 10                                 | 6        | LDIVSRPPLINGLYANK                     | Deamidated(11)Deamidated(16)                                           | 5.06  | 3      | 629.0    |
| 31543108    | Lysosome-associated membrane glycoprotein 2                          | 4        | VPFIFNINPATTNFTGSCQPQSAQLR            | Carbamidomethyl(18)Deamidated(13)                                      | 6.88  | 3      | 970.5    |
| 568939694   | Serum paraoxonase/arylesterase 2                                     | 2        | IQNILSEKPSVTTVYINNGSVLQGSSVATIYDR     | Deamidated(17)                                                         | 4.63  | 4      | 892.7    |
| 568978764   | Ectonucleoside triphosphate diphosphohydrolase 5                     | 1        | GYLTSFEMFNSTFK                        | Deamidated(10)Oxidation(8)                                             | 3.74  | 2      | 844.9    |
| 170172530   | Immunoglobulin joining chain                                         | 2        | IVVPLNNRENISDPTSPLR                   | Deamidated(10)                                                         | 3.3   | 3      | 712.4    |
| 19527130    | EMILIN-1                                                             | 7        | RLGALNNSLLLEDR                        | Deamidated(6)                                                          | 4.89  | 3      | 566.7    |
| 31542814    | Fibroleukin                                                          | 3        | VANLTVVVNSLDGK                        | Deamidated(3)                                                          | 4.2   | 2      | 715.4    |
| 110347469   | Alpha-2-macroglobulin                                                | 5        | LTNQTLGFSAFEQDIPVK                    | Deamidated(3)                                                          | 5.27  | 3      | 703.4    |
| 755530199   | Integrin alpha-11                                                    | 3        | YIASDPDDKHFFNVTDAAALK                 | Deamidated(13)                                                         | 5.14  | 4      | 600.0    |
| 568987201   | Zinc transporter ZIP14                                               | 2        | YGKNDSLTLTQLK                         | Deamidated(4)                                                          | 4.14  | 3      | 494.6    |
| 114326497   | Laminin subunit beta-1                                               | 6        | VNASTTDPNSTVEQSALTR                   | Deamidated(2)                                                          | 6.34  | 2      | 996.5    |
| 153791270   | Laminin subunit gamma-1                                              | 12       | RVNDNKTAEEALR                         | Deamidated(3)Deamidated(5)                                             | 4.15  | 3      | 529.9    |

14 Supplemental Table S2

| MH+ [Da] | RT [min] | PSM | WT-1     | WT-2     | WT-3     | WT-4     | WT-5     | WT-5-2   | WT-6     | WT-7     | WT-8     | Null-1   | Null-2   |
|----------|----------|-----|----------|----------|----------|----------|----------|----------|----------|----------|----------|----------|----------|
| 1452.7   | 47.0     | 25  | 1.77E+06 | 1.65E+06 | 2.32E+06 | 1.02E+06 | 2.95E+06 | 2.79E+06 | 1.13E+06 | 1.70E+06 | 1.20E+06 | 1.07E+06 | 1.89E+06 |
| 2384.1   | 42.5     | 3   | 1.08E+05 | 7.70E+04 | 1.21E+05 | 4.62E+04 | 1.44E+05 | 1.32E+05 | 2.02E+04 | 5.53E+04 | 3.41E+04 | 2.79E+04 | 1.44E+05 |
| 1213.6   | 31.2     | 15  | 9.01E+05 | 1.05E+06 | 1.26E+06 | 5.37E+05 | 1.65E+06 | 1.52E+06 | 7.37E+05 | 7.53E+05 | 6.76E+05 | 4.75E+05 | 8.55E+05 |
| 1573.7   | 40.4     | 28  | 9.81E+05 | 9.46E+05 | 1.23E+06 | 6.24E+05 | 2.01E+06 | 1.72E+06 | 1.02E+06 | 1.00E+06 | 7.06E+05 | 6.06E+05 | 1.30E+06 |
| 1748.9   | 51.3     | 1   | 1.40E+05 | 1.58E+05 | 2.80E+05 | 8.83E+04 | 3.10E+05 | 2.33E+05 | 1.02E+05 | 1.18E+05 | 1.00E+05 | 7.24E+04 | 2.41E+05 |
| 2143.1   | 47.5     | 156 | 6.58E+04 | 6.82E+04 | 7.35E+04 | 3.88E+04 | 1.37E+05 | 1.04E+05 | 3.88E+04 | 1.36E+05 | 6.34E+04 | 1.06E+05 | 9.40E+04 |
| 3896.0   | 64.2     | 13  | 1.62E+05 | 1.88E+05 | 5.01E+05 | 5.05E+04 | 1.52E+05 | 1.37E+05 | 1.18E+04 | 1.43E+05 | 1.30E+04 | 4.55E+03 | 8.60E+04 |
| 2491.4   | 68.8     | 20  | 1.97E+05 | 2.72E+05 | 6.79E+05 | 1.24E+05 | 3.26E+05 | 2.52E+05 | 2.19E+05 | 2.78E+05 | 7.06E+04 | 3.40E+04 | 7.18E+04 |
| 1105.6   | 50.8     | 44  | 1.47E+06 | 1.79E+06 | 2.09E+06 | 9.25E+05 | 1.74E+06 | 1.85E+06 | 9.80E+05 | 1.43E+06 | 9.42E+05 | 5.77E+05 | 1.59E+06 |
| 1642.9   | 38.8     | 354 | 1.09E+05 | 1.20E+05 | 2.17E+05 | 1.26E+05 | 3.45E+05 | 2.73E+05 | 1.20E+05 | 1.99E+05 | 1.27E+05 | 1.47E+05 | 1.89E+05 |
| 1114.5   | 37.8     | 11  | 5.55E+05 | 4.88E+05 | 9.83E+05 | 2.34E+05 | 1.45E+06 | 1.36E+06 | 5.25E+05 | 4.66E+05 | 2.83E+05 | 3.92E+05 | 6.84E+05 |
| 3057.7   | 61.3     | 20  | 1.60E+05 | 6.15E+04 | 2.17E+05 | 1.22E+05 | 5.89E+05 | 4.85E+05 | 1.47E+04 | 1.99E+05 | 1.23E+05 | 9.40E+04 | 1.14E+05 |
| 4280.0   | 53.0     | 20  | 6.69E+05 | 1.14E+06 | 1.61E+06 | 2.97E+05 | 1.33E+06 | 1.66E+06 | 1.04E+05 | 6.96E+05 | 4.84E+05 | 2.62E+05 | 1.08E+06 |
| 1754.0   | 54.2     | 30  | 1.94E+05 | 4.06E+05 | 4.20E+05 | 1.81E+05 | 4.65E+05 | 4.22E+05 | 1.71E+05 | 2.99E+05 | 1.94E+05 | 1.26E+05 | 3.89E+05 |
| 1257.5   | 16.1     | 1   | 1.02E+05 | 4.35E+04 | 9.24E+04 | 0.00E+00 | 1.76E+05 | 3.71E+01 | 7.43E+04 | 7.08E+04 | 4.98E+04 | 4.79E+04 | 9.61E+04 |
| 1295.6   | 36.9     | 14  | 3.32E+05 | 1.64E+05 | 3.38E+05 | 1.32E+05 | 6.11E+05 | 5.61E+05 | 7.08E+04 | 4.06E+05 | 1.53E+05 | 1.13E+05 | 5.12E+05 |
| 3254.4   | 53.7     | 5   | 1.24E+05 | 4.66E+04 | 2.40E+05 | 6.19E+04 | 2.61E+05 | 3.30E+05 | 3.79E+04 | 1.03E+05 | 4.14E+04 | 4.26E+04 | 1.08E+05 |
| 1885.0   | 47.2     | 15  | 1.93E+05 | 2.43E+05 | 3.91E+05 | 2.01E+05 | 4.55E+05 | 3.91E+05 | 7.43E+04 | 2.90E+05 | 1.22E+05 | 1.64E+05 | 2.92E+05 |
| 2909.4   | 59.8     | 91  | 1.34E+06 | 2.32E+06 | 3.17E+06 | 7.44E+05 | 2.99E+06 | 2.62E+06 | 5.75E+05 | 1.75E+06 | 8.72E+05 | 6.66E+05 | 2.09E+06 |
| 3567.9   | 52.0     | 24  | 1.11E+05 | 1.38E+05 | 1.89E+05 | 7.14E+04 | 2.55E+05 | 2.00E+05 | 3.38E+04 | 1.10E+05 | 8.26E+04 | 2.55E+04 | 1.32E+05 |
| 1688.8   | 53.3     | 17  | 3.08E+05 | 2.81E+05 | 4.17E+05 | 1.95E+05 | 7.03E+05 | 6.09E+05 | 9.27E+04 | 3.42E+05 | 1.69E+05 | 2.12E+05 | 3.03E+05 |
| 2135.1   | 40.6     | 20  | 1.94E+05 | 1.07E+05 | 9.05E+04 | 1.02E+05 | 2.56E+05 | 2.16E+05 | 9.13E+04 | 1.29E+05 | 9.53E+04 | 1.26E+05 | 1.43E+05 |
| 1698.0   | 49.1     | 45  | 8.88E+05 | 1.32E+06 | 1.99E+06 | 9.19E+05 | 2.13E+06 | 2.01E+06 | 3.75E+05 | 1.42E+06 | 5.32E+05 | 8.07E+05 | 1.24E+06 |
| 1429.8   | 50.2     | 27  | 3.39E+05 | 3.75E+05 | 6.60E+05 | 3.46E+05 | 1.07E+06 | 1.01E+06 | 2.28E+05 | 6.53E+05 | 3.66E+05 | 2.99E+05 | 5.88E+05 |
| 2108.1   | 57.1     | 38  | 2.64E+05 | 5.09E+05 | 7.13E+05 | 4.17E+05 | 6.51E+05 | 5.52E+05 | 7.39E+04 | 4.73E+05 | 3.70E+05 | 1.11E+05 | 7.25E+05 |
| 2397.1   | 40.8     | 18  | 1.05E+05 | 2.04E+05 | 2.02E+05 | 7.20E+04 | 1.39E+05 | 1.53E+05 | 5.53E+04 | 1.42E+05 | 6.90E+04 | 4.31E+04 | 1.17E+05 |
| 1481.8   | 32.3     | 1   | 5.41E+05 | 6.42E+05 | 9.89E+05 | 3.73E+05 | 1.07E+06 | 1.06E+06 | 2.95E+05 | 7.08E+05 | 4.50E+05 | 3.27E+05 | 8.72E+05 |
| 1992.0   | 30.9     | 132 | 3.02E+06 | 3.12E+06 | 5.24E+06 | 2.79E+06 | 6.78E+06 | 5.89E+06 | 3.69E+06 | 2.59E+06 | 2.18E+06 | 2.26E+06 | 3.81E+06 |
| 1587.8   | 21.1     | 16  | 2.75E+05 | 1.01E+05 | 2.74E+05 | 3.47E+02 | 5.18E+05 | 4.19E+05 | 1.09E+05 | 1.59E+05 | 1.01E+05 | 1.46E+05 | 1.48E+05 |

14 Supplemental Table S2



| Null-3   | Null-4   | Null-5   | Null-6   | Null-7   | Null-8   | Ratio<br>Null/WT | SD       | p value  | N Ratio | N SD     | N p value | Avg_WT   | Avg_Null |
|----------|----------|----------|----------|----------|----------|------------------|----------|----------|---------|----------|-----------|----------|----------|
| 1.20E+06 | 1.31E+06 | 1.49E+06 | 2.14E+06 | 1.97E+06 | 1.37E+06 | 0.85             | 5.41E-01 | 3.21E-01 | 1.09    | 4.96E-01 | 4.40E-01  | 1.06E+06 | 1.15E+06 |
| 3.10E+04 | 5.58E+04 | 4.84E+04 | 6.78E+04 | 9.09E+04 | 8.57E+04 | 0.84             | 9.31E-01 | 5.28E-01 | 1.09    | 1.00E+00 | 7.06E-01  | 4.56E+04 | 4.98E+04 |
| 6.11E+05 | 6.74E+05 | 9.73E+05 | 1.14E+06 | 1.01E+06 | 1.12E+06 | 0.85             | 5.73E-01 | 3.47E-01 | 1.09    | 5.12E-01 | 4.55E-01  | 5.78E+05 | 6.31E+05 |
| 7.18E+05 | 8.97E+05 | 9.57E+05 | 1.20E+06 | 1.06E+06 | 8.56E+05 | 0.83             | 5.38E-01 | 2.95E-01 | 1.09    | 4.98E-01 | 4.50E-01  | 6.49E+05 | 7.07E+05 |
| 1.13E+05 | 1.10E+05 | 9.00E+04 | 2.06E+05 | 1.59E+05 | 1.46E+05 | 0.84             | 7.54E-01 | 4.39E-01 | 1.09    | 7.51E-01 | 6.19E-01  | 9.57E+04 | 1.04E+05 |
| 7.07E+04 | 5.32E+04 | 6.75E+04 | 3.30E+04 | 4.99E+04 | 6.27E+04 | 0.83             | 6.75E-01 | 3.81E-01 | 1.09    | 1.07E+00 | 7.27E-01  | 4.84E+04 | 5.26E+04 |
| 3.91E+04 | 3.88E+04 | 1.18E+05 | 3.60E+05 | 2.29E+05 | 1.84E+05 | 0.88             | 1.65E+00 | 7.79E-01 | 1.09    | 1.91E+00 | 8.49E-01  | 8.38E+04 | 9.11E+04 |
| 1.19E+05 | 1.07E+05 | 2.84E+05 | 4.67E+05 | 4.17E+05 | 3.66E+05 | 0.87             | 1.19E+00 | 6.78E-01 | 1.09    | 1.34E+00 | 7.90E-01  | 1.51E+05 | 1.64E+05 |
| 9.71E+05 | 1.21E+06 | 1.01E+06 | 1.85E+06 | 1.46E+06 | 1.50E+06 | 0.86             | 5.35E-01 | 3.48E-01 | 1.09    | 5.44E-01 | 5.06E-01  | 8.58E+05 | 9.31E+05 |
| 1.19E+05 | 1.51E+05 | 1.02E+05 | 1.74E+05 | 1.80E+05 | 1.49E+05 | 0.83             | 5.45E-01 | 3.28E-01 | 1.09    | 5.81E-01 | 5.49E-01  | 1.05E+05 | 1.14E+05 |
| 4.64E+05 | 5.30E+05 | 5.20E+05 | 7.32E+05 | 6.13E+05 | 5.60E+05 | 0.80             | 6.67E-01 | 3.80E-01 | 1.09    | 6.51E-01 | 6.18E-01  | 3.86E+05 | 4.19E+05 |
| 1.42E+05 | 6.58E+04 | 1.31E+05 | 4.05E+05 | 4.49E+05 | 6.04E+04 | 0.83             | 1.44E+00 | 6.71E-01 | 1.08    | 1.55E+00 | 8.18E-01  | 1.20E+05 | 1.31E+05 |
| 4.50E+05 | 7.03E+05 | 5.99E+05 | 9.08E+05 | 1.02E+06 | 1.02E+06 | 0.85             | 8.86E-01 | 5.59E-01 | 1.08    | 9.17E-01 | 7.00E-01  | 5.05E+05 | 5.47E+05 |
| 2.00E+05 | 2.02E+05 | 2.34E+05 | 3.82E+05 | 2.94E+05 | 2.66E+05 | 0.86             | 6.41E-01 | 4.09E-01 | 1.08    | 6.71E-01 | 5.97E-01  | 1.77E+05 | 1.92E+05 |
| 4.43E+04 | 4.88E+04 | 7.71E+04 | 9.13E+03 | 6.48E+04 | 5.97E+04 | 0.83             | 1.04E+00 | 5.74E-01 | 1.08    | 1.20E+00 | 7.69E-01  | 3.93E+04 | 4.26E+04 |
| 1.22E+05 | 2.02E+05 | 2.42E+05 | 3.42E+05 | 2.95E+05 | 2.50E+05 | 0.84             | 9.49E-01 | 5.54E-01 | 1.08    | 1.07E+00 | 7.44E-01  | 1.75E+05 | 1.89E+05 |
| 8.77E+04 | 6.76E+04 | 8.86E+04 | 1.48E+05 | 1.24E+05 | 2.32E+05 | 0.81             | 1.07E+00 | 5.47E-01 | 1.08    | 1.16E+00 | 7.66E-01  | 7.47E+04 | 8.08E+04 |
| 1.76E+05 | 2.65E+05 | 1.22E+05 | 2.28E+05 | 2.65E+05 | 2.12E+05 | 0.82             | 6.29E-01 | 3.49E-01 | 1.08    | 6.89E-01 | 6.20E-01  | 1.49E+05 | 1.61E+05 |
| 1.15E+06 | 1.52E+06 | 1.21E+06 | 1.81E+06 | 1.81E+06 | 1.98E+06 | 0.84             | 7.28E-01 | 4.53E-01 | 1.08    | 7.46E-01 | 6.53E-01  | 1.04E+06 | 1.12E+06 |
| 9.44E+04 | 9.49E+04 | 8.20E+04 | 1.69E+05 | 1.74E+05 | 1.30E+05 | 0.85             | 8.25E-01 | 5.15E-01 | 1.08    | 8.18E-01 | 6.74E-01  | 7.52E+04 | 8.13E+04 |
| 1.71E+05 | 2.20E+05 | 2.63E+05 | 4.27E+05 | 3.36E+05 | 3.57E+05 | 0.83             | 7.28E-01 | 4.31E-01 | 1.08    | 6.85E-01 | 6.32E-01  | 1.95E+05 | 2.10E+05 |
| 3.92E+04 | 1.09E+05 | 9.20E+04 | 1.61E+05 | 6.48E+04 | 2.17E+05 | 0.84             | 7.64E-01 | 4.35E-01 | 1.08    | 8.15E-01 | 6.85E-01  | 8.16E+04 | 8.82E+04 |
| 1.01E+06 | 1.09E+06 | 6.95E+05 | 1.19E+06 | 1.11E+06 | 1.25E+06 | 0.82             | 5.74E-01 | 3.29E-01 | 1.08    | 6.21E-01 | 6.10E-01  | 7.28E+05 | 7.87E+05 |
| 2.64E+05 | 3.59E+05 | 5.28E+05 | 7.17E+05 | 5.26E+05 | 4.92E+05 | 0.84             | 7.36E-01 | 4.56E-01 | 1.08    | 7.61E-01 | 6.61E-01  | 3.22E+05 | 3.47E+05 |
| 3.53E+05 | 3.67E+05 | 2.48E+05 | 5.00E+05 | 2.87E+05 | 5.07E+05 | 0.87             | 8.01E-01 | 5.32E-01 | 1.08    | 9.38E-01 | 7.23E-01  | 2.63E+05 | 2.84E+05 |
| 5.93E+04 | 1.33E+05 | 8.60E+04 | 1.23E+05 | 1.48E+05 | 1.77E+05 | 0.87             | 7.38E-01 | 5.20E-01 | 1.08    | 8.12E-01 | 6.86E-01  | 7.44E+04 | 8.02E+04 |
| 4.40E+05 | 4.86E+05 | 4.58E+05 | 7.99E+05 | 6.33E+05 | 5.88E+05 | 0.84             | 6.43E-01 | 3.90E-01 | 1.08    | 6.57E-01 | 6.21E-01  | 3.94E+05 | 4.24E+05 |
| 2.76E+06 | 2.76E+06 | 2.62E+06 | 4.55E+06 | 3.32E+06 | 3.37E+06 | 0.81             | 5.27E-01 | 2.44E-01 | 1.08    | 4.35E-01 | 4.63E-01  | 2.20E+06 | 2.37E+06 |
| 1.62E+05 | 1.12E+05 | 1.52E+05 | 3.35E+05 | 2.20E+05 | 1.07E+05 | 0.79             | 9.56E-01 | 4.84E-01 | 1.08    | 1.05E+00 | 7.59E-01  | 1.20E+05 | 1.29E+05 |

14 Supplemental Table S2

| Accession # | Protein                                                                  | # of Pep | PEPTIDE                         | Modification                               | XCorr | Charge | m/z [Da] |
|-------------|--------------------------------------------------------------------------|----------|---------------------------------|--------------------------------------------|-------|--------|----------|
| 755532856   | Laminin, alpha 2                                                         | 17       | AVQLNETLGNQDKTAER               | Deamidated(5)Deamidated(10)                | 5.99  | 3      | 630.0    |
| 21312312    | Deoxyribonuclease-1-like 1                                               | 1        | SYSFLNSSLLGR                    | Deamidated(6)                              | 2.98  | 2      | 672.8    |
| 30089697    | ADAMTS-like protein 4                                                    | 2        | LVSGNLTDNR                      | Deamidated(5)                              | 2.41  | 2      | 488.3    |
| 46560582    | EGF-receptor                                                             | 1        | DTLSINATNIK                     | Deamidated(6)                              | 2.74  | 2      | 595.8    |
| 133778978   | Cation-independent mannose-6-phosphate receptor                          | 12       | DPSSGFVFNLSPLNDSAQGHVVLGI<br>GK | Deamidated(14)                             | 8.44  | 3      | 919.5    |
| 568948081   | Reticulocalbin-3                                                         | 2        | NATYGHYEPGEEFHDVEDAETYK         | Deamidated(1)                              | 5.58  | 4      | 676.3    |
| 31981509    | Metalloreductase STEAP4                                                  | 1        | LRNATITQALTNK                   | Deamidated(3)                              | 4.48  | 3      | 482.3    |
| 153791270   | Laminin subunit gamma-1                                                  | 12       | TLAGENQTALIEELNRK               | Deamidated(6)                              | 5.79  | 3      | 677.4    |
| 568920137   | Laminin subunit alpha-5                                                  | 15       | LNASIADLQSK                     | Deamidated(2)                              | 3.63  | 2      | 580.8    |
| 568962774   | Hyaluronidase-2                                                          | 2        | ATPNEGFFNQNITTFYYDR             | Deamidated(11)                             | 4.11  | 2      | 1150.0   |
| 161016843   | Desmoglein-2                                                             | 4        | YVQNGTYTAK                      | Deamidated(4)                              | 2.59  | 2      | 573.3    |
| 27370240    | Leucyl-cystinyl aminopeptidase                                           | 8        | EETLLYDNATSSVADR                | Deamidated(8)                              | 4.39  | 2      | 892.9    |
| 225007621   | Integrin beta-5                                                          | 1        | NFTALIPGTTVEILHGDSK             | Deamidated(1)                              | 4.69  | 3      | 672.0    |
| 568971816   | Intercellular adhesion molecule 2                                        | 6        | QFLVSNVSK                       | Deamidated(6)                              | 2.66  | 2      | 511.8    |
| 103472025   | Cleft lip and palate transmembrane protein 1                             | 1        | DYYPINESLASLPLR                 | Deamidated(6)                              | 3.65  | 2      | 876.4    |
| 22094083    | CD48 antigen                                                             | 4        | ITLEVFDVPKPSIEINK               | Deamidated(17)                             | 3.87  | 3      | 680.7    |
| 268370173   | Peroxidasin homolog                                                      | 4        | HLSNATSATHEHLEGPATNDLK          | Deamidated(4)                              | 8.92  | 4      | 586.8    |
| 755500860   | GPI transamidase component PIG-T                                         | 2        | KTYAVYDLFDTAMINNSR              | Deamidated(16)Oxidation(13)                | 4.94  | 3      | 713.7    |
| 89242146    | Niemann Pick type C1                                                     | 6        | SLAQYLHSGPPVYFVLEEGYNYSSR       | Deamidated(21)                             | 6.39  | 3      | 959.8    |
| 31542814    | Fibroleukin                                                              | 3        | LHIGNYNGTAGDALR                 | Deamidated(7)                              | 4.02  | 3      | 524.9    |
| 255522953   | Plasmalemma vesicle-associated protein                                   | 1        | ADSLYSQVVGLSASQANLSK            | Deamidated(17)                             | 5.35  | 3      | 680.3    |
| 84042523    | Lysosomal protective protein                                             | 3        | LDPPCTNTTAPSNYLNNPYVR           | Carbamidomethyl(5)Deamidated(7)            | 5.4   | 3      | 803.4    |
| 568947434   | Aminopeptidase N                                                         | 9        | VILRPYLTPNNQGLYIFQGNSTVR        | Deamidated(10)Deamidated(11)Deamidated(20) | 6.53  | 4      | 691.9    |
| 568920137   | Laminin subunit alpha-5                                                  | 15       | EALNQAVNTTR                     | Deamidated(8)                              | 4.06  | 2      | 630.8    |
| 74271806    | Selenoprotein P                                                          | 1        | LESQGYFNISYIVVNHQGPSQLK         | Deamidated(8)                              | 6.5   | 3      | 903.8    |
| 568911646   | Transforming growth factor beta-2                                        | 1        | LTSPPEDYPEPDEVPEVISIYNSTR       | Deamidated(23)                             | 4.13  | 3      | 982.5    |
| 282398108   | Dolichyl-diphosphooligosaccharide--protein glycosyltransferase subunit 1 | 1        | DEIGNVSTSHLLILDDSVEMEIRPR       | Deamidated(5)Oxidation(20)                 | 7.88  | 4      | 714.6    |
| 6754588     | Lymphocyte antigen 86                                                    | 2        | GSSILNYSYPLCEEDQPK              | Carbamidomethyl(12)Deamidated(6)           | 4.63  | 2      | 1051.0   |
| 114326497   | Laminin subunit beta-1                                                   | 6        | RVNASTTDPNSTVEQSALTR            | Deamidated(3)                              | 5.41  | 3      | 716.7    |

14 Supplemental Table S2

| MH+ [Da] | RT [min] | PSM | WT-1     | WT-2     | WT-3     | WT-4     | WT-5     | WT-5-2   | WT-6     | WT-7     | WT-8     | Null-1   | Null-2   |
|----------|----------|-----|----------|----------|----------|----------|----------|----------|----------|----------|----------|----------|----------|
| 1887.9   | 28.4     | 26  | 1.04E+05 | 7.07E+04 | 1.25E+05 | 4.43E+04 | 1.72E+05 | 1.75E+05 | 5.01E+04 | 5.42E+04 | 4.59E+04 | 4.58E+04 | 7.66E+04 |
| 1344.7   | 52.0     | 16  | 1.89E+05 | 2.57E+05 | 3.34E+05 | 1.43E+05 | 3.31E+05 | 2.92E+05 | 1.85E+05 | 2.05E+05 | 1.23E+05 | 9.59E+04 | 2.22E+05 |
| 975.5    | 27.0     | 1   | 5.09E+05 | 3.68E+05 | 6.14E+05 | 3.70E+03 | 1.05E+06 | 7.84E+05 | 3.45E+05 | 4.59E+05 | 2.65E+05 | 2.94E+05 | 4.33E+05 |
| 1190.6   | 37.3     | 11  | 8.32E+05 | 1.14E+06 | 1.30E+06 | 4.55E+05 | 1.19E+06 | 1.05E+06 | 5.17E+05 | 7.74E+05 | 5.25E+05 | 5.22E+05 | 1.02E+06 |
| 2756.4   | 60.3     | 21  | 6.02E+05 | 1.11E+06 | 1.69E+06 | 5.25E+05 | 1.08E+06 | 1.09E+06 | 9.39E+04 | 9.50E+05 | 2.87E+05 | 1.16E+05 | 8.95E+05 |
| 2702.1   | 36.3     | 24  | 3.52E+05 | 3.59E+05 | 5.18E+05 | 1.91E+05 | 7.02E+05 | 6.76E+05 | 2.06E+05 | 3.00E+05 | 2.15E+05 | 1.58E+05 | 2.89E+05 |
| 1444.8   | 30.3     | 26  | 2.93E+05 | 1.97E+05 | 2.83E+05 | 2.08E+05 | 4.76E+05 | 4.47E+05 | 1.83E+05 | 3.16E+05 | 2.00E+05 | 1.50E+05 | 2.27E+05 |
| 2030.0   | 38.4     | 67  | 2.55E+06 | 1.67E+06 | 3.21E+06 | 1.35E+06 | 4.88E+06 | 4.56E+06 | 1.29E+06 | 1.78E+06 | 1.30E+06 | 1.55E+06 | 2.15E+06 |
| 1160.6   | 35.7     | 33  | 2.24E+06 | 2.16E+06 | 3.58E+06 | 1.25E+06 | 4.99E+06 | 4.86E+06 | 1.83E+06 | 2.40E+06 | 1.38E+06 | 1.76E+06 | 2.63E+06 |
| 2299.0   | 54.9     | 24  | 5.24E+04 | 4.86E+04 | 1.05E+05 | 3.96E+04 | 1.47E+05 | 1.32E+05 | 1.42E+04 | 7.42E+04 | 6.09E+04 | 4.38E+04 | 8.44E+04 |
| 1145.5   | 20.6     | 8   | 4.37E+05 | 1.84E+05 | 6.46E+05 | 8.84E+02 | 1.55E+06 | 1.33E+06 | 3.99E+05 | 5.97E+05 | 3.31E+05 | 3.41E+05 | 6.24E+05 |
| 1784.8   | 39.6     | 37  | 1.44E+06 | 1.49E+06 | 2.07E+06 | 8.72E+05 | 2.38E+06 | 2.27E+06 | 1.19E+06 | 1.42E+06 | 1.23E+06 | 7.84E+05 | 1.66E+06 |
| 2014.0   | 56.5     | 17  | 1.69E+05 | 3.26E+05 | 3.40E+05 | 9.04E+04 | 2.76E+05 | 2.88E+05 | 6.06E+04 | 2.09E+05 | 9.06E+04 | 7.15E+04 | 1.85E+05 |
| 1022.6   | 34.2     | 10  | 4.77E+05 | 2.80E+05 | 5.83E+05 | 2.18E+05 | 9.06E+05 | 8.19E+05 | 3.23E+05 | 3.97E+05 | 2.84E+05 | 2.95E+05 | 4.86E+05 |
| 1751.9   | 59.9     | 54  | 1.71E+05 | 1.68E+05 | 3.29E+05 | 1.76E+05 | 4.58E+05 | 4.24E+05 | 9.37E+04 | 3.58E+05 | 1.07E+05 | 1.37E+05 | 2.84E+05 |
| 2040.1   | 50.9     | 5   | 6.48E+04 | 1.16E+05 | 1.33E+05 | 4.55E+04 | 1.12E+05 | 1.03E+05 | 3.52E+04 | 1.11E+05 | 4.17E+04 | 2.30E+04 | 1.01E+05 |
| 2344.1   | 25.3     | 23  | 1.82E+05 | 1.81E+05 | 2.34E+05 | 6.58E+03 | 3.30E+05 | 2.76E+05 | 9.25E+04 | 1.43E+05 | 6.09E+04 | 8.60E+04 | 1.43E+05 |
| 2139.0   | 47.9     | 18  | 2.15E+05 | 2.72E+05 | 4.39E+05 | 1.64E+05 | 4.21E+05 | 3.52E+05 | 9.62E+04 | 2.40E+05 | 1.25E+05 | 1.66E+05 | 2.20E+05 |
| 2877.4   | 57.8     | 8   | 1.59E+05 | 1.96E+05 | 2.82E+05 | 4.98E+04 | 1.93E+05 | 1.57E+05 | 2.98E+04 | 1.35E+05 | 4.59E+04 | 1.82E+04 | 1.02E+05 |
| 1572.8   | 32.9     | 20  | 2.00E+05 | 2.20E+05 | 3.89E+05 | 1.74E+05 | 5.99E+05 | 6.07E+05 | 2.75E+05 | 3.09E+05 | 2.14E+05 | 1.94E+05 | 2.67E+05 |
| 2039.0   | 49.4     | 35  | 4.34E+05 | 2.81E+05 | 4.20E+05 | 2.98E+05 | 7.00E+05 | 5.62E+05 | 1.69E+05 | 4.73E+05 | 2.88E+05 | 1.97E+05 | 4.10E+05 |
| 2408.1   | 44.2     | 25  | 2.96E+05 | 3.64E+05 | 2.76E+05 | 1.81E+05 | 5.51E+05 | 4.66E+05 | 2.91E+05 | 2.05E+05 | 4.85E+05 | 2.16E+05 | 2.35E+05 |
| 2764.5   | 50.6     | 97  | 6.28E+05 | 1.33E+06 | 1.81E+06 | 5.02E+05 | 1.08E+06 | 1.02E+06 | 3.45E+05 | 9.91E+05 | 5.89E+05 | 2.77E+05 | 8.53E+05 |
| 1260.6   | 35.1     | 30  | 2.30E+06 | 1.53E+06 | 2.87E+06 | 5.94E+04 | 4.65E+06 | 3.88E+06 | 1.86E+06 | 1.98E+06 | 1.03E+06 | 1.32E+06 | 2.14E+06 |
| 2709.4   | 49.6     | 17  | 5.42E+05 | 6.49E+05 | 1.18E+06 | 5.09E+05 | 1.20E+06 | 1.19E+06 | 1.95E+05 | 7.09E+05 | 3.98E+05 | 2.47E+05 | 1.13E+06 |
| 2945.4   | 57.0     | 14  | 1.97E+05 | 3.48E+05 | 4.13E+05 | 1.73E+05 | 4.62E+05 | 4.24E+05 | 7.45E+04 | 2.52E+05 | 1.15E+05 | 1.77E+05 | 2.92E+05 |
| 2855.4   | 51.5     | 98  | 5.22E+06 | 1.04E+07 | 1.07E+07 | 3.95E+06 | 1.38E+07 | 1.20E+07 | 2.61E+06 | 1.21E+07 | 4.15E+06 | 2.40E+06 | 1.14E+07 |
| 2100.9   | 47.3     | 7   | 9.45E+04 | 1.03E+05 | 1.15E+05 | 4.02E+04 | 9.21E+04 | 7.35E+04 | 6.79E+04 | 6.82E+04 | 2.69E+04 | 3.14E+04 | 5.54E+04 |
| 2148.1   | 27.5     | 40  | 6.57E+05 | 4.22E+05 | 7.17E+05 | 4.40E+05 | 1.23E+06 | 1.03E+06 | 4.85E+05 | 3.91E+05 | 3.36E+05 | 3.62E+05 | 3.58E+05 |

14 Supplemental Table S2

| Null-3   | Null-4   | Null-5   | Null-6   | Null-7   | Null-8   | Ratio<br>Null/WT | SD       | p value  | N Ratio | N SD     | N p value | Avg_WT   | Avg_Null |
|----------|----------|----------|----------|----------|----------|------------------|----------|----------|---------|----------|-----------|----------|----------|
| 7.36E+04 | 5.10E+04 | 6.41E+04 | 1.62E+05 | 8.16E+04 | 4.69E+04 | 0.80             | 8.60E-01 | 4.22E-01 | 1.08    | 9.09E-01 | 7.24E-01  | 5.18E+04 | 5.58E+04 |
| 1.52E+05 | 1.70E+05 | 1.62E+05 | 2.94E+05 | 2.33E+05 | 2.05E+05 | 0.84             | 5.50E-01 | 2.88E-01 | 1.08    | 5.00E-01 | 5.27E-01  | 1.31E+05 | 1.41E+05 |
| 2.83E+05 | 3.41E+05 | 3.63E+05 | 5.89E+05 | 5.43E+05 | 3.64E+05 | 0.82             | 7.41E-01 | 4.40E-01 | 1.08    | 7.02E-01 | 6.72E-01  | 2.76E+05 | 2.97E+05 |
| 6.65E+05 | 6.58E+05 | 5.87E+05 | 7.39E+05 | 7.34E+05 | 8.45E+05 | 0.83             | 4.87E-01 | 2.52E-01 | 1.08    | 5.21E-01 | 5.54E-01  | 5.01E+05 | 5.39E+05 |
| 4.22E+05 | 4.90E+05 | 5.64E+05 | 1.21E+06 | 1.08E+06 | 9.02E+05 | 0.86             | 9.66E-01 | 5.96E-01 | 1.07    | 1.06E+00 | 7.67E-01  | 4.70E+05 | 5.05E+05 |
| 2.19E+05 | 3.31E+05 | 3.01E+05 | 4.90E+05 | 4.28E+05 | 3.68E+05 | 0.83             | 6.90E-01 | 3.87E-01 | 1.07    | 6.38E-01 | 6.26E-01  | 2.20E+05 | 2.37E+05 |
| 1.58E+05 | 2.73E+05 | 2.89E+05 | 2.93E+05 | 2.76E+05 | 2.64E+05 | 0.83             | 5.13E-01 | 2.71E-01 | 1.07    | 5.47E-01 | 5.74E-01  | 1.67E+05 | 1.80E+05 |
| 1.71E+06 | 1.77E+06 | 1.77E+06 | 3.16E+06 | 2.21E+06 | 1.71E+06 | 0.80             | 6.55E-01 | 3.39E-01 | 1.07    | 6.40E-01 | 6.39E-01  | 1.40E+06 | 1.50E+06 |
| 1.70E+06 | 2.13E+06 | 1.92E+06 | 3.13E+06 | 2.49E+06 | 1.97E+06 | 0.81             | 5.94E-01 | 3.16E-01 | 1.07    | 5.66E-01 | 6.04E-01  | 1.54E+06 | 1.66E+06 |
| 3.85E+04 | 5.15E+04 | 6.25E+04 | 9.53E+04 | 7.91E+04 | 4.60E+04 | 0.84             | 7.78E-01 | 4.74E-01 | 1.07    | 8.16E-01 | 7.11E-01  | 4.32E+04 | 4.64E+04 |
| 3.36E+05 | 3.81E+05 | 5.84E+05 | 6.35E+05 | 6.30E+05 | 3.53E+05 | 0.80             | 9.09E-01 | 5.08E-01 | 1.07    | 9.91E-01 | 7.73E-01  | 3.37E+05 | 3.62E+05 |
| 9.21E+05 | 1.15E+06 | 1.37E+06 | 1.73E+06 | 1.75E+06 | 1.44E+06 | 0.85             | 5.09E-01 | 2.78E-01 | 1.07    | 4.76E-01 | 5.36E-01  | 9.29E+05 | 9.95E+05 |
| 9.12E+04 | 1.64E+05 | 1.23E+05 | 3.14E+05 | 3.01E+05 | 1.61E+05 | 0.86             | 8.86E-01 | 5.50E-01 | 1.07    | 9.45E-01 | 7.53E-01  | 1.18E+05 | 1.27E+05 |
| 2.96E+05 | 3.08E+05 | 4.44E+05 | 4.97E+05 | 4.96E+05 | 2.49E+05 | 0.81             | 6.40E-01 | 3.26E-01 | 1.07    | 6.51E-01 | 6.51E-01  | 2.69E+05 | 2.88E+05 |
| 2.05E+05 | 2.16E+05 | 1.73E+05 | 1.69E+05 | 1.42E+05 | 3.18E+05 | 0.81             | 7.01E-01 | 3.69E-01 | 1.07    | 8.32E-01 | 7.27E-01  | 1.44E+05 | 1.54E+05 |
| 3.57E+04 | 7.00E+04 | 4.78E+04 | 1.19E+05 | 9.39E+04 | 9.94E+04 | 0.87             | 8.00E-01 | 5.46E-01 | 1.07    | 8.88E-01 | 7.41E-01  | 4.94E+04 | 5.28E+04 |
| 1.27E+05 | 1.46E+05 | 1.00E+05 | 1.62E+05 | 1.46E+05 | 1.61E+05 | 0.80             | 6.64E-01 | 3.78E-01 | 1.07    | 6.82E-01 | 6.98E-01  | 9.34E+04 | 9.99E+04 |
| 1.68E+05 | 1.84E+05 | 1.99E+05 | 2.78E+05 | 2.56E+05 | 2.09E+05 | 0.81             | 5.46E-01 | 2.94E-01 | 1.07    | 5.09E-01 | 6.15E-01  | 1.46E+05 | 1.57E+05 |
| 8.32E+04 | 1.13E+05 | 7.71E+04 | 2.07E+05 | 1.85E+05 | 1.57E+05 | 0.85             | 9.62E-01 | 5.69E-01 | 1.07    | 1.05E+00 | 7.85E-01  | 7.87E+04 | 8.41E+04 |
| 1.32E+05 | 2.14E+05 | 3.23E+05 | 3.82E+05 | 3.36E+05 | 3.42E+05 | 0.83             | 6.76E-01 | 3.78E-01 | 1.07    | 6.56E-01 | 6.69E-01  | 1.89E+05 | 2.01E+05 |
| 2.55E+05 | 2.99E+05 | 3.50E+05 | 4.25E+05 | 4.11E+05 | 3.52E+05 | 0.84             | 5.42E-01 | 3.10E-01 | 1.07    | 5.44E-01 | 6.24E-01  | 2.34E+05 | 2.50E+05 |
| 2.35E+05 | 4.24E+05 | 2.50E+05 | 3.98E+05 | 3.41E+05 | 2.98E+05 | 0.87             | 5.55E-01 | 3.86E-01 | 1.07    | 8.40E-01 | 7.48E-01  | 2.11E+05 | 2.25E+05 |
| 4.37E+05 | 8.33E+05 | 5.61E+05 | 1.34E+06 | 1.18E+06 | 9.40E+05 | 0.87             | 8.27E-01 | 5.56E-01 | 1.07    | 8.81E-01 | 7.55E-01  | 5.42E+05 | 5.77E+05 |
| 1.44E+06 | 1.67E+06 | 1.66E+06 | 2.57E+06 | 1.75E+06 | 1.73E+06 | 0.80             | 6.77E-01 | 3.74E-01 | 1.07    | 6.82E-01 | 7.11E-01  | 1.25E+06 | 1.33E+06 |
| 4.90E+05 | 4.47E+05 | 4.92E+05 | 7.75E+05 | 6.38E+05 | 5.91E+05 | 0.82             | 7.82E-01 | 4.19E-01 | 1.07    | 8.44E-01 | 7.48E-01  | 4.15E+05 | 4.42E+05 |
| 2.30E+05 | 2.17E+05 | 1.65E+05 | 2.35E+05 | 2.46E+05 | 1.76E+05 | 0.79             | 5.75E-01 | 2.90E-01 | 1.06    | 6.76E-01 | 6.99E-01  | 1.54E+05 | 1.64E+05 |
| 4.76E+06 | 6.71E+06 | 5.22E+06 | 7.78E+06 | 9.43E+06 | 9.16E+06 | 0.85             | 7.89E-01 | 5.01E-01 | 1.06    | 8.87E-01 | 7.62E-01  | 4.84E+06 | 5.16E+06 |
| 3.84E+04 | 8.72E+04 | 5.71E+04 | 5.97E+04 | 9.12E+04 | 7.89E+04 | 0.82             | 6.03E-01 | 3.00E-01 | 1.06    | 6.72E-01 | 6.88E-01  | 4.32E+04 | 4.60E+04 |
| 4.00E+05 | 4.89E+05 | 4.51E+05 | 9.31E+05 | 6.31E+05 | 4.10E+05 | 0.80             | 6.94E-01 | 3.14E-01 | 1.06    | 6.60E-01 | 6.87E-01  | 3.52E+05 | 3.74E+05 |

14 Supplemental Table S2

| Accession # | Protein                                                              | # of Pep | PEPTIDE                             | Modification                          | XCorr | Charge | m/z [Da] |
|-------------|----------------------------------------------------------------------|----------|-------------------------------------|---------------------------------------|-------|--------|----------|
| 568945078   | Phospholipase D3                                                     | 1        | SFLLSLAALHDNHTHSDIQVK               | Deamidated(12)                        | 3.33  | 4      | 587.6    |
| 339895744   | Collagen alpha-3(VI) chain                                           | 5        | VAVVQQSTYESVDNASVPPVK               | Deamidated(14)                        | 4.9   | 3      | 740.0    |
| 755500366   | Signal peptide peptidase-like 2A                                     | 1        | IAQEGGAAALLIANNVLPSSR               | Deamidated(14)                        | 6.62  | 3      | 756.1    |
| 22094083    | CD48 antigen                                                         | 4        | KSPGYVLDLIVTPQNK                    | Deamidated(15)                        | 4.1   | 3      | 591.7    |
| 568988914   | Transmembrane protein TM9SF1                                         | 1        | IIFANVSVR                           | Deamidated(5)                         | 2.43  | 2      | 510.3    |
| 165377206   | Translocon-associated protein subunit alpha                          | 2        | DLNGNVFQDAVFNQTVTVIER               | Deamidated(13)                        | 4.66  | 3      | 794.1    |
| 236466498   | UDP-glucose:glycoprotein glucosyltransferase 1                       | 1        | GTEVNATVIGESDPIDEVQGFLFGK           | Deamidated(5)                         | 5.09  | 2      | 1312.1   |
| 6680856     | Corticosteroid-binding                                               | 2        | DLFTNQSDFADTTK                      | Deamidated(5)                         | 4.05  | 2      | 802.4    |
| 568924797   | Latrophilin-2                                                        | 1        | SLGQFLSTENATIK                      | Deamidated(10)                        | 2.8   | 2      | 755.4    |
| 133778978   | Cation-independent mannose-6-phosphate receptor                      | 12       | TQGCAVTDEQLLYSFNLTSLSTSTFK          | Carbamidomethyl(4)Deamidated(16)      | 6.19  | 3      | 971.5    |
| 6755482     | Beta-sarcoglycan                                                     | 2        | ITSNATSDLNIK                        | Deamidated(4)                         | 3.53  | 2      | 639.3    |
| 226693367   | Lysosomal alpha-glucosidase                                          | 2        | GVFITNETGQPLIGK                     | Deamidated(6)                         | 3.41  | 2      | 787.9    |
| 27370240    | Leucyl-cystinyl aminopeptidase                                       | 8        | KDSLNSSHPISSSVQSSEQIEEMFDSLSYFK     | Deamidated(5)Oxidation(23)            | 8.45  | 4      | 881.7    |
| 568959819   | Collagen 5 alpha-3                                                   | 1        | AQPANQSVLLSIYDEK                    | Deamidated(5)                         | 4.23  | 2      | 889.0    |
| 27370240    | Leucyl-cystinyl aminopeptidase                                       | 8        | DSLNSSHPISSSVQSSEQIEEMFDSLSYFK      | Deamidated(4)Oxidation(22)            | 8.23  | 3      | 1132.5   |
| 8850219     | Haptoglobin                                                          | 2        | NLFLNHSETASAK                       | Deamidated(5)                         | 3.88  | 3      | 478.2    |
| 575771903   | Inter alpha-trypsin inhibitor, heavy chain 4                         | 5        | VSGQMhMQNITFQTEASVAQQEK             | Deamidated(9)Oxidation(5)Oxidation(7) | 7.38  | 3      | 875.7    |
| 755542065   | Phospholipase D4                                                     | 1        | ELGAIYNCSNLAQDLEK                   | Carbamidomethyl(9)Deamidated(8)       | 4.57  | 2      | 1026.5   |
| 568929104   | Podocan                                                              | 1        | LSSLEYLDLSSNNLSR                    | Deamidated(13)                        | 3.81  | 2      | 906.5    |
| 89242146    | Niemann Pick type C1                                                 | 6        | NYKNPNLTISFTAER                     | Deamidated(6)                         | 3.5   | 3      | 590.3    |
| 568962774   | Hyaluronidase-2                                                      | 2        | RNPSANTFLHLNASSFR                   | Deamidated(12)                        | 4.81  | 3      | 645.0    |
| 568930638   | Basement membrane-specific heparan sulfate proteoglycan core protein | 8        | GVNVTMPSQPGVPLSSTQLQIDPALQEFQLVDLSR | Deamidated(3)Oxidation(6)             | 4.17  | 3      | 1293.3   |
| 227908803   | Nodal modulator 1                                                    | 2        | VTNSNANAAGPLIVAGYNVSGSVR            | Deamidated(18)                        | 6.67  | 3      | 778.1    |
| 755541228   | Synaptophysin-like protein                                           | 2        | GVNKNQTVTATFGYPFR                   | Deamidated(6)                         | 4.89  | 3      | 667.3    |
| 225007625   | Interleukin-6 receptor subunit beta                                  | 3        | EQTVINR                             | Deamidated(7)                         | 2.52  | 2      | 480.3    |
| 568935338   | Iduronidase                                                          | 2        | VIAQHQNLLFANSSSSMR                  | Deamidated(12)Oxidation(17)           | 3.32  | 3      | 674.0    |
| 227330580   | Platelet receptor Gi24 isoform 1                                     | 2        | HGLELASDHHGNFSITLR                  | Deamidated(12)                        | 5.42  | 4      | 502.0    |
| 568940864   | Inositol 1,4,5-trisphosphate receptor type 1                         | 1        | VETGENCTSPAPK                       | Carbamidomethyl(7)Deamidated(6)       | 3.43  | 2      | 695.8    |

| MH+ [Da] | RT [min] | PSM | WT-1     | WT-2     | WT-3     | WT-4     | WT-5     | WT-5-2   | WT-6     | WT-7     | WT-8     | Null-1   | Null-2   |
|----------|----------|-----|----------|----------|----------|----------|----------|----------|----------|----------|----------|----------|----------|
| 2347.2   | 41.6     | 4   | 1.04E+05 | 1.58E+05 | 1.95E+05 | 5.86E+04 | 1.72E+05 | 1.74E+05 | 4.33E+04 | 1.03E+05 | 7.54E+04 | 4.91E+04 | 1.50E+05 |
| 2218.1   | 38.2     | 230 | 5.03E+06 | 3.84E+06 | 8.03E+06 | 4.97E+06 | 1.24E+07 | 1.19E+07 | 3.09E+06 | 6.83E+06 | 3.04E+06 | 3.90E+06 | 6.51E+06 |
| 2266.2   | 56.6     | 65  | 6.27E+05 | 7.36E+05 | 9.84E+05 | 3.93E+05 | 1.24E+06 | 9.37E+05 | 2.39E+05 | 7.35E+05 | 3.92E+05 | 2.90E+05 | 7.59E+05 |
| 1773.0   | 45.8     | 20  | 6.89E+05 | 7.93E+05 | 1.12E+06 | 3.36E+05 | 8.55E+05 | 8.85E+05 | 3.75E+05 | 6.22E+05 | 3.45E+05 | 2.45E+05 | 7.04E+05 |
| 1019.6   | 41.0     | 1   | 4.68E+05 | 6.08E+05 | 1.04E+06 | 3.44E+05 | 9.40E+05 | 9.06E+05 | 3.07E+05 | 5.52E+05 | 2.95E+05 | 2.06E+05 | 7.03E+05 |
| 2380.2   | 64.4     | 377 | 5.96E+05 | 9.79E+05 | 4.93E+05 | 3.93E+05 | 1.17E+06 | 1.08E+06 | 1.14E+05 | 9.15E+05 | 4.03E+05 | 2.00E+05 | 8.91E+05 |
| 2623.3   | 71.1     | 32  | 9.67E+04 | 2.36E+05 | 2.67E+05 | 1.22E+05 | 3.04E+05 | 2.51E+05 | 4.11E+03 | 1.91E+05 | 4.88E+04 | 1.58E+04 | 7.83E+04 |
| 1603.7   | 45.3     | 14  | 1.16E+05 | 1.42E+05 | 9.36E+04 | 8.01E+04 | 2.60E+05 | 2.78E+05 | 9.23E+04 | 9.45E+04 | 9.22E+04 | 4.21E+04 | 9.95E+04 |
| 1509.8   | 45.0     | 7   | 1.21E+05 | 8.31E+04 | 1.50E+05 | 2.73E+04 | 1.99E+05 | 2.33E+05 | 5.62E+04 | 9.03E+04 | 6.85E+04 | 5.14E+04 | 1.16E+05 |
| 2912.4   | 64.3     | 17  | 6.51E+05 | 1.12E+06 | 1.89E+06 | 6.54E+05 | 1.83E+06 | 1.95E+06 | 1.68E+05 | 1.19E+06 | 3.98E+05 | 4.51E+05 | 1.45E+06 |
| 1277.7   | 30.7     | 48  | 2.08E+05 | 1.73E+05 | 3.12E+05 | 6.72E+04 | 4.92E+05 | 3.13E+05 | 1.98E+05 | 2.35E+05 | 1.50E+05 | 1.42E+05 | 2.67E+05 |
| 1574.8   | 45.6     | 16  | 3.57E+05 | 2.81E+05 | 3.78E+05 | 1.61E+05 | 5.41E+05 | 4.96E+05 | 1.56E+05 | 2.92E+05 | 2.09E+05 | 2.04E+05 | 2.57E+05 |
| 3523.6   | 50.7     | 21  | 5.43E+05 | 5.30E+05 | 8.13E+05 | 2.24E+05 | 1.00E+06 | 1.11E+06 | 1.18E+05 | 6.38E+05 | 3.19E+05 | 2.83E+05 | 6.69E+05 |
| 1776.9   | 47.1     | 16  | 2.83E+05 | 2.96E+05 | 5.68E+05 | 3.31E+05 | 6.97E+05 | 7.34E+05 | 2.37E+05 | 3.64E+05 | 1.86E+05 | 2.84E+05 | 4.39E+05 |
| 3395.5   | 56.8     | 34  | 4.88E+05 | 6.15E+05 | 1.07E+06 | 2.97E+05 | 1.10E+06 | 9.46E+05 | 1.55E+05 | 6.85E+05 | 4.24E+05 | 2.51E+05 | 7.37E+05 |
| 1432.7   | 29.5     | 35  | 1.48E+06 | 1.70E+06 | 2.76E+06 | 1.02E+06 | 3.98E+06 | 3.33E+06 | 1.80E+06 | 1.67E+06 | 1.23E+06 | 1.19E+06 | 1.97E+06 |
| 2625.2   | 30.5     | 130 | 3.74E+06 | 6.83E+06 | 8.82E+06 | 4.55E+06 | 1.12E+07 | 1.01E+07 | 4.81E+06 | 3.68E+06 | 6.02E+06 | 3.95E+06 | 5.46E+06 |
| 2052.0   | 53.4     | 17  | 1.23E+05 | 1.08E+05 | 1.75E+05 | 3.84E+04 | 2.23E+05 | 1.66E+05 | 3.43E+04 | 9.16E+04 | 5.74E+04 | 3.85E+04 | 1.88E+05 |
| 1811.9   | 49.9     | 10  | 6.95E+04 | 7.64E+04 | 1.16E+05 | 5.41E+04 | 1.49E+05 | 1.35E+05 | 6.93E+04 | 1.33E+05 | 4.34E+04 | 4.09E+04 | 8.54E+04 |
| 1768.9   | 37.6     | 12  | 1.38E+05 | 1.80E+05 | 1.91E+05 | 1.03E+05 | 2.57E+05 | 2.10E+05 | 5.13E+04 | 1.77E+05 | 7.64E+04 | 5.84E+04 | 1.52E+05 |
| 1933.0   | 37.1     | 14  | 1.35E+05 | 1.07E+05 | 2.28E+05 | 7.02E+04 | 3.05E+05 | 2.48E+05 | 6.35E+04 | 1.19E+05 | 9.47E+04 | 8.61E+04 | 1.68E+05 |
| 3878.0   | 66.2     | 154 | 5.17E+06 | 8.07E+06 | 1.56E+07 | 3.42E+06 | 1.56E+07 | 1.39E+07 | 9.28E+05 | 8.91E+06 | 4.20E+06 | 2.78E+06 | 1.09E+07 |
| 2332.2   | 47.1     | 47  | 3.05E+05 | 2.76E+05 | 3.58E+05 | 1.88E+05 | 7.13E+05 | 6.03E+05 | 9.35E+04 | 4.01E+05 | 1.78E+05 | 2.20E+05 | 3.56E+05 |
| 2000.0   | 41.4     | 52  | 6.02E+06 | 5.25E+06 | 9.02E+06 | 4.27E+06 | 9.72E+06 | 8.93E+06 | 3.23E+06 | 5.55E+06 | 3.69E+06 | 3.10E+06 | 6.57E+06 |
| 959.5    | 25.8     | 6   | 1.33E+05 | 1.31E+05 | 1.61E+05 | 2.74E+03 | 2.26E+05 | 1.65E+05 | 1.10E+05 | 1.15E+05 | 5.81E+04 | 4.74E+04 | 9.83E+04 |
| 2020.0   | 33.0     | 10  | 1.31E+05 | 1.25E+05 | 1.95E+05 | 8.75E+04 | 2.83E+05 | 2.87E+05 | 1.18E+05 | 1.52E+05 | 9.21E+04 | 1.06E+05 | 1.62E+05 |
| 2005.0   | 36.2     | 2   | 1.92E+05 | 2.59E+05 | 3.47E+05 | 1.31E+05 | 2.71E+05 | 2.33E+05 | 4.58E+04 | 2.60E+05 | 1.38E+05 | 3.99E+04 | 3.44E+05 |
| 1390.6   | 17.8     | 5   | 7.83E+04 | 1.00E+05 | 1.50E+05 | 0.00E+00 | 2.07E+05 | 4.26E+01 | 1.01E+05 | 1.09E+05 | 2.89E+04 | 2.67E+04 | 7.19E+04 |

14 Supplemental Table S2

| Null-3   | Null-4   | Null-5   | Null-6   | Null-7   | Null-8   | Ratio<br>Null/WT | SD       | p value  | N Ratio | N SD     | N p value | Avg_WT   | Avg_Null |
|----------|----------|----------|----------|----------|----------|------------------|----------|----------|---------|----------|-----------|----------|----------|
| 7.76E+04 | 9.11E+04 | 6.36E+04 | 1.29E+05 | 1.08E+05 | 1.38E+05 | 0.84             | 6.93E-01 | 4.05E-01 | 1.06    | 7.11E-01 | 7.17E-01  | 6.95E+04 | 7.38E+04 |
| 3.73E+06 | 4.14E+06 | 4.57E+06 | 6.34E+06 | 6.32E+06 | 6.72E+06 | 0.80             | 6.34E-01 | 3.35E-01 | 1.06    | 5.71E-01 | 6.86E-01  | 3.67E+06 | 3.90E+06 |
| 4.83E+05 | 5.05E+05 | 4.82E+05 | 8.04E+05 | 6.70E+05 | 6.17E+05 | 0.82             | 6.25E-01 | 3.41E-01 | 1.06    | 6.17E-01 | 6.88E-01  | 4.00E+05 | 4.25E+05 |
| 3.51E+05 | 5.95E+05 | 4.05E+05 | 7.80E+05 | 7.40E+05 | 6.58E+05 | 0.84             | 6.43E-01 | 3.61E-01 | 1.06    | 6.40E-01 | 6.96E-01  | 3.85E+05 | 4.08E+05 |
| 3.53E+05 | 4.09E+05 | 4.57E+05 | 6.42E+05 | 5.25E+05 | 6.88E+05 | 0.82             | 6.80E-01 | 3.60E-01 | 1.06    | 6.71E-01 | 7.12E-01  | 3.43E+05 | 3.64E+05 |
| 4.58E+05 | 4.97E+05 | 3.86E+05 | 6.92E+05 | 7.82E+05 | 7.66E+05 | 0.86             | 8.03E-01 | 5.16E-01 | 1.06    | 8.79E-01 | 7.79E-01  | 4.00E+05 | 4.24E+05 |
| 6.15E+04 | 8.86E+04 | 1.58E+05 | 2.83E+05 | 1.90E+05 | 2.67E+05 | 0.84             | 1.11E+00 | 6.03E-01 | 1.06    | 1.24E+00 | 8.45E-01  | 9.50E+04 | 1.01E+05 |
| 5.12E+04 | 1.26E+05 | 1.12E+05 | 1.63E+05 | 1.04E+05 | 2.21E+05 | 0.83             | 8.72E-01 | 4.76E-01 | 1.06    | 8.75E-01 | 7.91E-01  | 7.87E+04 | 8.31E+04 |
| 6.49E+04 | 5.88E+04 | 1.08E+05 | 1.14E+05 | 1.45E+05 | 8.61E+04 | 0.81             | 7.73E-01 | 4.19E-01 | 1.06    | 7.73E-01 | 7.66E-01  | 6.46E+04 | 6.82E+04 |
| 6.62E+05 | 8.27E+05 | 4.91E+05 | 1.21E+06 | 1.17E+06 | 8.32E+05 | 0.81             | 8.28E-01 | 4.36E-01 | 1.06    | 9.04E-01 | 7.98E-01  | 6.15E+05 | 6.49E+05 |
| 1.51E+05 | 1.46E+05 | 2.09E+05 | 2.22E+05 | 2.23E+05 | 1.82E+05 | 0.81             | 6.01E-01 | 3.15E-01 | 1.06    | 5.97E-01 | 7.07E-01  | 1.36E+05 | 1.44E+05 |
| 1.86E+05 | 2.37E+05 | 1.95E+05 | 3.61E+05 | 3.09E+05 | 3.48E+05 | 0.82             | 5.71E-01 | 2.95E-01 | 1.06    | 4.99E-01 | 6.60E-01  | 1.83E+05 | 1.93E+05 |
| 3.32E+05 | 4.20E+05 | 4.48E+05 | 6.70E+05 | 6.07E+05 | 4.20E+05 | 0.82             | 7.28E-01 | 4.07E-01 | 1.06    | 7.48E-01 | 7.66E-01  | 3.36E+05 | 3.55E+05 |
| 3.63E+05 | 2.32E+05 | 2.71E+05 | 4.07E+05 | 2.82E+05 | 2.71E+05 | 0.78             | 5.64E-01 | 2.31E-01 | 1.05    | 6.45E-01 | 7.23E-01  | 2.29E+05 | 2.42E+05 |
| 4.12E+05 | 4.48E+05 | 5.27E+05 | 6.85E+05 | 6.66E+05 | 5.22E+05 | 0.83             | 6.88E-01 | 3.97E-01 | 1.05    | 7.11E-01 | 7.54E-01  | 3.71E+05 | 3.91E+05 |
| 1.32E+06 | 1.53E+06 | 1.41E+06 | 2.49E+06 | 1.92E+06 | 1.67E+06 | 0.80             | 5.86E-01 | 2.81E-01 | 1.05    | 5.16E-01 | 6.72E-01  | 1.19E+06 | 1.25E+06 |
| 6.22E+06 | 3.18E+06 | 5.15E+06 | 7.35E+06 | 4.41E+06 | 7.44E+06 | 0.81             | 5.77E-01 | 2.72E-01 | 1.05    | 6.63E-01 | 7.36E-01  | 3.84E+06 | 4.05E+06 |
| 5.50E+04 | 8.91E+04 | 6.10E+04 | 9.84E+04 | 9.39E+04 | 1.09E+05 | 0.81             | 8.75E-01 | 4.43E-01 | 1.05    | 9.41E-01 | 8.17E-01  | 6.36E+04 | 6.69E+04 |
| 6.99E+04 | 9.89E+04 | 3.98E+04 | 7.70E+04 | 1.37E+05 | 6.98E+04 | 0.82             | 6.79E-01 | 3.48E-01 | 1.05    | 7.74E-01 | 7.77E-01  | 5.41E+04 | 5.69E+04 |
| 9.81E+04 | 8.00E+04 | 8.92E+04 | 2.04E+05 | 1.97E+05 | 1.51E+05 | 0.84             | 7.21E-01 | 4.09E-01 | 1.05    | 7.20E-01 | 7.61E-01  | 8.83E+04 | 9.29E+04 |
| 8.09E+04 | 1.02E+05 | 1.08E+05 | 1.74E+05 | 1.48E+05 | 1.06E+05 | 0.80             | 6.91E-01 | 3.49E-01 | 1.05    | 6.69E-01 | 7.73E-01  | 8.58E+04 | 8.99E+04 |
| 4.66E+06 | 5.63E+06 | 4.83E+06 | 1.05E+07 | 8.28E+06 | 7.38E+06 | 0.82             | 8.78E-01 | 4.75E-01 | 1.05    | 9.30E-01 | 8.34E-01  | 4.77E+06 | 4.99E+06 |
| 2.12E+05 | 2.01E+05 | 2.36E+05 | 3.34E+05 | 3.59E+05 | 2.98E+05 | 0.80             | 6.61E-01 | 3.56E-01 | 1.05    | 6.40E-01 | 7.87E-01  | 1.96E+05 | 2.05E+05 |
| 3.99E+06 | 4.05E+06 | 4.71E+06 | 6.67E+06 | 6.13E+06 | 4.64E+06 | 0.81             | 5.33E-01 | 2.25E-01 | 1.05    | 4.90E-01 | 7.01E-01  | 3.53E+06 | 3.69E+06 |
| 6.33E+04 | 7.74E+04 | 1.06E+05 | 1.54E+05 | 1.36E+05 | 1.15E+05 | 0.81             | 7.21E-01 | 3.78E-01 | 1.04    | 6.97E-01 | 7.92E-01  | 6.96E+04 | 7.27E+04 |
| 7.42E+04 | 1.02E+05 | 1.33E+05 | 1.88E+05 | 1.35E+05 | 1.42E+05 | 0.80             | 5.91E-01 | 2.67E-01 | 1.04    | 5.67E-01 | 7.49E-01  | 9.26E+04 | 9.67E+04 |
| 1.19E+05 | 1.19E+05 | 1.18E+05 | 2.71E+05 | 2.08E+05 | 2.10E+05 | 0.86             | 8.47E-01 | 5.28E-01 | 1.04    | 9.68E-01 | 8.54E-01  | 1.23E+05 | 1.28E+05 |
| 4.41E+04 | 6.17E+04 | 7.60E+04 | 9.63E+04 | 9.01E+04 | 9.51E+04 | 0.82             | 9.42E-01 | 5.33E-01 | 1.04    | 9.90E-01 | 8.66E-01  | 4.90E+04 | 5.11E+04 |

14 Supplemental Table S2

| Accession # | Protein                                                   | # of Pep | PEPTIDE                           | Modification                                      | XCorr | Charge | m/z [Da] |
|-------------|-----------------------------------------------------------|----------|-----------------------------------|---------------------------------------------------|-------|--------|----------|
| 568942448   | Nuclear pore membrane glycoprotein 210                    | 3        | IEAVLPAEFFEVLSQQNGSYHHIR          | Deamidated(18)                                    | 8.86  | 4      | 708.6    |
| 568942448   | Nuclear pore membrane glycoprotein 210                    | 3        | GLMVGNGSVLGVVQAVDAETGK            | Deamidated(6)Oxidation(3)                         | 5.1   | 3      | 706.7    |
| 569018891   | Angiopoietin-related protein 7                            | 2        | LFLGNYSGNVGK                      | Deamidated(5)                                     | 2.82  | 2      | 635.3    |
| 45429999    | Toll-like receptor 13                                     | 3        | ITNLTEAISDIPR                     | Deamidated(3)                                     | 3.66  | 2      | 722.4    |
| 86439989    | Olfactomedin-like protein 3                               | 1        | IYVLDGTQNDTAFVFPR                 | Deamidated(9)                                     | 4.29  | 2      | 979.0    |
| 73661202    | Coagulation factor IX                                     | 1        | TIPHHQYNATINK                     | Deamidated(8)                                     | 3.13  | 3      | 513.3    |
| 568931034   | Endothelin-converting enzyme 1                            | 3        | LLGGGDEDAIRPQMQQILDFETALANITIPQEK | Deamidated(26)Oxidation(14)                       | 5.37  | 3      | 1214.6   |
| 225735655   | prosaposin                                                | 7        | LVLYLEHNLEKNSTKEEILAALEK          | Deamidated(12)                                    | 5.94  | 4      | 700.4    |
| 568967234   | Membralin                                                 | 1        | VFKPQSGADALNDSQDFPFPAK            | Deamidated(12)                                    | 5.89  | 3      | 903.1    |
| 153791389   | Integrin alpha-1                                          | 13       | QTQVGIVQYGANVTHEFNLNK             | Deamidated(12)                                    | 6.44  | 3      | 787.7    |
| 237874245   | Multiple epidermal growth factor-like domains protein 8   | 1        | ALLTNVSSVALGSR                    | Deamidated(5)                                     | 2.8   | 2      | 694.9    |
| 31560699    | Follistatin-related protein 1                             | 2        | GSNYSEILDK                        | Deamidated(3)                                     | 2.63  | 2      | 563.8    |
| 160333372   | Lumican                                                   | 5        | LGSFDGLVNLTFIYLQHNQLK             | Deamidated(18)                                    | 5.82  | 3      | 807.8    |
| 569018167   | Tenascin-X                                                | 2        | GPNFTSPASITFTTGLKPPQDLEAK         | Deamidated(3)                                     | 4.21  | 3      | 873.5    |
| 14916479    | Cation-dependent mannose-6-phosphate receptor             | 2        | EASNHSSGAGLVQINK                  | Deamidated(4)                                     | 4.45  | 3      | 538.3    |
| 755529709   | Sodium/potassium-transporting ATPase subunit              | 2        | EENATIATYPEFGVLDLK                | Deamidated(3)                                     | 4.85  | 2      | 1006.0   |
| 568960899   | Neuroplastin                                              | 4        | ENGVFEEISNSSGR                    | Deamidated(10)                                    | 4.04  | 2      | 763.3    |
| 568935150   | Ecto-ADP-ribosyltransferase                               | 2        | LGNFTLAYSAPETADNQR                | Deamidated(3)                                     | 4.27  | 2      | 1049.0   |
| 20330802    | Serotransferrin                                           | 2        | NSTLCDLCIGPLK                     | Carbamidomethyl(5)Carbamidomethyl(8)Deamidated(1) | 2.99  | 2      | 746.4    |
| 6755482     | Beta-sarcoglycan                                          | 2        | AENSIILNGTVMVSPTR                 | Deamidated(3)Deamidated(8)Oxidation(12)           | 5.04  | 2      | 910.0    |
| 568956330   | Neuropilin-1                                              | 2        | EGFSANYSVLQSSISEDFK               | Deamidated(6)                                     | 6.24  | 2      | 1055.0   |
| 45429999    | Toll-like receptor 13                                     | 3        | LDLTNNSIMYLDHSPR                  | Deamidated(5)Oxidation(9)                         | 3.9   | 3      | 636.0    |
| 568953122   | Insulin receptor                                          | 4        | HNLTITQGK                         | Deamidated(2)                                     | 3.24  | 2      | 506.8    |
| 226437629   | Embigin                                                   | 4        | SNVSVEENVILEKPSHVELK              | Deamidated(2)                                     | 4.14  | 3      | 751.1    |
| 568908552   | Carboxypeptidase PM20D1                                   | 2        | GALDLMLQVNMTPGHSSAPPK             | Deamidated(10)Oxidation(6)Oxidation(11)           | 4.25  | 3      | 733.0    |
| 85719313    | Carcinoembryonic antigen-related cell adhesion molecule 1 | 1        | FHVHQPVTQPFLQVTNTTVK              | Deamidated(16)                                    | 4.99  | 4      | 581.3    |
| 116734815   | Glucosylceramidase                                        | 2        | VYTYADTPNDFQLSNFSLPEEDTK          | Deamidated(15)                                    | 5.57  | 2      | 1398.1   |
| 568954529   | Protocadherin Fat 1                                       | 6        | VNTTTVNIDVSDVNDNAPLFSR            | Deamidated(2)                                     | 4.34  | 3      | 798.1    |
| 568920137   | Laminin subunit alpha-5                                   | 15       | LNTTGISFGCTADLLVGR                | Carbamidomethyl(10)Deamidated(2)                  | 4.96  | 2      | 948.5    |



| MH+ [Da] | RT [min] | PSM | WT-1     | WT-2     | WT-3     | WT-4     | WT-5     | WT-5-2   | WT-6     | WT-7     | WT-8     | Null-1   | Null-2   |
|----------|----------|-----|----------|----------|----------|----------|----------|----------|----------|----------|----------|----------|----------|
| 2831.4   | 58.0     | 17  | 2.47E+05 | 2.81E+05 | 4.75E+05 | 1.42E+05 | 6.39E+05 | 6.04E+05 | 7.37E+04 | 4.45E+05 | 1.73E+05 | 1.19E+05 | 4.46E+05 |
| 2118.1   | 56.4     | 24  | 8.81E+04 | 8.95E+04 | 1.39E+05 | 8.22E+04 | 2.22E+05 | 1.94E+05 | 3.97E+04 | 1.31E+05 | 4.06E+04 | 4.85E+04 | 1.00E+05 |
| 1269.6   | 40.4     | 10  | 7.45E+04 | 1.77E+05 | 1.75E+05 | 5.50E+04 | 1.67E+05 | 1.57E+05 | 8.78E+04 | 5.34E+04 | 2.22E+04 | 2.84E+04 | 7.92E+04 |
| 1443.8   | 49.7     | 13  | 1.93E+05 | 1.49E+05 | 2.19E+05 | 6.38E+04 | 1.84E+05 | 1.62E+05 | 9.62E+04 | 1.20E+05 | 9.76E+04 | 5.35E+04 | 1.42E+05 |
| 1957.0   | 56.5     | 39  | 4.50E+05 | 9.08E+05 | 9.31E+05 | 3.58E+05 | 1.10E+06 | 9.31E+05 | 1.86E+05 | 5.85E+05 | 3.38E+05 | 2.89E+05 | 5.66E+05 |
| 1537.8   | 18.7     | 4   | 2.22E+05 | 1.14E+05 | 4.14E+05 | 5.95E+03 | 5.88E+05 | 5.99E+05 | 2.18E+05 | 2.79E+05 | 1.29E+05 | 5.89E+04 | 1.61E+05 |
| 3641.8   | 65.8     | 33  | 1.76E+05 | 3.33E+05 | 3.78E+05 | 1.16E+05 | 3.06E+05 | 3.18E+05 | 3.45E+03 | 2.03E+05 | 1.37E+05 | 6.68E+04 | 2.00E+05 |
| 2798.5   | 47.4     | 33  | 8.06E+05 | 1.17E+06 | 1.80E+06 | 7.43E+05 | 2.32E+06 | 1.84E+06 | 1.43E+05 | 9.32E+05 | 2.41E+05 | 1.94E+05 | 8.96E+05 |
| 2707.3   | 45.1     | 16  | 4.08E+05 | 4.58E+05 | 7.64E+05 | 2.68E+05 | 7.90E+05 | 7.76E+05 | 2.30E+05 | 4.73E+05 | 3.59E+05 | 2.55E+05 | 4.71E+05 |
| 2361.2   | 46.5     | 16  | 3.22E+05 | 3.81E+05 | 5.44E+05 | 2.04E+05 | 4.90E+05 | 4.45E+05 | 1.58E+05 | 3.28E+05 | 1.99E+05 | 1.50E+05 | 3.12E+05 |
| 1388.8   | 47.1     | 9   | 9.09E+04 | 1.17E+05 | 2.03E+05 | 8.65E+04 | 2.43E+05 | 2.46E+05 | 6.29E+04 | 2.62E+05 | 1.45E+05 | 5.50E+04 | 2.99E+05 |
| 1126.5   | 32.9     | 16  | 4.20E+05 | 5.48E+05 | 8.04E+05 | 2.51E+05 | 1.19E+06 | 1.09E+06 | 5.09E+05 | 4.67E+05 | 2.52E+05 | 2.21E+05 | 4.55E+05 |
| 2421.3   | 66.2     | 97  | 1.11E+06 | 1.41E+06 | 3.43E+06 | 9.29E+05 | 2.46E+06 | 1.98E+06 | 6.74E+05 | 2.16E+06 | 5.20E+05 | 3.20E+05 | 7.33E+05 |
| 2618.3   | 49.7     | 17  | 2.58E+05 | 1.54E+05 | 4.41E+05 | 1.97E+05 | 6.68E+05 | 5.85E+05 | 1.22E+05 | 4.18E+05 | 1.78E+05 | 1.88E+05 | 3.34E+05 |
| 1612.8   | 25.9     | 50  | 2.39E+06 | 2.29E+06 | 2.58E+06 | 8.19E+04 | 2.78E+06 | 2.11E+06 | 1.97E+06 | 1.79E+06 | 1.21E+06 | 7.14E+05 | 1.71E+06 |
| 2011.0   | 58.4     | 73  | 1.99E+06 | 3.73E+06 | 4.06E+06 | 1.68E+06 | 4.12E+06 | 3.84E+06 | 1.12E+06 | 2.93E+06 | 2.03E+06 | 1.18E+06 | 3.07E+06 |
| 1525.7   | 38.1     | 32  | 3.11E+05 | 2.89E+05 | 1.71E+05 | 2.05E+05 | 4.47E+05 | 4.91E+05 | 1.84E+05 | 3.10E+05 | 1.72E+05 | 1.53E+05 | 2.73E+05 |
| 2097.0   | 37.2     | 42  | 1.04E+06 | 4.07E+05 | 1.90E+06 | 6.82E+05 | 3.02E+06 | 2.84E+06 | 6.53E+05 | 2.22E+06 | 1.25E+06 | 1.51E+06 | 1.75E+06 |
| 1491.7   | 50.2     | 2   | 1.16E+05 | 1.88E+05 | 1.98E+05 | 4.51E+04 | 3.48E+05 | 3.29E+05 | 7.71E+04 | 8.89E+04 | 1.08E+05 | 8.65E+04 | 2.61E+05 |
| 1818.9   | 42.5     | 67  | 1.68E+05 | 2.57E+05 | 6.38E+05 | 1.37E+05 | 6.87E+05 | 6.02E+05 | 1.45E+05 | 3.27E+05 | 1.78E+05 | 1.54E+05 | 4.94E+05 |
| 2109.0   | 55.7     | 40  | 3.41E+05 | 6.44E+05 | 7.22E+05 | 3.09E+05 | 8.25E+05 | 7.05E+05 | 1.91E+05 | 4.25E+05 | 3.60E+05 | 2.41E+05 | 5.55E+05 |
| 1905.9   | 42.0     | 6   | 2.51E+05 | 2.16E+05 | 2.42E+05 | 8.91E+04 | 3.07E+05 | 2.30E+05 | 1.45E+05 | 1.70E+05 | 1.16E+05 | 6.83E+04 | 1.55E+05 |
| 1012.5   | 21.0     | 5   | 1.21E+05 | 5.65E+04 | 1.72E+05 | 0.00E+00 | 2.95E+05 | 2.76E+05 | 9.58E+04 | 1.14E+05 | 7.49E+04 | 6.27E+04 | 1.11E+05 |
| 2251.2   | 35.8     | 7   | 1.17E+05 | 1.29E+05 | 1.99E+05 | 7.62E+04 | 1.57E+05 | 1.56E+05 | 5.15E+04 | 1.51E+05 | 1.14E+05 | 3.22E+04 | 1.18E+05 |
| 2197.1   | 37.2     | 1   | 3.75E+04 | 1.71E+05 | 2.62E+05 | 2.20E+04 | 1.63E+05 | 1.80E+05 | 6.04E+04 | 7.23E+04 | 6.25E+04 | 3.03E+04 | 1.98E+05 |
| 2322.2   | 38.3     | 35  | 2.90E+05 | 2.45E+05 | 5.45E+05 | 1.34E+05 | 7.88E+05 | 6.88E+05 | 1.47E+05 | 3.64E+05 | 2.68E+05 | 2.50E+05 | 4.17E+05 |
| 2795.3   | 56.6     | 36  | 3.99E+05 | 3.83E+05 | 4.46E+05 | 2.65E+05 | 4.86E+05 | 4.32E+05 | 6.95E+04 | 2.78E+05 | 1.88E+05 | 1.47E+05 | 3.29E+05 |
| 2392.2   | 51.5     | 4   | 8.15E+04 | 1.13E+05 | 1.28E+05 | 5.25E+04 | 1.84E+05 | 1.43E+05 | 4.06E+04 | 1.16E+05 | 3.34E+04 | 3.35E+04 | 1.10E+05 |
| 1896.0   | 56.7     | 19  | 1.80E+05 | 2.47E+05 | 4.35E+05 | 1.26E+05 | 6.17E+05 | 5.87E+05 | 7.50E+04 | 3.12E+05 | 1.22E+05 | 8.50E+04 | 5.13E+05 |

14 Supplemental Table S2

| Null-3   | Null-4   | Null-5   | Null-6   | Null-7   | Null-8   | Ratio<br>Null/WT | SD       | p value  | N Ratio | N SD     | N p value | Avg_WT   | Avg_Null |
|----------|----------|----------|----------|----------|----------|------------------|----------|----------|---------|----------|-----------|----------|----------|
| 1.67E+05 | 2.51E+05 | 2.11E+05 | 4.01E+05 | 3.57E+05 | 2.93E+05 | 0.82             | 8.29E-01 | 4.53E-01 | 1.04    | 8.85E-01 | 8.43E-01  | 1.96E+05 | 2.04E+05 |
| 7.14E+04 | 7.96E+04 | 8.38E+04 | 1.30E+05 | 1.29E+05 | 7.79E+04 | 0.79             | 6.87E-01 | 3.28E-01 | 1.04    | 6.92E-01 | 8.07E-01  | 6.36E+04 | 6.64E+04 |
| 4.33E+04 | 1.38E+05 | 5.87E+04 | 1.06E+05 | 9.47E+04 | 1.27E+05 | 0.78             | 8.10E-01 | 3.63E-01 | 1.04    | 9.84E-01 | 8.58E-01  | 5.91E+04 | 6.16E+04 |
| 1.44E+05 | 8.51E+04 | 9.10E+04 | 1.79E+05 | 1.06E+05 | 1.30E+05 | 0.81             | 5.76E-01 | 2.56E-01 | 1.04    | 6.62E-01 | 7.96E-01  | 8.31E+04 | 8.66E+04 |
| 5.13E+05 | 4.47E+05 | 3.88E+05 | 6.62E+05 | 5.96E+05 | 6.77E+05 | 0.80             | 6.23E-01 | 3.16E-01 | 1.04    | 6.27E-01 | 8.00E-01  | 3.67E+05 | 3.82E+05 |
| 2.63E+05 | 1.93E+05 | 1.80E+05 | 2.70E+05 | 2.00E+05 | 4.79E+05 | 0.79             | 1.00E+00 | 4.77E-01 | 1.04    | 1.10E+00 | 8.79E-01  | 1.59E+05 | 1.65E+05 |
| 1.47E+05 | 1.31E+05 | 1.42E+05 | 3.29E+05 | 2.27E+05 | 2.15E+05 | 0.83             | 8.31E-01 | 4.74E-01 | 1.04    | 8.82E-01 | 8.53E-01  | 1.27E+05 | 1.32E+05 |
| 4.83E+05 | 7.53E+05 | 6.83E+05 | 1.82E+06 | 1.13E+06 | 1.09E+06 | 0.79             | 9.70E-01 | 4.59E-01 | 1.04    | 1.06E+00 | 8.76E-01  | 6.05E+05 | 6.29E+05 |
| 2.85E+05 | 3.67E+05 | 3.92E+05 | 5.46E+05 | 5.46E+05 | 4.16E+05 | 0.81             | 5.72E-01 | 2.82E-01 | 1.04    | 5.33E-01 | 7.71E-01  | 2.91E+05 | 3.02E+05 |
| 2.53E+05 | 2.29E+05 | 2.57E+05 | 4.41E+05 | 3.44E+05 | 2.20E+05 | 0.81             | 5.84E-01 | 2.57E-01 | 1.04    | 6.01E-01 | 7.86E-01  | 1.96E+05 | 2.04E+05 |
| 1.06E+05 | 7.65E+04 | 1.37E+05 | 1.08E+05 | 1.88E+05 | 1.36E+05 | 0.85             | 8.82E-01 | 5.38E-01 | 1.04    | 1.09E+00 | 8.81E-01  | 9.75E+04 | 1.01E+05 |
| 4.09E+05 | 5.26E+05 | 3.77E+05 | 6.31E+05 | 4.91E+05 | 7.38E+05 | 0.78             | 6.92E-01 | 3.14E-01 | 1.04    | 6.67E-01 | 8.10E-01  | 3.40E+05 | 3.54E+05 |
| 5.33E+05 | 7.56E+05 | 7.14E+05 | 2.38E+06 | 2.98E+06 | 2.73E+06 | 0.86             | 1.18E+00 | 6.46E-01 | 1.04    | 1.26E+00 | 9.01E-01  | 9.24E+05 | 9.60E+05 |
| 1.71E+05 | 1.99E+05 | 1.90E+05 | 3.95E+05 | 3.84E+05 | 3.01E+05 | 0.81             | 7.59E-01 | 3.97E-01 | 1.04    | 7.52E-01 | 8.40E-01  | 1.90E+05 | 1.97E+05 |
| 1.12E+06 | 1.46E+06 | 1.52E+06 | 2.06E+06 | 2.11E+06 | 1.96E+06 | 0.83             | 6.13E-01 | 3.30E-01 | 1.04    | 5.96E-01 | 7.96E-01  | 1.12E+06 | 1.16E+06 |
| 1.91E+06 | 2.05E+06 | 2.03E+06 | 3.11E+06 | 2.90E+06 | 2.46E+06 | 0.83             | 5.73E-01 | 2.93E-01 | 1.04    | 5.97E-01 | 7.99E-01  | 1.66E+06 | 1.72E+06 |
| 1.64E+05 | 1.90E+05 | 2.22E+05 | 3.41E+05 | 2.67E+05 | 2.52E+05 | 0.81             | 5.57E-01 | 2.57E-01 | 1.04    | 5.33E-01 | 7.76E-01  | 1.66E+05 | 1.72E+05 |
| 7.35E+05 | 8.98E+05 | 1.50E+06 | 1.42E+06 | 1.55E+06 | 5.48E+05 | 0.80             | 7.83E-01 | 3.95E-01 | 1.04    | 1.00E+00 | 8.79E-01  | 9.09E+05 | 9.43E+05 |
| 8.69E+04 | 1.67E+05 | 6.96E+04 | 8.90E+04 | 8.76E+04 | 1.94E+05 | 0.78             | 9.29E-01 | 4.23E-01 | 1.04    | 1.04E+00 | 8.84E-01  | 9.35E+04 | 9.69E+04 |
| 2.22E+05 | 2.03E+05 | 2.37E+05 | 3.55E+05 | 2.57E+05 | 2.64E+05 | 0.78             | 8.19E-01 | 3.92E-01 | 1.04    | 8.94E-01 | 8.66E-01  | 1.95E+05 | 2.03E+05 |
| 3.86E+05 | 3.10E+05 | 3.45E+05 | 5.11E+05 | 4.39E+05 | 4.65E+05 | 0.81             | 5.71E-01 | 2.73E-01 | 1.04    | 5.88E-01 | 8.02E-01  | 2.91E+05 | 3.02E+05 |
| 1.76E+05 | 1.29E+05 | 1.32E+05 | 2.51E+05 | 1.79E+05 | 1.78E+05 | 0.81             | 5.59E-01 | 2.29E-01 | 1.04    | 5.77E-01 | 7.97E-01  | 1.13E+05 | 1.17E+05 |
| 7.11E+04 | 8.58E+04 | 1.26E+05 | 1.48E+05 | 1.36E+05 | 9.46E+04 | 0.78             | 8.03E-01 | 4.14E-01 | 1.04    | 8.32E-01 | 8.67E-01  | 7.46E+04 | 7.73E+04 |
| 8.64E+04 | 9.69E+04 | 7.93E+04 | 1.69E+05 | 1.35E+05 | 1.62E+05 | 0.86             | 6.58E-01 | 4.22E-01 | 1.04    | 7.41E-01 | 8.42E-01  | 7.66E+04 | 7.94E+04 |
| 5.86E+04 | 6.51E+04 | 6.15E+04 | 1.00E+05 | 8.54E+04 | 1.43E+05 | 0.81             | 1.05E+00 | 5.23E-01 | 1.03    | 1.19E+00 | 9.13E-01  | 6.50E+04 | 6.71E+04 |
| 2.96E+05 | 2.50E+05 | 2.95E+05 | 3.69E+05 | 2.82E+05 | 2.32E+05 | 0.77             | 6.37E-01 | 3.14E-01 | 1.03    | 7.26E-01 | 8.67E-01  | 2.20E+05 | 2.26E+05 |
| 2.21E+05 | 2.74E+05 | 1.82E+05 | 3.64E+05 | 2.71E+05 | 3.06E+05 | 0.80             | 5.61E-01 | 2.35E-01 | 1.03    | 5.63E-01 | 8.27E-01  | 1.88E+05 | 1.93E+05 |
| 4.52E+04 | 6.31E+04 | 8.02E+04 | 9.99E+04 | 7.52E+04 | 1.25E+05 | 0.80             | 7.27E-01 | 3.39E-01 | 1.03    | 7.68E-01 | 8.78E-01  | 5.59E+04 | 5.75E+04 |
| 1.59E+05 | 1.94E+05 | 1.48E+05 | 2.96E+05 | 2.32E+05 | 2.61E+05 | 0.79             | 9.67E-01 | 4.47E-01 | 1.03    | 1.08E+00 | 9.13E-01  | 1.67E+05 | 1.72E+05 |

14 Supplemental Table S2

| Accession # | Protein                                                     | # of Pep | PEPTIDE                                     | Modification                                             | XCorr | Charge | m/z [Da] |
|-------------|-------------------------------------------------------------|----------|---------------------------------------------|----------------------------------------------------------|-------|--------|----------|
| 568991301   | Plexin B2                                                   | 10       | GGLNLTAVTVTAENDHTVAFLGTSD<br>GR             | Deamidated(4)                                            | 7.06  | 3      | 906.5    |
| 27734847    | Junctional adhesion molecule<br>A                           | 1        | AFMNSSFTIDPK                                | Deamidated(4)Oxidation(3)                                | 3.05  | 2      | 687.8    |
| 755495449   | Immunoglobulin superfamily<br>member 8                      | 2        | GETASLLCNISVR                               | Carbamidomethyl(8)Deamidated(9)                          | 3.77  | 2      | 710.9    |
| 6857783     | low affinity immunoglobulin<br>gamma Fc region receptor II- | 3        | YHHYSSNFSIPK                                | Deamidated(7)                                            | 4.36  | 3      | 494.2    |
| 157057166   | Toll-like receptor 9                                        | 5        | NNLVTIKPEMFVNLSR                            | Deamidated(13)Oxidation(10)                              | 3.95  | 3      | 631.3    |
| 148747408   | Laminin subunit alpha-4                                     | 7        | IQINNSENTR                                  | Deamidated(4)                                            | 2.75  | 2      | 651.8    |
| 568956047   | Cadherin-5                                                  | 1        | NEDSNFTLINNHNTANITVK                        | Deamidated(10)Deamidated(11)Dea<br>midated(17)           | 5.42  | 3      | 792.7    |
| 30424948    | Transmembrane protein 62                                    | 1        | NYSNGTHTIEVFVQDSAGR                         | Deamidated(4)                                            | 4.98  | 3      | 699.3    |
| 46849812    | Fibronectin                                                 | 10       | NYTDCSTSEGR                                 | Carbamidomethyl(5)Deamidated(1)                          | 2.55  | 2      | 602.2    |
| 569018891   | Angiopoietin-related protein 7                              | 2        | AQVANLSSLLGELSR                             | Deamidated(5)                                            | 3.72  | 2      | 779.9    |
| 18087747    | Protocadherin gamma<br>subfamily C, 3                       | 2        | ETMPEYNLSITAR                               | Deamidated(7)Oxidation(3)                                | 2.7   | 2      | 771.4    |
| 568986786   | Inter-alpha-trypsin inhibitor<br>heavy chain H3             | 1        | GDEKENITAEALDSLK                            | Deamidated(6)                                            | 5.21  | 2      | 924.0    |
| 568905353   | Extracellular sulfatase                                     | 3        | LYPNASQHITPSYNYAPNMDK                       | Deamidated(4)Oxidation(19)                               | 3.59  | 3      | 814.4    |
| 225735655   | prosaposin                                                  | 7        | NSTKEELAALEK                                | Deamidated(1)                                            | 3.9   | 2      | 723.9    |
| 161016843   | Desmoglein-2                                                | 4        | SVCEDEPYVNVTAEDLDGAQNSAP<br>FSFSIIDQPPGTAQK | Carbamidomethyl(3)Deamidated(21)                         | 3.86  | 3      | 1400.0   |
| 568935150   | Ecto-ADP-ribosyltransferase<br>3                            | 2        | KGTSNDLVLQSNSTCSYYECAFLG<br>GLK             | Carbamidomethyl(16)Carbamidomet<br>hyl(21)Deamidated(13) | 5.62  | 3      | 1042.8   |
| 568922760   | Immunoglobulin superfamily<br>member 10                     | 6        | YILHENGTLVIK                                | Deamidated(6)                                            | 3.48  | 3      | 467.6    |
| 161484610   | Ectonucleoside triphosphate<br>diphosphohydrolase 2         | 1        | LLNLTSPEATAK                                | Deamidated(3)                                            | 2.76  | 2      | 629.8    |
| 52693935    | Thioredoxin domain-<br>containing protein 15                | 1        | IFIFNQTGIEAK                                | Deamidated(5)                                            | 2.87  | 2      | 691.4    |
| 165932373   | Collectin-12                                                | 4        | HTDDLTLNNTLVNIR                             | Deamidated(9)                                            | 4.95  | 2      | 914.0    |
| 6678347     | Thy-1 membrane glycoprotein                                 | 3        | DEGDYFCELQVSGANPMSSNK                       | Carbamidomethyl(7)Deamidated(20)<br>Oxidation(17)        | 5.22  | 2      | 1183.0   |
| 568956867   | CD97 antigen                                                | 2        | ISENGSSVAGILSSPNMEK                         | Deamidated(4)Oxidation(17)                               | 5.3   | 2      | 969.0    |
| 124487303   | Transmembrane protein 87B                                   | 1        | TMFNSTEIK                                   | Deamidated(4)Oxidation(2)                                | 2.55  | 2      | 544.3    |
| 568948476   | ER membrane protein<br>complex subunit 10                   | 1        | GSEVEDEDLELFNTSVQLRPPSTAP<br>GPETAAFIER     | Deamidated(13)                                           | 8.1   | 3      | 1268.3   |
| 153792704   | Plexin D1                                                   | 1        | ISLNESMQVVSRR                               | Deamidated(4)Oxidation(7)                                | 3.83  | 2      | 690.3    |
| 9625018     | Glycerophosphodiester<br>phosphodiesterase 1                | 1        | HNLTIFFDVK                                  | Deamidated(2)                                            | 3.64  | 2      | 617.8    |

| MH+ [Da] | RT [min] | PSM | WT-1     | WT-2     | WT-3     | WT-4     | WT-5     | WT-5-2   | WT-6     | WT-7     | WT-8     | Null-1   | Null-2   |
|----------|----------|-----|----------|----------|----------|----------|----------|----------|----------|----------|----------|----------|----------|
| 2717.3   | 52.7     | 19  | 3.84E+05 | 5.25E+05 | 6.25E+05 | 2.24E+05 | 7.36E+05 | 6.35E+05 | 1.21E+05 | 5.07E+05 | 2.30E+05 | 1.10E+05 | 5.33E+05 |
| 1374.6   | 38.9     | 19  | 1.71E+06 | 1.72E+06 | 2.47E+06 | 1.05E+06 | 3.14E+06 | 2.98E+06 | 1.67E+06 | 1.70E+06 | 1.18E+06 | 9.67E+05 | 2.00E+06 |
| 1420.7   | 44.1     | 5   | 1.21E+05 | 1.79E+05 | 1.85E+05 | 5.79E+04 | 1.72E+05 | 1.90E+05 | 6.91E+04 | 1.03E+05 | 7.02E+04 | 4.43E+04 | 2.18E+05 |
| 1480.7   | 27.5     | 20  | 1.31E+06 | 1.21E+06 | 1.48E+06 | 3.47E+03 | 1.60E+06 | 1.20E+06 | 1.16E+06 | 1.19E+06 | 7.67E+05 | 4.47E+05 | 9.02E+05 |
| 1892.0   | 45.6     | 16  | 2.58E+05 | 2.05E+05 | 2.77E+05 | 1.35E+05 | 2.73E+05 | 2.81E+05 | 7.33E+04 | 1.75E+05 | 8.90E+04 | 7.99E+04 | 2.27E+05 |
| 1302.7   | 28.0     | 7   | 1.65E+05 | 1.06E+05 | 1.83E+05 | 1.46E+05 | 2.80E+05 | 2.91E+05 | 1.45E+05 | 1.24E+05 | 8.97E+04 | 8.90E+04 | 1.48E+05 |
| 2376.1   | 39.6     | 41  | 1.79E+05 | 1.45E+05 | 3.34E+05 | 1.07E+05 | 4.32E+05 | 3.57E+05 | 9.94E+04 | 2.46E+05 | 1.00E+05 | 8.77E+04 | 2.12E+05 |
| 2096.0   | 42.6     | 6   | 1.39E+05 | 1.64E+05 | 1.92E+05 | 5.56E+04 | 2.42E+05 | 2.24E+05 | 6.17E+04 | 1.10E+05 | 1.09E+05 | 6.55E+04 | 1.79E+05 |
| 1203.5   | 17.7     | 18  | 1.26E+06 | 1.31E+06 | 1.90E+06 | 2.70E+02 | 2.65E+06 | 9.09E+03 | 1.04E+06 | 1.03E+06 | 2.79E+05 | 3.45E+05 | 1.18E+06 |
| 1558.8   | 61.3     | 16  | 6.53E+04 | 2.55E+05 | 2.41E+05 | 6.07E+04 | 1.87E+05 | 2.03E+05 | 4.28E+04 | 7.71E+04 | 3.37E+04 | 2.60E+04 | 1.13E+05 |
| 1541.7   | 37.3     | 13  | 5.91E+04 | 1.07E+05 | 1.24E+05 | 7.38E+04 | 1.62E+05 | 1.16E+05 | 7.83E+04 | 9.52E+04 | 5.83E+04 | 3.62E+04 | 7.77E+04 |
| 1846.9   | 45.4     | 55  | 1.63E+06 | 2.23E+06 | 2.97E+06 | 3.20E+06 | 4.00E+06 | 3.77E+06 | 2.26E+06 | 2.13E+06 | 4.19E+06 | 1.08E+06 | 2.42E+06 |
| 2441.1   | 32.8     | 2   | 9.36E+04 | 9.90E+04 | 1.11E+05 | 5.42E+04 | 1.67E+05 | 1.34E+05 | 6.91E+04 | 7.20E+04 | 5.71E+04 | 6.08E+04 | 4.98E+04 |
| 1446.8   | 42.0     | 23  | 5.58E+05 | 1.04E+06 | 1.05E+06 | 2.83E+05 | 1.59E+06 | 1.36E+06 | 5.25E+05 | 5.35E+05 | 2.44E+05 | 3.40E+05 | 5.73E+05 |
| 4197.9   | 62.3     | 4   | 3.55E+04 | 2.05E+04 | 1.28E+05 | 2.68E+04 | 2.32E+05 | 1.85E+05 | 2.27E+03 | 6.71E+04 | 3.81E+04 | 4.14E+04 | 7.24E+04 |
| 3126.5   | 59.4     | 14  | 7.66E+04 | 4.33E+04 | 2.03E+05 | 4.45E+04 | 2.12E+05 | 2.28E+05 | 1.97E+04 | 1.58E+05 | 8.38E+04 | 5.24E+04 | 1.33E+05 |
| 1400.8   | 36.1     | 13  | 1.57E+05 | 1.62E+05 | 2.96E+05 | 1.27E+05 | 3.86E+05 | 3.41E+05 | 3.85E+04 | 2.21E+05 | 8.81E+04 | 6.45E+04 | 2.19E+05 |
| 1258.7   | 37.8     | 20  | 1.66E+06 | 1.34E+06 | 1.74E+06 | 8.28E+05 | 1.80E+06 | 1.64E+06 | 1.44E+06 | 1.45E+06 | 9.29E+05 | 6.01E+05 | 1.33E+06 |
| 1381.7   | 50.2     | 15  | 2.22E+05 | 2.54E+05 | 5.03E+05 | 1.26E+05 | 6.44E+05 | 5.24E+05 | 1.07E+05 | 3.41E+05 | 1.70E+05 | 1.21E+05 | 4.21E+05 |
| 1826.9   | 45.3     | 25  | 5.96E+05 | 6.51E+05 | 7.29E+05 | 2.62E+05 | 8.23E+05 | 8.88E+05 | 2.86E+05 | 6.28E+05 | 3.37E+05 | 2.15E+05 | 4.68E+05 |
| 2365.0   | 45.9     | 20  | 1.41E+05 | 1.97E+05 | 2.06E+05 | 7.41E+04 | 2.53E+05 | 2.26E+05 | 1.42E+05 | 1.45E+05 | 6.98E+04 | 4.68E+04 | 1.39E+05 |
| 1936.9   | 39.1     | 17  | 3.03E+05 | 3.35E+05 | 4.54E+05 | 1.67E+05 | 5.91E+05 | 4.85E+05 | 1.87E+05 | 2.43E+05 | 2.00E+05 | 1.68E+05 | 2.45E+05 |
| 1087.5   | 27.4     | 4   | 2.79E+05 | 2.33E+05 | 4.03E+05 | 1.40E+05 | 5.22E+05 | 3.95E+05 | 2.80E+05 | 2.10E+05 | 1.52E+05 | 1.03E+05 | 3.14E+05 |
| 3802.8   | 57.2     | 58  | 8.26E+05 | 1.06E+06 | 1.77E+06 | 5.41E+05 | 2.04E+06 | 2.03E+06 | 1.42E+05 | 1.45E+06 | 6.56E+05 | 4.22E+05 | 1.48E+06 |
| 1379.7   | 32.3     | 16  | 1.78E+05 | 1.64E+05 | 2.58E+05 | 1.04E+05 | 2.94E+05 | 3.25E+05 | 1.37E+05 | 1.83E+05 | 1.03E+05 | 7.79E+04 | 1.92E+05 |
| 1234.6   | 47.7     | 11  | 7.61E+04 | 1.39E+05 | 1.82E+05 | 6.28E+04 | 1.92E+05 | 1.94E+05 | 3.14E+04 | 1.45E+05 | 4.92E+04 | 1.57E+04 | 1.47E+05 |

14 Supplemental Table S2

| Null-3   | Null-4   | Null-5   | Null-6   | Null-7   | Null-8   | Ratio<br>Null/WT | SD       | p value  | N Ratio | N SD     | N p value | Avg_WT   | Avg_Null |
|----------|----------|----------|----------|----------|----------|------------------|----------|----------|---------|----------|-----------|----------|----------|
| 2.49E+05 | 3.29E+05 | 2.83E+05 | 5.15E+05 | 4.29E+05 | 4.43E+05 | 0.82             | 7.22E-01 | 3.68E-01 | 1.03    | 7.63E-01 | 8.80E-01  | 2.55E+05 | 2.62E+05 |
| 1.16E+06 | 1.37E+06 | 1.54E+06 | 2.03E+06 | 1.77E+06 | 1.52E+06 | 0.79             | 4.93E-01 | 1.68E-01 | 1.03    | 4.36E-01 | 8.04E-01  | 1.12E+06 | 1.15E+06 |
| 8.08E+04 | 8.50E+04 | 7.49E+04 | 1.00E+05 | 9.39E+04 | 1.20E+05 | 0.80             | 7.49E-01 | 3.41E-01 | 1.03    | 8.45E-01 | 9.00E-01  | 7.33E+04 | 7.52E+04 |
| 5.44E+05 | 8.77E+05 | 7.40E+05 | 1.61E+06 | 1.03E+06 | 1.18E+06 | 0.83             | 6.91E-01 | 3.76E-01 | 1.03    | 7.10E-01 | 8.82E-01  | 6.50E+05 | 6.67E+05 |
| 9.17E+04 | 1.66E+05 | 1.24E+05 | 1.87E+05 | 1.69E+05 | 2.02E+05 | 0.79             | 6.01E-01 | 2.44E-01 | 1.03    | 6.06E-01 | 8.65E-01  | 1.11E+05 | 1.14E+05 |
| 1.06E+05 | 1.17E+05 | 1.13E+05 | 1.88E+05 | 1.40E+05 | 1.46E+05 | 0.77             | 5.07E-01 | 1.65E-01 | 1.02    | 4.07E-01 | 8.20E-01  | 9.50E+04 | 9.72E+04 |
| 1.13E+05 | 1.47E+05 | 2.29E+05 | 2.23E+05 | 2.23E+05 | 1.46E+05 | 0.78             | 6.91E-01 | 3.07E-01 | 1.02    | 7.47E-01 | 9.00E-01  | 1.25E+05 | 1.28E+05 |
| 8.59E+04 | 8.73E+04 | 8.45E+04 | 1.54E+05 | 1.56E+05 | 1.19E+05 | 0.81             | 6.66E-01 | 3.19E-01 | 1.02    | 6.62E-01 | 8.88E-01  | 8.34E+04 | 8.53E+04 |
| 5.49E+05 | 7.45E+05 | 6.47E+05 | 1.17E+06 | 7.74E+05 | 1.19E+06 | 0.78             | 9.60E-01 | 4.85E-01 | 1.02    | 1.03E+00 | 9.32E-01  | 5.89E+05 | 6.02E+05 |
| 4.90E+04 | 1.60E+05 | 6.51E+04 | 1.27E+05 | 1.43E+05 | 1.31E+05 | 0.79             | 9.24E-01 | 4.39E-01 | 1.02    | 1.13E+00 | 9.37E-01  | 7.20E+04 | 7.36E+04 |
| 7.47E+04 | 6.56E+04 | 6.32E+04 | 1.42E+05 | 7.33E+04 | 8.14E+04 | 0.79             | 5.84E-01 | 2.09E-01 | 1.02    | 5.91E-01 | 9.12E-01  | 5.58E+04 | 5.67E+04 |
| 3.43E+06 | 1.40E+06 | 2.37E+06 | 3.95E+06 | 2.26E+06 | 2.46E+06 | 0.83             | 5.82E-01 | 2.81E-01 | 1.01    | 9.40E-01 | 9.48E-01  | 1.79E+06 | 1.81E+06 |
| 6.06E+04 | 4.93E+04 | 1.11E+05 | 9.05E+04 | 7.77E+04 | 8.30E+04 | 0.77             | 5.30E-01 | 1.52E-01 | 1.01    | 5.80E-01 | 9.18E-01  | 5.41E+04 | 5.50E+04 |
| 3.45E+05 | 6.51E+05 | 3.93E+05 | 1.19E+06 | 8.36E+05 | 5.66E+05 | 0.77             | 8.21E-01 | 3.44E-01 | 1.01    | 8.59E-01 | 9.46E-01  | 4.39E+05 | 4.45E+05 |
| 5.02E+04 | 3.92E+04 | 5.50E+04 | 7.27E+04 | 7.54E+04 | 7.80E+04 | 0.74             | 9.32E-01 | 4.65E-01 | 1.01    | 9.88E-01 | 9.61E-01  | 4.41E+04 | 4.47E+04 |
| 5.03E+04 | 7.79E+04 | 1.22E+05 | 1.06E+05 | 1.65E+05 | 4.88E+04 | 0.79             | 9.14E-01 | 4.49E-01 | 1.01    | 1.03E+00 | 9.58E-01  | 6.86E+04 | 6.96E+04 |
| 1.03E+05 | 2.02E+05 | 9.02E+04 | 1.76E+05 | 2.26E+05 | 1.80E+05 | 0.78             | 7.66E-01 | 3.43E-01 | 1.01    | 8.15E-01 | 9.51E-01  | 1.13E+05 | 1.15E+05 |
| 7.05E+05 | 1.16E+06 | 9.74E+05 | 1.69E+06 | 1.17E+06 | 1.56E+06 | 0.81             | 4.63E-01 | 1.40E-01 | 1.01    | 4.57E-01 | 9.20E-01  | 8.32E+05 | 8.41E+05 |
| 1.86E+05 | 1.96E+05 | 2.22E+05 | 2.77E+05 | 3.01E+05 | 2.72E+05 | 0.78             | 7.51E-01 | 3.41E-01 | 1.01    | 7.84E-01 | 9.59E-01  | 1.82E+05 | 1.83E+05 |
| 3.05E+05 | 3.78E+05 | 4.14E+05 | 6.99E+05 | 6.46E+05 | 6.05E+05 | 0.81             | 6.20E-01 | 2.73E-01 | 1.01    | 5.99E-01 | 9.47E-01  | 3.35E+05 | 3.38E+05 |
| 5.54E+04 | 1.66E+05 | 1.02E+05 | 1.89E+05 | 1.93E+05 | 1.31E+05 | 0.79             | 6.61E-01 | 2.63E-01 | 1.01    | 6.76E-01 | 9.57E-01  | 9.16E+04 | 9.25E+04 |
| 2.64E+05 | 2.19E+05 | 2.10E+05 | 3.51E+05 | 2.88E+05 | 2.79E+05 | 0.77             | 5.19E-01 | 1.84E-01 | 1.01    | 4.89E-01 | 9.43E-01  | 1.87E+05 | 1.89E+05 |
| 1.67E+05 | 1.73E+05 | 1.98E+05 | 4.18E+05 | 2.14E+05 | 2.04E+05 | 0.77             | 6.75E-01 | 2.44E-01 | 1.01    | 6.49E-01 | 9.58E-01  | 1.63E+05 | 1.64E+05 |
| 6.31E+05 | 7.73E+05 | 7.73E+05 | 1.19E+06 | 1.23E+06 | 9.19E+05 | 0.79             | 7.65E-01 | 3.70E-01 | 1.01    | 8.14E-01 | 9.67E-01  | 6.72E+05 | 6.78E+05 |
| 1.17E+05 | 1.23E+05 | 1.42E+05 | 2.18E+05 | 1.85E+05 | 1.53E+05 | 0.78             | 5.60E-01 | 1.95E-01 | 1.01    | 5.21E-01 | 9.50E-01  | 1.10E+05 | 1.11E+05 |
| 7.77E+04 | 7.48E+04 | 6.38E+04 | 1.31E+05 | 1.33E+05 | 1.19E+05 | 0.80             | 8.09E-01 | 3.86E-01 | 1.01    | 8.91E-01 | 9.71E-01  | 6.79E+04 | 6.85E+04 |

14 Supplemental Table S2

| Accession # | Protein                                                    | # of Pep | PEPTIDE                                    | Modification                                          | XCorr | Charge | m/z [Da] |
|-------------|------------------------------------------------------------|----------|--------------------------------------------|-------------------------------------------------------|-------|--------|----------|
| 568915917   | Tyrosine-protein phosphatase non-receptor type substrate 1 | 5        | SVSVAAGDSTVLNCTLSLLPVGPIR                  | Carbamidomethyl(14)Deamidated(13)                     | 5.78  | 3      | 876.8    |
| 392871558   | Receptor-type tyrosine-protein phosphatase C               | 3        | SLPNNVTSFEVESLKPYK                         | Deamidated(4)Deamidated(5)                            | 5.64  | 3      | 685.0    |
| 113865977   | Lactadherin                                                | 2        | NNTIPDSQMSASSSYK                           | Deamidated(2)Oxidation(9)                             | 2.54  | 2      | 873.9    |
| 568947434   | Aminopeptidase N                                           | 9        | KLNYTLK                                    | Deamidated(3)                                         | 2.91  | 2      | 440.8    |
| 111955312   | OX-2 membrane glycoprotein                                 | 1        | GTGTGIENSTESHFHSNGTTSVTSI<br>LR            | Deamidated(8)Deamidated(17)                           | 5.84  | 3      | 931.4    |
| 254028203   | GPI inositol-deacylase                                     | 2        | HINLTTLVAGGFR                              | Deamidated(3)                                         | 4.4   | 3      | 496.3    |
| 755537649   | Platelet endothelial cell adhesion molecule                | 8        | EVTEGGVVTVNCSLQEEKPPIFFK                   | Carbamidomethyl(12)Deamidated(11)                     | 6.34  | 3      | 903.5    |
| 208609939   | Receptor-type tyrosine phosphatase                         | 2        | TNSTQVSDVR                                 | Deamidated(2)                                         | 3.53  | 2      | 554.3    |
| 110347564   | Truncated ceruloplasmin                                    | 2        | EYEGAVYPDNTTDFQR                           | Deamidated(10)                                        | 4.63  | 2      | 953.4    |
| 153792543   | ATP-binding cassette sub-family A member 9                 | 2        | VDNFNDSNYMMVFAPSEATHEIM<br>NK              | Deamidated(5)Oxidation(10)Oxidation(11)Oxidation(24)  | 6.34  | 3      | 1028.1   |
| 569000314   | Elastin microfibril interfacier 2                          | 3        | DTYVEAVLSVSNASVAQLHTAGYR                   | Deamidated(12)                                        | 7.66  | 3      | 851.4    |
| 755537649   | Platelet endothelial cell adhesion molecule                | 8        | DDAMVYNVTSR                                | Deamidated(7)Oxidation(4)                             | 2.88  | 2      | 644.3    |
| 568920137   | Laminin subunit alpha-5                                    | 15       | VFDLHQNMGSVNVSVGCTPAQLIE<br>TSR            | Carbamidomethyl(17)Deamidated(12)<br>Oxidation(8)     | 7.99  | 3      | 992.8    |
| 153791389   | Integrin alpha-1                                           | 13       | ANQIVIPHNTTFQTEPTK                         | Deamidated(9)                                         | 4.25  | 3      | 680.7    |
| 6753332     | Monocyte differentiation antigen CD14                      | 3        | LDRNPSPDELPQVGNLSLK                        | Deamidated(15)                                        | 3.6   | 3      | 698.7    |
| 227908803   | Nodal modulator 1                                          | 2        | LENITTGTytiHAQK                            | Deamidated(3)                                         | 4.06  | 3      | 564.3    |
| 755532856   | Laminin, alpha 2                                           | 17       | ICNQNSSNPYQR                               | Carbamidomethyl(2)Deamidated(5)                       | 3.44  | 2      | 741.3    |
| 568922098   | Prostaglandin F2 receptor negative regulator               | 3        | YSVLITAEKPVGDLSSPNETK                      | Deamidated(18)                                        | 4.85  | 3      | 750.4    |
| 6678347     | Thy-1 membrane glycoprotein                                | 3        | VLTLANFTTK                                 | Deamidated(6)                                         | 2.81  | 2      | 554.8    |
| 225903442   | Integrin alpha-5                                           | 6        | LSPIHIALNFSLDPK                            | Deamidated(9)                                         | 3.27  | 3      | 556.0    |
| 27369644    | Inter-alpha-trypsin inhibitor heavy chain H5               | 2        | AEGDVGPPPSTLINQNETFAK                      | Deamidated(16)                                        | 4.98  | 2      | 1093.5   |
| 568939794   | Transmembrane protein 106B                                 | 1        | LNNITNIGPLDMK                              | Deamidated(2)Deamidated(3)Oxidation(12)               | 3.71  | 2      | 730.4    |
| 121674797   | Palmitoyl-protein thioesterase 1                           | 2        | NYSIFLADINQER                              | Deamidated(1)                                         | 3.84  | 2      | 792.4    |
| 569000314   | Elastin microfibril interfacier 2                          | 3        | LGIVLQAANSSDVELTPMGALPEQ<br>PGAENEQVLMELSR | Deamidated(9)Deamidated(30)Oxidation(18)Oxidation(35) | 5.65  | 4      | 1035.0   |
| 568914609   | Protein O-mannosyl-transferase 1                           | 1        | FVHVNTSAILK                                | Deamidated(5)                                         | 4.18  | 3      | 410.6    |
| 16716463    | Mucolipin-1                                                | 1        | GHVDPANDTFDIDPR                            | Deamidated(7)                                         | 3.62  | 3      | 557.3    |

| MH+ [Da] | RT [min] | PSM | WT-1     | WT-2     | WT-3     | WT-4     | WT-5     | WT-5-2   | WT-6     | WT-7     | WT-8     | Null-1   | Null-2   |
|----------|----------|-----|----------|----------|----------|----------|----------|----------|----------|----------|----------|----------|----------|
| 2628.4   | 67.5     | 20  | 1.64E+05 | 2.94E+05 | 5.47E+05 | 1.19E+05 | 3.53E+05 | 2.77E+05 | 7.02E+04 | 2.44E+05 | 7.14E+04 | 1.97E+04 | 2.40E+05 |
| 2053.1   | 44.8     | 55  | 1.83E+05 | 2.36E+05 | 3.77E+05 | 1.31E+05 | 2.29E+05 | 2.31E+05 | 1.40E+05 | 2.01E+05 | 1.21E+05 | 6.42E+04 | 1.45E+05 |
| 1746.7   | 24.7     | 17  | 1.49E+05 | 1.64E+05 | 1.86E+05 | 0.00E+00 | 2.11E+05 | 1.91E+05 | 1.57E+05 | 1.06E+05 | 1.06E+05 | 5.40E+04 | 8.96E+04 |
| 880.5    | 25.3     | 5   | 2.06E+06 | 2.10E+06 | 2.34E+06 | 0.00E+00 | 2.25E+06 | 1.77E+06 | 1.83E+06 | 1.39E+06 | 8.75E+05 | 5.62E+05 | 1.23E+06 |
| 2792.3   | 37.3     | 37  | 1.23E+06 | 1.50E+06 | 1.95E+06 | 6.53E+05 | 2.53E+06 | 2.35E+06 | 7.07E+05 | 1.78E+06 | 8.48E+05 | 6.52E+05 | 1.63E+06 |
| 1486.8   | 45.4     | 13  | 8.93E+04 | 8.90E+04 | 1.39E+05 | 4.31E+04 | 1.39E+05 | 1.57E+05 | 5.46E+04 | 1.14E+05 | 6.91E+04 | 5.16E+04 | 1.12E+05 |
| 2708.4   | 49.2     | 19  | 2.96E+05 | 3.17E+05 | 6.02E+05 | 2.22E+05 | 7.42E+05 | 6.69E+05 | 1.32E+05 | 4.24E+05 | 2.25E+05 | 1.66E+05 | 5.03E+05 |
| 1107.5   | 19.1     | 16  | 1.42E+05 | 1.29E+05 | 1.24E+05 | 2.54E+02 | 1.70E+05 | 1.71E+04 | 1.16E+05 | 2.06E+05 | 5.82E+04 | 7.79E+04 | 1.22E+05 |
| 1905.8   | 36.7     | 23  | 5.64E+05 | 5.91E+05 | 7.19E+05 | 5.22E+05 | 9.89E+05 | 9.29E+05 | 5.40E+05 | 4.81E+05 | 4.64E+05 | 3.26E+05 | 6.25E+05 |
| 3082.3   | 42.8     | 15  | 3.32E+05 | 3.42E+05 | 4.88E+05 | 2.08E+05 | 4.95E+05 | 5.15E+05 | 2.31E+05 | 3.80E+05 | 2.25E+05 | 2.36E+05 | 1.91E+05 |
| 2552.3   | 56.0     | 20  | 1.86E+05 | 3.05E+05 | 4.46E+05 | 2.05E+05 | 5.34E+05 | 4.56E+05 | 7.71E+04 | 2.64E+05 | 1.32E+05 | 7.54E+04 | 2.65E+05 |
| 1287.6   | 29.2     | 35  | 6.90E+05 | 5.30E+05 | 7.89E+05 | 3.76E+05 | 1.19E+06 | 1.05E+06 | 6.22E+05 | 6.35E+05 | 4.01E+05 | 3.11E+05 | 6.83E+05 |
| 2976.4   | 47.4     | 38  | 6.15E+05 | 7.72E+05 | 1.47E+06 | 3.62E+05 | 2.05E+06 | 1.68E+06 | 3.12E+05 | 1.00E+06 | 4.41E+05 | 3.61E+05 | 1.26E+06 |
| 2040.0   | 35.0     | 37  | 1.26E+06 | 1.23E+06 | 1.46E+06 | 5.87E+05 | 1.50E+06 | 1.55E+06 | 8.53E+05 | 8.97E+05 | 6.97E+05 | 4.93E+05 | 9.28E+05 |
| 2094.1   | 43.6     | 16  | 6.38E+05 | 5.33E+05 | 8.29E+05 | 3.02E+05 | 7.90E+05 | 6.97E+05 | 3.78E+05 | 4.06E+05 | 4.04E+05 | 2.01E+05 | 5.38E+05 |
| 1690.9   | 31.4     | 20  | 1.11E+06 | 8.43E+05 | 1.31E+06 | 6.67E+05 | 2.04E+06 | 1.79E+06 | 6.63E+05 | 1.16E+06 | 6.74E+05 | 7.34E+05 | 8.53E+05 |
| 1481.6   | 19.9     | 17  | 6.16E+05 | 2.81E+04 | 1.15E+05 | 0.00E+00 | 1.75E+06 | 1.60E+06 | 8.52E+05 | 7.53E+04 | 6.67E+04 | 7.67E+03 | 2.43E+05 |
| 2249.2   | 39.8     | 15  | 1.54E+05 | 1.55E+05 | 1.89E+05 | 8.70E+04 | 2.69E+05 | 2.77E+05 | 1.20E+05 | 1.95E+05 | 9.35E+04 | 6.70E+04 | 1.48E+05 |
| 1108.6   | 46.5     | 34  | 7.14E+06 | 1.07E+07 | 9.87E+06 | 5.70E+06 | 1.19E+07 | 1.22E+07 | 5.76E+06 | 8.48E+06 | 4.65E+06 | 3.00E+06 | 7.33E+06 |
| 1665.9   | 53.8     | 7   | 9.48E+04 | 1.64E+05 | 2.43E+05 | 8.42E+04 | 1.49E+05 | 1.48E+05 | 4.48E+04 | 1.27E+05 | 3.23E+04 | 1.18E+04 | 6.26E+04 |
| 2186.1   | 43.0     | 15  | 6.42E+04 | 2.91E+04 | 1.35E+05 | 9.09E+04 | 9.94E+04 | 9.50E+04 | 3.64E+04 | 6.38E+04 | 2.12E+04 | 4.82E+04 | 1.91E+05 |
| 1459.7   | 40.4     | 45  | 1.81E+05 | 2.23E+05 | 5.82E+05 | 1.16E+05 | 4.70E+05 | 3.59E+05 | 2.08E+05 | 2.37E+05 | 1.67E+05 | 1.34E+05 | 2.33E+05 |
| 1583.8   | 55.6     | 23  | 5.05E+05 | 3.98E+05 | 4.63E+05 | 1.95E+05 | 7.74E+05 | 6.45E+05 | 1.79E+05 | 3.40E+05 | 1.64E+05 | 1.67E+05 | 3.83E+05 |
| 4137.0   | 61.1     | 24  | 8.43E+04 | 1.31E+05 | 3.13E+05 | 8.95E+04 | 3.35E+05 | 3.31E+05 | 2.43E+03 | 1.55E+05 | 5.40E+04 | 1.80E+04 | 1.49E+05 |
| 1229.7   | 36.4     | 5   | 6.87E+04 | 5.65E+04 | 1.09E+05 | 3.45E+04 | 1.49E+05 | 1.22E+05 | 3.69E+04 | 9.01E+04 | 3.73E+04 | 2.57E+04 | 9.02E+04 |
| 1669.7   | 34.9     | 8   | 1.33E+05 | 1.06E+05 | 1.53E+05 | 4.80E+04 | 1.78E+05 | 1.85E+05 | 7.69E+04 | 1.07E+05 | 4.80E+04 | 4.51E+04 | 1.07E+05 |

14 Supplemental Table S2

| Null-3   | Null-4   | Null-5   | Null-6   | Null-7   | Null-8   | Ratio<br>Null/WT | SD       | p value  | N Ratio | N SD     | N p value | Avg_WT   | Avg_Null |
|----------|----------|----------|----------|----------|----------|------------------|----------|----------|---------|----------|-----------|----------|----------|
| 9.37E+04 | 1.42E+05 | 1.28E+05 | 2.87E+05 | 3.02E+05 | 3.19E+05 | 0.81             | 9.87E-01 | 4.87E-01 | 1.01    | 1.07E+00 | 9.78E-01  | 1.34E+05 | 1.35E+05 |
| 1.28E+05 | 1.80E+05 | 1.32E+05 | 2.52E+05 | 1.85E+05 | 2.27E+05 | 0.80             | 5.96E-01 | 2.39E-01 | 1.01    | 6.17E-01 | 9.67E-01  | 1.19E+05 | 1.20E+05 |
| 7.53E+04 | 9.07E+04 | 1.05E+05 | 2.35E+05 | 1.75E+05 | 8.54E+04 | 0.81             | 7.92E-01 | 3.77E-01 | 1.00    | 8.20E-01 | 9.81E-01  | 8.23E+04 | 8.27E+04 |
| 7.36E+05 | 1.30E+06 | 1.09E+06 | 2.12E+06 | 1.64E+06 | 1.73E+06 | 0.80             | 6.95E-01 | 3.19E-01 | 1.00    | 6.98E-01 | 9.81E-01  | 9.40E+05 | 9.43E+05 |
| 7.99E+05 | 1.05E+06 | 1.18E+06 | 1.44E+06 | 1.44E+06 | 1.27E+06 | 0.78             | 5.87E-01 | 2.40E-01 | 1.00    | 5.95E-01 | 9.81E-01  | 8.68E+05 | 8.71E+05 |
| 6.44E+04 | 7.88E+04 | 5.41E+04 | 9.86E+04 | 8.46E+04 | 8.36E+04 | 0.79             | 5.33E-01 | 1.99E-01 | 1.00    | 5.71E-01 | 9.81E-01  | 5.81E+04 | 5.83E+04 |
| 2.50E+05 | 2.63E+05 | 2.30E+05 | 4.34E+05 | 3.78E+05 | 2.71E+05 | 0.77             | 7.03E-01 | 2.94E-01 | 1.00    | 7.29E-01 | 9.85E-01  | 2.29E+05 | 2.30E+05 |
| 5.76E+04 | 6.80E+04 | 6.13E+04 | 1.06E+05 | 7.57E+04 | 1.34E+05 | 0.82             | 7.98E-01 | 4.60E-01 | 1.00    | 9.42E-01 | 9.91E-01  | 6.49E+04 | 6.51E+04 |
| 4.76E+05 | 4.85E+05 | 4.69E+05 | 6.08E+05 | 4.72E+05 | 4.92E+05 | 0.77             | 3.74E-01 | 6.05E-02 | 1.00    | 3.58E-01 | 9.78E-01  | 3.70E+05 | 3.71E+05 |
| 1.47E+05 | 2.89E+05 | 2.50E+05 | 3.77E+05 | 4.90E+05 | 2.71E+05 | 0.79             | 5.71E-01 | 1.94E-01 | 1.00    | 5.76E-01 | 9.99E-01  | 2.07E+05 | 2.07E+05 |
| 2.62E+05 | 1.57E+05 | 1.45E+05 | 2.89E+05 | 3.17E+05 | 2.66E+05 | 0.77             | 7.13E-01 | 2.87E-01 | 1.00    | 7.56E-01 | 9.99E-01  | 1.63E+05 | 1.63E+05 |
| 4.54E+05 | 4.49E+05 | 5.39E+05 | 6.94E+05 | 6.21E+05 | 5.24E+05 | 0.77             | 4.88E-01 | 1.37E-01 | 1.00    | 4.38E-01 | 9.99E-01  | 3.97E+05 | 3.97E+05 |
| 4.61E+05 | 6.97E+05 | 6.44E+05 | 8.88E+05 | 7.64E+05 | 8.07E+05 | 0.76             | 7.78E-01 | 3.36E-01 | 1.00    | 8.28E-01 | 9.95E-01  | 5.41E+05 | 5.41E+05 |
| 6.76E+05 | 8.06E+05 | 8.81E+05 | 1.25E+06 | 9.97E+05 | 8.97E+05 | 0.78             | 4.53E-01 | 1.08E-01 | 1.00    | 4.19E-01 | 9.85E-01  | 6.42E+05 | 6.41E+05 |
| 2.70E+05 | 3.79E+05 | 3.96E+05 | 5.87E+05 | 5.97E+05 | 5.38E+05 | 0.79             | 5.48E-01 | 1.89E-01 | 1.00    | 5.06E-01 | 9.82E-01  | 3.20E+05 | 3.19E+05 |
| 6.59E+05 | 7.12E+05 | 7.98E+05 | 1.28E+06 | 1.11E+06 | 8.07E+05 | 0.76             | 5.26E-01 | 1.70E-01 | 1.00    | 4.90E-01 | 9.73E-01  | 6.50E+05 | 6.47E+05 |
| 3.37E+05 | 5.31E+05 | 3.70E+05 | 6.17E+05 | 5.04E+05 | 5.23E+05 | 0.69             | 1.19E+00 | 4.86E-01 | 0.99    | 1.60E+00 | 9.90E-01  | 2.86E+05 | 2.84E+05 |
| 7.83E+04 | 1.21E+05 | 1.17E+05 | 2.07E+05 | 1.90E+05 | 1.45E+05 | 0.79             | 6.03E-01 | 2.22E-01 | 0.99    | 5.78E-01 | 9.69E-01  | 9.83E+04 | 9.77E+04 |
| 4.17E+06 | 6.57E+06 | 5.79E+06 | 9.56E+06 | 7.72E+06 | 9.27E+06 | 0.79             | 5.33E-01 | 1.67E-01 | 0.99    | 5.13E-01 | 9.64E-01  | 4.90E+06 | 4.87E+06 |
| 4.70E+04 | 4.31E+04 | 1.16E+05 | 1.79E+05 | 1.56E+05 | 1.55E+05 | 0.80             | 9.52E-01 | 4.44E-01 | 0.99    | 1.07E+00 | 9.83E-01  | 6.82E+04 | 6.79E+04 |
| 3.42E+04 | 3.21E+04 | 1.54E+04 | 1.51E+04 | 2.74E+04 | 4.71E+04 | 0.73             | 1.21E+00 | 4.40E-01 | 0.99    | 1.50E+00 | 9.89E-01  | 3.88E+04 | 3.86E+04 |
| 2.08E+05 | 1.80E+05 | 1.91E+05 | 2.58E+05 | 2.89E+05 | 2.22E+05 | 0.76             | 5.87E-01 | 2.41E-01 | 0.99    | 5.67E-01 | 9.70E-01  | 1.60E+05 | 1.59E+05 |
| 1.90E+05 | 2.30E+05 | 2.54E+05 | 4.95E+05 | 4.41E+05 | 3.26E+05 | 0.76             | 6.97E-01 | 2.67E-01 | 0.99    | 6.60E-01 | 9.68E-01  | 2.27E+05 | 2.26E+05 |
| 1.16E+05 | 7.09E+04 | 7.03E+04 | 1.94E+05 | 2.17E+05 | 1.84E+05 | 0.77             | 1.01E+00 | 4.47E-01 | 0.99    | 1.10E+00 | 9.80E-01  | 9.11E+04 | 9.05E+04 |
| 3.57E+04 | 5.98E+04 | 6.78E+04 | 6.08E+04 | 7.99E+04 | 5.80E+04 | 0.76             | 6.78E-01 | 2.63E-01 | 0.99    | 7.26E-01 | 9.65E-01  | 4.43E+04 | 4.40E+04 |
| 6.47E+04 | 8.18E+04 | 8.55E+04 | 1.12E+05 | 1.07E+05 | 9.51E+04 | 0.76             | 5.42E-01 | 1.73E-01 | 0.99    | 5.09E-01 | 9.51E-01  | 6.49E+04 | 6.43E+04 |

14 Supplemental Table S2



| Accession # | Protein                                                        | # of Pep | PEPTIDE                           | Modification                                                 | XCorr | Charge | m/z [Da] |
|-------------|----------------------------------------------------------------|----------|-----------------------------------|--------------------------------------------------------------|-------|--------|----------|
| 226958456   | histidine-rich glycoprotein                                    | 1        | YSNESQDLSVNGYNCTTSSVSSALR         | Carbamidomethyl(15)Deamidated(3)Deamidated(11)Deamidated(14) | 4.98  | 3      | 914.7    |
| 568905353   | Extracellular sulfatase                                        | 3        | TFAVYLNNTGYR                      | Deamidated(7)                                                | 3.23  | 2      | 710.3    |
| 568920948   | Protocadherin Fat 4                                            | 3        | INITISDVNDHTPR                    | Deamidated(2)                                                | 4.09  | 3      | 532.6    |
| 6678459     | Trans-Golgi network integral membrane protein 1                | 1        | TDAELNETARPLSPVNP                 | Deamidated(6)                                                | 3.8   | 3      | 651.7    |
| 33859809    | Fibrinogen beta chain                                          | 2        | GTAGNALMDGASQLVGENR               | Deamidated(18)Oxidation(8)                                   | 4.36  | 3      | 626.6    |
| 150378501   | Carboxypeptidase D                                             | 4        | DLDTDFTSNASQPETK                  | Deamidated(9)                                                | 4.81  | 2      | 885.4    |
| 156616286   | Collagen alpha-6(VI) chain                                     | 11       | GIFSDVSASVCNSSK                   | Carbamidomethyl(11)Deamidated(12)                            | 3.89  | 2      | 779.9    |
| 6753066     | Membrane primary amine oxidase                                 | 2        | EALAIFFGGQPKPNVSELVVGPLPHPSYMR    | Deamidated(15)Oxidation(30)                                  | 6.24  | 4      | 845.9    |
| 110347469   | Alpha-2-macroglobulin                                          | 5        | SLGEVNFTATAEALQSPELCGNK           | Carbamidomethyl(20)Deamidated(6)                             | 6.86  | 3      | 813.1    |
| 6754900     | 5'-nucleotidase                                                | 3        | IKLDNYSTQELGR                     | Deamidated(5)                                                | 3.34  | 3      | 513.3    |
| 568947269   | Alpha-mannosidase 2x                                           | 1        | ANLTSMLIQR                        | Deamidated(2)Oxidation(6)                                    | 2.74  | 2      | 582.3    |
| 124494256   | Prolow-density lipoprotein receptor-related protein 1          | 22       | KLNLDGSNYTLLK                     | Deamidated(8)                                                | 3.31  | 3      | 493.9    |
| 157057166   | Toll-like receptor 9                                           | 5        | LGPEDLANLTSR                      | Deamidated(8)                                                | 4.12  | 2      | 700.4    |
| 568947434   | Aminopeptidase N                                               | 9        | AMFNITLIYPNNLIALSNMLPK            | Deamidated(4)Deamidated(11)Oxidation(2)Oxidation(19)         | 3.76  | 3      | 842.1    |
| 568960103   | N-acetylated-alpha-linked acidic dipeptidase 2                 | 3        | NYAASIFNISK                       | Deamidated(8)                                                | 2.6   | 2      | 636.3    |
| 568987678   | Gamma-sarcoglycan                                              | 2        | VDSSLLQSTQNVTSAR                  | Deamidated(12)                                               | 5.35  | 2      | 960.0    |
| 70608146    | Kin of IRRE-like protein 1                                     | 1        | VGSTNVSTLVNVHFAPR                 | Deamidated(5)                                                | 5.53  | 3      | 600.3    |
| 755504148   | Lysosomal protein NCU-G1                                       | 2        | GNHSLFGLEVATLGQGPDCPSVNER         | Carbamidomethyl(19)Deamidated(2)                             | 7.55  | 3      | 885.8    |
| 568960899   | Neuroplastin                                                   | 4        | KNASNMEYR                         | Deamidated(2)Oxidation(6)                                    | 2.73  | 2      | 565.3    |
| 153791270   | Laminin subunit gamma-1                                        | 12       | RIPAINR                           | Deamidated(6)                                                | 2.44  | 2      | 420.8    |
| 153791389   | Integrin alpha-1                                               | 13       | VTLDFNLTDPENGPVLDDALPNSVHGHIPIFAK | Deamidated(6)                                                | 7.65  | 4      | 861.7    |
| 160358825   | Beta-2-glycoprotein 1                                          | 3        | YTSFEYPKNISFACNPGFFLNGTSSSK       | Carbamidomethyl(14)Deamidated(9)Deamidated(21)               | 4.86  | 3      | 1022.5   |
| 13384938    | Endoplasmic reticulum-Golgi intermediate compartment protein 3 | 2        | SFQQSHVHVHDLQSFGLDNINMTHYIK       | Deamidated(21)Oxidation(22)                                  | 7.64  | 4      | 803.9    |
| 568947434   | Aminopeptidase N                                               | 9        | KQVTPLFFYFQNR                     | Deamidated(12)                                               | 4.04  | 3      | 563.6    |
| 54873610    | Receptor tyrosine-protein kinase erbB-2                        | 1        | YALAVLDNRDPLDNVTTAAPGR            | Deamidated(14)                                               | 6.23  | 3      | 781.7    |
| 568960005   | Choline transporter-like protein 2                             | 3        | GVLMSGNETTYEDGHGAR                | Deamidated(7)Oxidation(4)                                    | 4     | 3      | 641.6    |
| 58037305    | Alpha-(1,3)-fucosyltransferase 11                              | 1        | LFNLTATFSR                        | Deamidated(3)                                                | 2.65  | 2      | 585.8    |

14 Supplemental Table S2

| MH+ [Da] | RT [min] | PSM | WT-1     | WT-2     | WT-3     | WT-4     | WT-5     | WT-5-2   | WT-6     | WT-7     | WT-8     | Null-1   | Null-2   |
|----------|----------|-----|----------|----------|----------|----------|----------|----------|----------|----------|----------|----------|----------|
| 2742.2   | 41.8     | 11  | 6.00E+04 | 1.09E+05 | 1.20E+05 | 9.57E+04 | 2.29E+05 | 2.24E+05 | 7.37E+04 | 9.25E+04 | 9.59E+04 | 6.29E+04 | 1.13E+05 |
| 1419.7   | 42.8     | 2   | 1.06E+05 | 1.57E+05 | 1.97E+05 | 9.85E+04 | 2.64E+05 | 2.64E+05 | 4.87E+04 | 1.13E+05 | 6.75E+04 | 6.83E+04 | 1.49E+05 |
| 1595.8   | 35.4     | 2   | 5.41E+04 | 6.04E+04 | 8.28E+04 | 3.27E+04 | 1.10E+05 | 1.01E+05 | 2.38E+04 | 7.97E+04 | 2.76E+04 | 1.98E+04 | 5.64E+04 |
| 1953.0   | 31.1     | 15  | 2.73E+05 | 1.77E+05 | 3.10E+05 | 1.23E+05 | 4.02E+05 | 3.27E+05 | 1.39E+05 | 2.02E+05 | 1.33E+05 | 1.28E+05 | 2.25E+05 |
| 1877.9   | 35.0     | 595 | 1.63E+07 | 2.71E+07 | 2.68E+07 | 4.19E+07 | 2.36E+07 | 2.17E+07 | 8.36E+06 | 1.98E+07 | 1.20E+07 | 1.44E+07 | 1.47E+07 |
| 1769.8   | 36.6     | 18  | 1.87E+05 | 2.31E+05 | 3.07E+05 | 1.32E+05 | 2.83E+05 | 2.41E+05 | 1.58E+05 | 1.81E+05 | 1.40E+05 | 8.54E+04 | 1.73E+05 |
| 1558.7   | 41.4     | 16  | 2.34E+05 | 2.60E+05 | 4.95E+05 | 1.15E+05 | 8.53E+05 | 7.51E+05 | 2.13E+05 | 3.94E+05 | 1.70E+05 | 1.56E+05 | 4.64E+05 |
| 3380.8   | 59.1     | 16  | 1.99E+06 | 1.56E+06 | 4.18E+06 | 1.02E+06 | 5.30E+06 | 4.57E+06 | 6.62E+05 | 2.10E+06 | 1.51E+06 | 1.56E+06 | 2.66E+06 |
| 2437.2   | 53.0     | 29  | 3.64E+05 | 5.54E+05 | 5.67E+05 | 4.14E+05 | 8.38E+05 | 7.79E+05 | 1.54E+05 | 4.43E+05 | 4.06E+05 | 2.21E+05 | 4.78E+05 |
| 1537.8   | 32.8     | 10  | 1.67E+05 | 1.66E+05 | 2.70E+05 | 1.14E+05 | 3.27E+05 | 2.78E+05 | 1.36E+05 | 1.89E+05 | 1.31E+05 | 8.09E+04 | 1.81E+05 |
| 1163.6   | 36.6     | 2   | 7.21E+05 | 7.21E+05 | 9.71E+05 | 4.50E+05 | 1.10E+06 | 8.95E+05 | 5.22E+05 | 6.52E+05 | 3.80E+05 | 3.82E+05 | 6.38E+05 |
| 1479.8   | 37.7     | 3   | 2.54E+05 | 2.30E+05 | 3.56E+05 | 1.66E+05 | 4.28E+05 | 4.22E+05 | 1.67E+05 | 2.22E+05 | 1.78E+05 | 1.01E+05 | 1.69E+05 |
| 1399.7   | 55.0     | 10  | 4.80E+05 | 4.18E+05 | 6.41E+05 | 3.03E+05 | 6.47E+05 | 5.45E+05 | 1.80E+05 | 4.61E+05 | 1.91E+05 | 1.86E+05 | 4.22E+05 |
| 2524.3   | 69.8     | 39  | 1.94E+05 | 2.58E+05 | 3.60E+05 | 1.13E+05 | 1.75E+05 | 1.44E+05 | 1.96E+04 | 2.56E+05 | 5.29E+04 | 1.53E+04 | 8.28E+04 |
| 1271.6   | 59.3     | 22  | 1.15E+06 | 1.50E+06 | 1.82E+06 | 7.93E+05 | 1.82E+06 | 1.76E+06 | 9.07E+05 | 1.18E+06 | 7.84E+05 | 5.14E+05 | 1.16E+06 |
| 1919.0   | 46.1     | 160 | 1.00E+06 | 1.78E+06 | 7.10E+05 | 3.00E+06 | 1.40E+06 | 1.24E+06 | 4.53E+05 | 1.07E+06 | 7.49E+05 | 1.08E+06 | 9.61E+05 |
| 1798.9   | 42.7     | 15  | 2.03E+05 | 3.52E+05 | 3.73E+05 | 1.32E+05 | 4.96E+05 | 3.58E+05 | 9.37E+04 | 3.35E+05 | 1.26E+05 | 8.60E+04 | 3.40E+05 |
| 2655.2   | 50.0     | 11  | 1.50E+05 | 1.96E+05 | 2.72E+05 | 3.53E+04 | 3.11E+05 | 3.30E+05 | 7.05E+04 | 2.02E+05 | 9.78E+04 | 7.54E+04 | 2.01E+05 |
| 1129.5   | 15.8     | 1   | 7.36E+04 | 4.27E+04 | 3.99E+04 | 0.00E+00 | 2.27E+04 | 0.00E+00 | 6.43E+04 | 2.96E+04 | 1.18E+04 | 1.13E+04 | 3.05E+04 |
| 840.5    | 21.1     | 6   | 4.26E+06 | 3.89E+06 | 5.52E+06 | 4.72E+02 | 9.24E+06 | 8.69E+06 | 5.17E+06 | 4.25E+06 | 2.45E+06 | 2.63E+06 | 1.40E+06 |
| 3443.7   | 55.4     | 31  | 5.13E+05 | 6.84E+05 | 9.69E+05 | 2.43E+05 | 8.56E+05 | 9.52E+05 | 4.16E+04 | 6.07E+05 | 2.05E+05 | 8.89E+04 | 5.37E+05 |
| 3065.4   | 55.1     | 10  | 4.79E+04 | 4.23E+04 | 1.20E+05 | 2.06E+04 | 4.38E+05 | 4.08E+05 | 2.78E+04 | 8.87E+04 | 7.86E+04 | 4.06E+04 | 5.16E+04 |
| 3212.5   | 38.1     | 37  | 5.03E+05 | 8.21E+05 | 9.15E+05 | 2.99E+05 | 9.80E+05 | 8.70E+05 | 2.14E+05 | 5.69E+05 | 3.00E+05 | 2.92E+05 | 5.30E+05 |
| 1688.9   | 48.9     | 13  | 3.63E+05 | 4.67E+05 | 5.75E+05 | 2.79E+05 | 5.80E+05 | 4.90E+05 | 1.76E+05 | 4.16E+05 | 2.35E+05 | 1.38E+05 | 3.15E+05 |
| 2343.2   | 48.3     | 11  | 7.62E+04 | 1.47E+05 | 2.07E+05 | 7.97E+04 | 1.68E+05 | 1.50E+05 | 4.53E+04 | 1.03E+05 | 6.23E+04 | 3.22E+04 | 1.09E+05 |
| 1922.9   | 30.1     | 78  | 1.53E+06 | 1.73E+06 | 1.92E+06 | 7.30E+05 | 2.30E+06 | 2.02E+06 | 1.37E+06 | 1.64E+06 | 1.05E+06 | 6.75E+05 | 1.42E+06 |
| 1170.6   | 50.8     | 3   | 3.80E+04 | 7.27E+04 | 9.76E+04 | 4.19E+04 | 1.24E+05 | 1.08E+05 | 2.80E+04 | 5.64E+04 | 2.84E+04 | 7.94E+03 | 6.38E+04 |

14 Supplemental Table S2

| Null-3   | Null-4   | Null-5   | Null-6   | Null-7   | Null-8   | Ratio<br>Null/WT | SD       | p value  | N Ratio | N SD     | N p value | Avg_WT   | Avg_Null |
|----------|----------|----------|----------|----------|----------|------------------|----------|----------|---------|----------|-----------|----------|----------|
| 1.01E+05 | 8.82E+04 | 7.43E+04 | 1.26E+05 | 7.71E+04 | 9.49E+04 | 0.75             | 5.52E-01 | 1.99E-01 | 0.99    | 6.04E-01 | 9.58E-01  | 6.99E+04 | 6.94E+04 |
| 8.64E+04 | 8.60E+04 | 1.15E+05 | 1.34E+05 | 1.24E+05 | 1.08E+05 | 0.75             | 5.94E-01 | 2.18E-01 | 0.99    | 5.92E-01 | 9.57E-01  | 8.16E+04 | 8.09E+04 |
| 2.61E+04 | 4.80E+04 | 4.52E+04 | 6.15E+04 | 7.67E+04 | 6.40E+04 | 0.78             | 6.94E-01 | 2.90E-01 | 0.99    | 7.04E-01 | 9.61E-01  | 3.63E+04 | 3.60E+04 |
| 9.87E+04 | 1.63E+05 | 1.60E+05 | 1.84E+05 | 2.65E+05 | 1.95E+05 | 0.76             | 5.57E-01 | 1.78E-01 | 0.99    | 4.92E-01 | 9.41E-01  | 1.32E+05 | 1.30E+05 |
| 2.59E+07 | 1.34E+07 | 1.24E+07 | 2.16E+07 | 1.28E+07 | 1.43E+07 | 0.74             | 5.52E-01 | 1.45E-01 | 0.99    | 7.56E-01 | 9.55E-01  | 1.26E+07 | 1.25E+07 |
| 1.21E+05 | 1.28E+05 | 1.67E+05 | 2.01E+05 | 2.18E+05 | 1.99E+05 | 0.78             | 4.59E-01 | 1.09E-01 | 0.99    | 4.13E-01 | 9.16E-01  | 1.20E+05 | 1.19E+05 |
| 2.02E+05 | 2.93E+05 | 2.51E+05 | 3.27E+05 | 2.72E+05 | 3.37E+05 | 0.74             | 7.45E-01 | 3.12E-01 | 0.99    | 7.92E-01 | 9.57E-01  | 2.15E+05 | 2.13E+05 |
| 1.90E+06 | 1.17E+06 | 1.76E+06 | 2.32E+06 | 2.09E+06 | 1.47E+06 | 0.73             | 6.77E-01 | 2.78E-01 | 0.99    | 7.53E-01 | 9.46E-01  | 1.42E+06 | 1.40E+06 |
| 3.11E+05 | 4.55E+05 | 2.53E+05 | 3.98E+05 | 3.11E+05 | 6.97E+05 | 0.78             | 6.34E-01 | 2.29E-01 | 0.99    | 6.67E-01 | 9.35E-01  | 2.92E+05 | 2.88E+05 |
| 1.01E+05 | 1.39E+05 | 1.34E+05 | 2.32E+05 | 2.15E+05 | 1.41E+05 | 0.77             | 5.63E-01 | 1.76E-01 | 0.99    | 5.19E-01 | 9.15E-01  | 1.14E+05 | 1.12E+05 |
| 4.03E+05 | 4.68E+05 | 5.43E+05 | 7.02E+05 | 6.25E+05 | 5.55E+05 | 0.76             | 4.19E-01 | 8.10E-02 | 0.99    | 3.53E-01 | 8.77E-01  | 4.07E+05 | 4.01E+05 |
| 1.56E+05 | 2.07E+05 | 1.68E+05 | 3.25E+05 | 2.94E+05 | 2.43E+05 | 0.77             | 5.82E-01 | 1.85E-01 | 0.99    | 5.26E-01 | 9.12E-01  | 1.54E+05 | 1.52E+05 |
| 1.81E+05 | 3.60E+05 | 2.68E+05 | 4.66E+05 | 3.78E+05 | 3.67E+05 | 0.77             | 5.58E-01 | 1.68E-01 | 0.99    | 5.64E-01 | 9.19E-01  | 2.45E+05 | 2.41E+05 |
| 5.41E+04 | 6.98E+04 | 1.17E+05 | 3.04E+05 | 2.76E+05 | 2.42E+05 | 0.83             | 1.15E+00 | 5.86E-01 | 0.98    | 1.29E+00 | 9.62E-01  | 1.02E+05 | 1.00E+05 |
| 5.83E+05 | 1.11E+06 | 8.49E+05 | 1.43E+06 | 1.24E+06 | 1.17E+06 | 0.77             | 5.09E-01 | 1.33E-01 | 0.98    | 4.83E-01 | 8.86E-01  | 7.50E+05 | 7.37E+05 |
| 1.68E+06 | 6.79E+05 | 6.01E+05 | 1.06E+06 | 6.06E+05 | 6.26E+05 | 0.72             | 7.24E-01 | 2.37E-01 | 0.98    | 1.03E+00 | 9.43E-01  | 7.29E+05 | 7.16E+05 |
| 1.63E+05 | 1.60E+05 | 1.37E+05 | 3.24E+05 | 2.11E+05 | 2.80E+05 | 0.77             | 7.30E-01 | 2.94E-01 | 0.98    | 7.90E-01 | 9.24E-01  | 1.58E+05 | 1.55E+05 |
| 1.09E+05 | 1.51E+05 | 8.52E+04 | 1.66E+05 | 1.42E+05 | 2.00E+05 | 0.76             | 6.96E-01 | 2.86E-01 | 0.98    | 7.28E-01 | 9.16E-01  | 1.06E+05 | 1.04E+05 |
| 2.12E+04 | 8.55E+03 | 3.78E+04 | 2.68E+04 | 2.94E+04 | 3.17E+04 | 0.78             | 9.70E-01 | 4.78E-01 | 0.98    | 1.15E+00 | 9.47E-01  | 1.86E+04 | 1.82E+04 |
| 2.80E+06 | 4.02E+06 | 3.07E+06 | 6.12E+06 | 4.89E+06 | 3.88E+06 | 0.75             | 7.45E-01 | 2.79E-01 | 0.98    | 7.70E-01 | 9.17E-01  | 2.72E+06 | 2.67E+06 |
| 2.73E+05 | 3.28E+05 | 3.78E+05 | 7.38E+05 | 6.71E+05 | 4.77E+05 | 0.77             | 8.47E-01 | 3.68E-01 | 0.98    | 9.12E-01 | 9.30E-01  | 3.19E+05 | 3.13E+05 |
| 7.97E+04 | 3.44E+04 | 9.83E+04 | 2.30E+05 | 1.70E+05 | 1.26E+05 | 0.73             | 1.33E+00 | 5.41E-01 | 0.98    | 1.50E+00 | 9.57E-01  | 7.58E+04 | 7.43E+04 |
| 3.64E+05 | 4.15E+05 | 3.51E+05 | 5.95E+05 | 6.00E+05 | 5.34E+05 | 0.76             | 5.66E-01 | 1.97E-01 | 0.98    | 5.28E-01 | 8.75E-01  | 3.47E+05 | 3.39E+05 |
| 1.78E+05 | 2.95E+05 | 2.12E+05 | 4.94E+05 | 4.65E+05 | 3.96E+05 | 0.78             | 6.18E-01 | 2.20E-01 | 0.98    | 6.05E-01 | 8.72E-01  | 2.30E+05 | 2.25E+05 |
| 6.10E+04 | 8.78E+04 | 7.03E+04 | 1.20E+05 | 1.16E+05 | 1.12E+05 | 0.77             | 6.38E-01 | 2.32E-01 | 0.98    | 6.40E-01 | 8.80E-01  | 6.60E+04 | 6.44E+04 |
| 8.06E+05 | 1.30E+06 | 1.14E+06 | 1.67E+06 | 1.56E+06 | 1.22E+06 | 0.77             | 4.55E-01 | 9.53E-02 | 0.97    | 4.51E-01 | 8.26E-01  | 9.25E+05 | 9.02E+05 |
| 3.35E+04 | 5.32E+04 | 4.32E+04 | 7.80E+04 | 3.84E+04 | 7.93E+04 | 0.75             | 7.76E-01 | 2.84E-01 | 0.97    | 8.21E-01 | 9.00E-01  | 3.70E+04 | 3.60E+04 |

14 Supplemental Table S2

| Accession # | Protein                                                   | # of Pep | PEPTIDE                  | Modification                                 | XCorr | Charge | m/z [Da] |
|-------------|-----------------------------------------------------------|----------|--------------------------|----------------------------------------------|-------|--------|----------|
| 227500531   | Collagen 16 alpha 1                                       | 1        | LEHSSDPSTNVTGFNLIR       | Deamidated(10)                               | 5.64  | 3      | 663.3    |
| 32171188    | TM2 domain-containing protein 1                           | 1        | LSITNETFR                | Deamidated(5)                                | 2.6   | 2      | 541.3    |
| 171543883   | Nidogen-1                                                 | 1        | CVANYTGNGR               | Carbamidomethyl(1)Deamidated(4)Deamidated(8) | 3.01  | 2      | 557.2    |
| 568936922   | P2X purinoceptor 4                                        | 4        | AAENFTLLVK               | Deamidated(4)                                | 2.67  | 2      | 553.8    |
| 19527130    | EMILIN-1                                                  | 7        | FNSTLGPSEEQEK            | Deamidated(2)                                | 3.85  | 2      | 733.8    |
| 41529818    | Growth/differentiation factor 6                           | 1        | LGINASFFQSSK             | Deamidated(4)                                | 3.1   | 2      | 650.3    |
| 339895744   | Collagen alpha-3(VI) chain                                | 5        | QNLTVTDR                 | Deamidated(2)                                | 2.72  | 2      | 474.2    |
| 19527008    | Group XV phospholipase A2                                 | 2        | VFVYPTTNYTLR             | Deamidated(9)                                | 3.05  | 2      | 788.4    |
| 568954605   | Macrophage scavenger receptor 1                           | 3        | SLQSLNMTLLDVQLHTETLNVR   | Deamidated(6)Oxidation(7)                    | 6.93  | 3      | 848.1    |
| 568947434   | Aminopeptidase N                                          | 9        | QVTPLFFYFQNR             | Deamidated(11)                               | 3.63  | 2      | 780.9    |
| 18087747    | Protocadherin gamma subfamily C, 3                        | 2        | ITVLDANDNAPAFNQSLYR      | Deamidated(14)                               | 4.68  | 2      | 1062.0   |
| 6755144     | Galectin-3-binding protein                                | 3        | GLNLTEDTYKPR             | Deamidated(3)                                | 3.58  | 3      | 469.9    |
| 124487171   | Probable G-protein coupled receptor 116                   | 3        | ANEQVIQNLNHTYK           | Deamidated(10)                               | 4.64  | 3      | 558.3    |
| 6753332     | Monocyte differentiation antigen CD14                     | 3        | NPSPDELPQVGNLCLK         | Deamidated(12)                               | 3.29  | 2      | 854.9    |
| 568994656   | Leukocyte surface antigen CD47                            | 3        | DAMVGNITCEVTELSR         | Carbamidomethyl(9)Deamidated(6)Oxidation(3)  | 4.2   | 2      | 931.4    |
| 19527206    | CD276 antigen                                             | 3        | TALFPDLLVQGNASLR         | Deamidated(12)                               | 4.04  | 2      | 858.5    |
| 85719301    | carcinoembryonic antigen-related cell adhesion molecule 1 | 4        | FVPNSNMNFTGQAYSGR        | Deamidated(4)Deamidated(8)Oxidation(7)       | 3.75  | 2      | 953.9    |
| 90568038    | ATP-binding cassette subfamily A member 1                 | 3        | EAFNETNQAIQTISR          | Deamidated(4)                                | 3.94  | 2      | 861.9    |
| 568920137   | Laminin subunit alpha-5                                   | 15       | LHRLNASIADLQSK           | Deamidated(5)                                | 3.67  | 3      | 523.0    |
| 568991301   | Plexin B2                                                 | 10       | QGPQAGGTTTLTINGTHLDTGSK  | Deamidated(13)                               | 5.52  | 3      | 719.0    |
| 9055172     | ATPase, H+ transporting, lysosomal accessory protein      | 2        | QLLQTQVASPAIHPPVSYNDTAPR | Deamidated(19)                               | 5.39  | 3      | 868.8    |
| 19527130    | EMILIN-1                                                  | 7        | LEGLLANVSR               | Deamidated(7)                                | 3.4   | 2      | 536.8    |
| 27370240    | Leucyl-cystinyl aminopeptidase                            | 8        | TNQSAELIQPVATNGK         | Deamidated(2)Deamidated(14)                  | 4     | 2      | 836.9    |
| 31543108    | Lysosome-associated membrane glycoprotein 2               | 4        | EVNVYMYLANGSAFNISNK      | Deamidated(10)Deamidated(15)Oxidation(6)     | 5.16  | 3      | 718.0    |
| 160333372   | Lumican                                                   | 5        | LHINYNNLTESVGPLPK        | Deamidated(7)                                | 3.97  | 3      | 637.7    |
| 568976482   | Cystinosin                                                | 1        | SKNLTIIVLPDEVIVPR        | Deamidated(3)                                | 3.1   | 3      | 641.7    |
| 568960899   | Neuroplastin                                              | 4        | ANATIEVK                 | Deamidated(2)                                | 2.44  | 2      | 423.7    |
| 568931034   | Endothelin-converting enzyme 1                            | 3        | HLLLENATASVSEAER         | Deamidated(5)                                | 4.75  | 3      | 543.3    |
| 6755144     | Galectin-3-binding protein                                | 3        | ALGYENATQALGR            | Deamidated(6)                                | 3.36  | 2      | 682.8    |

14 Supplemental Table S2

| MH+ [Da] | RT [min] | PSM | WT-1     | WT-2     | WT-3     | WT-4     | WT-5     | WT-5-2   | WT-6     | WT-7     | WT-8     | Null-1   | Null-2   |
|----------|----------|-----|----------|----------|----------|----------|----------|----------|----------|----------|----------|----------|----------|
| 1988.0   | 41.1     | 17  | 2.52E+05 | 3.58E+05 | 4.40E+05 | 1.51E+05 | 5.59E+05 | 5.49E+05 | 1.14E+05 | 2.56E+05 | 9.20E+04 | 2.35E+05 | 2.09E+05 |
| 1081.6   | 36.9     | 5   | 1.22E+05 | 8.22E+04 | 1.51E+05 | 3.46E+04 | 2.08E+05 | 2.01E+05 | 8.35E+04 | 9.53E+04 | 7.08E+04 | 6.79E+04 | 1.02E+05 |
| 1113.5   | 21.4     | 19  | 1.70E+06 | 2.59E+05 | 6.05E+05 | 3.81E+02 | 3.01E+06 | 2.85E+06 | 1.40E+06 | 3.23E+05 | 1.33E+05 | 1.53E+05 | 1.03E+06 |
| 1106.6   | 44.5     | 11  | 1.57E+06 | 1.64E+06 | 1.73E+06 | 6.51E+05 | 1.70E+06 | 1.61E+06 | 5.95E+05 | 1.17E+06 | 5.97E+05 | 4.52E+05 | 1.22E+06 |
| 1466.7   | 27.8     | 29  | 1.46E+06 | 1.48E+06 | 1.63E+06 | 8.90E+05 | 3.08E+06 | 2.64E+06 | 1.08E+06 | 1.54E+06 | 7.75E+05 | 7.96E+05 | 1.70E+06 |
| 1299.7   | 47.2     | 3   | 8.37E+04 | 1.62E+05 | 1.48E+05 | 5.56E+04 | 1.56E+05 | 1.48E+05 | 3.09E+04 | 8.28E+04 | 2.97E+04 | 2.10E+04 | 6.84E+04 |
| 947.5    | 21.8     | 4   | 1.39E+05 | 1.01E+05 | 2.01E+05 | 2.65E+04 | 2.76E+05 | 2.71E+05 | 1.19E+05 | 1.09E+05 | 9.45E+04 | 9.70E+04 | 8.27E+04 |
| 1575.8   | 44.8     | 13  | 1.60E+05 | 1.44E+05 | 1.37E+05 | 7.10E+04 | 2.95E+05 | 2.09E+05 | 6.33E+04 | 9.41E+04 | 6.20E+04 | 8.46E+04 | 8.22E+04 |
| 2542.3   | 54.8     | 18  | 3.58E+05 | 7.51E+05 | 1.09E+06 | 2.75E+05 | 7.38E+05 | 7.30E+05 | 2.64E+05 | 4.94E+05 | 1.71E+05 | 5.08E+04 | 4.76E+05 |
| 1560.8   | 58.2     | 49  | 5.99E+05 | 8.19E+05 | 1.12E+06 | 4.32E+05 | 9.50E+05 | 8.85E+05 | 2.44E+05 | 6.67E+05 | 4.35E+05 | 2.43E+05 | 6.67E+05 |
| 2123.0   | 48.3     | 5   | 5.96E+04 | 6.74E+04 | 6.73E+04 | 4.59E+04 | 1.31E+05 | 1.20E+05 | 4.39E+04 | 6.72E+04 | 3.20E+04 | 2.65E+04 | 5.25E+04 |
| 1407.7   | 31.3     | 20  | 6.12E+05 | 4.70E+05 | 7.57E+05 | 3.05E+05 | 9.89E+05 | 9.07E+05 | 4.41E+05 | 4.94E+05 | 2.29E+05 | 2.13E+05 | 4.98E+05 |
| 1672.8   | 30.5     | 12  | 1.38E+05 | 8.29E+04 | 1.40E+05 | 6.35E+04 | 1.90E+05 | 1.90E+05 | 6.43E+04 | 8.41E+04 | 5.27E+04 | 6.52E+04 | 8.11E+04 |
| 1708.9   | 47.0     | 17  | 2.15E+05 | 2.53E+05 | 2.79E+05 | 1.79E+05 | 2.55E+05 | 2.44E+05 | 1.54E+05 | 1.97E+05 | 1.73E+05 | 7.45E+04 | 2.21E+05 |
| 1861.8   | 42.4     | 37  | 2.08E+06 | 2.33E+06 | 3.04E+06 | 1.11E+06 | 3.41E+06 | 2.88E+06 | 1.83E+06 | 1.66E+06 | 1.46E+06 | 9.59E+05 | 2.07E+06 |
| 1715.9   | 59.2     | 24  | 1.94E+05 | 3.80E+05 | 5.26E+05 | 1.82E+05 | 3.69E+05 | 2.95E+05 | 5.68E+04 | 3.20E+05 | 1.24E+05 | 4.08E+04 | 3.29E+05 |
| 1906.8   | 33.4     | 38  | 3.28E+05 | 3.76E+05 | 4.43E+05 | 2.97E+05 | 6.24E+05 | 6.12E+05 | 3.12E+05 | 3.24E+05 | 2.70E+05 | 2.10E+05 | 3.70E+05 |
| 1722.8   | 39.3     | 7   | 2.01E+05 | 2.45E+05 | 2.62E+05 | 1.27E+05 | 3.10E+05 | 2.67E+05 | 2.24E+05 | 1.85E+05 | 1.09E+05 | 8.42E+04 | 2.07E+05 |
| 1566.9   | 30.0     | 3   | 1.05E+05 | 1.01E+05 | 1.71E+05 | 6.36E+04 | 3.86E+05 | 3.56E+05 | 7.21E+04 | 1.21E+05 | 8.35E+04 | 1.02E+05 | 6.57E+04 |
| 2155.1   | 33.6     | 12  | 3.97E+05 | 3.11E+05 | 5.44E+05 | 1.58E+05 | 4.81E+05 | 5.36E+05 | 2.68E+05 | 3.22E+05 | 1.82E+05 | 1.75E+05 | 2.65E+05 |
| 2604.3   | 41.3     | 17  | 1.63E+05 | 1.54E+05 | 2.76E+05 | 7.02E+04 | 2.68E+05 | 2.75E+05 | 1.12E+05 | 1.53E+05 | 1.09E+05 | 1.02E+05 | 1.51E+05 |
| 1072.6   | 41.7     | 50  | 1.11E+07 | 1.23E+07 | 1.93E+07 | 7.67E+06 | 2.56E+07 | 2.32E+07 | 7.15E+06 | 1.21E+07 | 6.26E+06 | 8.26E+06 | 1.20E+07 |
| 1672.8   | 35.0     | 55  | 4.58E+05 | 3.82E+05 | 7.61E+05 | 2.08E+05 | 8.29E+05 | 7.24E+05 | 4.33E+05 | 4.71E+05 | 2.96E+05 | 1.90E+05 | 4.35E+05 |
| 2152.0   | 57.2     | 74  | 1.39E+06 | 2.04E+06 | 1.64E+06 | 1.53E+06 | 2.98E+06 | 2.59E+06 | 4.15E+05 | 2.11E+06 | 7.92E+05 | 7.86E+05 | 1.62E+06 |
| 1911.0   | 42.8     | 253 | 1.60E+05 | 1.68E+05 | 3.38E+05 | 2.01E+05 | 5.55E+05 | 4.88E+05 | 7.62E+04 | 3.46E+05 | 1.53E+05 | 1.87E+05 | 2.96E+05 |
| 1923.1   | 50.1     | 9   | 1.23E+05 | 1.46E+05 | 2.33E+05 | 8.13E+04 | 2.93E+05 | 2.55E+05 | 7.14E+04 | 1.52E+05 | 6.83E+04 | 7.00E+04 | 1.80E+05 |
| 846.5    | 21.9     | 6   | 7.01E+05 | 5.84E+05 | 7.95E+05 | 7.92E+02 | 1.09E+06 | 1.06E+06 | 5.71E+05 | 5.88E+05 | 2.99E+05 | 2.32E+05 | 5.43E+05 |
| 1627.8   | 31.6     | 18  | 1.63E+05 | 2.31E+05 | 2.37E+05 | 1.05E+05 | 2.40E+05 | 1.95E+05 | 1.44E+05 | 1.43E+05 | 1.10E+05 | 6.48E+04 | 1.33E+05 |
| 1364.7   | 36.9     | 27  | 1.67E+06 | 1.40E+06 | 2.11E+06 | 8.27E+05 | 2.60E+06 | 2.37E+06 | 1.03E+06 | 1.17E+06 | 6.12E+05 | 6.55E+05 | 1.37E+06 |

14 Supplemental Table S2

| Null-3   | Null-4   | Null-5   | Null-6   | Null-7   | Null-8   | Ratio<br>Null/WT | SD       | p value  | N Ratio | N SD     | N p value | Avg_WT   | Avg_Null |
|----------|----------|----------|----------|----------|----------|------------------|----------|----------|---------|----------|-----------|----------|----------|
| 1.50E+05 | 3.08E+05 | 1.50E+05 | 1.79E+05 | 2.21E+05 | 3.04E+05 | 0.71             | 6.15E-01 | 1.94E-01 | 0.97    | 7.43E-01 | 8.90E-01  | 1.70E+05 | 1.66E+05 |
| 6.87E+04 | 6.86E+04 | 8.22E+04 | 8.72E+04 | 1.14E+05 | 9.95E+04 | 0.74             | 5.29E-01 | 1.79E-01 | 0.97    | 4.63E-01 | 8.45E-01  | 6.60E+04 | 6.42E+04 |
| 2.54E+05 | 5.51E+05 | 6.98E+05 | 1.22E+06 | 1.33E+06 | 1.30E+06 | 0.71             | 1.14E+00 | 4.57E-01 | 0.97    | 1.36E+00 | 9.41E-01  | 5.90E+05 | 5.75E+05 |
| 5.60E+05 | 9.13E+05 | 7.67E+05 | 1.42E+06 | 1.11E+06 | 1.24E+06 | 0.77             | 5.87E-01 | 1.85E-01 | 0.97    | 5.90E-01 | 8.59E-01  | 7.18E+05 | 6.99E+05 |
| 8.90E+05 | 1.31E+06 | 8.83E+05 | 1.11E+06 | 1.54E+06 | 1.35E+06 | 0.74             | 5.57E-01 | 1.64E-01 | 0.97    | 5.29E-01 | 8.43E-01  | 9.12E+05 | 8.87E+05 |
| 8.39E+04 | 6.71E+04 | 6.37E+04 | 1.27E+05 | 7.08E+04 | 8.93E+04 | 0.74             | 7.02E-01 | 2.41E-01 | 0.97    | 8.30E-01 | 8.97E-01  | 5.60E+04 | 5.45E+04 |
| 7.00E+04 | 7.04E+04 | 1.07E+05 | 1.47E+05 | 1.47E+05 | 1.65E+05 | 0.75             | 6.76E-01 | 2.50E-01 | 0.97    | 6.45E-01 | 8.71E-01  | 8.39E+04 | 8.16E+04 |
| 8.83E+04 | 1.04E+05 | 7.55E+04 | 1.35E+05 | 1.00E+05 | 1.22E+05 | 0.72             | 5.58E-01 | 1.87E-01 | 0.97    | 5.50E-01 | 8.54E-01  | 7.63E+04 | 7.42E+04 |
| 3.57E+05 | 2.49E+05 | 2.96E+05 | 7.95E+05 | 5.76E+05 | 5.09E+05 | 0.77             | 8.49E-01 | 3.41E-01 | 0.97    | 9.41E-01 | 9.01E-01  | 3.05E+05 | 2.96E+05 |
| 3.04E+05 | 4.78E+05 | 3.43E+05 | 8.52E+05 | 7.17E+05 | 6.62E+05 | 0.78             | 6.50E-01 | 2.41E-01 | 0.97    | 6.50E-01 | 8.58E-01  | 3.97E+05 | 3.85E+05 |
| 4.18E+04 | 4.79E+04 | 3.94E+04 | 8.82E+04 | 8.05E+04 | 4.39E+04 | 0.75             | 6.55E-01 | 2.06E-01 | 0.97    | 6.21E-01 | 8.50E-01  | 3.96E+04 | 3.85E+04 |
| 2.93E+05 | 4.68E+05 | 3.65E+05 | 5.89E+05 | 4.99E+05 | 4.79E+05 | 0.74             | 5.47E-01 | 1.44E-01 | 0.97    | 5.03E-01 | 8.16E-01  | 3.23E+05 | 3.13E+05 |
| 6.48E+04 | 7.95E+04 | 8.37E+04 | 9.67E+04 | 1.06E+05 | 6.88E+04 | 0.72             | 4.82E-01 | 1.32E-01 | 0.97    | 4.59E-01 | 8.12E-01  | 6.24E+04 | 6.05E+04 |
| 1.19E+05 | 1.41E+05 | 1.45E+05 | 2.32E+05 | 2.26E+05 | 1.98E+05 | 0.78             | 4.26E-01 | 8.60E-02 | 0.97    | 4.57E-01 | 7.86E-01  | 1.28E+05 | 1.24E+05 |
| 1.17E+06 | 1.64E+06 | 1.51E+06 | 2.04E+06 | 2.06E+06 | 1.82E+06 | 0.75             | 4.59E-01 | 9.48E-02 | 0.97    | 3.98E-01 | 7.61E-01  | 1.26E+06 | 1.22E+06 |
| 1.48E+05 | 2.03E+05 | 1.18E+05 | 2.84E+05 | 2.76E+05 | 2.98E+05 | 0.78             | 7.93E-01 | 3.38E-01 | 0.97    | 8.83E-01 | 8.88E-01  | 1.57E+05 | 1.52E+05 |
| 2.66E+05 | 2.87E+05 | 2.88E+05 | 3.56E+05 | 2.60E+05 | 3.19E+05 | 0.74             | 3.80E-01 | 5.55E-02 | 0.97    | 3.63E-01 | 7.35E-01  | 2.29E+05 | 2.21E+05 |
| 1.28E+05 | 1.48E+05 | 1.10E+05 | 2.42E+05 | 1.83E+05 | 1.93E+05 | 0.75             | 4.81E-01 | 8.93E-02 | 0.97    | 4.28E-01 | 7.67E-01  | 1.23E+05 | 1.19E+05 |
| 1.05E+05 | 6.93E+04 | 7.59E+04 | 2.53E+05 | 1.98E+05 | 6.90E+04 | 0.72             | 9.80E-01 | 3.66E-01 | 0.97    | 1.05E+00 | 9.04E-01  | 8.92E+04 | 8.64E+04 |
| 2.19E+05 | 2.34E+05 | 2.48E+05 | 4.29E+05 | 2.95E+05 | 2.49E+05 | 0.74             | 5.12E-01 | 1.21E-01 | 0.97    | 4.95E-01 | 8.01E-01  | 2.03E+05 | 1.96E+05 |
| 1.05E+05 | 1.11E+05 | 1.15E+05 | 1.84E+05 | 1.51E+05 | 1.25E+05 | 0.74             | 4.95E-01 | 1.37E-01 | 0.97    | 4.63E-01 | 7.92E-01  | 1.01E+05 | 9.72E+04 |
| 7.76E+06 | 1.10E+07 | 7.43E+06 | 1.16E+07 | 1.17E+07 | 1.03E+07 | 0.72             | 5.10E-01 | 1.55E-01 | 0.97    | 4.92E-01 | 8.07E-01  | 7.74E+06 | 7.48E+06 |
| 2.50E+05 | 3.20E+05 | 3.67E+05 | 5.34E+05 | 5.61E+05 | 4.01E+05 | 0.75             | 5.77E-01 | 1.68E-01 | 0.97    | 5.20E-01 | 8.00E-01  | 2.89E+05 | 2.79E+05 |
| 1.39E+06 | 1.13E+06 | 9.65E+05 | 1.56E+06 | 1.42E+06 | 1.34E+06 | 0.74             | 5.20E-01 | 1.55E-01 | 0.97    | 5.87E-01 | 8.30E-01  | 9.86E+05 | 9.53E+05 |
| 1.15E+05 | 1.79E+05 | 1.20E+05 | 2.09E+05 | 2.55E+05 | 2.85E+05 | 0.74             | 6.94E-01 | 2.65E-01 | 0.97    | 7.34E-01 | 8.61E-01  | 1.57E+05 | 1.52E+05 |
| 7.89E+04 | 1.06E+05 | 9.29E+04 | 1.34E+05 | 1.32E+05 | 1.37E+05 | 0.74             | 6.20E-01 | 2.01E-01 | 0.97    | 6.12E-01 | 8.31E-01  | 8.87E+04 | 8.57E+04 |
| 3.23E+05 | 4.16E+05 | 4.56E+05 | 6.32E+05 | 5.99E+05 | 5.73E+05 | 0.75             | 6.29E-01 | 2.26E-01 | 0.97    | 5.93E-01 | 8.27E-01  | 3.58E+05 | 3.46E+05 |
| 1.07E+05 | 1.07E+05 | 1.33E+05 | 2.09E+05 | 1.62E+05 | 1.41E+05 | 0.76             | 4.77E-01 | 9.26E-02 | 0.96    | 4.69E-01 | 7.62E-01  | 1.01E+05 | 9.73E+04 |
| 7.52E+05 | 1.21E+06 | 8.62E+05 | 1.50E+06 | 1.20E+06 | 1.38E+06 | 0.73             | 5.41E-01 | 1.36E-01 | 0.96    | 4.92E-01 | 7.75E-01  | 8.54E+05 | 8.23E+05 |

14 Supplemental Table S2

| Accession # | Protein                                               | # of Pep | PEPTIDE                                | Modification                                          | XCorr | Charge | m/z [Da] |
|-------------|-------------------------------------------------------|----------|----------------------------------------|-------------------------------------------------------|-------|--------|----------|
| 27370240    | Leucyl-cystinyl aminopeptidase                        | 8        | EETLLYDNATSSVADRK                      | Deamidated(8)                                         | 5.38  | 3      | 638.3    |
| 568922258   | Sortilin                                              | 2        | DITNLINNTFIR                           | Deamidated(7)                                         | 3.92  | 2      | 717.9    |
| 357588455   | Extracellular sulfatase Sulf-2                        | 3        | LFPNASQHITPSYNYAPNPK                   | Deamidated(4)                                         | 3.8   | 3      | 792.4    |
| 568935277   | SPARC-like protein 1                                  | 1        | ILDQACGTDNQTYASSCHLFATK                | Carbamidomethyl(6)Carbamidomethyl(17)Deamidated(10)   | 4.51  | 3      | 868.1    |
| 568911077   | Nicastrin                                             | 4        | SYLDDRPLQHYIAVSSPTNTTYVVQYALANLTGK     | Deamidated(19)Deamidated(30)                          | 8.29  | 4      | 951.0    |
| 6753224     | C3a anaphylatoxin chemotactic receptor                | 1        | LSLPESNSTDNSTAQLTGHMNDR                | Deamidated(7)Deamidated(11)Oxidation(20)              | 5.9   | 3      | 836.0    |
| 10946680    | Fibromodulin                                          | 3        | VPNNALEGLENLTAALYHHNEIQEVGSSMR         | Deamidated(11)Oxidation(29)                           | 4.03  | 4      | 841.9    |
| 568911032   | Cellular repressor of E1A-stimulated genes 1          | 1        | VNKTEEDYAR                             | Deamidated(2)                                         | 3.15  | 3      | 409.2    |
| 6679389     | Plexin-A1                                             | 2        | LSGNLTLR                               | Deamidated(4)                                         | 2.81  | 2      | 494.3    |
| 755532856   | Laminin, alpha 2                                      | 17       | ELEDNLKKNISEIK                         | Deamidated(9)                                         | 4.2   | 3      | 558.6    |
| 568922760   | Immunoglobulin superfamily member 10                  | 6        | FHVLPNGTLSIQR                          | Deamidated(6)                                         | 3.82  | 3      | 494.9    |
| 568910633   | Glycosaminoglycan xylosylkinase                       | 1        | TEVKPVATEQLLSTFLTVMGNTCFYGK            | Carbamidomethyl(23)Deamidated(20)                     | 6.38  | 3      | 1006.8   |
| 568954605   | Macrophage scavenger receptor 1                       | 3        | VLNNITNDLR                             | Deamidated(3)Deamidated(4)                            | 3.24  | 2      | 587.3    |
| 568954529   | Protocadherin Fat 1                                   | 6        | LEPTPPIQFTHFQYNVTVHENSAAK              | Deamidated(15)                                        | 4.39  | 4      | 718.1    |
| 124494256   | Prolow-density lipoprotein receptor-related protein 1 | 22       | LNLDGSNYTLLK                           | Deamidated(7)                                         | 3.73  | 2      | 676.4    |
| 6753484     | Collagen alpha-1(VI) chain                            | 5        | ENYAELLDDGFLKNITAQICIDKK               | Carbamidomethyl(20)Deamidated(14)                     | 7.56  | 4      | 703.9    |
| 116734815   | Glucosylceramidase                                    | 2        | DLGPALANSSHDVK                         | Deamidated(8)                                         | 4.55  | 3      | 475.6    |
| 124494256   | Prolow-density lipoprotein receptor-related protein 1 | 22       | NSTTLVMHMK                             | Deamidated(1)Oxidation(7)Oxidation(9)                 | 2.58  | 2      | 597.8    |
| 568954537   | Toll-like receptor 3                                  | 1        | LTHIPDDLPSNITVLNLTHNQLR                | Deamidated(11)Deamidated(16)                          | 5.86  | 4      | 657.4    |
| 568947434   | Aminopeptidase N                                      | 9        | NPNNNTIHPNLR                           | Deamidated(3)Deamidated(4)                            | 3.76  | 3      | 468.9    |
| 110347469   | Alpha-2-macroglobulin                                 | 5        | VVSVDISFRPLNETFPVVIETPK                | Deamidated(12)                                        | 4.48  | 3      | 917.5    |
| 90568038    | ATP-binding cassette sub-family A member 1            | 3        | GENPSQYGITAFNHPLNLTK                   | Deamidated(17)                                        | 6.39  | 3      | 734.7    |
| 111955338   | Ly-9.2 antigen                                        | 1        | VSEDEGYSLYMSNLTK                       | Deamidated(12)Oxidation(10)                           | 4.47  | 2      | 862.4    |
| 6680840     | Calumenin                                             | 2        | NATYGYVLDDPDPDDGFNYK                   | Deamidated(1)                                         | 3.45  | 3      | 760.7    |
| 226246610   | Alpha-mannosidase 2                                   | 3        | FAVESLVPSSLSLMHSPPDAQNMS EVSLSPMEISTFR | Deamidated(22)Oxidation(14)Oxidation(23)Oxidation(31) | 5.27  | 3      | 1357.3   |
| 111607447   | Integrin beta                                         | 2        | VTLYLRPGQAAAFNVTFR                     | Deamidated(14)                                        | 3.34  | 3      | 675.7    |
| 755522163   | Integrin alpha-M                                      | 8        | AFFDETKNNTR                            | Deamidated(8)                                         | 3.01  | 2      | 672.3    |
| 568926396   | Tenascin                                              | 12       | ESGLNMTLPEENQPVVFNHIYNIK               | Deamidated(12)Deamidated(18)Oxidation(6):Carbamyl     | 4.42  | 3      | 934.8    |

14 Supplemental Table S2

| MH+ [Da] | RT [min] | PSM | WT-1     | WT-2     | WT-3     | WT-4     | WT-5     | WT-5-2   | WT-6     | WT-7     | WT-8     | Null-1   | Null-2   |
|----------|----------|-----|----------|----------|----------|----------|----------|----------|----------|----------|----------|----------|----------|
| 1912.9   | 34.0     | 18  | 5.42E+05 | 2.64E+05 | 4.31E+05 | 1.80E+05 | 6.78E+05 | 6.41E+05 | 1.70E+05 | 2.33E+05 | 1.91E+05 | 2.30E+05 | 2.32E+05 |
| 1434.8   | 61.7     | 18  | 2.64E+05 | 4.60E+05 | 6.09E+05 | 2.03E+05 | 6.14E+05 | 5.29E+05 | 1.40E+05 | 4.24E+05 | 2.40E+05 | 1.12E+05 | 3.26E+05 |
| 2375.1   | 38.1     | 11  | 3.75E+05 | 4.47E+05 | 5.35E+05 | 3.01E+05 | 6.65E+05 | 6.50E+05 | 2.93E+05 | 4.05E+05 | 3.30E+05 | 2.30E+05 | 3.83E+05 |
| 2602.2   | 37.2     | 2   | 3.08E+04 | 9.25E+04 | 1.33E+05 | 5.60E+04 | 1.50E+05 | 1.27E+05 | 1.10E+05 | 8.44E+04 | 7.68E+04 | 2.43E+04 | 4.68E+04 |
| 3800.9   | 63.5     | 22  | 2.33E+05 | 2.51E+05 | 4.16E+05 | 7.82E+04 | 4.31E+05 | 4.15E+05 | 1.96E+04 | 2.39E+05 | 8.32E+04 | 5.30E+04 | 1.39E+05 |
| 2506.1   | 32.7     | 7   | 7.66E+04 | 1.13E+05 | 1.12E+05 | 4.10E+04 | 2.00E+05 | 1.80E+05 | 8.70E+04 | 2.02E+05 | 3.85E+04 | 5.38E+04 | 1.33E+05 |
| 3364.7   | 56.5     | 205 | 3.83E+06 | 4.85E+06 | 6.98E+06 | 3.96E+06 | 9.60E+06 | 8.08E+06 | 1.79E+05 | 5.46E+06 | 1.41E+06 | 1.85E+06 | 5.16E+06 |
| 1225.6   | 17.6     | 2   | 1.18E+05 | 2.56E+04 | 6.52E+04 | 1.75E+01 | 1.78E+05 | 9.24E+04 | 7.73E+04 | 1.75E+04 | 2.36E+04 | 6.96E+03 | 4.34E+04 |
| 987.6    | 41.0     | 7   | 1.34E+05 | 1.96E+05 | 2.38E+05 | 8.58E+04 | 2.68E+05 | 2.29E+05 | 1.36E+05 | 1.46E+05 | 1.17E+05 | 7.23E+04 | 1.68E+05 |
| 1673.9   | 36.1     | 13  | 3.12E+05 | 2.13E+05 | 4.31E+05 | 2.05E+05 | 6.91E+05 | 6.23E+05 | 1.24E+05 | 1.82E+05 | 1.86E+05 | 2.23E+05 | 1.39E+05 |
| 1482.8   | 40.5     | 6   | 8.28E+04 | 1.03E+05 | 1.66E+05 | 6.73E+04 | 1.88E+05 | 1.87E+05 | 4.92E+04 | 1.12E+05 | 4.49E+04 | 5.50E+04 | 8.71E+04 |
| 3018.5   | 61.4     | 9   | 6.49E+04 | 9.61E+04 | 1.89E+05 | 2.80E+04 | 1.68E+05 | 1.62E+05 | 1.54E+04 | 1.02E+05 | 3.02E+04 | 1.15E+04 | 1.16E+05 |
| 1173.6   | 34.2     | 50  | 1.98E+05 | 3.34E+05 | 4.82E+05 | 1.08E+05 | 3.36E+05 | 2.84E+05 | 2.69E+05 | 1.83E+05 | 1.72E+05 | 7.82E+04 | 1.83E+05 |
| 2869.4   | 42.9     | 3   | 9.37E+04 | 1.16E+05 | 1.50E+05 | 6.20E+04 | 1.45E+05 | 1.85E+05 | 1.93E+04 | 1.10E+05 | 3.06E+04 | 3.43E+04 | 1.26E+05 |
| 1351.7   | 45.7     | 21  | 1.72E+06 | 1.82E+06 | 1.89E+06 | 1.56E+06 | 2.53E+06 | 2.45E+06 | 9.92E+05 | 1.64E+06 | 1.10E+06 | 8.44E+05 | 1.36E+06 |
| 2812.4   | 60.9     | 22  | 2.25E+05 | 1.30E+05 | 5.28E+05 | 1.59E+05 | 5.85E+05 | 4.89E+05 | 2.86E+04 | 2.92E+05 | 5.10E+04 | 4.07E+04 | 1.05E+05 |
| 1424.7   | 29.6     | 55  | 1.19E+06 | 7.20E+05 | 1.02E+06 | 5.39E+05 | 1.17E+06 | 1.18E+06 | 5.57E+05 | 6.94E+05 | 4.24E+05 | 3.46E+05 | 6.98E+05 |
| 1194.5   | 17.5     | 3   | 1.38E+05 | 1.10E+05 | 1.47E+05 | 1.51E+02 | 2.81E+05 | 1.62E+03 | 1.25E+05 | 8.78E+04 | 2.13E+04 | 4.28E+04 | 5.07E+04 |
| 2626.4   | 50.6     | 12  | 1.28E+05 | 1.43E+05 | 2.06E+05 | 4.80E+04 | 2.77E+05 | 2.85E+05 | 4.15E+04 | 1.58E+05 | 5.31E+04 | 5.17E+04 | 1.62E+05 |
| 1404.7   | 23.3     | 63  | 5.18E+05 | 5.60E+05 | 7.77E+05 | 1.13E+04 | 6.59E+05 | 5.75E+05 | 5.07E+05 | 4.14E+05 | 2.71E+05 | 1.60E+05 | 3.09E+05 |
| 2750.5   | 62.0     | 12  | 1.03E+05 | 1.22E+05 | 2.64E+05 | 9.68E+04 | 1.02E+05 | 1.08E+05 | 2.89E+04 | 1.23E+05 | 3.49E+04 | 2.65E+04 | 5.66E+04 |
| 2202.1   | 43.9     | 11  | 1.48E+05 | 2.27E+05 | 2.61E+05 | 7.59E+04 | 3.08E+05 | 3.29E+05 | 1.30E+05 | 1.74E+05 | 1.22E+05 | 9.11E+04 | 1.62E+05 |
| 1723.8   | 38.3     | 17  | 2.03E+05 | 1.86E+05 | 2.13E+05 | 9.57E+04 | 2.34E+05 | 2.26E+05 | 1.58E+05 | 1.24E+05 | 7.62E+04 | 6.40E+04 | 1.25E+05 |
| 2280.0   | 51.6     | 23  | 1.71E+05 | 3.13E+05 | 2.48E+05 | 1.05E+05 | 5.00E+05 | 4.46E+05 | 1.31E+05 | 2.32E+05 | 1.14E+05 | 8.28E+04 | 1.64E+05 |
| 4069.9   | 56.9     | 20  | 6.86E+05 | 8.36E+05 | 1.10E+06 | 4.46E+05 | 1.24E+06 | 9.21E+05 | 1.09E+05 | 7.83E+05 | 3.38E+05 | 2.11E+05 | 6.43E+05 |
| 2025.1   | 49.0     | 17  | 2.64E+05 | 4.85E+05 | 6.17E+05 | 3.43E+05 | 3.70E+05 | 3.73E+05 | 5.43E+04 | 4.57E+05 | 1.65E+05 | 4.69E+04 | 3.54E+05 |
| 1343.6   | 26.7     | 26  | 4.13E+05 | 3.68E+05 | 5.13E+05 | 7.94E+02 | 4.47E+05 | 3.57E+05 | 3.50E+05 | 2.56E+05 | 2.75E+05 | 1.17E+05 | 2.28E+05 |
| 2802.4   | 46.2     | 198 | 1.21E+05 | 1.00E+05 | 3.13E+05 | 2.32E+05 | 3.80E+05 | 1.91E+05 | 5.17E+04 | 2.98E+05 | 6.85E+04 | 1.06E+05 | 1.94E+05 |

14 Supplemental Table S2



| Null-3   | Null-4   | Null-5   | Null-6   | Null-7   | Null-8   | Ratio<br>Null/WT | SD       | p value  | N Ratio | N SD     | N p value | Avg_WT   | Avg_Null |
|----------|----------|----------|----------|----------|----------|------------------|----------|----------|---------|----------|-----------|----------|----------|
| 1.87E+05 | 2.27E+05 | 2.85E+05 | 4.35E+05 | 3.04E+05 | 2.26E+05 | 0.72             | 6.10E-01 | 1.89E-01 | 0.96    | 6.34E-01 | 8.24E-01  | 2.06E+05 | 1.99E+05 |
| 2.50E+05 | 2.25E+05 | 2.75E+05 | 4.46E+05 | 3.87E+05 | 3.46E+05 | 0.76             | 6.24E-01 | 2.18E-01 | 0.96    | 6.41E-01 | 8.23E-01  | 2.24E+05 | 2.16E+05 |
| 2.19E+05 | 3.58E+05 | 2.98E+05 | 4.56E+05 | 3.83E+05 | 3.56E+05 | 0.75             | 4.24E-01 | 7.09E-02 | 0.96    | 4.01E-01 | 7.21E-01  | 2.58E+05 | 2.49E+05 |
| 4.74E+04 | 5.53E+04 | 8.02E+04 | 8.76E+04 | 6.74E+04 | 1.86E+05 | 0.78             | 8.31E-01 | 3.47E-01 | 0.96    | 8.71E-01 | 8.67E-01  | 5.56E+04 | 5.35E+04 |
| 9.15E+04 | 1.74E+05 | 1.41E+05 | 3.30E+05 | 3.16E+05 | 2.08E+05 | 0.75             | 9.05E-01 | 3.64E-01 | 0.96    | 9.54E-01 | 8.75E-01  | 1.35E+05 | 1.30E+05 |
| 3.68E+04 | 7.70E+04 | 8.25E+04 | 1.20E+05 | 1.21E+05 | 8.62E+04 | 0.76             | 7.08E-01 | 2.75E-01 | 0.96    | 8.44E-01 | 8.63E-01  | 6.75E+04 | 6.49E+04 |
| 1.44E+06 | 6.46E+06 | 1.27E+06 | 3.56E+06 | 4.84E+06 | 4.18E+06 | 0.73             | 8.37E-01 | 2.92E-01 | 0.96    | 1.00E+00 | 8.78E-01  | 2.74E+06 | 2.63E+06 |
| 2.51E+04 | 2.74E+04 | 5.96E+04 | 7.88E+04 | 4.87E+04 | 9.20E+04 | 0.72             | 1.05E+00 | 4.04E-01 | 0.96    | 1.20E+00 | 8.98E-01  | 3.54E+04 | 3.40E+04 |
| 1.03E+05 | 1.23E+05 | 1.01E+05 | 1.69E+05 | 1.56E+05 | 1.45E+05 | 0.75             | 4.80E-01 | 1.05E-01 | 0.96    | 4.42E-01 | 7.35E-01  | 9.95E+04 | 9.56E+04 |
| 2.58E+05 | 1.52E+05 | 1.52E+05 | 5.00E+05 | 2.93E+05 | 1.49E+05 | 0.71             | 8.14E-01 | 2.57E-01 | 0.96    | 8.98E-01 | 8.63E-01  | 1.82E+05 | 1.75E+05 |
| 7.42E+04 | 8.75E+04 | 4.86E+04 | 1.12E+05 | 8.70E+04 | 9.49E+04 | 0.73             | 5.57E-01 | 1.63E-01 | 0.96    | 5.69E-01 | 7.99E-01  | 6.24E+04 | 6.00E+04 |
| 4.35E+04 | 6.61E+04 | 4.95E+04 | 8.51E+04 | 1.24E+05 | 7.54E+04 | 0.75             | 9.13E-01 | 3.71E-01 | 0.96    | 1.01E+00 | 8.78E-01  | 5.32E+04 | 5.11E+04 |
| 2.16E+05 | 1.47E+05 | 1.71E+05 | 3.16E+05 | 2.88E+05 | 1.91E+05 | 0.75             | 6.12E-01 | 1.84E-01 | 0.96    | 6.51E-01 | 8.10E-01  | 1.52E+05 | 1.46E+05 |
| 4.58E+04 | 8.80E+04 | 2.91E+04 | 1.05E+05 | 9.84E+04 | 7.59E+04 | 0.74             | 7.60E-01 | 2.66E-01 | 0.96    | 8.59E-01 | 8.55E-01  | 5.70E+04 | 5.48E+04 |
| 8.96E+05 | 1.31E+06 | 1.01E+06 | 1.72E+06 | 1.89E+06 | 1.50E+06 | 0.75             | 4.44E-01 | 7.07E-02 | 0.96    | 3.68E-01 | 6.72E-01  | 1.01E+06 | 9.66E+05 |
| 8.06E+04 | 1.68E+05 | 2.19E+05 | 3.68E+05 | 4.30E+05 | 2.12E+05 | 0.73             | 1.05E+00 | 4.02E-01 | 0.96    | 1.19E+00 | 8.90E-01  | 1.50E+05 | 1.43E+05 |
| 4.75E+05 | 6.09E+05 | 5.02E+05 | 8.49E+05 | 7.32E+05 | 7.12E+05 | 0.74             | 4.71E-01 | 8.91E-02 | 0.96    | 4.11E-01 | 6.95E-01  | 4.73E+05 | 4.54E+05 |
| 3.59E+04 | 8.76E+04 | 4.60E+04 | 1.29E+05 | 1.16E+05 | 8.18E+04 | 0.73             | 9.86E-01 | 4.08E-01 | 0.96    | 1.06E+00 | 8.79E-01  | 5.58E+04 | 5.34E+04 |
| 5.42E+04 | 9.06E+04 | 8.56E+04 | 1.60E+05 | 1.43E+05 | 1.32E+05 | 0.74             | 7.68E-01 | 2.90E-01 | 0.96    | 7.94E-01 | 8.31E-01  | 8.33E+04 | 7.96E+04 |
| 2.03E+05 | 3.98E+05 | 2.94E+05 | 5.60E+05 | 4.77E+05 | 5.03E+05 | 0.76             | 6.63E-01 | 2.31E-01 | 0.96    | 6.60E-01 | 7.93E-01  | 2.76E+05 | 2.63E+05 |
| 4.75E+04 | 4.46E+04 | 8.90E+04 | 1.72E+05 | 1.14E+05 | 1.15E+05 | 0.76             | 9.16E-01 | 3.73E-01 | 0.96    | 1.01E+00 | 8.62E-01  | 6.22E+04 | 5.94E+04 |
| 1.20E+05 | 1.13E+05 | 1.55E+05 | 2.26E+05 | 1.69E+05 | 1.29E+05 | 0.74             | 5.45E-01 | 1.45E-01 | 0.95    | 5.46E-01 | 7.52E-01  | 1.13E+05 | 1.08E+05 |
| 8.84E+04 | 1.08E+05 | 1.05E+05 | 1.84E+05 | 1.36E+05 | 1.83E+05 | 0.74             | 5.09E-01 | 9.41E-02 | 0.95    | 4.38E-01 | 6.77E-01  | 9.52E+04 | 9.08E+04 |
| 1.24E+05 | 1.70E+05 | 1.59E+05 | 3.16E+05 | 2.54E+05 | 2.09E+05 | 0.74             | 7.14E-01 | 2.46E-01 | 0.95    | 7.02E-01 | 7.83E-01  | 1.42E+05 | 1.34E+05 |
| 4.37E+05 | 3.94E+05 | 4.02E+05 | 8.17E+05 | 7.00E+05 | 6.83E+05 | 0.75             | 6.65E-01 | 2.21E-01 | 0.95    | 6.73E-01 | 7.70E-01  | 4.10E+05 | 3.89E+05 |
| 2.09E+05 | 1.46E+05 | 2.05E+05 | 4.90E+05 | 3.19E+05 | 3.83E+05 | 0.77             | 7.90E-01 | 3.19E-01 | 0.95    | 8.95E-01 | 8.20E-01  | 2.03E+05 | 1.93E+05 |
| 2.58E+05 | 2.20E+05 | 2.01E+05 | 3.77E+05 | 2.81E+05 | 3.26E+05 | 0.76             | 5.78E-01 | 1.81E-01 | 0.95    | 6.19E-01 | 7.47E-01  | 1.95E+05 | 1.85E+05 |
| 7.35E+04 | 2.42E+05 | 1.41E+05 | 8.77E+04 | 8.33E+04 | 1.72E+05 | 0.70             | 7.36E-01 | 2.21E-01 | 0.95    | 9.77E-01 | 8.32E-01  | 1.10E+05 | 1.04E+05 |

14 Supplemental Table S2

| Accession # | Protein                                             | # of Pep | PEPTIDE                        | Modification                            | XCorr | Charge | m/z [Da] |
|-------------|-----------------------------------------------------|----------|--------------------------------|-----------------------------------------|-------|--------|----------|
| 568954605   | Macrophage scavenger receptor 1                     | 3        | FQNFSMATDQR                    | Deamidated(3)Oxidation(6)               | 2.69  | 2      | 681.3    |
| 157057166   | Toll-like receptor 9                                | 5        | VTPGALLGLSNLTHLSLK             | Deamidated(11)                          | 3.71  | 3      | 612.4    |
| 37674242    | Bone marrow stromal antigen 2                       | 2        | TQDSSLQAETQANSCNLTVVTLQESLEK   | Carbamidomethyl(15)Deamidated(16)       | 6.64  | 3      | 1041.2   |
| 568991301   | Plexin B2                                           | 10       | SINVTGQGFSLIQK                 | Deamidated(3)                           | 3.72  | 2      | 746.9    |
| 13173473    | Major prion protein                                 | 2        | YPNQVYYRPVDQYSNQNNFVHDCVNITIK  | Carbamidomethyl(23)Deamidated(17)       | 8.31  | 4      | 898.2    |
| 568941322   | Tapasin-related protein                             | 1        | AGNASLTLPLNLTLLK               | Deamidated(3)                           | 3.26  | 2      | 707.4    |
| 208609939   | Receptor-type tyrosine phosphatase                  | 2        | GPDGTEGLSSTVNGSTDPSAVTDIR      | Deamidated(13)                          | 5.63  | 3      | 812.0    |
| 568935338   | Iduronidase                                         | 2        | FQVNNTHPPHVQLLR                | Deamidated(4)                           | 3.72  | 4      | 451.0    |
| 148747408   | Laminin subunit alpha-4                             | 7        | RPASNISASIQR                   | Deamidated(5)                           | 4.46  | 3      | 434.2    |
| 153791270   | Laminin subunit gamma-1                             | 12       | VNSSLHSQISR                    | Deamidated(2)                           | 3.9   | 2      | 614.8    |
| 9790019     | Acid ceramidase                                     | 2        | SVLENTTSYEEAKNTLTK             | Deamidated(5)Deamidated(14)             | 3.92  | 3      | 677.3    |
| 84042523    | Lysosomal protective protein                        | 3        | MYVTNDTEVAENNYEALK             | Deamidated(5)Deamidated(12)Oxidation(1) | 5.03  | 2      | 1061.0   |
| 153791389   | Integrin alpha-1                                    | 13       | GELQSENSSLTLSSSNR              | Deamidated(7)                           | 4.79  | 2      | 905.4    |
| 568994656   | Leukocyte surface antigen CD47                      | 3        | SYIFIYDGNKNSTTTDQNFSAK         | Deamidated(11)Deamidated(18)            | 7.43  | 3      | 873.1    |
| 568958972   | Neural cell adhesion molecule 1                     | 2        | IYNTPSASYLEVTPDSENDGNYNCTAVNR  | Carbamidomethyl(25)Deamidated(24)       | 6.32  | 3      | 1138.2   |
| 115292433   | Heparan-alpha-glucosaminidase N-acetyltransferase   | 1        | FGEFGNYLLVQHASSGANK            | Deamidated(6)                           | 6.16  | 3      | 709.7    |
| 84781760    | P2X purinoceptor 7                                  | 2        | GIAEVTENVTEGGVTK               | Deamidated(8)                           | 4.62  | 2      | 802.9    |
| 168693641   | SUN domain-containing protein 2                     | 1        | ALSPNSTISSAPK                  | Deamidated(5)                           | 3.39  | 2      | 637.3    |
| 10946646    | Integrin alpha-X                                    | 1        | YLNFTSEK                       | Deamidated(3)                           | 2.59  | 2      | 545.3    |
| 755498552   | Lysosomal acid phosphatase                          | 1        | YHGFLNTSYHR                    | Deamidated(6)                           | 2.8   | 2      | 698.3    |
| 31791059    | CD166 antigen                                       | 3        | IIISPEENVTLTCTAENQLER          | Carbamidomethyl(13)Deamidated(8)        | 3.45  | 3      | 811.1    |
| 568986527   | Bone morphogenetic protein 1                        | 1        | IILNFTSMDLYR                   | Deamidated(4)Oxidation(8)               | 2.66  | 2      | 751.9    |
| 240255600   | Von Willebrand factor A domain-containing protein 1 | 1        | VEVPAGQNSTTVQGLTPCTTYLVTVTAAFR | Carbamidomethyl(18)Deamidated(8)        | 5.81  | 3      | 1061.5   |
| 568991244   | Collagen alpha-1(XIV) chain                         | 4        | AIIQGLLPEQNYTVQLIAYYK          | Deamidated(11)                          | 3.23  | 2      | 1220.2   |
| 226437629   | Embigin                                             | 4        | DDEPLETTGDFNTTK                | Deamidated(12)                          | 3.94  | 2      | 842.4    |
| 6754900     | 5'-nucleotidase                                     | 3        | VEFDDKGNVITSYGNPILLNSSIPEDATIK | Deamidated(20)                          | 7.79  | 3      | 1084.2   |
| 568926396   | Tenascin                                            | 12       | YRLNYSLPTGQSMEVQLPK            | Deamidated(4)Oxidation(13)              | 3.92  | 3      | 747.7    |
| 755526718   | Piezo-type mechanosensitive ion channel component 1 | 1        | QELYNGTADITLR                  | Deamidated(5)                           | 3.81  | 2      | 747.9    |
| 6679389     | Plexin-A1                                           | 2        | YNYTEDPTILR                    | Deamidated(2)                           | 2.82  | 2      | 693.3    |

| MH+ [Da] | RT [min] | PSM | WT-1     | WT-2     | WT-3     | WT-4     | WT-5     | WT-5-2   | WT-6     | WT-7     | WT-8     | Null-1   | Null-2   |
|----------|----------|-----|----------|----------|----------|----------|----------|----------|----------|----------|----------|----------|----------|
| 1361.6   | 28.5     | 29  | 7.49E+05 | 9.92E+05 | 1.09E+06 | 4.43E+05 | 1.19E+06 | 1.03E+06 | 1.01E+06 | 6.23E+05 | 4.37E+05 | 2.74E+05 | 5.65E+05 |
| 1835.1   | 57.0     | 10  | 1.64E+05 | 1.94E+05 | 3.13E+05 | 1.07E+05 | 3.46E+05 | 2.46E+05 | 5.03E+04 | 2.23E+05 | 4.69E+04 | 2.92E+04 | 2.59E+05 |
| 3121.5   | 56.7     | 20  | 3.10E+05 | 3.85E+05 | 5.11E+05 | 1.88E+05 | 5.68E+05 | 4.89E+05 | 5.79E+04 | 2.72E+05 | 8.62E+04 | 6.30E+04 | 4.71E+05 |
| 1492.8   | 46.1     | 16  | 5.46E+05 | 8.70E+05 | 1.16E+06 | 3.12E+05 | 1.20E+06 | 1.13E+06 | 4.62E+05 | 6.18E+05 | 3.16E+05 | 2.84E+05 | 6.87E+05 |
| 3589.7   | 41.8     | 10  | 1.33E+05 | 1.46E+05 | 3.28E+05 | 8.12E+04 | 2.78E+05 | 3.14E+05 | 8.47E+04 | 1.13E+05 | 7.18E+04 | 1.19E+05 | 1.26E+05 |
| 1413.8   | 49.2     | 14  | 1.19E+05 | 1.10E+05 | 1.93E+05 | 7.18E+04 | 2.19E+05 | 2.38E+05 | 9.86E+04 | 1.68E+05 | 6.57E+04 | 6.85E+04 | 1.55E+05 |
| 2434.1   | 40.9     | 11  | 1.13E+05 | 1.04E+05 | 1.26E+05 | 7.25E+04 | 1.62E+05 | 1.26E+05 | 5.60E+04 | 7.14E+04 | 5.21E+04 | 2.73E+04 | 7.09E+04 |
| 1800.9   | 34.0     | 14  | 1.16E+05 | 1.15E+05 | 2.11E+05 | 6.92E+04 | 2.64E+05 | 2.55E+05 | 1.00E+05 | 1.13E+05 | 8.27E+04 | 7.40E+04 | 1.19E+05 |
| 1300.7   | 23.3     | 26  | 6.15E+05 | 5.21E+05 | 1.00E+06 | 0.00E+00 | 1.58E+06 | 1.39E+06 | 9.07E+05 | 6.02E+05 | 3.01E+05 | 3.30E+05 | 6.14E+05 |
| 1228.6   | 20.6     | 69  | 4.23E+06 | 3.25E+06 | 5.55E+06 | 0.00E+00 | 9.15E+06 | 7.72E+06 | 5.21E+06 | 3.49E+06 | 1.67E+06 | 1.90E+06 | 3.34E+06 |
| 2030.0   | 31.3     | 1   | 2.15E+05 | 1.69E+05 | 2.90E+05 | 1.16E+05 | 3.36E+05 | 2.93E+05 | 8.98E+04 | 1.77E+05 | 1.09E+05 | 1.00E+05 | 8.86E+04 |
| 2120.9   | 37.2     | 42  | 2.79E+05 | 3.35E+05 | 2.33E+05 | 1.59E+05 | 4.78E+05 | 5.04E+05 | 2.47E+05 | 2.43E+05 | 4.11E+05 | 1.78E+05 | 2.39E+05 |
| 1809.8   | 31.8     | 32  | 7.86E+05 | 9.08E+05 | 1.19E+06 | 4.54E+05 | 1.28E+06 | 1.07E+06 | 6.26E+05 | 6.30E+05 | 3.88E+05 | 3.28E+05 | 6.67E+05 |
| 2617.2   | 41.7     | 60  | 1.68E+06 | 1.84E+06 | 2.43E+06 | 1.18E+06 | 3.51E+06 | 3.18E+06 | 1.12E+06 | 2.29E+06 | 9.88E+05 | 8.73E+05 | 2.18E+06 |
| 3412.5   | 49.0     | 11  | 1.48E+05 | 3.21E+05 | 3.90E+05 | 2.04E+05 | 2.65E+05 | 2.60E+05 | 1.40E+05 | 2.08E+05 | 2.33E+05 | 1.13E+05 | 1.78E+05 |
| 2127.0   | 45.2     | 12  | 4.04E+05 | 4.71E+05 | 6.75E+05 | 2.64E+05 | 6.50E+05 | 5.76E+05 | 2.59E+05 | 4.72E+05 | 2.75E+05 | 1.90E+05 | 4.18E+05 |
| 1604.8   | 38.3     | 17  | 3.88E+05 | 4.60E+05 | 5.32E+05 | 2.21E+05 | 4.47E+05 | 4.24E+05 | 3.07E+05 | 3.15E+05 | 1.97E+05 | 1.48E+05 | 3.14E+05 |
| 1273.7   | 28.4     | 41  | 2.09E+06 | 1.75E+06 | 2.79E+06 | 1.05E+06 | 4.51E+06 | 3.82E+06 | 1.81E+06 | 2.08E+06 | 1.24E+06 | 1.03E+06 | 1.86E+06 |
| 1089.5   | 31.7     | 2   | 7.75E+04 | 9.54E+04 | 1.26E+05 | 3.35E+04 | 1.56E+05 | 1.52E+05 | 6.68E+04 | 8.95E+04 | 3.64E+04 | 4.45E+04 | 7.48E+04 |
| 1395.6   | 27.9     | 16  | 2.91E+05 | 2.46E+05 | 3.42E+05 | 4.62E+02 | 4.33E+05 | 3.29E+05 | 2.11E+05 | 1.99E+05 | 1.28E+05 | 1.04E+05 | 1.98E+05 |
| 2431.2   | 49.8     | 13  | 1.78E+05 | 1.62E+05 | 3.72E+05 | 2.52E+05 | 6.31E+05 | 7.46E+05 | 1.17E+05 | 4.48E+05 | 1.55E+05 | 1.87E+05 | 2.88E+05 |
| 1502.8   | 52.4     | 24  | 1.10E+06 | 2.03E+06 | 2.82E+06 | 1.39E+06 | 2.12E+06 | 1.94E+06 | 3.90E+05 | 1.68E+06 | 1.07E+06 | 5.17E+05 | 1.64E+06 |
| 3182.6   | 62.7     | 15  | 7.07E+04 | 8.45E+04 | 1.84E+05 | 6.24E+04 | 1.60E+05 | 1.27E+05 | 1.43E+04 | 6.85E+04 | 3.94E+04 | 2.46E+04 | 9.22E+04 |
| 2439.3   | 63.3     | 25  | 2.36E+05 | 2.81E+05 | 7.14E+05 | 2.71E+05 | 4.95E+05 | 2.99E+05 | 9.05E+04 | 5.39E+05 | 8.95E+04 | 4.30E+04 | 1.34E+05 |
| 1683.7   | 37.2     | 9   | 7.59E+04 | 1.13E+05 | 1.05E+05 | 6.47E+04 | 9.14E+04 | 9.88E+04 | 1.23E+05 | 1.02E+05 | 1.06E+05 | 2.51E+04 | 3.64E+04 |
| 3250.6   | 54.8     | 16  | 4.35E+05 | 5.91E+05 | 1.30E+06 | 5.89E+05 | 1.33E+06 | 1.22E+06 | 1.77E+05 | 9.30E+05 | 6.81E+05 | 3.25E+05 | 1.11E+06 |
| 2241.1   | 42.2     | 4   | 9.36E+04 | 2.56E+04 | 6.25E+04 | 1.02E+05 | 1.83E+05 | 1.60E+05 | 2.52E+03 | 6.80E+04 | 4.93E+04 | 7.22E+04 | 2.00E+04 |
| 1494.7   | 40.2     | 6   | 6.78E+05 | 9.04E+05 | 7.42E+05 | 2.11E+05 | 8.88E+05 | 8.01E+05 | 4.88E+05 | 4.10E+05 | 1.66E+05 | 2.02E+05 | 4.09E+05 |
| 1385.7   | 39.1     | 13  | 1.69E+05 | 1.99E+05 | 2.39E+05 | 1.25E+05 | 2.06E+05 | 1.95E+05 | 1.46E+05 | 1.40E+05 | 1.19E+05 | 6.92E+04 | 1.35E+05 |

14 Supplemental Table S2

| Null-3   | Null-4   | Null-5   | Null-6   | Null-7   | Null-8   | Ratio<br>Null/WT | SD       | p value  | N Ratio | N SD     | N p value | Avg_WT   | Avg_Null |
|----------|----------|----------|----------|----------|----------|------------------|----------|----------|---------|----------|-----------|----------|----------|
| 6.64E+05 | 4.44E+05 | 5.11E+05 | 1.02E+06 | 7.86E+05 | 6.66E+05 | 0.73             | 5.16E-01 | 9.06E-02 | 0.95    | 5.06E-01 | 6.82E-01  | 4.79E+05 | 4.53E+05 |
| 6.32E+04 | 1.17E+05 | 1.16E+05 | 1.77E+05 | 1.86E+05 | 1.60E+05 | 0.74             | 8.09E-01 | 2.82E-01 | 0.95    | 9.20E-01 | 8.20E-01  | 1.05E+05 | 9.94E+04 |
| 1.41E+05 | 1.95E+05 | 1.68E+05 | 2.31E+05 | 2.40E+05 | 3.38E+05 | 0.72             | 8.15E-01 | 2.67E-01 | 0.95    | 9.19E-01 | 8.18E-01  | 1.77E+05 | 1.67E+05 |
| 3.80E+05 | 4.99E+05 | 4.27E+05 | 6.98E+05 | 6.41E+05 | 6.52E+05 | 0.73             | 5.73E-01 | 1.58E-01 | 0.95    | 5.40E-01 | 7.10E-01  | 4.14E+05 | 3.91E+05 |
| 7.74E+04 | 9.74E+04 | 9.61E+04 | 2.10E+05 | 1.02E+05 | 1.37E+05 | 0.70             | 6.62E-01 | 2.01E-01 | 0.95    | 7.15E-01 | 7.72E-01  | 9.52E+04 | 9.00E+04 |
| 5.68E+04 | 9.81E+04 | 1.01E+05 | 1.12E+05 | 1.25E+05 | 1.15E+05 | 0.73             | 5.46E-01 | 1.34E-01 | 0.95    | 5.67E-01 | 7.14E-01  | 8.12E+04 | 7.67E+04 |
| 6.70E+04 | 7.04E+04 | 5.82E+04 | 1.07E+05 | 9.37E+04 | 7.69E+04 | 0.73             | 5.18E-01 | 9.71E-02 | 0.94    | 4.78E-01 | 6.48E-01  | 5.55E+04 | 5.24E+04 |
| 8.25E+04 | 8.60E+04 | 1.09E+05 | 1.35E+05 | 1.13E+05 | 1.22E+05 | 0.71             | 5.09E-01 | 1.37E-01 | 0.94    | 4.52E-01 | 6.63E-01  | 8.28E+04 | 7.81E+04 |
| 4.44E+05 | 5.08E+05 | 4.77E+05 | 8.10E+05 | 5.42E+05 | 5.79E+05 | 0.70             | 6.42E-01 | 2.20E-01 | 0.94    | 6.43E-01 | 7.50E-01  | 4.24E+05 | 3.99E+05 |
| 2.75E+06 | 2.99E+06 | 2.48E+06 | 4.67E+06 | 3.38E+06 | 3.62E+06 | 0.70             | 6.31E-01 | 2.10E-01 | 0.94    | 6.18E-01 | 7.39E-01  | 2.47E+06 | 2.33E+06 |
| 1.49E+05 | 1.07E+05 | 1.38E+05 | 2.37E+05 | 2.08E+05 | 1.17E+05 | 0.72             | 5.91E-01 | 1.35E-01 | 0.94    | 6.03E-01 | 7.02E-01  | 1.13E+05 | 1.06E+05 |
| 2.01E+05 | 2.96E+05 | 1.43E+05 | 3.50E+05 | 2.56E+05 | 3.13E+05 | 0.77             | 5.07E-01 | 1.39E-01 | 0.94    | 6.73E-01 | 7.50E-01  | 1.95E+05 | 1.83E+05 |
| 4.79E+05 | 5.56E+05 | 5.43E+05 | 8.20E+05 | 7.16E+05 | 5.74E+05 | 0.72             | 4.67E-01 | 7.86E-02 | 0.94    | 4.14E-01 | 5.89E-01  | 4.61E+05 | 4.33E+05 |
| 9.87E+05 | 1.26E+06 | 1.42E+06 | 1.67E+06 | 1.82E+06 | 1.54E+06 | 0.73             | 5.37E-01 | 1.26E-01 | 0.94    | 5.35E-01 | 6.73E-01  | 1.15E+06 | 1.08E+06 |
| 6.92E+04 | 1.61E+05 | 1.80E+05 | 2.66E+05 | 3.36E+05 | 1.96E+05 | 0.78             | 6.03E-01 | 1.97E-01 | 0.94    | 6.78E-01 | 7.29E-01  | 1.44E+05 | 1.35E+05 |
| 2.96E+05 | 2.94E+05 | 2.64E+05 | 4.70E+05 | 3.75E+05 | 3.36E+05 | 0.73             | 4.64E-01 | 8.04E-02 | 0.94    | 4.66E-01 | 6.25E-01  | 2.60E+05 | 2.45E+05 |
| 1.81E+05 | 2.62E+05 | 2.63E+05 | 3.39E+05 | 3.16E+05 | 3.26E+05 | 0.73             | 4.20E-01 | 5.02E-02 | 0.94    | 3.89E-01 | 5.49E-01  | 2.11E+05 | 1.98E+05 |
| 1.44E+06 | 1.39E+06 | 1.64E+06 | 2.33E+06 | 2.10E+06 | 1.59E+06 | 0.71             | 5.27E-01 | 1.31E-01 | 0.94    | 4.74E-01 | 6.36E-01  | 1.32E+06 | 1.24E+06 |
| 3.27E+04 | 7.66E+04 | 5.71E+04 | 7.43E+04 | 9.03E+04 | 8.12E+04 | 0.72             | 5.63E-01 | 1.42E-01 | 0.94    | 5.47E-01 | 6.72E-01  | 5.21E+04 | 4.88E+04 |
| 1.31E+05 | 1.77E+05 | 1.54E+05 | 2.33E+05 | 1.94E+05 | 2.02E+05 | 0.72             | 5.54E-01 | 1.64E-01 | 0.94    | 5.16E-01 | 6.69E-01  | 1.38E+05 | 1.29E+05 |
| 2.24E+05 | 1.50E+05 | 1.63E+05 | 3.68E+05 | 2.68E+05 | 2.89E+05 | 0.71             | 6.94E-01 | 2.49E-01 | 0.94    | 7.54E-01 | 7.62E-01  | 1.92E+05 | 1.79E+05 |
| 1.60E+06 | 1.04E+06 | 7.57E+05 | 1.32E+06 | 1.30E+06 | 1.27E+06 | 0.73             | 5.65E-01 | 1.39E-01 | 0.94    | 7.01E-01 | 7.20E-01  | 9.42E+05 | 8.81E+05 |
| 4.52E+04 | 5.10E+04 | 4.67E+04 | 9.03E+04 | 8.92E+04 | 7.86E+04 | 0.72             | 7.34E-01 | 2.47E-01 | 0.93    | 7.45E-01 | 7.42E-01  | 5.01E+04 | 4.69E+04 |
| 9.50E+04 | 1.41E+05 | 1.89E+05 | 4.46E+05 | 5.80E+05 | 4.45E+05 | 0.77             | 1.08E+00 | 4.56E-01 | 0.93    | 1.21E+00 | 8.33E-01  | 1.91E+05 | 1.79E+05 |
| 4.81E+04 | 6.68E+04 | 8.34E+04 | 1.39E+05 | 1.25E+05 | 9.60E+04 | 0.79             | 5.69E-01 | 2.31E-01 | 0.93    | 7.63E-01 | 7.38E-01  | 5.98E+04 | 5.59E+04 |
| 2.95E+05 | 4.30E+05 | 4.47E+05 | 6.54E+05 | 9.77E+05 | 6.39E+05 | 0.76             | 7.56E-01 | 2.74E-01 | 0.93    | 8.19E-01 | 7.55E-01  | 4.72E+05 | 4.41E+05 |
| 6.94E+04 | 4.76E+04 | 1.99E+04 | 8.19E+04 | 1.31E+05 | 1.34E+04 | 0.69             | 9.71E-01 | 3.00E-01 | 0.93    | 1.13E+00 | 8.19E-01  | 4.60E+04 | 4.30E+04 |
| 3.08E+05 | 3.81E+05 | 2.92E+05 | 7.80E+05 | 5.33E+05 | 4.68E+05 | 0.72             | 6.46E-01 | 1.64E-01 | 0.93    | 6.84E-01 | 7.07E-01  | 3.29E+05 | 3.07E+05 |
| 1.33E+05 | 1.05E+05 | 9.31E+04 | 1.63E+05 | 1.82E+05 | 1.24E+05 | 0.73             | 3.91E-01 | 2.97E-02 | 0.93    | 3.94E-01 | 5.10E-01  | 9.95E+04 | 9.28E+04 |

14 Supplemental Table S2

| Accession # | Protein                                                          | # of Pep | PEPTIDE                            | Modification                                                      | XCorr | Charge | m/z [Da] |
|-------------|------------------------------------------------------------------|----------|------------------------------------|-------------------------------------------------------------------|-------|--------|----------|
| 568974274   | GPI transamidase component PIG-S                                 | 1        | IYNASELPVR                         | Deamidated(3)                                                     | 2.76  | 2      | 581.8    |
| 6680878     | Lysosome membrane protein 2                                      | 7        | TMVFPVMYLNESVLIDK                  | Deamidated(10)Oxidation(2)Oxidation(7)                            | 4.94  | 3      | 678.0    |
| 569000449   | Latent-transforming growth factor beta-binding protein 1         | 2        | GNTTTLISENGHAADTLTATNFR            | Deamidated(2)                                                     | 7.18  | 3      | 803.1    |
| 568915917   | Tyrosine-protein phosphatase non-receptor type substrate 1       | 5        | VTQQSPTSMNQVNLTCR                  | Carbamidomethyl(16)Deamidated(13)Oxidation(9)                     | 3.53  | 2      | 991.0    |
| 31542362    | ADP-ribosyl cyclase 1                                            | 3        | NSTFGSVEVFSLDPNK                   | Deamidated(1)                                                     | 4.21  | 2      | 871.4    |
| 6677905     | Golgi apparatus protein 1                                        | 3        | LNLTTDPK                           | Deamidated(2)                                                     | 2.81  | 2      | 451.7    |
| 568990242   | Oncostatin M receptor                                            | 3        | ITANNSMGASPESLMVLNSDSGHEVVK        | Deamidated(4)Deamidated(19)Oxidation(7)Oxidation(15)              | 3.13  | 3      | 951.1    |
| 112293269   | Integrin alpha 7                                                 | 3        | ALDSVEKPLCLSNDASASHVECELGNPMK      | Carbamidomethyl(10)Carbamidomethyl(21)Deamidated(13)Oxidation(27) | 4.79  | 3      | 1039.8   |
| 153792211   | Ectonucleotide pyrophosphatase/phosphodiesterase family member 1 | 3        | MNASFSLK                           | Deamidated(2)Oxidation(1)                                         | 2.54  | 2      | 457.7    |
| 146231960   | Chondroitin sulfate proteoglycan 4                               | 2        | YVHDGSETQTDAFVLLANASEMDR           | Deamidated(18)Oxidation(22)                                       | 6.7   | 3      | 896.1    |
| 47087146    | All-trans retinoic acid-induced differentiation factor isoform 1 | 1        | GTILGLDLQNCCLK                     | Carbamidomethyl(11)Deamidated(10)                                 | 3.9   | 2      | 766.9    |
| 568971832   | Integrin alpha-3                                                 | 2        | DLAVGDDYTNR                        | Deamidated(10)                                                    | 2.63  | 2      | 620.3    |
| 13384938    | Endoplasmic reticulum-Golgi intermediate compartment protein 3   | 2        | HLSFGEDYPGIVNPLDHTNVTAPQASMMFQYFVK | Deamidated(13)Deamidated(19)Oxidation(27)Oxidation(28)            | 8.34  | 4      | 972.5    |
| 227330580   | Platelet receptor Gi24 isoform 1                                 | 2        | VTPYSLYVCPEGQNALTCR                | Carbamidomethyl(10)Carbamidomethyl(20)Deamidated(15)              | 4.69  | 3      | 811.0    |
| 224967112   | coagulation factor XIII B chain                                  | 2        | TYENGSSVEYR                        | Deamidated(4)                                                     | 2.99  | 2      | 653.3    |
| 22094083    | CD48 antigen                                                     | 4        | ILEYNYNSTK                         | Deamidated(7)                                                     | 2.47  | 2      | 623.3    |
| 568920948   | Protocadherin Fat 4                                              | 3        | INATTGEIFNK                        | Deamidated(2)                                                     | 3.68  | 2      | 604.8    |
| 153791389   | Integrin alpha-1                                                 | 13       | AHFSSLNLTIR                        | Deamidated(7)                                                     | 3.17  | 3      | 420.6    |
| 569004755   | Nucleotide exchange factor SIL1                                  | 1        | FNSSSSSLEEK                        | Deamidated(2)                                                     | 2.88  | 2      | 608.3    |
| 84042523    | Lysosomal protective protein                                     | 3        | MYVTNDTEVAENNYEALKDFFR             | Deamidated(5)Deamidated(12)Oxidation(1)                           | 6.2   | 3      | 896.4    |
| 225735655   | prosaposin                                                       | 7        | TNSSFIQGFVDHVKEDCDR                | Carbamidomethyl(17)Deamidated(2)                                  | 6.94  | 3      | 752.3    |
| 568990242   | Oncostatin M receptor                                            | 3        | ITANNSMGASPESLMVLNSDSGHEVKEK       | Deamidated(5)Deamidated(19)Oxidation(7)Oxidation(15)              | 3.35  | 4      | 777.9    |
| 568956330   | Neuropilin-1                                                     | 2        | RGPECSQNYTAPTGVK                   | Carbamidomethyl(5)Deamidated(8)                                   | 4.64  | 3      | 627.0    |
| 22203763    | Carboxypeptidase E                                               | 1        | DLQGNPIANATISVDGIDHDVTSK           | Deamidated(9)                                                     | 5.51  | 3      | 851.4    |

| MH+ [Da] | RT [min] | PSM | WT-1     | WT-2     | WT-3     | WT-4     | WT-5     | WT-5-2   | WT-6     | WT-7     | WT-8     | Null-1   | Null-2   |
|----------|----------|-----|----------|----------|----------|----------|----------|----------|----------|----------|----------|----------|----------|
| 1162.6   | 35.6     | 14  | 9.56E+05 | 1.19E+06 | 1.68E+06 | 8.32E+05 | 1.76E+06 | 1.50E+06 | 8.50E+05 | 8.83E+05 | 5.23E+05 | 5.21E+05 | 8.64E+05 |
| 2032.0   | 58.5     | 62  | 1.30E+06 | 2.81E+06 | 3.44E+06 | 8.68E+05 | 4.17E+06 | 3.65E+06 | 8.13E+05 | 2.79E+06 | 1.13E+06 | 6.28E+05 | 2.92E+06 |
| 2407.1   | 41.1     | 78  | 1.45E+05 | 1.08E+05 | 6.15E+04 | 1.25E+05 | 1.92E+05 | 1.58E+05 | 4.83E+04 | 1.22E+05 | 3.88E+04 | 6.73E+04 | 1.41E+05 |
| 1980.9   | 27.0     | 22  | 2.40E+05 | 1.95E+05 | 2.84E+05 | 6.34E+03 | 2.86E+05 | 2.53E+05 | 1.93E+05 | 1.43E+05 | 9.12E+04 | 5.18E+04 | 1.84E+05 |
| 1741.8   | 55.8     | 14  | 4.66E+05 | 4.40E+05 | 6.35E+05 | 2.34E+05 | 6.19E+05 | 6.34E+05 | 2.89E+05 | 4.87E+05 | 3.91E+05 | 2.02E+05 | 4.21E+05 |
| 902.5    | 28.3     | 15  | 1.91E+06 | 1.79E+06 | 2.40E+06 | 1.07E+06 | 2.48E+06 | 2.11E+06 | 1.21E+06 | 1.51E+06 | 8.34E+05 | 6.28E+05 | 1.42E+06 |
| 2851.3   | 36.2     | 13  | 2.22E+05 | 5.50E+05 | 2.93E+05 | 1.22E+05 | 3.97E+05 | 3.18E+05 | 1.63E+05 | 3.37E+05 | 2.02E+05 | 2.05E+05 | 1.42E+05 |
| 3117.4   | 39.3     | 23  | 1.71E+05 | 1.71E+05 | 5.02E+05 | 8.25E+04 | 4.78E+05 | 4.05E+05 | 1.17E+05 | 1.66E+05 | 8.43E+04 | 8.46E+04 | 3.07E+05 |
| 914.4    | 28.7     | 7   | 6.99E+05 | 8.35E+05 | 9.85E+05 | 4.35E+05 | 8.68E+05 | 8.94E+05 | 4.60E+05 | 6.80E+05 | 2.95E+05 | 1.93E+05 | 5.81E+05 |
| 2686.2   | 48.8     | 18  | 4.65E+05 | 5.96E+05 | 7.61E+05 | 4.04E+05 | 1.01E+06 | 9.38E+05 | 2.22E+05 | 5.11E+05 | 4.34E+05 | 2.14E+05 | 5.14E+05 |
| 1532.8   | 50.8     | 5   | 7.02E+04 | 9.94E+04 | 1.56E+05 | 3.77E+04 | 1.81E+05 | 1.68E+05 | 5.84E+04 | 1.20E+05 | 4.59E+04 | 3.82E+04 | 1.26E+05 |
| 1239.5   | 30.9     | 3   | 7.14E+04 | 7.09E+04 | 3.75E+04 | 7.02E+04 | 1.61E+05 | 1.30E+05 | 9.91E+04 | 7.60E+04 | 6.04E+04 | 3.49E+04 | 5.59E+04 |
| 3886.8   | 54.2     | 20  | 7.78E+05 | 9.22E+05 | 1.33E+06 | 4.63E+05 | 1.31E+06 | 1.25E+06 | 6.84E+04 | 9.61E+05 | 4.10E+05 | 2.97E+05 | 7.68E+05 |
| 2431.1   | 46.0     | 1   | 8.57E+04 | 8.75E+04 | 1.35E+05 | 3.03E+04 | 1.02E+05 | 1.61E+05 | 3.56E+04 | 1.00E+05 | 3.38E+04 | 1.84E+04 | 1.13E+05 |
| 1305.6   | 23.5     | 17  | 3.28E+05 | 4.11E+05 | 4.93E+05 | 8.36E+03 | 7.52E+05 | 6.62E+05 | 3.90E+05 | 3.64E+05 | 1.86E+05 | 1.95E+05 | 2.80E+05 |
| 1245.6   | 30.6     | 7   | 9.66E+05 | 9.06E+05 | 1.02E+06 | 4.95E+05 | 1.02E+06 | 9.00E+05 | 6.94E+05 | 6.21E+05 | 3.85E+05 | 2.80E+05 | 5.62E+05 |
| 1208.6   | 34.8     | 8   | 6.38E+04 | 7.88E+04 | 1.02E+05 | 4.26E+04 | 1.28E+05 | 1.16E+05 | 4.95E+04 | 1.67E+05 | 4.02E+04 | 4.49E+04 | 1.12E+05 |
| 1259.7   | 37.4     | 14  | 2.88E+05 | 4.89E+05 | 6.45E+05 | 1.85E+05 | 6.57E+05 | 6.19E+05 | 1.68E+05 | 2.89E+05 | 1.74E+05 | 1.13E+05 | 3.95E+05 |
| 1215.5   | 21.5     | 2   | 1.32E+05 | 8.73E+04 | 1.22E+05 | 3.80E+04 | 2.55E+05 | 1.99E+05 | 1.05E+05 | 1.11E+05 | 5.03E+04 | 4.76E+04 | 9.96E+04 |
| 2687.2   | 53.1     | 39  | 1.03E+05 | 2.11E+05 | 3.34E+05 | 1.04E+05 | 2.63E+05 | 2.33E+05 | 4.43E+04 | 9.98E+04 | 1.39E+05 | 4.67E+04 | 1.08E+05 |
| 2255.0   | 44.9     | 25  | 5.44E+05 | 4.57E+05 | 1.05E+06 | 9.13E+04 | 1.27E+06 | 1.50E+06 | 2.36E+05 | 4.80E+05 | 2.09E+05 | 2.33E+05 | 5.43E+05 |
| 3108.4   | 32.5     | 5   | 9.41E+04 | 9.21E+04 | 1.21E+05 | 5.38E+04 | 1.82E+05 | 1.38E+05 | 6.25E+04 | 8.80E+04 | 4.38E+04 | 3.88E+04 | 6.20E+04 |
| 1878.9   | 27.0     | 15  | 2.41E+05 | 2.32E+05 | 3.57E+05 | 1.14E+05 | 4.97E+05 | 3.73E+05 | 2.41E+05 | 1.64E+05 | 1.21E+05 | 9.27E+04 | 2.35E+05 |
| 2552.2   | 50.8     | 7   | 3.82E+05 | 1.63E+05 | 7.21E+05 | 2.03E+05 | 9.01E+05 | 7.08E+05 | 7.86E+04 | 3.00E+05 | 2.19E+05 | 2.25E+05 | 3.68E+05 |

14 Supplemental Table S2

| Null-3   | Null-4   | Null-5   | Null-6   | Null-7   | Null-8   | Ratio<br>Null/WT | SD       | p value  | N Ratio | N SD     | N p value | Avg_WT   | Avg_Null |
|----------|----------|----------|----------|----------|----------|------------------|----------|----------|---------|----------|-----------|----------|----------|
| 5.04E+05 | 7.25E+05 | 8.09E+05 | 1.15E+06 | 1.01E+06 | 8.61E+05 | 0.71             | 4.65E-01 | 6.80E-02 | 0.93    | 3.89E-01 | 5.08E-01  | 6.37E+05 | 5.94E+05 |
| 1.16E+06 | 1.67E+06 | 1.24E+06 | 1.90E+06 | 2.02E+06 | 2.07E+06 | 0.73             | 7.10E-01 | 2.33E-01 | 0.93    | 7.76E-01 | 7.30E-01  | 1.34E+06 | 1.24E+06 |
| 8.38E+04 | 6.12E+04 | 4.98E+04 | 6.54E+04 | 7.64E+04 | 6.94E+04 | 0.69             | 5.78E-01 | 1.13E-01 | 0.93    | 7.01E-01 | 6.98E-01  | 6.25E+04 | 5.81E+04 |
| 7.28E+04 | 1.47E+05 | 1.10E+05 | 1.60E+05 | 1.68E+05 | 2.00E+05 | 0.73             | 6.47E-01 | 1.85E-01 | 0.93    | 6.46E-01 | 6.73E-01  | 1.07E+05 | 9.92E+04 |
| 3.61E+05 | 3.05E+05 | 3.45E+05 | 4.76E+05 | 3.08E+05 | 3.08E+05 | 0.73             | 4.07E-01 | 4.67E-02 | 0.93    | 5.14E-01 | 5.98E-01  | 2.76E+05 | 2.56E+05 |
| 9.08E+05 | 1.08E+06 | 1.20E+06 | 1.58E+06 | 1.65E+06 | 1.33E+06 | 0.72             | 4.51E-01 | 5.86E-02 | 0.93    | 3.91E-01 | 4.89E-01  | 9.69E+05 | 9.00E+05 |
| 3.29E+05 | 2.04E+05 | 1.51E+05 | 2.45E+05 | 2.26E+05 | 1.58E+05 | 0.72             | 5.39E-01 | 1.23E-01 | 0.93    | 8.26E-01 | 7.36E-01  | 1.73E+05 | 1.60E+05 |
| 9.55E+04 | 1.41E+05 | 1.45E+05 | 1.60E+05 | 1.96E+05 | 2.06E+05 | 0.69             | 7.78E-01 | 2.53E-01 | 0.93    | 8.54E-01 | 7.44E-01  | 1.32E+05 | 1.22E+05 |
| 2.73E+05 | 5.14E+05 | 3.92E+05 | 6.19E+05 | 8.16E+05 | 6.23E+05 | 0.73             | 5.55E-01 | 1.11E-01 | 0.93    | 5.47E-01 | 5.97E-01  | 3.91E+05 | 3.62E+05 |
| 2.89E+05 | 4.18E+05 | 4.53E+05 | 6.05E+05 | 5.10E+05 | 4.30E+05 | 0.72             | 5.30E-01 | 1.18E-01 | 0.92    | 5.25E-01 | 5.92E-01  | 3.42E+05 | 3.16E+05 |
| 4.90E+04 | 6.55E+04 | 6.84E+04 | 6.81E+04 | 8.03E+04 | 9.92E+04 | 0.71             | 6.42E-01 | 1.76E-01 | 0.92    | 6.87E-01 | 6.77E-01  | 5.91E+04 | 5.46E+04 |
| 4.97E+04 | 3.75E+04 | 6.57E+04 | 1.09E+05 | 7.66E+04 | 6.94E+04 | 0.72             | 5.95E-01 | 1.39E-01 | 0.92    | 5.73E-01 | 6.11E-01  | 4.95E+04 | 4.57E+04 |
| 3.86E+05 | 5.45E+05 | 5.01E+05 | 8.84E+05 | 8.18E+05 | 6.34E+05 | 0.73             | 6.39E-01 | 1.94E-01 | 0.92    | 6.54E-01 | 6.72E-01  | 4.77E+05 | 4.41E+05 |
| 1.98E+04 | 3.63E+04 | 6.98E+04 | 9.64E+04 | 6.63E+04 | 8.47E+04 | 0.74             | 8.06E-01 | 2.70E-01 | 0.92    | 9.09E-01 | 7.42E-01  | 4.90E+04 | 4.52E+04 |
| 2.83E+05 | 2.91E+05 | 2.63E+05 | 3.27E+05 | 2.68E+05 | 3.02E+05 | 0.69             | 4.87E-01 | 1.43E-01 | 0.92    | 5.31E-01 | 6.26E-01  | 2.26E+05 | 2.08E+05 |
| 3.42E+05 | 6.12E+05 | 4.76E+05 | 8.65E+05 | 6.36E+05 | 7.13E+05 | 0.72             | 4.66E-01 | 5.38E-02 | 0.92    | 4.31E-01 | 4.83E-01  | 4.45E+05 | 4.10E+05 |
| 4.16E+04 | 5.53E+04 | 3.66E+04 | 5.12E+04 | 9.43E+04 | 8.38E+04 | 0.74             | 6.92E-01 | 2.23E-01 | 0.92    | 8.60E-01 | 7.32E-01  | 5.17E+04 | 4.76E+04 |
| 2.26E+05 | 2.13E+05 | 2.44E+05 | 3.74E+05 | 3.36E+05 | 3.02E+05 | 0.71             | 6.23E-01 | 1.67E-01 | 0.92    | 6.36E-01 | 6.42E-01  | 2.19E+05 | 2.02E+05 |
| 5.23E+04 | 7.10E+04 | 8.13E+04 | 1.20E+05 | 1.08E+05 | 1.06E+05 | 0.70             | 6.13E-01 | 1.69E-01 | 0.92    | 5.58E-01 | 6.10E-01  | 6.80E+04 | 6.26E+04 |
| 9.32E+04 | 1.31E+05 | 1.15E+05 | 1.99E+05 | 1.17E+05 | 1.77E+05 | 0.73             | 6.83E-01 | 2.15E-01 | 0.92    | 7.33E-01 | 6.84E-01  | 9.82E+04 | 9.03E+04 |
| 3.46E+05 | 4.26E+05 | 3.27E+05 | 6.40E+05 | 5.19E+05 | 5.15E+05 | 0.68             | 7.37E-01 | 2.67E-01 | 0.92    | 7.72E-01 | 7.27E-01  | 3.54E+05 | 3.26E+05 |
| 5.66E+04 | 5.68E+04 | 6.46E+04 | 9.55E+04 | 9.32E+04 | 7.84E+04 | 0.70             | 5.18E-01 | 1.00E-01 | 0.92    | 4.45E-01 | 5.10E-01  | 5.47E+04 | 5.03E+04 |
| 1.29E+05 | 1.62E+05 | 1.61E+05 | 2.17E+05 | 2.08E+05 | 2.43E+05 | 0.70             | 5.47E-01 | 1.17E-01 | 0.92    | 4.74E-01 | 5.31E-01  | 1.44E+05 | 1.33E+05 |
| 2.85E+05 | 1.63E+05 | 2.96E+05 | 3.64E+05 | 3.49E+05 | 1.44E+05 | 0.67             | 6.99E-01 | 2.22E-01 | 0.92    | 8.01E-01 | 7.10E-01  | 2.25E+05 | 2.07E+05 |

14 Supplemental Table S2

| Accession # | Protein                                                                            | # of Pep | PEPTIDE                           | Modification                             | XCorr | Charge | m/z [Da] |
|-------------|------------------------------------------------------------------------------------|----------|-----------------------------------|------------------------------------------|-------|--------|----------|
| 568936922   | P2X purinoceptor 4                                                                 | 4        | GVAVTNTSQLGFR                     | Deamidated(6)                            | 3.65  | 2      | 675.9    |
| 568936922   | P2X purinoceptor 4                                                                 | 4        | NILPNITTSYLK                      | Deamidated(5)                            | 2.96  | 2      | 689.4    |
| 6679641     | Emerin                                                                             | 1        | LIYQQDSAYQSIHYRPI SNVSR           | Deamidated(20)                           | 4.16  | 4      | 660.6    |
| 568991610   | Alpha-N-acetylgalactosaminidase                                                    | 1        | VNYTEVSR                          | Deamidated(2)                            | 2.47  | 2      | 484.7    |
| 84781760    | P2X purinoceptor 7                                                                 | 2        | SAENFTVLIK                        | Deamidated(4)                            | 2.85  | 2      | 561.8    |
| 569003275   | UDP-N-acetyl-alpha-D-galactosamine:polypeptide N-acetylgalactosaminyltransferase 1 | 1        | INQFNLMASEMIALNR                  | Deamidated(15)Oxidation(7)Oxidation(11)  | 2.51  | 2      | 949.5    |
| 569017350   | Endoplasmic reticulum-Golgi intermediate compartment protein 2                     | 1        | GHAHLAALVNHDSYNFSHR               | Deamidated(15)                           | 6.07  | 4      | 537.5    |
| 47271511    | Transforming growth factor beta receptor type 3                                    | 1        | AGVVVFNC SLR                      | Carbamidomethyl(8)Deamidated(7)          | 2.67  | 2      | 611.8    |
| 568987063   | stabilin-1                                                                         | 7        | GDPFPTVFVPHADLISNMSQDELAR         | Deamidated(17)Oxidation(18)              | 6.24  | 3      | 911.8    |
| 568959112   | SID1 transmembrane family, member 2                                                | 2        | TGELFTFN TAAQPQYFK                | Deamidated(8)                            | 5     | 2      | 1033.0   |
| 568913714   | Angiopoietin-related protein 2                                                     | 2        | ILNQTADMLQLASK                    | Deamidated(3)Oxidation(8)                | 4.21  | 2      | 781.9    |
| 568920137   | Laminin subunit alpha-5                                                            | 15       | QELSQDNATLK                       | Deamidated(7)                            | 3.83  | 2      | 624.3    |
| 113195678   | Lysosomal-associated membrane protein 1                                            | 7        | AFNISPNDTSSGSCGINLVTLK            | Carbamidomethyl(14)Deamidated(7)         | 6.04  | 3      | 766.0    |
| 226437659   | Endoglin                                                                           | 3        | VNITVLP SLTSR                     | Deamidated(2)                            | 3.43  | 2      | 650.9    |
| 568926396   | Tenascin                                                                           | 12       | LLQTA EHNISGAER                   | Deamidated(8)                            | 4.14  | 2      | 770.4    |
| 568938566   | Solute carrier family 12 member 9                                                  | 1        | HGHFTGFNGSTLR                     | Deamidated(8)                            | 3.14  | 2      | 716.3    |
| 6680878     | Lysosome membrane protein                                                          | 7        | NQSVGDPNVDLIR                     | Deamidated(1)                            | 2.46  | 2      | 714.4    |
| 568996676   | Phospholipase A1 member A                                                          | 1        | SSEFNASLGTK                       | Deamidated(5)                            | 2.97  | 2      | 571.3    |
| 568926396   | Tenascin                                                                           | 12       | LNYSLPTGQSMEVQLPK                 | Deamidated(2)Oxidation(11)               | 3.25  | 2      | 961.5    |
| 47523368    | Prolyl 3-hydroxylase 3                                                             | 2        | LHEAYAQVGNMSQAMENVLSVLLFYPEDEAAKK | Deamidated(10)Oxidation(11)Oxidation(15) | 6.04  | 4      | 932.9    |
| 90568038    | ATP-binding cassette sub-family A member 1                                         | 3        | YPTPGEAPGVVGNFNK                  | Deamidated(15)                           | 4.07  | 2      | 824.4    |
| 755522060   | Tripeptidyl-peptidase 1                                                            | 2        | SSSHLPPSSYFNASGR                  | Deamidated(12)                           | 4.13  | 3      | 565.6    |
| 13173473    | Major prion protein                                                                | 2        | GENFTETDVK                        | Deamidated(3)                            | 2.52  | 2      | 570.8    |
| 23346525    | CD109 antigen                                                                      | 3        | IYELHINGQSENEIVFSNR               | Deamidated(7)Deamidated(18)              | 5.81  | 3      | 755.4    |
| 568990229   | Leukemia inhibitory factor receptor                                                | 3        | LGVMHPGQEIHNFTLTGR                | Deamidated(13)Oxidation(5)               | 3.66  | 3      | 718.0    |
| 755549025   | Glycosyltransferase 8 domain-containing protein 1                                  | 2        | SNVMFYIVTFNSTADHLR                | Deamidated(11)Oxidation(4)               | 4.07  | 3      | 711.3    |
| 568976251   | Microfibril-associated glycoprotein 4                                              | 2        | FNGSVSFFR                         | Deamidated(2)                            | 2.94  | 2      | 531.3    |

14 Supplemental Table S2



| MH+ [Da] | RT [min] | PSM | WT-1     | WT-2     | WT-3     | WT-4     | WT-5     | WT-5-2   | WT-6     | WT-7     | WT-8     | Null-1   | Null-2   |
|----------|----------|-----|----------|----------|----------|----------|----------|----------|----------|----------|----------|----------|----------|
| 1350.7   | 38.0     | 33  | 1.20E+06 | 1.21E+06 | 1.42E+06 | 6.53E+05 | 1.66E+06 | 1.54E+06 | 5.96E+05 | 9.99E+05 | 4.54E+05 | 4.07E+05 | 9.27E+05 |
| 1377.8   | 50.8     | 17  | 7.75E+05 | 8.01E+05 | 1.08E+06 | 3.49E+05 | 1.22E+06 | 1.20E+06 | 4.28E+05 | 8.17E+05 | 3.71E+05 | 3.16E+05 | 6.78E+05 |
| 2639.3   | 39.6     | 5   | 5.64E+04 | 4.60E+04 | 9.72E+04 | 3.76E+04 | 1.01E+05 | 7.79E+04 | 1.13E+04 | 8.49E+03 | 4.06E+04 | 5.70E+04 | 4.58E+04 |
| 968.5    | 22.6     | 5   | 2.34E+05 | 1.89E+05 | 2.61E+05 | 1.11E+04 | 4.19E+05 | 4.31E+05 | 2.89E+05 | 2.17E+05 | 1.88E+05 | 1.03E+05 | 1.79E+05 |
| 1122.6   | 44.6     | 12  | 2.55E+05 | 2.66E+05 | 3.99E+05 | 1.20E+05 | 3.52E+05 | 3.39E+05 | 1.59E+05 | 2.74E+05 | 9.99E+04 | 7.53E+04 | 2.64E+05 |
| 1897.9   | 45.6     | 1   | 1.16E+05 | 1.89E+05 | 2.29E+05 | 7.55E+04 | 1.96E+05 | 1.65E+05 | 4.21E+04 | 1.52E+05 | 1.34E+05 | 3.94E+04 | 1.51E+05 |
| 2147.0   | 28.1     | 38  | 2.66E+05 | 2.55E+05 | 3.40E+05 | 0.00E+00 | 4.51E+05 | 3.57E+05 | 1.38E+05 | 2.52E+05 | 1.19E+05 | 9.69E+04 | 1.98E+05 |
| 1222.6   | 41.6     | 1   | 9.23E+04 | 7.42E+04 | 1.23E+05 | 5.73E+04 | 1.58E+05 | 1.85E+05 | 3.99E+04 | 8.68E+04 | 5.87E+04 | 5.46E+04 | 1.13E+05 |
| 2733.3   | 54.4     | 18  | 8.37E+05 | 1.06E+06 | 1.44E+06 | 6.58E+05 | 1.94E+06 | 1.72E+06 | 4.85E+05 | 1.04E+06 | 7.41E+05 | 4.49E+05 | 8.73E+05 |
| 2065.0   | 53.2     | 17  | 2.56E+05 | 3.50E+05 | 4.07E+05 | 2.30E+05 | 4.69E+05 | 3.48E+05 | 1.46E+05 | 3.46E+05 | 1.72E+05 | 1.27E+05 | 2.63E+05 |
| 1562.8   | 38.4     | 28  | 9.49E+05 | 8.74E+05 | 1.48E+06 | 7.49E+05 | 2.19E+06 | 2.14E+06 | 5.38E+05 | 1.10E+06 | 4.99E+05 | 6.34E+05 | 9.08E+05 |
| 1247.6   | 24.8     | 16  | 8.45E+05 | 4.99E+05 | 8.72E+05 | 3.24E+04 | 1.73E+06 | 1.48E+06 | 6.27E+05 | 6.68E+05 | 3.36E+05 | 4.25E+05 | 6.01E+05 |
| 2296.1   | 51.2     | 107 | 1.99E+06 | 2.67E+06 | 3.72E+06 | 9.45E+05 | 4.14E+06 | 3.67E+06 | 1.92E+06 | 1.95E+06 | 1.11E+06 | 9.76E+05 | 2.28E+06 |
| 1300.7   | 49.4     | 19  | 1.98E+06 | 2.73E+06 | 3.21E+06 | 1.40E+06 | 3.44E+06 | 3.04E+06 | 1.05E+06 | 1.59E+06 | 1.13E+06 | 8.75E+05 | 1.66E+06 |
| 1539.8   | 27.1     | 87  | 1.28E+05 | 9.93E+04 | 2.00E+05 | 0.00E+00 | 2.31E+05 | 1.35E+05 | 6.75E+04 | 1.91E+05 | 7.63E+04 | 9.28E+04 | 1.01E+05 |
| 1431.7   | 27.1     | 6   | 1.56E+05 | 1.25E+05 | 2.09E+05 | 1.87E+03 | 2.56E+05 | 2.04E+05 | 1.14E+05 | 1.69E+05 | 7.34E+04 | 5.30E+04 | 1.18E+05 |
| 1427.7   | 39.7     | 19  | 9.10E+05 | 9.95E+05 | 1.38E+06 | 4.36E+05 | 1.57E+06 | 1.49E+06 | 7.40E+05 | 9.65E+05 | 4.80E+05 | 4.16E+05 | 7.33E+05 |
| 1141.5   | 29.7     | 3   | 1.10E+05 | 9.58E+04 | 1.65E+05 | 6.17E+04 | 2.02E+05 | 2.35E+05 | 9.62E+04 | 6.78E+04 | 4.50E+04 | 5.43E+04 | 6.26E+04 |
| 1922.0   | 44.3     | 73  | 7.50E+06 | 1.04E+07 | 1.78E+07 | 1.04E+07 | 1.75E+07 | 1.65E+07 | 4.42E+06 | 1.26E+07 | 5.09E+06 | 7.57E+06 | 1.03E+07 |
| 3728.8   | 55.8     | 9   | 1.76E+05 | 3.18E+05 | 3.87E+05 | 1.66E+05 | 4.63E+05 | 3.67E+05 | 4.79E+04 | 3.17E+05 | 1.57E+05 | 2.64E+04 | 2.75E+05 |
| 1647.8   | 39.1     | 12  | 8.37E+04 | 1.27E+05 | 1.56E+05 | 3.24E+04 | 1.88E+05 | 1.39E+05 | 9.03E+04 | 6.49E+04 | 3.65E+04 | 3.07E+04 | 6.04E+04 |
| 1694.8   | 30.6     | 174 | 6.81E+06 | 4.98E+06 | 7.46E+06 | 3.02E+06 | 1.17E+07 | 1.07E+07 | 4.27E+06 | 5.69E+06 | 2.98E+06 | 2.84E+06 | 4.67E+06 |
| 1140.5   | 26.1     | 16  | 1.16E+06 | 7.79E+05 | 1.51E+06 | 9.50E+02 | 2.15E+06 | 1.71E+06 | 1.24E+06 | 1.16E+06 | 6.01E+05 | 4.31E+05 | 1.03E+06 |
| 2264.1   | 45.4     | 11  | 1.93E+05 | 2.66E+05 | 4.02E+05 | 1.51E+05 | 2.94E+05 | 2.79E+05 | 5.43E+04 | 1.72E+05 | 8.29E+04 | 8.74E+04 | 1.64E+05 |
| 2152.1   | 34.1     | 21  | 5.13E+05 | 2.95E+05 | 3.37E+05 | 2.09E+05 | 9.35E+05 | 8.12E+05 | 3.87E+05 | 3.92E+05 | 2.84E+05 | 2.77E+05 | 3.96E+05 |
| 2132.0   | 50.9     | 30  | 2.85E+05 | 4.14E+05 | 5.37E+05 | 1.95E+05 | 4.71E+05 | 4.18E+05 | 7.23E+04 | 3.72E+05 | 1.28E+05 | 1.01E+05 | 3.18E+05 |
| 1061.5   | 44.2     | 47  | 3.53E+06 | 4.83E+06 | 7.55E+06 | 2.51E+06 | 1.18E+07 | 1.09E+07 | 3.36E+06 | 6.01E+06 | 2.33E+06 | 2.69E+06 | 3.93E+06 |

14 Supplemental Table S2

| Null-3   | Null-4   | Null-5   | Null-6   | Null-7   | Null-8   | Ratio<br>Null/WT | SD       | p value  | N Ratio | N SD     | N p value | Avg_WT   | Avg_Null |
|----------|----------|----------|----------|----------|----------|------------------|----------|----------|---------|----------|-----------|----------|----------|
| 4.07E+05 | 7.16E+05 | 5.43E+05 | 1.26E+06 | 9.46E+05 | 1.00E+06 | 0.72             | 5.74E-01 | 1.14E-01 | 0.92    | 5.46E-01 | 5.65E-01  | 6.12E+05 | 5.62E+05 |
| 3.02E+05 | 6.08E+05 | 4.59E+05 | 7.84E+05 | 7.10E+05 | 6.22E+05 | 0.71             | 5.44E-01 | 1.14E-01 | 0.92    | 5.33E-01 | 5.66E-01  | 4.47E+05 | 4.10E+05 |
| 2.95E+04 | 2.56E+04 | 1.94E+04 | 2.28E+04 | 6.26E+04 | 2.06E+04 | 0.67             | 7.51E-01 | 1.95E-01 | 0.92    | 9.76E-01 | 7.45E-01  | 2.95E+04 | 2.71E+04 |
| 1.13E+05 | 1.89E+05 | 1.72E+05 | 2.45E+05 | 1.94E+05 | 2.41E+05 | 0.72             | 5.76E-01 | 1.61E-01 | 0.92    | 5.57E-01 | 5.98E-01  | 1.44E+05 | 1.32E+05 |
| 9.57E+04 | 1.74E+05 | 1.60E+05 | 2.16E+05 | 2.09E+05 | 2.51E+05 | 0.72             | 5.74E-01 | 1.20E-01 | 0.92    | 5.97E-01 | 5.94E-01  | 1.43E+05 | 1.31E+05 |
| 7.64E+04 | 9.35E+04 | 1.04E+05 | 1.43E+05 | 1.50E+05 | 1.12E+05 | 0.75             | 5.83E-01 | 1.63E-01 | 0.92    | 6.61E-01 | 6.38E-01  | 8.65E+04 | 7.93E+04 |
| 1.27E+05 | 1.54E+05 | 1.41E+05 | 2.33E+05 | 2.31E+05 | 1.97E+05 | 0.71             | 6.11E-01 | 1.85E-01 | 0.91    | 5.76E-01 | 6.14E-01  | 1.38E+05 | 1.26E+05 |
| 5.74E+04 | 5.74E+04 | 5.52E+04 | 7.02E+04 | 8.05E+04 | 4.98E+04 | 0.69             | 5.62E-01 | 1.21E-01 | 0.91    | 6.04E-01 | 5.85E-01  | 5.53E+04 | 5.05E+04 |
| 7.78E+05 | 5.30E+05 | 5.97E+05 | 1.19E+06 | 9.70E+05 | 8.75E+05 | 0.71             | 5.46E-01 | 1.15E-01 | 0.91    | 5.31E-01 | 5.40E-01  | 6.33E+05 | 5.77E+05 |
| 1.68E+05 | 2.05E+05 | 1.67E+05 | 2.65E+05 | 2.91E+05 | 2.51E+05 | 0.72             | 4.51E-01 | 6.17E-02 | 0.91    | 4.26E-01 | 4.68E-01  | 1.75E+05 | 1.60E+05 |
| 5.51E+05 | 7.20E+05 | 6.70E+05 | 1.02E+06 | 1.02E+06 | 8.98E+05 | 0.69             | 5.28E-01 | 1.31E-01 | 0.91    | 4.65E-01 | 5.46E-01  | 6.51E+05 | 5.94E+05 |
| 3.75E+05 | 5.46E+05 | 4.63E+05 | 8.16E+05 | 5.94E+05 | 4.43E+05 | 0.68             | 6.36E-01 | 2.00E-01 | 0.91    | 6.56E-01 | 6.44E-01  | 4.36E+05 | 3.98E+05 |
| 1.19E+06 | 1.78E+06 | 1.31E+06 | 2.28E+06 | 2.03E+06 | 1.81E+06 | 0.70             | 5.31E-01 | 1.06E-01 | 0.91    | 5.01E-01 | 5.15E-01  | 1.38E+06 | 1.26E+06 |
| 1.36E+06 | 1.31E+06 | 1.32E+06 | 2.17E+06 | 1.83E+06 | 1.59E+06 | 0.70             | 4.81E-01 | 8.09E-02 | 0.91    | 4.47E-01 | 4.75E-01  | 1.23E+06 | 1.12E+06 |
| 8.86E+04 | 1.09E+05 | 6.66E+04 | 5.57E+04 | 8.10E+04 | 1.04E+05 | 0.70             | 5.59E-01 | 1.69E-01 | 0.91    | 7.60E-01 | 6.70E-01  | 7.36E+04 | 6.69E+04 |
| 6.18E+04 | 1.10E+05 | 9.23E+04 | 1.21E+05 | 1.52E+05 | 1.22E+05 | 0.71             | 6.06E-01 | 1.68E-01 | 0.91    | 5.96E-01 | 5.90E-01  | 8.35E+04 | 7.59E+04 |
| 4.33E+05 | 6.35E+05 | 5.08E+05 | 1.20E+06 | 1.11E+06 | 6.24E+05 | 0.71             | 5.95E-01 | 1.18E-01 | 0.91    | 5.63E-01 | 5.35E-01  | 5.67E+05 | 5.15E+05 |
| 8.14E+04 | 2.87E+04 | 5.75E+04 | 1.07E+05 | 1.01E+05 | 1.64E+05 | 0.69             | 7.28E-01 | 1.78E-01 | 0.91    | 7.36E-01 | 6.34E-01  | 6.57E+04 | 5.97E+04 |
| 6.70E+06 | 9.72E+06 | 4.07E+06 | 6.21E+06 | 8.83E+06 | 8.53E+06 | 0.68             | 4.90E-01 | 8.00E-02 | 0.91    | 5.88E-01 | 5.59E-01  | 6.43E+06 | 5.85E+06 |
| 1.16E+05 | 1.97E+05 | 1.56E+05 | 2.90E+05 | 2.36E+05 | 2.57E+05 | 0.73             | 7.08E-01 | 2.11E-01 | 0.91    | 7.72E-01 | 6.39E-01  | 1.54E+05 | 1.40E+05 |
| 7.52E+04 | 6.26E+04 | 5.09E+04 | 1.37E+05 | 8.27E+04 | 5.46E+04 | 0.68             | 6.69E-01 | 1.46E-01 | 0.90    | 7.21E-01 | 6.13E-01  | 5.66E+04 | 5.12E+04 |
| 2.72E+06 | 4.16E+06 | 4.37E+06 | 5.93E+06 | 5.30E+06 | 5.25E+06 | 0.69             | 5.15E-01 | 1.03E-01 | 0.90    | 4.52E-01 | 4.65E-01  | 3.59E+06 | 3.25E+06 |
| 5.14E+05 | 8.33E+05 | 7.86E+05 | 1.01E+06 | 1.05E+06 | 7.18E+05 | 0.70             | 5.90E-01 | 1.54E-01 | 0.90    | 5.91E-01 | 5.64E-01  | 6.51E+05 | 5.88E+05 |
| 1.65E+05 | 1.30E+05 | 1.04E+05 | 1.86E+05 | 1.47E+05 | 1.64E+05 | 0.68             | 5.18E-01 | 1.15E-01 | 0.90    | 5.86E-01 | 5.64E-01  | 1.19E+05 | 1.07E+05 |
| 1.31E+05 | 3.10E+05 | 2.65E+05 | 4.04E+05 | 2.12E+05 | 5.67E+05 | 0.69             | 6.64E-01 | 1.62E-01 | 0.90    | 6.67E-01 | 5.82E-01  | 2.62E+05 | 2.36E+05 |
| 1.89E+05 | 1.89E+05 | 1.66E+05 | 2.77E+05 | 3.15E+05 | 2.65E+05 | 0.71             | 5.96E-01 | 1.45E-01 | 0.90    | 6.33E-01 | 5.83E-01  | 1.84E+05 | 1.66E+05 |
| 2.34E+06 | 3.73E+06 | 3.61E+06 | 5.83E+06 | 5.31E+06 | 4.73E+06 | 0.69             | 6.19E-01 | 1.72E-01 | 0.90    | 5.88E-01 | 5.76E-01  | 3.27E+06 | 2.95E+06 |

14 Supplemental Table S2

| Accession # | Protein                                                           | # of Pep | PEPTIDE                            | Modification                                          | XCorr | Charge | m/z [Da] |
|-------------|-------------------------------------------------------------------|----------|------------------------------------|-------------------------------------------------------|-------|--------|----------|
| 568938765   | Carbohydrate sulfotransferase 12                                  | 2        | LYANHTSLPASVSEAFSAGLK              | Deamidated(4)                                         | 5.39  | 3      | 722.0    |
| 568987063   | stabilin-1                                                        | 7        | VLTMANQVLTVNISEEGR                 | Deamidated(12)Oxidation(4)                            | 5.09  | 2      | 996.0    |
| 755537649   | Platelet endothelial cell adhesion molecule                       | 8        | GHAIGISCQSENGTAPITYHLMK            | Carbamidomethyl(8)Deamidated(12)Oxidation(22)         | 6.27  | 3      | 834.7    |
| 146231960   | Chondroitin sulfate proteoglycan 4                                | 2        | LDPTVLDASELANR                     | Deamidated(13)                                        | 3.87  | 2      | 757.9    |
| 19111162    | Transmembrane 9 superfamily member 3                              | 1        | IVDVNLTSEGK                        | Deamidated(5)                                         | 2.61  | 2      | 587.8    |
| 153791270   | Laminin subunit gamma-1                                           | 12       | YEQAKNISQDLEK                      | Deamidated(6)                                         | 4.7   | 2      | 783.9    |
| 153791389   | Integrin alpha-1                                                  | 13       | SQNDKFNVS LTVK                     | Deamidated(3)Deamidated(7)                            | 2.9   | 2      | 740.9    |
| 568922098   | Prostaglandin F2 receptor negative regulator                      | 3        | DLDLSCNITTD                        | Carbamidomethyl(6)Deamidated(7)                       | 2.94  | 2      | 712.3    |
| 6754900     | 5'-nucleotidase                                                   | 3        | LDNYSTQELGR                        | Deamidated(3)                                         | 3.18  | 2      | 648.8    |
| 568995055   | Transferrin receptor protein 1                                    | 2        | QKNITAFNETLFR                      | Deamidated(3)Deamidated(8)                            | 3.78  | 3      | 528.6    |
| 6754374     | Immunoglobulin superfamily containing leucine-rich repeat protein | 1        | DLEGVPPGFANVTTL SLSANR             | Deamidated(12)                                        | 4.47  | 3      | 752.7    |
| 46309573    | Protein sel-1 homolog 1                                           | 3        | MYSEGS DIVPQSN ETALHYFK            | Deamidated(13)Oxidation(1)                            | 5.35  | 3      | 811.7    |
| 568922098   | Prostaglandin F2 receptor negative regulator                      | 3        | EAATSLSNPIEIDFQTSGPTFNASVHSDTPSVTR | Deamidated(22)                                        | 7.61  | 3      | 1193.2   |
| 165972321   | LEM domain-containing protein 2                                   | 1        | CIPVLEAQEYIANVTSSPSSR              | Carbamidomethyl(1)Deamidated(13)                      | 4.23  | 3      | 774.7    |
| 755532856   | Laminin, alpha 2                                                  | 17       | NSGLLGALNDTMDKLSAITNDTAAK          | Deamidated(1)Deamidated(9)Deamidated(20)Oxidation(12) | 7.52  | 3      | 851.4    |
| 569003077   | Cadherin-2                                                        | 6        | ILSQAPSTPSPNMF TINNETGDIITVAAGLDR  | Deamidated(12)Deamidated(18)Oxidation(13)             | 4.92  | 3      | 1120.9   |
| 49457857    | Myelin protein zero-like protein 1                                | 2        | DASINIENIQAVHNGTYICDVK             | Carbamidomethyl(19)Deamidated(14)                     | 4.86  | 3      | 825.7    |
| 568950756   | ADAMTS-like protein 3                                             | 3        | ANGTVQVVSPR                        | Deamidated(2)                                         | 3.39  | 2      | 564.8    |
| 6755863     | Endoplasmic reticulum protein                                     | 3        | TDDEVVQREEEAIQLDGLNASQIR           | Deamidated(19)                                        | 6.87  | 3      | 910.4    |
| 568915555   | Integrin alpha V                                                  | 4        | ANTTQPGIVEGGQVLK                   | Deamidated(2)                                         | 3.48  | 2      | 806.9    |
| 268370173   | Peroxidase homolog                                                | 4        | VYCNLSAAYTFEDLKNEIK                | Carbamidomethyl(3)Deamidated(4)                       | 5.14  | 3      | 760.4    |
| 568920137   | Laminin subunit alpha-5                                           | 15       | LLGLGLPVSGTFHNFSGCISNVFVQR         | Carbamidomethyl(18)Deamidated(14)                     | 6.08  | 3      | 940.8    |
| 254939534   | Peptidyl-prolyl cis-trans isomerase FKBP10                        | 7        | TLSRPPENCNETSK                     | Carbamidomethyl(9)Deamidated(10)                      | 3.12  | 3      | 545.3    |
| 568905353   | Extracellular sulfatase                                           | 3        | DYFTDLITNESINYFK                   | Deamidated(9)                                         | 4.74  | 2      | 992.5    |
| 6680878     | Lysosome membrane protein 2                                       | 7        | TMVFPVMYLNESVLIDKETANQLK           | Deamidated(10)Deamidated(21)Oxidation(2)Oxidation(7)  | 7.25  | 3      | 939.5    |
| 156616286   | Collagen alpha-6(VI) chain                                        | 11       | LGNFSELATHNQTF LKK                 | Deamidated(3)Deamidated(11)                           | 5.21  | 3      | 650.7    |

| MH+ [Da] | RT [min] | PSM | WT-1     | WT-2     | WT-3     | WT-4     | WT-5     | WT-5-2   | WT-6     | WT-7     | WT-8     | Null-1   | Null-2   |
|----------|----------|-----|----------|----------|----------|----------|----------|----------|----------|----------|----------|----------|----------|
| 2164.1   | 48.0     | 17  | 1.15E+05 | 1.81E+05 | 1.68E+05 | 8.16E+04 | 1.68E+05 | 1.60E+05 | 3.66E+04 | 1.28E+05 | 6.51E+04 | 3.45E+04 | 7.38E+04 |
| 1991.0   | 44.2     | 19  | 2.51E+05 | 2.59E+05 | 3.72E+05 | 1.62E+05 | 4.03E+05 | 4.24E+05 | 8.43E+04 | 2.47E+05 | 1.46E+05 | 1.25E+05 | 2.72E+05 |
| 2502.2   | 32.5     | 21  | 2.00E+05 | 2.20E+05 | 3.47E+05 | 1.88E+05 | 4.80E+05 | 4.95E+05 | 1.78E+05 | 2.00E+05 | 1.24E+05 | 1.48E+05 | 2.23E+05 |
| 1514.8   | 45.9     | 18  | 7.13E+05 | 9.06E+05 | 1.19E+06 | 4.15E+05 | 1.32E+06 | 1.22E+06 | 5.88E+05 | 6.63E+05 | 4.50E+05 | 2.87E+05 | 6.74E+05 |
| 1174.6   | 32.4     | 34  | 6.91E+06 | 6.88E+06 | 8.91E+06 | 3.68E+06 | 8.60E+06 | 7.99E+06 | 3.10E+06 | 5.50E+06 | 2.76E+06 | 2.29E+06 | 4.81E+06 |
| 1566.8   | 26.7     | 19  | 6.31E+05 | 2.49E+05 | 5.09E+05 | 2.71E+05 | 1.07E+06 | 8.63E+05 | 2.69E+05 | 2.68E+05 | 2.08E+05 | 2.98E+05 | 2.05E+05 |
| 1480.8   | 32.5     | 10  | 8.31E+04 | 1.14E+05 | 2.61E+05 | 3.25E+04 | 1.52E+05 | 1.49E+05 | 3.08E+04 | 8.59E+04 | 3.37E+04 | 1.91E+04 | 1.17E+05 |
| 1423.6   | 40.6     | 12  | 1.41E+05 | 2.05E+05 | 2.52E+05 | 1.01E+05 | 3.12E+05 | 2.72E+05 | 1.44E+05 | 1.90E+05 | 1.11E+05 | 6.30E+04 | 1.86E+05 |
| 1296.6   | 28.2     | 14  | 1.27E+05 | 6.74E+04 | 1.42E+05 | 7.31E+04 | 1.68E+05 | 1.57E+05 | 9.18E+04 | 1.14E+05 | 5.60E+04 | 3.35E+04 | 5.68E+04 |
| 1583.8   | 42.2     | 8   | 1.14E+05 | 4.82E+04 | 2.13E+05 | 2.73E+04 | 3.33E+05 | 3.05E+05 | 8.69E+04 | 1.73E+05 | 9.97E+04 | 6.83E+04 | 1.07E+05 |
| 2256.2   | 60.6     | 48  | 2.87E+05 | 3.82E+05 | 5.33E+05 | 2.59E+05 | 6.28E+05 | 5.50E+05 | 7.68E+04 | 3.99E+05 | 2.06E+05 | 1.34E+05 | 3.43E+05 |
| 2433.1   | 41.9     | 18  | 6.94E+05 | 7.79E+05 | 9.76E+05 | 3.73E+05 | 1.18E+06 | 1.09E+06 | 4.40E+05 | 7.57E+05 | 3.67E+05 | 2.71E+05 | 5.61E+05 |
| 3577.7   | 51.4     | 17  | 2.49E+05 | 3.44E+05 | 4.97E+05 | 1.91E+05 | 4.58E+05 | 4.18E+05 | 7.69E+04 | 3.09E+05 | 1.38E+05 | 4.83E+04 | 3.78E+05 |
| 2322.1   | 58.2     | 15  | 8.77E+04 | 5.65E+04 | 1.47E+05 | 4.16E+04 | 2.04E+05 | 1.74E+05 | 2.34E+04 | 9.44E+04 | 4.35E+04 | 5.35E+04 | 7.85E+04 |
| 2552.2   | 52.2     | 61  | 2.05E+05 | 1.72E+05 | 4.60E+05 | 1.38E+05 | 6.78E+05 | 5.19E+05 | 4.14E+04 | 2.53E+05 | 1.06E+05 | 1.34E+05 | 1.83E+05 |
| 3360.7   | 61.0     | 50  | 4.20E+05 | 2.52E+05 | 9.79E+05 | 3.89E+05 | 1.07E+06 | 9.73E+05 | 7.86E+04 | 9.78E+05 | 6.10E+05 | 2.27E+05 | 9.24E+05 |
| 2475.2   | 44.5     | 4   | 5.53E+04 | 9.40E+04 | 1.24E+05 | 4.27E+04 | 9.15E+04 | 9.38E+04 | 2.92E+04 | 5.97E+04 | 4.51E+04 | 2.70E+04 | 6.25E+04 |
| 1128.6   | 25.9     | 16  | 1.73E+05 | 1.78E+05 | 1.39E+05 | 4.95E+04 | 2.28E+05 | 1.77E+05 | 9.11E+04 | 9.74E+04 | 3.48E+04 | 4.28E+04 | 8.11E+04 |
| 2729.3   | 47.8     | 16  | 8.76E+05 | 1.05E+06 | 1.33E+06 | 6.11E+05 | 1.09E+06 | 1.01E+06 | 3.29E+05 | 6.37E+05 | 3.62E+05 | 1.87E+05 | 6.34E+05 |
| 1612.9   | 34.7     | 38  | 1.69E+06 | 2.51E+06 | 2.63E+06 | 1.07E+06 | 2.35E+06 | 2.30E+06 | 1.66E+06 | 1.31E+06 | 9.16E+05 | 5.90E+05 | 1.15E+06 |
| 2279.1   | 49.8     | 17  | 3.27E+05 | 4.30E+05 | 9.11E+05 | 3.38E+05 | 5.64E+05 | 6.07E+05 | 8.16E+04 | 3.19E+05 | 1.32E+05 | 2.30E+05 | 4.99E+05 |
| 2820.5   | 61.3     | 26  | 2.47E+05 | 2.88E+05 | 7.59E+05 | 1.06E+05 | 7.28E+05 | 6.08E+05 | 4.36E+04 | 3.92E+05 | 1.33E+05 | 1.07E+05 | 3.17E+05 |
| 1633.7   | 18.8     | 13  | 6.90E+05 | 4.09E+05 | 6.93E+05 | 8.89E+02 | 8.12E+05 | 1.05E+05 | 5.91E+05 | 2.96E+05 | 1.78E+05 | 4.34E+04 | 2.33E+05 |
| 1983.9   | 70.9     | 32  | 8.81E+04 | 1.93E+05 | 2.10E+05 | 5.40E+04 | 2.05E+05 | 1.95E+05 | 2.02E+04 | 1.20E+05 | 5.79E+04 | 4.84E+04 | 1.04E+05 |
| 2816.4   | 54.0     | 54  | 2.00E+06 | 4.29E+05 | 2.19E+06 | 4.82E+05 | 8.72E+05 | 6.91E+05 | 5.84E+05 | 4.23E+05 | 2.41E+05 | 4.14E+05 | 9.03E+05 |
| 1950.0   | 38.3     | 1   | 5.09E+04 | 4.74E+04 | 3.03E+04 | 4.25E+04 | 1.18E+05 | 1.17E+05 | 1.47E+04 | 3.71E+04 | 2.01E+04 | 3.70E+04 | 3.48E+04 |

14 Supplemental Table S2

| Null-3   | Null-4   | Null-5   | Null-6   | Null-7   | Null-8   | Ratio<br>Null/WT | SD       | p value  | N Ratio | N SD     | N p value | Avg_WT   | Avg_Null |
|----------|----------|----------|----------|----------|----------|------------------|----------|----------|---------|----------|-----------|----------|----------|
| 8.05E+04 | 6.58E+04 | 8.52E+04 | 1.35E+05 | 1.04E+05 | 1.22E+05 | 0.72             | 5.65E-01 | 1.14E-01 | 0.90    | 6.08E-01 | 5.50E-01  | 7.10E+04 | 6.41E+04 |
| 1.18E+05 | 1.36E+05 | 1.31E+05 | 2.18E+05 | 1.77E+05 | 2.90E+05 | 0.70             | 5.85E-01 | 1.20E-01 | 0.90    | 5.73E-01 | 5.20E-01  | 1.49E+05 | 1.34E+05 |
| 1.18E+05 | 1.85E+05 | 1.40E+05 | 2.59E+05 | 2.52E+05 | 1.29E+05 | 0.67             | 5.50E-01 | 1.03E-01 | 0.90    | 5.25E-01 | 4.81E-01  | 1.50E+05 | 1.35E+05 |
| 3.67E+05 | 4.98E+05 | 5.42E+05 | 8.98E+05 | 7.88E+05 | 5.91E+05 | 0.70             | 5.37E-01 | 8.86E-02 | 0.90    | 4.90E-01 | 4.40E-01  | 4.72E+05 | 4.24E+05 |
| 3.21E+06 | 3.51E+06 | 3.90E+06 | 5.91E+06 | 5.35E+06 | 4.63E+06 | 0.70             | 4.72E-01 | 6.37E-02 | 0.90    | 4.36E-01 | 4.08E-01  | 3.44E+06 | 3.09E+06 |
| 2.78E+05 | 2.35E+05 | 2.76E+05 | 6.16E+05 | 3.80E+05 | 2.36E+05 | 0.65             | 6.99E-01 | 1.72E-01 | 0.90    | 7.58E-01 | 6.16E-01  | 2.63E+05 | 2.36E+05 |
| 4.08E+04 | 6.61E+04 | 7.13E+04 | 8.59E+04 | 8.58E+04 | 9.13E+04 | 0.69             | 7.90E-01 | 2.61E-01 | 0.90    | 8.89E-01 | 6.78E-01  | 5.83E+04 | 5.24E+04 |
| 6.73E+04 | 1.35E+05 | 1.16E+05 | 1.45E+05 | 1.71E+05 | 2.06E+05 | 0.71             | 5.48E-01 | 9.32E-02 | 0.90    | 5.24E-01 | 4.61E-01  | 1.10E+05 | 9.89E+04 |
| 7.33E+04 | 5.29E+04 | 6.62E+04 | 1.23E+05 | 8.80E+04 | 1.26E+05 | 0.70             | 5.56E-01 | 8.28E-02 | 0.90    | 5.39E-01 | 4.64E-01  | 6.30E+04 | 5.64E+04 |
| 8.92E+04 | 7.98E+04 | 1.27E+05 | 1.37E+05 | 1.74E+05 | 6.57E+04 | 0.68             | 7.21E-01 | 2.29E-01 | 0.89    | 7.75E-01 | 6.31E-01  | 8.82E+04 | 7.89E+04 |
| 1.54E+05 | 2.48E+05 | 2.25E+05 | 3.77E+05 | 3.33E+05 | 2.52E+05 | 0.70             | 5.79E-01 | 1.27E-01 | 0.89    | 5.83E-01 | 5.11E-01  | 2.11E+05 | 1.89E+05 |
| 3.62E+05 | 4.88E+05 | 4.68E+05 | 6.45E+05 | 7.45E+05 | 5.86E+05 | 0.70             | 4.93E-01 | 7.46E-02 | 0.89    | 4.44E-01 | 4.00E-01  | 4.23E+05 | 3.78E+05 |
| 1.00E+05 | 1.44E+05 | 1.60E+05 | 2.87E+05 | 3.02E+05 | 2.86E+05 | 0.72             | 7.38E-01 | 2.02E-01 | 0.89    | 7.88E-01 | 6.07E-01  | 1.70E+05 | 1.52E+05 |
| 4.19E+04 | 6.17E+04 | 6.68E+04 | 7.90E+04 | 8.83E+04 | 4.52E+04 | 0.66             | 6.14E-01 | 1.77E-01 | 0.89    | 6.53E-01 | 5.82E-01  | 5.39E+04 | 4.81E+04 |
| 1.89E+05 | 1.57E+05 | 1.43E+05 | 3.53E+05 | 2.48E+05 | 8.85E+04 | 0.65             | 7.80E-01 | 2.30E-01 | 0.89    | 8.66E-01 | 6.53E-01  | 1.56E+05 | 1.39E+05 |
| 4.51E+05 | 2.22E+05 | 4.25E+05 | 5.20E+05 | 5.66E+05 | 3.46E+05 | 0.72             | 7.72E-01 | 2.46E-01 | 0.89    | 9.46E-01 | 6.70E-01  | 3.82E+05 | 3.41E+05 |
| 3.56E+04 | 5.12E+04 | 4.55E+04 | 5.73E+04 | 5.81E+04 | 5.75E+04 | 0.70             | 4.87E-01 | 8.86E-02 | 0.89    | 4.92E-01 | 4.56E-01  | 4.09E+04 | 3.65E+04 |
| 8.82E+04 | 8.64E+04 | 6.79E+04 | 1.12E+05 | 1.16E+05 | 1.01E+05 | 0.67             | 5.23E-01 | 9.63E-02 | 0.89    | 5.49E-01 | 4.85E-01  | 7.23E+04 | 6.43E+04 |
| 2.84E+05 | 5.20E+05 | 5.51E+05 | 8.41E+05 | 7.91E+05 | 7.24E+05 | 0.70             | 5.85E-01 | 1.06E-01 | 0.89    | 5.90E-01 | 4.76E-01  | 4.60E+05 | 4.09E+05 |
| 8.54E+05 | 1.25E+06 | 9.72E+05 | 1.90E+06 | 1.79E+06 | 1.67E+06 | 0.70             | 5.06E-01 | 6.09E-02 | 0.89    | 4.71E-01 | 3.69E-01  | 1.04E+06 | 9.24E+05 |
| 2.37E+05 | 3.25E+05 | 1.76E+05 | 2.12E+05 | 2.45E+05 | 2.13E+05 | 0.65             | 6.50E-01 | 1.45E-01 | 0.89    | 8.05E-01 | 6.01E-01  | 2.29E+05 | 2.03E+05 |
| 1.25E+05 | 2.12E+05 | 1.90E+05 | 3.91E+05 | 3.55E+05 | 3.11E+05 | 0.68             | 7.98E-01 | 2.63E-01 | 0.89    | 8.35E-01 | 6.31E-01  | 2.04E+05 | 1.81E+05 |
| 1.68E+05 | 2.99E+05 | 2.77E+05 | 3.92E+05 | 3.15E+05 | 6.13E+05 | 0.70             | 8.82E-01 | 2.84E-01 | 0.88    | 9.41E-01 | 6.42E-01  | 2.37E+05 | 2.09E+05 |
| 7.21E+04 | 7.08E+04 | 6.97E+04 | 1.26E+05 | 1.03E+05 | 1.01E+05 | 0.68             | 6.05E-01 | 1.62E-01 | 0.88    | 6.22E-01 | 5.37E-01  | 7.25E+04 | 6.40E+04 |
| 2.24E+05 | 6.75E+05 | 6.35E+05 | 3.14E+05 | 8.70E+05 | 5.76E+05 | 0.66             | 8.13E-01 | 2.60E-01 | 0.88    | 1.01E+00 | 6.79E-01  | 4.85E+05 | 4.27E+05 |
| 3.34E+04 | 1.92E+04 | 2.57E+04 | 5.13E+04 | 4.96E+04 | 2.12E+04 | 0.64             | 6.88E-01 | 1.88E-01 | 0.88    | 7.82E-01 | 5.89E-01  | 2.90E+04 | 2.56E+04 |

14 Supplemental Table S2

| Accession # | Protein                                                  | # of Pep | PEPTIDE                             | Modification                                         | XCorr | Charge | m/z [Da] |
|-------------|----------------------------------------------------------|----------|-------------------------------------|------------------------------------------------------|-------|--------|----------|
| 568920137   | Laminin subunit alpha-5                                  | 15       | RLNTTGISFGCTADLLVGR                 | Carbamidomethyl(11)Deamidated(3)                     | 4.58  | 3      | 684.7    |
| 568992751   | Transmembrane protein 106C                               | 1        | SEHLVNFTVK                          | Deamidated(6)                                        | 2.67  | 2      | 587.8    |
| 160333372   | Lumican                                                  | 5        | LSHNELADSGVPGNSFNISLLELDL<br>SYNK   | Deamidated(14)                                       | 4.42  | 3      | 1078.9   |
| 133778978   | Cation-independent mannose-6-phosphate receptor          | 12       | DAGVGFPEYQEEDNSTYNFR                | Deamidated(14)                                       | 5.28  | 2      | 1170.0   |
| 133778978   | Cation-independent mannose-6-phosphate receptor          | 12       | ISTNITLVCKPGDLESAPVLR               | Carbamidomethyl(9)Deamidated(4)                      | 4.36  | 3      | 762.1    |
| 161086902   | Voltage-dependent calcium channel subunit alpha-2/delta- | 6        | SFSGLLDCGNCSR                       | Carbamidomethyl(8)Carbamidomethyl(11)Deamidated(10)  | 3.17  | 2      | 737.3    |
| 153791270   | Laminin subunit gamma-1                                  | 12       | MAAANVSITQPESTGEPNNMTLLAE<br>EARK   | Deamidated(5)Deamidated(19)Oxidation(1)Oxidation(20) | 3.24  | 3      | 1036.5   |
| 568933000   | Platelet glycoprotein 4                                  | 5        | VFNGKDNISK                          | Deamidated(3)Deamidated(7):Carbamyl                  | 2.7   | 2      | 583.8    |
| 568911077   | Nicastrin                                                | 4        | LLNATHQIGCQSSISGDTGVIHVVEK<br>EEDLK | Carbamidomethyl(10)Deamidated(3)                     | 5.59  | 5      | 676.5    |
| 339895744   | Collagen alpha-3(VI) chain                               | 5        | QINPPHTANSSLTSK                     | Deamidated(9)                                        | 3.96  | 3      | 532.6    |
| 755532856   | Laminin, alpha 2                                         | 17       | GLFPAVLNLASNALITTNATCGEK            | Carbamidomethyl(21)Deamidated(12)<br>)Deamidated(18) | 5.09  | 3      | 826.4    |
| 225637540   | transforming growth factor beta-3 preproprotein          | 1        | LTSPPEPSVMTHVPYQVLALYNSTR           | Deamidated(22)Oxidation(10)                          | 5.68  | 3      | 939.8    |
| 568930481   | Alkaline phosphatase, tissue-nonspecific isozyme         | 1        | VVDGERENVSMVDYAHNNYQAQS<br>AVPLR    | Deamidated(8)Oxidation(11)                           | 4.36  | 4      | 795.4    |
| 755495449   | Immunoglobulin superfamily member 8                      | 2        | IGPGELELLCNVSGALPPPGR               | Carbamidomethyl(11)Deamidated(12)<br>)               | 5.32  | 3      | 748.7    |
| 144094256   | Sulfatase-modifying factor 1                             | 1        | FVNSTGYLTEAEK                       | Deamidated(3)                                        | 3.83  | 2      | 730.4    |
| 568939489   | Epsilon-Sarcoglycan                                      | 1        | LNAINITSALDR                        | Deamidated(5)                                        | 3.2   | 2      | 651.4    |
| 23943820    | Paired immunoglobulin-like type 2 receptor alpha         | 1        | DFHGEFIYNSSLPFIHEHFK                | Deamidated(9)                                        | 3.74  | 4      | 617.0    |
| 755530199   | Integrin alpha-11                                        | 3        | VCNVSYPFFR                          | Carbamidomethyl(2)Deamidated(3)                      | 2.66  | 2      | 645.3    |
| 755549025   | Glycosyltransferase 8 domain-containing protein 1        | 2        | RQNVTNQLEK                          | Deamidated(3)                                        | 2.59  | 2      | 615.8    |
| 133778978   | Cation-independent mannose-6-phosphate receptor          | 12       | AGINASYSEK                          | Deamidated(4)                                        | 2.56  | 2      | 520.7    |
| 568991301   | Plexin B2                                                | 10       | VVFLSPAVPEEPEAYNLTVLIR              | Deamidated(16)                                       | 4.41  | 2      | 1229.2   |
| 569000314   | Elastin microfibril interfacier 2                        | 3        | LQEDVNALHSQLNHSECTGYLQN<br>GVSDSR   | Carbamidomethyl(17)Deamidated(13)<br>)Deamidated(24) | 6.14  | 4      | 844.4    |
| 157057166   | Toll-like receptor 9                                     | 5        | ALTNGTLPNGTLLQK                     | Deamidated(4)Deamidated(9)                           | 3.84  | 2      | 771.9    |
| 225903442   | Integrin alpha-5                                         | 6        | TEKDPQNDPVGTCYLSTENFTR              | Carbamidomethyl(13)Deamidated(19)<br>)               | 5.95  | 3      | 858.4    |

| MH+ [Da] | RT [min] | PSM | WT-1     | WT-2     | WT-3     | WT-4     | WT-5     | WT-5-2   | WT-6     | WT-7     | WT-8     | Null-1   | Null-2   |
|----------|----------|-----|----------|----------|----------|----------|----------|----------|----------|----------|----------|----------|----------|
| 2052.1   | 50.0     | 14  | 2.13E+05 | 2.30E+05 | 5.70E+05 | 1.45E+05 | 7.15E+05 | 6.50E+05 | 8.68E+04 | 3.54E+05 | 1.41E+05 | 9.29E+04 | 3.80E+05 |
| 1174.6   | 33.2     | 5   | 9.79E+04 | 1.71E+05 | 2.47E+05 | 4.82E+04 | 1.85E+05 | 2.09E+05 | 1.49E+05 | 1.09E+05 | 6.40E+04 | 5.57E+04 | 1.02E+05 |
| 3234.6   | 63.1     | 63  | 3.53E+05 | 5.42E+05 | 1.29E+06 | 5.03E+05 | 1.11E+06 | 8.97E+05 | 1.71E+05 | 5.12E+05 | 1.33E+05 | 8.87E+04 | 1.11E+05 |
| 2339.0   | 47.6     | 37  | 4.45E+05 | 6.20E+05 | 6.64E+05 | 2.31E+05 | 6.04E+05 | 5.55E+05 | 2.32E+05 | 3.16E+05 | 2.35E+05 | 2.00E+05 | 3.46E+05 |
| 2284.2   | 46.1     | 17  | 5.35E+05 | 1.16E+06 | 1.52E+06 | 3.27E+05 | 1.29E+06 | 1.25E+06 | 2.49E+05 | 7.84E+05 | 2.95E+05 | 2.25E+05 | 7.90E+05 |
| 1473.6   | 39.0     | 13  | 1.20E+05 | 7.91E+04 | 2.34E+05 | 3.25E+04 | 2.69E+05 | 3.31E+05 | 9.90E+04 | 1.28E+05 | 5.74E+04 | 3.49E+04 | 2.00E+05 |
| 3107.5   | 36.7     | 6   | 8.93E+04 | 5.41E+04 | 5.22E+04 | 6.67E+04 | 1.96E+05 | 1.64E+05 | 2.95E+04 | 6.16E+04 | 3.69E+04 | 5.13E+04 | 4.98E+04 |
| 1166.6   | 33.8     | 1   | 1.79E+05 | 4.20E+04 | 5.19E+04 | 3.28E+04 | 2.59E+05 | 2.48E+05 | 5.28E+04 | 7.33E+04 | 5.47E+04 | 7.87E+04 | 4.55E+04 |
| 3378.7   | 40.5     | 16  | 2.61E+05 | 3.65E+05 | 5.64E+05 | 8.03E+04 | 5.30E+05 | 5.74E+05 | 1.31E+05 | 2.94E+05 | 1.16E+05 | 9.27E+04 | 3.11E+05 |
| 1595.8   | 23.9     | 44  | 8.23E+05 | 3.50E+05 | 8.67E+05 | 1.10E+04 | 1.83E+06 | 1.73E+06 | 4.93E+05 | 6.21E+05 | 3.25E+05 | 4.68E+05 | 6.23E+05 |
| 2477.3   | 65.8     | 135 | 6.58E+04 | 1.59E+05 | 5.84E+05 | 4.75E+04 | 3.31E+05 | 3.19E+05 | 4.51E+04 | 1.75E+05 | 6.67E+04 | 4.50E+04 | 2.26E+05 |
| 2817.4   | 49.8     | 17  | 2.82E+05 | 4.67E+05 | 6.60E+05 | 1.96E+05 | 6.49E+05 | 6.39E+05 | 1.13E+05 | 4.28E+05 | 1.43E+05 | 1.62E+05 | 2.41E+05 |
| 3178.5   | 32.8     | 5   | 1.63E+05 | 8.33E+04 | 2.52E+05 | 4.37E+04 | 2.41E+05 | 2.18E+05 | 8.78E+04 | 1.50E+05 | 7.76E+04 | 6.59E+04 | 1.08E+05 |
| 2244.2   | 63.2     | 30  | 1.04E+05 | 2.32E+05 | 2.44E+05 | 7.92E+04 | 2.67E+05 | 2.13E+05 | 3.89E+04 | 1.51E+05 | 7.04E+04 | 3.19E+04 | 1.42E+05 |
| 1459.7   | 36.4     | 16  | 2.03E+05 | 2.83E+05 | 3.19E+05 | 1.87E+05 | 3.98E+05 | 3.71E+05 | 1.81E+05 | 1.81E+05 | 1.33E+05 | 1.04E+05 | 1.40E+05 |
| 1301.7   | 48.6     | 15  | 5.95E+05 | 7.13E+05 | 8.22E+05 | 4.11E+05 | 1.20E+06 | 1.04E+06 | 3.96E+05 | 7.34E+05 | 3.36E+05 | 2.14E+05 | 7.27E+05 |
| 2465.2   | 48.7     | 6   | 7.99E+04 | 1.59E+05 | 1.42E+05 | 7.35E+04 | 1.18E+05 | 1.22E+05 | 1.02E+04 | 1.24E+05 | 7.45E+04 | 2.04E+04 | 8.38E+04 |
| 1289.6   | 45.6     | 9   | 5.36E+04 | 1.32E+05 | 1.25E+05 | 3.01E+04 | 1.63E+05 | 1.04E+05 | 9.20E+04 | 7.45E+04 | 4.25E+04 | 2.37E+04 | 7.34E+04 |
| 1230.6   | 18.2     | 7   | 9.90E+04 | 2.28E+04 | 5.14E+04 | 0.00E+00 | 1.09E+05 | 1.37E+05 | 1.08E+05 | 7.83E+03 | 6.49E+02 | 7.13E+03 | 6.36E+03 |
| 1040.5   | 22.9     | 6   | 7.98E+05 | 7.86E+05 | 9.40E+05 | 8.70E+02 | 1.28E+06 | 1.15E+06 | 6.12E+05 | 7.12E+05 | 2.77E+05 | 2.99E+05 | 5.25E+05 |
| 2457.3   | 66.6     | 27  | 6.02E+05 | 7.48E+05 | 4.59E+05 | 7.15E+05 | 1.78E+06 | 1.45E+06 | 2.43E+05 | 1.03E+06 | 6.08E+05 | 4.52E+05 | 6.28E+05 |
| 3374.5   | 36.7     | 5   | 1.73E+05 | 1.83E+05 | 3.36E+05 | 1.23E+05 | 4.81E+05 | 4.77E+05 | 1.41E+05 | 1.82E+05 | 5.64E+04 | 8.97E+04 | 1.70E+05 |
| 1542.8   | 43.6     | 3   | 7.54E+04 | 7.32E+04 | 1.54E+05 | 2.83E+04 | 1.18E+05 | 1.05E+05 | 5.43E+04 | 9.70E+04 | 2.67E+04 | 2.03E+04 | 8.27E+04 |
| 2573.1   | 38.9     | 17  | 5.14E+05 | 7.38E+05 | 9.27E+05 | 2.53E+05 | 8.94E+05 | 8.93E+05 | 5.36E+05 | 3.64E+05 | 3.50E+05 | 1.89E+05 | 5.36E+05 |

14 Supplemental Table S2

| Null-3   | Null-4   | Null-5   | Null-6   | Null-7   | Null-8   | Ratio<br>Null/WT | SD       | p value  | N Ratio | N SD     | N p value | Avg_WT   | Avg_Null |
|----------|----------|----------|----------|----------|----------|------------------|----------|----------|---------|----------|-----------|----------|----------|
| 1.61E+05 | 2.23E+05 | 1.72E+05 | 3.04E+05 | 2.32E+05 | 2.80E+05 | 0.67             | 7.27E-01 | 2.12E-01 | 0.88    | 7.85E-01 | 5.90E-01  | 1.92E+05 | 1.69E+05 |
| 7.97E+04 | 9.37E+04 | 8.36E+04 | 1.37E+05 | 1.06E+05 | 1.09E+05 | 0.67             | 4.88E-01 | 8.13E-02 | 0.88    | 4.72E-01 | 4.03E-01  | 8.06E+04 | 7.10E+04 |
| 1.53E+05 | 2.10E+05 | 3.84E+05 | 6.83E+05 | 9.04E+05 | 8.65E+05 | 0.69             | 1.02E+00 | 3.16E-01 | 0.88    | 1.11E+00 | 6.83E-01  | 3.34E+05 | 2.94E+05 |
| 2.61E+05 | 2.59E+05 | 2.04E+05 | 3.64E+05 | 4.40E+05 | 2.90E+05 | 0.68             | 4.78E-01 | 6.43E-02 | 0.88    | 4.62E-01 | 3.71E-01  | 2.48E+05 | 2.18E+05 |
| 3.69E+05 | 5.41E+05 | 3.96E+05 | 6.42E+05 | 7.80E+05 | 7.56E+05 | 0.68             | 6.69E-01 | 1.76E-01 | 0.88    | 7.05E-01 | 5.45E-01  | 4.64E+05 | 4.08E+05 |
| 6.26E+04 | 8.63E+04 | 1.05E+05 | 7.24E+04 | 1.20E+05 | 1.09E+05 | 0.66             | 7.83E-01 | 2.10E-01 | 0.88    | 8.88E-01 | 6.07E-01  | 8.27E+04 | 7.26E+04 |
| 5.96E+04 | 3.84E+04 | 3.65E+04 | 9.41E+04 | 5.48E+04 | 4.03E+04 | 0.64             | 6.64E-01 | 1.69E-01 | 0.88    | 7.47E-01 | 5.53E-01  | 4.57E+04 | 4.01E+04 |
| 8.69E+04 | 3.96E+04 | 6.16E+04 | 1.13E+05 | 1.12E+05 | 2.14E+04 | 0.63             | 8.32E-01 | 2.45E-01 | 0.88    | 1.01E+00 | 6.55E-01  | 6.07E+04 | 5.32E+04 |
| 1.53E+05 | 1.96E+05 | 1.77E+05 | 2.31E+05 | 2.66E+05 | 3.17E+05 | 0.67             | 6.50E-01 | 1.65E-01 | 0.88    | 6.70E-01 | 5.20E-01  | 1.81E+05 | 1.59E+05 |
| 3.51E+05 | 3.66E+05 | 4.46E+05 | 5.68E+05 | 6.51E+05 | 5.68E+05 | 0.64             | 6.58E-01 | 2.22E-01 | 0.88    | 6.83E-01 | 5.81E-01  | 4.29E+05 | 3.76E+05 |
| 7.73E+04 | 1.27E+05 | 8.93E+04 | 1.67E+05 | 1.70E+05 | 1.62E+05 | 0.67             | 9.07E-01 | 3.26E-01 | 0.87    | 1.03E+00 | 6.77E-01  | 1.10E+05 | 9.62E+04 |
| 2.41E+05 | 3.07E+05 | 1.66E+05 | 3.51E+05 | 3.57E+05 | 2.94E+05 | 0.67             | 5.63E-01 | 1.23E-01 | 0.87    | 6.02E-01 | 4.81E-01  | 2.24E+05 | 1.96E+05 |
| 1.13E+05 | 1.06E+05 | 9.43E+04 | 1.30E+05 | 9.36E+04 | 5.24E+04 | 0.65             | 5.18E-01 | 9.21E-02 | 0.87    | 6.31E-01 | 4.69E-01  | 8.31E+04 | 7.26E+04 |
| 7.38E+04 | 9.46E+04 | 7.62E+04 | 1.33E+05 | 1.56E+05 | 1.51E+05 | 0.69             | 6.69E-01 | 1.65E-01 | 0.87    | 6.92E-01 | 5.07E-01  | 8.87E+04 | 7.74E+04 |
| 1.62E+05 | 1.86E+05 | 1.24E+05 | 2.45E+05 | 1.70E+05 | 1.97E+05 | 0.66             | 4.27E-01 | 3.37E-02 | 0.87    | 4.01E-01 | 2.45E-01  | 1.42E+05 | 1.24E+05 |
| 2.39E+05 | 4.98E+05 | 4.11E+05 | 5.76E+05 | 5.32E+05 | 5.79E+05 | 0.68             | 5.44E-01 | 7.89E-02 | 0.87    | 5.51E-01 | 3.90E-01  | 3.95E+05 | 3.45E+05 |
| 7.13E+04 | 6.02E+04 | 5.66E+04 | 8.26E+04 | 9.88E+04 | 1.01E+05 | 0.72             | 5.85E-01 | 1.31E-01 | 0.87    | 6.74E-01 | 5.01E-01  | 6.00E+04 | 5.23E+04 |
| 3.59E+04 | 1.13E+05 | 3.01E+04 | 6.30E+04 | 7.10E+04 | 7.93E+04 | 0.67             | 6.61E-01 | 1.27E-01 | 0.87    | 7.75E-01 | 5.35E-01  | 5.15E+04 | 4.50E+04 |
| 3.53E+04 | 3.31E+04 | 3.56E+04 | 6.14E+04 | 5.65E+04 | 6.31E+04 | 0.63             | 9.46E-01 | 2.83E-01 | 0.87    | 1.22E+00 | 7.06E-01  | 3.08E+04 | 2.69E+04 |
| 4.39E+05 | 5.60E+05 | 5.04E+05 | 3.09E+05 | 6.51E+05 | 5.36E+05 | 0.66             | 5.29E-01 | 1.05E-01 | 0.87    | 5.85E-01 | 4.49E-01  | 4.12E+05 | 3.59E+05 |
| 4.38E+05 | 4.58E+05 | 4.09E+05 | 8.82E+05 | 7.77E+05 | 5.92E+05 | 0.68             | 6.01E-01 | 1.54E-01 | 0.87    | 5.94E-01 | 4.76E-01  | 4.91E+05 | 4.27E+05 |
| 1.91E+05 | 1.17E+05 | 8.94E+04 | 1.40E+05 | 2.52E+05 | 1.67E+05 | 0.64             | 6.42E-01 | 1.45E-01 | 0.87    | 7.13E-01 | 5.18E-01  | 1.29E+05 | 1.13E+05 |
| 2.89E+04 | 5.35E+04 | 4.92E+04 | 9.65E+04 | 4.20E+04 | 6.74E+04 | 0.68             | 6.68E-01 | 1.39E-01 | 0.87    | 7.51E-01 | 5.22E-01  | 4.61E+04 | 4.01E+04 |
| 2.93E+05 | 4.12E+05 | 4.23E+05 | 4.67E+05 | 4.45E+05 | 4.90E+05 | 0.67             | 4.74E-01 | 5.98E-02 | 0.87    | 4.68E-01 | 3.27E-01  | 3.45E+05 | 3.00E+05 |

14 Supplemental Table S2



| Accession # | Protein                                                          | # of Pep | PEPTIDE                                        | Modification                               | XCorr | Charge | m/z [Da] |
|-------------|------------------------------------------------------------------|----------|------------------------------------------------|--------------------------------------------|-------|--------|----------|
| 157057166   | Toll-like receptor 9                                             | 5        | FSAAASCSNITR                                   | Carbamidomethyl(7)Deamidated(9)            | 3.42  | 2      | 643.3    |
| 226437659   | Endoglin                                                         | 3        | QNGTETQEVFLVLSNK                               | Deamidated(2)                              | 3.29  | 3      | 636.3    |
| 31982236    | Integrin alpha 6                                                 | 3        | ANHSGAVVLLK                                    | Deamidated(2)                              | 3.87  | 2      | 555.3    |
| 226437629   | Embigin                                                          | 4        | YIINGSHANETR                                   | Deamidated(4)Deamidated(9)                 | 3.37  | 3      | 459.6    |
| 568926043   | Type XV collagen                                                 | 1        | EVDTDPENLTTTASGDGEVPTSTD<br>GDTEADSSPTGGPTLKPR | Deamidated(9)                              | 5.42  | 3      | 1439.3   |
| 568990242   | Oncostatin M receptor                                            | 3        | NLGPNTTSTTITSDDFKPGVR                          | Deamidated(5)                              | 4.36  | 3      | 741.4    |
| 226437659   | Endoglin                                                         | 3        | KLNASIVTSFVELPLVSNVSLR                         | Deamidated(3)Deamidated(18)                | 5.99  | 3      | 796.8    |
| 85861260    | ER membrane protein<br>complex subunit 1                         | 1        | FINYNQTVSR                                     | Deamidated(5)                              | 2.68  | 2      | 621.8    |
| 568987063   | stabilin-1                                                       | 7        | NSSITLPADSR                                    | Deamidated(1)                              | 3.07  | 2      | 581.3    |
| 568954529   | Protocadherin Fat 1                                              | 6        | INSSVTDVEEIIIGVR                               | Deamidated(2)                              | 4.22  | 2      | 816.4    |
| 568911950   | Hydroxysteroid 11-beta<br>dehydrogenase 1                        | 1        | QSNGLSIAVISSLAGK                               | Deamidated(3)                              | 3.26  | 2      | 716.9    |
| 226246610   | Alpha-mannosidase 2                                              | 3        | DSVINLSESVEDGPR                                | Deamidated(5)                              | 4.3   | 2      | 809.4    |
| 754170702   | Ectonucleoside triphosphate<br>diphosphohydrolase 1              | 2        | QETFGALDLGGASTQITFVPQNSTI<br>ESPENSLQFR        | Deamidated(22)                             | 6.14  | 4      | 946.7    |
| 124486680   | Integrin alpha L                                                 | 1        | GLFPDGSHELSTGNTSITPDK                          | Deamidated(13)                             | 4.4   | 3      | 691.7    |
| 568959112   | SID1 transmembrane family,<br>member 2                           | 2        | TYADDVNSELVNIYTFNHTVTR                         | Deamidated(17)                             | 5.92  | 3      | 858.4    |
| 111607447   | Integrin beta                                                    | 2        | LNFTGPGEPDSLRL                                 | Deamidated(2)                              | 2.66  | 2      | 701.9    |
| 298676452   | ATP-dependent (S)-NAD(P)H-<br>hydrate dehydratase                | 1        | LSQALGNITVVQK                                  | Deamidated(7)                              | 2.8   | 2      | 686.4    |
| 124249351   | Inter-alpha-trypsin inhibitor<br>heavy chain H1                  | 1        | ANLSSQVLK                                      | Deamidated(2)                              | 2.51  | 2      | 480.8    |
| 568960899   | Neuroplastin                                                     | 4        | KKENGVFEEISNSSGR                               | Deamidated(4)Deamidated(12)                | 4.47  | 2      | 891.9    |
| 568915418   | Prolyl endopeptidase FAP                                         | 4        | DILNGTFSYK                                     | Deamidated(4)                              | 2.78  | 2      | 579.8    |
| 568915418   | Prolyl endopeptidase FAP                                         | 4        | ESYIILSNSTMK                                   | Deamidated(8)Oxidation(11)                 | 3.17  | 2      | 701.8    |
| 124494256   | Pro-low-density lipoprotein<br>receptor-related protein 1        | 22       | IETILLNGTDR                                    | Deamidated(7)                              | 3.17  | 2      | 623.3    |
| 229608946   | Torsin-1A-interacting protein<br>1                               | 1        | HLNSSLPRPQPAILLLTAAQDAAEVL<br>K                | Deamidated(3)                              | 7.71  | 4      | 717.7    |
| 114326497   | Laminin subunit beta-1                                           | 6        | MEMPSTPQQLQNLTEDIRER                           | Deamidated(12)Oxidation(1)Oxidatio<br>n(3) | 4.58  | 3      | 817.1    |
| 85719301    | carcinoembryonic antigen-<br>related cell adhesion<br>molecule 1 | 4        | MTLSQNNNSILR                                   | Deamidated(6)Oxidation(1)                  | 3.61  | 2      | 647.3    |
| 568950756   | ADAMTS-like protein 3                                            | 3        | RINLTVGSR                                      | Deamidated(3)                              | 3.21  | 2      | 508.8    |
| 37674242    | Bone marrow stromal antigen                                      | 2        | NTTHLLQR                                       | Deamidated(1)                              | 2.76  | 2      | 492.3    |
| 19527206    | CD276 antigen                                                    | 3        | DGQGVPLTGNVTTSQMANER                           | Deamidated(10)Oxidation(16)                | 4.55  | 3      | 698.0    |
| 6754588     | Lymphocyte antigen 86                                            | 2        | ATVACANATVTSS                                  | Carbamidomethyl(5)Deamidated(7)            | 2.55  | 2      | 627.3    |

14 Supplemental Table S2

| MH+ [Da] | RT [min] | PSM | WT-1     | WT-2     | WT-3     | WT-4     | WT-5     | WT-5-2   | WT-6     | WT-7     | WT-8     | Null-1   | Null-2   |
|----------|----------|-----|----------|----------|----------|----------|----------|----------|----------|----------|----------|----------|----------|
| 1285.6   | 26.7     | 10  | 2.80E+05 | 2.35E+05 | 3.29E+05 | 5.60E+04 | 3.03E+05 | 2.79E+05 | 1.18E+05 | 1.76E+05 | 7.50E+04 | 8.87E+04 | 2.31E+05 |
| 1907.0   | 56.4     | 22  | 1.45E+05 | 1.64E+05 | 2.26E+05 | 6.81E+04 | 1.95E+05 | 1.99E+05 | 4.68E+04 | 1.11E+05 | 6.39E+04 | 5.01E+04 | 1.22E+05 |
| 1109.6   | 28.8     | 14  | 3.67E+05 | 3.81E+05 | 4.94E+05 | 0.00E+00 | 5.51E+05 | 4.56E+05 | 2.52E+05 | 2.32E+05 | 1.21E+05 | 1.31E+05 | 2.52E+05 |
| 1376.6   | 22.7     | 8   | 1.08E+05 | 1.08E+05 | 1.23E+05 | 1.26E+03 | 1.78E+05 | 1.26E+05 | 1.04E+05 | 9.52E+04 | 7.45E+04 | 2.69E+04 | 5.80E+04 |
| 4315.9   | 40.6     | 3   | 8.97E+04 | 1.20E+05 | 1.12E+05 | 2.74E+04 | 1.32E+05 | 1.17E+05 | 5.83E+04 | 9.28E+04 | 2.45E+04 | 4.61E+04 | 4.61E+04 |
| 2222.1   | 36.3     | 12  | 3.74E+05 | 3.85E+05 | 4.79E+05 | 1.76E+05 | 6.25E+05 | 5.25E+05 | 2.92E+05 | 3.74E+05 | 1.66E+05 | 1.51E+05 | 2.65E+05 |
| 2388.3   | 66.6     | 16  | 1.89E+05 | 3.48E+05 | 5.39E+05 | 1.37E+05 | 3.22E+05 | 2.65E+05 | 9.22E+04 | 3.38E+05 | 4.35E+04 | 1.52E+04 | 1.19E+05 |
| 1242.6   | 31.0     | 19  | 1.13E+06 | 9.46E+05 | 1.72E+06 | 5.39E+05 | 2.61E+06 | 2.20E+06 | 9.41E+05 | 1.16E+06 | 6.05E+05 | 6.48E+05 | 1.06E+06 |
| 1161.6   | 30.6     | 7   | 1.15E+05 | 9.31E+04 | 1.80E+05 | 6.72E+04 | 2.13E+05 | 1.62E+05 | 1.13E+05 | 1.07E+05 | 5.93E+04 | 4.43E+04 | 7.10E+04 |
| 1631.8   | 54.5     | 16  | 1.91E+05 | 2.44E+05 | 3.18E+05 | 9.49E+04 | 4.05E+05 | 3.01E+05 | 9.75E+04 | 2.11E+05 | 1.04E+05 | 9.98E+04 | 1.25E+05 |
| 1432.8   | 44.1     | 11  | 1.83E+05 | 9.39E+04 | 2.04E+05 | 9.69E+04 | 1.60E+05 | 1.59E+05 | 8.29E+04 | 1.11E+05 | 7.43E+04 | 3.33E+04 | 1.75E+05 |
| 1617.8   | 44.9     | 9   | 1.01E+05 | 1.52E+05 | 1.71E+05 | 6.97E+04 | 1.98E+05 | 1.74E+05 | 6.01E+04 | 1.40E+05 | 6.40E+04 | 4.68E+04 | 1.17E+05 |
| 3783.8   | 62.7     | 37  | 3.78E+05 | 3.23E+05 | 6.74E+05 | 2.07E+05 | 5.70E+05 | 6.65E+05 | 3.61E+04 | 3.49E+05 | 1.97E+05 | 1.03E+05 | 3.64E+05 |
| 2073.0   | 39.7     | 7   | 1.35E+05 | 1.07E+05 | 9.16E+04 | 8.97E+04 | 9.72E+04 | 1.14E+05 | 4.89E+04 | 1.11E+05 | 7.59E+04 | 2.93E+04 | 7.69E+04 |
| 2573.2   | 53.6     | 17  | 3.10E+05 | 4.95E+05 | 5.79E+05 | 2.35E+05 | 4.47E+05 | 4.37E+05 | 1.01E+05 | 2.93E+05 | 1.76E+05 | 1.14E+05 | 2.71E+05 |
| 1402.7   | 38.3     | 22  | 1.97E+06 | 2.66E+06 | 2.67E+06 | 1.43E+06 | 2.85E+06 | 2.63E+06 | 1.78E+06 | 1.62E+06 | 1.54E+06 | 7.30E+05 | 1.53E+06 |
| 1371.8   | 37.7     | 2   | 2.23E+05 | 2.73E+05 | 3.51E+05 | 1.42E+05 | 3.53E+05 | 3.00E+05 | 1.61E+05 | 2.09E+05 | 1.06E+05 | 1.13E+05 | 1.87E+05 |
| 960.5    | 30.1     | 9   | 1.04E+06 | 1.24E+06 | 1.63E+06 | 1.35E+06 | 2.04E+06 | 1.87E+06 | 1.31E+06 | 1.10E+06 | 1.34E+06 | 6.64E+05 | 9.75E+05 |
| 1782.9   | 29.2     | 27  | 1.17E+06 | 1.34E+06 | 1.92E+06 | 6.35E+05 | 2.00E+06 | 1.64E+06 | 9.67E+05 | 1.09E+06 | 5.62E+05 | 4.64E+05 | 8.86E+05 |
| 1158.6   | 47.7     | 4   | 1.93E+05 | 2.26E+05 | 2.99E+05 | 1.35E+05 | 2.65E+05 | 2.42E+05 | 1.55E+05 | 1.86E+05 | 1.33E+05 | 7.18E+04 | 1.60E+05 |
| 1402.7   | 37.6     | 14  | 4.45E+05 | 4.37E+05 | 5.38E+05 | 3.18E+05 | 5.34E+05 | 5.08E+05 | 2.93E+05 | 2.65E+05 | 2.31E+05 | 1.41E+05 | 3.69E+05 |
| 1245.7   | 41.5     | 51  | 2.79E+06 | 3.12E+06 | 4.35E+06 | 1.77E+06 | 4.76E+06 | 4.12E+06 | 2.69E+06 | 2.96E+06 | 1.96E+06 | 1.26E+06 | 2.07E+06 |
| 2867.6   | 66.0     | 105 | 1.41E+06 | 1.05E+06 | 1.76E+06 | 6.24E+05 | 2.05E+06 | 1.91E+06 | 6.36E+04 | 1.34E+06 | 5.06E+05 | 5.02E+05 | 6.33E+05 |
| 2449.1   | 42.1     | 17  | 4.89E+05 | 2.08E+05 | 8.90E+05 | 2.60E+05 | 9.88E+05 | 8.18E+05 | 1.11E+05 | 2.51E+05 | 2.04E+05 | 3.15E+05 | 1.63E+05 |
| 1293.6   | 31.3     | 25  | 6.68E+05 | 5.19E+05 | 9.88E+05 | 3.81E+05 | 1.60E+06 | 1.33E+06 | 5.55E+05 | 7.19E+05 | 5.50E+05 | 4.10E+05 | 6.48E+05 |
| 1016.6   | 25.5     | 2   | 2.17E+05 | 2.34E+05 | 2.31E+05 | 0.00E+00 | 3.62E+05 | 2.55E+05 | 1.20E+05 | 1.41E+05 | 5.48E+04 | 6.99E+04 | 1.31E+05 |
| 983.5    | 23.9     | 9   | 2.15E+05 | 2.41E+05 | 2.67E+05 | 9.00E+04 | 3.36E+05 | 2.98E+05 | 1.65E+05 | 1.77E+05 | 6.12E+04 | 7.76E+04 | 1.66E+05 |
| 2092.0   | 33.5     | 31  | 2.93E+05 | 3.73E+05 | 3.81E+05 | 2.04E+05 | 4.05E+05 | 4.56E+05 | 2.05E+05 | 2.85E+05 | 1.36E+05 | 9.18E+04 | 2.55E+05 |
| 1253.6   | 27.0     | 1   | 1.76E+05 | 1.19E+05 | 1.94E+05 | 4.95E+04 | 1.97E+05 | 1.64E+05 | 1.25E+05 | 1.17E+05 | 4.16E+04 | 3.40E+04 | 1.06E+05 |

14 Supplemental Table S2

| Null-3   | Null-4   | Null-5   | Null-6   | Null-7   | Null-8   | Ratio<br>Null/WT | SD       | p value  | N Ratio | N SD     | N p value | Avg_WT   | Avg_Null |
|----------|----------|----------|----------|----------|----------|------------------|----------|----------|---------|----------|-----------|----------|----------|
| 1.37E+05 | 9.70E+04 | 6.93E+04 | 1.64E+05 | 1.57E+05 | 1.47E+05 | 0.66             | 5.82E-01 | 9.96E-02 | 0.87    | 6.48E-01 | 4.61E-01  | 1.16E+05 | 1.01E+05 |
| 7.89E+04 | 6.30E+04 | 7.59E+04 | 1.30E+05 | 1.25E+05 | 8.20E+04 | 0.67             | 5.52E-01 | 9.49E-02 | 0.87    | 5.58E-01 | 4.08E-01  | 7.69E+04 | 6.68E+04 |
| 1.89E+05 | 1.77E+05 | 1.85E+05 | 2.65E+05 | 2.51E+05 | 2.13E+05 | 0.66             | 5.19E-01 | 1.14E-01 | 0.87    | 5.15E-01 | 4.31E-01  | 1.78E+05 | 1.55E+05 |
| 6.00E+04 | 5.45E+04 | 6.30E+04 | 1.08E+05 | 9.85E+04 | 1.00E+05 | 0.70             | 5.99E-01 | 1.21E-01 | 0.87    | 5.86E-01 | 4.16E-01  | 5.95E+04 | 5.17E+04 |
| 4.51E+04 | 6.32E+04 | 7.06E+04 | 4.33E+04 | 6.75E+04 | 6.72E+04 | 0.65             | 4.44E-01 | 6.09E-02 | 0.87    | 5.61E-01 | 4.23E-01  | 4.88E+04 | 4.24E+04 |
| 1.82E+05 | 2.26E+05 | 2.05E+05 | 3.51E+05 | 3.27E+05 | 3.24E+05 | 0.67             | 4.70E-01 | 5.21E-02 | 0.87    | 4.01E-01 | 2.66E-01  | 2.14E+05 | 1.86E+05 |
| 8.89E+04 | 7.76E+04 | 2.30E+05 | 3.20E+05 | 2.94E+05 | 2.66E+05 | 0.70             | 8.81E-01 | 2.63E-01 | 0.87    | 1.04E+00 | 6.34E-01  | 1.43E+05 | 1.24E+05 |
| 5.79E+05 | 7.22E+05 | 8.90E+05 | 9.99E+05 | 1.16E+06 | 8.04E+05 | 0.65             | 5.09E-01 | 9.61E-02 | 0.87    | 4.72E-01 | 3.62E-01  | 7.34E+05 | 6.37E+05 |
| 7.05E+04 | 5.97E+04 | 6.33E+04 | 1.38E+05 | 1.13E+05 | 9.86E+04 | 0.67             | 5.35E-01 | 6.67E-02 | 0.87    | 4.75E-01 | 3.01E-01  | 6.94E+04 | 6.01E+04 |
| 1.41E+05 | 1.55E+05 | 1.24E+05 | 1.58E+05 | 2.09E+05 | 1.35E+05 | 0.66             | 4.77E-01 | 7.95E-02 | 0.87    | 4.85E-01 | 3.63E-01  | 1.24E+05 | 1.07E+05 |
| 1.26E+05 | 8.13E+04 | 5.93E+04 | 6.29E+04 | 6.14E+04 | 7.72E+04 | 0.65             | 5.89E-01 | 6.49E-02 | 0.87    | 7.31E-01 | 5.07E-01  | 7.40E+04 | 6.41E+04 |
| 6.67E+04 | 6.59E+04 | 7.29E+04 | 8.90E+04 | 1.14E+05 | 1.10E+05 | 0.68             | 4.93E-01 | 6.49E-02 | 0.87    | 4.85E-01 | 3.41E-01  | 7.23E+04 | 6.25E+04 |
| 1.52E+05 | 2.18E+05 | 1.85E+05 | 3.85E+05 | 3.34E+05 | 3.04E+05 | 0.68             | 6.74E-01 | 1.65E-01 | 0.86    | 6.86E-01 | 4.82E-01  | 2.14E+05 | 1.85E+05 |
| 5.20E+04 | 7.28E+04 | 5.24E+04 | 9.53E+04 | 6.97E+04 | 9.64E+04 | 0.70             | 4.16E-01 | 2.54E-02 | 0.86    | 4.94E-01 | 3.22E-01  | 5.77E+04 | 4.99E+04 |
| 1.56E+05 | 2.30E+05 | 1.42E+05 | 3.46E+05 | 2.80E+05 | 3.24E+05 | 0.68             | 5.71E-01 | 9.94E-02 | 0.86    | 5.79E-01 | 4.04E-01  | 1.96E+05 | 1.69E+05 |
| 1.41E+06 | 1.30E+06 | 1.08E+06 | 2.07E+06 | 1.68E+06 | 1.75E+06 | 0.68             | 3.78E-01 | 1.26E-02 | 0.86    | 3.73E-01 | 1.78E-01  | 1.24E+06 | 1.06E+06 |
| 1.16E+05 | 1.40E+05 | 1.42E+05 | 1.80E+05 | 1.91E+05 | 1.68E+05 | 0.66             | 3.84E-01 | 3.00E-02 | 0.86    | 3.24E-01 | 1.95E-01  | 1.34E+05 | 1.15E+05 |
| 9.66E+05 | 8.22E+05 | 9.91E+05 | 1.26E+06 | 1.01E+06 | 1.05E+06 | 0.67             | 2.80E-01 | 3.37E-03 | 0.86    | 3.40E-01 | 1.72E-01  | 8.43E+05 | 7.25E+05 |
| 6.07E+05 | 8.17E+05 | 7.14E+05 | 1.09E+06 | 1.13E+06 | 9.30E+05 | 0.66             | 4.55E-01 | 4.62E-02 | 0.86    | 3.92E-01 | 2.30E-01  | 7.11E+05 | 6.11E+05 |
| 1.04E+05 | 1.58E+05 | 1.19E+05 | 1.80E+05 | 1.60E+05 | 1.46E+05 | 0.67             | 3.70E-01 | 1.31E-02 | 0.86    | 3.67E-01 | 1.73E-01  | 1.18E+05 | 1.02E+05 |
| 3.28E+05 | 2.55E+05 | 1.94E+05 | 2.62E+05 | 2.27E+05 | 2.87E+05 | 0.65             | 3.82E-01 | 1.22E-02 | 0.86    | 4.28E-01 | 2.32E-01  | 2.26E+05 | 1.94E+05 |
| 1.65E+06 | 2.14E+06 | 1.73E+06 | 3.01E+06 | 2.47E+06 | 2.68E+06 | 0.67             | 4.03E-01 | 2.28E-02 | 0.86    | 3.46E-01 | 1.60E-01  | 1.83E+06 | 1.57E+06 |
| 4.97E+05 | 5.71E+05 | 5.33E+05 | 1.61E+06 | 1.30E+06 | 7.53E+05 | 0.67             | 7.41E-01 | 1.75E-01 | 0.86    | 7.73E-01 | 5.02E-01  | 6.75E+05 | 5.79E+05 |
| 2.78E+05 | 1.60E+05 | 1.73E+05 | 7.31E+05 | 3.96E+05 | 1.27E+05 | 0.62             | 8.80E-01 | 2.10E-01 | 0.86    | 1.02E+00 | 6.02E-01  | 2.55E+05 | 2.18E+05 |
| 5.27E+05 | 4.24E+05 | 5.65E+05 | 6.57E+05 | 5.54E+05 | 4.10E+05 | 0.64             | 4.53E-01 | 7.29E-02 | 0.86    | 4.90E-01 | 3.27E-01  | 4.62E+05 | 3.96E+05 |
| 1.04E+05 | 1.17E+05 | 6.76E+04 | 1.45E+05 | 1.39E+05 | 1.55E+05 | 0.65             | 5.87E-01 | 1.36E-01 | 0.86    | 5.98E-01 | 4.43E-01  | 9.98E+04 | 8.56E+04 |
| 7.84E+04 | 1.28E+05 | 1.20E+05 | 1.82E+05 | 1.89E+05 | 1.32E+05 | 0.65             | 5.00E-01 | 5.90E-02 | 0.86    | 4.80E-01 | 3.01E-01  | 1.15E+05 | 9.84E+04 |
| 1.30E+05 | 1.84E+05 | 1.78E+05 | 2.97E+05 | 2.14E+05 | 2.77E+05 | 0.67             | 4.72E-01 | 3.79E-02 | 0.86    | 4.54E-01 | 2.51E-01  | 1.73E+05 | 1.49E+05 |
| 4.25E+04 | 9.99E+04 | 7.50E+04 | 1.15E+05 | 1.18E+05 | 1.04E+05 | 0.66             | 5.38E-01 | 6.80E-02 | 0.86    | 5.49E-01 | 3.40E-01  | 7.37E+04 | 6.31E+04 |

14 Supplemental Table S2

| Accession # | Protein                                                              | # of Pep | PEPTIDE                          | Modification                                  | XCorr | Charge | m/z [Da] |
|-------------|----------------------------------------------------------------------|----------|----------------------------------|-----------------------------------------------|-------|--------|----------|
| 59858563    | Extracellular matrix protein 2                                       | 1        | NNITSSGIGPK                      | Deamidated(1)                                 | 3.35  | 2      | 544.8    |
| 568909067   | Torsin-1A-interacting protein                                        | 1        | HLNASNPSEPATIIIFTAAR             | Deamidated(3)                                 | 5.27  | 3      | 671.0    |
| 568930638   | Basement membrane-specific heparan sulfate proteoglycan core protein | 8        | DQELEDNVHISPNGSIITIVGTRPSN HGAYR | Deamidated(13)                                | 5.42  | 4      | 848.4    |
| 225903442   | Integrin alpha-5                                                     | 6        | DKLSPIHIALNFSLDPK                | Deamidated(11)                                | 3.64  | 3      | 637.0    |
| 568948081   | Reticulocalbin-3                                                     | 2        | NATYGHYEPGEEFHDVEDAETYKK         | Deamidated(1)                                 | 7.25  | 4      | 708.3    |
| 568960103   | N-acetylated-alpha-linked acidic dipeptidase 2                       | 3        | SIAYINSDSAIEGNYTLR               | Deamidated(14)                                | 5.4   | 2      | 994.5    |
| 31542891    | Gamma-glutamyltransferase                                            | 2        | GDHHQLSHYNLTGVR                  | Deamidated(10)                                | 2.9   | 2      | 867.9    |
| 568947434   | Aminopeptidase N                                                     | 9        | FTCNQTTDVIIIHSK                  | Carbamidomethyl(3)Deamidated(4)               | 4.69  | 3      | 593.3    |
| 568915917   | Tyrosine-protein phosphatase non-receptor type substrate 1           | 5        | DGQELHPLETTVNPSPGKNVSYNISS TVR   | Deamidated(18)Deamidated(22)                  | 5.99  | 4      | 761.9    |
| 165932373   | Collectin-12                                                         | 4        | VQSLQTLAANNSALAK                 | Deamidated(10)                                | 4.09  | 2      | 815.4    |
| 31542362    | ADP-ribosyl cyclase 1                                                | 3        | EPFYKNSTFGSVEVFLDPNK             | Deamidated(6)                                 | 4.3   | 3      | 802.7    |
| 6677993     | Solute carrier family 12, member 4                                   | 1        | TVVVDNETVATR                     | Deamidated(6)                                 | 3.31  | 2      | 652.8    |
| 569008118   | Transmembrane protein 2                                              | 1        | GDPSIISVNGTDFTFR                 | Deamidated(9)                                 | 3.67  | 2      | 863.9    |
| 568954529   | Protocadherin Fat 1                                                  | 6        | GVNVITVNATDADSK                  | Deamidated(8)                                 | 4.61  | 2      | 752.9    |
| 568960103   | N-acetylated-alpha-linked acidic dipeptidase 2                       | 3        | GSLNVSYNIGPGFTGSEYSR             | Deamidated(4)                                 | 5.24  | 2      | 1053.5   |
| 568904237   | Fibrillin-2                                                          | 1        | SYNGTTCENELPFNVTK                | Carbamidomethyl(7)Deamidated(3)Deamidated(14) | 3.51  | 2      | 988.4    |
| 254028203   | GPI inositol-deacylase                                               | 2        | LHVAQPENDSHVALLK                 | Deamidated(8)                                 | 4.11  | 3      | 591.3    |
| 172072617   | Peptidyl-prolyl cis-trans isomerase FKBP9                            | 3        | YHYNGTLLDGTLDSSYSR               | Deamidated(4)                                 | 5.78  | 3      | 737.3    |
| 153792211   | Ectonucleotide pyrophosphatase/phosphodiesterase family member 1     | 3        | QLNLTTEDDDIYHMTVPYGRPR           | Deamidated(3)Oxidation(14)                    | 5.83  | 4      | 663.6    |
| 568922760   | Immunoglobulin superfamily member 10                                 | 6        | IHVYPNGSLVIGSVTEK                | Deamidated(6)                                 | 4.07  | 3      | 605.3    |
| 568972029   | C-type mannose receptor 2                                            | 6        | NASLAHVDPYPTQAFLTQAAR            | Deamidated(1)                                 | 7.45  | 3      | 758.1    |
| 568955184   | Cytokine receptor-like factor 1                                      | 2        | LLNTSTLALALANLNGSR               | Deamidated(3)Deamidated(15)                   | 4.2   | 3      | 615.3    |
| 124494256   | Prolow-density lipoprotein receptor-related protein 1                | 22       | FGHSPLINLTGGLSHASDVVLYHQH K      | Deamidated(8)                                 | 6.88  | 4      | 707.9    |
| 568950756   | ADAMTS-like protein 3                                                | 3        | GEHSFNSPGVFTVENTTIEFQK           | Deamidated(15)                                | 6.93  | 3      | 823.7    |
| 224809275   | Torsin-3A                                                            | 1        | ISNNLTGLESDLR                    | Deamidated(4)                                 | 4.13  | 2      | 716.9    |
| 392871558   | Receptor-type tyrosine-protein phosphatase C                         | 3        | AQNTNYTCVAEILYR                  | Carbamidomethyl(7)Deamidated(4)               | 4.64  | 2      | 851.9    |
| 568922258   | Sortilin                                                             | 2        | HLYTTTGGGETDFTNVTSLR             | Deamidated(14)                                | 6.91  | 3      | 705.3    |
| 133778978   | Cation-independent mannose-6-phosphate receptor                      | 12       | SLLEFNNTMGCPQSDSQHR              | Carbamidomethyl(11)Deamidated(6) Oxidation(9) | 4.49  | 3      | 742.3    |

14 Supplemental Table S2

| MH+ [Da] | RT [min] | PSM | WT-1     | WT-2     | WT-3     | WT-4     | WT-5     | WT-5-2   | WT-6     | WT-7     | WT-8     | Null-1   | Null-2   |
|----------|----------|-----|----------|----------|----------|----------|----------|----------|----------|----------|----------|----------|----------|
| 1088.6   | 25.9     | 5   | 4.38E+05 | 3.29E+05 | 7.09E+05 | 4.31E+03 | 1.13E+06 | 9.40E+05 | 5.57E+05 | 3.50E+05 | 1.86E+05 | 2.05E+05 | 4.53E+05 |
| 2011.0   | 43.9     | 25  | 9.54E+05 | 8.00E+05 | 1.28E+06 | 4.22E+05 | 1.68E+06 | 1.55E+06 | 5.50E+05 | 1.03E+06 | 5.29E+05 | 4.37E+05 | 7.80E+05 |
| 3390.7   | 42.3     | 7   | 1.14E+05 | 1.60E+05 | 8.05E+04 | 8.45E+04 | 2.26E+05 | 2.51E+05 | 3.04E+04 | 1.23E+05 | 8.05E+04 | 8.18E+04 | 1.34E+05 |
| 1909.0   | 51.4     | 5   | 3.38E+05 | 5.25E+05 | 6.27E+05 | 2.36E+05 | 6.94E+05 | 6.71E+05 | 2.34E+05 | 5.20E+05 | 2.08E+05 | 1.57E+05 | 3.78E+05 |
| 2830.2   | 32.9     | 52  | 1.94E+06 | 2.43E+06 | 2.41E+06 | 1.05E+06 | 3.31E+06 | 3.23E+06 | 8.24E+05 | 1.70E+06 | 7.85E+05 | 6.91E+05 | 1.02E+06 |
| 1988.0   | 45.2     | 46  | 4.92E+05 | 5.27E+05 | 5.81E+05 | 2.94E+05 | 7.92E+05 | 7.58E+05 | 1.93E+05 | 4.35E+05 | 2.44E+05 | 1.64E+05 | 5.02E+05 |
| 1734.8   | 24.6     | 3   | 2.96E+05 | 8.82E+04 | 1.46E+05 | 4.94E+02 | 2.34E+05 | 2.20E+05 | 1.02E+05 | 1.37E+05 | 8.66E+04 | 7.21E+04 | 1.07E+05 |
| 1777.9   | 35.0     | 26  | 1.48E+06 | 1.76E+06 | 2.36E+06 | 7.61E+05 | 1.73E+06 | 1.80E+06 | 1.13E+06 | 1.18E+06 | 6.84E+05 | 3.78E+05 | 1.14E+06 |
| 3044.5   | 40.2     | 9   | 1.31E+05 | 1.23E+05 | 1.42E+05 | 7.44E+04 | 1.90E+05 | 1.44E+05 | 6.39E+04 | 9.73E+04 | 6.23E+04 | 4.67E+04 | 6.91E+04 |
| 1629.9   | 38.3     | 26  | 2.74E+05 | 3.54E+05 | 3.46E+05 | 1.62E+05 | 3.97E+05 | 3.63E+05 | 2.32E+05 | 2.45E+05 | 1.46E+05 | 9.59E+04 | 1.56E+05 |
| 2406.2   | 52.0     | 8   | 1.56E+05 | 1.45E+05 | 2.19E+05 | 1.11E+05 | 2.66E+05 | 1.73E+05 | 3.95E+04 | 1.39E+05 | 9.30E+04 | 5.84E+04 | 8.13E+04 |
| 1304.7   | 28.6     | 18  | 4.19E+05 | 4.75E+05 | 6.31E+05 | 2.61E+05 | 8.89E+05 | 8.00E+05 | 3.52E+05 | 5.94E+05 | 2.33E+05 | 1.64E+05 | 3.86E+05 |
| 1726.8   | 53.6     | 17  | 1.65E+05 | 2.46E+05 | 3.58E+05 | 1.35E+05 | 3.49E+05 | 3.72E+05 | 7.72E+04 | 2.54E+05 | 1.29E+05 | 8.56E+04 | 1.96E+05 |
| 1504.7   | 34.7     | 17  | 2.53E+05 | 3.85E+05 | 3.91E+05 | 1.86E+05 | 4.48E+05 | 4.33E+05 | 2.43E+05 | 2.61E+05 | 1.32E+05 | 1.09E+05 | 2.22E+05 |
| 2106.0   | 46.2     | 31  | 4.47E+05 | 6.47E+05 | 8.70E+05 | 3.42E+05 | 7.50E+05 | 7.18E+05 | 2.12E+05 | 4.49E+05 | 2.57E+05 | 1.33E+05 | 5.11E+05 |
| 1975.9   | 43.9     | 23  | 1.59E+05 | 1.30E+05 | 3.75E+05 | 1.20E+05 | 5.50E+05 | 5.14E+05 | 2.08E+05 | 2.49E+05 | 9.80E+04 | 1.29E+05 | 2.23E+05 |
| 1771.9   | 29.8     | 1   | 1.95E+05 | 2.21E+05 | 3.32E+05 | 1.37E+05 | 4.17E+05 | 3.12E+05 | 1.65E+05 | 2.27E+05 | 9.48E+04 | 1.13E+05 | 1.86E+05 |
| 2210.0   | 50.4     | 36  | 1.98E+06 | 3.31E+06 | 3.10E+06 | 1.26E+06 | 3.03E+06 | 3.02E+06 | 9.55E+05 | 1.70E+06 | 1.26E+06 | 4.35E+05 | 1.37E+06 |
| 2651.2   | 38.4     | 6   | 1.11E+05 | 9.65E+04 | 1.47E+05 | 8.39E+04 | 1.33E+05 | 1.28E+05 | 2.74E+04 | 6.17E+04 | 3.50E+04 | 4.10E+04 | 4.93E+04 |
| 1814.0   | 41.5     | 4   | 4.90E+04 | 8.20E+04 | 9.21E+04 | 3.62E+04 | 1.92E+05 | 1.43E+05 | 4.24E+04 | 8.66E+04 | 3.26E+04 | 3.93E+04 | 5.16E+04 |
| 2272.1   | 49.3     | 21  | 3.50E+05 | 5.02E+05 | 6.59E+05 | 2.38E+05 | 5.25E+05 | 4.39E+05 | 2.07E+05 | 3.25E+05 | 2.03E+05 | 1.17E+05 | 2.16E+05 |
| 1844.0   | 66.2     | 54  | 2.06E+05 | 4.21E+05 | 4.49E+05 | 1.23E+05 | 4.54E+05 | 4.60E+05 | 4.43E+04 | 2.75E+05 | 1.32E+05 | 6.49E+04 | 2.31E+05 |
| 2828.4   | 44.9     | 39  | 1.09E+06 | 2.02E+06 | 2.40E+06 | 7.61E+05 | 1.94E+06 | 1.73E+06 | 5.16E+05 | 1.42E+06 | 7.43E+05 | 3.62E+05 | 1.26E+06 |
| 2469.2   | 45.7     | 13  | 1.90E+05 | 3.12E+05 | 3.09E+05 | 1.22E+05 | 3.88E+05 | 3.78E+05 | 7.05E+04 | 1.91E+05 | 8.47E+04 | 6.51E+04 | 1.80E+05 |
| 1432.7   | 43.4     | 12  | 4.65E+05 | 3.25E+05 | 5.31E+05 | 2.01E+05 | 7.08E+05 | 6.35E+05 | 2.03E+05 | 4.48E+05 | 1.68E+05 | 1.71E+05 | 3.67E+05 |
| 1702.8   | 49.5     | 24  | 4.08E+05 | 6.05E+05 | 4.82E+05 | 2.16E+05 | 4.29E+05 | 4.68E+05 | 3.10E+05 | 3.02E+05 | 2.44E+05 | 1.42E+05 | 2.55E+05 |
| 2114.0   | 39.7     | 17  | 1.56E+05 | 2.06E+05 | 2.40E+05 | 6.91E+04 | 3.43E+05 | 2.99E+05 | 1.10E+05 | 1.99E+05 | 1.15E+05 | 6.04E+04 | 1.42E+05 |
| 2225.0   | 36.1     | 22  | 4.59E+05 | 6.14E+05 | 8.58E+05 | 1.97E+05 | 8.30E+05 | 7.78E+05 | 3.42E+05 | 4.07E+05 | 2.21E+05 | 1.90E+05 | 3.88E+05 |

14 Supplemental Table S2

| Null-3   | Null-4   | Null-5   | Null-6   | Null-7   | Null-8   | Ratio<br>Null/WT | SD       | p value  | N Ratio | N SD     | N p value | Avg_WT   | Avg_Null |
|----------|----------|----------|----------|----------|----------|------------------|----------|----------|---------|----------|-----------|----------|----------|
| 2.16E+05 | 3.26E+05 | 2.70E+05 | 4.18E+05 | 3.76E+05 | 3.46E+05 | 0.63             | 6.16E-01 | 1.60E-01 | 0.86    | 6.22E-01 | 4.62E-01  | 2.82E+05 | 2.41E+05 |
| 5.31E+05 | 6.50E+05 | 5.57E+05 | 6.73E+05 | 9.05E+05 | 5.97E+05 | 0.66             | 4.55E-01 | 6.19E-02 | 0.86    | 4.34E-01 | 2.89E-01  | 5.58E+05 | 4.77E+05 |
| 6.85E+04 | 7.34E+04 | 5.14E+04 | 1.23E+05 | 7.59E+04 | 5.84E+04 | 0.65             | 6.02E-01 | 1.19E-01 | 0.85    | 6.89E-01 | 4.50E-01  | 7.35E+04 | 6.28E+04 |
| 2.36E+05 | 2.67E+05 | 2.33E+05 | 3.22E+05 | 4.37E+05 | 3.78E+05 | 0.67             | 5.02E-01 | 6.66E-02 | 0.85    | 4.88E-01 | 3.20E-01  | 2.58E+05 | 2.20E+05 |
| 8.69E+05 | 1.43E+06 | 8.69E+05 | 2.05E+06 | 1.80E+06 | 1.61E+06 | 0.66             | 5.77E-01 | 9.08E-02 | 0.85    | 5.67E-01 | 3.54E-01  | 1.11E+06 | 9.42E+05 |
| 1.71E+05 | 2.79E+05 | 2.57E+05 | 4.14E+05 | 3.92E+05 | 3.69E+05 | 0.66             | 5.46E-01 | 7.37E-02 | 0.85    | 5.36E-01 | 3.17E-01  | 2.73E+05 | 2.32E+05 |
| 5.58E+04 | 9.31E+04 | 9.35E+04 | 1.18E+05 | 1.25E+05 | 1.06E+05 | 0.66             | 5.71E-01 | 1.50E-01 | 0.85    | 5.82E-01 | 4.47E-01  | 8.38E+04 | 7.13E+04 |
| 5.01E+05 | 1.05E+06 | 6.17E+05 | 1.15E+06 | 1.17E+06 | 1.73E+06 | 0.68             | 5.67E-01 | 7.17E-02 | 0.85    | 5.62E-01 | 3.28E-01  | 8.19E+05 | 6.97E+05 |
| 4.68E+04 | 5.42E+04 | 6.85E+04 | 1.21E+05 | 1.15E+05 | 8.72E+04 | 0.67             | 5.08E-01 | 4.91E-02 | 0.85    | 4.47E-01 | 2.25E-01  | 6.52E+04 | 5.54E+04 |
| 1.14E+05 | 1.59E+05 | 1.69E+05 | 3.18E+05 | 2.60E+05 | 2.30E+05 | 0.67             | 4.88E-01 | 3.77E-02 | 0.85    | 4.55E-01 | 2.29E-01  | 1.61E+05 | 1.36E+05 |
| 9.59E+04 | 5.79E+04 | 8.92E+04 | 1.68E+05 | 1.48E+05 | 8.96E+04 | 0.66             | 5.64E-01 | 7.80E-02 | 0.85    | 5.65E-01 | 3.34E-01  | 8.54E+04 | 7.25E+04 |
| 2.11E+05 | 2.97E+05 | 3.59E+05 | 4.79E+05 | 4.65E+05 | 3.71E+05 | 0.66             | 5.09E-01 | 6.45E-02 | 0.85    | 4.97E-01 | 2.95E-01  | 2.94E+05 | 2.50E+05 |
| 1.41E+05 | 1.28E+05 | 1.33E+05 | 2.10E+05 | 1.78E+05 | 1.49E+05 | 0.66             | 4.89E-01 | 7.28E-02 | 0.85    | 5.08E-01 | 3.31E-01  | 1.33E+05 | 1.13E+05 |
| 1.58E+05 | 1.98E+05 | 1.77E+05 | 2.76E+05 | 2.34E+05 | 2.08E+05 | 0.65             | 4.11E-01 | 2.74E-02 | 0.85    | 3.80E-01 | 1.82E-01  | 1.72E+05 | 1.46E+05 |
| 1.63E+05 | 3.27E+05 | 2.71E+05 | 5.31E+05 | 4.70E+05 | 3.85E+05 | 0.67             | 5.93E-01 | 9.08E-02 | 0.85    | 6.06E-01 | 3.61E-01  | 2.97E+05 | 2.52E+05 |
| 9.30E+04 | 1.82E+05 | 1.00E+05 | 1.54E+05 | 2.37E+05 | 2.40E+05 | 0.64             | 6.33E-01 | 1.42E-01 | 0.85    | 6.44E-01 | 4.29E-01  | 1.47E+05 | 1.25E+05 |
| 1.17E+05 | 1.15E+05 | 1.02E+05 | 1.87E+05 | 1.88E+05 | 2.02E+05 | 0.65             | 4.68E-01 | 5.04E-02 | 0.85    | 4.07E-01 | 2.22E-01  | 1.31E+05 | 1.11E+05 |
| 8.66E+05 | 1.58E+06 | 1.39E+06 | 2.10E+06 | 1.83E+06 | 2.20E+06 | 0.67             | 5.65E-01 | 8.17E-02 | 0.85    | 5.90E-01 | 3.52E-01  | 1.26E+06 | 1.06E+06 |
| 3.87E+04 | 5.99E+04 | 4.51E+04 | 9.22E+04 | 9.07E+04 | 5.30E+04 | 0.64             | 5.34E-01 | 6.58E-02 | 0.85    | 5.20E-01 | 3.03E-01  | 5.10E+04 | 4.32E+04 |
| 3.02E+04 | 4.35E+04 | 4.19E+04 | 7.95E+04 | 8.98E+04 | 5.88E+04 | 0.65             | 6.60E-01 | 1.55E-01 | 0.85    | 6.33E-01 | 4.19E-01  | 4.68E+04 | 3.96E+04 |
| 1.68E+05 | 2.34E+05 | 1.80E+05 | 4.72E+05 | 4.32E+05 | 2.40E+05 | 0.67             | 6.09E-01 | 8.99E-02 | 0.85    | 6.12E-01 | 3.55E-01  | 2.20E+05 | 1.86E+05 |
| 2.47E+05 | 1.63E+05 | 1.26E+05 | 2.58E+05 | 1.82E+05 | 2.06E+05 | 0.65             | 6.07E-01 | 1.23E-01 | 0.85    | 7.32E-01 | 4.55E-01  | 1.63E+05 | 1.37E+05 |
| 7.93E+05 | 8.86E+05 | 5.80E+05 | 1.32E+06 | 1.36E+06 | 9.63E+05 | 0.67             | 5.73E-01 | 9.37E-02 | 0.85    | 6.11E-01 | 3.74E-01  | 8.10E+05 | 6.85E+05 |
| 1.40E+05 | 1.65E+05 | 9.00E+04 | 1.91E+05 | 1.76E+05 | 1.59E+05 | 0.64             | 5.47E-01 | 9.32E-02 | 0.84    | 5.92E-01 | 3.71E-01  | 1.27E+05 | 1.08E+05 |
| 1.73E+05 | 2.71E+05 | 2.25E+05 | 3.03E+05 | 3.04E+05 | 2.99E+05 | 0.64             | 4.79E-01 | 6.40E-02 | 0.84    | 4.76E-01 | 2.88E-01  | 2.31E+05 | 1.95E+05 |
| 1.98E+05 | 2.91E+05 | 1.91E+05 | 3.24E+05 | 3.12E+05 | 3.46E+05 | 0.67             | 4.10E-01 | 2.30E-02 | 0.84    | 4.26E-01 | 2.18E-01  | 2.25E+05 | 1.90E+05 |
| 1.10E+05 | 9.31E+04 | 1.13E+05 | 1.72E+05 | 1.61E+05 | 1.70E+05 | 0.66             | 5.20E-01 | 7.61E-02 | 0.84    | 4.89E-01 | 2.84E-01  | 1.11E+05 | 9.35E+04 |
| 2.41E+05 | 3.70E+05 | 2.66E+05 | 3.96E+05 | 4.49E+05 | 3.93E+05 | 0.64             | 4.92E-01 | 6.86E-02 | 0.84    | 4.62E-01 | 2.76E-01  | 2.94E+05 | 2.48E+05 |

14 Supplemental Table S2

| Accession # | Protein                                                          | # of Pep | PEPTIDE                             | Modification                                      | XCorr | Charge | m/z [Da] |
|-------------|------------------------------------------------------------------|----------|-------------------------------------|---------------------------------------------------|-------|--------|----------|
| 124486955   | Versican core protein                                            | 1        | FENQTCFPLPDSR                       | Carbamidomethyl(6)Deamidated(3)                   | 3.2   | 2      | 806.4    |
| 153792211   | Ectonucleotide pyrophosphatase/phosphodiesterase family member 1 | 3        | VYNGSVPFEER                         | Deamidated(3)                                     | 2.79  | 2      | 649.3    |
| 158711675   | Protein CASC4                                                    | 1        | LQNNISYQMADIHHLK                    | Deamidated(4)Oxidation(9)                         | 4.53  | 4      | 486.2    |
| 568915555   | Integrin alpha V                                                 | 4        | TAADATGLQPILNQFTPANVSR              | Deamidated(13)Deamidated(19)                      | 5.68  | 3      | 763.1    |
| 568936862   | Chemokine-like receptor 1                                        | 1        | ITCFNNFSLAAPESPSPHPAHSQVVS<br>TGYSR | Carbamidomethyl(3)Deamidated(6)                   | 4.92  | 3      | 1088.2   |
| 568987063   | stabilin-1                                                       | 7        | ELKGDGPFTVFVPHADLISNMSQDE<br>LAR    | Deamidated(20)Oxidation(21)                       | 4.12  | 3      | 1035.2   |
| 226823283   | Slit homolog 3 protein                                           | 2        | DLEILTLNNNNISR                      | Deamidated(11)                                    | 4.27  | 2      | 815.4    |
| 568938103   | Procollagen-lysine,2-oxoglutarate 5-dioxygenase 3                | 2        | FLQSAEFFNYTVR                       | Deamidated(9)                                     | 3.42  | 2      | 811.9    |
| 89242146    | Niemann Pick type C1                                             | 6        | LIASNITETMR                         | Deamidated(5)Oxidation(10)                        | 2.99  | 2      | 654.8    |
| 124487199   | Chondroitin sulfate synthase                                     | 1        | SLNSSEPLFLGQTGLGTTEEMGK             | Deamidated(3)Oxidation(21)                        | 4.51  | 3      | 805.1    |
| 226823283   | Slit homolog 3 protein                                           | 2        | SNLISCVSNDTFAGLSSVR                 | Carbamidomethyl(6)Deamidated(9)                   | 4.56  | 2      | 1014.5   |
| 94363330    | 60S ribosomal protein L29-                                       | 1        | SKNHHTTHNQSR                        | Deamidated(3)                                     | 2.62  | 2      | 656.3    |
| 13385294    | prenylcysteine oxidase 1                                         | 2        | GELNSTLFSSRPK                       | Deamidated(4)                                     | 3.81  | 2      | 718.9    |
| 568991301   | Plexin B2                                                        | 10       | AMSNISVR                            | Deamidated(4)Oxidation(2)                         | 2.47  | 2      | 447.7    |
| 755522163   | Integrin alpha-M                                                 | 8        | AIVASENNMSR                         | Deamidated(8)Oxidation(9)                         | 2.92  | 2      | 604.8    |
| 133778978   | Cation-independent mannose-6-phosphate receptor                  | 12       | YMNYTSLITFHCK                       | Carbamidomethyl(12)Deamidated(3)<br>Oxidation(2)  | 3.77  | 3      | 565.6    |
| 124494256   | Prolow-density lipoprotein receptor-related protein 1            | 22       | MHLNGSNVQVLHR                       | Deamidated(4)Oxidation(1)                         | 3.94  | 2      | 761.4    |
| 594140550   | Collagen type XII alpha-1                                        | 3        | EAGNITTDGYEILGK                     | Deamidated(4)                                     | 4.52  | 2      | 791.4    |
| 255308873   | Angiopoietin-related protein 4                                   | 1        | MTQLIGLTPNATHLHRPPR                 | Deamidated(10)Oxidation(1)                        | 3.72  | 3      | 724.1    |
| 268370173   | Peroxidasin homolog                                              | 4        | ILCDNSDNITR                         | Carbamidomethyl(3)Deamidated(8)                   | 3.18  | 2      | 661.3    |
| 165377206   | Translocon-associated protein subunit alpha                      | 2        | YPQDYQFYIQNFALPLNTVPPQR             | Deamidated(11)                                    | 4.45  | 3      | 1004.8   |
| 133778978   | Cation-independent mannose-6-phosphate receptor                  | 12       | AACAVRPQEVMTMVNGTLTNPVTGK           | Carbamidomethyl(3)Deamidated(14)<br>Oxidation(12) | 7.47  | 3      | 844.4    |
| 33859809    | Fibrinogen beta chain                                            | 2        | YKGTAGNALMDGASQLVGENR               | Carbamyl(2)Deamidated(20)Oxidation(10)            | 5.25  | 3      | 723.7    |
| 22203747    | Collagen alpha-2(VI) chain                                       | 6        | GTFTDCALANMTQQIR                    | Carbamidomethyl(6)Deamidated(10)<br>Oxidation(11) | 2.71  | 2      | 921.9    |
| 755534805   | N-acetylglucosamine-1-phosphotransferase                         | 4        | NPSTNVSVVFDTTKDVDAHAGP<br>FK        | Deamidated(1)                                     | 4.88  | 4      | 694.6    |
| 6755144     | Galectin-3-binding protein                                       | 3        | APIPTALDTNSSK                       | Deamidated(10)                                    | 3.61  | 2      | 658.3    |
| 529250188   | Angiotensin-converting                                           | 3        | TFDVSNFQNSSIK                       | Deamidated(9)                                     | 3.34  | 2      | 744.4    |

| MH+ [Da] | RT [min] | PSM | WT-1     | WT-2     | WT-3     | WT-4     | WT-5     | WT-5-2   | WT-6     | WT-7     | WT-8     | Null-1   | Null-2   |
|----------|----------|-----|----------|----------|----------|----------|----------|----------|----------|----------|----------|----------|----------|
| 1611.7   | 41.7     | 14  | 7.52E+04 | 1.23E+05 | 1.61E+05 | 6.94E+04 | 2.89E+05 | 2.33E+05 | 9.72E+04 | 8.67E+04 | 1.11E+05 | 5.37E+04 | 7.40E+04 |
| 1297.6   | 35.0     | 16  | 1.20E+06 | 1.48E+06 | 1.86E+06 | 9.00E+05 | 1.41E+06 | 1.41E+06 | 6.29E+05 | 9.49E+05 | 5.02E+05 | 3.99E+05 | 8.67E+05 |
| 1941.9   | 28.4     | 4   | 9.66E+04 | 9.53E+04 | 1.11E+05 | 5.88E+04 | 1.20E+05 | 1.07E+05 | 5.02E+04 | 7.01E+04 | 2.62E+04 | 2.91E+04 | 5.81E+04 |
| 2287.2   | 51.6     | 94  | 1.78E+05 | 3.78E+05 | 3.95E+05 | 1.20E+05 | 3.54E+05 | 3.03E+05 | 1.06E+05 | 2.56E+05 | 1.08E+05 | 9.54E+04 | 1.74E+05 |
| 3262.5   | 38.7     | 9   | 1.97E+05 | 2.59E+05 | 4.12E+05 | 1.20E+05 | 3.34E+05 | 3.61E+05 | 1.47E+05 | 1.91E+05 | 9.08E+04 | 7.01E+04 | 2.18E+05 |
| 3103.5   | 51.1     | 23  | 4.23E+05 | 3.91E+05 | 9.17E+05 | 2.52E+05 | 7.58E+05 | 6.58E+05 | 1.58E+05 | 3.40E+05 | 2.25E+05 | 1.87E+05 | 2.52E+05 |
| 1629.8   | 52.1     | 16  | 2.81E+05 | 2.59E+05 | 2.73E+05 | 1.77E+05 | 4.14E+05 | 3.37E+05 | 1.75E+05 | 2.39E+05 | 1.52E+05 | 1.09E+05 | 2.27E+05 |
| 1622.8   | 52.3     | 28  | 7.32E+05 | 1.68E+06 | 1.71E+06 | 9.82E+05 | 2.18E+06 | 2.08E+06 | 4.85E+05 | 1.08E+06 | 7.86E+05 | 4.26E+05 | 9.96E+05 |
| 1308.6   | 50.4     | 20  | 1.46E+06 | 1.75E+06 | 2.04E+06 | 5.01E+05 | 2.15E+06 | 2.04E+06 | 1.35E+06 | 1.15E+06 | 6.22E+05 | 4.48E+05 | 1.07E+06 |
| 2413.1   | 50.3     | 22  | 1.61E+05 | 1.94E+05 | 2.40E+05 | 9.84E+04 | 2.10E+05 | 1.93E+05 | 7.33E+04 | 1.47E+05 | 7.22E+04 | 5.18E+04 | 1.01E+05 |
| 2028.0   | 53.5     | 15  | 6.41E+04 | 1.17E+05 | 2.11E+05 | 3.97E+04 | 1.90E+05 | 1.73E+05 | 6.72E+04 | 1.48E+05 | 7.79E+04 | 5.36E+04 | 1.16E+05 |
| 1311.6   | 15.7     | 2   | 2.59E+04 | 2.35E+04 | 0.00E+00 | 1.66E+02 | 4.38E+04 | 0.00E+00 | 6.62E+03 | 3.05E+04 | 4.53E+02 | 2.23E+02 | 1.63E+03 |
| 1436.7   | 34.6     | 25  | 3.95E+05 | 1.52E+05 | 4.31E+05 | 1.62E+05 | 5.96E+05 | 5.63E+05 | 1.31E+05 | 2.61E+05 | 1.33E+05 | 1.77E+05 | 1.59E+05 |
| 894.4    | 21.1     | 2   | 5.80E+05 | 4.60E+05 | 5.82E+05 | 1.91E+02 | 7.85E+05 | 7.29E+05 | 4.10E+05 | 3.92E+05 | 2.04E+05 | 1.16E+05 | 1.45E+05 |
| 1208.6   | 19.8     | 21  | 4.90E+05 | 5.42E+05 | 5.66E+05 | 4.89E+02 | 6.82E+05 | 6.19E+05 | 4.27E+05 | 4.08E+05 | 3.35E+05 | 1.25E+05 | 2.84E+05 |
| 1694.8   | 41.9     | 13  | 1.53E+05 | 1.80E+05 | 3.63E+05 | 9.07E+04 | 3.33E+05 | 2.95E+05 | 9.64E+04 | 1.47E+05 | 7.47E+04 | 6.50E+04 | 1.22E+05 |
| 1521.8   | 24.0     | 37  | 1.94E+06 | 1.81E+06 | 2.10E+06 | 3.10E+03 | 3.07E+06 | 2.73E+06 | 1.95E+06 | 1.42E+06 | 8.73E+05 | 5.75E+05 | 1.16E+06 |
| 1581.8   | 42.4     | 60  | 4.38E+06 | 5.08E+06 | 9.25E+06 | 4.83E+06 | 1.15E+07 | 1.01E+07 | 3.45E+06 | 6.64E+06 | 2.66E+06 | 3.34E+06 | 5.22E+06 |
| 2170.2   | 31.4     | 15  | 1.25E+05 | 2.58E+05 | 1.39E+05 | 9.49E+04 | 1.92E+05 | 1.39E+05 | 6.14E+04 | 5.29E+04 | 7.95E+04 | 3.19E+04 | 7.11E+04 |
| 1321.6   | 27.6     | 18  | 7.30E+05 | 6.71E+05 | 1.20E+06 | 3.78E+05 | 1.08E+06 | 9.09E+05 | 4.59E+05 | 4.63E+05 | 2.51E+05 | 2.79E+05 | 6.60E+05 |
| 3012.5   | 66.0     | 177 | 2.50E+06 | 3.65E+06 | 5.69E+06 | 1.57E+06 | 5.94E+06 | 5.24E+06 | 3.06E+05 | 4.25E+06 | 1.70E+06 | 8.63E+05 | 3.33E+06 |
| 2531.3   | 36.4     | 19  | 4.10E+05 | 5.49E+05 | 9.21E+05 | 2.19E+05 | 8.15E+05 | 8.18E+05 | 3.39E+05 | 3.77E+05 | 1.74E+05 | 1.91E+05 | 4.39E+05 |
| 2169.0   | 31.6     | 337 | 3.06E+05 | 2.79E+05 | 3.97E+05 | 5.95E+05 | 4.22E+05 | 2.85E+05 | 9.45E+04 | 2.35E+05 | 1.42E+05 | 1.85E+05 | 1.46E+05 |
| 1842.9   | 36.9     | 143 | 8.85E+06 | 8.43E+06 | 1.54E+07 | 6.52E+06 | 2.73E+07 | 2.59E+07 | 1.07E+07 | 1.15E+07 | 5.49E+06 | 5.60E+06 | 1.03E+07 |
| 2775.4   | 48.5     | 3   | 8.58E+04 | 4.42E+04 | 1.20E+05 | 4.39E+04 | 1.50E+05 | 1.24E+05 | 9.85E+03 | 3.18E+04 | 1.42E+04 | 2.69E+04 | 4.40E+04 |
| 1315.7   | 33.0     | 24  | 1.42E+06 | 1.04E+06 | 1.80E+06 | 6.08E+05 | 2.31E+06 | 2.18E+06 | 8.75E+05 | 1.07E+06 | 4.84E+05 | 4.55E+05 | 9.32E+05 |
| 1487.7   | 40.0     | 8   | 3.62E+05 | 2.73E+05 | 5.64E+05 | 2.73E+05 | 6.52E+05 | 6.02E+05 | 4.34E+05 | 3.38E+05 | 2.84E+05 | 1.55E+05 | 3.16E+05 |

14 Supplemental Table S2



| Null-3   | Null-4   | Null-5   | Null-6   | Null-7   | Null-8   | Ratio<br>Null/WT | SD       | p value  | N Ratio | N SD     | N p value | Avg_WT   | Avg_Null |
|----------|----------|----------|----------|----------|----------|------------------|----------|----------|---------|----------|-----------|----------|----------|
| 9.68E+04 | 1.03E+05 | 7.60E+04 | 1.26E+05 | 7.44E+04 | 1.02E+05 | 0.64             | 5.16E-01 | 9.01E-02 | 0.84    | 5.68E-01 | 3.45E-01  | 7.88E+04 | 6.64E+04 |
| 4.71E+05 | 8.63E+05 | 5.24E+05 | 8.25E+05 | 1.10E+06 | 9.81E+05 | 0.66             | 4.74E-01 | 3.88E-02 | 0.84    | 4.59E-01 | 2.27E-01  | 6.54E+05 | 5.50E+05 |
| 4.04E+04 | 5.01E+04 | 3.39E+04 | 6.88E+04 | 8.49E+04 | 5.71E+04 | 0.65             | 4.79E-01 | 3.73E-02 | 0.84    | 4.45E-01 | 2.12E-01  | 4.59E+04 | 3.86E+04 |
| 1.41E+05 | 1.87E+05 | 1.02E+05 | 1.96E+05 | 2.26E+05 | 1.53E+05 | 0.65             | 5.05E-01 | 7.42E-02 | 0.84    | 5.57E-01 | 3.49E-01  | 1.41E+05 | 1.18E+05 |
| 1.16E+05 | 1.58E+05 | 1.33E+05 | 1.35E+05 | 1.58E+05 | 2.10E+05 | 0.64             | 5.15E-01 | 6.55E-02 | 0.84    | 5.34E-01 | 3.00E-01  | 1.32E+05 | 1.11E+05 |
| 3.32E+05 | 1.91E+05 | 2.39E+05 | 4.81E+05 | 3.71E+05 | 2.64E+05 | 0.63             | 5.80E-01 | 1.03E-01 | 0.84    | 6.23E-01 | 3.73E-01  | 2.57E+05 | 2.15E+05 |
| 1.57E+05 | 1.13E+05 | 1.25E+05 | 2.47E+05 | 2.26E+05 | 1.31E+05 | 0.65             | 4.36E-01 | 2.13E-02 | 0.84    | 4.16E-01 | 1.66E-01  | 1.47E+05 | 1.23E+05 |
| 7.59E+05 | 8.74E+05 | 6.33E+05 | 1.14E+06 | 8.63E+05 | 1.06E+06 | 0.65             | 4.89E-01 | 6.61E-02 | 0.84    | 4.91E-01 | 2.80E-01  | 7.43E+05 | 6.23E+05 |
| 6.73E+05 | 8.63E+05 | 7.92E+05 | 1.44E+06 | 1.13E+06 | 1.12E+06 | 0.65             | 4.87E-01 | 4.73E-02 | 0.84    | 4.55E-01 | 2.23E-01  | 8.21E+05 | 6.89E+05 |
| 8.84E+04 | 9.81E+04 | 9.22E+04 | 1.30E+05 | 1.17E+05 | 1.23E+05 | 0.65             | 4.17E-01 | 3.33E-02 | 0.84    | 4.10E-01 | 2.10E-01  | 8.84E+04 | 7.41E+04 |
| 5.45E+04 | 6.32E+04 | 5.06E+04 | 1.08E+05 | 1.05E+05 | 9.11E+04 | 0.66             | 5.70E-01 | 1.03E-01 | 0.84    | 5.86E-01 | 3.56E-01  | 7.03E+04 | 5.87E+04 |
| 9.72E+03 | 2.15E+04 | 1.88E+02 | 5.25E+03 | 3.67E+04 | 3.43E+03 | 0.68             | 1.66E+00 | 5.21E-01 | 0.84    | 1.96E+00 | 7.57E-01  | 8.39E+03 | 7.01E+03 |
| 1.66E+05 | 1.53E+05 | 1.86E+05 | 3.16E+05 | 2.63E+05 | 1.31E+05 | 0.62             | 5.68E-01 | 9.98E-02 | 0.84    | 6.09E-01 | 3.61E-01  | 1.74E+05 | 1.45E+05 |
| 2.22E+05 | 3.35E+05 | 2.71E+05 | 5.25E+05 | 3.88E+05 | 3.81E+05 | 0.65             | 6.46E-01 | 1.14E-01 | 0.84    | 6.70E-01 | 3.76E-01  | 2.60E+05 | 2.17E+05 |
| 2.69E+05 | 2.52E+05 | 2.39E+05 | 4.96E+05 | 3.88E+05 | 3.73E+05 | 0.67             | 5.48E-01 | 7.87E-02 | 0.83    | 5.55E-01 | 3.02E-01  | 2.65E+05 | 2.21E+05 |
| 1.01E+05 | 1.36E+05 | 9.23E+04 | 1.48E+05 | 1.69E+05 | 1.35E+05 | 0.63             | 5.32E-01 | 9.35E-02 | 0.83    | 5.21E-01 | 3.18E-01  | 1.07E+05 | 8.92E+04 |
| 9.00E+05 | 1.14E+06 | 8.99E+05 | 1.65E+06 | 1.25E+06 | 1.52E+06 | 0.64             | 5.34E-01 | 8.55E-02 | 0.83    | 5.05E-01 | 2.84E-01  | 1.00E+06 | 8.35E+05 |
| 2.75E+06 | 5.03E+06 | 2.18E+06 | 3.15E+06 | 5.47E+06 | 5.28E+06 | 0.63             | 5.14E-01 | 6.23E-02 | 0.83    | 5.35E-01 | 2.80E-01  | 3.61E+06 | 3.01E+06 |
| 1.91E+05 | 4.23E+04 | 4.77E+04 | 5.90E+04 | 7.62E+04 | 1.17E+05 | 0.63             | 7.35E-01 | 1.19E-01 | 0.83    | 1.07E+00 | 5.66E-01  | 7.29E+04 | 6.08E+04 |
| 3.00E+05 | 4.69E+05 | 2.95E+05 | 4.21E+05 | 4.34E+05 | 5.50E+05 | 0.62             | 4.96E-01 | 5.44E-02 | 0.83    | 5.06E-01 | 2.54E-01  | 3.79E+05 | 3.16E+05 |
| 1.63E+06 | 2.09E+06 | 1.65E+06 | 2.80E+06 | 2.97E+06 | 2.65E+06 | 0.66             | 6.28E-01 | 1.36E-01 | 0.83    | 6.67E-01 | 4.02E-01  | 1.97E+06 | 1.64E+06 |
| 2.06E+05 | 3.24E+05 | 2.35E+05 | 3.43E+05 | 4.27E+05 | 4.25E+05 | 0.63             | 5.40E-01 | 8.32E-02 | 0.83    | 5.26E-01 | 2.99E-01  | 2.85E+05 | 2.37E+05 |
| 3.15E+05 | 1.51E+05 | 1.25E+05 | 2.46E+05 | 1.81E+05 | 1.27E+05 | 0.60             | 5.13E-01 | 5.02E-02 | 0.83    | 6.89E-01 | 3.70E-01  | 1.72E+05 | 1.43E+05 |
| 5.03E+06 | 7.22E+06 | 6.90E+06 | 9.90E+06 | 9.78E+06 | 1.20E+07 | 0.62             | 5.64E-01 | 1.08E-01 | 0.83    | 5.17E-01 | 3.10E-01  | 7.37E+06 | 6.12E+06 |
| 4.48E+04 | 2.75E+04 | 3.32E+04 | 5.37E+04 | 7.31E+04 | 2.65E+04 | 0.59             | 6.80E-01 | 1.55E-01 | 0.83    | 7.79E-01 | 4.70E-01  | 3.69E+04 | 3.06E+04 |
| 5.36E+05 | 8.49E+05 | 6.02E+05 | 1.18E+06 | 1.02E+06 | 1.02E+06 | 0.63             | 5.18E-01 | 6.78E-02 | 0.83    | 4.76E-01 | 2.37E-01  | 7.28E+05 | 6.03E+05 |
| 1.89E+05 | 2.49E+05 | 2.76E+05 | 3.98E+05 | 3.22E+05 | 2.46E+05 | 0.64             | 4.12E-01 | 2.05E-02 | 0.83    | 3.71E-01 | 1.12E-01  | 2.40E+05 | 1.99E+05 |

14 Supplemental Table S2

| Accession # | Protein                                                        | # of Pep | PEPTIDE                                    | Modification                                       | XCorr | Charge | m/z [Da] |
|-------------|----------------------------------------------------------------|----------|--------------------------------------------|----------------------------------------------------|-------|--------|----------|
| 568996104   | Coiled-coil domain-containing protein 80                       | 1        | ISVVTIFGPVNNSSMK                           | Deamidated(12)Oxidation(15)                        | 3.64  | 2      | 855.4    |
| 568920948   | Protocadherin Fat 4                                            | 3        | YQNVSGFSNVNINR                             | Deamidated(3)                                      | 3.8   | 2      | 806.9    |
| 568920137   | Laminin subunit alpha-5                                        | 15       | IVPLENGEIVVSLVNGRPGALNFSYS<br>PLLK         | Deamidated(6)Deamidated(15)Deamidated(22)          | 3.64  | 3      | 1076.3   |
| 224922773   | Olfactomedin-like protein 2B                                   | 2        | NANISYAFDTHNTQIVPR                         | Deamidated(3)                                      | 5.97  | 3      | 721.7    |
| 568995622   | Target of Nesh-SH3                                             | 2        | SIQITNQTFSTVENLKPDTSYEFQVK<br>PK           | Deamidated(6)                                      | 5.41  | 4      | 811.7    |
| 23956366    | Peptidyl-prolyl cis-trans isomerase FKBP14                     | 1        | HGAVVNESHHDALVEDIFDKEDEDK<br>DGFISAR       | Deamidated(6)                                      | 9.41  | 5      | 719.9    |
| 31981716    | Histocompatibility 2, class II antigen A, alpha                | 1        | RSNSTPATNEAPQATVFPK                        | Deamidated(3)                                      | 5.08  | 3      | 673.0    |
| 122937370   | Multimerin-2                                                   | 4        | QVEELLVNHTGLR                              | Deamidated(8)                                      | 2.99  | 2      | 754.9    |
| 568934359   | protocadherin 7                                                | 1        | IDNLTGELSTSER                              | Deamidated(3)                                      | 3.89  | 2      | 718.4    |
| 568926396   | Tenascin                                                       | 12       | NFFIQVLEADTTQTQVQLTVPGGLR                  | Deamidated(1)Deamidated(17)                        | 3.12  | 2      | 1381.7   |
| 568941620   | Glucoside xylosyltransferase 2                                 | 2        | HPFYGSAGVNSGVMLMNLTR                       | Deamidated(17)Oxidation(14)Oxidation(16)           | 5.98  | 3      | 728.7    |
| 568976251   | Microfibril-associated glycoprotein 4                          | 2        | RFNGSVSFFR                                 | Deamidated(3)                                      | 3.33  | 2      | 609.3    |
| 755546876   | Interleukin-3 receptor subunit alpha                           | 1        | FHHGLLGYTLQVNQSSR                          | Deamidated(13)                                     | 5.47  | 3      | 653.3    |
| 754170702   | Ectonucleoside triphosphate diphosphohydrolase 1               | 2        | VNVSELYGTPCTK                              | Carbamidomethyl(12)Deamidated(3)                   | 3.54  | 2      | 784.4    |
| 6753484     | Collagen alpha-1(VI) chain                                     | 5        | ENYAELDDGFLKNITAIQICIDK                    | Carbamidomethyl(20)Deamidated(14)                  | 5.68  | 3      | 895.4    |
| 568908031   | Prolargin                                                      | 3        | IHYLYLQNNFITEPLESFQATGLR                   | Deamidated(21)                                     | 8.08  | 3      | 1032.5   |
| 568923623   | Translocon-associated protein subunit beta                     | 2        | AGYFNFTSATITYLAQEDGPVVIGST<br>SAPGQGGILAQR | Deamidated(5)                                      | 6.57  | 3      | 1287.0   |
| 568972029   | C-type mannose receptor 2                                      | 6        | GTDPSPSPAAATPPAPGAELSYLN<br>HTFR           | Deamidated(25)                                     | 7.53  | 3      | 984.8    |
| 10946680    | Fibromodulin                                                   | 3        | LYLDHNNLTR                                 | Deamidated(6)Deamidated(7)                         | 3.97  | 3      | 420.6    |
| 133778978   | Cation-independent mannose-6-phosphate receptor                | 12       | TQYACPPFNVTECSVQDAAGNSIDL<br>SSLSR         | Carbamidomethyl(5)Carbamidomethyl(13)Deamidated(9) | 3.87  | 3      | 1096.8   |
| 167555029   | Fibrinogen, alpha polypeptide                                  | 1        | MDGSLNFNR                                  | Deamidated(8)Oxidation(1)                          | 2.63  | 2      | 535.7    |
| 150378458   | Disintegrin and metalloproteinase domain-containing protein 10 | 1        | INTTSDEKDPTNPFR                            | Deamidated(2)                                      | 5.02  | 3      | 579.3    |
| 568915418   | Prolyl endopeptidase FAP                                       | 4        | DDNLEHYKNSTVMAR                            | Deamidated(9)Oxidation(13)                         | 4.41  | 3      | 603.9    |
| 31982236    | Integrin alpha 6                                               | 3        | YQTLNCSVNVR                                | Carbamidomethyl(6)Deamidated(5)                    | 2.75  | 2      | 677.8    |
| 568917853   | Calcitonin gene-related peptide type 1 receptor                | 1        | IMQDPIQQAEGLYCNR                           | Carbamidomethyl(14)Deamidated(15)Oxidation(2)      | 4.17  | 2      | 976.9    |

| MH+ [Da] | RT [min] | PSM | WT-1     | WT-2     | WT-3     | WT-4     | WT-5     | WT-5-2   | WT-6     | WT-7     | WT-8     | Null-1   | Null-2   |
|----------|----------|-----|----------|----------|----------|----------|----------|----------|----------|----------|----------|----------|----------|
| 1709.9   | 51.5     | 26  | 3.72E+05 | 7.87E+05 | 5.74E+05 | 3.12E+05 | 6.31E+05 | 5.24E+05 | 1.85E+05 | 3.42E+05 | 2.10E+05 | 2.41E+05 | 3.29E+05 |
| 1612.8   | 36.2     | 9   | 5.55E+04 | 7.32E+04 | 9.80E+04 | 3.24E+04 | 1.19E+05 | 1.15E+05 | 4.29E+04 | 7.16E+04 | 3.26E+04 | 3.21E+04 | 3.72E+04 |
| 3226.7   | 67.5     | 4   | 4.36E+04 | 6.13E+04 | 2.30E+05 | 2.09E+04 | 7.29E+04 | 6.91E+04 | 1.43E+04 | 7.97E+04 | 9.91E+03 | 5.93E+03 | 3.02E+04 |
| 2163.0   | 39.5     | 15  | 1.27E+05 | 1.96E+05 | 2.08E+05 | 1.06E+05 | 2.13E+05 | 2.00E+05 | 3.49E+04 | 1.62E+05 | 6.31E+04 | 4.14E+04 | 1.25E+05 |
| 3243.6   | 46.7     | 12  | 9.24E+04 | 1.20E+05 | 2.65E+05 | 1.70E+05 | 2.54E+05 | 2.74E+05 | 3.63E+04 | 2.57E+05 | 7.73E+04 | 6.50E+04 | 2.30E+05 |
| 3595.7   | 39.7     | 25  | 6.79E+04 | 1.45E+05 | 1.40E+05 | 8.05E+04 | 1.66E+05 | 1.61E+05 | 3.00E+04 | 5.16E+04 | 5.96E+04 | 2.72E+04 | 5.03E+04 |
| 2017.0   | 30.0     | 3   | 1.45E+05 | 7.20E+04 | 1.07E+05 | 5.90E+04 | 9.80E+04 | 8.92E+04 | 5.01E+04 | 8.66E+04 | 2.41E+04 | 2.72E+04 | 8.21E+04 |
| 1508.8   | 37.1     | 12  | 1.29E+05 | 1.27E+05 | 1.58E+05 | 5.69E+04 | 2.57E+05 | 2.05E+05 | 5.50E+04 | 6.75E+04 | 4.56E+04 | 5.42E+04 | 9.63E+04 |
| 1435.7   | 36.0     | 1   | 2.87E+05 | 3.79E+05 | 4.18E+05 | 2.45E+05 | 5.60E+05 | 5.29E+05 | 1.90E+05 | 3.37E+05 | 1.68E+05 | 1.46E+05 | 2.58E+05 |
| 2762.4   | 74.2     | 145 | 1.06E+06 | 1.11E+05 | 1.96E+05 | 1.73E+06 | 7.45E+04 | 1.67E+06 | 8.04E+03 | 3.56E+06 | 6.74E+05 | 3.38E+05 | 7.16E+05 |
| 2184.0   | 39.0     | 32  | 3.85E+05 | 3.90E+05 | 5.02E+05 | 3.04E+05 | 5.74E+05 | 5.81E+05 | 1.37E+05 | 4.41E+05 | 1.50E+05 | 1.35E+05 | 3.34E+05 |
| 1217.6   | 37.8     | 21  | 7.16E+05 | 8.55E+05 | 1.74E+06 | 6.18E+05 | 2.83E+06 | 2.82E+06 | 7.39E+05 | 1.28E+06 | 5.06E+05 | 6.16E+05 | 6.47E+05 |
| 1958.0   | 34.7     | 10  | 1.13E+05 | 4.59E+04 | 1.66E+05 | 9.33E+04 | 4.03E+05 | 3.53E+05 | 1.27E+05 | 1.63E+05 | 8.77E+04 | 5.39E+04 | 1.16E+05 |
| 1567.8   | 39.3     | 11  | 6.84E+05 | 7.33E+05 | 1.05E+06 | 4.97E+05 | 1.32E+06 | 1.17E+06 | 6.70E+05 | 5.99E+05 | 4.45E+05 | 2.79E+05 | 6.62E+05 |
| 2684.3   | 66.5     | 21  | 2.03E+05 | 2.33E+05 | 7.74E+05 | 1.71E+05 | 4.87E+05 | 4.69E+05 | 8.56E+04 | 3.75E+05 | 5.33E+04 | 3.20E+04 | 6.75E+04 |
| 3095.6   | 65.0     | 64  | 2.17E+05 | 2.73E+05 | 5.27E+05 | 1.72E+05 | 4.00E+05 | 3.13E+05 | 6.19E+04 | 3.47E+05 | 5.29E+04 | 2.75E+04 | 6.81E+04 |
| 3858.9   | 69.8     | 73  | 6.59E+05 | 8.71E+05 | 1.43E+06 | 3.68E+05 | 9.55E+05 | 8.13E+05 | 6.10E+03 | 8.96E+05 | 2.93E+05 | 1.75E+05 | 5.91E+05 |
| 2952.4   | 50.4     | 45  | 4.38E+06 | 8.07E+06 | 7.75E+06 | 3.53E+06 | 6.54E+06 | 6.28E+06 | 2.44E+06 | 4.71E+06 | 2.93E+06 | 1.65E+06 | 3.28E+06 |
| 1259.6   | 29.8     | 70  | 2.73E+05 | 3.42E+05 | 7.40E+05 | 2.45E+05 | 7.15E+05 | 6.58E+05 | 1.93E+05 | 3.45E+05 | 9.16E+04 | 1.62E+05 | 3.12E+05 |
| 3288.5   | 55.5     | 10  | 9.43E+04 | 1.93E+05 | 2.76E+05 | 6.72E+04 | 2.21E+05 | 2.17E+05 | 4.70E+04 | 1.12E+05 | 5.36E+04 | 4.47E+04 | 1.25E+05 |
| 1070.5   | 27.5     | 12  | 3.09E+05 | 5.32E+05 | 4.98E+05 | 9.91E+05 | 5.32E+05 | 4.92E+05 | 2.42E+05 | 3.70E+05 | 2.97E+05 | 3.02E+05 | 3.06E+05 |
| 1735.8   | 29.3     | 34  | 5.15E+05 | 4.41E+05 | 7.25E+05 | 2.44E+05 | 9.04E+05 | 8.08E+05 | 4.33E+05 | 4.81E+05 | 2.49E+05 | 1.80E+05 | 3.62E+05 |
| 1809.8   | 23.8     | 9   | 9.06E+04 | 1.10E+05 | 1.10E+05 | 0.00E+00 | 1.10E+05 | 1.15E+05 | 7.72E+04 | 6.79E+04 | 4.68E+04 | 2.42E+04 | 6.39E+04 |
| 1354.6   | 30.2     | 11  | 3.19E+05 | 2.98E+05 | 3.92E+05 | 1.01E+05 | 5.75E+05 | 5.31E+05 | 2.70E+05 | 2.42E+05 | 1.46E+05 | 1.48E+05 | 2.26E+05 |
| 1952.9   | 42.4     | 14  | 7.92E+04 | 7.35E+04 | 1.40E+05 | 3.36E+04 | 1.95E+05 | 1.63E+05 | 6.80E+04 | 6.26E+04 | 3.29E+04 | 3.19E+04 | 8.76E+04 |

14 Supplemental Table S2

| Null-3   | Null-4   | Null-5   | Null-6   | Null-7   | Null-8   | Ratio<br>Null/WT | SD       | p value  | N Ratio | N SD     | N p value | Avg_WT   | Avg_Null |
|----------|----------|----------|----------|----------|----------|------------------|----------|----------|---------|----------|-----------|----------|----------|
| 2.38E+05 | 2.80E+05 | 2.06E+05 | 3.09E+05 | 2.85E+05 | 3.29E+05 | 0.63             | 3.98E-01 | 4.70E-02 | 0.83    | 4.56E-01 | 2.80E-01  | 2.51E+05 | 2.08E+05 |
| 4.04E+04 | 4.25E+04 | 3.32E+04 | 5.68E+04 | 6.01E+04 | 5.86E+04 | 0.63             | 4.62E-01 | 5.31E-02 | 0.83    | 4.22E-01 | 2.15E-01  | 4.03E+04 | 3.34E+04 |
| 2.28E+04 | 1.50E+04 | 4.19E+04 | 9.57E+04 | 9.10E+04 | 5.17E+04 | 0.66             | 1.16E+00 | 3.88E-01 | 0.83    | 1.32E+00 | 6.47E-01  | 3.74E+04 | 3.09E+04 |
| 7.20E+04 | 8.73E+04 | 5.89E+04 | 1.16E+05 | 1.09E+05 | 1.51E+05 | 0.65             | 5.49E-01 | 7.06E-02 | 0.83    | 5.74E-01 | 3.03E-01  | 8.35E+04 | 6.91E+04 |
| 3.64E+04 | 1.22E+05 | 7.51E+04 | 1.07E+05 | 1.39E+05 | 1.20E+05 | 0.65             | 6.94E-01 | 1.31E-01 | 0.83    | 8.31E-01 | 4.55E-01  | 9.86E+04 | 8.16E+04 |
| 6.06E+04 | 6.41E+04 | 5.16E+04 | 1.10E+05 | 8.23E+04 | 6.21E+04 | 0.63             | 5.77E-01 | 8.61E-02 | 0.83    | 6.14E-01 | 3.29E-01  | 5.66E+04 | 4.68E+04 |
| 1.49E+04 | 5.58E+04 | 3.63E+04 | 7.82E+04 | 8.19E+04 | 4.60E+04 | 0.65             | 6.03E-01 | 7.69E-02 | 0.83    | 6.82E-01 | 3.59E-01  | 4.61E+04 | 3.81E+04 |
| 7.32E+04 | 5.83E+04 | 5.29E+04 | 1.04E+05 | 7.88E+04 | 7.67E+04 | 0.61             | 5.23E-01 | 9.27E-02 | 0.83    | 5.36E-01 | 3.07E-01  | 6.71E+04 | 5.54E+04 |
| 2.04E+05 | 2.16E+05 | 2.11E+05 | 2.42E+05 | 2.31E+05 | 2.22E+05 | 0.63             | 3.48E-01 | 2.43E-02 | 0.83    | 3.50E-01 | 1.36E-01  | 1.97E+05 | 1.62E+05 |
| 6.89E+05 | 7.17E+05 | 4.18E+05 | 1.29E+06 | 1.06E+05 | 1.56E+06 | 0.72             | 1.32E+00 | 5.24E-01 | 0.83    | 1.53E+00 | 7.12E-01  | 6.48E+05 | 5.35E+05 |
| 1.12E+05 | 2.58E+05 | 1.72E+05 | 2.76E+05 | 3.72E+05 | 3.33E+05 | 0.65             | 5.31E-01 | 5.50E-02 | 0.82    | 5.39E-01 | 2.55E-01  | 2.19E+05 | 1.80E+05 |
| 4.43E+05 | 8.06E+05 | 7.20E+05 | 1.45E+06 | 1.21E+06 | 7.56E+05 | 0.62             | 6.69E-01 | 1.48E-01 | 0.82    | 6.94E-01 | 3.98E-01  | 7.40E+05 | 6.10E+05 |
| 7.43E+04 | 1.26E+05 | 1.49E+05 | 5.85E+04 | 6.48E+04 | 1.95E+05 | 0.61             | 7.27E-01 | 1.58E-01 | 0.82    | 8.27E-01 | 4.51E-01  | 9.52E+04 | 7.84E+04 |
| 3.47E+05 | 5.54E+05 | 3.68E+05 | 6.43E+05 | 6.03E+05 | 5.72E+05 | 0.63             | 4.32E-01 | 2.64E-02 | 0.82    | 3.71E-01 | 1.02E-01  | 4.50E+05 | 3.71E+05 |
| 7.92E+04 | 7.50E+04 | 2.92E+05 | 3.37E+05 | 4.49E+05 | 3.13E+05 | 0.65             | 9.77E-01 | 2.64E-01 | 0.82    | 1.13E+00 | 5.69E-01  | 1.75E+05 | 1.44E+05 |
| 6.87E+04 | 7.90E+04 | 1.56E+05 | 3.94E+05 | 3.62E+05 | 2.43E+05 | 0.67             | 9.36E-01 | 2.43E-01 | 0.82    | 1.06E+00 | 5.36E-01  | 1.48E+05 | 1.21E+05 |
| 3.25E+05 | 3.66E+05 | 2.74E+05 | 6.90E+05 | 7.10E+05 | 5.41E+05 | 0.66             | 6.85E-01 | 1.55E-01 | 0.82    | 7.34E-01 | 4.11E-01  | 4.04E+05 | 3.31E+05 |
| 2.56E+06 | 3.32E+06 | 2.54E+06 | 4.89E+06 | 4.73E+06 | 3.97E+06 | 0.65             | 4.76E-01 | 4.06E-02 | 0.82    | 4.82E-01 | 2.18E-01  | 3.00E+06 | 2.46E+06 |
| 8.59E+04 | 4.75E+05 | 9.46E+04 | 1.67E+05 | 3.07E+05 | 3.42E+05 | 0.61             | 7.08E-01 | 1.18E-01 | 0.82    | 8.66E-01 | 4.46E-01  | 2.19E+05 | 1.79E+05 |
| 5.29E+04 | 1.05E+05 | 6.90E+04 | 1.10E+05 | 1.18E+05 | 8.57E+04 | 0.62             | 5.87E-01 | 1.07E-01 | 0.82    | 6.36E-01 | 3.47E-01  | 7.97E+04 | 6.51E+04 |
| 4.05E+05 | 2.49E+05 | 2.32E+05 | 3.43E+05 | 2.08E+05 | 2.46E+05 | 0.60             | 4.23E-01 | 3.81E-02 | 0.82    | 5.82E-01 | 2.67E-01  | 2.71E+05 | 2.21E+05 |
| 2.57E+05 | 3.20E+05 | 3.16E+05 | 4.27E+05 | 4.12E+05 | 3.85E+05 | 0.62             | 4.29E-01 | 3.57E-02 | 0.82    | 3.68E-01 | 1.27E-01  | 3.01E+05 | 2.45E+05 |
| 3.93E+04 | 4.99E+04 | 4.19E+04 | 5.83E+04 | 6.02E+04 | 7.90E+04 | 0.64             | 5.15E-01 | 6.53E-02 | 0.81    | 5.08E-01 | 2.40E-01  | 4.68E+04 | 3.81E+04 |
| 1.67E+05 | 2.20E+05 | 1.65E+05 | 2.10E+05 | 2.57E+05 | 1.58E+05 | 0.61             | 4.26E-01 | 4.76E-02 | 0.81    | 4.20E-01 | 1.73E-01  | 1.79E+05 | 1.45E+05 |
| 3.83E+04 | 5.30E+04 | 4.73E+04 | 5.57E+04 | 8.46E+04 | 5.77E+04 | 0.61             | 5.83E-01 | 9.99E-02 | 0.81    | 5.81E-01 | 2.94E-01  | 5.15E+04 | 4.19E+04 |

14 Supplemental Table S2

| Accession # | Protein                                                   | # of Pep | PEPTIDE                        | Modification                                                            | XCorr | Charge | m/z [Da] |
|-------------|-----------------------------------------------------------|----------|--------------------------------|-------------------------------------------------------------------------|-------|--------|----------|
| 569001628   | Inactive tyrosine-protein kinase 7                        | 3        | AVVFANGSLLLTQVRPR              | Deamidated(6)                                                           | 4.72  | 3      | 614.7    |
| 568971816   | Intercellular adhesion molecule 2                         | 6        | INCSTNCAAPDMGGLETPTNK          | Carbamidomethyl(3)Carbamidomethyl(7)Deamidated(2)Oxidation(12)          | 3.17  | 3      | 756.7    |
| 170784829   | Procollagen galactosyltransferase 1                       | 2        | AMNTSQVEAMGIQMLPGYR            | Deamidated(3)Oxidation(2)Oxidation(10)Oxidation(14)                     | 4.45  | 2      | 1073.5   |
| 6753066     | Membrane primary amine oxidase                            | 2        | YLYLASNHSNK                    | Deamidated(7)                                                           | 2.61  | 2      | 655.8    |
| 165932373   | Collectin-12                                              | 4        | SKLDTEVANLSVVMEEK              | Deamidated(9)Oxidation(14)Oxidation(17)                                 | 4.45  | 3      | 686.0    |
| 164565411   | Collagen alpha-1(V)                                       | 3        | KNVTLILDCK                     | Carbamidomethyl(9)Deamidated(2)                                         | 3.46  | 2      | 602.8    |
| 568931034   | Endothelin-converting enzyme 1                            | 3        | QVSTLINNTDK                    | Deamidated(7)                                                           | 3.1   | 2      | 617.3    |
| 568915555   | Integrin alpha V                                          | 4        | ENQNHSYSLK                     | Deamidated(4)                                                           | 3.11  | 2      | 610.8    |
| 568947434   | Aminopeptidase N                                          | 9        | NATLVNEADKLR                   | Deamidated(1)                                                           | 2.99  | 2      | 672.9    |
| 755498697   | Fibrillin-1                                               | 5        | NYADNQTCDGELLFNMTK             | Carbamidomethyl(9)Deamidated(1)Deamidated(6)Deamidated(16)Oxidation(17) | 4.47  | 2      | 1157.5   |
| 568909422   | hemocentin 1                                              | 2        | GANSDLPEEVTVLVNK               | Deamidated(15)                                                          | 3.17  | 2      | 843.4    |
| 117606385   | Protein disulfide-isomerase TMX3                          | 1        | LVAIAVIDEKNTSLEHTR             | Deamidated(11)                                                          | 6.21  | 3      | 670.7    |
| 124494256   | Prolow-density lipoprotein receptor-related protein 1     | 22       | DNATDSVPLR                     | Deamidated(2)                                                           | 2.74  | 2      | 544.8    |
| 225903442   | Integrin alpha-5                                          | 6        | HPGNFSSLSCDYFAVNQSR            | Carbamidomethyl(10)Deamidated(4)Deamidated(16)                          | 5.41  | 3      | 730.0    |
| 568987063   | stabilin-1                                                | 7        | NVTAASAEFGYK                   | Deamidated(1)                                                           | 3.1   | 2      | 629.8    |
| 568987678   | Gamma-sarcoglycan                                         | 2        | SRVDSSLLQSTQNVTVSAR            | Deamidated(14)                                                          | 5.29  | 3      | 721.4    |
| 120407045   | Matrilin-2                                                | 1        | AIGSEPHKDHVFLVANFSQIESLTSVFQNK | Deamidated(16)                                                          | 5.19  | 4      | 836.7    |
| 568909511   | ER degradation-enhancing alpha-mannosidase-like protein 3 | 1        | LLPAFNNTSGLPYPR                | Deamidated(6)                                                           | 3.4   | 2      | 824.4    |
| 6680878     | Lysosome membrane protein                                 | 7        | ANIQFGENGTTISAVTNK             | Deamidated(8)                                                           | 4.14  | 2      | 933.5    |
| 124494256   | Prolow-density lipoprotein receptor-related protein 1     | 22       | VNRFNSTEYQVVTR                 | Deamidated(5)                                                           | 3.78  | 3      | 572.0    |
| 124494256   | Prolow-density lipoprotein receptor-related protein 1     | 22       | LNGTDPIVAADSK                  | Deamidated(2)                                                           | 3.87  | 2      | 651.3    |
| 568926396   | Tenascin                                                  | 12       | HFVVQVQEANNVEAAQNLTVPGLSR      | Deamidated(17)                                                          | 8.14  | 3      | 907.8    |
| 124286805   | Complement C1q subcomponent subunit A                     | 1        | VLTNQESPYQNHTGR                | Deamidated(11)                                                          | 5.75  | 3      | 582.3    |

14 Supplemental Table S2

| MH+ [Da] | RT [min] | PSM | WT-1     | WT-2     | WT-3     | WT-4     | WT-5     | WT-5-2   | WT-6     | WT-7     | WT-8     | Null-1   | Null-2   |
|----------|----------|-----|----------|----------|----------|----------|----------|----------|----------|----------|----------|----------|----------|
| 1842.1   | 48.9     | 7   | 3.43E+05 | 5.59E+05 | 8.25E+05 | 3.45E+05 | 6.52E+05 | 4.94E+05 | 1.48E+05 | 5.40E+05 | 2.44E+05 | 9.11E+04 | 4.21E+05 |
| 2268.0   | 28.5     | 8   | 8.62E+04 | 3.62E+04 | 1.21E+05 | 2.62E+04 | 1.68E+05 | 1.39E+05 | 6.08E+04 | 4.73E+04 | 2.58E+04 | 3.01E+04 | 7.94E+04 |
| 2146.0   | 38.1     | 60  | 1.73E+06 | 2.21E+06 | 2.70E+06 | 1.53E+06 | 3.14E+06 | 3.03E+06 | 1.27E+06 | 2.01E+06 | 1.09E+06 | 9.21E+05 | 1.30E+06 |
| 1310.6   | 26.5     | 18  | 1.09E+06 | 5.86E+05 | 5.60E+05 | 2.67E+04 | 9.34E+05 | 7.60E+05 | 4.12E+05 | 4.23E+05 | 2.57E+05 | 1.61E+05 | 3.36E+05 |
| 2056.0   | 37.8     | 8   | 3.15E+05 | 3.51E+05 | 4.16E+05 | 1.47E+05 | 4.66E+05 | 4.34E+05 | 1.83E+05 | 3.08E+05 | 1.37E+05 | 9.81E+04 | 2.07E+05 |
| 1204.7   | 31.3     | 10  | 1.11E+05 | 9.00E+04 | 1.75E+05 | 3.22E+04 | 2.64E+05 | 2.37E+05 | 5.77E+04 | 7.30E+04 | 2.13E+04 | 6.38E+04 | 7.97E+04 |
| 1233.6   | 28.8     | 13  | 1.67E+05 | 1.44E+05 | 1.61E+05 | 9.61E+04 | 2.44E+05 | 2.14E+05 | 1.32E+05 | 1.17E+05 | 7.71E+04 | 4.53E+04 | 8.09E+04 |
| 1220.6   | 19.4     | 10  | 3.12E+05 | 2.77E+05 | 3.12E+05 | 2.38E+03 | 3.81E+05 | 1.75E+04 | 2.72E+05 | 1.84E+05 | 6.97E+04 | 5.12E+04 | 1.10E+05 |
| 1344.7   | 32.8     | 25  | 4.70E+05 | 6.02E+05 | 5.68E+05 | 2.13E+05 | 5.52E+05 | 5.51E+05 | 3.55E+05 | 3.71E+05 | 1.94E+05 | 1.37E+05 | 2.40E+05 |
| 2314.0   | 43.7     | 278 | 4.65E+06 | 5.14E+06 | 9.42E+06 | 3.38E+06 | 1.39E+07 | 1.32E+07 | 5.71E+06 | 6.57E+06 | 2.10E+06 | 3.26E+06 | 5.89E+06 |
| 1685.9   | 48.4     | 4   | 8.85E+04 | 6.35E+04 | 3.14E+05 | 2.79E+05 | 1.75E+05 | 1.95E+05 | 1.45E+05 | 6.48E+04 | 3.76E+04 | 5.37E+04 | 2.18E+04 |
| 2010.1   | 37.0     | 38  | 1.20E+06 | 1.18E+06 | 1.95E+06 | 6.25E+05 | 2.08E+06 | 1.97E+06 | 4.72E+05 | 1.06E+06 | 4.84E+05 | 4.98E+05 | 9.51E+05 |
| 1088.5   | 29.6     | 16  | 2.82E+05 | 2.52E+05 | 2.87E+05 | 1.61E+05 | 4.20E+05 | 3.78E+05 | 2.50E+05 | 2.50E+05 | 1.63E+05 | 8.44E+04 | 1.57E+05 |
| 2187.9   | 44.0     | 17  | 2.53E+05 | 3.54E+05 | 4.78E+05 | 1.42E+05 | 5.58E+05 | 4.48E+05 | 2.27E+05 | 2.76E+05 | 1.82E+05 | 9.61E+04 | 2.59E+05 |
| 1258.6   | 38.5     | 9   | 1.01E+05 | 6.14E+04 | 1.23E+05 | 4.03E+04 | 1.42E+05 | 1.52E+05 | 7.54E+04 | 7.77E+04 | 5.24E+04 | 2.77E+04 | 4.57E+04 |
| 2162.1   | 40.4     | 11  | 1.54E+05 | 4.93E+04 | 2.02E+05 | 7.19E+04 | 2.54E+05 | 2.45E+05 | 1.43E+03 | 1.05E+05 | 4.08E+04 | 6.56E+04 | 9.52E+04 |
| 3343.7   | 56.7     | 6   | 5.51E+04 | 1.05E+05 | 1.85E+05 | 9.23E+04 | 1.87E+05 | 1.04E+05 | 1.03E+04 | 1.56E+05 | 4.61E+04 | 3.26E+04 | 5.10E+04 |
| 1647.9   | 51.3     | 21  | 2.12E+05 | 3.48E+05 | 4.96E+05 | 1.79E+05 | 5.61E+05 | 4.76E+05 | 1.97E+05 | 4.08E+05 | 2.52E+05 | 9.55E+04 | 2.87E+05 |
| 1865.9   | 39.7     | 40  | 2.20E+06 | 2.66E+06 | 3.37E+06 | 1.33E+06 | 4.20E+06 | 4.07E+06 | 1.42E+06 | 2.75E+06 | 1.17E+06 | 9.79E+05 | 2.18E+06 |
| 1713.9   | 30.4     | 2   | 1.32E+05 | 6.66E+04 | 1.02E+05 | 9.37E+04 | 1.63E+05 | 1.49E+05 | 5.26E+04 | 6.14E+04 | 5.17E+04 | 3.68E+04 | 9.20E+04 |
| 1301.7   | 31.9     | 22  | 1.35E+06 | 1.88E+06 | 2.28E+06 | 9.24E+05 | 2.04E+06 | 1.75E+06 | 1.35E+06 | 1.25E+06 | 7.06E+05 | 4.53E+05 | 9.04E+05 |
| 2721.4   | 44.9     | 347 | 9.15E+04 | 5.90E+04 | 1.14E+05 | 9.18E+04 | 1.30E+05 | 1.92E+05 | 3.76E+04 | 1.27E+05 | 4.50E+04 | 4.00E+04 | 1.31E+05 |
| 1744.8   | 21.9     | 100 | 1.07E+05 | 4.60E+04 | 1.33E+05 | 0.00E+00 | 2.24E+05 | 2.11E+05 | 5.21E+04 | 7.81E+04 | 1.30E+04 | 2.74E+04 | 3.12E+04 |

14 Supplemental Table S2

| Null-3   | Null-4   | Null-5   | Null-6   | Null-7   | Null-8   | Ratio<br>Null/WT | SD       | p value  | N Ratio | N SD     | N p value | Avg_WT   | Avg_Null |
|----------|----------|----------|----------|----------|----------|------------------|----------|----------|---------|----------|-----------|----------|----------|
| 2.48E+05 | 2.70E+05 | 1.77E+05 | 4.49E+05 | 4.05E+05 | 3.37E+05 | 0.65             | 5.72E-01 | 7.49E-02 | 0.81    | 6.20E-01 | 2.97E-01  | 2.67E+05 | 2.17E+05 |
| 2.63E+04 | 3.94E+04 | 4.84E+04 | 5.33E+04 | 5.41E+04 | 4.44E+04 | 0.60             | 6.06E-01 | 1.15E-01 | 0.81    | 6.58E-01 | 3.50E-01  | 4.26E+04 | 3.47E+04 |
| 9.67E+05 | 1.19E+06 | 1.21E+06 | 1.58E+06 | 1.92E+06 | 1.35E+06 | 0.63             | 3.84E-01 | 1.68E-02 | 0.81    | 3.17E-01 | 8.10E-02  | 1.19E+06 | 9.67E+05 |
| 2.01E+05 | 2.82E+05 | 3.27E+05 | 5.00E+05 | 4.66E+05 | 5.97E+05 | 0.64             | 6.47E-01 | 1.27E-01 | 0.81    | 6.49E-01 | 3.42E-01  | 3.18E+05 | 2.59E+05 |
| 1.34E+05 | 1.39E+05 | 1.79E+05 | 2.54E+05 | 2.65E+05 | 2.87E+05 | 0.64             | 4.86E-01 | 3.96E-02 | 0.81    | 4.49E-01 | 1.68E-01  | 1.75E+05 | 1.42E+05 |
| 6.85E+04 | 6.29E+04 | 3.26E+04 | 6.62E+04 | 7.62E+04 | 9.76E+04 | 0.58             | 5.89E-01 | 1.35E-01 | 0.81    | 6.84E-01 | 4.03E-01  | 6.30E+04 | 5.12E+04 |
| 8.44E+04 | 7.03E+04 | 9.17E+04 | 1.58E+05 | 1.18E+05 | 1.04E+05 | 0.63             | 4.48E-01 | 2.07E-02 | 0.81    | 3.94E-01 | 9.72E-02  | 8.50E+04 | 6.91E+04 |
| 9.15E+04 | 1.20E+05 | 1.08E+05 | 1.96E+05 | 1.79E+05 | 1.82E+05 | 0.64             | 6.93E-01 | 1.74E-01 | 0.81    | 7.17E-01 | 4.08E-01  | 1.16E+05 | 9.40E+04 |
| 1.45E+05 | 2.47E+05 | 1.84E+05 | 5.04E+05 | 4.90E+05 | 2.79E+05 | 0.65             | 5.66E-01 | 5.29E-02 | 0.81    | 5.69E-01 | 2.35E-01  | 2.47E+05 | 2.00E+05 |
| 2.35E+06 | 5.21E+06 | 2.86E+06 | 4.53E+06 | 5.92E+06 | 4.27E+06 | 0.60             | 5.45E-01 | 8.38E-02 | 0.81    | 5.73E-01 | 2.82E-01  | 3.91E+06 | 3.17E+06 |
| 1.08E+05 | 6.71E+04 | 4.51E+04 | 9.63E+04 | 1.32E+05 | 1.98E+05 | 0.60             | 7.58E-01 | 1.34E-01 | 0.81    | 8.77E-01 | 4.39E-01  | 8.11E+04 | 6.57E+04 |
| 6.15E+05 | 6.05E+05 | 6.02E+05 | 1.08E+06 | 9.34E+05 | 7.07E+05 | 0.61             | 4.94E-01 | 6.35E-02 | 0.81    | 4.79E-01 | 2.22E-01  | 6.84E+05 | 5.54E+05 |
| 1.21E+05 | 1.78E+05 | 1.34E+05 | 2.72E+05 | 2.29E+05 | 2.09E+05 | 0.64             | 4.29E-01 | 1.57E-02 | 0.81    | 3.74E-01 | 7.88E-02  | 1.56E+05 | 1.26E+05 |
| 1.42E+05 | 2.10E+05 | 1.72E+05 | 2.47E+05 | 2.89E+05 | 2.14E+05 | 0.63             | 4.76E-01 | 4.30E-02 | 0.81    | 4.41E-01 | 1.54E-01  | 1.85E+05 | 1.49E+05 |
| 5.60E+04 | 4.58E+04 | 4.42E+04 | 1.03E+05 | 8.24E+04 | 5.42E+04 | 0.63             | 5.35E-01 | 4.84E-02 | 0.81    | 5.22E-01 | 1.96E-01  | 5.20E+04 | 4.21E+04 |
| 8.59E+04 | 4.73E+04 | 3.33E+04 | 1.19E+05 | 9.02E+04 | 5.01E+04 | 0.59             | 6.69E-01 | 1.46E-01 | 0.81    | 8.01E-01 | 4.25E-01  | 6.80E+04 | 5.49E+04 |
| 3.62E+04 | 4.40E+04 | 4.27E+04 | 1.16E+05 | 1.32E+05 | 9.16E+04 | 0.65             | 7.65E-01 | 1.70E-01 | 0.81    | 8.14E-01 | 4.12E-01  | 6.01E+04 | 4.85E+04 |
| 2.15E+05 | 1.94E+05 | 1.92E+05 | 3.31E+05 | 2.39E+05 | 2.24E+05 | 0.64             | 4.66E-01 | 3.88E-02 | 0.81    | 5.14E-01 | 2.13E-01  | 2.03E+05 | 1.64E+05 |
| 1.27E+06 | 1.45E+06 | 1.24E+06 | 2.11E+06 | 1.86E+06 | 1.68E+06 | 0.62             | 4.45E-01 | 3.79E-02 | 0.81    | 4.33E-01 | 1.65E-01  | 1.46E+06 | 1.18E+06 |
| 3.87E+04 | 4.15E+04 | 3.81E+04 | 1.00E+05 | 8.46E+04 | 4.62E+04 | 0.62             | 5.54E-01 | 4.89E-02 | 0.81    | 5.31E-01 | 1.93E-01  | 5.42E+04 | 4.36E+04 |
| 6.23E+05 | 8.58E+05 | 7.00E+05 | 1.45E+06 | 1.46E+06 | 1.18E+06 | 0.63             | 4.70E-01 | 2.42E-02 | 0.81    | 4.27E-01 | 1.15E-01  | 8.58E+05 | 6.91E+05 |
| 1.19E+04 | 4.41E+04 | 4.90E+04 | 3.61E+04 | 1.02E+05 | 8.90E+04 | 0.64             | 7.20E-01 | 1.17E-01 | 0.80    | 8.14E-01 | 3.84E-01  | 5.62E+04 | 4.52E+04 |
| 9.04E+04 | 5.25E+04 | 3.44E+04 | 5.82E+04 | 7.41E+04 | 7.08E+04 | 0.57             | 7.16E-01 | 1.74E-01 | 0.80    | 9.35E-01 | 4.81E-01  | 5.13E+04 | 4.12E+04 |

14 Supplemental Table S2

| Accession # | Protein                                                                  | # of Pep | PEPTIDE                                | Modification                                      | XCorr | Charge | m/z [Da] |
|-------------|--------------------------------------------------------------------------|----------|----------------------------------------|---------------------------------------------------|-------|--------|----------|
| 166064058   | Slit homolog 2 protein                                                   | 2        | LDLNGNNITR                             | Deamidated(4)Deamidated(7)                        | 2.75  | 2      | 566.3    |
| 568938765   | Carbohydrate sulfotransferase 12                                         | 2        | EHVHNTSTHLTFNK                         | Deamidated(5)                                     | 3.75  | 3      | 555.9    |
| 568942782   | Anthrax toxin receptor 1                                                 | 1        | DFNETQLAR                              | Deamidated(3)                                     | 2.47  | 2      | 547.8    |
| 568991301   | Plexin B2                                                                | 10       | SCVAITDAFPQNMSR                        | Carbamidomethyl(2)Deamidated(12)<br>Oxidation(13) | 3.69  | 2      | 857.4    |
| 568998058   | Transmembrane protein 181                                                | 1        | VIETLPANYSLNSSK                        | Deamidated(8)                                     | 3.89  | 2      | 818.9    |
| 569001313   | Equilibrative nucleoside transporter 1                                   | 1        | LDVSNQVSSDTDQSCESTK                    | Carbamidomethyl(15)Deamidated(6)                  | 5.47  | 2      | 1050.9   |
| 294997230   | Histocompatibility 2, class II antigen A, beta 1                         | 1        | HFVYQFMGECYFTNGTQR                     | Carbamidomethyl(10)Deamidated(14)<br>Oxidation(7) | 5.48  | 3      | 768.0    |
| 568972029   | C-type mannose receptor 2                                                | 6        | VTPVCNASLPAQR                          | Carbamidomethyl(5)Deamidated(6)                   | 3.18  | 2      | 707.4    |
| 755522163   | Integrin alpha-M                                                         | 8        | LNVTLVGEPLR                            | Deamidated(2)                                     | 3.1   | 2      | 638.4    |
| 568939628   | Serum paraoxonase/lactonase 3                                            | 1        | VSTLYANNGSVLQGSTVASVYHK                | Deamidated(7)Deamidated(8)                        | 7.19  | 3      | 799.4    |
| 46849812    | Fibronectin                                                              | 10       | LDAPTNLQFVNETDR                        | Deamidated(11)                                    | 4.42  | 2      | 867.4    |
| 568926396   | Tenascin                                                                 | 12       | QTGLAPGQEYEISLHIVKNNTR                 | Deamidated(19)                                    | 5.07  | 4      | 618.1    |
| 254939534   | Peptidyl-prolyl cis-trans isomerase FKBP10                               | 7        | YHYNGTLLDGTAFDNSYSR                    | Deamidated(4)                                     | 6.84  | 3      | 732.3    |
| 170763511   | Platelet-derived growth factor receptor-like protein                     | 1        | EIPANGTDIVYDMK                         | Deamidated(5)Oxidation(13)                        | 3.45  | 2      | 791.9    |
| 31542362    | ADP-ribosyl cyclase 1                                                    | 3        | LVTQTIPCNK                             | Carbamidomethyl(8)Deamidated(9)                   | 2.63  | 2      | 587.8    |
| 34996495    | Dolichyl-diphosphooligosaccharide--protein glycosyltransferase subunit 2 | 1        | SNLDPSNVDSLFFYAAQSSQVLSGC<br>EISVSNETK | Carbamidomethyl(24)Deamidated(30)                 | 5.05  | 3      | 1183.2   |
| 46849812    | Fibronectin                                                              | 10       | ESNPLTAQQTTKLDAPTNLQFVNET<br>DR        | Carbamyl(12)Deamidated(23)                        | 7.45  | 3      | 1011.8   |
| 165905611   | latent transforming growth factor beta binding protein 4                 | 2        | NATSVDSGAPGGAAPGGPGFR                  | Deamidated(1)                                     | 5.14  | 2      | 922.4    |
| 46309573    | Protein sel-1 homolog 1                                                  | 3        | GQTGLGFLYASGLGVNSSQAK                  | Deamidated(16)                                    | 3.61  | 3      | 686.0    |
| 124494256   | Pro-low-density lipoprotein receptor-related protein 1                   | 22       | FNSTEYQVVTR                            | Deamidated(2)                                     | 3.19  | 2      | 672.8    |
| 568990926   | Anoctamin-6                                                              | 2        | NTDKENPYIGLGNITLCR                     | Carbamidomethyl(17)Deamidated(13)                 | 4.66  | 3      | 710.3    |
| 594140550   | Collagen type XII alpha-1                                                | 3        | MLEAYNLTEK                             | Deamidated(6)Oxidation(1)                         | 3.12  | 2      | 614.8    |
| 47523368    | Prolyl 3-hydroxylase 3                                                   | 2        | DALLMEGVTLTQDAQQLNGSER                 | Deamidated(18)Oxidation(5)                        | 6.01  | 3      | 802.7    |
| 20137008    | Biglycan                                                                 | 2        | MIENGSLSFLPTLR                         | Deamidated(4)Oxidation(1)                         | 3.35  | 2      | 797.4    |
| 13384648    | Biotinidase                                                              | 1        | FNDTEVLQR                              | Deamidated(2)                                     | 2.44  | 2      | 561.8    |
| 568960005   | Choline transporter-like protein 2                                       | 3        | KNITDLVEGAK                            | Deamidated(2)                                     | 3.57  | 2      | 594.8    |

14 Supplemental Table S2



| MH+ [Da] | RT [min] | PSM | WT-1     | WT-2     | WT-3     | WT-4     | WT-5     | WT-5-2   | WT-6     | WT-7     | WT-8     | Null-1   | Null-2   |
|----------|----------|-----|----------|----------|----------|----------|----------|----------|----------|----------|----------|----------|----------|
| 1131.6   | 34.0     | 14  | 1.23E+05 | 1.71E+05 | 1.58E+05 | 7.03E+04 | 2.08E+05 | 1.99E+05 | 8.99E+04 | 1.47E+05 | 7.37E+04 | 7.74E+04 | 7.60E+04 |
| 1665.8   | 20.6     | 1   | 1.75E+06 | 1.01E+06 | 3.78E+06 | 0.00E+00 | 4.47E+06 | 4.18E+06 | 1.73E+06 | 2.11E+06 | 5.31E+05 | 5.27E+05 | 9.20E+05 |
| 1094.5   | 31.1     | 4   | 2.65E+05 | 2.81E+05 | 3.85E+05 | 1.76E+05 | 3.49E+05 | 3.81E+05 | 1.68E+05 | 2.81E+05 | 1.07E+05 | 8.15E+04 | 1.97E+05 |
| 1713.8   | 38.5     | 16  | 2.48E+05 | 2.67E+05 | 3.91E+05 | 6.74E+04 | 3.57E+05 | 3.45E+05 | 2.18E+05 | 1.61E+05 | 8.05E+04 | 7.62E+04 | 1.63E+05 |
| 1636.8   | 39.0     | 14  | 1.67E+05 | 1.80E+05 | 2.08E+05 | 1.08E+05 | 2.40E+05 | 2.15E+05 | 8.56E+04 | 1.60E+05 | 7.76E+04 | 5.60E+04 | 1.08E+05 |
| 2100.9   | 27.6     | 12  | 6.50E+04 | 7.68E+04 | 1.02E+05 | 3.81E+04 | 1.86E+05 | 1.55E+05 | 7.46E+04 | 1.05E+05 | 4.28E+04 | 3.32E+04 | 8.83E+04 |
| 2302.0   | 42.4     | 14  | 2.24E+05 | 1.42E+05 | 2.18E+05 | 8.07E+04 | 1.38E+05 | 1.37E+05 | 4.83E+04 | 1.13E+05 | 3.71E+04 | 4.60E+04 | 1.36E+05 |
| 1413.7   | 29.9     | 19  | 1.20E+06 | 1.45E+06 | 1.71E+06 | 5.95E+05 | 1.45E+06 | 1.46E+06 | 1.09E+06 | 8.09E+05 | 4.98E+05 | 2.67E+05 | 9.09E+05 |
| 1275.7   | 45.3     | 30  | 1.53E+06 | 2.29E+06 | 2.43E+06 | 1.09E+06 | 2.33E+06 | 2.31E+06 | 1.36E+06 | 1.46E+06 | 1.36E+06 | 5.47E+05 | 1.12E+06 |
| 2396.2   | 39.6     | 46  | 2.80E+05 | 2.36E+05 | 5.18E+05 | 1.47E+05 | 4.17E+05 | 3.52E+05 | 1.36E+05 | 2.55E+05 | 1.23E+05 | 1.09E+05 | 1.80E+05 |
| 1733.8   | 41.2     | 544 | 5.49E+06 | 7.68E+06 | 8.90E+06 | 5.32E+06 | 1.10E+07 | 9.43E+06 | 3.36E+06 | 5.38E+06 | 2.77E+06 | 3.65E+06 | 4.31E+06 |
| 2469.3   | 38.2     | 10  | 1.17E+05 | 1.44E+05 | 2.97E+05 | 1.48E+05 | 3.63E+05 | 3.79E+05 | 1.63E+04 | 1.93E+05 | 1.03E+05 | 8.07E+04 | 9.82E+04 |
| 2195.0   | 43.3     | 72  | 3.39E+06 | 5.65E+06 | 4.24E+06 | 2.35E+06 | 4.00E+06 | 3.61E+06 | 1.76E+06 | 2.26E+06 | 1.65E+06 | 4.35E+05 | 1.57E+06 |
| 1582.7   | 36.3     | 21  | 2.47E+05 | 3.40E+05 | 3.86E+05 | 1.81E+05 | 3.98E+05 | 4.14E+05 | 1.55E+05 | 1.91E+05 | 1.14E+05 | 1.09E+05 | 1.93E+05 |
| 1174.6   | 27.1     | 10  | 4.72E+05 | 3.28E+05 | 5.70E+05 | 2.39E+03 | 6.85E+05 | 5.68E+05 | 3.57E+05 | 2.94E+05 | 1.91E+05 | 1.21E+05 | 2.89E+05 |
| 3547.6   | 60.7     | 49  | 9.69E+05 | 1.37E+06 | 1.81E+06 | 6.42E+05 | 1.66E+06 | 1.45E+06 | 1.62E+05 | 1.09E+06 | 4.88E+05 | 3.05E+05 | 1.01E+06 |
| 3033.5   | 44.3     | 31  | 2.62E+05 | 3.90E+05 | 3.58E+05 | 3.63E+05 | 5.42E+05 | 3.99E+05 | 7.76E+04 | 3.12E+05 | 1.84E+05 | 1.45E+05 | 1.72E+05 |
| 1843.9   | 32.8     | 20  | 2.85E+06 | 3.60E+06 | 5.59E+06 | 2.97E+06 | 7.44E+06 | 6.87E+06 | 2.35E+06 | 4.47E+06 | 1.71E+06 | 2.09E+06 | 2.97E+06 |
| 2056.0   | 51.5     | 4   | 8.82E+04 | 1.12E+05 | 1.42E+05 | 5.72E+04 | 1.75E+05 | 1.51E+05 | 5.41E+04 | 1.20E+05 | 3.62E+04 | 3.04E+04 | 9.69E+04 |
| 1344.6   | 33.2     | 22  | 1.73E+06 | 1.91E+06 | 2.31E+06 | 1.08E+06 | 2.53E+06 | 2.43E+06 | 1.52E+06 | 1.43E+06 | 1.11E+06 | 6.07E+05 | 1.32E+06 |
| 2129.0   | 41.0     | 12  | 1.69E+05 | 2.01E+05 | 2.99E+05 | 1.18E+05 | 3.18E+05 | 2.96E+05 | 1.40E+05 | 1.86E+05 | 1.01E+05 | 6.41E+04 | 1.52E+05 |
| 1228.6   | 33.2     | 33  | 4.39E+06 | 5.38E+06 | 8.42E+06 | 4.44E+06 | 1.12E+07 | 1.02E+07 | 3.65E+06 | 6.70E+06 | 2.66E+06 | 3.31E+06 | 4.43E+06 |
| 2406.1   | 54.1     | 59  | 1.11E+06 | 1.87E+06 | 2.25E+06 | 9.83E+05 | 2.21E+06 | 2.22E+06 | 5.15E+05 | 1.85E+06 | 7.70E+05 | 3.62E+05 | 1.07E+06 |
| 1593.8   | 51.9     | 246 | 1.97E+07 | 3.21E+07 | 5.51E+07 | 2.74E+07 | 6.30E+07 | 5.73E+07 | 1.72E+07 | 4.03E+07 | 2.28E+07 | 1.51E+07 | 2.72E+07 |
| 1122.5   | 31.2     | 1   | 3.99E+05 | 6.46E+05 | 8.71E+05 | 3.79E+05 | 7.46E+05 | 6.73E+05 | 2.98E+05 | 4.74E+05 | 1.90E+05 | 2.01E+05 | 3.12E+05 |
| 1188.6   | 32.1     | 11  | 1.10E+06 | 1.62E+06 | 1.92E+06 | 6.61E+05 | 2.10E+06 | 1.76E+06 | 1.20E+06 | 1.35E+06 | 7.17E+05 | 5.13E+05 | 1.03E+06 |

14 Supplemental Table S2

| Null-3   | Null-4   | Null-5   | Null-6   | Null-7   | Null-8   | Ratio<br>Null/WT | SD       | p value  | N Ratio | N SD     | N p value | Avg_WT   | Avg_Null |
|----------|----------|----------|----------|----------|----------|------------------|----------|----------|---------|----------|-----------|----------|----------|
| 6.29E+04 | 6.15E+04 | 9.31E+04 | 8.96E+04 | 1.18E+05 | 1.07E+05 | 0.62             | 3.80E-01 | 1.83E-02 | 0.80    | 3.85E-01 | 1.20E-01  | 7.95E+04 | 6.38E+04 |
| 9.16E+05 | 1.48E+06 | 9.29E+05 | 1.54E+06 | 1.65E+06 | 2.55E+06 | 0.61             | 7.43E-01 | 1.71E-01 | 0.80    | 8.01E-01 | 4.17E-01  | 1.18E+06 | 9.52E+05 |
| 9.33E+04 | 1.70E+05 | 1.16E+05 | 1.73E+05 | 2.35E+05 | 2.79E+05 | 0.63             | 4.94E-01 | 3.11E-02 | 0.80    | 4.80E-01 | 1.55E-01  | 1.51E+05 | 1.22E+05 |
| 9.01E+04 | 1.63E+05 | 1.12E+05 | 1.75E+05 | 1.80E+05 | 1.98E+05 | 0.61             | 4.94E-01 | 5.23E-02 | 0.80    | 4.78E-01 | 1.91E-01  | 1.32E+05 | 1.06E+05 |
| 6.28E+04 | 1.05E+05 | 8.19E+04 | 1.30E+05 | 1.37E+05 | 1.18E+05 | 0.62             | 4.15E-01 | 1.84E-02 | 0.80    | 3.77E-01 | 9.16E-02  | 9.15E+04 | 7.32E+04 |
| 3.38E+04 | 6.04E+04 | 5.21E+04 | 5.02E+04 | 7.61E+04 | 6.58E+04 | 0.61             | 5.29E-01 | 6.74E-02 | 0.80    | 5.39E-01 | 2.23E-01  | 5.30E+04 | 4.24E+04 |
| 2.97E+04 | 9.29E+04 | 4.97E+04 | 7.28E+04 | 8.00E+04 | 1.20E+05 | 0.62             | 6.16E-01 | 8.35E-02 | 0.80    | 7.13E-01 | 3.28E-01  | 7.16E+04 | 5.73E+04 |
| 4.18E+05 | 6.31E+05 | 6.56E+05 | 8.61E+05 | 8.37E+05 | 1.12E+06 | 0.62             | 4.76E-01 | 2.65E-02 | 0.80    | 4.59E-01 | 1.31E-01  | 6.47E+05 | 5.17E+05 |
| 1.12E+06 | 1.02E+06 | 8.41E+05 | 1.61E+06 | 1.50E+06 | 1.36E+06 | 0.64             | 3.83E-01 | 8.92E-03 | 0.80    | 3.93E-01 | 9.10E-02  | 1.05E+06 | 8.38E+05 |
| 1.15E+05 | 1.52E+05 | 1.42E+05 | 2.41E+05 | 2.32E+05 | 1.69E+05 | 0.61             | 4.81E-01 | 5.18E-02 | 0.80    | 4.50E-01 | 1.79E-01  | 1.55E+05 | 1.23E+05 |
| 5.12E+06 | 4.12E+06 | 2.57E+06 | 3.12E+06 | 3.30E+06 | 4.61E+06 | 0.58             | 3.77E-01 | 2.00E-02 | 0.80    | 4.82E-01 | 1.47E-01  | 3.70E+06 | 2.95E+06 |
| 1.16E+05 | 1.16E+05 | 3.48E+04 | 1.64E+05 | 2.49E+05 | 1.00E+05 | 0.61             | 7.15E-01 | 1.34E-01 | 0.80    | 7.54E-01 | 3.52E-01  | 1.10E+05 | 8.76E+04 |
| 1.19E+06 | 2.35E+06 | 1.73E+06 | 3.18E+06 | 3.08E+06 | 2.89E+06 | 0.64             | 5.70E-01 | 5.75E-02 | 0.80    | 6.27E-01 | 2.56E-01  | 1.85E+06 | 1.47E+06 |
| 8.68E+04 | 1.98E+05 | 1.03E+05 | 1.79E+05 | 1.93E+05 | 2.55E+05 | 0.61             | 4.79E-01 | 3.37E-02 | 0.80    | 4.69E-01 | 1.43E-01  | 1.52E+05 | 1.21E+05 |
| 1.74E+05 | 2.06E+05 | 2.15E+05 | 2.96E+05 | 2.83E+05 | 2.99E+05 | 0.61             | 5.10E-01 | 7.34E-02 | 0.80    | 4.72E-01 | 2.03E-01  | 2.17E+05 | 1.73E+05 |
| 4.99E+05 | 6.42E+05 | 4.90E+05 | 7.42E+05 | 8.12E+05 | 8.12E+05 | 0.62             | 5.32E-01 | 6.92E-02 | 0.80    | 5.62E-01 | 2.46E-01  | 6.12E+05 | 4.86E+05 |
| 2.89E+05 | 2.39E+05 | 1.18E+05 | 2.30E+05 | 2.01E+05 | 1.29E+05 | 0.59             | 4.36E-01 | 2.29E-02 | 0.80    | 5.79E-01 | 2.12E-01  | 1.84E+05 | 1.46E+05 |
| 1.64E+06 | 3.17E+06 | 1.48E+06 | 2.21E+06 | 3.39E+06 | 3.30E+06 | 0.60             | 4.73E-01 | 4.34E-02 | 0.79    | 4.88E-01 | 1.73E-01  | 2.36E+06 | 1.88E+06 |
| 5.66E+04 | 6.12E+04 | 4.67E+04 | 7.83E+04 | 7.02E+04 | 6.51E+04 | 0.61             | 4.74E-01 | 4.03E-02 | 0.79    | 5.18E-01 | 1.96E-01  | 5.88E+04 | 4.67E+04 |
| 8.47E+05 | 1.19E+06 | 7.82E+05 | 1.49E+06 | 1.25E+06 | 1.37E+06 | 0.62             | 3.70E-01 | 7.62E-03 | 0.79    | 3.22E-01 | 3.73E-02  | 1.03E+06 | 8.15E+05 |
| 8.60E+04 | 1.34E+05 | 9.94E+04 | 1.42E+05 | 1.70E+05 | 1.50E+05 | 0.61             | 4.31E-01 | 2.49E-02 | 0.79    | 3.86E-01 | 9.02E-02  | 1.15E+05 | 9.15E+04 |
| 2.45E+06 | 4.84E+06 | 2.13E+06 | 3.23E+06 | 5.17E+06 | 4.92E+06 | 0.60             | 4.71E-01 | 4.04E-02 | 0.79    | 4.92E-01 | 1.67E-01  | 3.57E+06 | 2.83E+06 |
| 6.19E+05 | 1.13E+06 | 6.86E+05 | 1.40E+06 | 1.31E+06 | 1.14E+06 | 0.63             | 5.21E-01 | 5.11E-02 | 0.79    | 5.58E-01 | 2.19E-01  | 8.84E+05 | 7.01E+05 |
| 1.48E+07 | 2.16E+07 | 1.60E+07 | 3.34E+07 | 3.00E+07 | 2.64E+07 | 0.62             | 4.85E-01 | 4.80E-02 | 0.79    | 4.59E-01 | 1.66E-01  | 2.13E+07 | 1.69E+07 |
| 3.38E+05 | 3.91E+05 | 1.92E+05 | 3.52E+05 | 3.36E+05 | 3.53E+05 | 0.60             | 4.00E-01 | 2.51E-02 | 0.79    | 4.67E-01 | 1.51E-01  | 2.93E+05 | 2.32E+05 |
| 6.59E+05 | 8.50E+05 | 5.91E+05 | 1.13E+06 | 1.13E+06 | 9.13E+05 | 0.62             | 4.02E-01 | 1.67E-02 | 0.79    | 3.70E-01 | 8.18E-02  | 7.92E+05 | 6.27E+05 |

14 Supplemental Table S2

| Accession # | Protein                                                            | # of Pep | PEPTIDE                               | Modification                                       | XCorr | Charge | m/z [Da] |
|-------------|--------------------------------------------------------------------|----------|---------------------------------------|----------------------------------------------------|-------|--------|----------|
| 224967112   | coagulation factor XIII B chain                                    | 2        | EQETCLAPELEHGNYSTTQR                  | Carbamidomethyl(5)Deamidated(14)                   | 4.27  | 3      | 788.7    |
| 153791389   | integrin alpha-1                                                   | 13       | ENMTFGSTLVNPK                         | Deamidated(2)Oxidation(3)                          | 3.72  | 2      | 778.4    |
| 170172560   | Heparan sulfate 2-O-sulfotransferase 1                             | 1        | YHVLHINTTK                            | Deamidated(7)                                      | 2.59  | 2      | 613.8    |
| 153791270   | Laminin subunit gamma-1                                            | 12       | CDQCEENYFYNR                          | Carbamidomethyl(1)Carbamidomethyl(4)Deamidated(11) | 4.36  | 2      | 849.8    |
| 133778978   | Cation-independent mannose-6-phosphate receptor                    | 12       | MSVINFECK                             | Carbamidomethyl(8)Deamidated(9)Oxidation(1)        | 3.24  | 2      | 629.8    |
| 568958751   | Hypoxia up-regulated protein                                       | 7        | LSALDNLLNHSSIFLK                      | Deamidated(9)                                      | 7.1   | 3      | 596.0    |
| 568954529   | Protocadherin Fat 1                                                | 6        | TGTIAIQNTQLR                          | Deamidated(8)                                      | 3.58  | 2      | 709.4    |
| 755532856   | Laminin, alpha 2                                                   | 17       | VFQAESHAQQLNDSSAVLDGILDEAKNISFNATAAFR | Deamidated(12)Deamidated(27)Deamidated(31)         | 8.49  | 4      | 981.7    |
| 568971835   | Integrin beta-3                                                    | 1        | DLPEELSLSFNATCLNNEVIPGLK              | Carbamidomethyl(14)Deamidated(11)                  | 3.6   | 3      | 892.1    |
| 568990926   | Anoctamin-6                                                        | 2        | LNITCESSK                             | Carbamidomethyl(5)Deamidated(2)                    | 2.52  | 2      | 526.8    |
| 6755863     | Endoplasmic reticulum chaperone protein                            | 3        | GVVDSDDLPLNVSR                        | Deamidated(11)                                     | 3.46  | 2      | 743.9    |
| 594140550   | Collagen type XII alpha-1                                          | 3        | NLQVYNATSNSTLVK                       | Deamidated(6)                                      | 4.68  | 2      | 826.9    |
| 755503302   | Chloride channel calcium activated 1                               | 1        | MSQHPLDLQEDFNATLVNASSLIPK             | Deamidated(14)Deamidated(19)Oxidation(1)           | 5.75  | 3      | 967.5    |
| 6680878     | Lysosome membrane protein 2                                        | 7        | NMVLQNGTK                             | Deamidated(1)Deamidated(6)Oxidation(2)             | 2.72  | 2      | 511.3    |
| 33859596    | Prolyl 4-hydroxylase subunit alpha-1                               | 1        | DMSDGFISNLTQIR                        | Deamidated(9)Oxidation(2)                          | 4.27  | 2      | 807.4    |
| 755551258   | CMP-N-acetylneuraminase-beta-galactosidase-2,3-sialyltransferase 1 | 1        | TGVHDGDFEYNITTTLAANK                  | Deamidated(11)                                     | 5.54  | 3      | 761.0    |
| 568972124   | Prolyl 4-hydroxylase subunit alpha-2                               | 1        | SLSNQTDAGLATQENLYERPTDYLPER           | Deamidated(4)                                      | 5.32  | 3      | 1028.2   |
| 568909251   | GPI ethanolamine phosphate transferase 1                           | 1        | ENPVEFDSLFINESK                       | Deamidated(11)                                     | 3.75  | 2      | 828.4    |
| 6754148     | H-2 class I histocompatibility antigen, D-37 alpha chain           | 1        | LGNETLQR                              | Deamidated(3)                                      | 2.47  | 2      | 466.2    |
| 46309573    | Protein sel-1 homolog 1                                            | 3        | EATIVGENETYPR                         | Deamidated(8)                                      | 2.67  | 2      | 740.4    |
| 755470160   | Complement C4-B                                                    | 2        | NTTCQDLQIEVK                          | Carbamidomethyl(4)Deamidated(1)                    | 3.33  | 2      | 725.3    |
| 568984304   | Lipid phosphate phosphohydrolase 1                                 | 1        | INCSDGYIEDYICQGNEEK                   | Carbamidomethyl(3)Carbamidomethyl(13)Deamidated(2) | 4.23  | 2      | 1154.5   |
| 568987063   | stabilin-1                                                         | 7        | AYTIFVPTNHSLETQGNNSVLGIDTVR           | Deamidated(17)Deamidated(18)                       | 6.48  | 3      | 983.5    |
| 224994201   | Inactive serine protease PAMR1                                     | 1        | SPGFKNDTLHYGMVR                       | Deamidated(6)Oxidation(13)                         | 3.31  | 3      | 580.3    |

14 Supplemental Table S2

| MH+ [Da] | RT [min] | PSM | WT-1     | WT-2     | WT-3     | WT-4     | WT-5     | WT-5-2   | WT-6     | WT-7     | WT-8     | Null-1   | Null-2   |
|----------|----------|-----|----------|----------|----------|----------|----------|----------|----------|----------|----------|----------|----------|
| 2364.0   | 32.7     | 9   | 5.69E+04 | 1.22E+05 | 1.55E+05 | 7.15E+04 | 2.34E+05 | 1.70E+05 | 8.31E+04 | 7.12E+04 | 4.90E+04 | 4.53E+04 | 9.98E+04 |
| 1555.7   | 35.9     | 18  | 1.97E+05 | 3.02E+05 | 3.43E+05 | 1.26E+05 | 4.16E+05 | 4.03E+05 | 2.26E+05 | 2.71E+05 | 1.24E+05 | 9.09E+04 | 1.95E+05 |
| 1226.7   | 24.9     | 15  | 8.42E+05 | 6.74E+05 | 8.83E+05 | 0.00E+00 | 9.58E+05 | 7.72E+05 | 5.04E+05 | 6.34E+05 | 2.62E+05 | 2.18E+05 | 3.90E+05 |
| 1698.6   | 32.9     | 18  | 2.74E+05 | 1.90E+05 | 4.78E+05 | 1.15E+05 | 5.78E+05 | 6.17E+05 | 2.86E+05 | 1.66E+05 | 1.41E+05 | 1.39E+05 | 2.10E+05 |
| 1258.5   | 33.7     | 13  | 1.18E+05 | 1.59E+05 | 1.97E+05 | 3.83E+04 | 2.08E+05 | 2.30E+05 | 9.05E+04 | 8.82E+04 | 5.84E+04 | 4.25E+04 | 7.97E+04 |
| 1786.0   | 57.9     | 28  | 1.07E+06 | 2.53E+06 | 2.08E+06 | 1.39E+06 | 2.54E+06 | 2.24E+06 | 5.96E+05 | 1.91E+06 | 1.09E+06 | 3.42E+05 | 1.44E+06 |
| 1417.8   | 34.6     | 17  | 2.03E+05 | 2.92E+05 | 3.25E+05 | 1.27E+05 | 3.65E+05 | 3.39E+05 | 1.35E+05 | 2.36E+05 | 9.37E+04 | 6.94E+04 | 1.69E+05 |
| 3923.9   | 70.6     | 46  | 2.38E+05 | 4.72E+05 | 1.53E+06 | 2.02E+05 | 9.25E+05 | 4.85E+05 | 9.83E+03 | 4.58E+05 | 4.93E+04 | 2.17E+04 | 1.05E+05 |
| 2674.3   | 68.9     | 11  | 6.84E+04 | 2.13E+05 | 2.63E+05 | 7.91E+04 | 2.27E+05 | 1.85E+05 | 2.64E+04 | 1.33E+05 | 6.88E+04 | 2.59E+04 | 1.16E+05 |
| 1052.5   | 24.7     | 4   | 1.15E+05 | 1.36E+05 | 1.56E+05 | 5.02E+03 | 1.96E+05 | 2.09E+05 | 1.27E+05 | 1.03E+05 | 4.70E+04 | 3.65E+04 | 9.19E+04 |
| 1486.7   | 42.9     | 3   | 9.22E+04 | 1.30E+05 | 1.37E+05 | 6.48E+04 | 1.48E+05 | 1.55E+05 | 7.86E+04 | 8.46E+04 | 5.48E+04 | 2.19E+04 | 6.24E+04 |
| 1652.8   | 38.0     | 122 | 1.71E+06 | 2.08E+06 | 2.85E+06 | 2.04E+06 | 4.05E+06 | 3.59E+06 | 6.48E+05 | 2.69E+06 | 1.06E+06 | 1.21E+06 | 1.91E+06 |
| 2900.4   | 56.9     | 7   | 4.15E+04 | 8.60E+04 | 1.27E+05 | 2.71E+04 | 1.64E+05 | 1.24E+05 | 3.48E+04 | 9.63E+04 | 5.37E+04 | 6.53E+03 | 6.07E+04 |
| 1021.5   | 19.8     | 26  | 3.37E+05 | 2.52E+05 | 3.67E+05 | 0.00E+00 | 4.95E+05 | 6.30E+05 | 2.90E+05 | 3.30E+05 | 1.08E+05 | 9.08E+04 | 2.03E+05 |
| 1613.7   | 50.9     | 79  | 2.46E+06 | 4.31E+06 | 5.43E+06 | 2.75E+06 | 6.49E+06 | 5.55E+06 | 2.46E+06 | 3.31E+06 | 2.25E+06 | 8.88E+05 | 2.78E+06 |
| 2281.1   | 54.3     | 15  | 1.15E+05 | 1.86E+05 | 1.83E+05 | 1.08E+05 | 1.91E+05 | 2.35E+05 | 4.94E+04 | 1.76E+05 | 7.40E+04 | 4.93E+04 | 1.71E+05 |
| 3082.5   | 44.2     | 16  | 7.54E+05 | 1.31E+06 | 1.22E+06 | 1.03E+06 | 1.17E+06 | 1.17E+06 | 4.55E+05 | 9.00E+05 | 8.26E+05 | 2.93E+05 | 5.38E+05 |
| 1655.7   | 51.2     | 9   | 1.90E+05 | 1.60E+05 | 2.21E+05 | 1.08E+05 | 2.90E+05 | 2.34E+05 | 1.08E+05 | 1.67E+05 | 7.58E+04 | 6.81E+04 | 1.09E+05 |
| 931.5    | 21.4     | 3   | 1.47E+05 | 9.98E+04 | 1.34E+05 | 3.37E+05 | 2.18E+05 | 1.94E+05 | 3.63E+04 | 1.41E+05 | 3.93E+04 | 4.62E+04 | 9.89E+04 |
| 1479.7   | 31.2     | 7   | 1.56E+06 | 2.93E+06 | 2.95E+06 | 3.36E+06 | 2.85E+06 | 2.56E+06 | 1.55E+06 | 2.11E+06 | 1.22E+06 | 1.02E+06 | 1.51E+06 |
| 1449.7   | 34.8     | 3   | 3.02E+05 | 2.61E+05 | 4.63E+05 | 9.25E+05 | 4.03E+05 | 4.47E+05 | 1.86E+05 | 2.16E+05 | 1.18E+05 | 1.58E+05 | 2.09E+05 |
| 2307.9   | 44.1     | 3   | 2.73E+04 | 3.08E+04 | 7.29E+04 | 9.32E+03 | 7.50E+04 | 8.47E+04 | 6.12E+04 | 2.72E+04 | 2.20E+04 | 8.07E+03 | 3.28E+04 |
| 2948.5   | 51.8     | 16  | 2.22E+05 | 3.13E+05 | 4.52E+05 | 2.34E+05 | 6.31E+05 | 6.55E+05 | 1.29E+05 | 4.70E+05 | 1.73E+05 | 1.45E+05 | 2.34E+05 |
| 1738.8   | 26.6     | 3   | 7.18E+04 | 7.60E+04 | 9.85E+04 | 8.81E+04 | 1.35E+05 | 1.40E+05 | 7.29E+04 | 7.13E+04 | 4.11E+04 | 2.75E+04 | 5.25E+04 |

14 Supplemental Table S2

| Null-3   | Null-4   | Null-5   | Null-6   | Null-7   | Null-8   | Ratio<br>Null/WT | SD       | p value  | N Ratio | N SD     | N p value | Avg_WT   | Avg_Null |
|----------|----------|----------|----------|----------|----------|------------------|----------|----------|---------|----------|-----------|----------|----------|
| 5.18E+04 | 6.32E+04 | 5.33E+04 | 6.12E+04 | 7.75E+04 | 7.79E+04 | 0.59             | 4.86E-01 | 6.11E-02 | 0.79    | 4.72E-01 | 1.77E-01  | 6.21E+04 | 4.92E+04 |
| 1.10E+05 | 1.75E+05 | 1.56E+05 | 1.72E+05 | 2.25E+05 | 1.85E+05 | 0.61             | 4.14E-01 | 2.37E-02 | 0.79    | 3.92E-01 | 1.05E-01  | 1.52E+05 | 1.21E+05 |
| 2.90E+05 | 3.95E+05 | 3.36E+05 | 4.78E+05 | 4.65E+05 | 4.38E+05 | 0.61             | 4.59E-01 | 5.58E-02 | 0.79    | 4.50E-01 | 1.99E-01  | 3.52E+05 | 2.78E+05 |
| 1.34E+05 | 1.92E+05 | 1.39E+05 | 2.87E+05 | 2.00E+05 | 1.72E+05 | 0.58             | 5.17E-01 | 7.83E-02 | 0.79    | 5.22E-01 | 2.27E-01  | 1.73E+05 | 1.37E+05 |
| 5.41E+04 | 8.69E+04 | 5.48E+04 | 1.19E+05 | 1.29E+05 | 7.44E+04 | 0.61             | 5.53E-01 | 6.65E-02 | 0.79    | 5.42E-01 | 2.05E-01  | 7.40E+04 | 5.85E+04 |
| 6.73E+05 | 1.04E+06 | 8.34E+05 | 1.53E+06 | 1.33E+06 | 1.57E+06 | 0.64             | 5.24E-01 | 4.65E-02 | 0.79    | 5.61E-01 | 2.07E-01  | 1.00E+06 | 7.91E+05 |
| 1.14E+05 | 1.42E+05 | 1.11E+05 | 1.96E+05 | 1.49E+05 | 1.98E+05 | 0.61             | 4.51E-01 | 3.08E-02 | 0.79    | 4.46E-01 | 1.38E-01  | 1.33E+05 | 1.05E+05 |
| 9.03E+04 | 7.57E+04 | 4.16E+05 | 7.32E+05 | 5.62E+05 | 3.87E+05 | 0.62             | 1.15E+00 | 3.32E-01 | 0.79    | 1.38E+00 | 5.91E-01  | 2.63E+05 | 2.08E+05 |
| 9.08E+04 | 5.80E+04 | 6.09E+04 | 1.14E+05 | 1.06E+05 | 1.24E+05 | 0.62             | 6.21E-01 | 1.10E-01 | 0.79    | 6.84E-01 | 3.14E-01  | 8.03E+04 | 6.33E+04 |
| 4.84E+04 | 7.46E+04 | 6.02E+04 | 8.46E+04 | 8.36E+04 | 1.09E+05 | 0.61             | 5.22E-01 | 6.62E-02 | 0.79    | 5.08E-01 | 1.99E-01  | 6.84E+04 | 5.39E+04 |
| 3.94E+04 | 5.47E+04 | 6.96E+04 | 1.01E+05 | 8.30E+04 | 8.78E+04 | 0.62             | 4.73E-01 | 2.26E-02 | 0.79    | 4.53E-01 | 1.05E-01  | 5.99E+04 | 4.71E+04 |
| 1.05E+06 | 1.57E+06 | 6.70E+05 | 1.15E+06 | 1.73E+06 | 1.74E+06 | 0.60             | 4.75E-01 | 4.26E-02 | 0.79    | 5.20E-01 | 1.84E-01  | 1.31E+06 | 1.03E+06 |
| 2.95E+04 | 2.71E+04 | 5.65E+04 | 1.04E+05 | 6.35E+04 | 7.88E+04 | 0.64             | 7.37E-01 | 1.39E-01 | 0.78    | 7.83E-01 | 3.33E-01  | 4.83E+04 | 3.79E+04 |
| 1.21E+05 | 1.78E+05 | 1.68E+05 | 3.16E+05 | 2.10E+05 | 2.15E+05 | 0.60             | 5.80E-01 | 9.29E-02 | 0.78    | 6.00E-01 | 2.62E-01  | 1.75E+05 | 1.37E+05 |
| 1.66E+06 | 2.23E+06 | 2.10E+06 | 3.11E+06 | 2.96E+06 | 3.33E+06 | 0.61             | 4.64E-01 | 2.86E-02 | 0.78    | 4.25E-01 | 9.42E-02  | 2.21E+06 | 1.73E+06 |
| 7.63E+04 | 5.82E+04 | 6.35E+04 | 8.57E+04 | 1.23E+05 | 9.47E+04 | 0.62             | 5.36E-01 | 4.23E-02 | 0.78    | 6.09E-01 | 2.19E-01  | 8.48E+04 | 6.63E+04 |
| 4.55E+05 | 6.02E+05 | 5.34E+05 | 6.85E+05 | 9.91E+05 | 8.91E+05 | 0.64             | 4.09E-01 | 1.02E-02 | 0.78    | 4.32E-01 | 1.03E-01  | 5.81E+05 | 4.54E+05 |
| 1.05E+05 | 7.57E+04 | 9.21E+04 | 1.26E+05 | 1.43E+05 | 1.00E+05 | 0.59             | 3.80E-01 | 1.67E-02 | 0.78    | 3.54E-01 | 6.33E-02  | 9.77E+04 | 7.62E+04 |
| 5.99E+04 | 8.43E+04 | 8.96E+04 | 1.19E+05 | 9.39E+04 | 1.03E+05 | 0.58             | 5.19E-01 | 8.27E-02 | 0.78    | 5.48E-01 | 2.54E-01  | 8.22E+04 | 6.41E+04 |
| 1.93E+06 | 1.34E+06 | 8.97E+05 | 1.62E+06 | 1.37E+06 | 1.32E+06 | 0.59             | 3.29E-01 | 5.08E-03 | 0.78    | 4.27E-01 | 7.92E-02  | 1.34E+06 | 1.04E+06 |
| 3.73E+05 | 1.58E+05 | 1.55E+05 | 2.81E+05 | 1.27E+05 | 1.60E+05 | 0.55             | 5.84E-01 | 7.91E-02 | 0.78    | 8.03E-01 | 3.38E-01  | 2.02E+05 | 1.57E+05 |
| 1.03E+04 | 3.56E+04 | 1.79E+04 | 2.23E+04 | 4.90E+04 | 4.40E+04 | 0.60             | 7.01E-01 | 1.15E-01 | 0.78    | 7.32E-01 | 2.92E-01  | 2.53E+04 | 1.96E+04 |
| 2.20E+05 | 1.36E+05 | 1.79E+05 | 3.17E+05 | 2.89E+05 | 2.22E+05 | 0.60             | 4.97E-01 | 6.01E-02 | 0.78    | 5.29E-01 | 2.10E-01  | 2.08E+05 | 1.61E+05 |
| 4.70E+04 | 4.24E+04 | 5.56E+04 | 6.76E+04 | 6.08E+04 | 6.11E+04 | 0.59             | 3.56E-01 | 9.28E-03 | 0.78    | 2.87E-01 | 1.61E-02  | 4.95E+04 | 3.84E+04 |

14 Supplemental Table S2

| Accession # | Protein                                                    | # of Pep | PEPTIDE                         | Modification                                               | XCorr | Charge | m/z [Da] |
|-------------|------------------------------------------------------------|----------|---------------------------------|------------------------------------------------------------|-------|--------|----------|
| 6671712     | Leukocyte surface antigen CD53                             | 1        | LNTLVAEGLNDSIQHYHSDNSTMK        | Deamidated(2)Deamidated(20)Oxidation(23)                   | 4.39  | 4      | 676.8    |
| 529250188   | Angiotensin-converting                                     | 3        | STEVSNHTLK                      | Deamidated(6)                                              | 3.03  | 2      | 558.8    |
| 158711710   | Chondroitin sulfate glucuronyltransferase                  | 1        | ATLSTLAVAVNR                    | Deamidated(11)                                             | 2.62  | 2      | 608.8    |
| 31981983    | Stromal interaction molecule                               | 1        | LAVTNTTMTGTVLK                  | Deamidated(5)Oxidation(8)                                  | 3.73  | 2      | 733.9    |
| 164565411   | Collagen alpha-1(V)                                        | 3        | VYCNFTAGGSTCVFPDKK              | Carbamidomethyl(3)Carbamidomethyl(12)Deamidated(4)         | 2.96  | 2      | 1026.5   |
| 568933707   | ADP-ribosyl cyclase 2                                      | 1        | DSSGVINVMLNGSEPK                | Deamidated(11)Oxidation(9)                                 | 4.13  | 2      | 832.4    |
| 568915220   | CD44 antigen                                               | 1        | TEAADLCQAFNSTLPTMDQMK           | Carbamidomethyl(7)Deamidated(11)Oxidation(17)Oxidation(20) | 5.23  | 3      | 802.3    |
| 165932373   | Collectin-12                                               | 4        | ETLQNNFLITTVNK                  | Deamidated(5)Deamidated(14)                                | 3.26  | 2      | 862.9    |
| 6753332     | Monocyte differentiation antigen CD14                      | 3        | VLSIAQAHSLNFSCEQVR              | Carbamidomethyl(14)Deamidated(11)                          | 4.47  | 3      | 687.3    |
| 568941620   | Glucoside xylosyltransferase                               | 2        | QFNSTQLAAMAPEHEIPK              | Deamidated(3)Oxidation(10)                                 | 4.6   | 3      | 677.0    |
| 568962759   | Dystroglycan                                               | 1        | LAFAFGDRNCSSITLQNITR            | Carbamidomethyl(10)Deamidated(9)Deamidated(17)             | 4.28  | 3      | 762.7    |
| 568995622   | Target of Nesh-SH3                                         | 2        | VHINTTSDSILLK                   | Deamidated(4)                                              | 2.64  | 2      | 721.4    |
| 529250188   | Angiotensin-converting                                     | 3        | QQYNSLLSNMSR                    | Deamidated(9)Oxidation(10)                                 | 3.32  | 2      | 729.3    |
| 6681143     | Decorin                                                    | 3        | LGLSFNSITVMENGLANVPHLR          | Deamidated(13)Deamidated(18)Oxidation(11)                  | 3.72  | 3      | 829.1    |
| 568991244   | Collagen alpha-1(XIV) chain                                | 4        | AINASANITSDGVEVLGR              | Deamidated(3)Deamidated(7)                                 | 4.26  | 2      | 894.5    |
| 755496541   | Complement component receptor 1-like protein               | 1        | INYTCNQGYR                      | Carbamidomethyl(5)Deamidated(2)                            | 2.88  | 2      | 645.3    |
| 568958972   | Neural cell adhesion molecule 1                            | 2        | DGQLLPSSNYSNIK                  | Deamidated(9)                                              | 3.62  | 2      | 768.9    |
| 568915917   | Tyrosine-protein phosphatase non-receptor type substrate 1 | 5        | NTDGTYNYTSLFLVNSSAHR            | Deamidated(15)                                             | 6.28  | 3      | 754.4    |
| 569006247   | Atlastin-3                                                 | 1        | ELGGAIDSGAAYVLEQASSHIGNSTQA AVR | Deamidated(23)                                             | 7.64  | 3      | 991.8    |
| 568915307   | Dipeptidyl peptidase 4                                     | 1        | KLDFIVLNETR                     | Deamidated(8)                                              | 2.81  | 2      | 674.9    |
| 6680878     | Lysosome membrane protein                                  | 7        | NGTNDGEYVFLTGEDNYLNFSK          | Deamidated(1)Deamidated(19)                                | 5.79  | 3      | 833.7    |

| MH+ [Da] | RT [min] | PSM | WT-1     | WT-2     | WT-3     | WT-4     | WT-5     | WT-5-2   | WT-6     | WT-7     | WT-8     | Null-1   | Null-2   |
|----------|----------|-----|----------|----------|----------|----------|----------|----------|----------|----------|----------|----------|----------|
| 2704.3   | 36.7     | 8   | 1.85E+05 | 1.40E+05 | 7.14E+05 | 9.16E+04 | 1.02E+06 | 8.58E+05 | 1.05E+05 | 4.05E+05 | 1.62E+05 | 1.06E+05 | 3.67E+05 |
| 1116.6   | 17.3     | 5   | 2.36E+05 | 1.37E+05 | 3.32E+05 | 6.94E+02 | 3.71E+05 | 1.12E+02 | 3.08E+05 | 1.76E+05 | 9.23E+04 | 5.35E+04 | 1.26E+05 |
| 1216.7   | 40.2     | 1   | 1.05E+05 | 1.38E+05 | 1.82E+05 | 5.99E+04 | 1.54E+05 | 1.37E+05 | 6.16E+04 | 1.14E+05 | 4.36E+04 | 3.49E+04 | 6.72E+04 |
| 1466.8   | 34.1     | 18  | 1.17E+06 | 1.03E+06 | 1.35E+06 | 5.55E+05 | 1.82E+06 | 1.64E+06 | 7.42E+05 | 1.19E+06 | 5.08E+05 | 4.34E+05 | 7.76E+05 |
| 2051.9   | 35.8     | 10  | 1.77E+05 | 1.36E+05 | 2.41E+05 | 6.98E+04 | 5.08E+05 | 4.15E+05 | 1.18E+05 | 1.44E+05 | 4.70E+04 | 8.09E+04 | 1.50E+05 |
| 1663.8   | 39.8     | 17  | 4.12E+05 | 4.51E+05 | 4.45E+05 | 2.69E+05 | 4.18E+05 | 4.16E+05 | 2.31E+05 | 3.23E+05 | 2.04E+05 | 1.13E+05 | 2.55E+05 |
| 2405.0   | 46.2     | 36  | 7.79E+05 | 1.01E+06 | 1.07E+06 | 5.69E+05 | 1.14E+06 | 1.00E+06 | 6.45E+05 | 6.00E+05 | 4.58E+05 | 1.87E+05 | 5.93E+05 |
| 1724.9   | 47.3     | 8   | 2.53E+05 | 2.91E+05 | 3.24E+05 | 1.12E+05 | 4.34E+05 | 4.38E+05 | 2.07E+05 | 3.27E+05 | 1.30E+05 | 8.11E+04 | 2.08E+05 |
| 2060.0   | 39.9     | 11  | 2.02E+05 | 2.49E+05 | 3.59E+05 | 1.41E+05 | 2.67E+05 | 2.41E+05 | 1.16E+05 | 1.65E+05 | 1.46E+05 | 6.60E+04 | 1.41E+05 |
| 2029.0   | 34.4     | 18  | 3.98E+05 | 3.22E+05 | 4.84E+05 | 2.77E+05 | 5.47E+05 | 4.67E+05 | 2.22E+05 | 3.41E+05 | 1.56E+05 | 1.18E+05 | 2.51E+05 |
| 2286.1   | 50.1     | 11  | 1.67E+05 | 1.49E+05 | 3.94E+05 | 4.42E+04 | 5.16E+05 | 4.90E+05 | 2.54E+04 | 1.98E+05 | 5.27E+04 | 1.04E+04 | 3.07E+05 |
| 1441.8   | 36.7     | 16  | 1.30E+05 | 1.08E+05 | 2.48E+05 | 1.46E+05 | 3.53E+05 | 2.88E+05 | 9.20E+04 | 1.85E+05 | 6.89E+04 | 8.59E+04 | 1.79E+05 |
| 1457.7   | 31.3     | 14  | 1.99E+05 | 1.24E+05 | 2.07E+05 | 1.13E+05 | 2.76E+05 | 2.68E+05 | 1.65E+05 | 1.22E+05 | 1.25E+05 | 5.35E+04 | 1.29E+05 |
| 2485.3   | 50.7     | 191 | 1.80E+06 | 1.97E+06 | 6.63E+06 | 2.06E+06 | 4.76E+06 | 4.90E+06 | 5.91E+05 | 5.05E+06 | 9.63E+05 | 6.00E+05 | 3.82E+06 |
| 1787.9   | 43.8     | 127 | 2.68E+06 | 3.13E+06 | 6.29E+06 | 2.13E+06 | 9.08E+06 | 9.11E+06 | 1.36E+06 | 6.97E+06 | 1.92E+06 | 1.05E+06 | 4.34E+06 |
| 1289.6   | 24.7     | 15  | 2.18E+05 | 1.75E+05 | 2.49E+05 | 7.10E+03 | 3.38E+05 | 3.27E+05 | 2.31E+05 | 1.24E+05 | 9.74E+04 | 5.87E+04 | 1.29E+05 |
| 1536.8   | 39.2     | 25  | 1.01E+06 | 1.74E+06 | 2.39E+06 | 9.07E+05 | 1.85E+06 | 1.68E+06 | 1.31E+06 | 1.54E+06 | 7.98E+05 | 4.72E+05 | 8.65E+05 |
| 2261.0   | 48.0     | 41  | 2.15E+06 | 4.98E+06 | 3.52E+06 | 2.55E+06 | 4.59E+06 | 3.65E+06 | 2.56E+06 | 2.41E+06 | 2.24E+06 | 1.25E+06 | 2.01E+06 |
| 2973.5   | 55.4     | 23  | 1.97E+05 | 4.61E+05 | 6.32E+05 | 1.72E+05 | 3.90E+05 | 4.08E+05 | 6.81E+04 | 2.08E+05 | 1.89E+05 | 7.35E+04 | 3.07E+05 |
| 1348.7   | 43.1     | 7   | 5.50E+04 | 5.91E+04 | 8.84E+04 | 2.39E+04 | 9.03E+04 | 7.23E+04 | 4.75E+04 | 6.41E+04 | 1.76E+04 | 7.78E+03 | 5.04E+04 |
| 2499.1   | 61.4     | 64  | 2.30E+05 | 2.58E+05 | 4.09E+05 | 8.71E+04 | 4.79E+05 | 4.16E+05 | 7.56E+04 | 2.84E+05 | 1.04E+05 | 8.43E+04 | 1.97E+05 |

14 Supplemental Table S2

| Null-3   | Null-4   | Null-5   | Null-6   | Null-7   | Null-8   | Ratio<br>Null/WT | SD       | p value  | N Ratio | N SD     | N p value | Avg_WT   | Avg_Null |
|----------|----------|----------|----------|----------|----------|------------------|----------|----------|---------|----------|-----------|----------|----------|
| 1.64E+05 | 1.96E+05 | 1.98E+05 | 2.15E+05 | 3.21E+05 | 3.29E+05 | 0.58             | 7.36E-01 | 2.01E-01 | 0.77    | 7.97E-01 | 4.05E-01  | 2.23E+05 | 1.73E+05 |
| 9.39E+04 | 1.16E+05 | 1.10E+05 | 1.32E+05 | 1.48E+05 | 9.51E+04 | 0.59             | 6.06E-01 | 1.50E-01 | 0.77    | 6.48E-01 | 3.26E-01  | 1.05E+05 | 8.11E+04 |
| 7.16E+04 | 6.40E+04 | 3.80E+04 | 1.01E+05 | 7.63E+04 | 7.28E+04 | 0.60             | 4.48E-01 | 2.60E-02 | 0.77    | 4.95E-01 | 1.39E-01  | 6.30E+04 | 4.87E+04 |
| 5.48E+05 | 5.84E+05 | 5.34E+05 | 8.59E+05 | 8.27E+05 | 7.19E+05 | 0.59             | 3.84E-01 | 1.89E-02 | 0.77    | 3.39E-01 | 7.13E-02  | 6.33E+05 | 4.89E+05 |
| 9.06E+04 | 1.38E+05 | 8.25E+04 | 8.82E+04 | 1.31E+05 | 1.53E+05 | 0.55             | 5.76E-01 | 1.21E-01 | 0.77    | 6.34E-01 | 3.03E-01  | 1.10E+05 | 8.52E+04 |
| 2.26E+05 | 1.47E+05 | 1.61E+05 | 3.00E+05 | 2.63E+05 | 2.45E+05 | 0.61             | 3.53E-01 | 3.60E-03 | 0.77    | 3.69E-01 | 4.47E-02  | 2.04E+05 | 1.58E+05 |
| 3.95E+05 | 4.70E+05 | 3.60E+05 | 5.46E+05 | 7.03E+05 | 6.58E+05 | 0.61             | 4.01E-01 | 8.13E-03 | 0.77    | 3.58E-01 | 3.58E-02  | 4.62E+05 | 3.56E+05 |
| 1.20E+05 | 1.37E+05 | 1.81E+05 | 2.35E+05 | 2.30E+05 | 1.53E+05 | 0.60             | 4.49E-01 | 2.58E-02 | 0.77    | 4.62E-01 | 1.18E-01  | 1.60E+05 | 1.24E+05 |
| 9.49E+04 | 1.21E+05 | 9.00E+04 | 1.72E+05 | 1.86E+05 | 1.53E+05 | 0.61             | 4.28E-01 | 1.74E-02 | 0.77    | 4.02E-01 | 7.83E-02  | 1.22E+05 | 9.35E+04 |
| 1.19E+05 | 2.25E+05 | 1.40E+05 | 2.48E+05 | 3.00E+05 | 3.06E+05 | 0.60             | 4.33E-01 | 1.41E-02 | 0.77    | 3.83E-01 | 4.85E-02  | 2.02E+05 | 1.55E+05 |
| 6.34E+04 | 1.09E+05 | 9.97E+04 | 1.19E+05 | 1.93E+05 | 1.46E+05 | 0.58             | 8.87E-01 | 2.09E-01 | 0.77    | 1.05E+00 | 4.46E-01  | 1.22E+05 | 9.37E+04 |
| 3.68E+04 | 1.12E+05 | 8.20E+04 | 9.77E+04 | 1.33E+05 | 1.02E+05 | 0.58             | 5.39E-01 | 5.43E-02 | 0.77    | 5.88E-01 | 1.86E-01  | 9.98E+04 | 7.66E+04 |
| 6.50E+04 | 1.08E+05 | 1.12E+05 | 1.46E+05 | 1.29E+05 | 1.02E+05 | 0.59             | 3.92E-01 | 1.08E-02 | 0.77    | 3.65E-01 | 3.93E-02  | 1.02E+05 | 7.78E+04 |
| 6.22E+05 | 1.58E+06 | 1.13E+06 | 2.33E+06 | 2.70E+06 | 2.86E+06 | 0.61             | 7.77E-01 | 1.59E-01 | 0.77    | 9.11E-01 | 3.90E-01  | 1.81E+06 | 1.39E+06 |
| 1.44E+06 | 2.76E+06 | 1.95E+06 | 3.18E+06 | 4.12E+06 | 4.04E+06 | 0.60             | 6.67E-01 | 1.26E-01 | 0.77    | 7.28E-01 | 3.12E-01  | 2.69E+06 | 2.06E+06 |
| 7.25E+04 | 1.24E+05 | 9.49E+04 | 1.59E+05 | 1.43E+05 | 1.37E+05 | 0.59             | 5.03E-01 | 5.83E-02 | 0.76    | 4.77E-01 | 1.45E-01  | 1.10E+05 | 8.42E+04 |
| 5.33E+05 | 7.30E+05 | 7.08E+05 | 1.23E+06 | 1.56E+06 | 1.08E+06 | 0.61             | 4.67E-01 | 1.88E-02 | 0.76    | 4.45E-01 | 8.36E-02  | 8.50E+05 | 6.49E+05 |
| 1.82E+06 | 1.54E+06 | 1.25E+06 | 2.41E+06 | 2.23E+06 | 2.80E+06 | 0.60             | 3.74E-01 | 8.03E-03 | 0.76    | 3.79E-01 | 6.37E-02  | 1.85E+06 | 1.41E+06 |
| 1.86E+05 | 1.51E+05 | 9.28E+04 | 1.77E+05 | 2.62E+05 | 1.98E+05 | 0.60             | 6.12E-01 | 9.05E-02 | 0.76    | 6.89E-01 | 2.62E-01  | 1.74E+05 | 1.32E+05 |
| 1.33E+04 | 2.56E+04 | 2.24E+04 | 5.70E+04 | 5.31E+04 | 5.06E+04 | 0.61             | 6.12E-01 | 5.79E-02 | 0.76    | 6.47E-01 | 2.00E-01  | 3.25E+04 | 2.47E+04 |
| 1.17E+05 | 1.14E+05 | 1.12E+05 | 2.51E+05 | 2.33E+05 | 1.13E+05 | 0.59             | 5.88E-01 | 7.81E-02 | 0.76    | 6.08E-01 | 2.14E-01  | 1.47E+05 | 1.12E+05 |



| Accession # | Protein                                                                   | # of Pep | PEPTIDE                                     | Modification                                          | XCorr | Charge | m/z [Da] |
|-------------|---------------------------------------------------------------------------|----------|---------------------------------------------|-------------------------------------------------------|-------|--------|----------|
| 568930638   | Basement membrane-specific heparan sulfate proteoglycan core protein      | 8        | IRDQELEDNVHISPNGSIITIVGTRPS<br>NHGAYR       | Deamidated(15)                                        | 5.86  | 4      | 915.7    |
| 19527130    | EMILIN-1                                                                  | 7        | LEDRFNSTLGPSEEQEK                           | Deamidated(6)                                         | 3.32  | 3      | 660.3    |
| 22203747    | Collagen alpha-2(VI) chain                                                | 6        | RHAELSFVFLTDGVTGNDSLEESVH<br>SMR            | Deamidated(17)Oxidation(27)                           | 8.76  | 4      | 788.4    |
| 124494256   | Prolow-density lipoprotein receptor-related protein 1                     | 22       | IETILLNGTDRK                                | Deamidated(7)                                         | 3.87  | 3      | 458.6    |
| 7242187     | Legumain                                                                  | 2        | NGIPDEQIIVMMYDDIANSEENPTPG<br>VVINRPNGTDVYK | Deamidated(1)Deamidated(30)Oxidation(11)Oxidation(12) | 7.75  | 4      | 1088.8   |
| 569006515   | Macrophage expressed gene 1                                               | 1        | ALMDICDQLEKNQTK                             | Carbamidomethyl(6)Deamidated(12)Oxidation(3)          | 3.91  | 3      | 608.6    |
| 254939534   | Peptidyl-prolyl cis-trans isomerase FKBP10                                | 7        | YHYNGSLMDGTLFDSSYSR                         | Deamidated(4)Oxidation(8)                             | 5.33  | 3      | 744.0    |
| 568989825   | Lysyl oxidase-like protein 2                                              | 3        | HYHSMEVFTYYDLLSLNGTK                        | Deamidated(17)Oxidation(5)                            | 6.22  | 3      | 812.4    |
| 226437629   | Embigin                                                                   | 4        | KDDEPLETTGDFNTTK                            | Deamidated(13)                                        | 5.55  | 2      | 906.4    |
| 22094083    | CD48 antigen                                                              | 4        | ITLEVFDVPKPSIEINKTEASTDSCH<br>LR            | Carbamidomethyl(26)Deamidated(17)                     | 4.83  | 4      | 825.2    |
| 31543672    | Synaptonemal complex protein SC65                                         | 1        | EEAMLYHNQTSELR                              | Deamidated(8)Oxidation(4)                             | 4.1   | 3      | 579.9    |
| 86613790    | Collagen alpha-2(V)                                                       | 1        | EASQNLTYICR                                 | Carbamidomethyl(10)Deamidated(5)                      | 3.61  | 2      | 678.3    |
| 46849812    | Fibronectin                                                               | 10       | DQCIVDDITYNVNDTFHK                          | Carbamidomethyl(3)                                    | 3.91  | 3      | 733.3    |
| 160333204   | Transmembrane protein 87A                                                 | 1        | LFQNCSELYK                                  | Carbamidomethyl(5)Deamidated(4)                       | 2.89  | 2      | 651.8    |
| 251823826   | Sushi domain-containing protein 2                                         | 1        | FCILDVMSTGSSSVGNATR                         | Carbamidomethyl(2)Deamidated(16)Oxidation(7)          | 4.45  | 3      | 673.6    |
| 110625851   | Transmembrane protease serine 12                                          | 1        | TREEGNGTTILQEAK                             | Deamidated(6)                                         | 2.98  | 2      | 824.4    |
| 78190502    | Golgi membrane protein 1                                                  | 1        | AVLVNNITTGEK                                | Deamidated(5)Deamidated(6)                            | 3.06  | 2      | 630.3    |
| 569001628   | Inactive tyrosine-protein kinase 7                                        | 3        | STNASFNIK                                   | Deamidated(3)                                         | 3.02  | 2      | 491.7    |
| 189458849   | Carboxypeptidase M                                                        | 1        | SVAQNYSSITHLSIGK                            | Deamidated(5)                                         | 3.95  | 3      | 615.0    |
| 158749638   | Toll-like receptor 2                                                      | 1        | FLNLSSTGIR                                  | Deamidated(3)                                         | 2.68  | 2      | 554.8    |
| 6678347     | Thy-1 membrane glycoprotein                                               | 3        | HENNTKDNSIQHEFSLTR                          | Deamidated(3)                                         | 6.58  | 3      | 724.3    |
| 21630263    | Inhibitor of nuclear factor kappa-B kinase-interacting protein, isoform 2 | 2        | ISNLTVVQAAIK                                | Deamidated(3)                                         | 3.76  | 2      | 629.4    |
| 170650603   | EGF, latrophilin seven transmembrane domain-containing protein 1          | 2        | DAHFNSTLTEFGETINNFVER                       | Deamidated(5)                                         | 6.53  | 3      | 814.7    |
| 239787900   | Thrombospondin-2                                                          | 1        | VVNSTTGTGEHLR                               | Deamidated(3)                                         | 4.26  | 3      | 457.9    |

| MH+ [Da] | RT [min] | PSM | WT-1     | WT-2     | WT-3     | WT-4     | WT-5     | WT-5-2   | WT-6     | WT-7     | WT-8     | Null-1   | Null-2   |
|----------|----------|-----|----------|----------|----------|----------|----------|----------|----------|----------|----------|----------|----------|
| 3659.8   | 38.4     | 18  | 7.81E+05 | 9.94E+05 | 1.59E+06 | 5.54E+05 | 1.57E+06 | 1.35E+06 | 1.10E+05 | 8.84E+05 | 4.06E+05 | 6.40E+05 | 6.33E+05 |
| 1978.9   | 29.9     | 80  | 1.02E+05 | 1.29E+05 | 1.80E+05 | 8.28E+04 | 2.63E+05 | 2.21E+05 | 8.75E+04 | 1.42E+05 | 4.38E+04 | 7.86E+04 | 1.09E+05 |
| 3150.5   | 46.2     | 47  | 6.54E+05 | 4.88E+05 | 2.78E+06 | 7.36E+05 | 1.85E+06 | 1.86E+06 | 1.32E+05 | 9.50E+05 | 2.96E+05 | 1.77E+05 | 4.84E+05 |
| 1373.8   | 32.9     | 3   | 3.00E+05 | 1.59E+05 | 2.55E+05 | 1.42E+05 | 3.42E+05 | 3.51E+05 | 1.47E+05 | 1.87E+05 | 1.12E+05 | 9.49E+04 | 9.82E+04 |
| 4352.0   | 59.3     | 112 | 4.19E+05 | 7.82E+05 | 9.06E+05 | 3.42E+05 | 6.14E+05 | 5.74E+05 | 1.84E+05 | 7.03E+05 | 5.20E+05 | 1.77E+05 | 4.37E+05 |
| 1823.9   | 33.4     | 2   | 1.98E+05 | 1.95E+05 | 3.69E+05 | 5.49E+04 | 3.56E+05 | 3.58E+05 | 1.66E+05 | 1.15E+05 | 6.98E+04 | 4.65E+04 | 1.14E+05 |
| 2229.9   | 40.8     | 63  | 2.82E+06 | 4.60E+06 | 3.72E+06 | 1.92E+06 | 2.99E+06 | 2.70E+06 | 1.68E+06 | 1.64E+06 | 1.33E+06 | 3.44E+05 | 1.07E+06 |
| 2435.1   | 48.8     | 17  | 7.61E+04 | 2.28E+05 | 2.52E+05 | 1.71E+05 | 2.48E+05 | 2.06E+05 | 4.88E+04 | 1.20E+05 | 7.21E+04 | 6.05E+04 | 1.10E+05 |
| 1811.8   | 30.1     | 28  | 3.22E+05 | 4.19E+05 | 3.33E+05 | 2.35E+05 | 4.11E+05 | 3.73E+05 | 3.13E+05 | 3.53E+05 | 3.14E+05 | 1.07E+05 | 1.65E+05 |
| 3297.7   | 44.3     | 2   | 1.00E+05 | 7.26E+04 | 1.50E+05 | 2.78E+04 | 1.19E+05 | 1.58E+05 | 2.61E+04 | 5.93E+04 | 2.07E+04 | 2.34E+04 | 5.20E+04 |
| 1737.8   | 26.4     | 28  | 9.51E+05 | 9.97E+05 | 1.12E+06 | 2.35E+04 | 1.45E+06 | 1.13E+06 | 6.70E+05 | 8.26E+05 | 3.40E+05 | 2.13E+05 | 4.66E+05 |
| 1355.6   | 32.4     | 18  | 4.64E+05 | 3.82E+05 | 6.79E+05 | 1.98E+05 | 1.05E+06 | 1.08E+06 | 4.24E+05 | 3.94E+05 | 1.49E+05 | 2.05E+05 | 3.24E+05 |
| 2198.0   | 44.5     | 589 | 6.95E+05 | 1.04E+06 | 1.38E+06 | 6.18E+05 | 1.52E+06 | 1.42E+06 | 3.56E+05 | 6.69E+05 | 4.04E+05 | 4.11E+05 | 5.97E+05 |
| 1302.6   | 35.2     | 5   | 2.84E+05 | 3.28E+05 | 4.42E+05 | 1.49E+05 | 4.55E+05 | 4.36E+05 | 2.27E+05 | 2.40E+05 | 1.45E+05 | 8.18E+04 | 1.81E+05 |
| 2018.9   | 45.3     | 12  | 1.21E+05 | 1.31E+05 | 1.57E+05 | 6.84E+04 | 2.28E+05 | 1.99E+05 | 9.53E+04 | 1.42E+05 | 6.48E+04 | 4.14E+04 | 1.65E+05 |
| 1647.8   | 36.8     | 3   | 5.93E+04 | 7.24E+04 | 1.19E+05 | 4.45E+04 | 1.46E+05 | 1.16E+05 | 4.22E+04 | 6.79E+04 | 3.43E+04 | 2.88E+04 | 5.22E+04 |
| 1259.7   | 33.5     | 31  | 7.68E+04 | 1.30E+05 | 2.27E+05 | 2.80E+04 | 1.64E+05 | 1.19E+05 | 1.07E+05 | 9.87E+04 | 6.84E+04 | 3.09E+04 | 6.78E+04 |
| 982.5    | 28.2     | 11  | 3.12E+05 | 3.71E+05 | 4.80E+05 | 6.06E+03 | 4.12E+05 | 3.29E+05 | 2.44E+05 | 2.81E+05 | 1.60E+05 | 7.35E+04 | 1.69E+05 |
| 1842.9   | 31.8     | 6   | 6.38E+04 | 5.69E+04 | 1.33E+05 | 3.77E+04 | 1.62E+05 | 1.18E+05 | 5.73E+04 | 5.36E+04 | 2.98E+04 | 2.76E+04 | 8.10E+04 |
| 1108.6   | 43.5     | 1   | 2.31E+05 | 2.69E+05 | 3.94E+05 | 1.22E+05 | 3.93E+05 | 3.39E+05 | 1.74E+05 | 2.28E+05 | 1.06E+05 | 8.44E+04 | 1.81E+05 |
| 2171.0   | 27.5     | 58  | 5.22E+05 | 2.26E+05 | 4.00E+05 | 2.17E+04 | 5.09E+05 | 4.31E+05 | 9.34E+04 | 1.84E+05 | 1.28E+05 | 1.28E+05 | 6.30E+04 |
| 1257.7   | 43.1     | 21  | 1.74E+06 | 2.08E+06 | 2.57E+06 | 1.05E+06 | 3.20E+06 | 2.74E+06 | 6.31E+05 | 2.05E+06 | 7.07E+05 | 7.17E+05 | 1.37E+06 |
| 2442.1   | 62.2     | 8   | 1.28E+05 | 2.67E+05 | 4.42E+05 | 1.03E+05 | 4.58E+05 | 4.38E+05 | 2.25E+04 | 2.37E+05 | 8.30E+04 | 4.68E+04 | 1.72E+05 |
| 1371.7   | 19.7     | 35  | 2.16E+06 | 2.27E+06 | 2.11E+06 | 1.49E+02 | 1.65E+06 | 1.46E+03 | 5.11E+05 | 1.41E+06 | 4.16E+05 | 2.96E+05 | 7.02E+05 |

14 Supplemental Table S2

| Null-3   | Null-4   | Null-5   | Null-6   | Null-7   | Null-8   | Ratio<br>Null/WT | SD       | p value  | N Ratio | N SD     | N p value | Avg_WT   | Avg_Null |
|----------|----------|----------|----------|----------|----------|------------------|----------|----------|---------|----------|-----------|----------|----------|
| 4.09E+05 | 4.54E+05 | 3.48E+05 | 6.45E+05 | 6.63E+05 | 3.50E+05 | 0.57             | 4.73E-01 | 5.27E-02 | 0.76    | 5.75E-01 | 1.92E-01  | 5.17E+05 | 3.92E+05 |
| 6.32E+04 | 7.64E+04 | 6.32E+04 | 6.84E+04 | 9.60E+04 | 6.57E+04 | 0.56             | 4.05E-01 | 3.25E-02 | 0.76    | 4.63E-01 | 1.21E-01  | 7.73E+04 | 5.86E+04 |
| 3.92E+05 | 4.77E+05 | 5.22E+05 | 1.21E+06 | 1.03E+06 | 7.06E+05 | 0.58             | 7.88E-01 | 1.80E-01 | 0.76    | 8.80E-01 | 3.85E-01  | 5.89E+05 | 4.47E+05 |
| 1.06E+05 | 1.18E+05 | 1.05E+05 | 2.19E+05 | 1.32E+05 | 1.49E+05 | 0.58             | 4.26E-01 | 1.80E-02 | 0.76    | 4.06E-01 | 6.10E-02  | 1.25E+05 | 9.50E+04 |
| 3.22E+05 | 2.04E+05 | 2.78E+05 | 5.62E+05 | 5.04E+05 | 3.43E+05 | 0.63             | 4.98E-01 | 3.65E-02 | 0.76    | 5.85E-01 | 1.99E-01  | 3.41E+05 | 2.58E+05 |
| 9.39E+04 | 1.12E+05 | 1.03E+05 | 1.59E+05 | 1.74E+05 | 1.52E+05 | 0.57             | 5.36E-01 | 6.84E-02 | 0.76    | 5.29E-01 | 1.78E-01  | 1.15E+05 | 8.69E+04 |
| 8.60E+05 | 1.87E+06 | 1.40E+06 | 2.30E+06 | 2.44E+06 | 2.34E+06 | 0.61             | 5.52E-01 | 4.04E-02 | 0.76    | 6.13E-01 | 1.81E-01  | 1.49E+06 | 1.13E+06 |
| 1.17E+05 | 7.61E+04 | 5.38E+04 | 1.10E+05 | 1.03E+05 | 8.80E+04 | 0.57             | 4.42E-01 | 3.68E-02 | 0.76    | 5.31E-01 | 1.56E-01  | 8.90E+04 | 6.74E+04 |
| 1.87E+05 | 1.79E+05 | 1.63E+05 | 3.18E+05 | 2.96E+05 | 2.86E+05 | 0.62             | 3.27E-01 | 1.85E-03 | 0.76    | 4.10E-01 | 6.21E-02  | 2.05E+05 | 1.55E+05 |
| 1.71E+04 | 5.10E+04 | 4.38E+04 | 6.89E+04 | 5.60E+04 | 6.17E+04 | 0.57             | 5.94E-01 | 9.38E-02 | 0.76    | 6.46E-01 | 2.52E-01  | 4.48E+04 | 3.40E+04 |
| 3.00E+05 | 5.53E+05 | 4.04E+05 | 6.55E+05 | 6.93E+05 | 6.65E+05 | 0.59             | 5.23E-01 | 5.49E-02 | 0.76    | 5.20E-01 | 1.55E-01  | 4.74E+05 | 3.59E+05 |
| 2.54E+05 | 3.39E+05 | 1.87E+05 | 3.29E+05 | 3.51E+05 | 3.88E+05 | 0.55             | 4.85E-01 | 6.88E-02 | 0.76    | 4.90E-01 | 1.78E-01  | 2.92E+05 | 2.21E+05 |
| 5.72E+05 | 5.89E+05 | 3.40E+05 | 4.17E+05 | 5.05E+05 | 5.90E+05 | 0.56             | 3.91E-01 | 3.01E-02 | 0.76    | 4.62E-01 | 1.09E-01  | 5.04E+05 | 3.81E+05 |
| 1.46E+05 | 2.01E+05 | 1.38E+05 | 2.15E+05 | 2.36E+05 | 1.97E+05 | 0.58             | 4.02E-01 | 1.62E-02 | 0.76    | 3.74E-01 | 4.87E-02  | 1.70E+05 | 1.29E+05 |
| 4.00E+04 | 6.50E+04 | 4.67E+04 | 8.76E+04 | 8.07E+04 | 1.07E+05 | 0.59             | 5.58E-01 | 3.56E-02 | 0.75    | 5.92E-01 | 1.55E-01  | 7.64E+04 | 5.76E+04 |
| 3.91E+04 | 3.10E+04 | 4.24E+04 | 5.90E+04 | 5.39E+04 | 4.79E+04 | 0.57             | 4.29E-01 | 3.60E-02 | 0.75    | 3.94E-01 | 8.91E-02  | 4.36E+04 | 3.28E+04 |
| 5.90E+04 | 4.70E+04 | 6.37E+04 | 1.07E+05 | 8.23E+04 | 7.87E+04 | 0.59             | 5.07E-01 | 5.02E-02 | 0.75    | 5.13E-01 | 1.48E-01  | 6.52E+04 | 4.91E+04 |
| 1.50E+05 | 1.85E+05 | 1.09E+05 | 2.12E+05 | 2.49E+05 | 2.32E+05 | 0.60             | 5.01E-01 | 4.62E-02 | 0.75    | 5.09E-01 | 1.44E-01  | 1.67E+05 | 1.26E+05 |
| 3.79E+04 | 2.70E+04 | 2.70E+04 | 7.64E+04 | 4.58E+04 | 3.09E+04 | 0.56             | 6.10E-01 | 6.78E-02 | 0.75    | 6.54E-01 | 2.01E-01  | 4.34E+04 | 3.26E+04 |
| 8.14E+04 | 1.39E+05 | 1.32E+05 | 1.70E+05 | 1.72E+05 | 2.00E+05 | 0.58             | 4.26E-01 | 2.13E-02 | 0.75    | 3.92E-01 | 6.37E-02  | 1.42E+05 | 1.06E+05 |
| 1.31E+05 | 9.49E+04 | 1.15E+05 | 3.59E+05 | 2.74E+05 | 1.17E+05 | 0.57             | 7.50E-01 | 1.25E-01 | 0.75    | 8.24E-01 | 3.06E-01  | 1.56E+05 | 1.17E+05 |
| 7.71E+05 | 1.10E+06 | 7.42E+05 | 1.13E+06 | 1.44E+06 | 1.31E+06 | 0.58             | 4.40E-01 | 3.41E-02 | 0.75    | 4.33E-01 | 1.15E-01  | 1.05E+06 | 7.90E+05 |
| 1.33E+05 | 8.46E+04 | 1.11E+05 | 1.98E+05 | 1.51E+05 | 2.12E+05 | 0.57             | 6.36E-01 | 1.16E-01 | 0.75    | 6.90E-01 | 2.73E-01  | 1.35E+05 | 1.01E+05 |
| 9.79E+05 | 1.05E+06 | 2.62E+05 | 4.99E+05 | 7.58E+05 | 9.47E+05 | 0.59             | 7.35E-01 | 1.77E-01 | 0.75    | 9.43E-01 | 4.03E-01  | 6.89E+05 | 5.16E+05 |

14 Supplemental Table S2

| Accession # | Protein                                                                   | # of Pep | PEPTIDE                         | Modification                                                                  | XCorr | Charge | m/z [Da] |
|-------------|---------------------------------------------------------------------------|----------|---------------------------------|-------------------------------------------------------------------------------|-------|--------|----------|
| 568939694   | Serum paraoxonase/arylesterase 2                                          | 2        | QPNMNLTLQLK                     | Deamidated(5)Oxidation(4)                                                     | 2.68  | 2      | 602.3    |
| 124487171   | Probable G-protein coupled receptor 116                                   | 3        | ENVTCQDPIIGIDPGK                | Carbamidomethyl(5)Deamidated(2)                                               | 3.28  | 2      | 907.4    |
| 568930638   | Basement membrane-specific heparan sulfate proteoglycan core protein      | 8        | LTVPSSQNSSFR                    | Deamidated(8)                                                                 | 2.99  | 2      | 662.3    |
| 29789020    | H-2 class II histocompatibility antigen gamma chain                       | 1        | YGNMTQDHVMHLLTR                 | Deamidated(3)Oxidation(4)Oxidation(10)                                        | 4.08  | 3      | 617.0    |
| 124487171   | Probable G-protein coupled receptor 116                                   | 3        | LLQQQSNQSSQFLHSVER              | Deamidated(7)                                                                 | 4.68  | 3      | 710.7    |
| 47078285    | KDEL (Lys-Asp-Glu-Leu) containing 2 protein                               | 1        | YFFLQSVSDSDGRNFTSSPPGQTQF K     | Deamidated(13)                                                                | 4.86  | 3      | 952.1    |
| 568926396   | Tenascin                                                                  | 12       | EPEIGNLNVSDVTPK                 | Deamidated(6)Deamidated(8)                                                    | 2.48  | 2      | 806.4    |
| 13385294    | prenylcysteine oxidase 1                                                  | 2        | KMSNITFR                        | Deamidated(4)Oxidation(2)                                                     | 2.57  | 2      | 507.3    |
| 755534805   | N-acetylglucosamine-1-phosphotransferase                                  | 4        | VTIVTHQDIFQNLSHLPTFSSPAIES HIHR | Deamidated(12)                                                                | 5.17  | 5      | 686.0    |
| 6677905     | Golgi apparatus protein 1                                                 | 3        | GNITEYQCHQYITK                  | Carbamidomethyl(8)Deamidated(2)                                               | 4.55  | 2      | 878.4    |
| 89242146    | Niemann Pick type C1                                                      | 6        | LYNVTHQFCNASVMDPTCVR            | Carbamidomethyl(9)Carbamidomethyl(18)Deamidated(3)Deamidated(10)Oxidation(14) | 5.03  | 3      | 810.7    |
| 568913714   | Angiopietin-related protein 2                                             | 2        | FQHLAMLAHNQSEVIAQLEEHCCR        | Carbamidomethyl(22)Deamidated(10)Oxidation(6)                                 | 5.9   | 4      | 727.3    |
| 6680878     | Lysosome membrane protein                                                 | 7        | AYVFERNQSVGDPNVDLIR             | Deamidated(7)                                                                 | 3.44  | 3      | 731.7    |
| 755530199   | Integrin alpha-11                                                         | 3        | YIASDPDDKHFFNVTDEAALKDIVDALGDR  | Deamidated(13)                                                                | 4.9   | 4      | 838.7    |
| 160707889   | Adipocyte enhancer-binding protein 1                                      | 1        | GVVTDEQGIPIANATISVSGINHGVK      | Deamidated(13)                                                                | 5.71  | 3      | 859.8    |
| 153791270   | Laminin subunit gamma-1                                                   | 12       | KYEQAKNISQDLEK                  | Deamidated(7)                                                                 | 5.69  | 3      | 565.6    |
| 21630263    | Inhibitor of nuclear factor kappa-B kinase-interacting protein, isoform 2 | 2        | QGTLNNTLTR                      | Deamidated(5)                                                                 | 3.65  | 2      | 559.8    |
| 153791389   | Integrin alpha-1                                                          | 13       | LDLPVNTSIPNVTEIKENMTFGSTLV TNPK | Deamidated(11)Deamidated(18)Deamidated(28)Oxidation(19)                       | 5.61  | 3      | 1097.6   |
| 755534805   | N-acetylglucosamine-1-phosphotransferase                                  | 4        | VPMLVLDPPLPANCTLK               | Carbamidomethyl(14)Deamidated(13)Oxidation(3)                                 | 3.04  | 2      | 948.0    |
| 30089697    | ADAMTS-like protein 4                                                     | 2        | EVQCLSGNQTLSSR                  | Carbamidomethyl(4)Deamidated(8)                                               | 3.83  | 2      | 790.4    |
| 124494256   | Pro-low-density lipoprotein receptor-related protein 1                    | 22       | GVTHLNISGLK                     | Deamidated(6)                                                                 | 4.31  | 2      | 570.3    |
| 755522163   | Integrin alpha-M                                                          | 8        | AVNQTGALYQCDYSTSR               | Carbamidomethyl(11)Deamidated(3)                                              | 5.51  | 2      | 967.9    |

14 Supplemental Table S2

| MH+ [Da] | RT [min] | PSM | WT-1     | WT-2     | WT-3     | WT-4     | WT-5     | WT-5-2   | WT-6     | WT-7     | WT-8     | Null-1   | Null-2   |
|----------|----------|-----|----------|----------|----------|----------|----------|----------|----------|----------|----------|----------|----------|
| 1203.6   | 27.6     | 15  | 4.14E+05 | 2.91E+05 | 4.95E+05 | 6.52E+04 | 7.25E+05 | 6.16E+05 | 3.15E+05 | 3.10E+05 | 1.70E+05 | 1.44E+05 | 2.30E+05 |
| 1813.9   | 43.3     | 2   | 6.42E+04 | 5.72E+04 | 7.59E+04 | 1.07E+04 | 1.26E+05 | 1.01E+05 | 4.32E+04 | 3.13E+04 | 3.68E+04 | 1.42E+04 | 4.93E+04 |
| 1323.7   | 31.4     | 18  | 2.17E+06 | 2.49E+06 | 3.33E+06 | 1.53E+06 | 3.80E+06 | 3.33E+06 | 1.07E+06 | 2.16E+06 | 1.08E+06 | 1.94E+06 | 1.41E+06 |
| 1848.8   | 27.1     | 38  | 8.70E+05 | 4.18E+05 | 6.79E+05 | 1.23E+05 | 8.89E+05 | 7.35E+05 | 2.71E+05 | 5.01E+05 | 1.20E+05 | 2.00E+05 | 3.78E+05 |
| 2130.1   | 34.2     | 11  | 6.91E+05 | 5.72E+05 | 8.24E+05 | 2.94E+05 | 1.31E+06 | 1.16E+06 | 4.54E+05 | 6.81E+05 | 3.03E+05 | 2.49E+05 | 4.33E+05 |
| 2854.3   | 48.8     | 14  | 1.07E+05 | 1.60E+05 | 1.54E+05 | 8.43E+04 | 2.97E+05 | 3.11E+05 | 5.93E+04 | 1.11E+05 | 8.50E+04 | 3.56E+04 | 7.22E+04 |
| 1611.8   | 41.8     | 79  | 8.60E+06 | 1.02E+07 | 2.02E+07 | 1.21E+07 | 2.05E+07 | 1.77E+07 | 4.68E+06 | 1.77E+07 | 6.93E+06 | 6.50E+06 | 9.35E+06 |
| 1013.5   | 22.8     | 5   | 5.41E+05 | 3.69E+05 | 6.45E+05 | 9.17E+02 | 8.01E+05 | 7.40E+05 | 3.47E+05 | 3.63E+05 | 1.54E+05 | 1.73E+05 | 2.53E+05 |
| 3425.8   | 49.4     | 6   | 3.18E+04 | 3.24E+04 | 1.10E+05 | 2.16E+04 | 6.49E+04 | 6.10E+04 | 2.91E+03 | 4.13E+04 | 1.30E+04 | 6.18E+03 | 2.70E+04 |
| 1755.8   | 27.6     | 26  | 2.72E+05 | 1.90E+05 | 3.56E+05 | 1.15E+05 | 4.18E+05 | 3.80E+05 | 1.87E+05 | 1.81E+05 | 1.06E+05 | 7.12E+04 | 1.76E+05 |
| 2430.1   | 39.4     | 9   | 9.85E+04 | 1.20E+05 | 1.98E+05 | 3.46E+04 | 2.38E+05 | 2.41E+05 | 1.12E+05 | 1.05E+05 | 4.60E+04 | 4.41E+04 | 8.30E+04 |
| 2906.4   | 40.1     | 17  | 1.40E+05 | 1.50E+05 | 3.45E+05 | 8.15E+04 | 4.87E+05 | 4.28E+05 | 2.36E+04 | 1.99E+05 | 6.56E+04 | 5.74E+04 | 2.12E+05 |
| 2193.1   | 41.8     | 15  | 7.16E+05 | 3.45E+05 | 7.20E+05 | 2.75E+05 | 7.16E+05 | 7.46E+05 | 1.59E+05 | 3.42E+05 | 2.00E+05 | 2.37E+05 | 1.85E+05 |
| 3351.6   | 59.9     | 9   | 1.43E+05 | 2.18E+05 | 2.69E+05 | 1.31E+05 | 2.48E+05 | 1.70E+05 | 7.30E+03 | 1.15E+05 | 3.86E+04 | 2.61E+04 | 8.02E+04 |
| 2577.4   | 45.8     | 69  | 3.35E+06 | 6.20E+06 | 8.42E+06 | 3.97E+06 | 6.66E+06 | 6.67E+06 | 1.24E+06 | 6.15E+06 | 2.96E+06 | 1.72E+06 | 4.30E+06 |
| 1694.9   | 24.4     | 5   | 1.94E+05 | 6.42E+04 | 1.52E+05 | 0.00E+00 | 4.16E+05 | 3.42E+05 | 6.58E+04 | 7.17E+04 | 7.22E+04 | 8.58E+04 | 2.05E+04 |
| 1118.6   | 26.3     | 18  | 9.44E+05 | 7.88E+05 | 8.92E+05 | 3.94E+03 | 1.23E+06 | 1.05E+06 | 5.09E+05 | 7.41E+05 | 3.12E+05 | 2.71E+05 | 4.12E+05 |
| 3290.7   | 55.6     | 25  | 1.86E+05 | 3.22E+05 | 4.53E+05 | 1.24E+05 | 5.07E+05 | 4.77E+05 | 5.44E+04 | 2.96E+05 | 9.40E+04 | 5.26E+04 | 2.27E+05 |
| 1895.0   | 53.3     | 1   | 6.54E+04 | 9.73E+04 | 1.68E+05 | 5.14E+04 | 1.87E+05 | 1.49E+05 | 4.47E+04 | 9.68E+04 | 5.22E+04 | 3.69E+04 | 7.40E+04 |
| 1579.7   | 27.6     | 18  | 1.97E+05 | 1.64E+05 | 2.97E+05 | 1.11E+05 | 5.29E+05 | 4.49E+05 | 1.85E+05 | 1.87E+05 | 9.38E+04 | 1.03E+05 | 1.66E+05 |
| 1139.6   | 32.9     | 16  | 6.96E+05 | 1.21E+06 | 1.12E+06 | 4.10E+05 | 1.05E+06 | 9.18E+05 | 6.80E+05 | 6.05E+05 | 3.28E+05 | 2.10E+05 | 4.93E+05 |
| 1934.9   | 31.6     | 18  | 1.79E+05 | 2.52E+05 | 2.55E+05 | 1.34E+05 | 2.15E+05 | 2.34E+05 | 1.89E+05 | 1.08E+05 | 1.23E+05 | 6.72E+04 | 1.31E+05 |

14 Supplemental Table S2

| Null-3   | Null-4   | Null-5   | Null-6   | Null-7   | Null-8   | Ratio<br>Null/WT | SD       | p value  | N Ratio | N SD     | N p value | Avg_WT   | Avg_Null |
|----------|----------|----------|----------|----------|----------|------------------|----------|----------|---------|----------|-----------|----------|----------|
| 1.54E+05 | 1.73E+05 | 1.95E+05 | 3.43E+05 | 2.71E+05 | 2.06E+05 | 0.57             | 4.89E-01 | 5.08E-02 | 0.75    | 4.60E-01 | 1.17E-01  | 2.11E+05 | 1.58E+05 |
| 2.08E+04 | 1.68E+04 | 4.84E+04 | 4.49E+04 | 1.68E+04 | 6.65E+04 | 0.57             | 6.66E-01 | 8.46E-02 | 0.75    | 7.11E-01 | 2.24E-01  | 3.40E+04 | 2.54E+04 |
| 9.68E+05 | 1.20E+06 | 8.77E+05 | 1.17E+06 | 1.56E+06 | 1.16E+06 | 0.55             | 3.84E-01 | 1.46E-02 | 0.75    | 5.13E-01 | 9.96E-02  | 1.32E+06 | 9.85E+05 |
| 9.62E+04 | 3.68E+05 | 2.27E+05 | 3.23E+05 | 3.20E+05 | 3.93E+05 | 0.56             | 5.34E-01 | 6.22E-02 | 0.74    | 6.09E-01 | 2.01E-01  | 2.85E+05 | 2.12E+05 |
| 3.02E+05 | 3.74E+05 | 3.67E+05 | 5.04E+05 | 4.79E+05 | 4.41E+05 | 0.56             | 4.10E-01 | 3.33E-02 | 0.74    | 3.58E-01 | 7.85E-02  | 3.92E+05 | 2.92E+05 |
| 4.06E+04 | 9.86E+04 | 7.62E+04 | 1.56E+05 | 9.19E+04 | 1.30E+05 | 0.58             | 6.19E-01 | 8.27E-02 | 0.74    | 6.27E-01 | 1.85E-01  | 8.53E+04 | 6.34E+04 |
| 7.60E+06 | 9.33E+06 | 3.97E+06 | 5.77E+06 | 8.59E+06 | 8.58E+06 | 0.57             | 4.02E-01 | 2.22E-02 | 0.74    | 5.09E-01 | 1.28E-01  | 7.58E+06 | 5.63E+06 |
| 2.16E+05 | 2.05E+05 | 2.13E+05 | 3.48E+05 | 2.83E+05 | 2.64E+05 | 0.56             | 4.61E-01 | 6.05E-02 | 0.74    | 4.50E-01 | 1.51E-01  | 2.45E+05 | 1.82E+05 |
| 1.55E+04 | 1.60E+04 | 2.47E+04 | 4.33E+04 | 2.98E+04 | 2.98E+04 | 0.57             | 7.12E-01 | 1.50E-01 | 0.74    | 7.95E-01 | 3.22E-01  | 2.34E+04 | 1.73E+04 |
| 8.32E+04 | 1.41E+05 | 1.19E+05 | 1.57E+05 | 2.23E+05 | 1.37E+05 | 0.56             | 4.69E-01 | 2.90E-02 | 0.74    | 4.29E-01 | 6.53E-02  | 1.36E+05 | 1.01E+05 |
| 5.05E+04 | 7.69E+04 | 5.79E+04 | 8.14E+04 | 9.78E+04 | 9.95E+04 | 0.56             | 4.79E-01 | 5.32E-02 | 0.74    | 4.44E-01 | 1.23E-01  | 7.33E+04 | 5.43E+04 |
| 6.79E+04 | 1.08E+05 | 8.12E+04 | 1.21E+05 | 1.55E+05 | 1.43E+05 | 0.55             | 6.74E-01 | 1.36E-01 | 0.74    | 7.40E-01 | 2.90E-01  | 1.16E+05 | 8.61E+04 |
| 2.55E+05 | 1.75E+05 | 2.17E+05 | 4.30E+05 | 3.48E+05 | 2.20E+05 | 0.55             | 4.80E-01 | 3.90E-02 | 0.74    | 5.23E-01 | 1.27E-01  | 2.62E+05 | 1.93E+05 |
| 4.54E+04 | 1.07E+05 | 3.57E+04 | 1.28E+05 | 1.33E+05 | 1.27E+05 | 0.57             | 6.41E-01 | 8.24E-02 | 0.74    | 7.09E-01 | 2.30E-01  | 8.27E+04 | 6.09E+04 |
| 2.62E+06 | 3.54E+06 | 1.54E+06 | 2.85E+06 | 3.32E+06 | 3.57E+06 | 0.58             | 4.49E-01 | 2.66E-02 | 0.74    | 5.23E-01 | 1.29E-01  | 2.95E+06 | 2.18E+06 |
| 1.02E+05 | 4.08E+04 | 4.62E+04 | 2.06E+05 | 1.22E+05 | 2.37E+04 | 0.53             | 8.97E-01 | 1.92E-01 | 0.74    | 1.07E+00 | 4.09E-01  | 8.25E+04 | 6.08E+04 |
| 2.85E+05 | 4.12E+05 | 3.28E+05 | 4.86E+05 | 5.67E+05 | 5.22E+05 | 0.57             | 4.57E-01 | 4.49E-02 | 0.74    | 4.24E-01 | 1.19E-01  | 4.11E+05 | 3.02E+05 |
| 1.36E+05 | 1.01E+05 | 1.45E+05 | 2.43E+05 | 2.27E+05 | 1.25E+05 | 0.56             | 5.95E-01 | 7.83E-02 | 0.73    | 6.53E-01 | 2.07E-01  | 1.56E+05 | 1.15E+05 |
| 4.57E+04 | 5.63E+04 | 4.66E+04 | 6.17E+04 | 6.73E+04 | 6.39E+04 | 0.56             | 4.23E-01 | 3.97E-02 | 0.73    | 4.03E-01 | 9.69E-02  | 5.73E+04 | 4.20E+04 |
| 8.91E+04 | 1.45E+05 | 8.92E+04 | 1.69E+05 | 1.63E+05 | 1.40E+05 | 0.54             | 4.72E-01 | 5.75E-02 | 0.73    | 4.56E-01 | 1.18E-01  | 1.35E+05 | 9.86E+04 |
| 2.99E+05 | 3.58E+05 | 3.58E+05 | 6.05E+05 | 6.75E+05 | 5.88E+05 | 0.58             | 4.44E-01 | 1.65E-02 | 0.73    | 4.28E-01 | 6.52E-02  | 4.44E+05 | 3.25E+05 |
| 1.04E+05 | 1.11E+05 | 7.85E+04 | 1.20E+05 | 1.06E+05 | 1.30E+05 | 0.56             | 2.91E-01 | 2.12E-03 | 0.73    | 3.05E-01 | 1.49E-02  | 1.08E+05 | 7.91E+04 |

14 Supplemental Table S2

| Accession # | Protein                                                  | # of Pep | PEPTIDE                              | Modification                                                                           | XCorr | Charge | m/z [Da] |
|-------------|----------------------------------------------------------|----------|--------------------------------------|----------------------------------------------------------------------------------------|-------|--------|----------|
| 6681143     | Decorin                                                  | 3        | YIQVVYLHNNNISAVGQNDFCR               | Carbamidomethyl(21)Deamidated(10)<br>)Deamidated(11)                                   | 3.18  | 4      | 657.1    |
| 755498697   | Fibrillin-1                                              | 5        | NYYADNQTCDGELLFNMTKK                 | Carbamidomethyl(9)Deamidated(6)D<br>eamidated(16)Oxidation(17)                         | 4.24  | 3      | 815.0    |
| 568912521   | Plexin domain containing 2                               | 1        | GFTDLLLDDGQDNNTQIEEDTDHNY<br>YISR    | Deamidated(13)                                                                         | 8.57  | 3      | 1134.8   |
| 755522163   | Integrin alpha-M                                         | 8        | YLNFTASEMTSK                         | Deamidated(3)Oxidation(9)                                                              | 2.94  | 2      | 704.8    |
| 254939534   | Peptidyl-prolyl cis-trans<br>isomerase FKBP10            | 7        | YHYNGTFEDGKK                         | Deamidated(4)                                                                          | 4.4   | 3      | 487.2    |
| 124494256   | Prolow-density lipoprotein<br>receptor-related protein 1 | 22       | VDIPQQPMGIIAVANDTNSCELSPC<br>R       | Carbamidomethyl(20)Carbamidomet<br>hyl(25)Deamidated(15)Deamidated(<br>18)Oxidation(8) | 6.27  | 3      | 968.1    |
| 269315863   | Collagen alpha-5(VI)                                     | 7        | DLQNFLNVTSSVDVK                      | Deamidated(8)                                                                          | 4.63  | 2      | 904.9    |
| 34328108    | Collagen alpha-1(I) chain                                | 1        | LMSTEASQNITYHCK                      | Carbamidomethyl(14)Deamidated(9)<br>Oxidation(2)                                       | 4.82  | 3      | 600.6    |
| 6679731     | Coagulation factor V                                     | 1        | VSTVTLVSATSTTANMTMSPEGR              | Deamidated(15)Oxidation(16)Oxidati<br>on(18)                                           | 3.89  | 3      | 792.0    |
| 254588077   | Multimerin-1                                             | 3        | LNQLNFQNIYQLFNETTSQVNK               | Deamidated(14)                                                                         | 5.39  | 3      | 886.4    |
| 568958751   | Hypoxia up-regulated protein                             | 7        | AEPPLNASAGDQEEK                      | Deamidated(6)                                                                          | 3.07  | 2      | 778.9    |
| 225903442   | Integrin alpha-5                                         | 6        | IYLRNESEFR                           | Deamidated(5)                                                                          | 3.33  | 2      | 664.3    |
| 224922773   | Olfactomedin-like protein 2B                             | 2        | VDKLEEEVSKNLTK                       | Deamidated(11)                                                                         | 3.19  | 3      | 545.0    |
| 22203747    | Collagen alpha-2(VI) chain                               | 6        | RGTFTDCALANMTQQIR                    | Carbamidomethyl(7)Deamidated(11)<br>Oxidation(12)                                      | 4.74  | 3      | 667.3    |
| 6677691     | Reticulocalbin-1                                         | 1        | VVRPDELGERPPEDNQSFDYDHE<br>AFLGKEDSK | Deamidated(16)                                                                         | 5.99  | 5      | 764.8    |
| 124301217   | VPS10 domain-containing<br>receptor SorCS2               | 1        | AMYVNLTLTGEPPIR                      | Deamidated(5)Oxidation(2)                                                              | 4.25  | 2      | 797.9    |
| 755522163   | Integrin alpha-M                                         | 8        | IQCDLPSFNTQEIFNVTLK                  | Carbamidomethyl(3)Deamidated(15)                                                       | 3.97  | 3      | 756.7    |
| 13385482    | Tetraspanin-31                                           | 1        | SFDCCGFLNLTTLR                       | Carbamidomethyl(4)Carbamidometh<br>yl(5)Deamidated(9)                                  | 4.22  | 2      | 852.9    |
| 46849812    | Fibronectin                                              | 10       | DQCIVDDITYNVNDTFHKR                  | Carbamidomethyl(3)Carbamyl(18)De<br>amidated(13)                                       | 6.52  | 3      | 785.4    |
| 45504394    | Integrin beta-1                                          | 7        | NPCTSEQNCTSPFSYK                     | Carbamidomethyl(3)Carbamidometh<br>yl(9)Deamidated(8)                                  | 5.1   | 2      | 960.9    |
| 568958751   | Hypoxia up-regulated protein                             | 7        | ENGTDVAVQEEEESPAEGSK                 | Deamidated(2)                                                                          | 4.01  | 2      | 1003.9   |
| 597508192   | Macrosialin                                              | 1        | ELQAPLGQSFCCGNASIVLSPAVHL<br>DLLSLR  | Carbamidomethyl(11)Carbamidomet<br>hyl(12)Deamidated(14)                               | 6.41  | 4      | 842.4    |
| 568954797   | Teneurin-3                                               | 2        | LTNVTFPTGVVTLNLHGDMDK                | Deamidated(3)Oxidation(18)                                                             | 3.89  | 3      | 726.0    |
| 392871558   | Receptor-type tyrosine-protein<br>phosphatase C          | 3        | TSRPTDNSINVTGPPYETNGPK               | Carbamidomethyl(13)Deamidated(10<br>)Deamidated(20)                                    | 5.58  | 3      | 836.1    |
| 153791389   | Integrin alpha-1                                         | 13       | DSCESNQNITCR                         | Carbamidomethyl(3)Carbamidometh<br>yl(11)Deamidated(8)                                 | 2.87  | 2      | 742.8    |

14 Supplemental Table S2

| MH+ [Da] | RT [min] | PSM | WT-1     | WT-2     | WT-3     | WT-4     | WT-5     | WT-5-2   | WT-6     | WT-7     | WT-8     | Null-1   | Null-2   |
|----------|----------|-----|----------|----------|----------|----------|----------|----------|----------|----------|----------|----------|----------|
| 2625.3   | 43.9     | 103 | 2.88E+05 | 2.01E+05 | 9.69E+05 | 2.74E+05 | 9.17E+05 | 9.13E+05 | 1.37E+05 | 6.95E+05 | 1.42E+05 | 1.36E+05 | 5.88E+05 |
| 2443.0   | 39.0     | 10  | 6.14E+05 | 2.71E+05 | 3.69E+05 | 2.37E+05 | 1.22E+06 | 9.94E+05 | 2.02E+05 | 4.34E+05 | 1.41E+05 | 2.65E+05 | 2.56E+05 |
| 3402.5   | 53.3     | 17  | 5.69E+05 | 7.10E+05 | 7.80E+05 | 2.76E+05 | 6.42E+05 | 6.40E+05 | 1.01E+05 | 4.61E+05 | 2.37E+05 | 1.39E+05 | 3.49E+05 |
| 1408.6   | 34.8     | 18  | 6.57E+05 | 9.18E+05 | 1.16E+06 | 4.87E+05 | 1.06E+06 | 1.02E+06 | 5.26E+05 | 6.56E+05 | 5.71E+05 | 2.07E+05 | 4.93E+05 |
| 1459.6   | 21.4     | 23  | 1.43E+06 | 1.75E+06 | 1.39E+06 | 6.52E+03 | 1.26E+06 | 1.24E+06 | 1.12E+06 | 6.96E+05 | 4.37E+05 | 1.27E+05 | 3.95E+05 |
| 2902.3   | 49.5     | 15  | 1.92E+05 | 2.85E+05 | 3.44E+05 | 1.48E+05 | 4.63E+05 | 5.52E+05 | 1.52E+05 | 2.42E+05 | 1.50E+05 | 8.66E+04 | 2.28E+05 |
| 1808.9   | 67.8     | 27  | 1.52E+05 | 1.21E+05 | 1.97E+05 | 6.63E+04 | 1.80E+05 | 2.02E+05 | 3.57E+04 | 1.54E+05 | 4.88E+04 | 4.56E+04 | 8.87E+04 |
| 1799.8   | 23.7     | 34  | 7.31E+05 | 7.07E+05 | 8.33E+05 | 0.00E+00 | 1.69E+06 | 1.47E+06 | 5.00E+05 | 4.59E+05 | 2.03E+05 | 1.90E+05 | 3.88E+05 |
| 2374.1   | 36.9     | 11  | 6.86E+05 | 3.19E+05 | 8.63E+05 | 3.04E+05 | 1.22E+06 | 1.18E+06 | 2.54E+05 | 5.43E+05 | 1.05E+05 | 2.61E+05 | 3.75E+05 |
| 2657.3   | 66.3     | 3   | 4.56E+04 | 1.88E+05 | 1.60E+05 | 5.76E+04 | 1.40E+05 | 1.39E+05 | 9.15E+03 | 1.10E+05 | 7.48E+04 | 2.70E+04 | 5.85E+04 |
| 1556.7   | 25.4     | 28  | 7.03E+05 | 8.60E+05 | 8.21E+05 | 1.12E+04 | 1.14E+06 | 9.37E+05 | 7.82E+05 | 5.96E+05 | 3.61E+05 | 1.76E+05 | 3.86E+05 |
| 1327.7   | 29.8     | 17  | 1.56E+05 | 1.60E+05 | 2.13E+05 | 8.31E+04 | 2.84E+05 | 2.33E+05 | 8.15E+04 | 1.17E+05 | 5.94E+04 | 4.33E+04 | 1.08E+05 |
| 1632.9   | 30.8     | 7   | 8.04E+04 | 1.18E+05 | 1.26E+05 | 4.29E+04 | 1.51E+05 | 1.12E+05 | 4.63E+04 | 1.01E+05 | 3.11E+04 | 3.12E+04 | 4.08E+04 |
| 1999.9   | 32.5     | 29  | 1.77E+06 | 1.19E+06 | 4.91E+06 | 1.07E+06 | 5.56E+06 | 5.05E+06 | 1.66E+06 | 2.00E+06 | 9.80E+05 | 1.04E+06 | 1.17E+06 |
| 3819.8   | 34.5     | 4   | 1.64E+05 | 1.14E+05 | 2.24E+05 | 8.85E+04 | 3.10E+05 | 2.82E+05 | 4.08E+04 | 9.59E+04 | 4.59E+04 | 4.65E+04 | 4.73E+04 |
| 1594.8   | 46.1     | 15  | 2.47E+05 | 3.42E+05 | 3.91E+05 | 1.88E+05 | 2.79E+05 | 2.15E+05 | 5.34E+04 | 2.35E+05 | 1.16E+05 | 2.44E+04 | 1.75E+05 |
| 2268.1   | 60.9     | 7   | 6.84E+04 | 1.43E+05 | 2.16E+05 | 7.08E+04 | 1.19E+05 | 1.24E+05 | 1.24E+04 | 8.79E+04 | 4.55E+04 | 5.47E+03 | 7.26E+04 |
| 1704.8   | 58.2     | 15  | 7.82E+04 | 1.35E+05 | 2.29E+05 | 4.26E+04 | 2.81E+05 | 2.36E+05 | 4.65E+04 | 1.07E+05 | 4.94E+04 | 3.11E+04 | 1.29E+05 |
| 2354.1   | 45.1     | 21  | 7.58E+04 | 1.01E+05 | 1.12E+05 | 4.38E+04 | 1.54E+05 | 1.59E+05 | 2.22E+04 | 4.86E+04 | 1.62E+04 | 3.78E+04 | 5.21E+04 |
| 1920.8   | 31.9     | 20  | 4.04E+05 | 4.55E+05 | 6.16E+05 | 1.74E+05 | 8.94E+05 | 8.16E+05 | 4.86E+05 | 3.20E+05 | 1.94E+05 | 1.26E+05 | 4.02E+05 |
| 2006.8   | 22.6     | 10  | 3.77E+04 | 1.04E+05 | 5.95E+04 | 1.69E+03 | 1.13E+05 | 9.75E+04 | 1.38E+05 | 8.32E+04 | 4.67E+04 | 1.07E+04 | 3.65E+04 |
| 3366.7   | 64.9     | 26  | 9.57E+04 | 1.85E+05 | 3.54E+05 | 4.16E+04 | 1.77E+05 | 1.71E+05 | 6.79E+04 | 1.34E+05 | 1.10E+04 | 6.45E+03 | 4.25E+04 |
| 2176.1   | 43.1     | 3   | 8.41E+04 | 1.83E+05 | 1.47E+05 | 9.29E+03 | 2.91E+05 | 2.20E+05 | 9.21E+04 | 1.97E+05 | 7.72E+04 | 6.06E+04 | 8.68E+04 |
| 2506.2   | 30.5     | 39  | 2.68E+05 | 3.20E+05 | 3.77E+05 | 1.30E+05 | 2.74E+05 | 2.93E+05 | 1.72E+05 | 1.38E+05 | 9.89E+04 | 5.72E+04 | 1.42E+05 |
| 1484.6   | 19.1     | 1   | 1.90E+05 | 1.75E+05 | 1.83E+05 | 0.00E+00 | 4.03E+05 | 5.54E+03 | 2.54E+05 | 1.26E+05 | 4.46E+04 | 2.57E+04 | 5.74E+04 |

14 Supplemental Table S2



| Null-3   | Null-4   | Null-5   | Null-6   | Null-7   | Null-8   | Ratio<br>Null/WT | SD       | p value  | N Ratio | N SD     | N p value | Avg_WT   | Avg_Null |
|----------|----------|----------|----------|----------|----------|------------------|----------|----------|---------|----------|-----------|----------|----------|
| 7.91E+04 | 2.43E+05 | 1.44E+05 | 2.89E+05 | 3.74E+05 | 4.31E+05 | 0.57             | 7.48E-01 | 1.33E-01 | 0.73    | 8.73E-01 | 3.16E-01  | 2.80E+05 | 2.04E+05 |
| 1.94E+05 | 2.23E+05 | 1.75E+05 | 3.88E+05 | 3.96E+05 | 2.21E+05 | 0.53             | 5.71E-01 | 1.05E-01 | 0.73    | 6.19E-01 | 2.30E-01  | 2.70E+05 | 1.97E+05 |
| 1.56E+05 | 2.85E+05 | 1.91E+05 | 3.39E+05 | 4.33E+05 | 3.81E+05 | 0.58             | 5.03E-01 | 3.72E-02 | 0.73    | 5.11E-01 | 1.18E-01  | 2.83E+05 | 2.06E+05 |
| 4.26E+05 | 3.67E+05 | 3.13E+05 | 6.65E+05 | 5.74E+05 | 5.75E+05 | 0.58             | 3.84E-01 | 5.84E-03 | 0.73    | 3.79E-01 | 2.97E-02  | 4.56E+05 | 3.31E+05 |
| 3.64E+05 | 7.69E+05 | 4.99E+05 | 9.16E+05 | 8.49E+05 | 8.72E+05 | 0.58             | 5.88E-01 | 5.85E-02 | 0.73    | 6.58E-01 | 1.82E-01  | 5.95E+05 | 4.32E+05 |
| 1.05E+05 | 1.55E+05 | 1.09E+05 | 1.63E+05 | 2.02E+05 | 2.06E+05 | 0.56             | 4.79E-01 | 3.86E-02 | 0.72    | 4.61E-01 | 8.59E-02  | 1.59E+05 | 1.15E+05 |
| 3.57E+04 | 7.72E+04 | 3.81E+04 | 5.68E+04 | 7.83E+04 | 1.65E+05 | 0.57             | 6.10E-01 | 5.14E-02 | 0.72    | 6.56E-01 | 1.65E-01  | 7.33E+04 | 5.29E+04 |
| 3.26E+05 | 4.78E+05 | 2.85E+05 | 3.21E+05 | 4.25E+05 | 6.96E+05 | 0.53             | 6.06E-01 | 1.04E-01 | 0.72    | 6.53E-01 | 2.20E-01  | 3.97E+05 | 2.86E+05 |
| 2.31E+05 | 2.32E+05 | 2.48E+05 | 4.21E+05 | 4.05E+05 | 3.84E+05 | 0.53             | 4.90E-01 | 6.90E-02 | 0.72    | 5.03E-01 | 1.73E-01  | 3.29E+05 | 2.36E+05 |
| 8.25E+04 | 3.08E+04 | 4.92E+04 | 7.77E+04 | 6.53E+04 | 7.98E+04 | 0.57             | 5.42E-01 | 6.46E-02 | 0.72    | 6.72E-01 | 2.10E-01  | 6.08E+04 | 4.37E+04 |
| 2.37E+05 | 3.93E+05 | 3.33E+05 | 5.30E+05 | 4.82E+05 | 5.84E+05 | 0.57             | 4.78E-01 | 3.19E-02 | 0.72    | 4.56E-01 | 7.62E-02  | 3.96E+05 | 2.84E+05 |
| 7.02E+04 | 6.27E+04 | 6.57E+04 | 1.19E+05 | 1.11E+05 | 8.99E+04 | 0.54             | 4.48E-01 | 2.76E-02 | 0.72    | 4.17E-01 | 5.62E-02  | 8.57E+04 | 6.14E+04 |
| 4.57E+04 | 4.84E+04 | 3.31E+04 | 7.29E+04 | 5.44E+04 | 6.91E+04 | 0.55             | 4.28E-01 | 2.21E-02 | 0.72    | 4.50E-01 | 8.30E-02  | 5.10E+04 | 3.65E+04 |
| 9.42E+05 | 1.27E+06 | 1.20E+06 | 2.16E+06 | 2.17E+06 | 1.43E+06 | 0.53             | 5.53E-01 | 8.55E-02 | 0.72    | 5.58E-01 | 1.79E-01  | 1.46E+06 | 1.05E+06 |
| 6.25E+04 | 5.04E+04 | 6.73E+04 | 1.57E+05 | 1.71E+05 | 4.70E+04 | 0.54             | 6.94E-01 | 8.72E-02 | 0.72    | 7.36E-01 | 2.06E-01  | 8.23E+04 | 5.88E+04 |
| 1.02E+05 | 1.13E+05 | 9.21E+04 | 1.52E+05 | 1.81E+05 | 2.21E+05 | 0.58             | 5.34E-01 | 3.46E-02 | 0.71    | 5.78E-01 | 1.21E-01  | 1.33E+05 | 9.51E+04 |
| 4.26E+04 | 4.30E+04 | 4.10E+04 | 8.28E+04 | 7.55E+04 | 8.77E+04 | 0.57             | 6.34E-01 | 8.46E-02 | 0.71    | 6.90E-01 | 1.99E-01  | 5.63E+04 | 4.02E+04 |
| 3.70E+04 | 7.05E+04 | 4.95E+04 | 6.21E+04 | 1.05E+05 | 9.71E+04 | 0.54             | 6.34E-01 | 9.31E-02 | 0.71    | 6.77E-01 | 1.95E-01  | 7.38E+04 | 5.26E+04 |
| 6.64E+04 | 2.58E+04 | 2.16E+04 | 4.39E+04 | 4.56E+04 | 3.65E+04 | 0.51             | 5.08E-01 | 5.73E-02 | 0.71    | 6.91E-01 | 1.98E-01  | 4.42E+04 | 3.15E+04 |
| 1.57E+05 | 2.72E+05 | 2.03E+05 | 2.61E+05 | 3.42E+05 | 3.18E+05 | 0.54             | 4.74E-01 | 3.17E-02 | 0.71    | 4.60E-01 | 6.21E-02  | 2.68E+05 | 1.90E+05 |
| 1.94E+04 | 4.91E+04 | 4.06E+04 | 5.17E+04 | 6.06E+04 | 8.24E+04 | 0.58             | 6.28E-01 | 7.48E-02 | 0.71    | 6.70E-01 | 1.75E-01  | 4.44E+04 | 3.14E+04 |
| 3.50E+04 | 3.44E+04 | 7.38E+04 | 1.29E+05 | 1.52E+05 | 1.46E+05 | 0.56             | 8.35E-01 | 1.54E-01 | 0.71    | 9.52E-01 | 3.21E-01  | 7.61E+04 | 5.38E+04 |
| 6.51E+04 | 6.09E+04 | 6.14E+04 | 8.78E+04 | 1.18E+05 | 9.72E+04 | 0.55             | 4.80E-01 | 5.86E-02 | 0.70    | 4.72E-01 | 1.41E-01  | 8.39E+04 | 5.89E+04 |
| 7.98E+04 | 1.34E+05 | 8.52E+04 | 1.47E+05 | 1.59E+05 | 2.03E+05 | 0.55             | 4.41E-01 | 1.48E-02 | 0.70    | 4.37E-01 | 4.76E-02  | 1.30E+05 | 9.14E+04 |
| 4.81E+04 | 8.10E+04 | 7.95E+04 | 1.13E+05 | 1.16E+05 | 1.44E+05 | 0.54             | 7.14E-01 | 1.53E-01 | 0.70    | 7.47E-01 | 2.59E-01  | 8.52E+04 | 5.98E+04 |

14 Supplemental Table S2

| Accession # | Protein                                               | # of Pep | PEPTIDE                                          | Modification                                                          | XCorr | Charge | m/z [Da] |
|-------------|-------------------------------------------------------|----------|--------------------------------------------------|-----------------------------------------------------------------------|-------|--------|----------|
| 568972029   | C-type mannose receptor 2                             | 6        | KKPNATVEPIQPDR                                   | Deamidated(4)                                                         | 3.67  | 2      | 797.4    |
| 160333372   | Lumican                                               | 5        | KLHINYNNLTESVGPLPK                               | Deamidated(8)                                                         | 4.32  | 3      | 680.4    |
| 19527236    | Transmembrane emp24 domain-containing protein 4       | 1        | FTFTSHTPGDHQICLHSNSTR                            | Carbamidomethyl(14)Deamidated(18)                                     | 6.89  | 5      | 489.6    |
| 239915968   | Thrombospondin 3                                      | 1        | LGFLGNQSQGCVPAR                                  | Carbamidomethyl(11)Deamidated(6)                                      | 3.86  | 2      | 802.9    |
| 124494256   | Prolow-density lipoprotein receptor-related protein 1 | 22       | DGSCIGNSSR                                       | Carbamidomethyl(4)Deamidated(7)                                       | 2.78  | 2      | 527.2    |
| 568967343   | tetraspanin 8                                         | 1        | ILNETLYENAK                                      | Deamidated(3)                                                         | 3.36  | 2      | 654.8    |
| 6755106     | Procollagen-lysine,2-oxoglutarate 5-dioxygenase 1     | 1        | EQINISLDHR                                       | Deamidated(4)                                                         | 2.91  | 2      | 613.3    |
| 156231021   | Kininogen-1                                           | 2        | IANFSQSCTLYSGDDLVEALPKPCP<br>GCPR                | Carbamidomethyl(8)Carbamidomethyl(24)Carbamidomethyl(27)Deamidated(3) | 3.29  | 3      | 1085.2   |
| 254939534   | Peptidyl-prolyl cis-trans isomerase FKBP10            | 7        | NHTYNTYVGQGYIIPGMDQGLQGA<br>CIGER                | Carbamidomethyl(25)Deamidated(1)<br>Oxidation(17)                     | 5.48  | 3      | 1077.2   |
| 568960005   | Choline transporter-like protein 2                    | 3        | TCNPETFPLRNESLQCPTAR                             | Carbamidomethyl(2)Carbamidomethyl(16)Deamidated(11)                   | 3.91  | 3      | 798.0    |
| 124494256   | Prolow-density lipoprotein receptor-related protein 1 | 22       | DNTTCYEFK                                        | Carbamidomethyl(5)Deamidated(2)                                       | 2.65  | 2      | 589.7    |
| 568908031   | Prolargin                                             | 3        | INGTQICPNNLVAFHDFSSDLENVP<br>HLR                 | Carbamidomethyl(7)Deamidated(2)                                       | 8.51  | 4      | 802.9    |
| 568958751   | Hypoxia up-regulated protein                          | 7        | VFGSQNLTTVK                                      | Deamidated(6)                                                         | 2.9   | 2      | 597.8    |
| 172072617   | Peptidyl-prolyl cis-trans isomerase FKBP9             | 3        | YHYNGTFLDGTLDSSSHNR                              | Deamidated(4)                                                         | 7.96  | 3      | 749.0    |
| 170172530   | Immunoglobulin joining chain                          | 2        | ENISDPTSPLR                                      | Deamidated(2)                                                         | 3.33  | 2      | 615.3    |
| 19527206    | CD276 antigen                                         | 3        | VVLGANGTYSCLVR                                   | Carbamidomethyl(11)Deamidated(6)                                      | 3.94  | 2      | 755.4    |
| 568956035   | Cadherin-11                                           | 1        | FIFSLPPEIMHNPFTVR                                | Deamidated(14)Oxidation(10)                                           | 3.93  | 3      | 726.0    |
| 568936922   | P2X purinoceptor 4                                    | 4        | TSICDSANCTLGSSDTHSSGIGTG<br>R                    | Carbamidomethyl(4)Carbamidomethyl(10)Deamidated(9)                    | 5.46  | 3      | 886.4    |
| 46849812    | Fibronectin                                           | 10       | ITTTPTNGQQGTSLEEVVHADQSSC<br>TFENLNPGLEYNVSVYTVK | Carbamidomethyl(25)Deamidated(29)<br>Deamidated(37)                   | 6.83  | 3      | 1610.8   |
| 569001628   | Inactive tyrosine-protein kinase 7                    | 3        | DNVTGEEVR                                        | Deamidated(2)                                                         | 2.69  | 2      | 510.2    |
| 568955184   | Cytokine receptor-like factor 1                       | 2        | VVDDVSNQTSCR                                     | Carbamidomethyl(11)Deamidated(7)                                      | 3.42  | 2      | 690.8    |
| 568958751   | Hypoxia up-regulated protein                          | 7        | NATLAEQAK                                        | Deamidated(1)                                                         | 3.07  | 2      | 473.7    |
| 45504394    | Integrin beta-1                                       | 7        | DTCAQECSHFNLTk                                   | Carbamidomethyl(3)Carbamidomethyl(7)Deamidated(11)                    | 4.36  | 3      | 571.2    |
| 124494256   | Prolow-density lipoprotein receptor-related protein 1 | 22       | LNGTDPIVAADSKR                                   | Deamidated(2)                                                         | 4.61  | 3      | 486.6    |
| 153791389   | Integrin alpha-1                                      | 13       | YNHTGQVVIYK                                      | Deamidated(2)                                                         | 3.49  | 2      | 661.8    |

14 Supplemental Table S2

| MH+ [Da] | RT [min] | PSM | WT-1     | WT-2     | WT-3     | WT-4     | WT-5     | WT-5-2   | WT-6     | WT-7     | WT-8     | Null-1   | Null-2   |
|----------|----------|-----|----------|----------|----------|----------|----------|----------|----------|----------|----------|----------|----------|
| 1593.9   | 21.8     | 28  | 8.85E+05 | 7.86E+05 | 9.43E+05 | 6.93E+02 | 1.03E+06 | 9.74E+05 | 7.92E+05 | 5.47E+05 | 2.55E+05 | 1.41E+05 | 3.41E+05 |
| 2039.1   | 38.1     | 248 | 8.58E+04 | 1.03E+05 | 2.18E+05 | 1.26E+05 | 3.49E+05 | 2.93E+05 | 4.92E+04 | 2.30E+05 | 7.76E+04 | 9.43E+04 | 1.29E+05 |
| 2444.1   | 29.5     | 45  | 5.07E+05 | 4.36E+05 | 9.41E+05 | 1.53E+05 | 1.12E+06 | 9.95E+05 | 2.91E+05 | 4.20E+05 | 1.62E+05 | 1.61E+05 | 4.78E+05 |
| 1604.8   | 39.0     | 21  | 2.88E+05 | 3.99E+05 | 7.44E+05 | 2.55E+05 | 8.22E+05 | 8.28E+05 | 4.24E+05 | 4.96E+05 | 1.95E+05 | 1.71E+05 | 4.10E+05 |
| 1053.4   | 16.8     | 2   | 1.07E+05 | 9.39E+04 | 1.36E+05 | 0.00E+00 | 2.18E+05 | 1.17E+04 | 1.26E+05 | 8.29E+04 | 3.71E+04 | 1.66E+04 | 4.01E+04 |
| 1308.7   | 35.3     | 5   | 9.74E+04 | 1.01E+05 | 8.35E+04 | 4.73E+04 | 1.45E+05 | 1.28E+05 | 8.10E+04 | 9.24E+04 | 4.98E+04 | 2.52E+04 | 5.50E+04 |
| 1225.6   | 31.2     | 19  | 1.75E+05 | 3.54E+05 | 2.66E+05 | 1.59E+05 | 4.28E+05 | 4.03E+05 | 1.16E+05 | 1.58E+05 | 1.01E+05 | 5.84E+04 | 1.38E+05 |
| 3253.5   | 50.3     | 6   | 5.91E+04 | 9.29E+04 | 1.54E+05 | 1.20E+04 | 2.45E+05 | 2.19E+05 | 4.41E+04 | 6.25E+04 | 1.37E+04 | 2.84E+04 | 6.67E+04 |
| 3229.5   | 45.7     | 13  | 9.33E+04 | 2.15E+05 | 1.37E+05 | 4.20E+04 | 1.19E+05 | 8.71E+04 | 4.95E+04 | 4.99E+04 | 4.57E+04 | 1.29E+04 | 2.70E+04 |
| 2392.1   | 36.2     | 12  | 2.04E+05 | 2.93E+05 | 4.92E+05 | 8.37E+04 | 5.50E+05 | 4.79E+05 | 2.39E+05 | 1.99E+05 | 9.29E+04 | 6.56E+04 | 2.16E+05 |
| 1178.5   | 29.2     | 7   | 9.94E+04 | 1.43E+05 | 1.53E+05 | 5.35E+04 | 2.11E+05 | 2.02E+05 | 1.40E+05 | 1.10E+05 | 7.83E+04 | 3.54E+04 | 6.21E+04 |
| 3208.6   | 53.7     | 17  | 1.65E+05 | 1.50E+05 | 3.14E+05 | 1.20E+05 | 5.31E+05 | 5.29E+05 | 3.08E+04 | 1.86E+05 | 1.41E+05 | 1.09E+05 | 1.56E+05 |
| 1194.6   | 34.3     | 27  | 2.08E+06 | 3.67E+06 | 4.00E+06 | 2.24E+06 | 4.82E+06 | 4.45E+06 | 3.07E+06 | 2.54E+06 | 1.69E+06 | 7.32E+05 | 1.81E+06 |
| 2245.0   | 44.1     | 88  | 1.93E+06 | 3.50E+06 | 3.29E+06 | 1.68E+06 | 2.78E+06 | 2.58E+06 | 1.08E+06 | 1.56E+06 | 1.11E+06 | 3.93E+05 | 1.14E+06 |
| 1229.6   | 32.3     | 14  | 4.11E+05 | 1.91E+05 | 2.20E+05 | 1.57E+05 | 6.67E+05 | 6.74E+05 | 2.73E+05 | 2.51E+05 | 1.61E+05 | 1.35E+05 | 1.94E+05 |
| 1509.8   | 40.9     | 13  | 1.27E+05 | 1.78E+05 | 2.50E+05 | 7.06E+04 | 2.14E+05 | 1.56E+05 | 8.88E+04 | 1.04E+05 | 5.59E+04 | 3.50E+04 | 7.77E+04 |
| 2176.1   | 54.1     | 24  | 2.88E+05 | 4.81E+05 | 6.00E+05 | 1.39E+05 | 6.24E+05 | 6.20E+05 | 9.58E+04 | 4.86E+05 | 1.33E+05 | 8.18E+04 | 2.26E+05 |
| 2657.1   | 28.1     | 3   | 7.36E+04 | 8.90E+04 | 1.30E+05 | 2.81E+04 | 1.18E+05 | 1.20E+05 | 9.29E+04 | 5.39E+04 | 2.58E+04 | 1.59E+04 | 5.83E+04 |
| 4830.3   | 55.5     | 45  | 1.42E+06 | 3.71E+06 | 5.19E+06 | 2.17E+06 | 3.66E+06 | 3.54E+06 | 1.45E+05 | 1.63E+06 | 8.98E+05 | 4.99E+05 | 1.84E+06 |
| 1019.5   | 19.5     | 7   | 1.87E+05 | 1.94E+05 | 2.63E+05 | 7.74E+03 | 2.46E+05 | 2.18E+05 | 1.76E+05 | 2.01E+05 | 9.17E+04 | 3.41E+04 | 1.07E+05 |
| 1380.6   | 19.9     | 10  | 9.39E+04 | 1.08E+05 | 1.34E+05 | 0.00E+00 | 2.13E+05 | 1.72E+05 | 9.75E+04 | 7.29E+04 | 2.88E+04 | 1.95E+04 | 5.64E+04 |
| 946.5    | 20.4     | 3   | 6.37E+04 | 8.96E+04 | 1.17E+05 | 2.90E+01 | 1.37E+05 | 1.33E+05 | 9.71E+04 | 7.53E+04 | 3.37E+04 | 1.25E+04 | 4.42E+04 |
| 1711.7   | 28.1     | 23  | 2.78E+05 | 2.32E+05 | 5.75E+05 | 8.69E+04 | 6.78E+05 | 5.44E+05 | 3.53E+05 | 2.62E+05 | 1.01E+05 | 1.03E+05 | 2.64E+05 |
| 1457.8   | 27.7     | 6   | 2.09E+05 | 8.60E+04 | 7.11E+04 | 7.10E+04 | 1.73E+05 | 1.44E+05 | 5.08E+04 | 7.40E+04 | 4.55E+04 | 3.58E+04 | 3.62E+04 |
| 1322.7   | 26.2     | 7   | 1.33E+05 | 1.26E+05 | 1.96E+05 | 3.44E+04 | 2.25E+05 | 1.83E+05 | 1.22E+05 | 1.03E+05 | 5.73E+04 | 3.34E+04 | 6.58E+04 |

14 Supplemental Table S2

| Null-3   | Null-4   | Null-5   | Null-6   | Null-7   | Null-8   | Ratio<br>Null/WT | SD       | p value  | N Ratio | N SD     | N p value | Avg_WT   | Avg_Null |
|----------|----------|----------|----------|----------|----------|------------------|----------|----------|---------|----------|-----------|----------|----------|
| 2.70E+05 | 3.59E+05 | 2.75E+05 | 5.86E+05 | 5.64E+05 | 4.83E+05 | 0.55             | 5.05E-01 | 3.46E-02 | 0.70    | 5.02E-01 | 8.33E-02  | 3.90E+05 | 2.73E+05 |
| 6.22E+04 | 7.16E+04 | 5.24E+04 | 8.43E+04 | 1.18E+05 | 1.12E+05 | 0.53             | 4.93E-01 | 5.68E-02 | 0.70    | 5.59E-01 | 1.48E-01  | 9.61E+04 | 6.73E+04 |
| 1.81E+05 | 2.46E+05 | 2.46E+05 | 2.92E+05 | 3.75E+05 | 3.47E+05 | 0.52             | 5.32E-01 | 6.49E-02 | 0.70    | 5.58E-01 | 1.38E-01  | 3.05E+05 | 2.13E+05 |
| 1.25E+05 | 3.43E+05 | 1.54E+05 | 3.26E+05 | 3.22E+05 | 2.54E+05 | 0.53             | 4.74E-01 | 2.58E-02 | 0.70    | 5.12E-01 | 7.30E-02  | 2.77E+05 | 1.94E+05 |
| 3.25E+04 | 5.53E+04 | 2.96E+04 | 8.32E+04 | 7.17E+04 | 6.63E+04 | 0.55             | 6.72E-01 | 1.22E-01 | 0.70    | 6.89E-01 | 2.07E-01  | 5.09E+04 | 3.56E+04 |
| 3.30E+04 | 4.78E+04 | 4.07E+04 | 6.61E+04 | 6.62E+04 | 7.13E+04 | 0.55             | 3.77E-01 | 5.48E-03 | 0.70    | 3.33E-01 | 1.33E-02  | 5.28E+04 | 3.69E+04 |
| 9.31E+04 | 1.26E+05 | 1.12E+05 | 1.57E+05 | 1.30E+05 | 2.10E+05 | 0.53             | 4.67E-01 | 3.17E-02 | 0.70    | 4.63E-01 | 7.48E-02  | 1.34E+05 | 9.38E+04 |
| 4.57E+04 | 4.51E+04 | 2.76E+04 | 6.07E+04 | 3.18E+04 | 9.80E+04 | 0.50             | 6.73E-01 | 1.30E-01 | 0.70    | 7.74E-01 | 2.72E-01  | 5.32E+04 | 3.71E+04 |
| 2.14E+04 | 6.39E+04 | 3.72E+04 | 8.24E+04 | 1.03E+05 | 7.52E+04 | 0.57             | 7.00E-01 | 9.43E-02 | 0.70    | 7.98E-01 | 2.37E-01  | 5.38E+04 | 3.75E+04 |
| 1.15E+05 | 1.43E+05 | 1.03E+05 | 1.61E+05 | 1.72E+05 | 2.55E+05 | 0.53             | 5.24E-01 | 4.92E-02 | 0.70    | 5.30E-01 | 1.03E-01  | 1.61E+05 | 1.12E+05 |
| 5.05E+04 | 9.24E+04 | 5.06E+04 | 1.01E+05 | 9.69E+04 | 8.74E+04 | 0.54             | 4.09E-01 | 1.03E-02 | 0.70    | 3.92E-01 | 2.30E-02  | 7.57E+04 | 5.28E+04 |
| 6.85E+04 | 1.06E+05 | 8.99E+04 | 2.34E+05 | 1.72E+05 | 7.50E+04 | 0.52             | 6.27E-01 | 1.01E-01 | 0.70    | 6.68E-01 | 1.91E-01  | 1.34E+05 | 9.32E+04 |
| 1.15E+06 | 1.45E+06 | 1.53E+06 | 2.34E+06 | 2.24E+06 | 2.50E+06 | 0.54             | 3.86E-01 | 5.18E-03 | 0.69    | 3.30E-01 | 7.55E-03  | 1.80E+06 | 1.25E+06 |
| 8.70E+05 | 1.28E+06 | 9.82E+05 | 1.61E+06 | 1.44E+06 | 1.69E+06 | 0.54             | 4.24E-01 | 1.27E-02 | 0.69    | 4.46E-01 | 4.89E-02  | 1.24E+06 | 8.57E+05 |
| 9.21E+04 | 2.00E+05 | 1.36E+05 | 1.99E+05 | 7.25E+04 | 3.47E+05 | 0.51             | 5.74E-01 | 5.36E-02 | 0.69    | 6.02E-01 | 1.13E-01  | 1.85E+05 | 1.27E+05 |
| 4.95E+04 | 8.18E+04 | 4.16E+04 | 9.12E+04 | 1.13E+05 | 9.59E+04 | 0.53             | 4.57E-01 | 2.11E-02 | 0.68    | 4.49E-01 | 4.89E-02  | 7.79E+04 | 5.32E+04 |
| 1.40E+05 | 1.68E+05 | 1.57E+05 | 2.94E+05 | 3.34E+05 | 2.59E+05 | 0.54             | 5.32E-01 | 4.92E-02 | 0.68    | 5.54E-01 | 1.23E-01  | 2.19E+05 | 1.50E+05 |
| 1.72E+04 | 5.87E+04 | 2.90E+04 | 4.35E+04 | 4.54E+04 | 7.08E+04 | 0.52             | 4.98E-01 | 2.17E-02 | 0.68    | 5.37E-01 | 6.41E-02  | 4.51E+04 | 3.07E+04 |
| 1.39E+06 | 1.59E+06 | 7.21E+05 | 1.19E+06 | 1.36E+06 | 1.54E+06 | 0.51             | 5.16E-01 | 5.88E-02 | 0.68    | 6.28E-01 | 1.57E-01  | 1.38E+06 | 9.40E+05 |
| 5.28E+04 | 1.24E+05 | 7.58E+04 | 1.19E+05 | 1.29E+05 | 1.23E+05 | 0.54             | 4.53E-01 | 1.89E-02 | 0.68    | 4.86E-01 | 5.95E-02  | 1.02E+05 | 6.95E+04 |
| 5.18E+04 | 4.80E+04 | 4.06E+04 | 7.64E+04 | 4.59E+04 | 7.61E+04 | 0.51             | 5.10E-01 | 5.45E-02 | 0.68    | 5.42E-01 | 1.09E-01  | 5.62E+04 | 3.81E+04 |
| 2.45E+04 | 4.95E+04 | 4.43E+04 | 6.04E+04 | 5.72E+04 | 5.60E+04 | 0.53             | 4.91E-01 | 3.54E-02 | 0.68    | 5.11E-01 | 7.43E-02  | 4.68E+04 | 3.16E+04 |
| 8.61E+04 | 1.73E+05 | 1.22E+05 | 2.14E+05 | 1.86E+05 | 2.51E+05 | 0.51             | 5.01E-01 | 4.40E-02 | 0.68    | 5.13E-01 | 8.43E-02  | 1.89E+05 | 1.28E+05 |
| 4.36E+04 | 4.22E+04 | 4.29E+04 | 1.04E+05 | 6.91E+04 | 4.94E+04 | 0.51             | 5.17E-01 | 3.77E-02 | 0.67    | 5.53E-01 | 9.51E-02  | 5.77E+04 | 3.89E+04 |
| 6.02E+04 | 6.18E+04 | 6.76E+04 | 9.30E+04 | 9.63E+04 | 5.78E+04 | 0.51             | 3.98E-01 | 1.60E-02 | 0.67    | 3.83E-01 | 2.67E-02  | 7.36E+04 | 4.96E+04 |

14 Supplemental Table S2

| Accession # | Protein                                                   | # of Pep | PEPTIDE                              | Modification                                                         | XCorr | Charge | m/z [Da] |
|-------------|-----------------------------------------------------------|----------|--------------------------------------|----------------------------------------------------------------------|-------|--------|----------|
| 568908031   | Prolargin                                                 | 3        | NSFNISNLLV/LHLSHNK                   | Deamidated(1)Deamidated(4)                                           | 5.52  | 4      | 488.5    |
| 7242187     | Legumain                                                  | 2        | SHTNTSHVMQYGNK                       | Deamidated(4)Deamidated(13)Oxidation(9)                              | 2.83  | 2      | 811.3    |
| 6857783     | low affinity immunoglobulin gamma Fc region receptor II-  | 3        | ANHSHSGDYICK                         | Carbamidomethyl(11)Deamidated(2)                                     | 3.18  | 2      | 720.3    |
| 10946680    | Fibromodulin                                              | 3        | LSHNSLTNNGLATNTFNSSSLELD<br>LSYNQLQK | Deamidated(4)Deamidated(8)Deamidated(17)                             | 8.47  | 3      | 1213.6   |
| 124494256   | Pro-low-density lipoprotein receptor-related protein 1    | 22       | TCVSNCTASQFVCK                       | Carbamidomethyl(2)Carbamidomethyl(6)Carbamidomethyl(13)Deamidated(5) | 3.53  | 2      | 831.9    |
| 568915418   | Prolyl endopeptidase FAP                                  | 4        | SVNATDYGLSPDR                        | Deamidated(3)                                                        | 3.56  | 2      | 698.3    |
| 568938103   | Procollagen-lysine,2-oxoglutarate 5-dioxygenase 3         | 2        | EQYIHENYSR                           | Deamidated(7)                                                        | 2.67  | 2      | 670.3    |
| 357588455   | Extracellular sulfatase Sulf-2                            | 3        | HGSDYSTDYLTDLITNDSVSFFR              | Deamidated(16)                                                       | 6.19  | 3      | 885.4    |
| 226246610   | Alpha-mannosidase 2                                       | 3        | GSPGNASQGSIHHLHSPQLALQADP<br>R       | Deamidated(5)                                                        | 5.81  | 3      | 847.1    |
| 31543108    | Lysosome-associated membrane glycoprotein 2               | 4        | LNNSQIK                              | Deamidated(2)                                                        | 2.45  | 2      | 409.2    |
| 254588077   | Multimerin-1                                              | 3        | ISNLTILLEMEK                         | Deamidated(3)Oxidation(10)                                           | 3.9   | 2      | 710.9    |
| 85719301    | carcinoembryonic antigen-related cell adhesion molecule 1 | 4        | GNTTAIDKEIAR                         | Deamidated(2)                                                        | 2.72  | 2      | 645.3    |
| 755470160   | Complement C4-B                                           | 2        | ALNVTLSSMGR                          | Deamidated(3)Oxidation(9)                                            | 2.78  | 2      | 583.3    |
| 568942448   | Nuclear pore membrane glycoprotein 210                    | 3        | GATNNTCIIR                           | Carbamidomethyl(7)Deamidated(4)                                      | 2.44  | 2      | 560.8    |
| 568920740   | Mast cell carboxypeptidase A                              | 1        | NQNSTCIGTDLNR                        | Carbamidomethyl(6)Deamidated(3)                                      | 3.69  | 2      | 747.3    |
| 755522163   | Integrin alpha-M                                          | 8        | DKVTFINTTR                           | Deamidated(7)                                                        | 2.88  | 2      | 598.3    |
| 19525731    | GDP-fucose protein O-fucosyltransferase 2                 | 1        | SQHLNSTDAADK                         | Deamidated(5)                                                        | 3.79  | 2      | 644.3    |
| 111120329   | Collagen alpha-2(I) chain                                 | 1        | ASQNITYHCK                           | Carbamidomethyl(9)Deamidated(4)                                      | 2.57  | 2      | 611.8    |
| 9055226     | Platelet glycoprotein IX                                  | 1        | QLLLANNSLR                           | Deamidated(6)                                                        | 3.08  | 2      | 571.8    |
| 126723006   | lipoprotein lipase, partial                               | 1        | TPEDTAEDTCHLIPGLADSVSNCHF<br>NHSSK   | Carbamidomethyl(10)Carbamidomethyl(23)Deamidated(22)Deamidated(26)   | 7.58  | 5      | 668.9    |
| 153792543   | ATP-binding cassette sub-family A member 9                | 2        | SMNELDLNYSIDAVR                      | Deamidated(8)Oxidation(2)                                            | 4.47  | 2      | 878.9    |
| 568967005   | Receptor-type tyrosine-protein phosphatase beta           | 1        | SFPVYINGSTVPSPVK                     | Deamidated(7)                                                        | 4.28  | 2      | 846.9    |
| 254939534   | Peptidyl-prolyl cis-trans isomerase FKBP10                | 7        | YHYNGTFEDGK                          | Deamidated(4)                                                        | 2.98  | 2      | 687.8    |

| MH+ [Da] | RT [min] | PSM | WT-1     | WT-2     | WT-3     | WT-4     | WT-5     | WT-5-2   | WT-6     | WT-7     | WT-8     | Null-1   | Null-2   |
|----------|----------|-----|----------|----------|----------|----------|----------|----------|----------|----------|----------|----------|----------|
| 1951.0   | 49.7     | 19  | 3.45E+04 | 9.19E+04 | 1.95E+05 | 5.92E+04 | 8.80E+04 | 7.39E+04 | 2.59E+04 | 6.12E+04 | 1.01E+04 | 6.01E+03 | 3.48E+04 |
| 1621.7   | 16.2     | 16  | 2.02E+02 | 1.79E+05 | 6.32E+05 | 3.27E+04 | 3.14E+02 | 0.00E+00 | 2.89E+02 | 3.90E+05 | 2.04E+05 | 9.77E+04 | 2.73E+05 |
| 1439.6   | 16.7     | 1   | 0.00E+00 | 2.14E+04 | 4.46E+04 | 0.00E+00 | 6.35E+02 | 0.00E+00 | 1.53E+02 | 2.22E+04 | 1.16E+04 | 2.89E+03 | 4.86E+03 |
| 3638.8   | 58.2     | 55  | 5.42E+04 | 1.43E+05 | 4.90E+05 | 8.27E+04 | 3.13E+05 | 2.55E+05 | 3.52E+03 | 1.37E+05 | 1.97E+04 | 1.13E+04 | 1.64E+05 |
| 1662.7   | 30.8     | 6   | 7.31E+04 | 8.77E+04 | 1.26E+05 | 5.80E+04 | 1.59E+05 | 1.60E+05 | 1.32E+05 | 5.37E+04 | 7.56E+04 | 2.54E+04 | 5.38E+04 |
| 1395.6   | 32.3     | 17  | 1.85E+05 | 1.74E+05 | 4.30E+05 | 9.68E+04 | 2.37E+05 | 2.50E+05 | 1.40E+05 | 1.50E+05 | 9.80E+04 | 5.15E+04 | 1.06E+05 |
| 1339.6   | 22.6     | 14  | 2.66E+05 | 3.34E+05 | 3.32E+05 | 4.37E+02 | 5.74E+05 | 5.29E+05 | 3.41E+05 | 2.76E+05 | 1.08E+05 | 7.14E+04 | 1.30E+05 |
| 2654.2   | 64.8     | 17  | 8.54E+04 | 1.00E+05 | 2.72E+05 | 6.56E+04 | 2.85E+05 | 2.88E+05 | 1.80E+04 | 1.82E+05 | 8.61E+04 | 3.78E+04 | 8.44E+04 |
| 2539.3   | 34.1     | 15  | 2.04E+05 | 2.74E+05 | 3.59E+05 | 1.45E+05 | 3.78E+05 | 2.97E+05 | 1.32E+05 | 2.25E+05 | 9.92E+04 | 8.69E+04 | 1.13E+05 |
| 817.4    | 20.0     | 1   | 1.20E+06 | 1.97E+04 | 2.26E+04 | 0.00E+00 | 1.53E+06 | 1.90E+06 | 9.52E+05 | 9.62E+03 | 1.88E+04 | 3.49E+03 | 2.38E+04 |
| 1420.8   | 49.5     | 20  | 9.30E+04 | 4.58E+05 | 3.23E+05 | 1.50E+05 | 3.67E+05 | 3.23E+05 | 6.90E+04 | 2.60E+05 | 1.55E+05 | 6.89E+04 | 1.18E+05 |
| 1289.7   | 23.4     | 4   | 1.30E+05 | 9.37E+04 | 1.66E+05 | 0.00E+00 | 2.58E+05 | 1.94E+05 | 8.04E+04 | 8.23E+04 | 5.89E+04 | 4.89E+04 | 5.64E+04 |
| 1165.6   | 32.3     | 13  | 6.29E+05 | 3.23E+05 | 6.78E+05 | 8.23E+05 | 1.05E+06 | 1.44E+06 | 2.54E+05 | 5.10E+05 | 4.26E+05 | 3.00E+05 | 4.46E+05 |
| 1120.5   | 24.6     | 4   | 4.66E+04 | 3.83E+04 | 7.04E+04 | 7.69E+02 | 1.07E+05 | 7.55E+04 | 4.72E+04 | 4.75E+04 | 1.63E+04 | 1.48E+04 | 2.62E+04 |
| 1493.7   | 27.2     | 16  | 1.82E+05 | 6.16E+04 | 1.21E+05 | 6.62E+04 | 2.75E+05 | 1.94E+05 | 1.83E+05 | 3.56E+05 | 4.33E+04 | 4.46E+04 | 1.20E+05 |
| 1195.6   | 29.5     | 14  | 5.50E+05 | 8.02E+05 | 7.52E+05 | 4.10E+05 | 7.64E+05 | 6.36E+05 | 4.87E+05 | 4.12E+05 | 3.70E+05 | 1.39E+05 | 2.98E+05 |
| 1287.6   | 15.7     | 3   | 1.27E+05 | 1.04E+05 | 1.74E+05 | 0.00E+00 | 3.08E+05 | 2.14E+01 | 2.19E+05 | 1.28E+05 | 5.80E+04 | 2.11E+04 | 6.99E+04 |
| 1222.6   | 17.1     | 6   | 3.12E+05 | 2.23E+05 | 6.17E+05 | 3.31E+03 | 9.17E+05 | 2.61E+04 | 3.59E+05 | 2.21E+05 | 5.41E+04 | 1.33E+05 | 4.37E+04 |
| 1142.7   | 39.1     | 11  | 9.63E+04 | 3.30E+05 | 1.93E+05 | 8.03E+04 | 2.15E+05 | 2.01E+05 | 5.91E+04 | 1.29E+05 | 9.11E+04 | 4.66E+04 | 6.46E+04 |
| 3340.4   | 38.9     | 22  | 3.99E+04 | 4.57E+04 | 1.84E+05 | 3.72E+04 | 1.88E+05 | 1.14E+05 | 5.92E+04 | 4.16E+04 | 1.91E+04 | 3.17E+04 | 6.27E+04 |
| 1756.8   | 46.1     | 2   | 2.37E+05 | 2.32E+05 | 3.06E+05 | 1.23E+05 | 2.73E+05 | 2.28E+05 | 5.31E+04 | 2.10E+05 | 6.67E+04 | 5.25E+04 | 8.38E+04 |
| 1692.9   | 47.4     | 1   | 6.59E+04 | 1.32E+05 | 1.43E+05 | 4.42E+04 | 1.50E+05 | 1.72E+05 | 6.40E+04 | 9.86E+04 | 5.63E+04 | 3.32E+04 | 4.59E+04 |
| 1374.6   | 31.7     | 14  | 6.05E+05 | 1.11E+06 | 6.67E+05 | 6.81E+03 | 5.96E+05 | 4.80E+05 | 5.42E+05 | 3.18E+05 | 2.18E+05 | 4.68E+04 | 1.76E+05 |

14 Supplemental Table S2

| Null-3   | Null-4   | Null-5   | Null-6   | Null-7   | Null-8   | Ratio<br>Null/WT | SD       | p value  | N Ratio | N SD     | N p value | Avg_WT   | Avg_Null |
|----------|----------|----------|----------|----------|----------|------------------|----------|----------|---------|----------|-----------|----------|----------|
| 2.27E+04 | 2.37E+04 | 1.41E+04 | 6.84E+04 | 6.31E+04 | 6.96E+04 | 0.53             | 7.66E-01 | 1.26E-01 | 0.67    | 8.62E-01 | 2.52E-01  | 3.92E+04 | 2.63E+04 |
| 6.70E+04 | 1.50E+05 | 3.69E+03 | 0.00E+00 | 1.53E+05 | 3.38E+02 | 0.58             | 1.42E+00 | 4.31E-01 | 0.67    | 1.52E+00 | 5.10E-01  | 1.06E+05 | 7.09E+04 |
| 8.27E+03 | 1.57E+04 | 0.00E+00 | 0.00E+00 | 1.99E+04 | 0.00E+00 | 0.58             | 1.49E+00 | 4.37E-01 | 0.67    | 1.58E+00 | 5.14E-01  | 7.23E+03 | 4.84E+03 |
| 3.08E+04 | 1.56E+05 | 1.85E+04 | 3.23E+04 | 7.37E+04 | 1.78E+05 | 0.50             | 9.07E-01 | 1.83E-01 | 0.67    | 1.15E+00 | 3.65E-01  | 8.93E+04 | 5.97E+04 |
| 3.12E+04 | 5.41E+04 | 4.54E+04 | 7.57E+04 | 6.08E+04 | 8.25E+04 | 0.52             | 4.05E-01 | 8.74E-03 | 0.67    | 3.75E-01 | 1.53E-02  | 5.85E+04 | 3.90E+04 |
| 8.23E+04 | 9.94E+04 | 7.39E+04 | 1.24E+05 | 1.15E+05 | 1.45E+05 | 0.51             | 4.21E-01 | 2.45E-02 | 0.66    | 4.07E-01 | 4.83E-02  | 1.11E+05 | 7.32E+04 |
| 1.12E+05 | 1.72E+05 | 1.23E+05 | 2.31E+05 | 2.02E+05 | 1.99E+05 | 0.51             | 4.74E-01 | 3.77E-02 | 0.66    | 4.73E-01 | 6.79E-02  | 1.72E+05 | 1.13E+05 |
| 5.30E+04 | 5.80E+04 | 7.65E+04 | 1.10E+05 | 1.26E+05 | 8.19E+04 | 0.51             | 5.42E-01 | 6.90E-02 | 0.65    | 5.51E-01 | 1.25E-01  | 8.72E+04 | 5.71E+04 |
| 1.02E+05 | 8.25E+04 | 6.40E+04 | 1.55E+05 | 1.96E+05 | 1.53E+05 | 0.51             | 4.06E-01 | 8.98E-03 | 0.65    | 3.83E-01 | 1.77E-02  | 1.33E+05 | 8.70E+04 |
| 1.53E+04 | 8.89E+05 | 8.75E+04 | 8.33E+04 | 1.18E+06 | 6.79E+04 | 0.47             | 1.31E+00 | 2.92E-01 | 0.65    | 1.80E+00 | 5.28E-01  | 3.17E+05 | 2.07E+05 |
| 2.78E+05 | 4.28E+04 | 1.09E+05 | 1.44E+05 | 9.65E+04 | 1.02E+05 | 0.49             | 5.60E-01 | 3.15E-02 | 0.65    | 8.14E-01 | 1.70E-01  | 1.43E+05 | 9.30E+04 |
| 6.63E+04 | 4.32E+04 | 5.54E+04 | 7.96E+04 | 5.83E+04 | 3.54E+04 | 0.47             | 4.25E-01 | 4.30E-02 | 0.64    | 4.96E-01 | 7.20E-02  | 6.58E+04 | 4.22E+04 |
| 4.66E+05 | 1.90E+05 | 2.04E+05 | 3.53E+05 | 1.81E+05 | 4.08E+05 | 0.47             | 4.31E-01 | 2.13E-02 | 0.64    | 5.32E-01 | 5.12E-02  | 3.82E+05 | 2.44E+05 |
| 1.63E+04 | 2.57E+04 | 1.90E+04 | 2.74E+04 | 3.03E+04 | 3.19E+04 | 0.48             | 4.33E-01 | 4.02E-02 | 0.64    | 4.12E-01 | 6.18E-02  | 2.77E+04 | 1.76E+04 |
| 3.46E+04 | 9.68E+04 | 8.28E+04 | 6.43E+04 | 9.89E+04 | 1.19E+05 | 0.50             | 5.14E-01 | 4.98E-02 | 0.63    | 6.80E-01 | 1.89E-01  | 9.59E+04 | 6.06E+04 |
| 3.04E+05 | 2.39E+05 | 2.25E+05 | 3.87E+05 | 3.22E+05 | 3.59E+05 | 0.49             | 2.83E-01 | 6.04E-04 | 0.63    | 2.92E-01 | 2.12E-03  | 3.33E+05 | 2.10E+05 |
| 4.98E+04 | 5.86E+04 | 4.76E+04 | 1.02E+05 | 6.71E+04 | 7.04E+04 | 0.49             | 5.85E-01 | 9.97E-02 | 0.63    | 6.11E-01 | 1.45E-01  | 7.05E+04 | 4.45E+04 |
| 1.85E+05 | 1.38E+05 | 1.16E+05 | 1.20E+05 | 1.44E+05 | 1.96E+05 | 0.44             | 5.91E-01 | 1.32E-01 | 0.63    | 7.63E-01 | 2.31E-01  | 1.63E+05 | 1.03E+05 |
| 1.84E+05 | 3.63E+04 | 6.30E+04 | 7.98E+04 | 6.68E+04 | 4.04E+04 | 0.47             | 5.68E-01 | 2.93E-02 | 0.63    | 8.47E-01 | 1.69E-01  | 9.05E+04 | 5.70E+04 |
| 4.26E+04 | 1.97E+04 | 2.21E+04 | 2.72E+04 | 3.66E+04 | 4.41E+04 | 0.44             | 5.29E-01 | 7.39E-02 | 0.63    | 6.62E-01 | 1.50E-01  | 4.30E+04 | 2.70E+04 |
| 7.40E+04 | 7.19E+04 | 1.06E+05 | 1.23E+05 | 1.06E+05 | 1.24E+05 | 0.48             | 3.62E-01 | 1.07E-02 | 0.63    | 3.86E-01 | 3.17E-02  | 1.09E+05 | 6.85E+04 |
| 4.82E+04 | 5.89E+04 | 5.52E+04 | 2.80E+04 | 6.67E+04 | 5.42E+04 | 0.47             | 3.45E-01 | 9.00E-03 | 0.62    | 4.03E-01 | 2.20E-02  | 5.91E+04 | 3.68E+04 |
| 1.54E+05 | 3.20E+05 | 1.84E+05 | 3.74E+05 | 3.64E+05 | 4.15E+05 | 0.50             | 5.72E-01 | 5.03E-02 | 0.62    | 6.57E-01 | 1.25E-01  | 2.93E+05 | 1.82E+05 |

14 Supplemental Table S2

| Accession # | Protein                                                          | # of Pep | PEPTIDE                          | Modification                                                          | XCorr | Charge | m/z [Da] |
|-------------|------------------------------------------------------------------|----------|----------------------------------|-----------------------------------------------------------------------|-------|--------|----------|
| 45504394    | Integrin beta-1                                                  | 7        | LRNPCTSEQNCTSPFSYK               | Carbamidomethyl(5)Carbamidomethyl(11)Deamidated(10)                   | 6.51  | 3      | 730.7    |
| 124494256   | Prolow-density lipoprotein receptor-related protein 1            | 22       | LTSCATNASMCGDEAR                 | Carbamidomethyl(4)Carbamidomethyl(11)Deamidated(7)Oxidation(10)       | 2.68  | 2      | 880.8    |
| 6679166     | Mimecan                                                          | 1        | VIHLQFNSSILTDITFCKANDTR          | Carbamidomethyl(18)Deamidated(21)                                     | 6.21  | 4      | 696.6    |
| 145966911   | Transmembrane emp24 domain-containing protein 9                  | 1        | FTFTSHTPGEHQICLHSNSTK            | Carbamidomethyl(14)Deamidated(18)                                     | 7.72  | 4      | 608.3    |
| 154240724   | Ectonucleotide pyrophosphatase/phosphodiesterase family member 3 | 1        | LNLSEGEVAATVK                    | Deamidated(2)                                                         | 3.44  | 2      | 666.4    |
| 254939534   | Peptidyl-prolyl cis-trans isomerase FKBP10                       | 7        | YHYNCSLLDGTR                     | Carbamidomethyl(5)Deamidated(4)                                       | 3.42  | 2      | 750.3    |
| 545477648   | CD63 antigen                                                     | 1        | DRVPDSCCINITVGCGNDFK             | Carbamidomethyl(7)Carbamidomethyl(8)Carbamidomethyl(15)Deamidated(10) | 4.4   | 3      | 776.7    |
| 339895744   | Collagen alpha-3(VI) chain                                       | 5        | VAVVQQSTYESVDNASVPPVKVEFSLTDYGAK | Deamidated(14)                                                        | 4.01  | 3      | 1143.6   |
| 269315863   | Collagen alpha-5(VI)                                             | 7        | EQESMMNLTIHLVK                   | Deamidated(7)Oxidation(5)Oxidation(6)                                 | 3.41  | 2      | 853.4    |
| 124487415   | Latent-transforming growth factor beta-binding protein 3         | 1        | DSCQQGSNMTLIGENGHSTDTLTSRSGFR    | Carbamidomethyl(3)Deamidated(8)Deamidated(15)Oxidation(9)             | 5.65  | 3      | 996.8    |
| 124494256   | Prolow-density lipoprotein receptor-related protein 1            | 22       | GCKDNATDSVPLR                    | Carbamidomethyl(2)Deamidated(5)                                       | 3.94  | 3      | 478.6    |
| 357588455   | Extracellular sulfatase Sulf-2                                   | 3        | TFAVYLNSTGYR                     | Deamidated(7)                                                         | 2.66  | 2      | 696.8    |
| 568988705   | Transmembrane and TPR repeat-containing protein 4                | 1        | NLADQGNQTAAIK                    | Deamidated(7)                                                         | 2.48  | 2      | 672.8    |
| 755525407   | Fibrinogen-like protein 1                                        | 1        | IDLTDFEKNSSFAQYQSFK              | Deamidated(9)                                                         | 6.17  | 3      | 757.0    |
| 6677905     | Golgi apparatus protein 1                                        | 3        | DIVGNL TELESEDIQIEALLMR          | Deamidated(5)Oxidation(21)                                            | 3.15  | 3      | 840.1    |
| 228008326   | Probable carboxypeptidase X1                                     | 2        | SRNSTGMDIVFPANSDAETPVLNLLPEPQVAR | Deamidated(3)Oxidation(7)                                             | 3.76  | 3      | 1152.6   |
| 269315863   | Collagen alpha-5(VI)                                             | 7        | YQEIIIELESSLNK                   | Deamidated(12)                                                        | 3.51  | 2      | 783.9    |
| 568989825   | Lysyl oxidase-like protein 2                                     | 3        | DPVKNATCENGQPAVVSCVPSQIFSPDGPSR  | Carbamidomethyl(8)Carbamidomethyl(18)Deamidated(5)Deamidated(10)      | 5.54  | 3      | 1105.8   |
| 224967060   | Matrilin-4                                                       | 1        | SLDVGLNATR                       | Deamidated(7)                                                         | 2.61  | 2      | 523.8    |
| 228008326   | Probable carboxypeptidase X1                                     | 2        | QVNEQCPNITR                      | Carbamidomethyl(6)Deamidated(8)                                       | 2.85  | 2      | 680.3    |
| 124494256   | Prolow-density lipoprotein receptor-related protein 1            | 22       | QTGDVTCNCTDGR                    | Carbamidomethyl(7)Carbamidomethyl(9)Deamidated(8)                     | 3.33  | 2      | 742.8    |
| 568987063   | stabilin-1                                                       | 7        | GCADYCNQTITK                     | Carbamidomethyl(2)Carbamidomethyl(6)Deamidated(7)                     | 3.6   | 2      | 716.3    |

14 Supplemental Table S2



| MH+ [Da] | RT [min] | PSM | WT-1     | WT-2     | WT-3     | WT-4     | WT-5     | WT-5-2   | WT-6     | WT-7     | WT-8     | Null-1   | Null-2   |
|----------|----------|-----|----------|----------|----------|----------|----------|----------|----------|----------|----------|----------|----------|
| 2190.0   | 30.2     | 19  | 4.59E+05 | 3.78E+05 | 8.67E+05 | 1.36E+05 | 9.61E+05 | 7.72E+05 | 3.16E+05 | 2.88E+05 | 1.78E+05 | 1.30E+05 | 2.25E+05 |
| 1760.7   | 20.1     | 11  | 1.44E+05 | 1.34E+05 | 2.39E+05 | 0.00E+00 | 3.36E+05 | 2.70E+05 | 2.07E+05 | 9.79E+04 | 4.36E+04 | 2.47E+04 | 8.82E+04 |
| 2783.3   | 47.4     | 43  | 5.12E+05 | 5.00E+05 | 1.25E+06 | 4.09E+05 | 1.64E+06 | 1.61E+06 | 1.27E+05 | 8.19E+05 | 1.33E+05 | 1.39E+05 | 5.25E+05 |
| 2430.1   | 28.9     | 67  | 2.04E+06 | 2.07E+06 | 3.08E+06 | 7.71E+05 | 3.43E+06 | 2.99E+06 | 1.07E+06 | 1.49E+06 | 4.63E+05 | 4.66E+05 | 1.32E+06 |
| 1331.7   | 37.9     | 4   | 4.71E+05 | 5.83E+05 | 7.33E+05 | 2.70E+05 | 4.99E+05 | 5.16E+05 | 3.53E+05 | 4.82E+05 | 2.12E+05 | 1.05E+05 | 1.57E+05 |
| 1499.7   | 33.0     | 16  | 4.15E+05 | 6.86E+05 | 5.70E+05 | 1.53E+05 | 5.21E+05 | 5.30E+05 | 3.76E+05 | 2.20E+05 | 1.54E+05 | 3.20E+04 | 1.56E+05 |
| 2328.0   | 40.3     | 14  | 1.79E+05 | 2.27E+05 | 3.81E+05 | 6.14E+04 | 4.91E+05 | 4.82E+05 | 1.12E+05 | 1.90E+05 | 7.71E+04 | 4.39E+04 | 1.83E+05 |
| 3428.7   | 51.0     | 10  | 1.58E+05 | 5.81E+04 | 2.88E+05 | 1.75E+05 | 4.90E+05 | 4.40E+05 | 3.20E+03 | 1.35E+05 | 5.66E+04 | 5.78E+04 | 3.11E+04 |
| 1705.8   | 34.5     | 15  | 5.47E+05 | 1.06E+05 | 4.18E+05 | 2.10E+05 | 4.85E+05 | 5.17E+05 | 1.45E+05 | 3.71E+05 | 9.07E+04 | 1.19E+05 | 3.36E+05 |
| 2988.3   | 38.5     | 14  | 1.77E+05 | 2.36E+05 | 3.65E+05 | 7.81E+04 | 3.71E+05 | 3.80E+05 | 1.47E+05 | 1.70E+05 | 5.15E+04 | 7.87E+04 | 1.32E+05 |
| 1433.7   | 23.8     | 12  | 1.34E+05 | 8.74E+04 | 1.91E+05 | 2.13E+03 | 2.74E+05 | 2.50E+05 | 1.81E+05 | 1.12E+05 | 4.62E+04 | 2.80E+04 | 7.22E+04 |
| 1392.7   | 43.3     | 4   | 6.11E+04 | 5.28E+04 | 1.64E+05 | 4.40E+04 | 2.24E+05 | 2.40E+05 | 2.25E+04 | 1.29E+05 | 5.78E+04 | 2.54E+04 | 9.54E+04 |
| 1344.7   | 24.1     | 3   | 9.86E+04 | 1.17E+05 | 1.21E+05 | 7.21E+04 | 1.84E+05 | 1.64E+05 | 8.46E+04 | 1.18E+05 | 3.81E+04 | 3.23E+04 | 5.71E+04 |
| 2269.1   | 51.7     | 14  | 2.99E+05 | 8.73E+05 | 7.91E+05 | 7.88E+05 | 6.38E+05 | 6.89E+05 | 1.94E+05 | 5.68E+05 | 3.68E+05 | 2.49E+05 | 2.66E+05 |
| 2518.3   | 78.8     | 7   | 1.12E+04 | 7.58E+04 | 2.09E+05 | 1.04E+04 | 5.24E+04 | 1.35E+03 | 4.43E+03 | 5.42E+02 | 1.72E+04 | 1.07E+04 | 4.67E+04 |
| 3455.7   | 57.3     | 10  | 8.90E+04 | 1.02E+05 | 2.25E+05 | 8.20E+04 | 1.91E+05 | 1.68E+05 | 3.95E+04 | 1.35E+05 | 6.93E+04 | 3.44E+04 | 5.62E+04 |
| 1566.8   | 46.9     | 3   | 1.85E+05 | 5.52E+04 | 1.44E+05 | 7.81E+04 | 1.82E+05 | 1.75E+05 | 3.55E+04 | 1.37E+05 | 2.79E+04 | 3.75E+04 | 5.65E+04 |
| 3315.5   | 47.3     | 8   | 1.91E+05 | 3.97E+05 | 4.77E+05 | 1.65E+05 | 4.46E+05 | 4.87E+05 | 1.06E+05 | 1.34E+05 | 9.24E+04 | 8.08E+04 | 1.67E+05 |
| 1046.5   | 34.1     | 2   | 1.50E+05 | 1.48E+05 | 3.13E+05 | 1.39E+05 | 4.20E+05 | 3.64E+05 | 9.84E+04 | 2.20E+05 | 6.57E+04 | 6.48E+04 | 1.21E+05 |
| 1359.6   | 22.8     | 1   | 2.65E+04 | 3.37E+04 | 8.26E+04 | 1.55E+05 | 1.18E+05 | 8.78E+04 | 5.28E+04 | 6.63E+04 | 2.58E+04 | 2.10E+04 | 3.01E+04 |
| 1484.6   | 18.0     | 9   | 6.18E+04 | 0.00E+00 | 3.61E+03 | 0.00E+00 | 1.76E+05 | 2.35E+05 | 1.04E+05 | 2.03E+03 | 0.00E+00 | 0.00E+00 | 4.68E+04 |
| 1431.6   | 23.6     | 3   | 5.58E+04 | 4.61E+04 | 7.32E+04 | 0.00E+00 | 1.10E+05 | 1.15E+05 | 7.98E+04 | 3.63E+04 | 1.67E+04 | 1.58E+04 | 3.15E+04 |

14 Supplemental Table S2

| Null-3   | Null-4   | Null-5   | Null-6   | Null-7   | Null-8   | Ratio<br>Null/WT | SD       | p value  | N Ratio | N SD     | N p value | Avg_WT   | Avg_Null |
|----------|----------|----------|----------|----------|----------|------------------|----------|----------|---------|----------|-----------|----------|----------|
| 1.46E+05 | 2.35E+05 | 2.05E+05 | 2.38E+05 | 3.87E+05 | 2.19E+05 | 0.46             | 4.52E-01 | 3.53E-02 | 0.62    | 4.44E-01 | 4.97E-02  | 2.65E+05 | 1.64E+05 |
| 4.29E+04 | 1.01E+05 | 5.09E+04 | 9.65E+04 | 9.09E+04 | 1.05E+05 | 0.46             | 4.94E-01 | 4.35E-02 | 0.61    | 5.35E-01 | 6.90E-02  | 8.88E+04 | 5.45E+04 |
| 1.58E+05 | 3.89E+05 | 1.50E+05 | 5.28E+05 | 5.21E+05 | 4.72E+05 | 0.46             | 5.84E-01 | 7.22E-02 | 0.61    | 6.55E-01 | 1.30E-01  | 4.21E+05 | 2.58E+05 |
| 5.27E+05 | 8.07E+05 | 6.65E+05 | 1.02E+06 | 9.85E+05 | 1.32E+06 | 0.46             | 4.26E-01 | 1.98E-02 | 0.61    | 4.36E-01 | 3.32E-02  | 1.06E+06 | 6.49E+05 |
| 1.17E+05 | 1.38E+05 | 1.59E+05 | 3.01E+05 | 5.23E+05 | 3.17E+05 | 0.50             | 4.88E-01 | 6.90E-03 | 0.61    | 4.94E-01 | 2.00E-02  | 2.65E+05 | 1.61E+05 |
| 9.74E+04 | 2.68E+05 | 1.49E+05 | 2.00E+05 | 2.77E+05 | 3.57E+05 | 0.48             | 4.90E-01 | 1.43E-02 | 0.60    | 5.53E-01 | 4.32E-02  | 2.27E+05 | 1.38E+05 |
| 5.90E+04 | 1.36E+05 | 7.25E+04 | 8.76E+04 | 1.42E+05 | 1.68E+05 | 0.46             | 5.25E-01 | 4.70E-02 | 0.60    | 5.72E-01 | 7.35E-02  | 1.34E+05 | 8.10E+04 |
| 6.83E+04 | 3.02E+04 | 2.99E+04 | 2.67E+05 | 1.92E+05 | 4.66E+04 | 0.45             | 8.30E-01 | 1.17E-01 | 0.60    | 9.59E-01 | 2.10E-01  | 1.06E+05 | 6.42E+04 |
| 5.06E+04 | 1.13E+05 | 6.52E+04 | 6.43E+04 | 1.09E+05 | 3.30E+05 | 0.46             | 6.29E-01 | 3.55E-02 | 0.60    | 7.46E-01 | 1.07E-01  | 1.79E+05 | 1.08E+05 |
| 7.41E+04 | 1.16E+05 | 5.63E+04 | 7.61E+04 | 1.35E+05 | 1.11E+05 | 0.44             | 3.91E-01 | 2.05E-02 | 0.60    | 4.33E-01 | 3.72E-02  | 1.21E+05 | 7.26E+04 |
| 3.84E+04 | 6.86E+04 | 4.37E+04 | 7.28E+04 | 6.47E+04 | 1.24E+05 | 0.45             | 4.97E-01 | 3.53E-02 | 0.59    | 5.09E-01 | 4.92E-02  | 7.81E+04 | 4.64E+04 |
| 2.98E+04 | 3.47E+04 | 5.46E+04 | 5.42E+04 | 5.87E+04 | 4.66E+04 | 0.45             | 5.35E-01 | 6.05E-02 | 0.59    | 6.03E-01 | 9.76E-02  | 6.22E+04 | 3.67E+04 |
| 3.45E+04 | 4.46E+04 | 3.94E+04 | 6.42E+04 | 7.74E+04 | 4.76E+04 | 0.45             | 3.21E-01 | 3.12E-03 | 0.58    | 2.94E-01 | 4.12E-03  | 6.25E+04 | 3.65E+04 |
| 3.14E+05 | 1.84E+05 | 2.05E+05 | 3.11E+05 | 3.39E+05 | 1.96E+05 | 0.45             | 2.88E-01 | 3.69E-03 | 0.58    | 3.78E-01 | 1.43E-02  | 3.37E+05 | 1.96E+05 |
| 1.53E+04 | 2.06E+04 | 2.07E+04 | 0.00E+00 | 4.58E+02 | 2.72E+04 | 0.42             | 1.02E+00 | 3.12E-01 | 0.58    | 1.33E+00 | 4.42E-01  | 2.34E+04 | 1.35E+04 |
| 5.91E+04 | 5.54E+04 | 3.00E+04 | 8.29E+04 | 7.25E+04 | 4.45E+04 | 0.44             | 3.71E-01 | 1.07E-02 | 0.58    | 4.08E-01 | 1.98E-02  | 7.01E+04 | 4.04E+04 |
| 2.50E+04 | 6.04E+04 | 3.43E+04 | 3.61E+04 | 5.45E+04 | 8.91E+04 | 0.43             | 4.26E-01 | 1.81E-02 | 0.57    | 4.90E-01 | 4.52E-02  | 6.33E+04 | 3.62E+04 |
| 1.66E+05 | 1.25E+05 | 5.82E+04 | 8.94E+04 | 8.01E+04 | 1.48E+05 | 0.41             | 4.06E-01 | 2.10E-02 | 0.57    | 5.30E-01 | 4.59E-02  | 1.53E+05 | 8.70E+04 |
| 3.50E+04 | 1.51E+05 | 3.59E+04 | 8.42E+04 | 1.18E+05 | 1.11E+05 | 0.42             | 4.46E-01 | 1.92E-02 | 0.56    | 5.18E-01 | 3.07E-02  | 1.18E+05 | 6.63E+04 |
| 2.30E+04 | 2.72E+04 | 3.03E+04 | 4.22E+04 | 3.42E+04 | 2.88E+04 | 0.41             | 3.42E-01 | 2.00E-02 | 0.56    | 3.51E-01 | 2.67E-02  | 3.95E+04 | 2.21E+04 |
| 5.94E+03 | 2.22E+03 | 3.21E+04 | 3.09E+04 | 4.23E+04 | 4.46E+04 | 0.40             | 8.50E-01 | 2.31E-01 | 0.55    | 1.16E+00 | 3.66E-01  | 3.21E+04 | 1.78E+04 |
| 2.08E+04 | 2.10E+04 | 1.88E+04 | 2.40E+04 | 2.75E+04 | 3.33E+04 | 0.41             | 3.75E-01 | 2.82E-02 | 0.55    | 3.80E-01 | 3.62E-02  | 3.23E+04 | 1.79E+04 |

14 Supplemental Table S2

| Accession # | Protein                                                  | # of Pep | PEPTIDE                                 | Modification                                                         | XCorr | Charge | m/z [Da] |
|-------------|----------------------------------------------------------|----------|-----------------------------------------|----------------------------------------------------------------------|-------|--------|----------|
| 124494256   | Prolow-density lipoprotein receptor-related protein 1    | 22       | FGTCSQLCNNTK                            | Carbamidomethyl(4)Carbamidomethyl(8)Deamidated(9)                    | 4.01  | 2      | 715.8    |
| 568988013   | Olfactomedin-4                                           | 1        | INLTTNVVDVNRPLPLAAYNNR                  | Deamidated(2)                                                        | 3.57  | 3      | 823.4    |
| 115511022   | Vwf protein                                              | 1        | VPLHCTNGSVVYHEVINAMQCR                  | Carbamidomethyl(5)Carbamidomethyl(21)Deamidated(7)Oxidation(19)      | 4.99  | 4      | 651.1    |
| 568972025   | Myeloperoxidase                                          | 1        | ALMPFDSLHDDPCLLTNR                      | Carbamidomethyl(13)Deamidated(17)Oxidation(3)                        | 4.57  | 3      | 711.3    |
| 568975598   | Complement C1q tumor necrosis factor-related protein 2   | 1        | ILMNEGGHYNASSGK                         | Deamidated(10)Oxidation(3)                                           | 3.94  | 2      | 797.9    |
| 224967062   | Macrophage mannose receptor 1                            | 1        | TSYCNESFYFLCK                           | Carbamidomethyl(4)Carbamidomethyl(12)Deamidated(5)                   | 3.27  | 2      | 860.4    |
| 568926396   | Tenascin                                                 | 12       | TPMLSTDVSTAREPEIGNLVSDVTPK              | Deamidated(20)Oxidation(3)                                           | 7.69  | 3      | 963.5    |
| 568989825   | Lysyl oxidase-like protein 2                             | 3        | FSMNCTGTEAHISSCK                        | Carbamidomethyl(5)Carbamidomethyl(15)Deamidated(4)Oxidation(3)       | 4.81  | 3      | 616.3    |
| 12963767    | KDEL motif-containing protein 1                          | 1        | EMNCSETISQIQK                           | Carbamidomethyl(4)Deamidated(3)Oxidation(2)                          | 2.92  | 2      | 792.8    |
| 165905611   | latent transforming growth factor beta binding protein 4 | 2        | VNGSCVDVDECATGGR                        | Carbamidomethyl(5)Carbamidomethyl(11)Deamidated(2)                   | 2.72  | 2      | 848.8    |
| 225543173   | Cartilage-associated protein                             | 2        | NCSAATPAPAPAGPASHAELR                   | Carbamidomethyl(2)Deamidated(1)                                      | 5     | 3      | 683.0    |
| 568979644   | Fibulin-5                                                | 1        | NHTCTSLQTCYNLQGGFK                      | Carbamidomethyl(4)Carbamidomethyl(10)Deamidated(1)                   | 3.6   | 3      | 710.7    |
| 269315863   | Collagen alpha-5(VI)                                     | 7        | RFNETR                                  | Deamidated(3)                                                        | 2.41  | 2      | 412.2    |
| 85861262    | Netrin receptor UNC5B                                    | 1        | LSDTANYTCVAK                            | Carbamidomethyl(9)Deamidated(6)                                      | 2.81  | 2      | 672.3    |
| 568923623   | Translocon-associated protein subunit beta               | 2        | IAPASNVSHTVVLRPLK                       | Deamidated(6)                                                        | 4.92  | 2      | 902.0    |
| 46849812    | Fibronectin                                              | 10       | VFAVHQGRESNPLTAQQTTKLDAP<br>TNLQFVNETDR | Deamidated(31)                                                       | 7.94  | 4      | 982.5    |
| 45504394    | Integrin beta-1                                          | 7        | KDTCAQECSHFNLTK                         | Carbamidomethyl(4)Carbamidomethyl(8)Deamidated(12)                   | 5.9   | 3      | 613.9    |
| 568926396   | Tenascin                                                 | 12       | GPNCSEPDPCGNCNLR                        | Carbamidomethyl(4)Carbamidomethyl(9)Carbamidomethyl(13)Deamidated(3) | 4.01  | 2      | 924.4    |
| 755522163   | Integrin alpha-M                                         | 8        | TPVLNCSVAVCK                            | Carbamidomethyl(6)Carbamidomethyl(11)Deamidated(5)                   | 3.61  | 2      | 674.8    |
| 269315863   | Collagen alpha-5(VI)                                     | 7        | SNDSVLEPANR                             | Deamidated(2)                                                        | 3.11  | 2      | 601.8    |
| 166064058   | Slit homolog 2 protein                                   | 2        | DLEVLTLNNNNITR                          | Deamidated(11)                                                       | 3.42  | 2      | 815.4    |

| MH+ [Da] | RT [min] | PSM | WT-1     | WT-2     | WT-3     | WT-4     | WT-5     | WT-5-2   | WT-6     | WT-7     | WT-8     | Null-1   | Null-2   |
|----------|----------|-----|----------|----------|----------|----------|----------|----------|----------|----------|----------|----------|----------|
| 1430.6   | 25.4     | 15  | 2.27E+05 | 2.09E+05 | 2.99E+05 | 2.25E+03 | 4.66E+05 | 4.08E+05 | 2.64E+05 | 1.60E+05 | 7.31E+04 | 4.41E+04 | 1.11E+05 |
| 2468.3   | 48.4     | 2   | 1.98E+04 | 9.27E+04 | 8.52E+04 | 1.66E+05 | 8.69E+04 | 5.11E+04 | 1.27E+04 | 1.24E+05 | 1.46E+05 | 2.75E+04 | 6.48E+04 |
| 2601.2   | 35.4     | 6   | 4.92E+04 | 1.25E+05 | 1.26E+05 | 2.34E+04 | 1.97E+05 | 1.52E+05 | 4.87E+04 | 6.73E+04 | 3.59E+04 | 1.55E+04 | 4.73E+04 |
| 2132.0   | 46.0     | 16  | 1.61E+05 | 3.67E+05 | 3.93E+05 | 4.68E+05 | 4.78E+05 | 5.85E+05 | 1.20E+05 | 4.56E+05 | 7.55E+05 | 1.86E+05 | 2.51E+05 |
| 1594.7   | 20.3     | 4   | 4.48E+04 | 1.94E+04 | 3.40E+04 | 0.00E+00 | 6.44E+04 | 4.19E+04 | 3.40E+04 | 2.71E+04 | 7.85E+03 | 6.76E+03 | 1.27E+04 |
| 1719.7   | 47.9     | 11  | 2.44E+05 | 1.84E+05 | 2.70E+05 | 9.70E+04 | 2.93E+05 | 2.75E+05 | 1.72E+05 | 1.28E+05 | 8.70E+04 | 3.70E+04 | 9.53E+04 |
| 2888.4   | 43.9     | 18  | 6.59E+05 | 3.15E+05 | 1.25E+06 | 6.95E+05 | 1.01E+06 | 9.95E+05 | 5.66E+04 | 4.65E+05 | 2.25E+05 | 4.03E+05 | 1.29E+05 |
| 1846.7   | 22.3     | 8   | 1.02E+05 | 1.39E+05 | 1.90E+05 | 0.00E+00 | 2.70E+05 | 2.66E+05 | 9.87E+04 | 6.93E+04 | 2.47E+04 | 2.33E+04 | 5.50E+04 |
| 1584.7   | 26.7     | 9   | 7.07E+04 | 9.30E+04 | 1.45E+05 | 5.28E+04 | 1.97E+05 | 1.75E+05 | 1.26E+05 | 8.12E+04 | 3.75E+04 | 1.76E+04 | 5.05E+04 |
| 1696.7   | 26.2     | 13  | 9.06E+04 | 8.91E+04 | 1.45E+05 | 2.24E+04 | 2.23E+05 | 1.88E+05 | 9.10E+04 | 6.71E+04 | 1.93E+04 | 3.05E+04 | 4.51E+04 |
| 2047.0   | 27.0     | 3   | 5.25E+04 | 6.34E+04 | 1.01E+05 | 2.94E+04 | 1.55E+05 | 1.24E+05 | 5.27E+04 | 6.07E+04 | 1.64E+04 | 1.27E+04 | 3.05E+04 |
| 2129.9   | 36.3     | 8   | 5.46E+04 | 8.25E+04 | 1.26E+05 | 2.15E+04 | 1.52E+05 | 1.68E+05 | 5.54E+04 | 6.35E+04 | 7.44E+03 | 1.71E+04 | 5.00E+04 |
| 823.4    | 16.1     | 1   | 1.49E+05 | 4.22E+04 | 8.50E+04 | 1.16E+02 | 1.76E+05 | 2.40E+02 | 6.58E+04 | 9.51E+04 | 1.40E+04 | 1.64E+04 | 3.08E+04 |
| 1343.6   | 27.8     | 11  | 1.14E+05 | 1.05E+05 | 1.06E+05 | 2.70E+05 | 1.39E+05 | 4.04E+05 | 1.00E+05 | 9.14E+04 | 4.86E+04 | 4.19E+04 | 6.51E+04 |
| 1803.0   | 33.0     | 110 | 1.08E+05 | 1.65E+05 | 2.15E+05 | 6.16E+04 | 3.20E+05 | 2.57E+05 | 1.20E+05 | 1.40E+05 | 5.58E+04 | 5.26E+04 | 5.62E+04 |
| 3927.0   | 40.0     | 7   | 1.23E+05 | 2.08E+05 | 3.10E+05 | 1.12E+05 | 3.04E+05 | 3.56E+05 | 5.99E+04 | 1.66E+05 | 6.02E+04 | 3.79E+04 | 7.96E+04 |
| 1839.8   | 23.5     | 18  | 4.08E+05 | 3.31E+05 | 7.69E+05 | 1.07E+03 | 1.02E+06 | 9.65E+05 | 6.00E+05 | 3.05E+05 | 1.04E+05 | 7.70E+04 | 2.95E+05 |
| 1847.7   | 23.5     | 27  | 2.08E+05 | 1.66E+05 | 4.96E+05 | 0.00E+00 | 7.48E+05 | 7.71E+05 | 2.13E+05 | 2.46E+05 | 4.82E+04 | 7.30E+04 | 1.95E+05 |
| 1348.7   | 32.7     | 3   | 1.50E+05 | 2.56E+05 | 2.79E+05 | 5.35E+04 | 2.59E+05 | 2.65E+05 | 1.88E+05 | 1.23E+05 | 6.88E+04 | 2.65E+04 | 1.01E+05 |
| 1202.6   | 26.2     | 6   | 2.99E+05 | 4.26E+04 | 1.60E+05 | 5.46E+04 | 2.28E+05 | 1.96E+05 | 9.18E+04 | 1.31E+05 | 2.51E+04 | 3.96E+04 | 4.93E+04 |
| 1629.8   | 49.0     | 3   | 1.51E+05 | 2.34E+05 | 1.71E+05 | 1.18E+05 | 1.92E+05 | 2.26E+05 | 6.33E+04 | 1.66E+05 | 3.49E+04 | 4.41E+04 | 4.29E+04 |

14 Supplemental Table S2

| Null-3   | Null-4   | Null-5   | Null-6   | Null-7   | Null-8   | Ratio<br>Null/WT | SD       | p value  | N Ratio | N SD     | N p value | Avg_WT   | Avg_Null |
|----------|----------|----------|----------|----------|----------|------------------|----------|----------|---------|----------|-----------|----------|----------|
| 6.04E+04 | 1.15E+05 | 6.76E+04 | 1.05E+05 | 1.19E+05 | 1.59E+05 | 0.42             | 4.24E-01 | 2.50E-02 | 0.55    | 4.28E-01 | 2.72E-02  | 1.29E+05 | 7.10E+04 |
| 9.60E+04 | 1.56E+04 | 1.74E+04 | 4.89E+04 | 2.39E+04 | 2.01E+04 | 0.45             | 6.03E-01 | 3.57E-02 | 0.55    | 8.87E-01 | 1.67E-01  | 5.61E+04 | 3.07E+04 |
| 4.54E+04 | 4.21E+04 | 2.79E+04 | 2.80E+04 | 4.68E+04 | 4.44E+04 | 0.41             | 3.96E-01 | 2.71E-02 | 0.55    | 4.59E-01 | 3.53E-02  | 5.08E+04 | 2.78E+04 |
| 3.71E+05 | 1.15E+05 | 1.52E+05 | 1.78E+05 | 1.04E+05 | 1.11E+05 | 0.44             | 4.19E-01 | 7.19E-03 | 0.54    | 7.29E-01 | 1.22E-01  | 2.69E+05 | 1.45E+05 |
| 7.76E+03 | 1.50E+04 | 1.10E+04 | 1.13E+04 | 1.61E+04 | 1.68E+04 | 0.40             | 3.81E-01 | 2.43E-02 | 0.54    | 4.01E-01 | 3.06E-02  | 1.67E+04 | 8.97E+03 |
| 6.46E+04 | 8.97E+04 | 6.75E+04 | 9.40E+04 | 9.54E+04 | 8.88E+04 | 0.41             | 2.74E-01 | 2.18E-03 | 0.54    | 2.55E-01 | 8.94E-04  | 1.09E+05 | 5.84E+04 |
| 3.46E+05 | 1.83E+05 | 8.19E+04 | 2.85E+05 | 3.67E+05 | 1.01E+05 | 0.38             | 4.43E-01 | 1.96E-02 | 0.54    | 6.14E-01 | 4.47E-02  | 3.45E+05 | 1.85E+05 |
| 4.70E+04 | 5.23E+04 | 4.08E+04 | 4.43E+04 | 5.01E+04 | 8.30E+04 | 0.38             | 4.19E-01 | 4.04E-02 | 0.53    | 4.69E-01 | 5.60E-02  | 6.93E+04 | 3.66E+04 |
| 2.94E+04 | 4.80E+04 | 3.90E+04 | 4.88E+04 | 5.14E+04 | 5.97E+04 | 0.40             | 3.27E-01 | 7.23E-03 | 0.53    | 3.13E-01 | 4.31E-03  | 5.99E+04 | 3.15E+04 |
| 2.80E+04 | 3.98E+04 | 3.27E+04 | 3.33E+04 | 5.78E+04 | 4.78E+04 | 0.38             | 3.51E-01 | 2.38E-02 | 0.52    | 3.57E-01 | 2.73E-02  | 5.60E+04 | 2.92E+04 |
| 1.63E+04 | 2.82E+04 | 2.02E+04 | 3.63E+04 | 5.10E+04 | 3.37E+04 | 0.39             | 4.13E-01 | 1.93E-02 | 0.52    | 4.09E-01 | 1.85E-02  | 3.96E+04 | 2.06E+04 |
| 1.66E+04 | 4.26E+04 | 1.56E+04 | 3.39E+04 | 2.97E+04 | 4.22E+04 | 0.38             | 4.30E-01 | 2.86E-02 | 0.52    | 5.13E-01 | 4.64E-02  | 4.37E+04 | 2.27E+04 |
| 1.33E+04 | 1.79E+04 | 1.91E+04 | 1.56E+03 | 3.27E+04 | 9.79E+04 | 0.41             | 7.98E-01 | 1.08E-01 | 0.52    | 8.91E-01 | 1.58E-01  | 3.93E+04 | 2.04E+04 |
| 2.93E+04 | 2.97E+04 | 5.92E+04 | 7.10E+04 | 5.32E+04 | 1.25E+05 | 0.39             | 4.84E-01 | 3.82E-02 | 0.52    | 5.23E-01 | 4.83E-02  | 8.35E+04 | 4.31E+04 |
| 5.61E+04 | 6.72E+04 | 3.72E+04 | 7.20E+04 | 7.86E+04 | 7.08E+04 | 0.38             | 2.96E-01 | 1.02E-02 | 0.52    | 3.00E-01 | 8.42E-03  | 8.89E+04 | 4.58E+04 |
| 8.78E+04 | 6.17E+04 | 4.88E+04 | 6.06E+04 | 1.12E+05 | 7.53E+04 | 0.37             | 3.46E-01 | 1.32E-02 | 0.50    | 3.91E-01 | 1.61E-02  | 1.05E+05 | 5.24E+04 |
| 1.30E+05 | 1.95E+05 | 1.34E+05 | 1.51E+05 | 2.32E+05 | 2.55E+05 | 0.37             | 4.12E-01 | 3.11E-02 | 0.50    | 4.58E-01 | 3.70E-02  | 2.69E+05 | 1.34E+05 |
| 6.18E+04 | 1.57E+05 | 5.12E+04 | 6.22E+04 | 1.71E+05 | 1.59E+05 | 0.36             | 5.03E-01 | 6.40E-02 | 0.50    | 6.01E-01 | 8.75E-02  | 1.71E+05 | 8.51E+04 |
| 3.03E+04 | 7.20E+04 | 4.66E+04 | 8.13E+04 | 9.58E+04 | 1.10E+05 | 0.39             | 3.64E-01 | 4.87E-03 | 0.49    | 3.76E-01 | 5.18E-03  | 1.03E+05 | 5.06E+04 |
| 2.64E+04 | 4.46E+04 | 3.70E+04 | 4.15E+04 | 5.24E+04 | 1.13E+05 | 0.37             | 4.45E-01 | 2.48E-02 | 0.49    | 5.09E-01 | 4.60E-02  | 7.51E+04 | 3.68E+04 |
| 5.97E+04 | 6.25E+04 | 6.47E+04 | 4.34E+04 | 9.36E+04 | 1.61E+04 | 0.35             | 3.10E-01 | 2.41E-03 | 0.48    | 4.08E-01 | 8.87E-03  | 8.54E+04 | 4.08E+04 |

14 Supplemental Table S2

| Accession #        | Protein                                                              | # of Pep | PEPTIDE                      | Modification                                                                                                              | XCorr | Charge | m/z [Da] |
|--------------------|----------------------------------------------------------------------|----------|------------------------------|---------------------------------------------------------------------------------------------------------------------------|-------|--------|----------|
| 218931165          | Procollagen-lysine,2-oxoglutarate 5-dioxygenase 2                    | 1        | YNCSIESPR                    | Carbamidomethyl(3)Deamidated(2)                                                                                           | 2.87  | 2      | 563.7    |
| 568959025          | Suppressor of tumorigenicity 14 protein homolog                      | 1        | SQFVVSSNSSK                  | Deamidated(8)                                                                                                             | 3.05  | 2      | 585.8    |
| 568940646          | Fibulin-2                                                            | 2        | EGETCGAEDNDTCGVSLYK          | Carbamidomethyl(5)Carbamidomethyl(13)Deamidated(10)                                                                       | 4.93  | 2      | 1053.4   |
| 113865977          | Lactadherin                                                          | 2        | KFEFIQDESGGDKEFLGNLDNNSLK    | Deamidated(21)                                                                                                            | 4.09  | 4      | 712.1    |
| 755498697          | Fibrillin-1                                                          | 5        | CDSGFALDSEERNCTDIDECR        | Carbamidomethyl(1)Carbamidomethyl(14)Carbamidomethyl(20)Deamidated(13)                                                    | 6.01  | 3      | 850.7    |
| 568930638          | Basement membrane-specific heparan sulfate proteoglycan core protein | 8        | CDGDFDCEDRTDEANCSVK          | Carbamidomethyl(1)Carbamidomethyl(7)Carbamidomethyl(16)Deamidated(15)                                                     | 4.42  | 3      | 765.3    |
| 269315863          | Collagen alpha-5(VI)                                                 | 7        | LEGVTMFAMGIEGANNTQLEDIVSYPSR | Deamidated(16)Oxidation(6)Oxidation(9)                                                                                    | 5.85  | 3      | 1025.8   |
| 114052444          | Neutrophil elastase                                                  | 1        | LGTNRPSPSVLQELNVTVVVTNMCR    | Carbamidomethyl(23)Deamidated(15)Oxidation(22)                                                                            | 5.16  | 3      | 901.5    |
| 46849812           | Fibronectin                                                          | 10       | HEEGHMLNCTCFGQGR             | Carbamidomethyl(9)Carbamidomethyl(11)Deamidated(8)Oxidation(6)                                                            | 6.23  | 3      | 650.6    |
| 47059073           | thrombospondin 1                                                     | 1        | GCSSSATNVLLTLDNNVVNGSSPAIR   | Carbamidomethyl(2)Deamidated(19)                                                                                          | 6.06  | 3      | 883.1    |
| 269315863          | Collagen alpha-5(VI)                                                 | 7        | SSANQSEFQQQIQK               | Deamidated(4)                                                                                                             | 4.08  | 2      | 812.4    |
| 568940646          | Fibulin-2                                                            | 2        | DLDECALGTHNCSEAETCHNIQGSFR   | Carbamidomethyl(5)Carbamidomethyl(12)Carbamidomethyl(18)Deamidated(11)                                                    | 8.44  | 3      | 1008.1   |
| 45504394           | Integrin beta-1                                                      | 7        | KENSSEICSNNGECVCGQCVCR       | Carbamidomethyl(8)Carbamidomethyl(14)Carbamidomethyl(16)Carbamidomethyl(19)Carbamidomethyl(21)Deamidated(3)Deamidated(11) | 4.33  | 3      | 883.7    |
| 568958751          | Hypoxia up-regulated protein                                         | 7        | FQISPQLQFSPEEVLMVLNYSR       | Deamidated(20)Oxidation(17)                                                                                               | 5.27  | 3      | 900.5    |
| 46849812           | Fibronectin                                                          | 10       | RHEEGHMLNCTCFGQGR            | Carbamidomethyl(10)Carbamidomethyl(12)Deamidated(9)Oxidation(7)                                                           | 3.79  | 3      | 702.3    |
| 7305277            | Matrix metalloproteinase 9                                           | 1        | TSNLTDQLAEAYLYR              | Deamidated(3)                                                                                                             | 4.82  | 2      | 930.5    |
| 47059073;568916267 | thrombospondin 1                                                     | 1        | VSCPIMPCSNATVPDGECCPR        | Carbamidomethyl(3)Carbamidomethyl(8)Carbamidomethyl(18)Carbamidomethyl(19)Deamidated(10)Oxidation(6)                      | 3.34  | 3      | 808.7    |
| 145966840          | Eosinophil peroxidase                                                | 1        | ALLPFDNLHEDPCLLTNR           | Carbamidomethyl(13)Deamidated(17)                                                                                         | 3.34  | 3      | 713.7    |

| MH+ [Da] | RT [min] | PSM | WT-1     | WT-2     | WT-3     | WT-4     | WT-5     | WT-5-2   | WT-6     | WT-7     | WT-8     | Null-1   | Null-2   |
|----------|----------|-----|----------|----------|----------|----------|----------|----------|----------|----------|----------|----------|----------|
| 1126.5   | 24.1     | 15  | 1.10E+05 | 1.30E+05 | 1.59E+05 | 0.00E+00 | 2.73E+05 | 2.58E+05 | 2.15E+05 | 9.08E+04 | 5.72E+04 | 1.44E+04 | 3.68E+04 |
| 1170.6   | 23.2     | 2   | 4.10E+04 | 2.97E+04 | 4.78E+04 | 2.95E+05 | 6.34E+04 | 2.56E+04 | 4.50E+04 | 1.61E+04 | 1.25E+04 | 1.53E+04 | 4.13E+04 |
| 2105.8   | 32.6     | 16  | 3.63E+05 | 6.98E+05 | 6.99E+05 | 2.12E+05 | 9.08E+05 | 8.81E+05 | 4.36E+05 | 2.86E+05 | 2.13E+05 | 1.24E+05 | 2.15E+05 |
| 2845.4   | 45.5     | 6   | 8.31E+04 | 2.64E+05 | 2.86E+05 | 3.16E+05 | 3.04E+05 | 2.78E+05 | 7.81E+04 | 2.75E+05 | 5.92E+05 | 7.32E+04 | 1.55E+05 |
| 2550.0   | 34.1     | 22  | 1.00E+06 | 5.91E+05 | 2.16E+06 | 3.27E+05 | 2.51E+06 | 2.63E+06 | 5.87E+05 | 7.18E+05 | 1.92E+05 | 3.19E+05 | 5.74E+05 |
| 2293.8   | 24.0     | 1   | 6.09E+04 | 3.70E+04 | 1.34E+05 | 1.84E+04 | 1.74E+05 | 1.62E+05 | 5.20E+04 | 2.76E+04 | 1.55E+04 | 2.17E+04 | 3.65E+04 |
| 3075.4   | 57.6     | 9   | 1.56E+05 | 3.17E+04 | 1.53E+05 | 3.74E+04 | 1.39E+05 | 1.34E+05 | 7.62E+03 | 1.29E+05 | 3.35E+04 | 3.49E+04 | 2.02E+04 |
| 2702.4   | 46.6     | 5   | 1.46E+04 | 8.21E+04 | 7.31E+04 | 1.36E+05 | 9.01E+04 | 7.46E+04 | 1.69E+04 | 1.05E+05 | 1.81E+05 | 1.07E+04 | 6.65E+04 |
| 1949.8   | 22.8     | 89  | 5.42E+06 | 6.15E+06 | 1.10E+07 | 0.00E+00 | 1.48E+07 | 1.36E+07 | 5.75E+06 | 4.39E+06 | 1.22E+06 | 1.30E+06 | 3.01E+06 |
| 2647.3   | 53.9     | 18  | 3.92E+05 | 6.19E+05 | 3.77E+05 | 1.31E+05 | 2.66E+05 | 2.51E+05 | 4.68E+04 | 3.01E+05 | 1.21E+05 | 5.97E+04 | 1.05E+05 |
| 1623.8   | 26.7     | 9   | 2.57E+05 | 4.78E+04 | 1.77E+05 | 6.88E+04 | 2.47E+05 | 1.89E+05 | 9.74E+04 | 1.42E+05 | 3.28E+04 | 4.14E+04 | 5.07E+04 |
| 3022.2   | 33.5     | 28  | 3.50E+05 | 6.49E+05 | 1.14E+06 | 1.01E+05 | 1.14E+06 | 1.08E+06 | 4.95E+05 | 2.97E+05 | 1.27E+05 | 7.52E+04 | 2.65E+05 |
| 2649.0   | 23.5     | 8   | 5.42E+04 | 6.06E+04 | 1.24E+05 | 0.00E+00 | 1.58E+05 | 1.59E+05 | 8.57E+04 | 2.74E+04 | 5.95E+03 | 3.83E+03 | 3.53E+04 |
| 2699.3   | 73.9     | 75  | 1.47E+03 | 9.06E+05 | 1.36E+06 | 4.03E+03 | 1.11E+06 | 8.73E+05 | 5.30E+03 | 1.03E+04 | 3.58E+03 | 1.88E+02 | 1.96E+03 |
| 2104.9   | 20.7     | 112 | 3.38E+06 | 2.92E+06 | 7.29E+06 | 0.00E+00 | 9.05E+06 | 8.79E+06 | 2.42E+06 | 2.66E+06 | 9.21E+05 | 6.95E+05 | 1.33E+05 |
| 1859.9   | 48.2     | 1   | 4.81E+04 | 8.06E+04 | 6.04E+04 | 2.02E+05 | 8.38E+04 | 4.40E+04 | 9.16E+03 | 4.30E+04 | 1.40E+05 | 0.00E+00 | 3.82E+04 |
| 2424.0   | 32.8     | 3   | 7.73E+04 | 1.07E+05 | 1.21E+05 | 2.09E+04 | 9.87E+04 | 1.12E+05 | 2.98E+04 | 4.20E+04 | 9.90E+03 | 1.20E+04 | 2.75E+04 |
| 2139.1   | 51.4     | 14  | 5.44E+05 | 3.06E+05 | 4.58E+05 | 1.77E+05 | 1.35E+06 | 1.11E+06 | 2.13E+05 | 8.32E+05 | 3.36E+05 | 3.30E+04 | 6.40E+04 |

14 Supplemental Table S2

| Null-3   | Null-4   | Null-5   | Null-6   | Null-7   | Null-8   | Ratio<br>Null/WT | SD       | p value  | N Ratio | N SD     | N p value | Avg_WT   | Avg_Null |
|----------|----------|----------|----------|----------|----------|------------------|----------|----------|---------|----------|-----------|----------|----------|
| 2.44E+04 | 6.82E+04 | 3.00E+04 | 6.23E+04 | 7.32E+04 | 1.10E+05 | 0.36             | 4.53E-01 | 1.86E-02 | 0.47    | 4.75E-01 | 1.53E-02  | 7.95E+04 | 3.73E+04 |
| 1.93E+04 | 1.53E+04 | 1.68E+04 | 2.17E+04 | 1.56E+04 | 1.96E+04 | 0.32             | 5.79E-01 | 1.79E-01 | 0.46    | 7.69E-01 | 2.44E-01  | 3.36E+04 | 1.55E+04 |
| 1.06E+05 | 2.38E+05 | 1.13E+05 | 1.51E+05 | 2.97E+05 | 1.98E+05 | 0.35             | 3.15E-01 | 6.02E-03 | 0.46    | 3.28E-01 | 4.26E-03  | 2.90E+05 | 1.33E+05 |
| 2.18E+05 | 5.82E+04 | 8.57E+04 | 1.06E+05 | 7.81E+04 | 6.69E+04 | 0.38             | 4.07E-01 | 9.47E-03 | 0.45    | 6.87E-01 | 1.14E-01  | 1.81E+05 | 8.18E+04 |
| 1.91E+05 | 4.22E+05 | 2.13E+05 | 3.36E+05 | 5.82E+05 | 4.36E+05 | 0.32             | 3.86E-01 | 3.73E-02 | 0.45    | 4.49E-01 | 4.46E-02  | 6.31E+05 | 2.83E+05 |
| 1.16E+04 | 2.32E+04 | 1.60E+04 | 2.43E+04 | 2.51E+04 | 3.23E+04 | 0.32             | 3.69E-01 | 3.97E-02 | 0.44    | 4.37E-01 | 4.65E-02  | 3.97E+04 | 1.76E+04 |
| 1.40E+04 | 3.57E+04 | 1.20E+04 | 5.78E+03 | 3.95E+04 | 8.91E+04 | 0.34             | 5.22E-01 | 2.22E-02 | 0.44    | 6.11E-01 | 4.16E-02  | 5.19E+04 | 2.29E+04 |
| 6.81E+04 | 2.17E+04 | 1.55E+04 | 2.84E+04 | 2.43E+04 | 2.22E+04 | 0.37             | 4.89E-01 | 1.73E-02 | 0.43    | 7.31E-01 | 1.14E-01  | 5.67E+04 | 2.46E+04 |
| 2.07E+06 | 2.62E+06 | 1.27E+06 | 1.52E+06 | 2.21E+06 | 3.19E+06 | 0.31             | 3.40E-01 | 2.45E-02 | 0.43    | 3.98E-01 | 2.50E-02  | 3.72E+06 | 1.60E+06 |
| 1.37E+05 | 8.71E+04 | 4.36E+04 | 4.73E+04 | 8.87E+04 | 1.05E+05 | 0.30             | 3.04E-01 | 9.81E-03 | 0.39    | 4.26E-01 | 2.34E-02  | 1.65E+05 | 6.42E+04 |
| 1.17E+04 | 4.25E+04 | 1.62E+04 | 1.32E+04 | 5.22E+04 | 9.39E+04 | 0.29             | 3.68E-01 | 7.09E-03 | 0.38    | 4.28E-01 | 8.64E-03  | 7.72E+04 | 2.93E+04 |
| 1.05E+05 | 2.03E+05 | 1.10E+05 | 1.03E+05 | 1.85E+05 | 2.59E+05 | 0.27             | 3.20E-01 | 1.56E-02 | 0.37    | 3.69E-01 | 1.39E-02  | 3.22E+05 | 1.20E+05 |
| 1.01E+04 | 2.12E+04 | 1.33E+04 | 1.45E+04 | 3.09E+04 | 3.19E+04 | 0.27             | 3.72E-01 | 2.75E-02 | 0.37    | 4.44E-01 | 2.93E-02  | 3.93E+04 | 1.44E+04 |
| 0.00E+00 | 4.14E+02 | 9.74E+02 | 5.54E+05 | 5.45E+05 | 3.08E+03 | 0.29             | 8.88E-01 | 1.39E-01 | 0.36    | 1.11E+00 | 1.96E-01  | 2.45E+05 | 8.92E+04 |
| 1.34E+06 | 1.58E+06 | 7.73E+05 | 8.47E+05 | 1.29E+06 | 1.73E+06 | 0.25             | 3.31E-01 | 2.43E-02 | 0.35    | 4.14E-01 | 2.10E-02  | 2.23E+06 | 7.91E+05 |
| 1.85E+04 | 6.76E+04 | 9.31E+03 | 6.93E+03 | 8.20E+03 | 2.29E+04 | 0.27             | 4.81E-01 | 2.03E-02 | 0.33    | 6.45E-01 | 5.79E-02  | 4.94E+04 | 1.63E+04 |
| 1.73E+04 | 2.19E+04 | 8.28E+03 | 7.42E+03 | 1.69E+04 | 1.76E+04 | 0.23             | 2.46E-01 | 6.44E-03 | 0.32    | 3.24E-01 | 8.09E-03  | 3.77E+04 | 1.22E+04 |
| 7.33E+04 | 1.53E+05 | 9.68E+04 | 2.28E+05 | 2.39E+05 | 1.80E+05 | 0.23             | 2.90E-01 | 1.07E-02 | 0.28    | 3.08E-01 | 7.51E-03  | 3.38E+05 | 9.51E+04 |

14 Supplemental Table S2



| Accession # | Protein                                 | # of Pep | PEPTIDE                              | Modification                                                                                         | XCorr | Charge | m/z [Da] |
|-------------|-----------------------------------------|----------|--------------------------------------|------------------------------------------------------------------------------------------------------|-------|--------|----------|
| 6754688     | C-type lectin domain family 10 member A | 1        | ATLDNTTSK                            | Deamidated(5)                                                                                        | 2.71  | 2      | 476.2    |
| 755498697   | Fibrillin-1                             | 5        | CTDLDECSNGTHMCSQHADCK                | Carbamidomethyl(1)Carbamidomethyl(7)Carbamidomethyl(14)Carbamidomethyl(20)Deamidated(9)Oxidation(13) | 4.14  | 4      | 636.5    |
| 568933000   | Platelet glycoprotein 4                 | 5        | DPFLSLVPYPISTTVGVFYPYNDTVD<br>GVYK   | Deamidated(22)                                                                                       | 3.6   | 3      | 1122.9   |
| 568997628   | Junctional adhesion molecule B          | 1        | GGTHNNSSYTMNTK                       | Deamidated(6)Oxidation(11)                                                                           | 3.59  | 2      | 764.8    |
| 148747408   | Laminin subunit alpha-4                 | 7        | ALDASNVEYENIANYVSEANETAELAL<br>NITDR | Deamidated(10)Deamidated(19)Deamidated(27)                                                           | 3.73  | 3      | 1129.5   |
| 171846253   | Transmembrane glycoprotein NMB          | 6        | VQAVLTSDSPALVGSNITFVVNLVFP<br>R      | Deamidated(16)                                                                                       | 5.5   | 3      | 948.9    |
| 358030288   | Extracellular matrix protein 1          | 2        | QIPGLIQNMTIR                         | Deamidated(8)Oxidation(9)                                                                            | 2.49  | 2      | 700.9    |

| MH+ [Da] | RT [min] | PSM | WT-1     | WT-2     | WT-3     | WT-4     | WT-5     | WT-5-2   | WT-6     | WT-7     | WT-8     | Null-1   | Null-2   |
|----------|----------|-----|----------|----------|----------|----------|----------|----------|----------|----------|----------|----------|----------|
| 951.5    | 18.7     | 1   | 2.78E+04 | 2.57E+04 | 4.18E+04 | 1.66E+03 | 9.70E+04 | 3.18E+05 | 5.49E+04 | 8.07E+04 | 1.96E+04 | 9.45E+03 | 2.23E+04 |
| 2542.9   | 17.8     | 10  | 6.45E+04 | 1.45E+02 | 3.03E+04 | 3.66E+01 | 2.43E+05 | 3.46E+05 | 6.37E+04 | 3.75E+03 | 0.00E+00 | 0.00E+00 | 7.55E+03 |
| 3366.7   | 79.2     | 204 | 7.44E+03 | 7.88E+04 | 7.31E+06 | 2.12E+03 | 5.90E+06 | 1.04E+05 | 1.08E+04 | 9.67E+04 | 9.45E+03 | 4.74E+03 | 1.37E+04 |
| 1528.6   | 16.0     | 2   | 4.91E+02 | 0.00E+00 | 0.00E+00 | 5.48E+03 | 6.78E+02 | 1.20E+05 | 0.00E+00 | 0.00E+00 | 0.00E+00 | 0.00E+00 | 0.00E+00 |
| 3386.6   | 82.8     | 27  | 6.52E+02 | 2.80E+02 | 3.72E+05 | 0.00E+00 | 0.00E+00 | 0.00E+00 | 8.47E+03 | 1.58E+02 | 7.26E+02 | 1.14E+02 | 2.97E+02 |
| 2844.6   | 81.0     | 30  | 1.60E+02 | 0.00E+00 | 0.00E+00 | 1.04E+02 | 0.00E+00 | 1.35E+02 | 6.46E+05 | 1.31E+02 | 0.00E+00 | 1.72E+02 | 0.00E+00 |
| 1400.8   | 40.4     | 13  | 2.20E+06 | 2.99E+06 | 4.26E+06 | 2.78E+06 | 5.59E+06 | 5.15E+06 | 1.84E+06 | 2.44E+06 | 1.77E+06 | 0.00E+00 | 0.00E+00 |

| Null-3   | Null-4   | Null-5   | Null-6   | Null-7   | Null-8   | Ratio<br>Null/WT | SD       | p value  | N Ratio | N SD     | N p value | Avg_WT   | Avg_Null |
|----------|----------|----------|----------|----------|----------|------------------|----------|----------|---------|----------|-----------|----------|----------|
| 6.87E+03 | 8.88E+03 | 1.88E+04 | 1.61E+04 | 3.08E+03 | 3.41E+04 | 0.20             | 3.98E-01 | 1.03E-01 | 0.27    | 4.74E-01 | 9.93E-02  | 4.05E+04 | 1.10E+04 |
| 5.34E+03 | 8.15E+02 | 0.00E+00 | 2.42E+03 | 1.97E+03 | 5.79E+02 | 0.03             | 7.47E-02 | 8.75E-02 | 0.04    | 1.15E-01 | 8.56E-02  | 4.09E+04 | 1.76E+03 |
| 8.16E+03 | 5.38E+03 | 9.91E+03 | 1.17E+05 | 1.14E+05 | 1.47E+04 | 0.02             | 7.92E-02 | 1.70E-01 | 0.03    | 1.07E-01 | 1.75E-01  | 7.33E+05 | 2.41E+04 |
| 0.00E+00 | 0.00E+00 | 0.00E+00 | 0.00E+00 | 7.80E+02 | 0.00E+00 | 0.01             | 3.92E-02 | 3.22E-01 | 0.01    | 4.92E-02 | 3.23E-01  | 6.97E+03 | 6.07E+01 |
| 2.28E+02 | 6.08E+02 | 0.00E+00 | 0.00E+00 | 0.00E+00 | 3.88E+02 | 0.00             | 1.92E-02 | 3.35E-01 | 0.01    | 2.84E-02 | 3.34E-01  | 2.21E+04 | 1.58E+02 |
| 5.93E+01 | 3.60E+01 | 9.79E+01 | 0.00E+00 | 4.28E+02 | 7.62E+01 | 0.00             | 6.50E-03 | 3.47E-01 | 0.00    | 8.57E-03 | 3.47E-01  | 3.86E+04 | 7.99E+01 |
| 2.41E+03 | 0.00E+00 | 0.00E+00 | 0.00E+00 | 0.00E+00 | 0.00E+00 | 0.00             | 3.06E-04 | 1.40E-04 | 0.00    | 4.66E-04 | 8.15E-06  | 1.81E+06 | 2.70E+02 |

**Supplemental Table S3.** A total of 122 proteins showed significant changes in MMP-9 null mice compared to WT mice.

| Accession # | Protein                                                                      | PEPTIDE                   | Modification                                         | N Ratio | value    |
|-------------|------------------------------------------------------------------------------|---------------------------|------------------------------------------------------|---------|----------|
| 27734196    | Cartilage intermediate layer protein                                         | EQRPGQNCNSNYTVR           | Carbamidomethyl(8)Deamidated(7)                      | 13.13   | 9.90E-07 |
| 568933000   | Platelet glycoprotein 4                                                      | QFWIFDVQNPDDVAKNSSK       | Deamidated(16)                                       | 9.35    | 2.93E-02 |
| 158341636   | latent-transforming growth factor beta-binding protein 2                     | DSSPQAAHVNHLSPPWGLNLTEK   | Deamidated(19)                                       | 7.12    | 1.55E-02 |
| 6753138     | Sodium/potassium-transporting ATPase subunit beta-1                          | LDWLGNCGLNDDSYGYR         | Carbamidomethyl(7)Deamidated(6)                      | 6.74    | 8.58E-03 |
| 156616286   | Collagen alpha-6(VI) chain                                                   | LNANLLSSLWDTFQNK          | Deamidated(15)                                       | 6.37    | 4.00E-02 |
| 6753484     | Collagen alpha-1(VI) chain                                                   | RNFTAADWGHSR              | Deamidated(2)                                        | 5.25    | 3.71E-02 |
| 568920137   | Laminin subunit alpha-5                                                      | EQLQGINASSAAWAR           | Deamidated(7)                                        | 5.09    | 4.82E-02 |
| 61651673    | Dolichyl-diphosphooligosaccharide--protein glycosyltransferase subunit STT3B | TTLVDNNTWNNSHIALVGK       | Deamidated(10)                                       | 4.81    | 2.68E-02 |
| 170784829   | Procollagen galactosyltransferase 1                                          | TALWVATDHNTDNTSAILR       | Deamidated(13)                                       | 4.34    | 2.28E-02 |
| 238637279   | 4F2 cell-surface antigen heavy chain                                         | APLMPWNESSIFHIPRPVSLNMTVK | Deamidated(7)Deamidated(21)Oxidation(4)Oxidation(22) | 4.33    | 1.99E-02 |
| 755498697   | Fibrillin-1                                                                  | AWGTPCELCPVNTSEYK         | Carbamidomethyl(6)Carbamidomethyl(9)Deamidated(13)   | 4.29    | 3.23E-02 |
| 568911077   | Nicastrin                                                                    | ANNSWFQSILK               | Deamidated(2)                                        | 4.14    | 3.18E-02 |
| 755537649   | Platelet endothelial cell adhesion molecule                                  | EKEDRPFHQAVVNDTQAFWHNK    | Deamidated(13)                                       | 4.10    | 1.20E-02 |
| 568939471   | Serum paraoxonase/arylesterase 1                                             | HANWTLTPLK                | Deamidated(3)                                        | 4.05    | 3.78E-02 |
| 568926396   | Tenascin                                                                     | ASTEEVPSLENLTVTEAGWDGLR   | Deamidated(11)                                       | 3.89    | 2.55E-02 |
| 31982236    | Integrin alpha 6                                                             | LWNSTFLEEYSK              | Deamidated(3)                                        | 3.76    | 4.97E-03 |
| 568991244   | Collagen alpha-1(XIV) chain                                                  | SFMVNWTQSPGK              | Deamidated(5)Oxidation(3)                            | 3.75    | 3.73E-02 |
| 171846253   | Transmembrane glycoprotein NMB                                               | NLSDEIFLR                 | Deamidated(1)                                        | 3.66    | 3.19E-02 |
| 46849812    | Fibronectin                                                                  | WTPLNSSTIIGYR             | Deamidated(5)                                        | 3.65    | 4.12E-02 |
| 124494256   | Pro-low-density lipoprotein receptor-related protein 1                       | WTGHNVTVVQR               | Deamidated(5)                                        | 3.62    | 2.40E-02 |
| 148747128   | dolichyl-diphosphooligosaccharide--protein glycosyltransferase subunit STT3A | TILVDNNTWNNTHISR          | Deamidated(10)                                       | 3.52    | 2.15E-02 |
| 6755863     | Endoplasmin                                                                  | HNNDTQHIWESDSNEFSVIADPR   | Deamidated(3)                                        | 3.36    | 3.65E-02 |

| Accession # | Protein                                                                   | PEPTIDE                           | Modification                           | N Ratio | value    |
|-------------|---------------------------------------------------------------------------|-----------------------------------|----------------------------------------|---------|----------|
| 121674797   | Palmitoyl-protein thioesterase 1                                          | FFNDSIVDPVDSEWFGFYR               | Deamidated(3)                          | 3.29    | 4.37E-02 |
| 225543173   | Cartilage-associated protein                                              | DKWGLSDEHFQPRPEAVQFFNV<br>TTLQK   | Deamidated(21)                         | 3.05    | 3.21E-02 |
| 569003077   | Cadherin-2                                                                | RNWTINR                           | Deamidated(2)                          | 3.03    | 1.01E-02 |
| 755537859   | Solute carrier family 2, facilitated glucose transporter member 4         | VIEQSYNATWLGR                     | Deamidated(7)                          | 2.71    | 8.68E-03 |
| 31542891    | Gamma-glutamyltransferase 5                                               | LWDPSSHPGIQNISR                   | Deamidated(12)                         | 2.65    | 2.46E-02 |
| 121583481   | Inhibitor of nuclear factor kappa-B kinase-interacting protein, isoform 1 | FQNITDFWK                         | Deamidated(3)                          | 2.52    | 4.72E-02 |
| 8850219     | Haptoglobin                                                               | VVLHPNHSVVDIGLIK                  | Deamidated(6)                          | 2.36    | 1.01E-02 |
| 568991244   | Collagen alpha-1(XIV) chain                                               | VVDKGNNGSKPTSPEEVK                | Deamidated(6)                          | 2.18    | 3.55E-02 |
| 568972029   | C-type mannose receptor 2                                                 | ASNASKPGTLER                      | Deamidated(3)                          | 2.18    | 3.82E-02 |
| 568962784   | Laminin subunit beta-2                                                    | AQAALDKANASR                      | Deamidated(9)                          | 2.14    | 2.06E-02 |
| 7305599     | Transthyretin                                                             | TLGISPFHEFADVFTANDSGHR            | Deamidated(18)                         | 2.08    | 1.67E-02 |
| 147904569   | Carboxypeptidase N subunit 2                                              | LQDLEITGSPVSNLSAHIFSNLSS<br>LEK   | Deamidated(13)                         | 2.08    | 4.76E-02 |
| 31982712    | Carboxypeptidase B2                                                       | IPFNVLMMNNVEDLIEQQTFNDTV<br>SPR   | Deamidated(20)Oxidation(7)             | 2.07    | 2.47E-02 |
| 147904569   | Carboxypeptidase N subunit 2                                              | LSLDSNNLTALHPALFHNSLR             | Deamidated(6)                          | 2.02    | 2.55E-03 |
| 219521935   | Histocompatibility 2, Q region locus 4                                    | TLLSYYNQSAGGSHTIQVISGCE<br>VGSDGR | Carbamidomethyl(22)Deamidated(7)       | 2.02    | 2.72E-03 |
| 31981720    | Protein Z-dependent protease inhibitor                                    | ASQQLSNETSSFGFNLLR                | Deamidated(7)                          | 2.00    | 3.79E-03 |
| 568956041   | Cadherin-13                                                               | NLSVVILGASDK                      | Deamidated(1)                          | 1.98    | 2.02E-02 |
| 21389311    | Intercellular adhesion molecule 1                                         | VVLLSGVEPRPPTPQVQFTLNAS<br>SEHDKR | Deamidated(21)                         | 1.98    | 9.31E-03 |
| 568994656   | Leukocyte surface antigen CD47                                            | NSTTTDQNFSAK                      | Deamidated(1)Deamidated(8)             | 1.94    | 1.05E-02 |
| 31982712    | Carboxypeptidase B2                                                       | EVHFFVNASDVDSVK                   | Deamidated(7)                          | 1.91    | 1.24E-02 |
| 568990229   | Leukemia inhibitory factor receptor                                       | KVPSNSTETVIESDQFQPGVR             | Deamidated(5)                          | 1.89    | 7.79E-03 |
| 568913156   | Prostaglandin-H2 D-isomerase                                              | TVVAPSTEGGLNLTSTFLR               | Deamidated(12)                         | 1.89    | 1.45E-03 |
| 31981720    | Protein Z-dependent protease inhibitor                                    | LPYQGNATMLVVLMEK                  | Deamidated(6)Oxidation(9)Oxidation(14) | 1.84    | 6.66E-03 |
| 568971816   | Intercellular adhesion molecule 2                                         | ETLKNQTFGGAETVPQEATATF<br>NSTALKK | Deamidated(5)Deamidated(23)            | 1.83    | 1.71E-02 |
| 569006892   | Very low-density lipoprotein receptor                                     | DINTTDILR                         | Deamidated(3)                          | 1.81    | 1.56E-03 |
| 147904569   | Carboxypeptidase N subunit 2                                              | LQLLNLSR                          | Deamidated(5)                          | 1.81    | 8.59E-03 |

| Accession # | Protein                                             | PEPTIDE                              | Modification                                         | N Ratio | value    |
|-------------|-----------------------------------------------------|--------------------------------------|------------------------------------------------------|---------|----------|
| 31981720    | Protein Z-dependent protease inhibitor              | EGNFTSTFDK                           | Deamidated(3)                                        | 1.79    | 4.84E-03 |
| 226874935   | Inter-alpha trypsin inhibitor, heavy chain 2        | GAFISNFTMTVNGMTFTSSIK                | Deamidated(6)Deamidated(12)Oxidation(9)Oxidation(14) | 1.77    | 4.29E-02 |
| 158635948   | N-acetylmuramoyl-L-alanine amidase                  | LEPEHLQLQNISQEQLAQVATLAK             | Deamidated(10)                                       | 1.77    | 1.77E-02 |
| 148747546   | Serine protease inhibitor A3K                       | NLINDYVSNQTQGMK                      | Deamidated(4)Deamidated(9)Oxidation(14)              | 1.75    | 1.78E-02 |
| 160358825   | Beta-2-glycoprotein 1                               | DYRPSAGNNSLYQDTVVFK                  | Deamidated(8)                                        | 1.73    | 1.74E-03 |
| 755509347   | Mannan-binding lectin serine protease 2             | GDSGGALVFLDNETQR                     | Deamidated(12)                                       | 1.72    | 7.59E-04 |
| 755470204   | H-2 class I histocompatibility antigen              | EQNYTCHVYHEGLPEPLTLR                 | Carbamidomethyl(6)Deamidated(3)                      | 1.72    | 4.88E-02 |
| 31982171    | Murinoglobulin-1                                    | YLNQTQQLTQK                          | Deamidated(3)                                        | 1.70    | 5.95E-03 |
| 31982171    | Murinoglobulin-1                                    | NYEVQLFHVNATVTEEGTGLEFSR             | Deamidated(10)                                       | 1.70    | 3.71E-02 |
| 156616286   | Collagen alpha-6(VI) chain                          | EANQTQLR                             | Deamidated(3)                                        | 1.70    | 4.49E-02 |
| 19527214    | Apolipoprotein N                                    | TQNGSLPAVTR                          | Deamidated(3)                                        | 1.66    | 1.48E-02 |
| 109627652   | Complement factor H                                 | LTEFTHNSTMDYK                        | Deamidated(7)Oxidation(10)                           | 1.66    | 2.32E-02 |
| 113865991   | LPS-binding protein                                 | VYHQAGYLNFSITDDMLPHDSGIR             | Deamidated(9)Oxidation(16)                           | 1.66    | 3.11E-02 |
| 568956041   | Cadherin-13                                         | NLSVVILGASDKDLHPNTDPFK               | Deamidated(1)                                        | 1.65    | 1.28E-02 |
| 19527130    | EMILIN-1                                            | ESNSTSLTQAALLEK                      | Deamidated(3)                                        | 1.65    | 1.83E-02 |
| 13507644    | Carboxypeptidase N catalytic chain                  | GMVLDENSNLGTGAVISVTGINHDVTSGEHGDIYFR | Deamidated(10)Oxidation(2)                           | 1.65    | 8.97E-03 |
| 568921717   | Complement factor I                                 | FNVSLIYGR                            | Deamidated(2)                                        | 1.64    | 7.46E-03 |
| 755532856   | Laminin, alpha 2                                    | VFQAESHAACLNDSSAVLDGILDEAK           | Deamidated(12)                                       | 1.64    | 1.07E-02 |
| 225007625   | Interleukin-6 receptor subunit beta                 | VKPTPPYNLSVTNSEEELSSILK              | Deamidated(8)                                        | 1.62    | 3.06E-02 |
| 568956041   | Cadherin-13                                         | ANYNLPIMVTDGKPPMTNITDLR              | Deamidated(19)Oxidation(8)Oxidation(17)              | 1.62    | 6.08E-03 |
| 58037159    | Complement component C8 gamma chain                 | EANLTEDQILFFPK                       | Deamidated(3)                                        | 1.61    | 2.18E-02 |
| 226371752   | Beta-type platelet-derived growth factor receptor   | AINISVIENGYVR                        | Deamidated(3)Deamidated(9)                           | 1.61    | 3.74E-02 |
| 568953122   | Insulin receptor                                    | ELGLYNLMNITR                         | Deamidated(9)Oxidation(8)                            | 1.59    | 3.76E-02 |
| 568956041   | Cadherin-13                                         | INNTHALVSLQLNLNK                     | Deamidated(2)                                        | 1.58    | 1.60E-02 |
| 6753138     | Sodium/potassium-transporting ATPase subunit beta-1 | VLGFKPKPPKNESLETYPLMMK               | Carbamyl(10)Deamidated(11)Oxidation(20)Oxidation(21) | 1.57    | 3.51E-02 |
| 156616286   | Collagen alpha-6(VI) chain                          | GVPQVLIVITDGESHDAEKLNTTAK            | Deamidated(21)                                       | 1.57    | 2.55E-02 |

| Accession # | Protein                                                | PEPTIDE                     | Modification                                               | N Ratio | value    |
|-------------|--------------------------------------------------------|-----------------------------|------------------------------------------------------------|---------|----------|
| 6753138     | Sodium/potassium-transporting ATPase subunit beta-1    | FKLDWLGNCGLNDDSYGYR         | Carbamidomethyl(9)Deamidated(8)                            | 1.56    | 1.28E-03 |
| 31981720    | Protein Z-dependent protease inhibitor                 | EGNFTSTFDKK                 | Deamidated(3)                                              | 1.56    | 4.09E-02 |
| 7242138     | Sodium/potassium-transporting ATPase subunit beta-2    | FLEPYNDSIQAQK               | Deamidated(6)                                              | 1.55    | 2.38E-02 |
| 568990229   | Leukemia inhibitory factor receptor                    | IEGLTNETYR                  | Deamidated(6)                                              | 1.55    | 9.48E-03 |
| 755493733   | Complement component 4 binding protein                 | LACLNGTVLR                  | Carbamidomethyl(3)Deamidated(5)                            | 1.53    | 3.37E-02 |
| 569008736   | Sodium/hydrogen exchanger 7                            | AFSTLLVNVSGK                | Deamidated(8)                                              | 1.53    | 4.96E-02 |
| 27734196    | Cartilage intermediate layer protein                   | LPHDCFQNASNSFYDVGR          | Carbamidomethyl(5)Deamidated(8)                            | 1.51    | 7.57E-03 |
| 568991301   | Plexin B2                                              | VTVEGMEYVFYNDTK             | Deamidated(12)Oxidation(6)                                 | 1.48    | 2.18E-02 |
| 31791059    | CD166 antigen                                          | TVNSLNVSAISIPHEDEADDISDENR  | Deamidated(6)                                              | 1.46    | 4.73E-02 |
| 568915167   | Plasma protease C1 inhibitor                           | DTYVNASQSPLYGSSPR           | Deamidated(5)                                              | 1.41    | 2.37E-02 |
| 225735655   | prosaposin                                             | TNSSFIQGFVDHVK              | Deamidated(2)                                              | 1.38    | 3.47E-02 |
| 148232950   | carboxypeptidase Q                                     | EVMNLLQPLNVTK               | Deamidated(10)Oxidation(3)                                 | 1.38    | 2.65E-02 |
| 568956156   | G-protein coupled receptor 56                          | VTNLSDPVVLTFQHQPQPK         | Deamidated(3)                                              | 1.37    | 3.05E-02 |
| 113205065   | Tissue inhibitor of metalloproteinase 1                | FMGSPEINETTLYQR             | Deamidated(8)Oxidation(2)                                  | 1.36    | 4.68E-02 |
| 156616286   | Collagen alpha-6(VI) chain                             | TEFNLTSSYSSK                | Deamidated(4)                                              | 1.34    | 2.94E-02 |
| 506326690   | Prion-like protein doppel                              | EMLVTSCVNATQAANQAEFSR       | Carbamidomethyl(7)Deamidated(9)Oxidation(2)                | 1.32    | 4.93E-02 |
| 755504148   | Lysosomal protein NCU-G1                               | LLEFDSTNASEGAQPPGKPYPPYSLAK | Deamidated(8)                                              | 1.29    | 4.16E-02 |
| 124494256   | Pro-low-density lipoprotein receptor-related protein 1 | FNSTEYQVVTR                 | Deamidated(2)                                              | 0.79    | 3.73E-02 |
| 224994201   | Inactive serine protease PAMR1                         | SPGFKNLTLHYGMVR             | Deamidated(6)Oxidation(13)                                 | 0.78    | 1.61E-02 |
| 568933707   | ADP-ribosyl cyclase 2                                  | DSSGVINVMLNGSEPK            | Deamidated(11)Oxidation(9)                                 | 0.77    | 4.47E-02 |
| 568915220   | CD44 antigen                                           | TEAADLCQAFNSTLPTMDQMK       | Carbamidomethyl(7)Deamidated(11)Oxidation(17)Oxidation(20) | 0.77    | 3.58E-02 |
| 568941620   | Glucoside xylosyltransferase 2                         | QFNSTQLAAMAPEHEIPK          | Deamidated(3)Oxidation(10)                                 | 0.77    | 4.85E-02 |
| 529250188   | Angiotensin-converting enzyme                          | QQYNSLLSNMSR                | Deamidated(9)Oxidation(10)                                 | 0.77    | 3.93E-02 |
| 160333204   | Transmembrane protein 87A                              | LFQNCSELYK                  | Carbamidomethyl(5)Deamidated(4)                            | 0.76    | 4.87E-02 |
| 755522163   | Integrin alpha-M                                       | AVNQTGALYQCDYSTSR           | Carbamidomethyl(11)Deamidated(3)                           | 0.73    | 1.49E-02 |
| 755522163   | Integrin alpha-M                                       | YLNFTASEMTSK                | Deamidated(3)Oxidation(9)                                  | 0.73    | 2.97E-02 |
| 392871558   | Receptor-type tyrosine-protein phosphatase C           | TSRPTDNSINVTCGPPYETNGPK     | Carbamidomethyl(13)Deamidated(10)Deamidated(20)            | 0.70    | 4.76E-02 |
| 568967343   | tetraspanin 8                                          | ILNETLYENAK                 | Deamidated(3)                                              | 0.70    | 1.33E-02 |

15 Supplemental Table S3

| Accession # | Protein                                                          | PEPTIDE                          | Modification                                                         | N Ratio | value    |
|-------------|------------------------------------------------------------------|----------------------------------|----------------------------------------------------------------------|---------|----------|
| 124494256   | Prolow-density lipoprotein receptor-related protein 1            | DNTTCYEFK                        | Carbamidomethyl(5)Deamidated(2)                                      | 0.70    | 2.30E-02 |
| 568958751   | Hypoxia up-regulated protein 1                                   | VFGSQNLTTVK                      | Deamidated(6)                                                        | 0.69    | 7.55E-03 |
| 172072617   | Peptidyl-prolyl cis-trans isomerase FKBP9                        | YHYNGTFLDGTLDSSHNR               | Deamidated(4)                                                        | 0.69    | 4.89E-02 |
| 19527206    | CD276 antigen                                                    | VVLGANGTYSCVLR                   | Carbamidomethyl(11)Deamidated(6)                                     | 0.68    | 4.89E-02 |
| 153791389   | Integrin alpha-1                                                 | YNHTGQVVIYK                      | Deamidated(2)                                                        | 0.67    | 2.67E-02 |
| 124494256   | Prolow-density lipoprotein receptor-related protein 1            | TCVSNCTASQFVCK                   | Carbamidomethyl(2)Carbamidomethyl(6)Carbamidomethyl(13)Deamidated(5) | 0.67    | 1.53E-02 |
| 568915418   | Prolyl endopeptidase FAP                                         | SVNATDYGLSPDR                    | Deamidated(3)                                                        | 0.66    | 4.83E-02 |
| 226246610   | Alpha-mannosidase 2                                              | GSPGNASQGSIIHLHSPQLALQADPR       | Deamidated(5)                                                        | 0.65    | 1.77E-02 |
| 755522163   | Integrin alpha-M                                                 | DKVTFINTTR                       | Deamidated(7)                                                        | 0.63    | 2.12E-03 |
| 153792543   | ATP-binding cassette sub-family A member 9                       | SMNELDLNYSIDAVR                  | Deamidated(8)Oxidation(2)                                            | 0.63    | 3.17E-02 |
| 568967005   | Receptor-type tyrosine-protein phosphatase beta                  | SFPVYINGSTVPSPVK                 | Deamidated(7)                                                        | 0.62    | 2.20E-02 |
| 45504394    | Integrin beta-1                                                  | LRNPCTSEQNCTSPFSYK               | Carbamidomethyl(5)Carbamidomethyl(11)Deamidated(10)                  | 0.62    | 4.97E-02 |
| 145966911   | Transmembrane emp24 domain-containing protein 9                  | FTFTSHTPGEHQICLHSNSTK            | Carbamidomethyl(14)Deamidated(18)                                    | 0.61    | 3.32E-02 |
| 154240724   | Ectonucleotide pyrophosphatase/phosphodiesterase family member 3 | LNLSEGEVAATVK                    | Deamidated(2)                                                        | 0.61    | 2.00E-02 |
| 254939534   | Peptidyl-prolyl cis-trans isomerase FKBP10                       | YHYNCSLLDGTR                     | Carbamidomethyl(5)Deamidated(4)                                      | 0.60    | 4.32E-02 |
| 124487415   | Latent-transforming growth factor beta-binding protein 3         | DSCQQGSNMTLIGENGHSTDTLTGSGFR     | Carbamidomethyl(3)Deamidated(8)Deamidated(15)Oxidation(9)            | 0.60    | 3.72E-02 |
| 124494256   | Prolow-density lipoprotein receptor-related protein 1            | GCKDNATDSVPLR                    | Carbamidomethyl(2)Deamidated(5)                                      | 0.59    | 4.92E-02 |
| 568988705   | Transmembrane and TPR repeat-containing protein 4                | NLADQGNQTAAIK                    | Deamidated(7)                                                        | 0.58    | 4.12E-03 |
| 755525407   | Fibrinogen-like protein 1                                        | IDLTDFEKNSSFAQYQSFK              | Deamidated(9)                                                        | 0.58    | 1.43E-02 |
| 228008326   | Probable carboxypeptidase X1                                     | SRNSTGMDIVFPANSDAETPVLNLLPEPQVAR | Deamidated(3)Oxidation(7)                                            | 0.58    | 1.98E-02 |
| 269315863   | Collagen alpha-5(VI)                                             | YQEIIIELESSLNK                   | Deamidated(12)                                                       | 0.57    | 4.52E-02 |
| 568989825   | Lysyl oxidase-like protein 2                                     | DPVKNATCENGQPAVVSCVPSQIFSPDGPSR  | Carbamidomethyl(8)Carbamidomethyl(18)Deamidated(5)Deamidated(10)     | 0.57    | 4.59E-02 |
| 224967060   | Matrilin-4                                                       | SLDVGLNATR                       | Deamidated(7)                                                        | 0.56    | 3.07E-02 |
| 228008326   | Probable carboxypeptidase X1                                     | QVNEQCPNITR                      | Carbamidomethyl(6)Deamidated(8)                                      | 0.56    | 2.67E-02 |
| 568987063   | stabilin-1                                                       | GCADYCNQTITK                     | Carbamidomethyl(2)Carbamidomethyl(6)Deamidated(7)                    | 0.55    | 3.62E-02 |

15 Supplemental Table S3



| Accession # | Protein                                                              | PEPTIDE                             | Modification                                                           | N Ratio | value    |
|-------------|----------------------------------------------------------------------|-------------------------------------|------------------------------------------------------------------------|---------|----------|
| 124494256   | Prolow-density lipoprotein receptor-related protein 1                | FGTCSQLCNNTK                        | Carbamidomethyl(4)Carbamidomethyl(8)Deamidated(9)                      | 0.55    | 2.72E-02 |
| 115511022   | Vwf protein                                                          | VPLHCTNGSVVYHEVINAMQCR              | Carbamidomethyl(5)Carbamidomethyl(21)Deamidated(7)Oxidation(19)        | 0.55    | 3.53E-02 |
| 568975598   | Complement C1q tumor necrosis factor-related protein 2               | ILMNEGGHYNASSGK                     | Deamidated(10)Oxidation(3)                                             | 0.54    | 3.06E-02 |
| 224967062   | Macrophage mannose receptor 1                                        | TSYCNEFYFLCK                        | Carbamidomethyl(4)Carbamidomethyl(12)Deamidated(5)                     | 0.54    | 8.94E-04 |
| 568926396   | Tenascin                                                             | TPMLSTDVSTAREPEIGNLNVSDEVTPK        | Deamidated(20)Oxidation(3)                                             | 0.54    | 4.47E-02 |
| 12963767    | KDEL motif-containing protein 1                                      | EMNCSETISQIQK                       | Carbamidomethyl(4)Deamidated(3)Oxidation(2)                            | 0.53    | 4.31E-03 |
| 165905611   | latent transforming growth factor beta binding protein 4             | VNGSCVDVDECATGGR                    | Carbamidomethyl(5)Carbamidomethyl(11)Deamidated(2)                     | 0.52    | 2.73E-02 |
| 225543173   | Cartilage-associated protein                                         | NCSAATPAPAPAGPASHAELR               | Carbamidomethyl(2)Deamidated(1)                                        | 0.52    | 1.85E-02 |
| 568979644   | Fibulin-5                                                            | NHTCTSLQTCYNLQGGFK                  | Carbamidomethyl(4)Carbamidomethyl(10)Deamidated(1)                     | 0.52    | 4.64E-02 |
| 85861262    | Netrin receptor UNC5B                                                | LSDTANYTCVAK                        | Carbamidomethyl(9)Deamidated(6)                                        | 0.52    | 4.83E-02 |
| 568923623   | Translocon-associated protein subunit beta                           | IAPASNVSHTVVLRPLK                   | Deamidated(6)                                                          | 0.52    | 8.42E-03 |
| 46849812    | Fibronectin                                                          | VFAVHQGRESNPLTAQQTTKLDAPTNLQFVNETDR | Deamidated(31)                                                         | 0.50    | 1.61E-02 |
| 45504394    | Integrin beta-1                                                      | KDTCAQECSHFNLTK                     | Carbamidomethyl(4)Carbamidomethyl(8)Deamidated(12)                     | 0.50    | 3.70E-02 |
| 755522163   | Integrin alpha-M                                                     | TPVLNCSVAVCK                        | Carbamidomethyl(6)Carbamidomethyl(11)Deamidated(5)                     | 0.49    | 5.18E-03 |
| 269315863   | Collagen alpha-5(VI)                                                 | SNDSVLEPANR                         | Deamidated(2)                                                          | 0.49    | 4.60E-02 |
| 166064058   | Slit homolog 2 protein                                               | DLEVLTLNNNNITR                      | Deamidated(11)                                                         | 0.48    | 8.87E-03 |
| 218931165   | Procollagen-lysine,2-oxoglutarate 5-dioxygenase 2                    | YNCSIESPR                           | Carbamidomethyl(3)Deamidated(2)                                        | 0.47    | 1.53E-02 |
| 568940646   | Fibulin-2                                                            | EGETCGAEDNDTCGVSLYK                 | Carbamidomethyl(5)Carbamidomethyl(13)Deamidated(10)                    | 0.46    | 4.26E-03 |
| 755498697   | Fibrillin-1                                                          | CDSGFALDSEERNCTDIDECR               | Carbamidomethyl(1)Carbamidomethyl(14)Carbamidomethyl(20)Deamidated(13) | 0.45    | 4.46E-02 |
| 568930638   | Basement membrane-specific heparan sulfate proteoglycan core protein | CDGDFDCEDRTDEANCSVK                 | Carbamidomethyl(1)Carbamidomethyl(7)Carbamidomethyl(16)Deamidated(15)  | 0.44    | 4.65E-02 |
| 269315863   | Collagen alpha-5(VI)                                                 | LEGVTMFAMGIEGANNTQLEDIVSYPSR        | Deamidated(16)Oxidation(6)Oxidation(9)                                 | 0.44    | 4.16E-02 |
| 46849812    | Fibronectin                                                          | HEEGHMLNCTCFGQGR                    | Carbamidomethyl(9)Carbamidomethyl(11)Deamidated(8)Oxidation(6)         | 0.43    | 2.50E-02 |

| Accession #            | Protein                        | PEPTIDE                        | Modification                                                                                                                          | N Ratio | value    |
|------------------------|--------------------------------|--------------------------------|---------------------------------------------------------------------------------------------------------------------------------------|---------|----------|
| 47059073               | Thrombospondin 1               | GCSSSATNVLLTLDNNVVNGSS<br>PAIR | Carbamidomethyl(2)Deamidated(19)                                                                                                      | 0.39    | 2.34E-02 |
| 269315863              | Collagen alpha-5(VI)           | SSANQSEFQQQIQK                 | Deamidated(4)                                                                                                                         | 0.38    | 8.64E-03 |
| 568940646              | Fibulin-2                      | DLDECALGTHNCSEAETCHNIQ<br>GSFR | Carbamidomethyl(5)Carbamidomethyl(12)C<br>arbamidomethyl(18)Deamidated(11)                                                            | 0.37    | 1.39E-02 |
| 45504394               | Integrin beta-1                | KENSSEICSNNGECVCGQCVCR         | Carbamidomethyl(8)Carbamidomethyl(14)C<br>arbamidomethyl(16)Carbamidomethyl(19)Ca<br>rbamidomethyl(21)Deamidated(3)<br>Deamidated(11) | 0.37    | 2.93E-02 |
| 46849812               | Fibronectin                    | RHEEGHMLNCTCFGQGR              | Carbamidomethyl(10)Carbamidomethyl(12)<br>Deamidated(9)Oxidation(7)                                                                   | 0.35    | 2.10E-02 |
| 47059073;56<br>8916267 | thrombospondin 1               | VSCPIMPCS NATVPDGECCPR         | Carbamidomethyl(3)Carbamidomethyl(8)<br>Carbamidomethyl(18)Carbamidomethyl(19)<br>Deamidated(10)Oxidation(6)                          | 0.32    | 8.09E-03 |
| 145966840              | Eosinophil peroxidase          | ALLPFDNLHEDPCLLTNR             | Carbamidomethyl(13)Deamidated(17)                                                                                                     | 0.28    | 7.51E-03 |
| 358030288              | Extracellular matrix protein 1 | QIPGLIQNMTIR                   | Deamidated(8)Oxidation(9)                                                                                                             | 0.00    | 8.15E-06 |

| Supplemental Table S4. Cellular location of all identified proteins |                      |       |       |          |                                                 |                                                |                 |           |
|---------------------------------------------------------------------|----------------------|-------|-------|----------|-------------------------------------------------|------------------------------------------------|-----------------|-----------|
| GO-ID                                                               | Cellular component   | Count | %     | PValue   | Total number of DAVID annotated N-glycoproteins | Total number of DAVID annotated mouse proteins | Fold Enrichment | Benjamini |
| 5576                                                                | extracellular region | 164   | 34.67 | 3.16E-35 | 456                                             | 12504                                          | 2.68            | 7.74E-33  |

|       |                                    |     |       |          |     |       |      |          |
|-------|------------------------------------|-----|-------|----------|-----|-------|------|----------|
| 44421 | extracellular region part          | 102 | 21.56 | 5.39E-31 | 456 | 12504 | 3.61 | 6.60E-29 |
| 31012 | extracellular matrix               | 61  | 12.90 | 1.74E-27 | 456 | 12504 | 5.41 | 1.42E-25 |
| 5578  | proteinaceous extracellular matrix | 57  | 12.05 | 5.08E-25 | 456 | 12504 | 5.26 | 3.11E-23 |
| 9986  | cell surface                       | 47  | 9.94  | 1.02E-16 | 456 | 12504 | 4.23 | 5.44E-15 |

|       |                                  |    |       |          |     |       |       |          |
|-------|----------------------------------|----|-------|----------|-----|-------|-------|----------|
| 44420 | extracellular matrix part        | 25 | 5.29  | 1.30E-14 | 456 | 12504 | 7.45  | 5.30E-13 |
| 5764  | lysosome                         | 31 | 6.55  | 1.67E-12 | 456 | 12504 | 4.78  | 5.83E-11 |
| 323   | lytic vacuole                    | 31 | 6.55  | 1.94E-12 | 456 | 12504 | 4.75  | 5.93E-11 |
| 9897  | external side of plasma membrane | 33 | 6.98  | 2.93E-12 | 456 | 12504 | 4.39  | 7.98E-11 |
| 5604  | basement membrane                | 20 | 4.23  | 8.12E-12 | 456 | 12504 | 7.51  | 1.99E-10 |
| 5773  | vacuole                          | 32 | 6.77  | 1.17E-11 | 456 | 12504 | 4.30  | 2.60E-10 |
| 5615  | extracellular space              | 52 | 10.99 | 4.48E-11 | 456 | 12504 | 2.79  | 9.15E-10 |
| 8305  | integrin complex                 | 13 | 2.75  | 8.36E-11 | 456 | 12504 | 12.73 | 1.58E-09 |
| 5788  | endoplasmic reticulum lumen      | 18 | 3.81  | 5.47E-10 | 456 | 12504 | 6.86  | 9.57E-09 |

|       |                            |     |       |          |     |       |      |          |
|-------|----------------------------|-----|-------|----------|-----|-------|------|----------|
| 5783  | endoplasmic reticulum      | 64  | 13.53 | 2.47E-08 | 456 | 12504 | 2.09 | 4.03E-07 |
| 5886  | plasma membrane            | 156 | 32.98 | 6.08E-08 | 456 | 12504 | 1.47 | 9.31E-07 |
| 44432 | endoplasmic reticulum part | 28  | 5.92  | 8.35E-08 | 456 | 12504 | 3.32 | 1.20E-06 |

|       |                              |    |      |          |     |       |      |          |
|-------|------------------------------|----|------|----------|-----|-------|------|----------|
| 5887  | integral to plasma membrane  | 44 | 9.30 | 6.99E-07 | 456 | 12504 | 2.27 | 9.51E-06 |
| 31226 | intrinsic to plasma membrane | 45 | 9.51 | 7.93E-07 | 456 | 12504 | 2.24 | 1.02E-05 |
| 43235 | receptor complex             | 15 | 3.17 | 1.55E-06 | 456 | 12504 | 4.96 | 1.90E-05 |

|       |                       |     |       |          |     |       |      |          |
|-------|-----------------------|-----|-------|----------|-----|-------|------|----------|
| 31224 | intrinsic to membrane | 262 | 55.39 | 7.39E-06 | 456 | 12504 | 1.21 | 8.62E-05 |
| 42383 | sarcolemma            | 10  | 2.11  | 4.11E-05 | 456 | 12504 | 5.83 | 4.58E-04 |



|       |                      |     |       |          |     |       |       |          |
|-------|----------------------|-----|-------|----------|-----|-------|-------|----------|
| 16021 | integral to membrane | 250 | 52.85 | 4.83E-05 | 456 | 12504 | 1.20  | 5.14E-04 |
| 5605  | basal lamina         | 6   | 1.27  | 6.30E-05 | 456 | 12504 | 12.66 | 6.43E-04 |

|       |                                         |    |       |          |     |       |       |          |
|-------|-----------------------------------------|----|-------|----------|-----|-------|-------|----------|
| 44459 | plasma membrane part                    | 87 | 18.39 | 2.13E-04 | 456 | 12504 | 1.46  | 2.09E-03 |
| 48770 | pigment granule                         | 12 | 2.54  | 2.47E-04 | 456 | 12504 | 3.87  | 2.32E-03 |
| 42470 | melanosome                              | 12 | 2.54  | 2.47E-04 | 456 | 12504 | 3.87  | 2.32E-03 |
| 5770  | late endosome                           | 8  | 1.69  | 9.62E-04 | 456 | 12504 | 4.99  | 8.69E-03 |
| 16011 | dystroglycan complex                    | 4  | 0.85  | 1.50E-03 | 456 | 12504 | 15.67 | 1.31E-02 |
| 16023 | cytoplasmic membrane-bounded vesicle    | 28 | 5.92  | 2.48E-03 | 456 | 12504 | 1.85  | 2.07E-02 |
| 31988 | membrane-bounded vesicle                | 28 | 5.92  | 2.99E-03 | 456 | 12504 | 1.83  | 2.42E-02 |
| 5581  | collagen                                | 5  | 1.06  | 4.34E-03 | 456 | 12504 | 7.22  | 3.38E-02 |
| 31982 | vesicle                                 | 32 | 6.77  | 4.62E-03 | 456 | 12504 | 1.69  | 3.48E-02 |
| 31410 | cytoplasmic vesicle                     | 31 | 6.55  | 6.32E-03 | 456 | 12504 | 1.67  | 4.60E-02 |
| 16010 | dystrophin-associated glycoprotein comp | 4  | 0.85  | 8.24E-03 | 456 | 12504 | 9.14  | 5.79E-02 |

|       |                                       |    |      |          |     |       |       |          |
|-------|---------------------------------------|----|------|----------|-----|-------|-------|----------|
| 31225 | anchored to membrane                  | 16 | 3.38 | 8.71E-03 | 456 | 12504 | 2.12  | 5.94E-02 |
| 45121 | membrane raft                         | 9  | 1.90 | 1.20E-02 | 456 | 12504 | 2.90  | 7.91E-02 |
| 5614  | interstitial matrix                   | 4  | 0.85 | 1.29E-02 | 456 | 12504 | 7.83  | 8.25E-02 |
| 8250  | oligosaccharyltransferase complex     | 3  | 0.63 | 1.80E-02 | 456 | 12504 | 13.71 | 1.10E-01 |
| 16012 | sarcoglycan complex                   | 3  | 0.63 | 1.80E-02 | 456 | 12504 | 13.71 | 1.10E-01 |
| 5606  | laminin-1 complex                     | 3  | 0.63 | 1.80E-02 | 456 | 12504 | 13.71 | 1.10E-01 |
| 5583  | fibrillar collagen                    | 3  | 0.63 | 2.46E-02 | 456 | 12504 | 11.75 | 1.45E-01 |
| 43256 | laminin complex                       | 3  | 0.63 | 2.46E-02 | 456 | 12504 | 11.75 | 1.45E-01 |
| 5794  | Golgi apparatus                       | 36 | 7.61 | 2.52E-02 | 456 | 12504 | 1.45  | 1.45E-01 |
| 30140 | trans-Golgi network transport vesicle | 4  | 0.85 | 2.60E-02 | 456 | 12504 | 6.09  | 1.46E-01 |
| 30141 | secretory granule                     | 10 | 2.11 | 2.68E-02 | 456 | 12504 | 2.34  | 1.47E-01 |
| 267   | cell fraction                         | 32 | 6.77 | 2.88E-02 | 456 | 12504 | 1.47  | 1.53E-01 |
| 5771  | multivesicular body                   | 3  | 0.63 | 4.01E-02 | 456 | 12504 | 9.14  | 2.04E-01 |
| 5768  | endosome                              | 16 | 3.38 | 4.21E-02 | 456 | 12504 | 1.74  | 2.09E-01 |
| 5626  | insoluble fraction                    | 28 | 5.92 | 4.74E-02 | 456 | 12504 | 1.45  | 2.28E-01 |

| FDR      | Genes                                                                                                                                                                                                                                                                                                                                                                                                                                                                                                                                                                                                                                                                                                                                                                                                                                                                                                                                                                                                                                                                                                                                                                                                                                                                                                                                                                                                                                                                                                                                                                                                                                                                                                                                                                                                                                                                                                                                                                                                                                                                                                                                                                                                              |
|----------|--------------------------------------------------------------------------------------------------------------------------------------------------------------------------------------------------------------------------------------------------------------------------------------------------------------------------------------------------------------------------------------------------------------------------------------------------------------------------------------------------------------------------------------------------------------------------------------------------------------------------------------------------------------------------------------------------------------------------------------------------------------------------------------------------------------------------------------------------------------------------------------------------------------------------------------------------------------------------------------------------------------------------------------------------------------------------------------------------------------------------------------------------------------------------------------------------------------------------------------------------------------------------------------------------------------------------------------------------------------------------------------------------------------------------------------------------------------------------------------------------------------------------------------------------------------------------------------------------------------------------------------------------------------------------------------------------------------------------------------------------------------------------------------------------------------------------------------------------------------------------------------------------------------------------------------------------------------------------------------------------------------------------------------------------------------------------------------------------------------------------------------------------------------------------------------------------------------------|
| 4.09E-32 | IPI00135635, IPI00874362, IPI00135633, IPI00128689, IPI00623191, IPI00230616, IPI00116913, IPI00114206, IPI00626350, IPI00877288, IPI00320675, IPI00309214, IPI00225715, IPI00222942, IPI00114810, IPI00130325, IPI00895507, IPI00230527, IPI00129310, IPI00461384, IPI00112039, IPI00124428, IPI00153809, IPI00122122, IPI00468170, IPI00227905, IPI00314779, IPI00122273, IPI00111481, IPI00928284, IPI00124725, IPI00121120, IPI00272690, IPI00122977, IPI00903399, IPI00322712, IPI00279079, IPI00226394, IPI00408751, IPI00137599, IPI00310567, IPI00119152, IPI00153416, IPI00664551, IPI00133500, IPI00117380, IPI00114180, IPI00123635, IPI00125310, IPI00929867, IPI00467068, IPI00648224, IPI00830749, IPI00323114, IPI00830363, IPI00131830, IPI00224073, IPI00123920, IPI00330833, IPI00118413, IPI00114403, IPI00409148, IPI00348266, IPI00313900, IPI00886380, IPI00869476, IPI00122293, IPI00314451, IPI00127560, IPI00885412, IPI00407541, IPI00136513, IPI00762675, IPI00136642, IPI00121240, IPI00750260, IPI00381122, IPI00165807, IPI00120187, IPI00113057, IPI00624663, IPI00127856, IPI00420656, IPI00113539, IPI00405810, IPI00515360, IPI00754176, IPI00798576, IPI00111370, IPI00403307, IPI00119522, IPI00117022, IPI00461535, IPI00322463, IPI00271262, IPI00320420, IPI00114457, IPI00122494, IPI00128026, IPI00473455, IPI00138342, IPI00263041, IPI00648038, IPI00128249, IPI00268030, IPI00353529, IPI00895001, IPI00551206, IPI00223446, IPI00855103, IPI00129225, IPI00265291, IPI00406603, IPI00123223, IPI00116105, IPI00551330, IPI00308484, IPI00339885, IPI00129903, IPI00845610, IPI00331617, IPI00222369, IPI00153258, IPI00621027, IPI00108849, IPI00762704, IPI00317356, IPI00131223, IPI00458003, IPI00400434, IPI00755480, IPI00807737, IPI00923689, IPI00308658, IPI00409393, IPI00114439, IPI00128260, IPI00918142, IPI00119065, IPI00111793, IPI00268475, IPI00120848, IPI00124707, IPI00121114, IPI00119809, IPI00323035, IPI00129965, IPI00135560, IPI00405543, IPI00279302, IPI00129240, IPI00115089, IPI00468055, IPI00121312, IPI00310797, IPI00133751, IPI00118130, IPI00468256, IPI00222188, IPI00751342, IPI00123194, IPI00310049, IPI00123196, IPI00856390 |

|          |                                                                                                                                                                                                                                                                                                                                                                                                                                                                                                                                                                                                                                                                                                                                                                                                                                                                                                                                                                                                                                                                                                                                                                                                                                                                                                                                                                              |
|----------|------------------------------------------------------------------------------------------------------------------------------------------------------------------------------------------------------------------------------------------------------------------------------------------------------------------------------------------------------------------------------------------------------------------------------------------------------------------------------------------------------------------------------------------------------------------------------------------------------------------------------------------------------------------------------------------------------------------------------------------------------------------------------------------------------------------------------------------------------------------------------------------------------------------------------------------------------------------------------------------------------------------------------------------------------------------------------------------------------------------------------------------------------------------------------------------------------------------------------------------------------------------------------------------------------------------------------------------------------------------------------|
| 6.98E-28 | IPI00135633, IPI00128689, IPI00874362, IPI00623191, IPI00230616, IPI00116913, IPI00626350, IPI00320675, IPI00222942, IPI00225715, IPI00130325, IPI00895507, IPI00230527, IPI00129310, IPI00112039, IPI00153809, IPI00227905, IPI00314779, IPI00122273, IPI00111481, IPI00928284, IPI00121120, IPI00122977, IPI00279079, IPI00322712, IPI00226394, IPI00137599, IPI00133500, IPI00664551, IPI00114180, IPI00648224, IPI00830749, IPI00323114, IPI00330833, IPI00118413, IPI00114403, IPI00313900, IPI00122293, IPI00869476, IPI00127560, IPI00885412, IPI00762675, IPI00136642, IPI00121240, IPI00750260, IPI00381122, IPI00120187, IPI00624663, IPI00127856, IPI00420656, IPI00113539, IPI00515360, IPI00798576, IPI00111370, IPI00403307, IPI00322463, IPI00461535, IPI00271262, IPI00114457, IPI00128026, IPI00473455, IPI00138342, IPI00263041, IPI00128249, IPI00268030, IPI00551206, IPI00855103, IPI00223446, IPI00265291, IPI00129225, IPI00406603, IPI00123223, IPI00116105, IPI00551330, IPI00308484, IPI00339885, IPI00129903, IPI00331617, IPI00621027, IPI00317356, IPI00755480, IPI00400434, IPI00807737, IPI00409393, IPI00114439, IPI00128260, IPI00119065, IPI00111793, IPI00120848, IPI00121114, IPI00119809, IPI00279302, IPI00115089, IPI00129240, IPI00468055, IPI00118130, IPI00133751, IPI00468256, IPI00222188, IPI00751342, IPI00123194, IPI00123196 |
| 2.25E-24 | IPI00120187, IPI00128689, IPI00135633, IPI00874362, IPI00623191, IPI00230616, IPI00116913, IPI00420656, IPI00113539, IPI00515360, IPI00626350, IPI00798576, IPI00111370, IPI00403307, IPI00222942, IPI00225715, IPI00130325, IPI00895507, IPI00461535, IPI00230527, IPI00114457, IPI00227905, IPI00314779, IPI00122273, IPI00473455, IPI00263041, IPI00128249, IPI00855103, IPI00223446, IPI00121120, IPI00551330, IPI00308484, IPI00339885, IPI00226394, IPI00129903, IPI00331617, IPI00621027, IPI00807737, IPI00648224, IPI00830749, IPI00409393, IPI00119065, IPI00111793, IPI00114403, IPI00120848, IPI00119809, IPI00313900, IPI00122293, IPI00869476, IPI00279302, IPI00115089, IPI00129240, IPI00133751, IPI00885412, IPI00468256, IPI00762675, IPI00222188, IPI00751342, IPI00123194, IPI00750260, IPI00123196                                                                                                                                                                                                                                                                                                                                                                                                                                                                                                                                                      |
| 6.58E-22 | IPI00120187, IPI00128689, IPI00874362, IPI00623191, IPI00230616, IPI00116913, IPI00420656, IPI00113539, IPI00515360, IPI00626350, IPI00798576, IPI00111370, IPI00403307, IPI00222942, IPI00225715, IPI00130325, IPI00895507, IPI00461535, IPI00230527, IPI00114457, IPI00227905, IPI00314779, IPI00122273, IPI00473455, IPI00263041, IPI00855103, IPI00223446, IPI00121120, IPI00551330, IPI00308484, IPI00339885, IPI00226394, IPI00129903, IPI00621027, IPI00807737, IPI00648224, IPI00409393, IPI00119065, IPI00111793, IPI00114403, IPI00120848, IPI00119809, IPI00313900, IPI00869476, IPI00122293, IPI00279302, IPI00115089, IPI00129240, IPI00133751, IPI00885412, IPI00468256, IPI00762675, IPI00222188, IPI00751342, IPI00123194, IPI00750260, IPI00123196                                                                                                                                                                                                                                                                                                                                                                                                                                                                                                                                                                                                          |
| 1.44E-13 | IPI00474872, IPI00134585, IPI00420955, IPI00762704, IPI00115976, IPI00307966, IPI00798576, IPI00109946, IPI00223264, IPI00875744, IPI00894886, IPI00308940, IPI00720073, IPI00119063, IPI00123746, IPI00128915, IPI00776045, IPI00648026, IPI00762091, IPI00752080, IPI00900395, IPI00876155, IPI00331214, IPI00720113, IPI00120155, IPI00469218, IPI00314779, IPI00415773, IPI00111481, IPI00266264, IPI00896737, IPI00131898, IPI00135010, IPI00654907, IPI00268030, IPI00109254, IPI00468055, IPI00265291, IPI00649920, IPI00453847, IPI00109727, IPI00122973, IPI00121627, IPI00123194, IPI00322712, IPI00126186, IPI00124078, IPI00762242                                                                                                                                                                                                                                                                                                                                                                                                                                                                                                                                                                                                                                                                                                                               |

|          |                                                                                                                                                                                                                                                                                                                                                                                                                                                                                                                                                                                                                                                                                                    |
|----------|----------------------------------------------------------------------------------------------------------------------------------------------------------------------------------------------------------------------------------------------------------------------------------------------------------------------------------------------------------------------------------------------------------------------------------------------------------------------------------------------------------------------------------------------------------------------------------------------------------------------------------------------------------------------------------------------------|
| 1.68E-11 | IPI00874362, IPI00128689, IPI00623191, IPI00230616, IPI00116913, IPI00420656, IPI00113539, IPI00515360, IPI00626350, IPI00648224, IPI00119065, IPI00111793, IPI00114403, IPI00473455, IPI00122273, IPI00263041, IPI00869476, IPI00115089, IPI00223446, IPI00121120, IPI00885412, IPI00762675, IPI00222188, IPI00129903, IPI00226394                                                                                                                                                                                                                                                                                                                                                                |
| 2.16E-09 | IPI00474459, IPI00124097, IPI00108844, IPI00420955, IPI00118830, IPI00115530, IPI00880438, IPI00165730, IPI00126769, IPI00223264, IPI00108811, IPI00127447, IPI00130627, IPI00111960, IPI00124428, IPI00224728, IPI00114839, IPI00856823, IPI00469218, IPI00125266, IPI00459432, IPI00928284, IPI00409458, IPI00221426, IPI00137177, IPI00918314, IPI00308971, IPI00134549, IPI00881091, IPI00113480, IPI00130661                                                                                                                                                                                                                                                                                  |
| 2.51E-09 | IPI00474459, IPI00124097, IPI00108844, IPI00420955, IPI00118830, IPI00115530, IPI00880438, IPI00165730, IPI00126769, IPI00223264, IPI00108811, IPI00127447, IPI00130627, IPI00111960, IPI00124428, IPI00224728, IPI00114839, IPI00856823, IPI00469218, IPI00125266, IPI00459432, IPI00928284, IPI00409458, IPI00221426, IPI00137177, IPI00918314, IPI00308971, IPI00134549, IPI00881091, IPI00113480, IPI00130661                                                                                                                                                                                                                                                                                  |
| 3.79E-09 | IPI00474872, IPI00134585, IPI00420955, IPI00762704, IPI00115976, IPI00798576, IPI00109946, IPI00223264, IPI00875744, IPI00894886, IPI00720073, IPI00308940, IPI00119063, IPI00123746, IPI00128915, IPI00900395, IPI00752080, IPI00876155, IPI00720113, IPI00120155, IPI00469218, IPI00415773, IPI00131898, IPI00266264, IPI00135010, IPI00109254, IPI00468055, IPI00109727, IPI00122973, IPI00121627, IPI00322712, IPI00124078, IPI00762242                                                                                                                                                                                                                                                        |
| 1.05E-08 | IPI00111793, IPI00114403, IPI00874362, IPI00128689, IPI00230616, IPI00116913, IPI00420656, IPI00473455, IPI00122273, IPI00113539, IPI00263041, IPI00515360, IPI00869476, IPI00648224, IPI00223446, IPI00115089, IPI00885412, IPI00119065, IPI00129903, IPI00226394                                                                                                                                                                                                                                                                                                                                                                                                                                 |
| 1.51E-08 | IPI00474459, IPI00124097, IPI00108844, IPI00420955, IPI00118830, IPI00115530, IPI00880438, IPI00165730, IPI00126769, IPI00223264, IPI00108811, IPI00127447, IPI00130627, IPI00111960, IPI00124428, IPI00224728, IPI00114839, IPI00856823, IPI00469218, IPI00125266, IPI00459432, IPI00928284, IPI00409458, IPI00221426, IPI00137177, IPI00918314, IPI00308971, IPI00776237, IPI00134549, IPI00881091, IPI00113480, IPI00130661                                                                                                                                                                                                                                                                     |
| 5.81E-08 | IPI00624663, IPI00135633, IPI00127856, IPI00320675, IPI00225715, IPI00130325, IPI00322463, IPI00271262, IPI00129310, IPI00112039, IPI00114457, IPI00153809, IPI00227905, IPI00128026, IPI00122273, IPI00138342, IPI00263041, IPI00128249, IPI00111481, IPI00268030, IPI00928284, IPI00551206, IPI00265291, IPI00129225, IPI00406603, IPI00116105, IPI00123223, IPI00122977, IPI00279079, IPI00322712, IPI00137599, IPI00133500, IPI00664551, IPI00114180, IPI00317356, IPI00755480, IPI00400434, IPI00830749, IPI00323114, IPI00114439, IPI00128260, IPI00330833, IPI00118413, IPI00121114, IPI00129240, IPI00468055, IPI00127560, IPI00118130, IPI00136642, IPI00751342, IPI00121240, IPI00381122 |
| 1.08E-07 | IPI00648237, IPI00417168, IPI00115976, IPI00415773, IPI00266264, IPI00135010, IPI00377953, IPI00227941, IPI00894886, IPI00776045, IPI00132474, IPI00130117, IPI00752080                                                                                                                                                                                                                                                                                                                                                                                                                                                                                                                            |
| 7.08E-07 | IPI00762897, IPI00137831, IPI00169870, IPI00652514, IPI00652093, IPI00944068, IPI00338561, IPI00138342, IPI00808625, IPI00621617, IPI00123342, IPI00776248, IPI00153187, IPI00227966, IPI00895423, IPI00125514, IPI00129526, IPI00130486                                                                                                                                                                                                                                                                                                                                                                                                                                                           |

|          |                                                                                                                                                                                                                                                                                                                                                                                                                                                                                                                                                                                                                                                                                                                                                                                                                                                                                                                                                                                                                                                                                                                                                                                                                                                                                                                                                                                                                                                                                                                                                                                                                                                                                                                                                                                                                                                                                                                                                                                                                                                                                                                                |
|----------|--------------------------------------------------------------------------------------------------------------------------------------------------------------------------------------------------------------------------------------------------------------------------------------------------------------------------------------------------------------------------------------------------------------------------------------------------------------------------------------------------------------------------------------------------------------------------------------------------------------------------------------------------------------------------------------------------------------------------------------------------------------------------------------------------------------------------------------------------------------------------------------------------------------------------------------------------------------------------------------------------------------------------------------------------------------------------------------------------------------------------------------------------------------------------------------------------------------------------------------------------------------------------------------------------------------------------------------------------------------------------------------------------------------------------------------------------------------------------------------------------------------------------------------------------------------------------------------------------------------------------------------------------------------------------------------------------------------------------------------------------------------------------------------------------------------------------------------------------------------------------------------------------------------------------------------------------------------------------------------------------------------------------------------------------------------------------------------------------------------------------------|
| 3.20E-05 | <p>IPI00137831, IPI00762897, IPI00330481, IPI00120793, IPI00407527, IPI00230422, IPI00123342, IPI00467180, IPI00798576, IPI00130624, IPI00108041, IPI00475154, IPI00895397, IPI00137635, IPI00128336, IPI00850413, IPI00453798, IPI00652093, IPI00120310, IPI00831208, IPI00314779, IPI00831562, IPI00138342, IPI00808625, IPI00110389, IPI00111481, IPI00621617, IPI00268030, IPI00125681, IPI00895423, IPI00122523, IPI00153632, IPI00129526, IPI00130486, IPI00885812, IPI00403586, IPI00652514, IPI00420955, IPI00944068, IPI00118674, IPI00223264, IPI00776248, IPI00880371, IPI00153187, IPI00316469, IPI00125497, IPI00309035, IPI00109108, IPI00918500, IPI00421157, IPI00127407, IPI00127406, IPI00169870, IPI00460669, IPI00338561, IPI00462886, IPI00755329, IPI00808576, IPI00227966, IPI00845575, IPI00125514, IPI00131622, IPI00856220, IPI00649344, IPI00320618</p>                                                                                                                                                                                                                                                                                                                                                                                                                                                                                                                                                                                                                                                                                                                                                                                                                                                                                                                                                                                                                                                                                                                                                                                                                                             |
| 7.88E-05 | <p>IPI00134585, IPI00874362, IPI00135633, IPI00121550, IPI00120793, IPI00923662, IPI00109946, IPI00720073, IPI00114810, IPI00132474, IPI00896674, IPI00128915, IPI00776045, IPI00876154, IPI00403931, IPI00224728, IPI00117986, IPI00406204, IPI00876155, IPI00762812, IPI00153809, IPI00648680, IPI00122122, IPI00857899, IPI00469218, IPI00407419, IPI00314779, IPI00122273, IPI00471022, IPI00666346, IPI00266264, IPI00123996, IPI00122523, IPI00649920, IPI00830707, IPI00113869, IPI00122973, IPI00272690, IPI00109727, IPI00129526, IPI00130117, IPI00118291, IPI00132279, IPI00322712, IPI00124078, IPI00226394, IPI00649554, IPI00229513, IPI00322542, IPI00929863, IPI00113802, IPI00929867, IPI00223264, IPI00830749, IPI00468903, IPI00128358, IPI00377642, IPI00648026, IPI00126834, IPI00330833, IPI00918917, IPI00849722, IPI00857547, IPI00896737, IPI00131898, IPI00377953, IPI00308990, IPI00798466, IPI00407541, IPI00137311, IPI00919012, IPI00230390, IPI00762242, IPI00117424, IPI00346062, IPI00622727, IPI00417168, IPI00123942, IPI00113539, IPI00405810, IPI00230422, IPI00798576, IPI00875744, IPI00894886, IPI00123746, IPI00108041, IPI00117022, IPI00471268, IPI00894602, IPI00752080, IPI00900395, IPI00331214, IPI00134743, IPI00720113, IPI00128022, IPI00648237, IPI00315535, IPI00652093, IPI00121362, IPI00129613, IPI00135010, IPI00654907, IPI00321919, IPI00227941, IPI00321222, IPI00315280, IPI00265291, IPI00112614, IPI00134549, IPI00122368, IPI00129220, IPI00343568, IPI00110503, IPI00874403, IPI00339885, IPI00115793, IPI00474872, IPI00830592, IPI00420955, IPI00875163, IPI00626433, IPI00408895, IPI00621027, IPI00876489, IPI00762704, IPI00115976, IPI00118674, IPI00308940, IPI00119063, IPI00124836, IPI00115116, IPI00876028, IPI00318748, IPI00943419, IPI00229069, IPI00138180, IPI00114839, IPI00268475, IPI00120155, IPI00474965, IPI00223987, IPI00856729, IPI00415773, IPI00881701, IPI00124700, IPI00109254, IPI00468055, IPI00314549, IPI00662285, IPI00754355, IPI00453847, IPI00114641, IPI00131622, IPI00121627, IPI00123194, IPI00138190, IPI00403079</p> |
| 1.08E-04 | <p>IPI00762897, IPI00137831, IPI00652514, IPI00944068, IPI00123342, IPI00776248, IPI00153187, IPI00108041, IPI00316469, IPI00475154, IPI00109108, IPI00309035, IPI00895397, IPI00850413, IPI00169870, IPI00652093, IPI00831562, IPI00338561, IPI00138342, IPI00808625, IPI00621617, IPI00808576, IPI00227966, IPI00895423, IPI00125514, IPI00153632, IPI00129526, IPI00130486</p>                                                                                                                                                                                                                                                                                                                                                                                                                                                                                                                                                                                                                                                                                                                                                                                                                                                                                                                                                                                                                                                                                                                                                                                                                                                                                                                                                                                                                                                                                                                                                                                                                                                                                                                                              |

|          |                                                                                                                                                                                                                                                                                                                                                                                                                                                                                                                                                                                                         |
|----------|---------------------------------------------------------------------------------------------------------------------------------------------------------------------------------------------------------------------------------------------------------------------------------------------------------------------------------------------------------------------------------------------------------------------------------------------------------------------------------------------------------------------------------------------------------------------------------------------------------|
| 9.05E-04 | IPI00117424, IPI00649554, IPI00417168, IPI00929863, IPI00876489, IPI00762704, IPI00115976, IPI00405810, IPI00118674, IPI00223264, IPI00894886, IPI00468903, IPI00114810, IPI00108041, IPI00776045, IPI00132474, IPI00124836, IPI00403931, IPI00876028, IPI00752080, IPI00876155, IPI00762812, IPI00720113, IPI00122122, IPI00330833, IPI00128022, IPI00648237, IPI00407419, IPI00129613, IPI00415773, IPI00857547, IPI00266264, IPI00135010, IPI00377953, IPI00227941, IPI00798466, IPI00112614, IPI00122368, IPI00129220, IPI00110503, IPI00130117, IPI00118291, IPI00403079, IPI00762242              |
| 1.03E-03 | IPI00117424, IPI00649554, IPI00417168, IPI00929863, IPI00876489, IPI00762704, IPI00115976, IPI00405810, IPI00118674, IPI00223264, IPI00894886, IPI00468903, IPI00114810, IPI00108041, IPI00776045, IPI00132474, IPI00124836, IPI00403931, IPI00876028, IPI00752080, IPI00876155, IPI00762812, IPI00720113, IPI00122122, IPI00330833, IPI00128022, IPI00648237, IPI00407419, IPI00129613, IPI00415773, IPI00857547, IPI00266264, IPI00135010, IPI00377953, IPI00227941, IPI00798466, IPI00112614, IPI00122368, IPI00129220, IPI00109727, IPI00110503, IPI00130117, IPI00118291, IPI00403079, IPI00762242 |
| 2.01E-03 | IPI00648237, IPI00417168, IPI00115976, IPI00415773, IPI00266264, IPI00135010, IPI00377953, IPI00227941, IPI00894886, IPI00308990, IPI00468055, IPI00776045, IPI00132474, IPI00130117, IPI00752080                                                                                                                                                                                                                                                                                                                                                                                                       |



|          |                                                                                                                                                                                                                                                                                                                                                                                                                                                                                                                                                                                                                                                                                                                                                                                                                                                                                                                                                                                                                                                                                                                                                                                                                                                                                                                                                                                                                                                                                                                                                                                                                                                                                                                                                                                                                                                                                                                                                                                                                                                                                                                                                                                                                                                                                                                                                                                                                                                                                                                                                                                                                                                                                                                                                                                                                                                                                                                                                                                                                                                                                                                                                                                                                                                                                                                                                                                                                   |
|----------|-------------------------------------------------------------------------------------------------------------------------------------------------------------------------------------------------------------------------------------------------------------------------------------------------------------------------------------------------------------------------------------------------------------------------------------------------------------------------------------------------------------------------------------------------------------------------------------------------------------------------------------------------------------------------------------------------------------------------------------------------------------------------------------------------------------------------------------------------------------------------------------------------------------------------------------------------------------------------------------------------------------------------------------------------------------------------------------------------------------------------------------------------------------------------------------------------------------------------------------------------------------------------------------------------------------------------------------------------------------------------------------------------------------------------------------------------------------------------------------------------------------------------------------------------------------------------------------------------------------------------------------------------------------------------------------------------------------------------------------------------------------------------------------------------------------------------------------------------------------------------------------------------------------------------------------------------------------------------------------------------------------------------------------------------------------------------------------------------------------------------------------------------------------------------------------------------------------------------------------------------------------------------------------------------------------------------------------------------------------------------------------------------------------------------------------------------------------------------------------------------------------------------------------------------------------------------------------------------------------------------------------------------------------------------------------------------------------------------------------------------------------------------------------------------------------------------------------------------------------------------------------------------------------------------------------------------------------------------------------------------------------------------------------------------------------------------------------------------------------------------------------------------------------------------------------------------------------------------------------------------------------------------------------------------------------------------------------------------------------------------------------------------------------------|
| 9.57E-03 | <p>IPI00134585, IPI00121550, IPI00330481, IPI00120793, IPI00468236, IPI00923662, IPI00880438, IPI00307966, IPI00467180, IPI00124221, IPI00109946, IPI00130624, IPI00620858, IPI00114810, IPI00776045, IPI00128915, IPI00132474, IPI00403931, IPI00876154, IPI00830869, IPI00406204, IPI00653522, IPI00762812, IPI00876155, IPI00137635, IPI00153809, IPI00122122, IPI00831208, IPI00314779, IPI00122273, IPI00266264, IPI00118108, IPI00122523, IPI00342691, IPI00453488, IPI00113869, IPI00272690, IPI00119759, IPI00229513, IPI00468903, IPI00377642, IPI00648026, IPI00403540, IPI00421157, IPI00126834, IPI00330833, IPI00918917, IPI00830554, IPI00849722, IPI00857547, IPI00132189, IPI00131898, IPI00896737, IPI00880403, IPI00221911, IPI00377953, IPI00830857, IPI00885412, IPI00137311, IPI00229925, IPI00660240, IPI00762677, IPI00113747, IPI00126186, IPI00346062, IPI00230422, IPI00222589, IPI00279051, IPI00117022, IPI00475154, IPI00471268, IPI00895397, IPI00894602, IPI00648237, IPI00128022, IPI00128024, IPI00453798, IPI00121362, IPI00463492, IPI00654907, IPI00227941, IPI00410796, IPI00315280, IPI00467883, IPI00380009, IPI00122368, IPI00112614, IPI00343568, IPI00110503, IPI00885812, IPI00874403, IPI00115793, IPI00474872, IPI00648264, IPI00626433, IPI00408895, IPI00876489, IPI00404126, IPI00880371, IPI00119063, IPI00127447, IPI00405742, IPI00848768, IPI00762091, IPI00380296, IPI00115116, IPI00121776, IPI00876028, IPI00465876, IPI00268475, IPI00474965, IPI00319509, IPI00223987, IPI00856729, IPI00129968, IPI00808576, IPI00895258, IPI00109254, IPI00662285, IPI00114641, IPI00753530, IPI00128905, IPI00329876, IPI00124097, IPI00129304, IPI00130573, IPI00720073, IPI00896674, IPI00123704, IPI00309015, IPI00224728, IPI00117986, IPI00648680, IPI00850413, IPI00469218, IPI00857899, IPI00880730, IPI00407419, IPI00120310, IPI00228719, IPI00228716, IPI00471022, IPI00828496, IPI00123996, IPI00221833, IPI00648270, IPI00649920, IPI00830707, IPI00109727, IPI00122973, IPI00130117, IPI00118291, IPI00132279, IPI00785382, IPI00124078, IPI00649554, IPI00461617, IPI00322542, IPI00929863, IPI00113802, IPI00929762, IPI00929867, IPI00170152, IPI00223264, IPI00323114, IPI00128358, IPI00125497, IPI00316469, IPI00130758, IPI00658632, IPI00788455, IPI00459432, IPI00153756, IPI00918314, IPI00308990, IPI00845575, IPI00776237, IPI00798466, IPI00407541, IPI00919012, IPI00856220, IPI00649344, IPI00378224, IPI00221998, IPI00230390, IPI00762242, IPI00117424, IPI00622727, IPI00929846, IPI00417168, IPI00226260, IPI00123942, IPI00405810, IPI00875744, IPI00894886, IPI00123746, IPI00108041, IPI00900395, IPI00752080, IPI00331214, IPI00134743, IPI00720113, IPI00315535, IPI00889900, IPI00321634, IPI00129613, IPI00831562, IPI00169896, IPI00755592, IPI00135010, IPI00125681, IPI00321919, IPI00308971, IPI00321222, IPI00265291, IPI00227000, IPI00153632, IPI00134549, IPI00129220, IPI00108844, IPI00403586, IPI00830592, IPI00875163, IPI00420955, IPI00762704, IPI00108849, IPI00118830, IPI00115976, IPI00458003, IPI00118674, IPI00308940, IPI00129236, IPI00309035, IPI00881694, IPI00109108, IPI00124836, IPI00131021, IPI00318748, IPI00831033, IPI00943419, IPI00229069, IPI00114044, IPI00138180, IPI00114839, IPI00120155, IPI00110262, IPI00876232, IPI00462886, IPI00415773, IPI00755329, IPI00124700, IPI00115089</p> |
| 5.32E-02 | <p>IPI00830749, IPI00229513, IPI00469218, IPI00135633, IPI00874362, IPI00621027, IPI00132474, IPI00122273, IPI00123194, IPI00339885</p>                                                                                                                                                                                                                                                                                                                                                                                                                                                                                                                                                                                                                                                                                                                                                                                                                                                                                                                                                                                                                                                                                                                                                                                                                                                                                                                                                                                                                                                                                                                                                                                                                                                                                                                                                                                                                                                                                                                                                                                                                                                                                                                                                                                                                                                                                                                                                                                                                                                                                                                                                                                                                                                                                                                                                                                                                                                                                                                                                                                                                                                                                                                                                                                                                                                                           |

|          |                                                                                                                                                                                                                                                                                                                                                                                                                                                                                                                                                                                                                                                                                                                                                                                                                                                                                                                                                                                                                                                                                                                                                                                                                                                                                                                                                                                                                                                                                                                                                                                                                                                                                                                                                                                                                                                                                                                                                                                                                                                                                                                                                                                                                                                                                                                                                                                                                                                                                                                                                                                                                                                                                                                                                                                                                                                                                                                                                                                                                                                                                                                                                                                                                                                                                                                                                                                                                                                                                             |
|----------|---------------------------------------------------------------------------------------------------------------------------------------------------------------------------------------------------------------------------------------------------------------------------------------------------------------------------------------------------------------------------------------------------------------------------------------------------------------------------------------------------------------------------------------------------------------------------------------------------------------------------------------------------------------------------------------------------------------------------------------------------------------------------------------------------------------------------------------------------------------------------------------------------------------------------------------------------------------------------------------------------------------------------------------------------------------------------------------------------------------------------------------------------------------------------------------------------------------------------------------------------------------------------------------------------------------------------------------------------------------------------------------------------------------------------------------------------------------------------------------------------------------------------------------------------------------------------------------------------------------------------------------------------------------------------------------------------------------------------------------------------------------------------------------------------------------------------------------------------------------------------------------------------------------------------------------------------------------------------------------------------------------------------------------------------------------------------------------------------------------------------------------------------------------------------------------------------------------------------------------------------------------------------------------------------------------------------------------------------------------------------------------------------------------------------------------------------------------------------------------------------------------------------------------------------------------------------------------------------------------------------------------------------------------------------------------------------------------------------------------------------------------------------------------------------------------------------------------------------------------------------------------------------------------------------------------------------------------------------------------------------------------------------------------------------------------------------------------------------------------------------------------------------------------------------------------------------------------------------------------------------------------------------------------------------------------------------------------------------------------------------------------------------------------------------------------------------------------------------------------------|
| 6.25E-02 | IPI00134585, IPI00330481, IPI00121550, IPI00468236, IPI00923662, IPI00880438, IPI00307966, IPI00467180, IPI00124221,<br>IPI00130624, IPI00620858, IPI00114810, IPI00776045, IPI00128915, IPI00132474, IPI00876154, IPI00403931, IPI00830869,<br>IPI00406204, IPI00653522, IPI00762812, IPI00876155, IPI00137635, IPI00122122, IPI00831208, IPI00314779, IPI00122273,<br>IPI00266264, IPI00118108, IPI00122523, IPI00342691, IPI00453488, IPI00113869, IPI00272690, IPI00119759, IPI00229513,<br>IPI00468903, IPI00377642, IPI00648026, IPI00403540, IPI00421157, IPI00126834, IPI00330833, IPI00918917, IPI00830554,<br>IPI00849722, IPI00857547, IPI00132189, IPI00131898, IPI00896737, IPI00880403, IPI00221911, IPI00377953, IPI00830857,<br>IPI00885412, IPI00137311, IPI00229925, IPI00660240, IPI00762677, IPI00113747, IPI00126186, IPI00346062, IPI00230422,<br>IPI00222589, IPI00279051, IPI00117022, IPI00475154, IPI00471268, IPI00895397, IPI00894602, IPI00648237, IPI00128022,<br>IPI00128024, IPI00453798, IPI00121362, IPI00463492, IPI00654907, IPI00227941, IPI00410796, IPI00467883, IPI00380009,<br>IPI00122368, IPI00112614, IPI00343568, IPI00110503, IPI00885812, IPI00874403, IPI00115793, IPI00474872, IPI00648264,<br>IPI00626433, IPI00408895, IPI00876489, IPI00404126, IPI00880371, IPI00119063, IPI00127447, IPI00405742, IPI00848768,<br>IPI00762091, IPI00380296, IPI00121776, IPI00115116, IPI00876028, IPI00465876, IPI00268475, IPI00474965, IPI00319509,<br>IPI00223987, IPI00856729, IPI00129968, IPI00808576, IPI00895258, IPI00109254, IPI00662285, IPI00114641, IPI00753530,<br>IPI00128905, IPI00329876, IPI00124097, IPI00129304, IPI00130573, IPI00720073, IPI00123704, IPI00309015, IPI00224728,<br>IPI00117986, IPI00648680, IPI00850413, IPI00469218, IPI00857899, IPI00880730, IPI00407419, IPI00120310, IPI00228719,<br>IPI00228716, IPI00471022, IPI00828496, IPI00123996, IPI00221833, IPI00648270, IPI00649920, IPI00830707, IPI00122973,<br>IPI00130117, IPI00118291, IPI00785382, IPI00124078, IPI00649554, IPI00461617, IPI00322542, IPI00929863, IPI00113802,<br>IPI00929762, IPI00929867, IPI00170152, IPI00223264, IPI00323114, IPI00128358, IPI00125497, IPI00316469, IPI00130758,<br>IPI00658632, IPI00788455, IPI00459432, IPI00153756, IPI00918314, IPI00308990, IPI00845575, IPI00776237, IPI00798466,<br>IPI00407541, IPI00856220, IPI00649344, IPI00378224, IPI00221998, IPI00230390, IPI00762242, IPI00117424, IPI00622727,<br>IPI00929846, IPI00417168, IPI00226260, IPI00123942, IPI00405810, IPI00875744, IPI00894886, IPI00108041, IPI00900395,<br>IPI00752080, IPI00331214, IPI00720113, IPI00889900, IPI00321634, IPI00129613, IPI00831562, IPI00169896, IPI00755592,<br>IPI00135010, IPI00125681, IPI00321919, IPI00308971, IPI00321222, IPI00265291, IPI00227000, IPI00153632, IPI00134549,<br>IPI00129220, IPI00830592, IPI00403586, IPI00108844, IPI00875163, IPI00420955, IPI00762704, IPI00108849, IPI00118830,<br>IPI00115976, IPI00458003, IPI00118674, IPI00308940, IPI00129236, IPI00109108, IPI00309035, IPI00881694, IPI00124836,<br>IPI00131021, IPI00318748, IPI00831033, IPI00943419, IPI00229069, IPI00114044, IPI00138180, IPI00114839, IPI00120155,<br>IPI00110262, IPI00462886, IPI00876232, IPI00415773, IPI00755329, IPI00124700, IPI00115089, IPI00468055, IPI00314549,<br>IPI00453847, IPI00754355, IPI00321101, IPI00121627, IPI00930841, IPI00138190, IPI00403079, IPI00831533, IPI00320618 |
| 8.16E-02 | IPI00115089, IPI00223446, IPI00874362, IPI00116913, IPI00885412, IPI00515360                                                                                                                                                                                                                                                                                                                                                                                                                                                                                                                                                                                                                                                                                                                                                                                                                                                                                                                                                                                                                                                                                                                                                                                                                                                                                                                                                                                                                                                                                                                                                                                                                                                                                                                                                                                                                                                                                                                                                                                                                                                                                                                                                                                                                                                                                                                                                                                                                                                                                                                                                                                                                                                                                                                                                                                                                                                                                                                                                                                                                                                                                                                                                                                                                                                                                                                                                                                                                |

|          |                                                                                                                                                                                                                                                                                                                                                                                                                                                                                                                                                                                                                                                                                                                                                                                                                                                                                                                                                                                                                                                                                                                                                                           |
|----------|---------------------------------------------------------------------------------------------------------------------------------------------------------------------------------------------------------------------------------------------------------------------------------------------------------------------------------------------------------------------------------------------------------------------------------------------------------------------------------------------------------------------------------------------------------------------------------------------------------------------------------------------------------------------------------------------------------------------------------------------------------------------------------------------------------------------------------------------------------------------------------------------------------------------------------------------------------------------------------------------------------------------------------------------------------------------------------------------------------------------------------------------------------------------------|
| 2.76E-01 | IPI00117424, IPI00622727, IPI00417168, IPI00134585, IPI00135633, IPI00121550, IPI00113539, IPI00405810, IPI00109946, IPI00798576, IPI00875744, IPI00894886, IPI00720073, IPI00114810, IPI00123746, IPI00108041, IPI00776045, IPI00128915, IPI00132474, IPI00403931, IPI00900395, IPI00752080, IPI00876155, IPI00762812, IPI00720113, IPI00122122, IPI00469218, IPI00648237, IPI00128022, IPI00407419, IPI00121362, IPI00129613, IPI00122273, IPI00666346, IPI00266264, IPI00135010, IPI00227941, IPI00830707, IPI00122368, IPI00112614, IPI00129220, IPI00109727, IPI00122973, IPI00110503, IPI00129526, IPI00118291, IPI00130117, IPI00322712, IPI00226394, IPI00115793, IPI00124078, IPI00649554, IPI00474872, IPI00229513, IPI00420955, IPI00322542, IPI00875163, IPI00626433, IPI00762704, IPI00876489, IPI00929863, IPI00115976, IPI00929867, IPI00118674, IPI00223264, IPI00468903, IPI00308940, IPI00119063, IPI00124836, IPI00876028, IPI00229069, IPI00138180, IPI00330833, IPI00120155, IPI00474965, IPI00849722, IPI00857547, IPI00415773, IPI00131898, IPI00377953, IPI00109254, IPI00468055, IPI00798466, IPI00121627, IPI00403079, IPI00230390, IPI00762242 |
| 3.19E-01 | IPI00469218, IPI00309035, IPI00881694, IPI00113869, IPI00132474, IPI00881091, IPI00114641, IPI00129526, IPI00118674, IPI00124700, IPI00124221, IPI00130661                                                                                                                                                                                                                                                                                                                                                                                                                                                                                                                                                                                                                                                                                                                                                                                                                                                                                                                                                                                                                |
| 3.19E-01 | IPI00469218, IPI00309035, IPI00881694, IPI00113869, IPI00132474, IPI00881091, IPI00114641, IPI00129526, IPI00118674, IPI00124700, IPI00124221, IPI00130661                                                                                                                                                                                                                                                                                                                                                                                                                                                                                                                                                                                                                                                                                                                                                                                                                                                                                                                                                                                                                |
| 1.24E+00 | IPI00114839, IPI00875744, IPI00108844, IPI00469218, IPI00130627, IPI00134549, IPI00224728, IPI00223264                                                                                                                                                                                                                                                                                                                                                                                                                                                                                                                                                                                                                                                                                                                                                                                                                                                                                                                                                                                                                                                                    |
| 1.93E+00 | IPI00468903, IPI00124836, IPI00122273, IPI00110503                                                                                                                                                                                                                                                                                                                                                                                                                                                                                                                                                                                                                                                                                                                                                                                                                                                                                                                                                                                                                                                                                                                        |
| 3.16E+00 | IPI00135633, IPI00420955, IPI00408895, IPI00115530, IPI00118674, IPI00124221, IPI00122302, IPI00798576, IPI00309035, IPI00881694, IPI00132474, IPI00648026, IPI00895397, IPI00114457, IPI00469218, IPI00474965, IPI00849722, IPI00124700, IPI00308971, IPI00134549, IPI00881091, IPI00113869, IPI00406603, IPI00113480, IPI00114641, IPI00129526, IPI00130661, IPI00762242                                                                                                                                                                                                                                                                                                                                                                                                                                                                                                                                                                                                                                                                                                                                                                                                |
| 3.80E+00 | IPI00135633, IPI00420955, IPI00408895, IPI00115530, IPI00118674, IPI00124221, IPI00122302, IPI00798576, IPI00309035, IPI00881694, IPI00132474, IPI00648026, IPI00895397, IPI00114457, IPI00469218, IPI00474965, IPI00849722, IPI00124700, IPI00308971, IPI00134549, IPI00881091, IPI00113869, IPI00406603, IPI00113480, IPI00114641, IPI00129526, IPI00130661, IPI00762242                                                                                                                                                                                                                                                                                                                                                                                                                                                                                                                                                                                                                                                                                                                                                                                                |
| 5.48E+00 | IPI00128689, IPI00623191, IPI00121120, IPI00222188, IPI00626350                                                                                                                                                                                                                                                                                                                                                                                                                                                                                                                                                                                                                                                                                                                                                                                                                                                                                                                                                                                                                                                                                                           |
| 5.82E+00 | IPI00134585, IPI00135633, IPI00420955, IPI00408895, IPI00115530, IPI00880438, IPI00118674, IPI00124221, IPI00798576, IPI00122302, IPI00309035, IPI00881694, IPI00132474, IPI00648026, IPI00895397, IPI00114457, IPI00469218, IPI00474965, IPI00223987, IPI00849722, IPI00131898, IPI00124700, IPI00308971, IPI00134549, IPI00113869, IPI00881091, IPI00113480, IPI00406603, IPI00114641, IPI00129526, IPI00130661, IPI00762242                                                                                                                                                                                                                                                                                                                                                                                                                                                                                                                                                                                                                                                                                                                                            |
| 7.88E+00 | IPI00134585, IPI00135633, IPI00420955, IPI00408895, IPI00115530, IPI00880438, IPI00118674, IPI00124221, IPI00798576, IPI00122302, IPI00309035, IPI00881694, IPI00132474, IPI00648026, IPI00895397, IPI00114457, IPI00469218, IPI00474965, IPI00849722, IPI00131898, IPI00124700, IPI00308971, IPI00134549, IPI00881091, IPI00113869, IPI00113480, IPI00406603, IPI00114641, IPI00129526, IPI00130661, IPI00762242                                                                                                                                                                                                                                                                                                                                                                                                                                                                                                                                                                                                                                                                                                                                                         |
| 1.02E+01 | IPI00468903, IPI00124836, IPI00122273, IPI00110503                                                                                                                                                                                                                                                                                                                                                                                                                                                                                                                                                                                                                                                                                                                                                                                                                                                                                                                                                                                                                                                                                                                        |

|          |                                                                                                                                                                                                                                                                                                                                                                                                                                                                                    |
|----------|------------------------------------------------------------------------------------------------------------------------------------------------------------------------------------------------------------------------------------------------------------------------------------------------------------------------------------------------------------------------------------------------------------------------------------------------------------------------------------|
| 1.07E+01 | IPI00153809, IPI00134743, IPI00315535, IPI00120793, IPI00109946, IPI00308990, IPI00321222, IPI00123746, IPI00315280, IPI00896674, IPI00131622, IPI00109727, IPI00919012, IPI00132279, IPI00126834, IPI00900395                                                                                                                                                                                                                                                                     |
| 1.45E+01 | IPI00648680, IPI00229513, IPI00308990, IPI00120793, IPI00776045, IPI00109727, IPI00131622, IPI00122273, IPI00331214                                                                                                                                                                                                                                                                                                                                                                |
| 1.55E+01 | IPI00461535, IPI00473455, IPI00869476, IPI00279302                                                                                                                                                                                                                                                                                                                                                                                                                                 |
| 2.09E+01 | IPI00316469, IPI00475154, IPI00109108                                                                                                                                                                                                                                                                                                                                                                                                                                              |
| 2.09E+01 | IPI00468903, IPI00124836, IPI00110503                                                                                                                                                                                                                                                                                                                                                                                                                                              |
| 2.09E+01 | IPI00223446, IPI00874362, IPI00116913                                                                                                                                                                                                                                                                                                                                                                                                                                              |
| 2.75E+01 | IPI00623191, IPI00222188, IPI00626350                                                                                                                                                                                                                                                                                                                                                                                                                                              |
| 2.75E+01 | IPI00223446, IPI00874362, IPI00116913                                                                                                                                                                                                                                                                                                                                                                                                                                              |
| 2.81E+01 | IPI00420955, IPI00648426, IPI00120793, IPI00408895, IPI00108849, IPI00230422, IPI00118674, IPI00223264, IPI00875744, IPI00125497, IPI00129236, IPI00648026, IPI00131021, IPI00403540, IPI00130758, IPI00876028, IPI00114044, IPI00137635, IPI00331214, IPI00321634, IPI00831208, IPI00228719, IPI00111481, IPI00808576, IPI00268030, IPI00221833, IPI00308971, IPI00321222, IPI00112614, IPI00131622, IPI00128905, IPI00321101, IPI00119759, IPI00762677, IPI00113747, IPI00762242 |
| 2.89E+01 | IPI00308971, IPI00420955, IPI00408895, IPI00762242                                                                                                                                                                                                                                                                                                                                                                                                                                 |
| 2.97E+01 | IPI00135633, IPI00881694, IPI00134549, IPI00648026, IPI00406603, IPI00113480, IPI00115530, IPI00798576, IPI00122302, IPI00114457                                                                                                                                                                                                                                                                                                                                                   |
| 3.15E+01 | IPI00229513, IPI00403586, IPI00420955, IPI00115976, IPI00317356, IPI00307966, IPI00118674, IPI00270333, IPI00130624, IPI00323114, IPI00119063, IPI00109108, IPI00132474, IPI00648026, IPI00776045, IPI00130758, IPI00124428, IPI00720113, IPI00648680, IPI00648237, IPI00319509, IPI00407419, IPI00223987, IPI00129613, IPI00122273, IPI00918314, IPI00308971, IPI00122523, IPI00134549, IPI00137311, IPI00130661, IPI00762242                                                     |
| 4.12E+01 | IPI00875744, IPI00469218, IPI00223264                                                                                                                                                                                                                                                                                                                                                                                                                                              |
| 4.27E+01 | IPI00114839, IPI00108844, IPI00469218, IPI00420955, IPI00124700, IPI00223264, IPI00875744, IPI00308971, IPI00128358, IPI00130627, IPI00380009, IPI00134549, IPI00403540, IPI00224728, IPI00762242, IPI00320618                                                                                                                                                                                                                                                                     |
| 4.67E+01 | IPI00229513, IPI00403586, IPI00420955, IPI00115976, IPI00317356, IPI00307966, IPI00118674, IPI00270333, IPI00130624,                                                                                                                                                                                                                                                                                                                                                               |

## SUPPLEMENTAL FIGURE LEGENDS

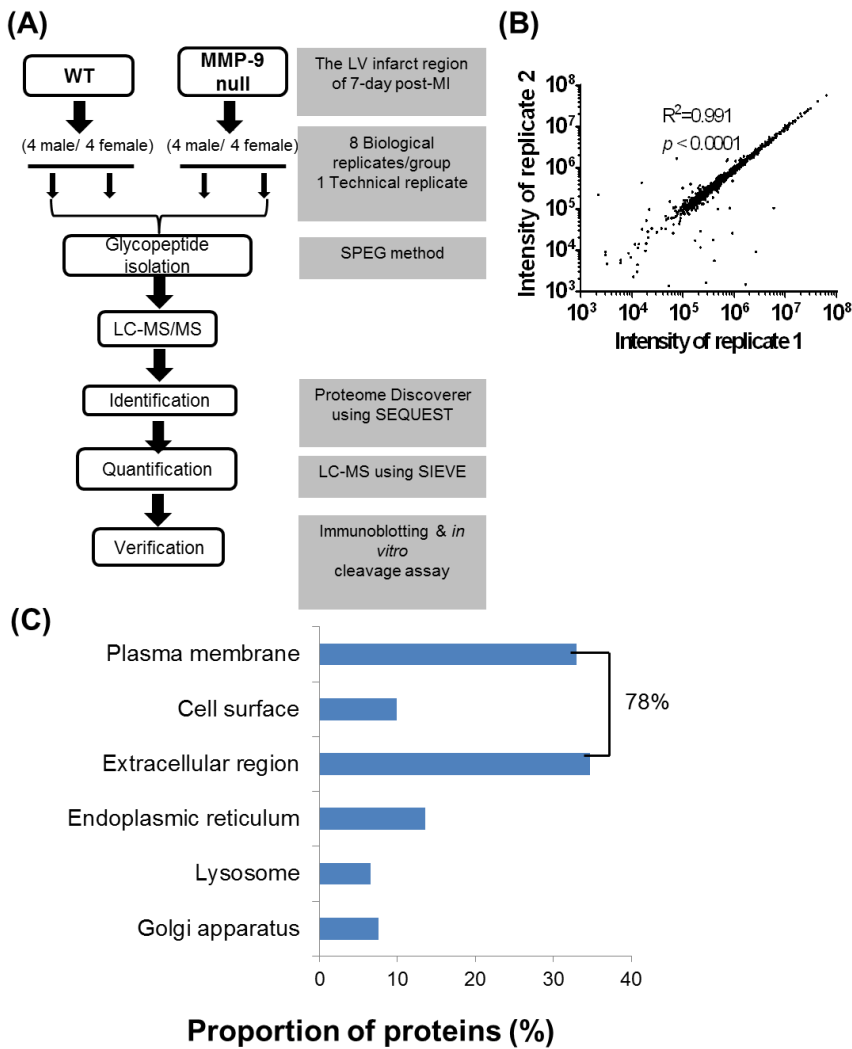

**Supplemental Figure S1. Experimental design.** (A) *N*-glycosylated peptides were isolated from infarcts (LVI) of WT and MMP-9 null mice at day 7 post-myocardial infarction using Solid-Phase Extraction of N-linked Glycopeptides (SPEG) method and subjected to LC-MS/MS analysis (n=8/group). (B) Plot of the technical replicates shows good reproducibility ( $R^2=0.991$ ,  $p < 0.0001$ ; See also Supplemental Table S1). LC-MS method was used to quantify the peptide abundance followed by immunoassay validation and *in vitro* cleavage assay. (C) Gene Ontology (GO) analysis reveals the cellular components of the identified *N*-glycoproteins. See also Supplemental Table S4.

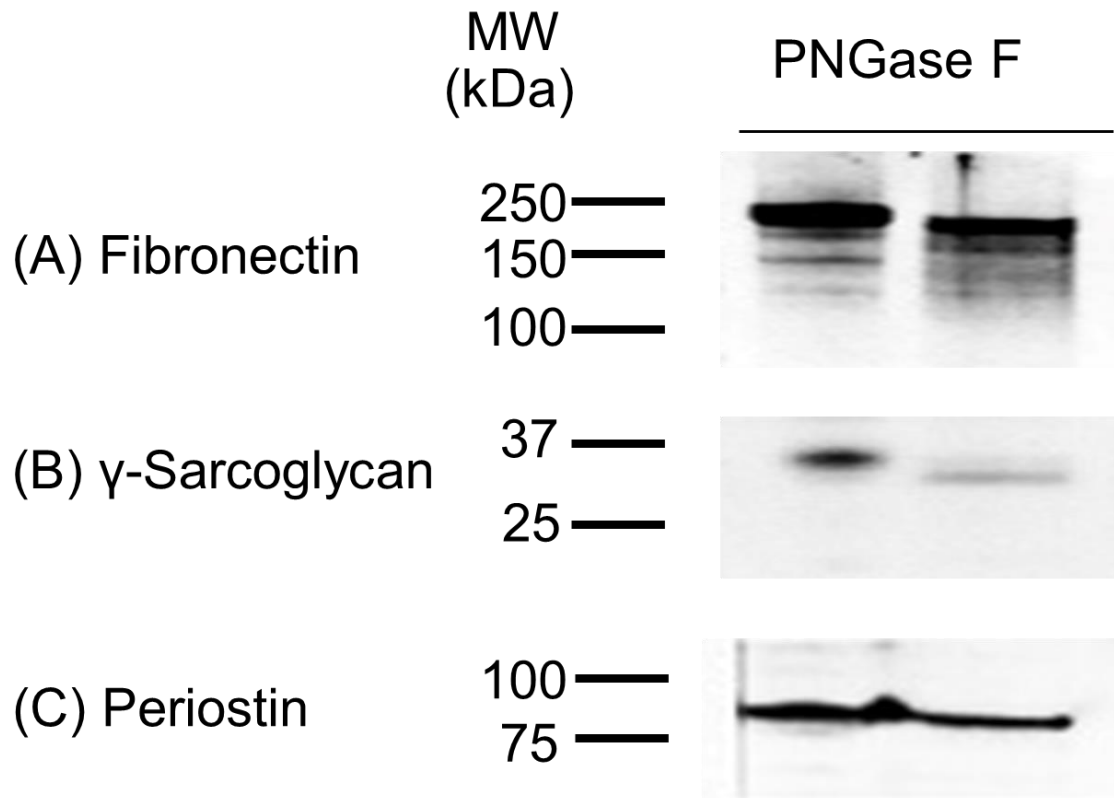

**Supplemental Figure S2.** Confirmation of the glycosylation for fibronectin,  $\gamma$ -sarcoglycan, and periostin. The molecular weight of these proteins was reduced after PNGase F treatment indicating these proteins were in fact glycosylated.

**Protein Group**

| Accession     | Protein                         | Peptide    | Modification  | XCorr | Charge | m/z [Da] | MH+ [Da] | RT [min] |
|---------------|---------------------------------|------------|---------------|-------|--------|----------|----------|----------|
| IPI00114439.2 | Growth differentiation factor 3 | VLYFNLSAIK | Deamidated(5) | 2.49  | 2      | 584.835  | 1168.663 | 52.91    |

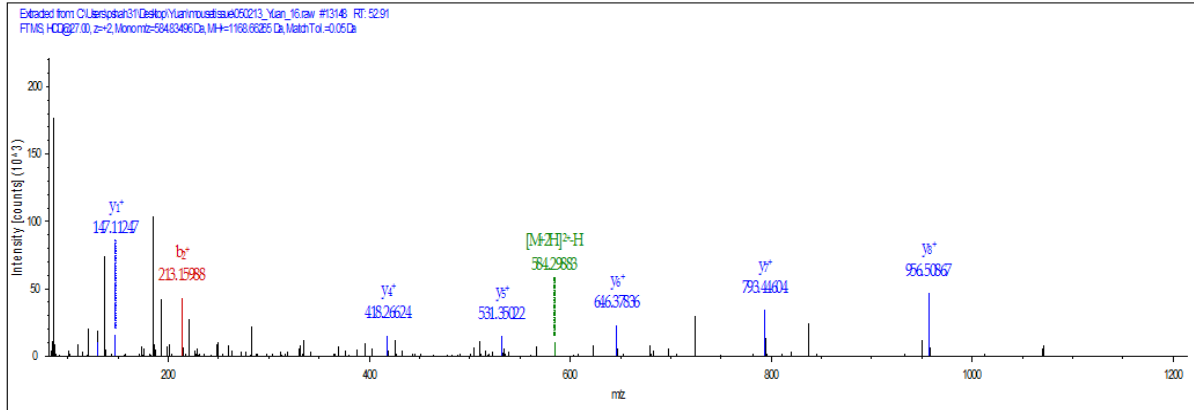

UDP-GalNAc: beta-1,3-N-  
acetylgalactosaminyltransferase  
se 1

|               |      |               |               |      |   |         |          |       |
|---------------|------|---------------|---------------|------|---|---------|----------|-------|
| IPI00119759.1 | se 1 | QDFLDTYNNLTLK | Deamidated(8) | 2.44 | 2 | 793.391 | 1585.776 | 51.72 |
|---------------|------|---------------|---------------|------|---|---------|----------|-------|

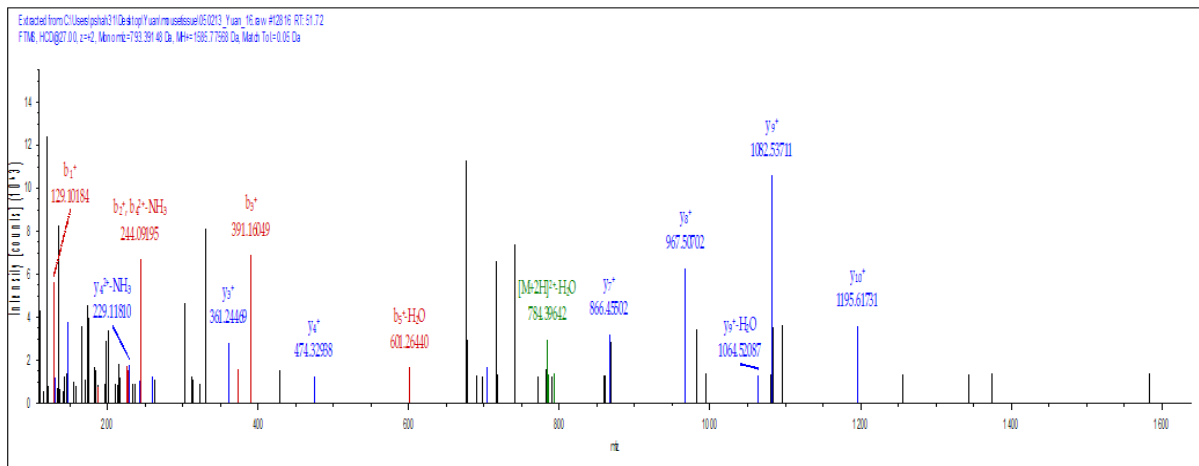

INTTIGSVAAQDPDAARN  
PVKYSVDR Deamidated(18):C  
arabamyl

|               |            |          |                              |      |   |         |          |       |
|---------------|------------|----------|------------------------------|------|---|---------|----------|-------|
| IPI00123942.2 | Cadherin-6 | PVKYSVDR | Deamidated(18):C<br>arabamyl | 3.27 | 3 | 934.807 | 2802.406 | 60.07 |
|---------------|------------|----------|------------------------------|------|---|---------|----------|-------|

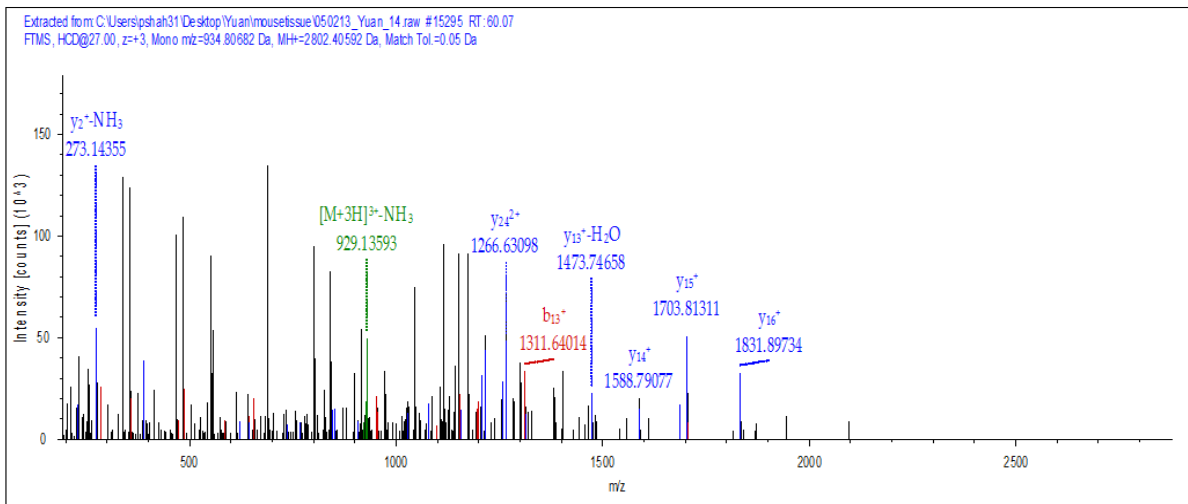

IPI00128022.2 protocadherin 7 isoform 2 IDNLGELSTSER Deamidated(3) 3.89 2 718.350 1435.693 35.99

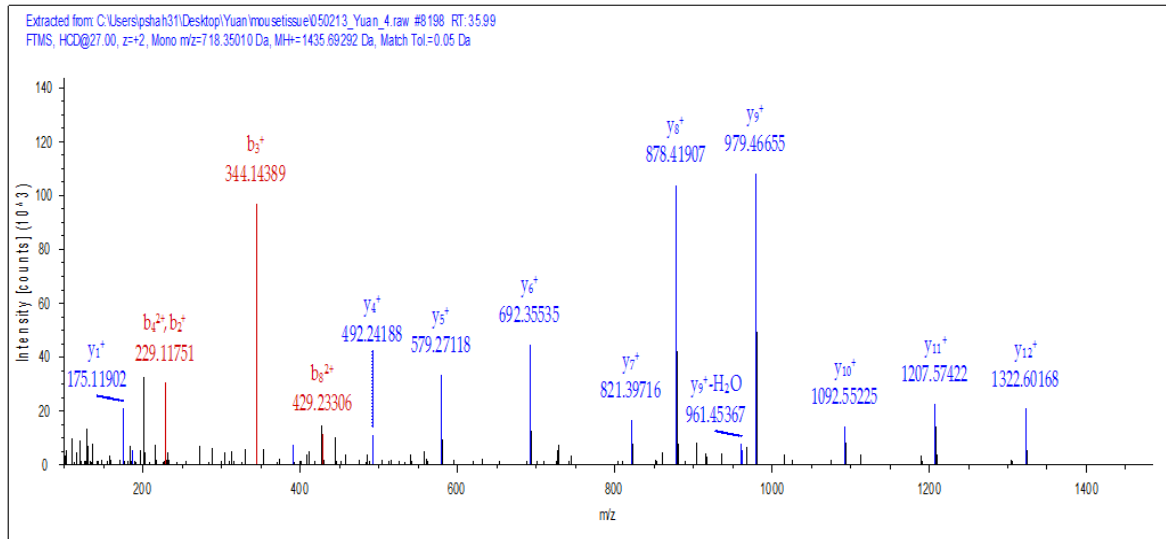

IPI00130758.1 Integral membrane protein 2B CYVIPLNTSIVMPPK Carbamidomethyl(1)Deamidated(7)Oxidation(12) 2.79 2 874.953 1748.898 51.3

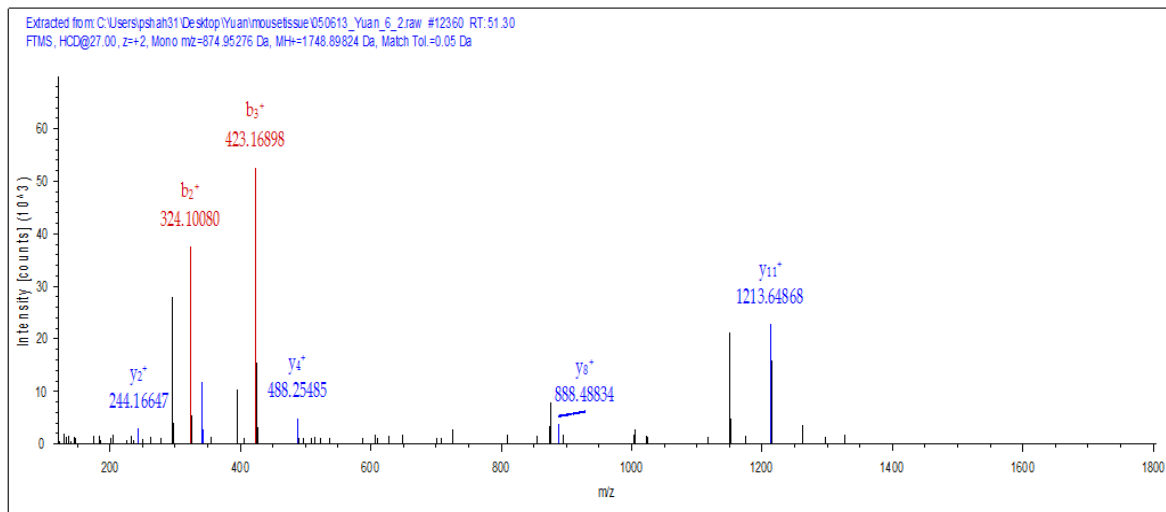

IPI00131898.1 Toll-like receptor 2 FLNLSSTGIR Deamidated(3) 2.68 2 554.803 1108.599 43.49

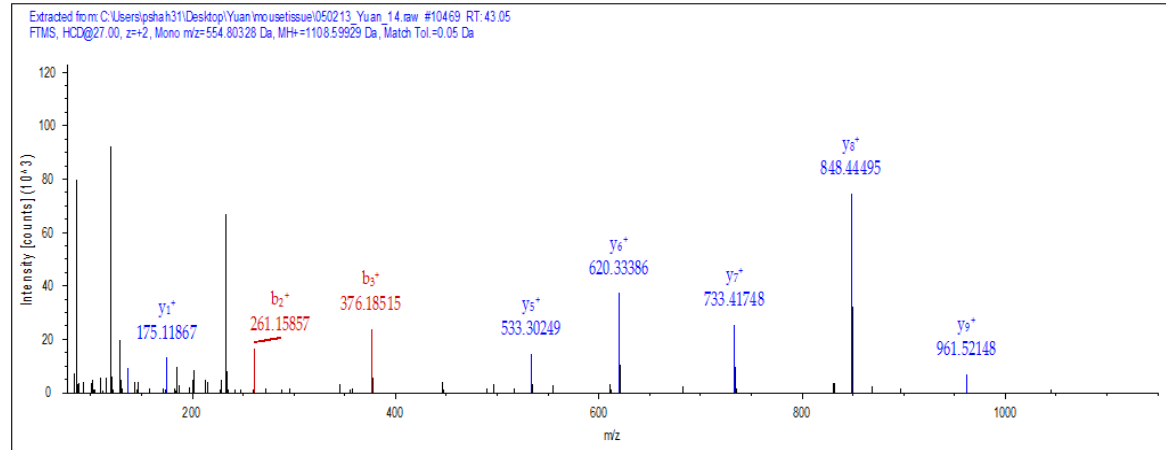



IPI00136513.1 Inhibin beta C chain FMFFVQFPHNATQTMNI Deamidated(16)Oxidation(2)Oxidation  
 R (15) 3.64 3 754.687 2262.046 48.73

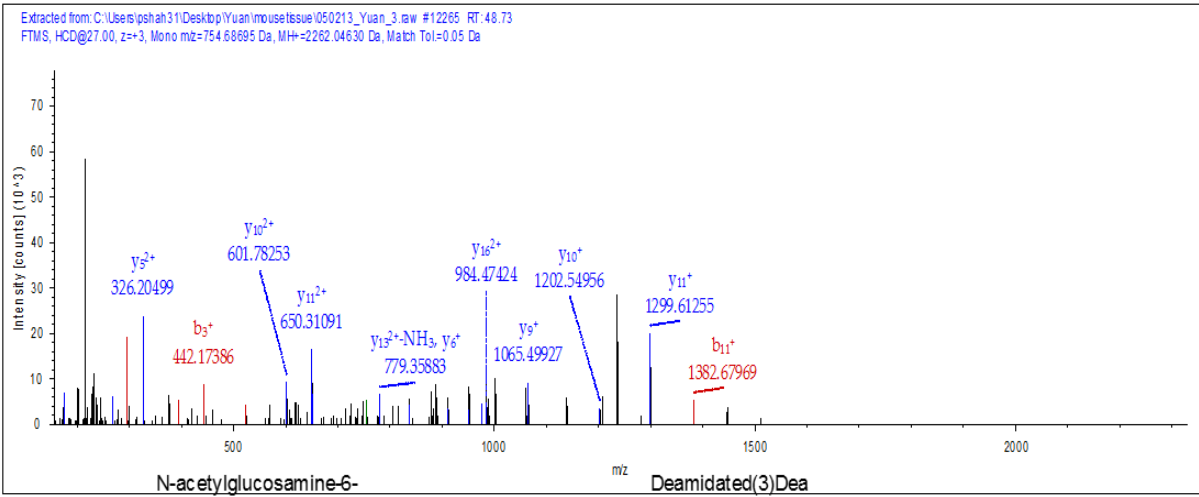

IPI00221426.3 sulfatase YYNYTSLNGK midated(9) 2.63 2 669.316 1337.625 40.66

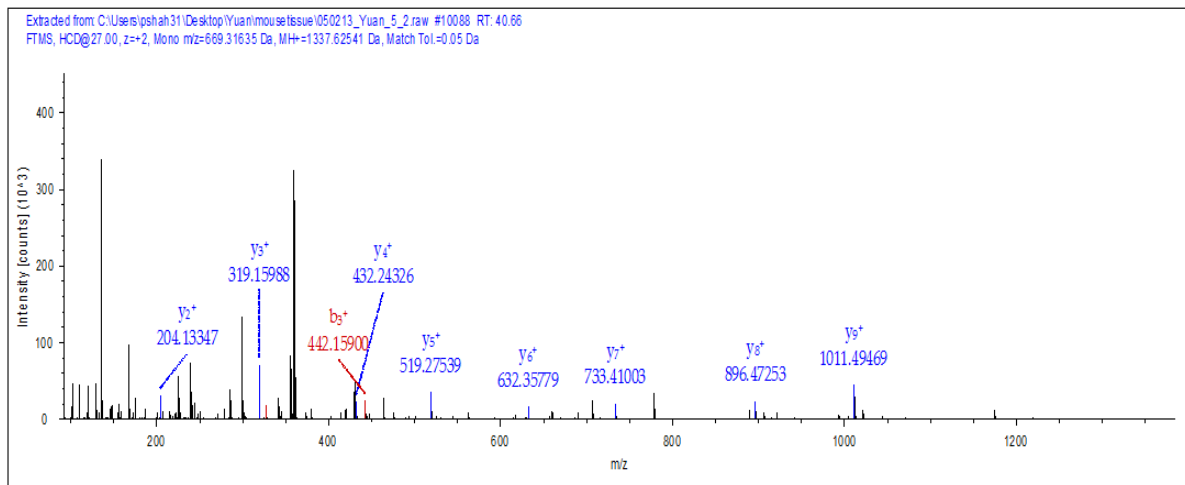

IPI00222937.1 kDa protein 13 NSTIQAANLAGLK Deamidated(1) 2.86 2 651.356 1301.705 39.66

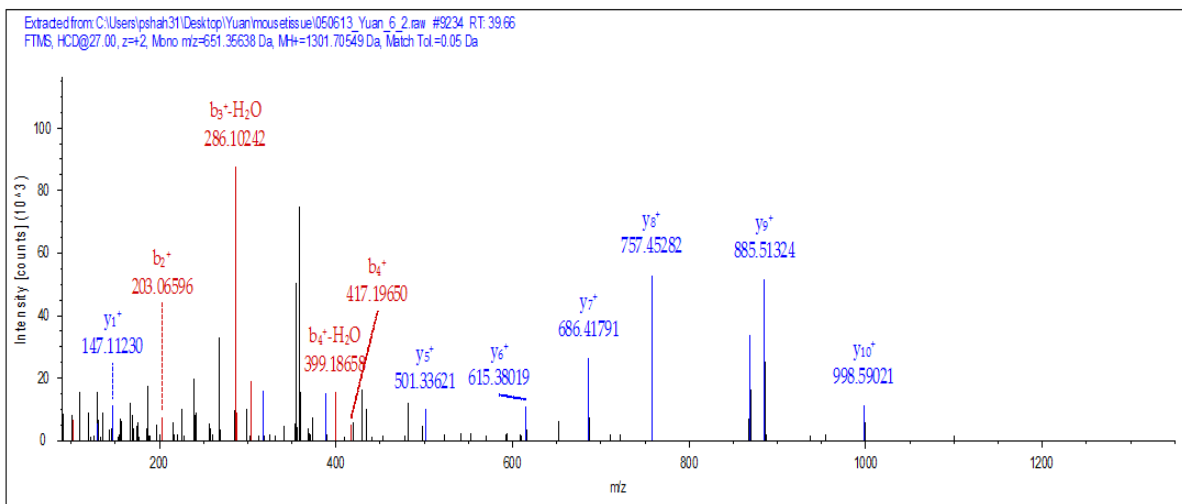

Receptor-type tyrosine-  
 IPI00229935.3 protein phosphatase beta SFPVYINGSTVPSPVK Deamidated(7) 4.28 2 846.946 1692.884 47.36

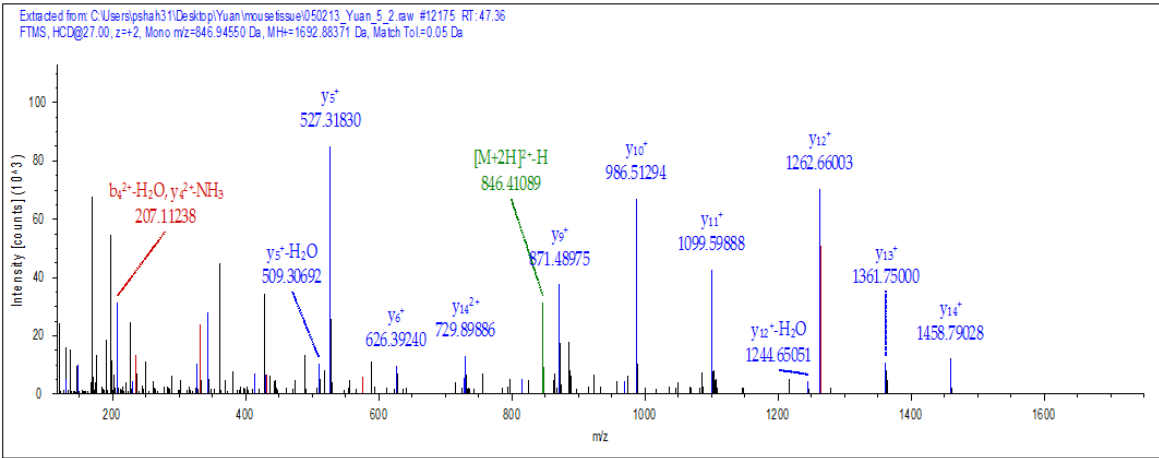

Transforming growth factor  
 IPI00314779.1 beta receptor type 3 AGVVFVFNCSLR Carbamidomethyl(8)Deamidated(7) 2.67 2 611.816 1222.626 41.57

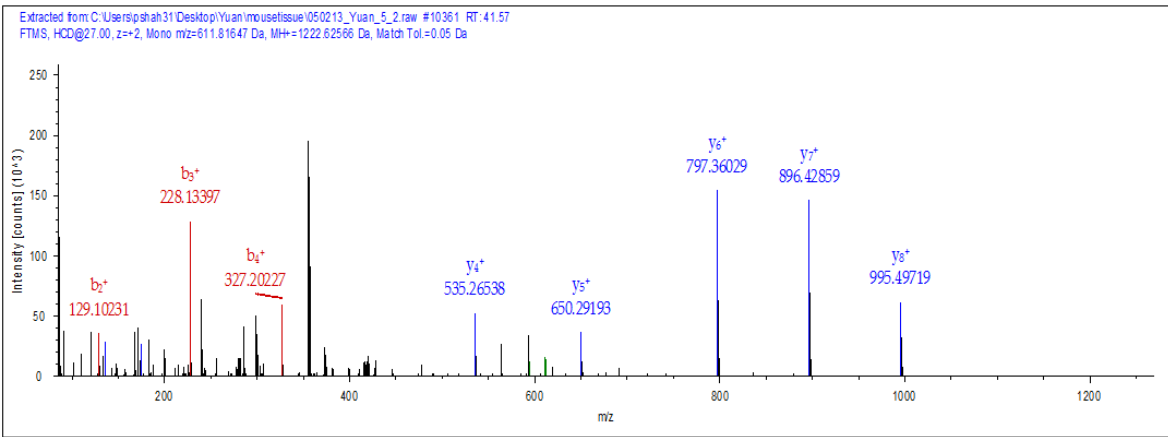

IPI00320675.2 Complement factor I FNVSLIYGR Deamidated(2) 2.6 2 535.288 1069.568 47.82

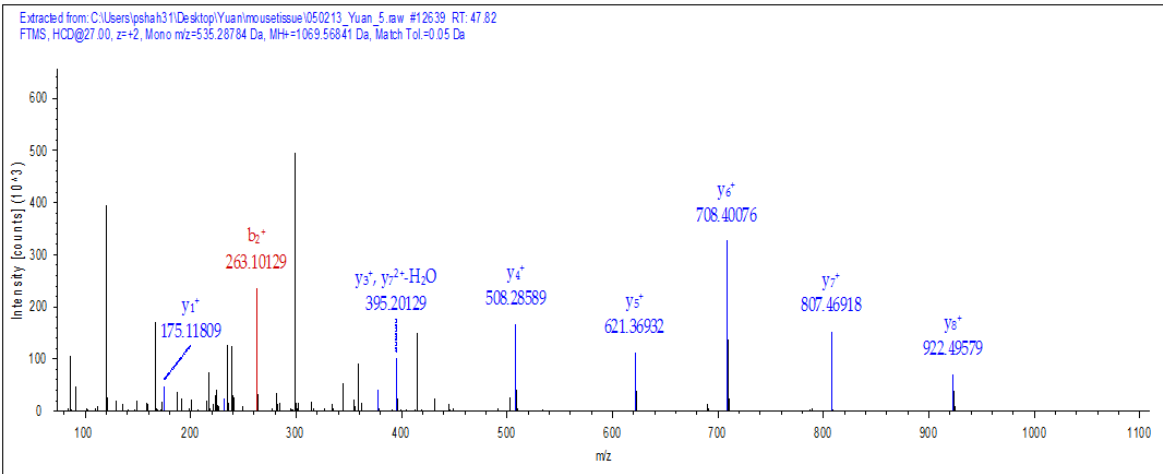

IPI00404126.2 Tetraspanin 3 TYNGTNSDAASR Deamidated(3) 2.69 2 629.270 1257.534 16.06

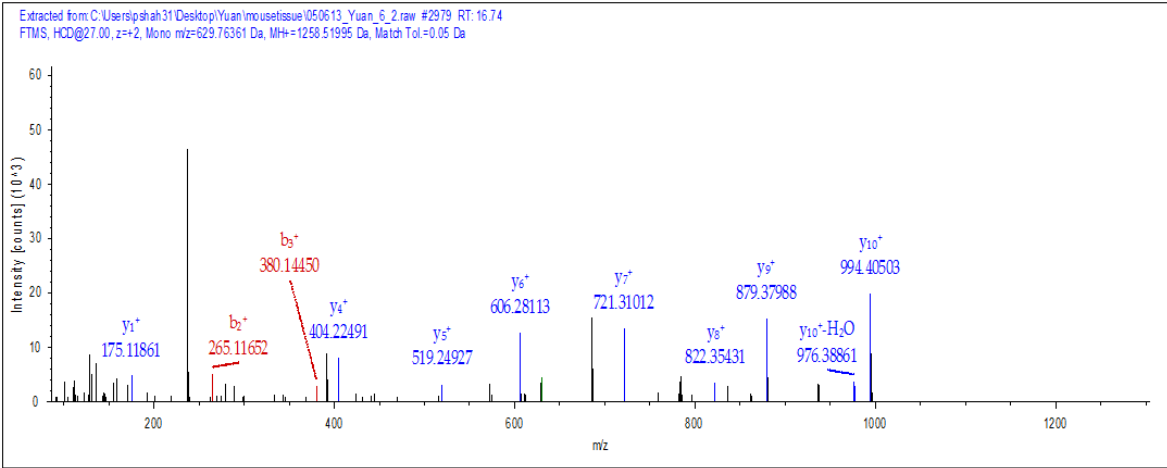

Keratin, type II cytoskeletal

IPI00462140.1 1b WELLQQVNTSTR Deamidated(8) 3.65 2 738.379 1475.751 44.75

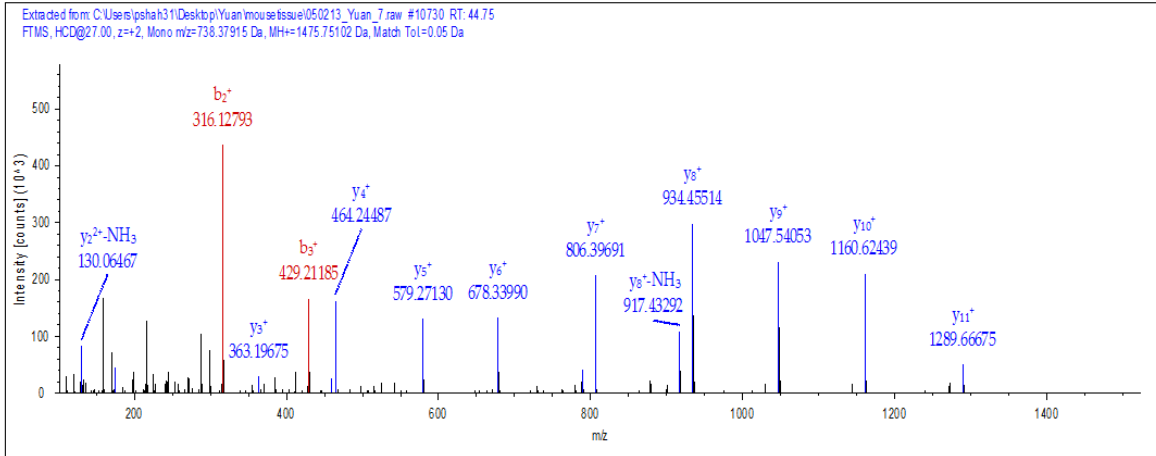

Macrophage galactose N-acetyl-galactosamine specific

IPI00648264.4 lectin 1 ATLNTTTSK Deamidated(5) 2.71 2 476.234 951.460 18.66

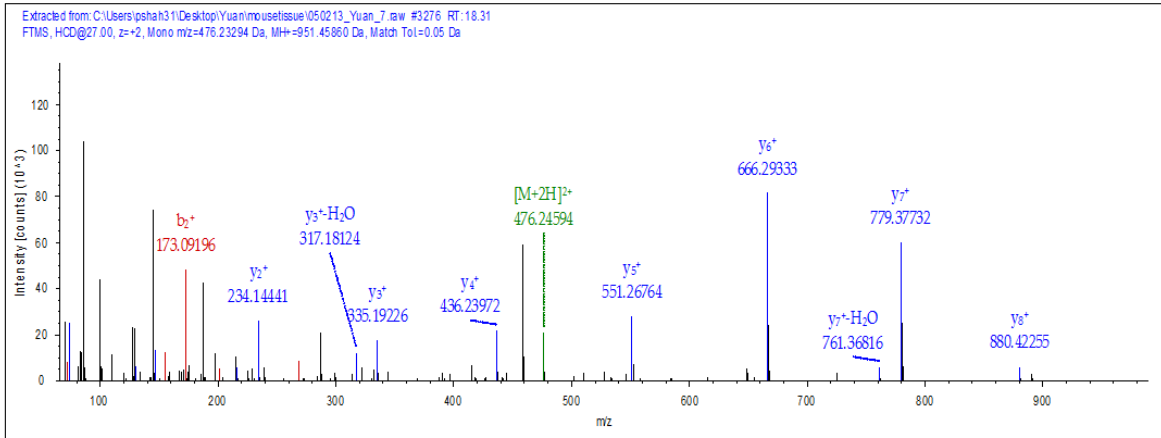

IPI00648426.1 Isoform 2 of Intraflagellar transport protein 20 homolog K MAKDILGEAGLHFDELN Deamidated(17)Oxidation(1) 3.18 4 505.255 2017.997 37.45

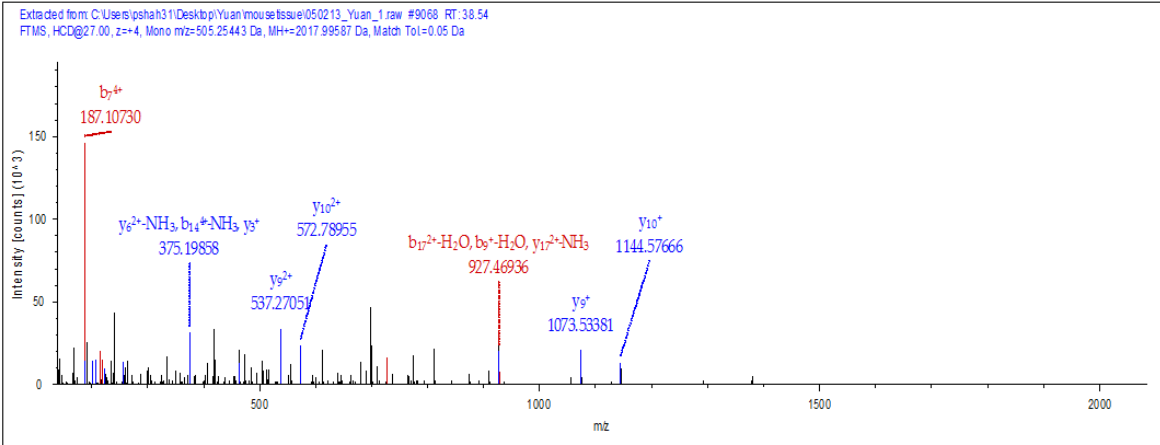

IPI00751342.1 Matrix metalloproteinase 9 TSNLTDQLAEAYLYR Deamidated(3) 4.82 2 930.460 1859.913 48.21

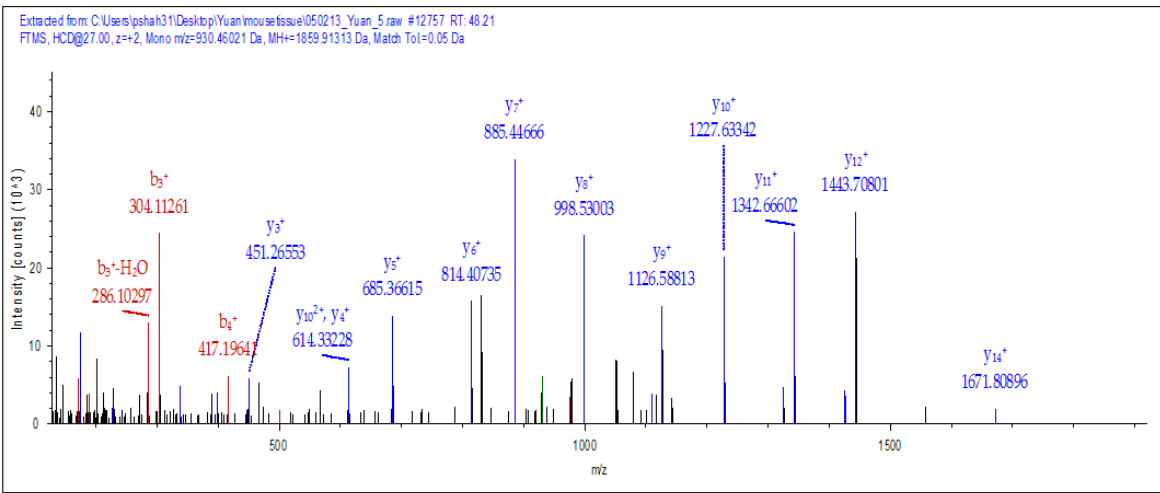

IPI00880438.1 Transmembrane 9 superfamily member 1 IIFANVSVR Deamidated(5) 2.43 2 510.298 1019.589 41.03

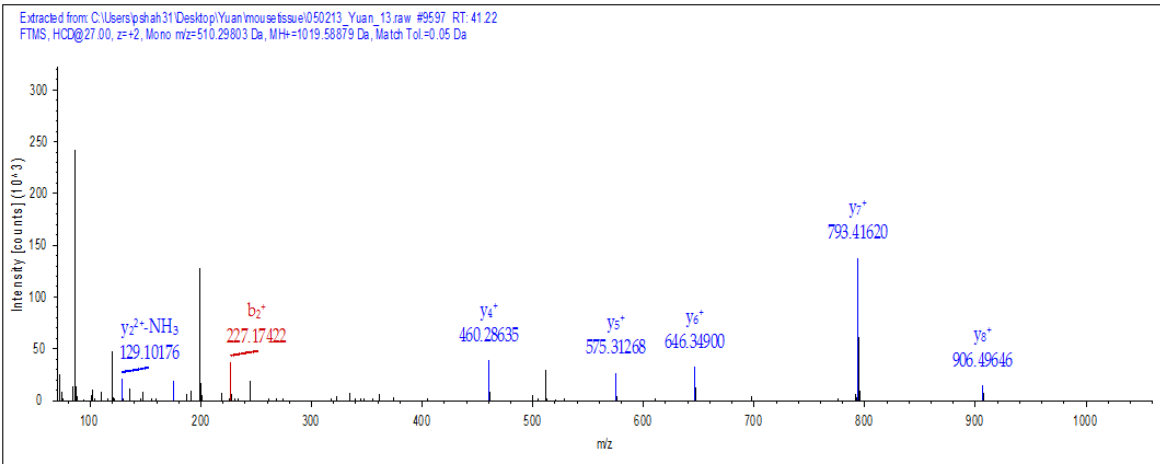

IPI00915512.1 S LLR Deamidated(11) 4.18 3 643.357 1928.058 58.93

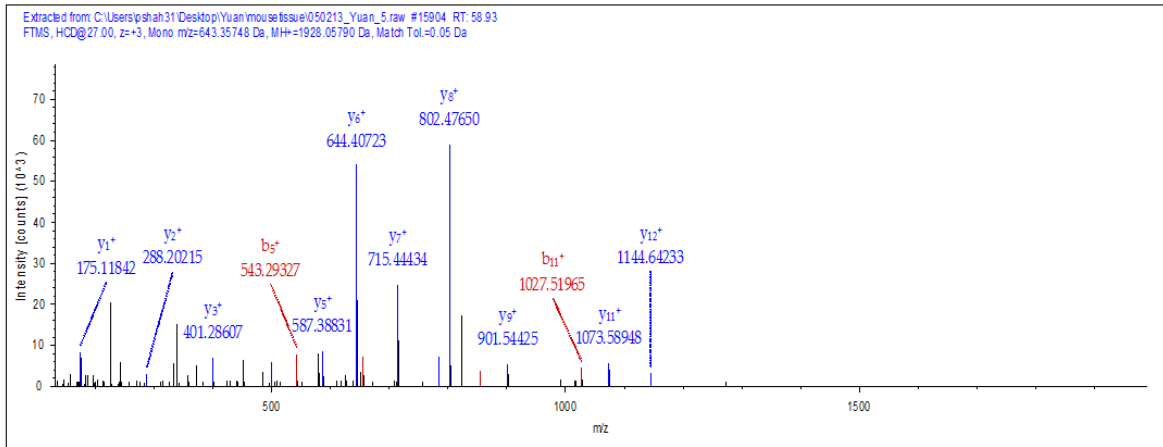

IPI00974634.1 locus 6 TLR 6)Deamidated(3) 3.35 4 602.788 2408.130 35.22

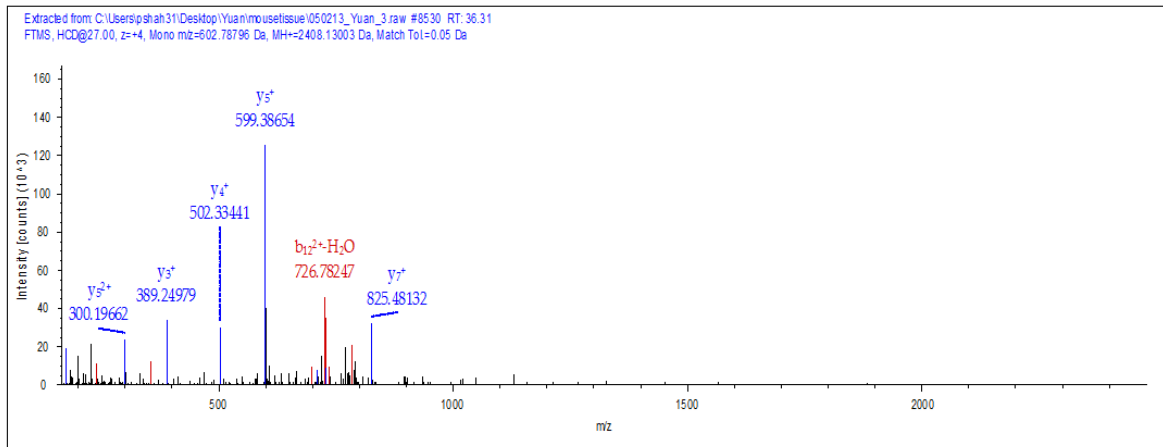

IPI00986446.1 Biotinidase FNDTEVLQR Deamidated(2) 2.44 2 561.775 1122.543 31.15

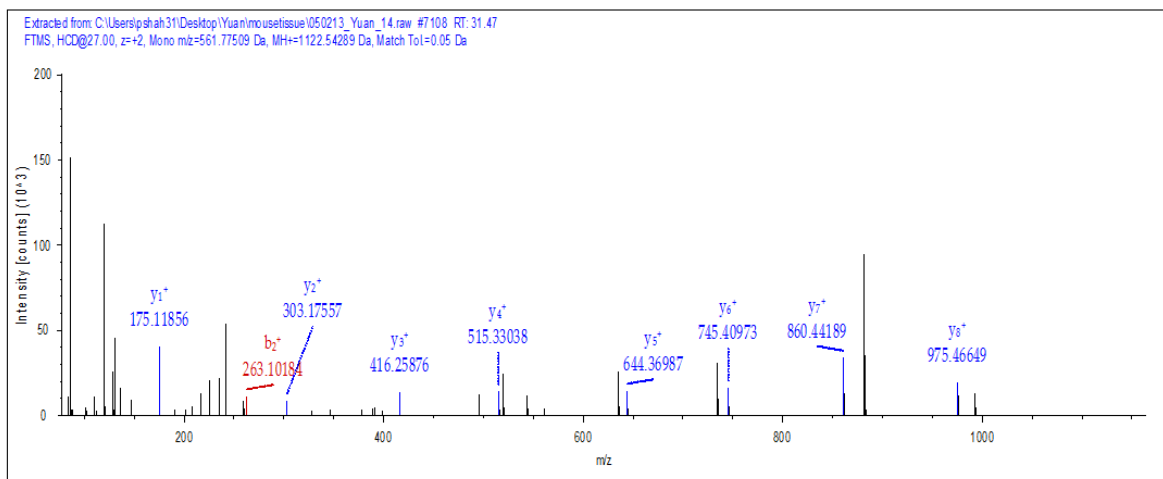

UDP-N-acetyl-alpha-D-galactosamine: polypeptide N-acetylglucosaminyltransferase 1  
 Deamidated(15)Oxidation(7)  
 IPI00987704.1 INQFNLMASEMIALNR (11) 2.51 2 949.460 1897.913 45.55

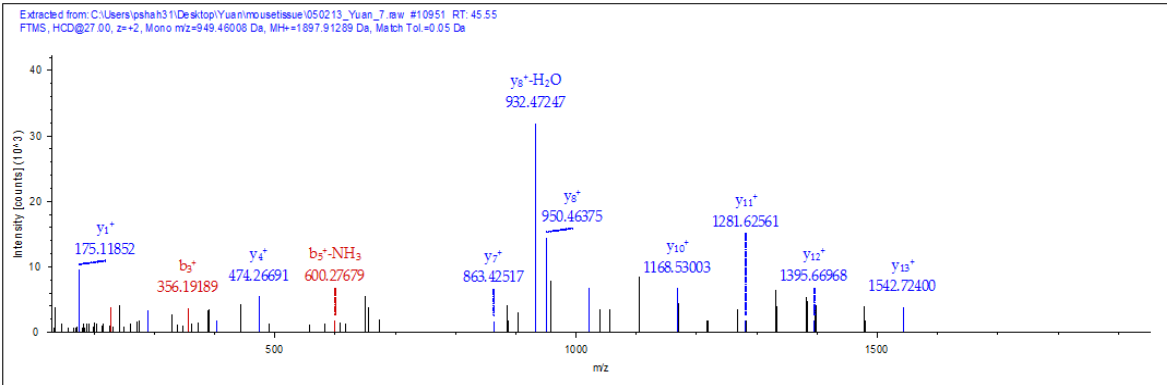

Chondroitin sulfate glucuronyltransferase  
 IPI00988480.1 ATLSTLAVAVNR Deamidated(11) 2.62 2 608.849 1216.690 40.15

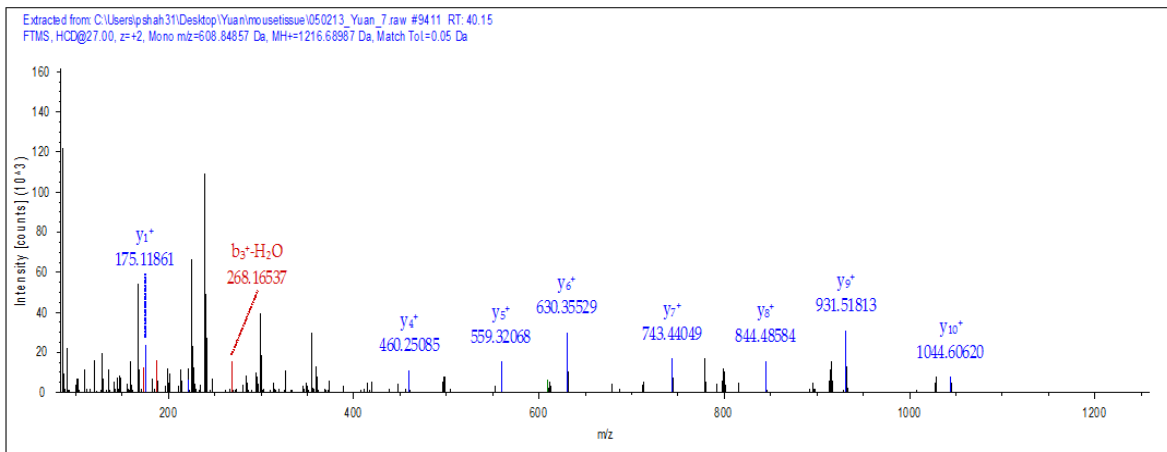

alpha-1-antitrypsin 1-6 isoform 2  
 IPI01007946.1 GVKDLYHSDMISINFTDS SQAK Deamidated(14):C arbamyl 3.57 3 834.066 2500.183 38.52

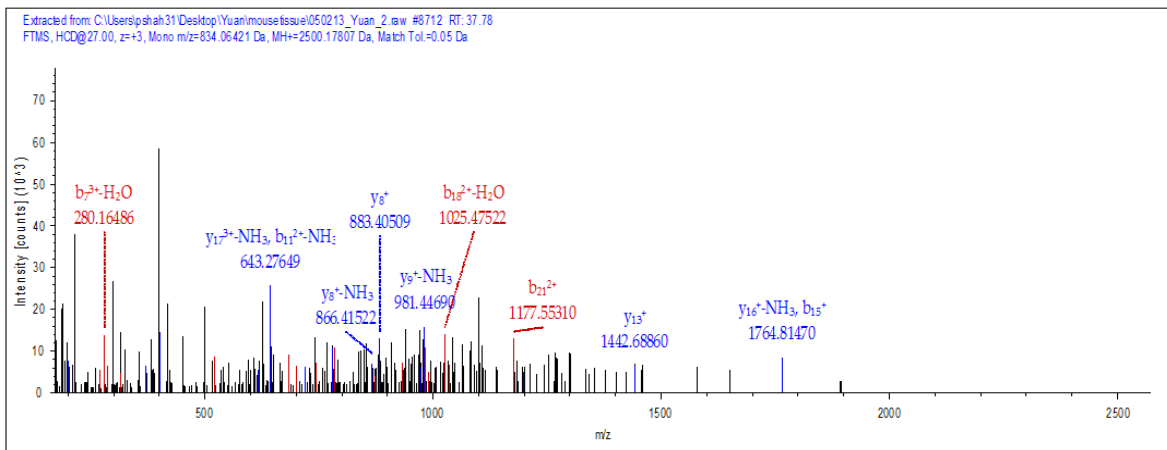

**Supplemental Figure S3.** The annotated MS/MS spectra for the 24 single glycopeptides identified.

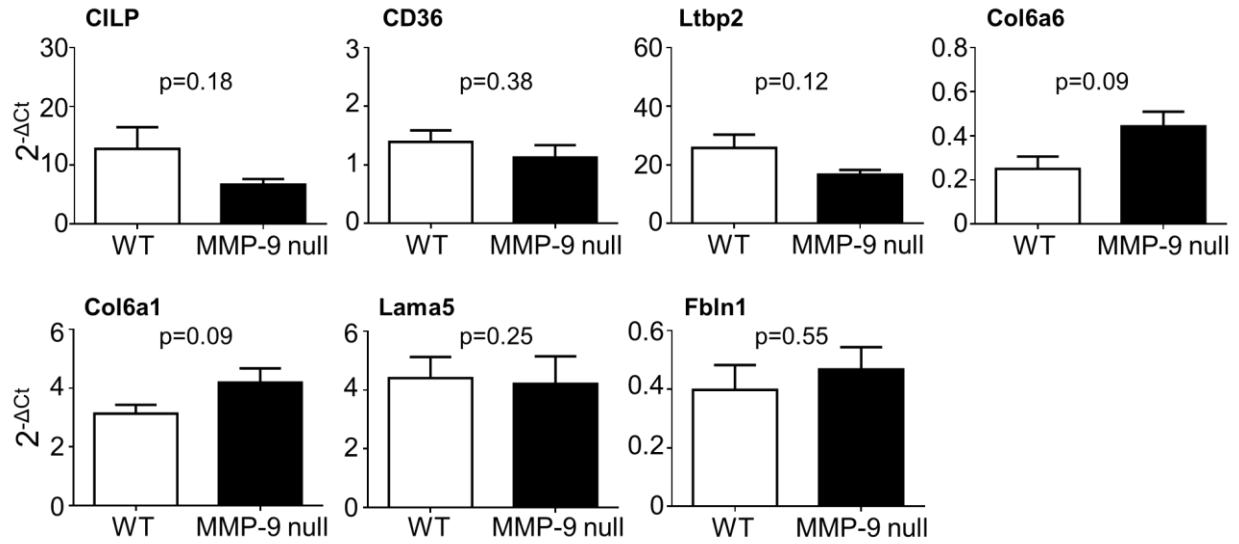

**Supplemental Figure S4.** RT-PCR analysis of the infarct (LVI) showed 7 of the top 12 proteins identified by glycoproteomics were not significantly different between WT and MMP-9 null. This highlights the importance of examining protein level changes in addition to gene level changes. Data are represented as mean  $\pm$  SEM. n=8/group.

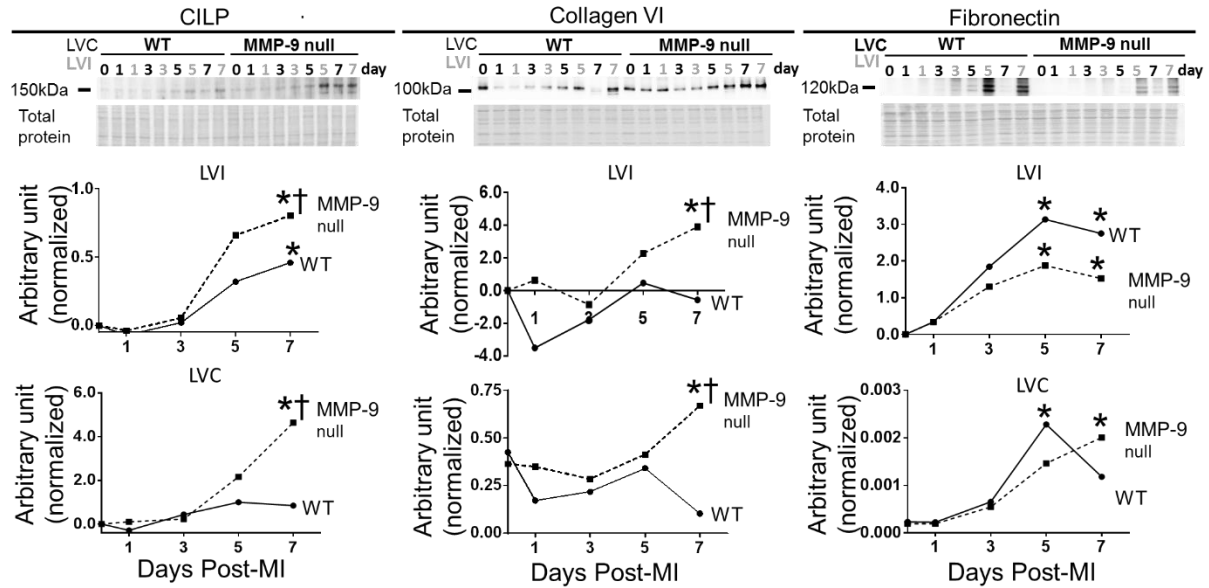

**Supplemental Figure S5.** Immunoblotting of CILP, collagen VI, and fibronectin showed CILP expression increased in WT mice post-MI in both LVI and LVC. This increase was exacerbated by MMP-9 deletion. Collagen VI increased at day 7 post-MI in MMP-9 null mice only and fibronectin was higher in the WT group compared to MMP-9 null indicating these proteins are most likely not substrates of MMP-9. Data are represented as mean. \* $p < 0.05$  vs D0; † $p < 0.05$  vs WT; Samples ( $n=8$ /group) were pooled and run in triplicate.
